# Supplementary material for: Optimized iminium-catalysed 1,4-reductions inside the resorcinarene capsule: achieving >90% ee with proline as catalyst
Source: Royal Society of Chemistry journal article supplement (doi:10.1039/d1ra04333a), 2021-01-01
Supplement: d1ra04333a2.pdf [file d1ra04333a2.pdf]

## Electronic Supplementary Information (achiral and chiral GC spectra)

### Optimized iminium-catalysed 1,4-reductions inside the resorcinarene capsule: Achieving >90% *ee* with proline as catalyst

Daria Sokolova<sup>a</sup> and Konrad Tiefenbacher<sup>\*a,b</sup>

<sup>a</sup> Department of Chemistry, University of Basel, Basel 4058, Switzerland

<sup>b</sup> Department of Biosystems Science and Engineering, ETH Zürich, CH-4058 Basel, Switzerland

#### Table of content

|     |                                                                                              |     |
|-----|----------------------------------------------------------------------------------------------|-----|
| 1.  | Achiral spectra.....                                                                         | 2   |
| 1.1 | Achiral GC spectra of Table 1 of the manuscript (optimization of alcohol additive) .....     | 2   |
| 1.2 | Achiral GC spectra for Fig. 4 of the Manuscript (initial conversions/ <i>ees</i> ) .....     | 75  |
| 1.3 | Achiral GC spectra for Table 2 of the Manuscript (reactions with different substrates) ..... | 159 |
| 2.  | Chiral spectra.....                                                                          | 386 |
| 2.1 | Chiral GC spectra of Table S1 (optimization of capsule loading) .....                        | 386 |
| 2.2 | Chiral GC spectra of Table S2 (optimization of L-proline loading) .....                      | 396 |
| 2.3 | Chiral GC spectra of Table S3 (optimization of HCl content) .....                            | 404 |
| 2.4 | Chiral GC spectra of Table S4 (optimization of alcohol additive loading) .....               | 424 |
| 2.5 | Chiral GC spectra of Table 1 of the manuscript (optimization of alcohol additive) .....      | 444 |
| 2.6 | Chiral GC spectra of Fig. 3 of the manuscript and Table S5 (NLE studies) .....               | 462 |
| 2.7 | Chiral GC spectra of Fig. 4 of the manuscript (initial conversions/ <i>ees</i> ) .....       | 495 |
| 2.8 | Chiral GC spectra for Table 2 of the Manuscript (reactions with different substrates).....   | 575 |

# 1. Achiral spectra

## 1.1 Achiral GC spectra of Table 1 of the manuscript (optimization of alcohol additive)

Entry 1

t = 0 min

Sample Name : t=0\_SOD\_654  
Sample ID :  
Data Filename : t=0\_SOD\_654.gcd  
Method Filename : Methode\_Achiral\_MUC\_Integration.gcm  
Batch Filename : batch.gcb  
Vial # : 11  
Injection Volume : 5 uL  
Date Acquired : 25.03.2019 18:26:51  
Date Processed : 25.03.2019 18:47:35

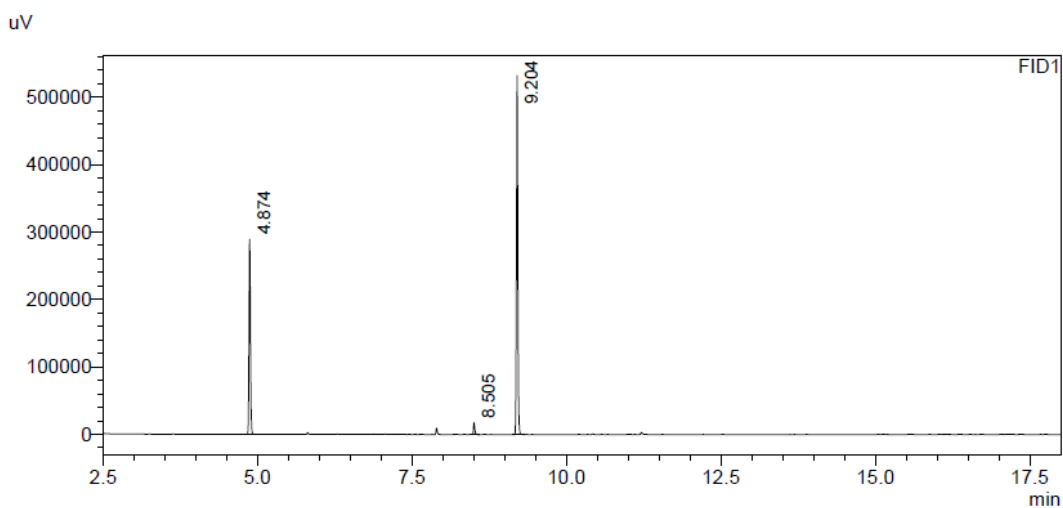

FID1

| Peak# | Ret. Time | Area    | Area%   |
|-------|-----------|---------|---------|
| 1     | 4.874     | 456851  | 35.238  |
| 2     | 8.505     | 25037   | 1.931   |
| 3     | 9.204     | 814581  | 62.831  |
| Total |           | 1296469 | 100.000 |

Sample Name : t=0\_SOD\_668  
 Sample ID :  
 Data Filename : t=0\_SOD\_668.gcd  
 Method Filename : Methode\_Achiral\_MUC\_Integration.gcm  
 Batch Filename : batch.gcb  
 Vial # : 34  
 Injection Volume : 5 uL  
 Date Acquired : 03.04.2019 01:15:16  
 Date Processed : 03.04.2019 01:36:00

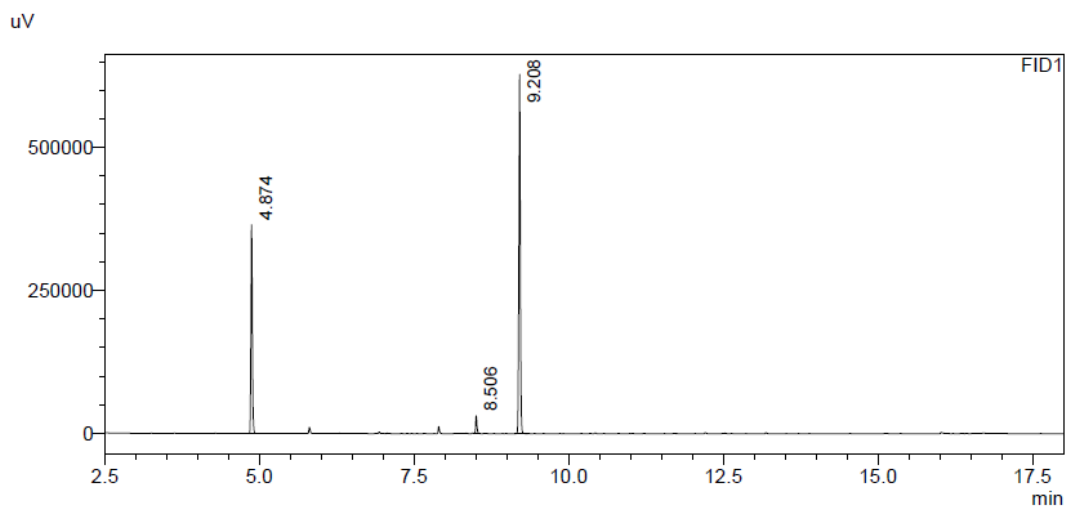

FID1

| Peak# | Ret. Time | Area    | Area%   |
|-------|-----------|---------|---------|
| 1     | 4.874     | 576070  | 35.216  |
| 2     | 8.506     | 45026   | 2.753   |
| 3     | 9.208     | 1014728 | 62.032  |
| Total |           | 1635824 | 100.000 |

Sample Name : t=0\_SOD\_669  
Sample ID :  
Data Filename : t=0\_SOD\_669.gcd  
Method Filename : Methode\_Achiral\_MUC\_Integration.gcm  
Batch Filename : batch.gcb  
Vial # : 35  
Injection Volume : 5 uL  
Date Acquired : 03.04.2019 01:40:37  
Date Processed : 03.04.2019 02:01:21

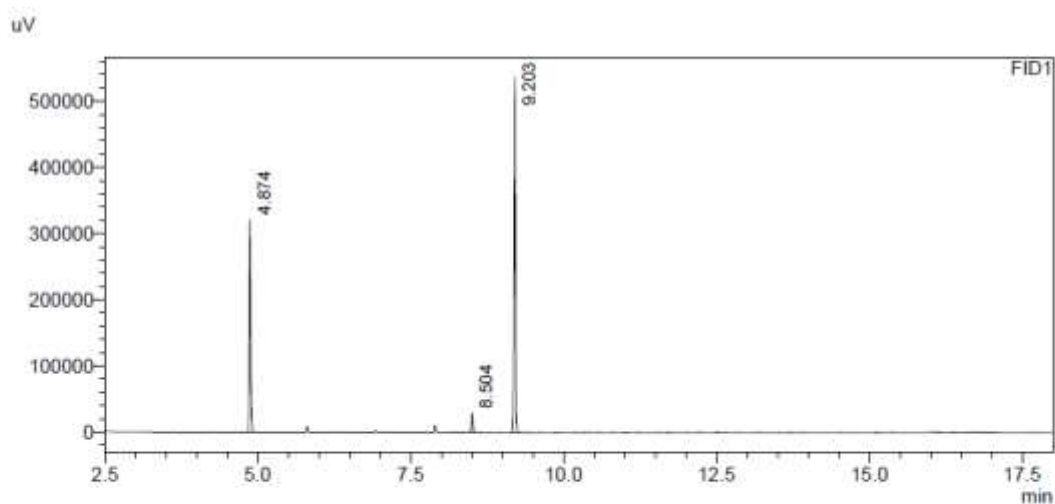

FID1

| Peak# | Ret. Time | Area    | Area%   |
|-------|-----------|---------|---------|
| 1     | 4.874     | 497812  | 36.332  |
| 2     | 8.504     | 41229   | 3.009   |
| 3     | 9.203     | 831123  | 60.659  |
| Total |           | 1370164 | 100.000 |

t = 24 h

Sample Name : t=24\_SOD\_654  
Sample ID :  
Data Filename : t=24\_SOD\_654.gcd  
Method Filename : Methode\_Achiral\_MUC\_Integration.gcm  
Batch Filename : batch.gcb  
Vial # : 1  
Injection Volume : 5 uL  
Date Acquired : 26.03.2019 18:20:36  
Date Processed : 26.03.2019 18:41:21

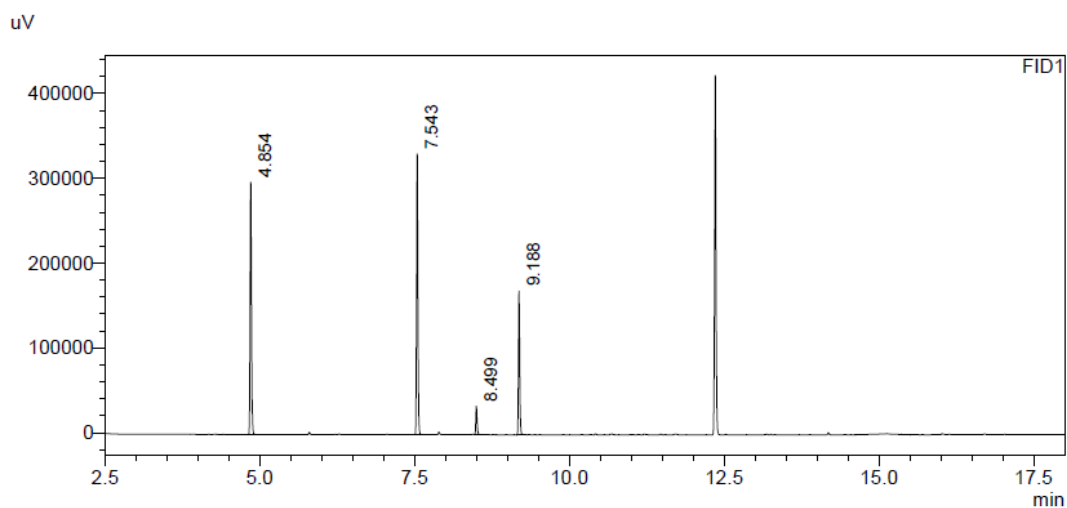

| Peak# | Ret. Time | Area    | Area%   |
|-------|-----------|---------|---------|
| 1     | 4.854     | 452074  | 36.819  |
| 2     | 7.543     | 487199  | 39.680  |
| 3     | 8.499     | 48915   | 3.984   |
| 4     | 9.188     | 239645  | 19.518  |
| Total |           | 1227834 | 100.000 |

Sample Name : t=24\_SOD\_668  
Sample ID :  
Data Filename : t=24\_SOD\_668.gcd  
Method Filename : Methode\_Achiral\_MUC\_Integration.gcm  
Batch Filename : batch.gcb  
Vial # : 84  
Injection Volume : 5 uL  
Date Acquired : 04.04.2019 10:39:19  
Date Processed : 04.04.2019 11:00:02

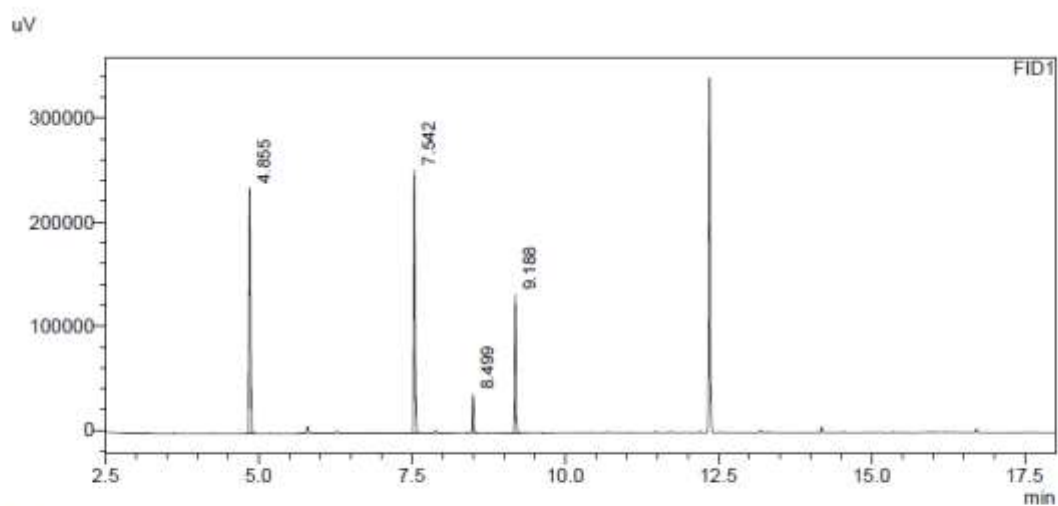

FID1

| Peak# | Ret. Time | Area   | Area%   |
|-------|-----------|--------|---------|
| 1     | 4.855     | 360831 | 37.383  |
| 2     | 7.542     | 365775 | 37.896  |
| 3     | 8.499     | 52976  | 5.488   |
| 4     | 9.188     | 185636 | 19.233  |
| Total |           | 965218 | 100.000 |

Sample Name : t=24\_SOD\_669  
Sample ID :  
Data Filename : t=24\_SOD\_669.gcd  
Method Filename : Methode\_Achiral\_MUC\_Integration.gcm  
Batch Filename : batch.gcb  
Vial # : 85  
Injection Volume : 5 uL  
Date Acquired : 04.04.2019 11:04:44  
Date Processed : 04.04.2019 11:25:27

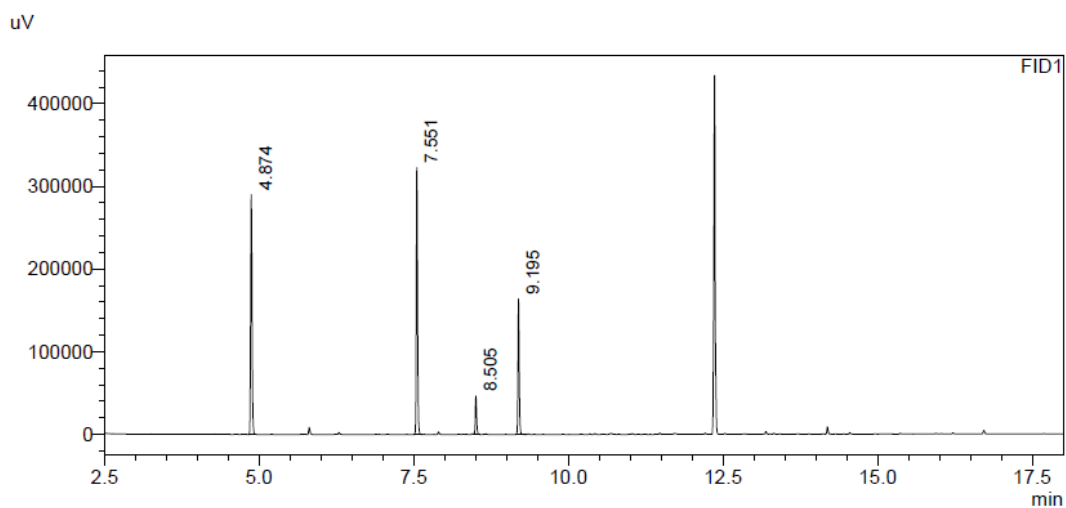

FID1

| Peak# | Ret. Time | Area    | Area%   |
|-------|-----------|---------|---------|
| 1     | 4.874     | 467189  | 37.979  |
| 2     | 7.551     | 466006  | 37.883  |
| 3     | 8.505     | 65774   | 5.347   |
| 4     | 9.195     | 231146  | 18.791  |
| Total |           | 1230116 | 100.000 |

t = 48 h

Sample Name : t=48\_SOD\_654  
Sample ID :  
Data Filename : t=48\_SOD\_654.gcd  
Method Filename : Methode\_Achiral\_MUC\_Integration.gcm  
Batch Filename : batch.gcb  
Vial # : 1  
Injection Volume : 5 uL  
Date Acquired : 27.03.2019 19:26:54  
Date Processed : 27.03.2019 19:47:39

uV

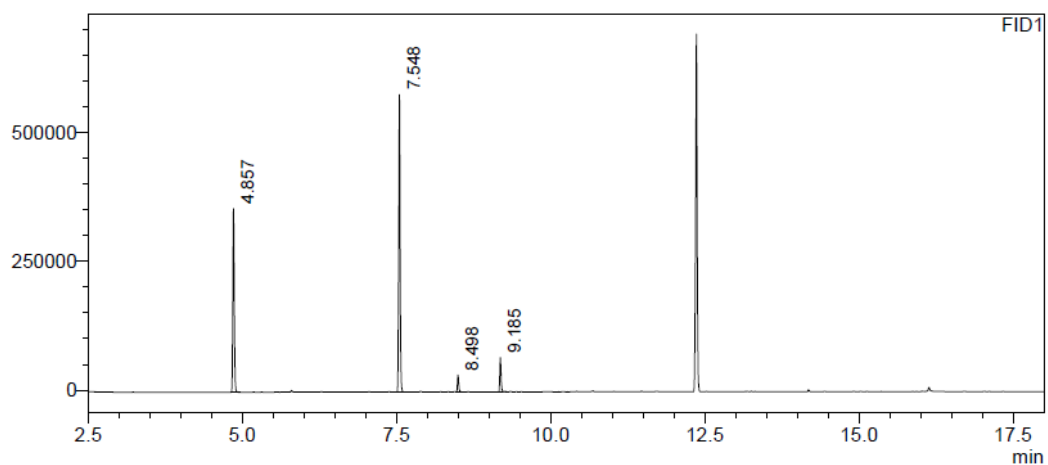

FID1

| Peak# | Ret. Time | Area    | Area%   |
|-------|-----------|---------|---------|
| 1     | 4.857     | 576039  | 35.816  |
| 2     | 7.548     | 891314  | 55.418  |
| 3     | 8.498     | 46785   | 2.909   |
| 4     | 9.185     | 94213   | 5.858   |
| Total |           | 1608350 | 100.000 |



Sample Name : t=48\_SOD\_668  
Sample ID :  
Data Filename : t=48\_SOD\_668.gcd  
Method Filename : Methode\_Achiral\_MUC\_Integration.gcm  
Batch Filename : batch.gcb  
Vial # : 114  
Injection Volume : 5 uL  
Date Acquired : 04.04.2019 23:22:26  
Date Processed : 04.04.2019 23:43:10

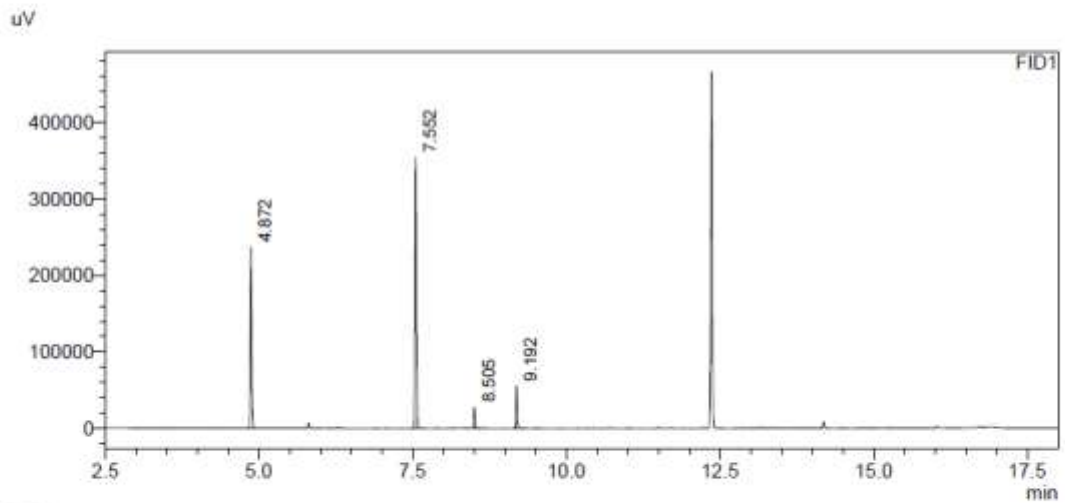

FID1

| Peak# | Ret. Time | Area    | Area%   |
|-------|-----------|---------|---------|
| 1     | 4.872     | 365222  | 36.334  |
| 2     | 7.552     | 520118  | 51.744  |
| 3     | 8.505     | 39541   | 3.934   |
| 4     | 9.192     | 80299   | 7.989   |
| Total |           | 1005181 | 100.000 |

Sample Name : t=48\_SOD\_669  
Sample ID :  
Data Filename : t=48\_SOD\_669.gcd  
Method Filename : Methode\_Achiral\_MUC\_Integration.gcm  
Batch Filename : batch.gcb  
Vial # : 115  
Injection Volume : 5 uL  
Date Acquired : 04.04.2019 23:47:53  
Date Processed : 05.04.2019 00:08:38

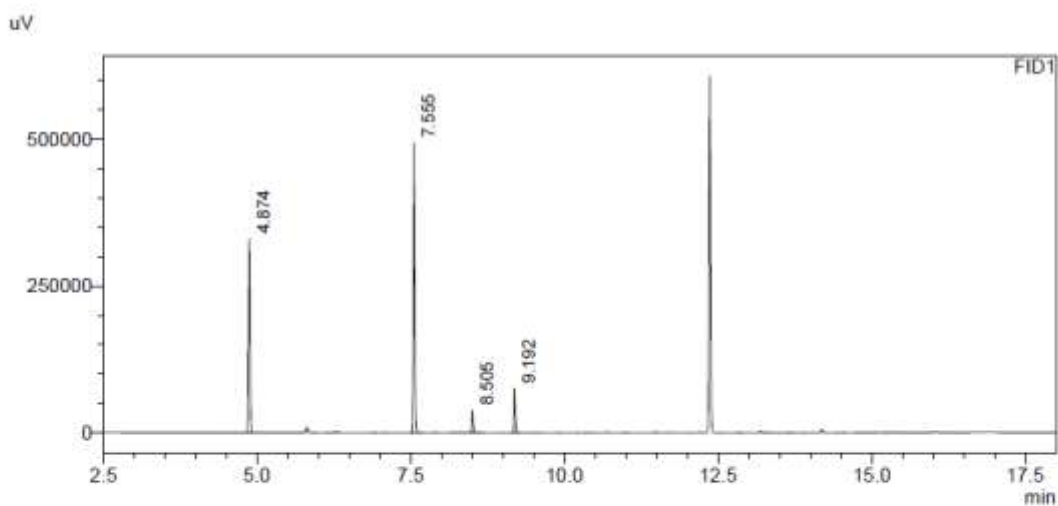

FID1

| Peak# | Ret. Time | Area    | Area%   |
|-------|-----------|---------|---------|
| 1     | 4.874     | 524357  | 36.824  |
| 2     | 7.555     | 736460  | 51.719  |
| 3     | 8.505     | 52725   | 3.703   |
| 4     | 9.192     | 110412  | 7.754   |
| Total |           | 1423954 | 100.000 |

t = 72 h

Sample Name : t=72\_SOD\_654  
Sample ID :  
Data Filename : t=72\_SOD\_654.gcd  
Method Filename : Methode\_Achiral\_MUC\_Integration.gcm  
Batch Filename : batch.gcb  
Vial # : 1  
Injection Volume : 5 uL  
Date Acquired : 28.03.2019 17:39:53  
Date Processed : 28.03.2019 18:00:36

uV

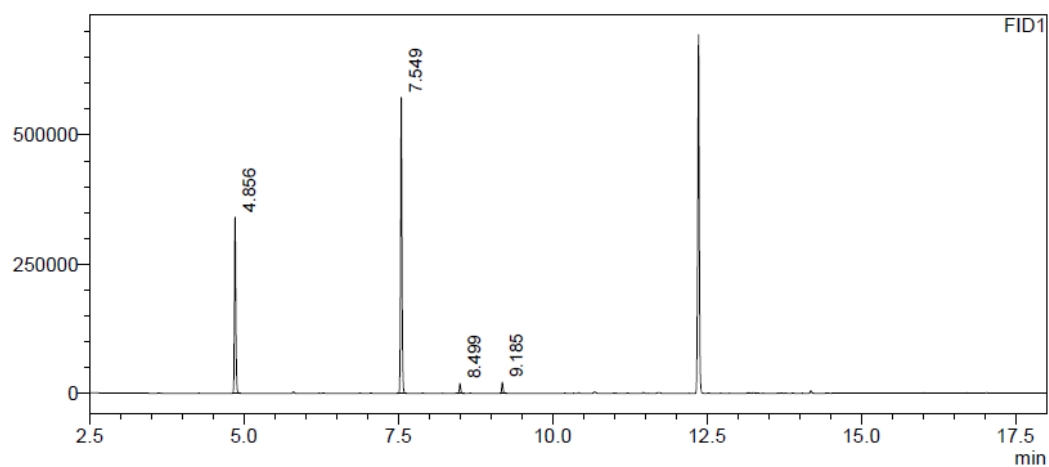

FID1

| Peak# | Ret. Time | Area    | Area%   |
|-------|-----------|---------|---------|
| 1     | 4.856     | 523863  | 35.966  |
| 2     | 7.549     | 874770  | 60.058  |
| 3     | 8.499     | 27157   | 1.864   |
| 4     | 9.185     | 30753   | 2.111   |
| Total |           | 1456543 | 100.000 |

Sample Name : t=72\_SOD\_668  
 Sample ID :  
 Data Filename : t=72\_SOD\_668.gcd  
 Method Filename : Methode\_Achiral\_MUC\_Integration.gcm  
 Batch Filename : batch.gcb  
 Vial # : 1  
 Injection Volume : 5 uL  
 Date Acquired : 06.04.2019 12:20:27  
 Date Processed : 06.04.2019 12:41:11

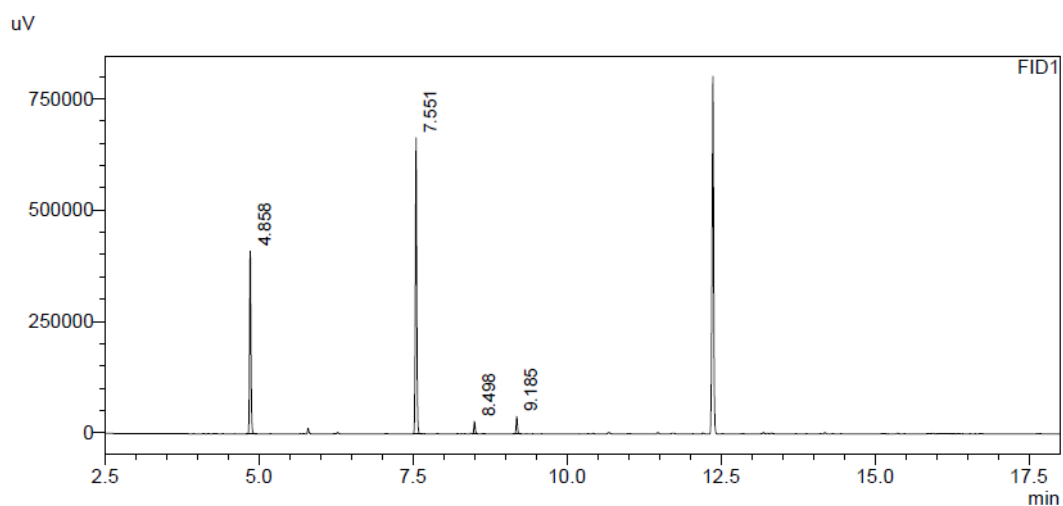

FID1

| Peak# | Ret. Time | Area    | Area%   |
|-------|-----------|---------|---------|
| 1     | 4.858     | 638621  | 36.060  |
| 2     | 7.551     | 1036352 | 58.518  |
| 3     | 8.498     | 39317   | 2.220   |
| 4     | 9.185     | 56703   | 3.202   |
| Total |           | 1770993 | 100.000 |

Sample Name : t=72\_SOD\_669  
 Sample ID :  
 Data Filename : t=72\_SOD\_669.gcd  
 Method Filename : Methode\_Achiral\_MUC\_Integration.gcm  
 Batch Filename : batch.gcb  
 Vial # : 2  
 Injection Volume : 5 uL  
 Date Acquired : 06.04.2019 12:45:44  
 Date Processed : 06.04.2019 13:06:27

uV

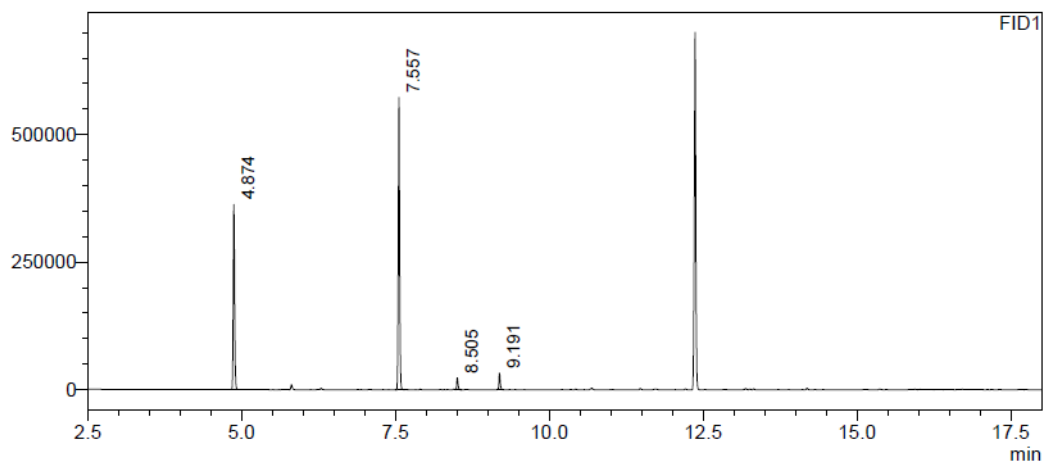

FID1

| Peak# | Ret. Time | Area    | Area%   |
|-------|-----------|---------|---------|
| 1     | 4.874     | 563314  | 37.288  |
| 2     | 7.557     | 867799  | 57.443  |
| 3     | 8.505     | 32847   | 2.174   |
| 4     | 9.191     | 46750   | 3.095   |
| Total |           | 1510711 | 100.000 |

**Entry 2**  
**t = 0 min**

Sample Name : t=0\_SOD\_479  
Sample ID :  
Data Filename : t=0\_SOD\_479.gcd  
Method Filename : Methode\_Achiral\_MUC\_Integration.gcm  
Batch Filename : batch.gcb  
Vial # : 12  
Injection Volume : 5 uL  
Date Acquired : 22.01.2019 21:12:39  
Date Processed : 22.01.2019 21:33:23

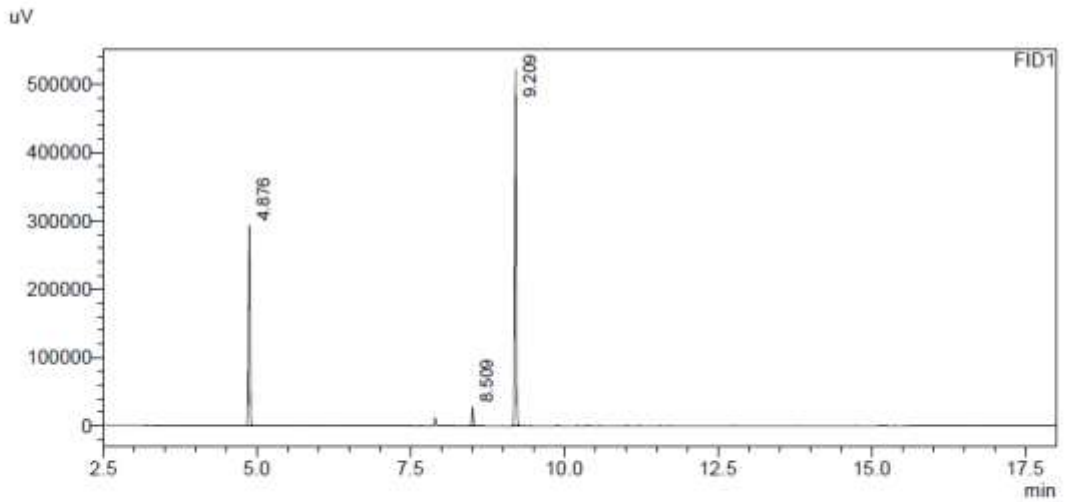

FID1

| Peak# | Ret. Time | Area    | Area%   |
|-------|-----------|---------|---------|
| 1     | 4.876     | 458895  | 35.207  |
| 2     | 8.509     | 39266   | 3.013   |
| 3     | 9.209     | 805242  | 61.780  |
| Total |           | 1303403 | 100.000 |

Sample Name : t=0\_SOD\_670  
Sample ID :  
Data Filename : t=0\_SOD\_670.gcd  
Method Filename : Methode\_Achiral\_MUC\_Integration.gcm  
Batch Filename : batch.gcb  
Vial # : 36  
Injection Volume : 5 uL  
Date Acquired : 03.04.2019 02:06:04  
Date Processed : 03.04.2019 02:26:48

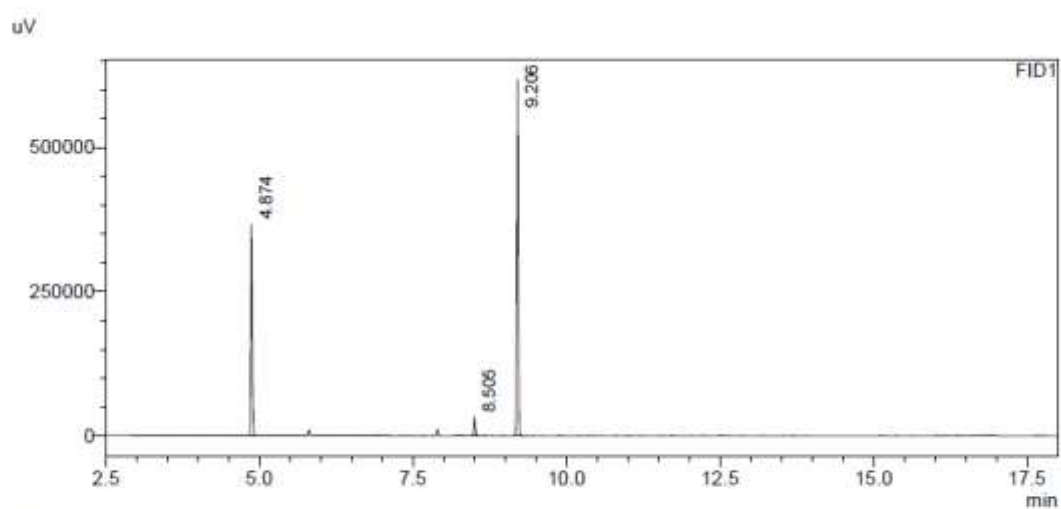

FID1

| Peak# | Ret. Time | Area    | Area%   |
|-------|-----------|---------|---------|
| 1     | 4.874     | 571473  | 35.699  |
| 2     | 8.505     | 46423   | 2.900   |
| 3     | 9.206     | 982918  | 61.401  |
| Total |           | 1600814 | 100.000 |

Sample Name : t=0\_SOD\_671  
Sample ID :  
Data Filename : t=0\_SOD\_671.gcd  
Method Filename : Methode\_Achiral\_MUC\_Integration.gcm  
Batch Filename : batch.gcb  
Vial # : 37  
Injection Volume : 5 uL  
Date Acquired : 03.04.2019 02:31:26  
Date Processed : 03.04.2019 02:52:10

uV

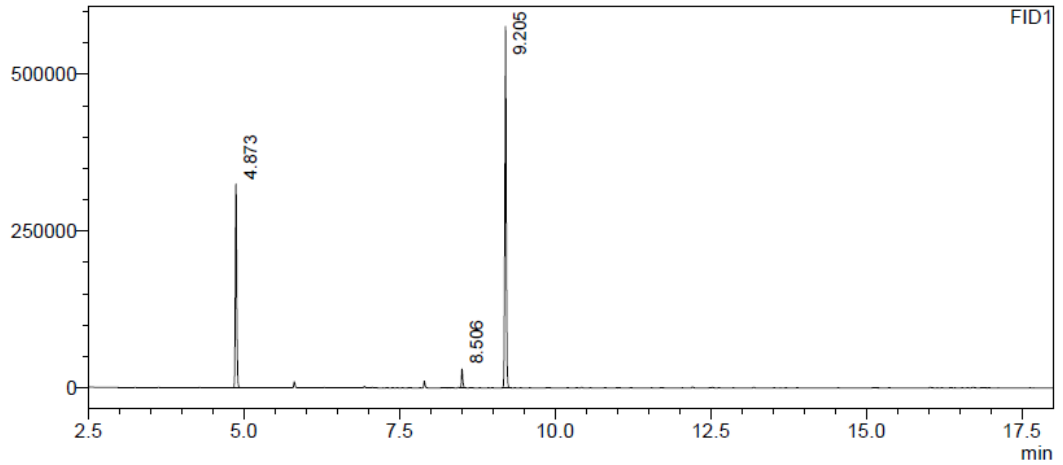

FID1

| Peak# | Ret. Time | Area    | Area%   |
|-------|-----------|---------|---------|
| 1     | 4.873     | 505009  | 35.033  |
| 2     | 8.506     | 42849   | 2.972   |
| 3     | 9.205     | 893664  | 61.994  |
| Total |           | 1441522 | 100.000 |



t = 24 h

Sample Name : t=24\_SOD\_479  
Sample ID :  
Data Filename : t=24\_SOD\_479.gcd  
Method Filename : Methode\_Achiral\_MUC\_Integration.gcm  
Batch Filename : batch.gcb  
Vial # : 64  
Injection Volume : 5 uL  
Date Acquired : 23.01.2019 20:53:27  
Date Processed : 23.01.2019 21:14:10

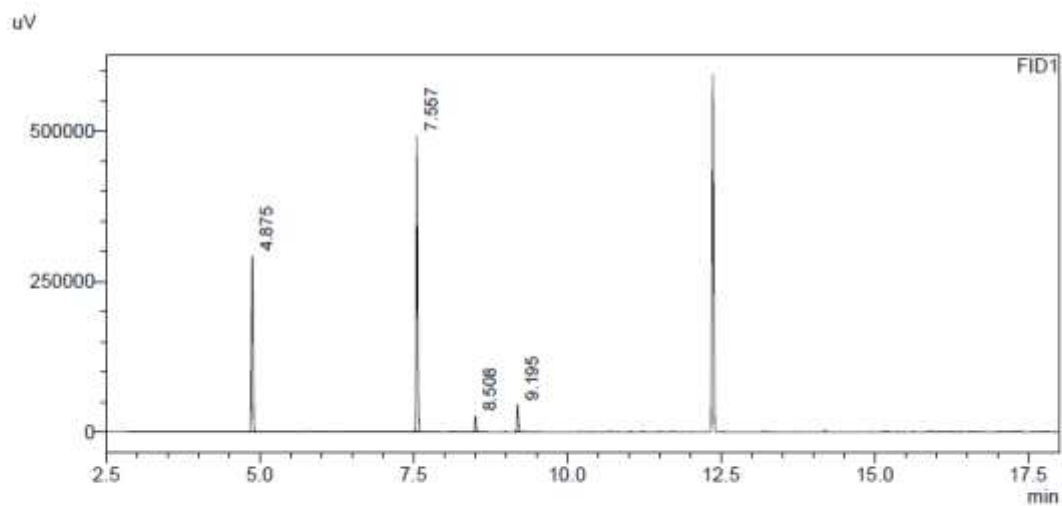

FID1

| Peak# | Ret. Time | Area    | Area%   |
|-------|-----------|---------|---------|
| 1     | 4.875     | 462073  | 35.495  |
| 2     | 7.557     | 736838  | 56.601  |
| 3     | 8.508     | 37956   | 2.916   |
| 4     | 9.195     | 64948   | 4.989   |
| Total |           | 1301816 | 100.000 |

Sample Name : t-24\_SOD\_670  
 Sample ID :  
 Data Filename : t-24\_SOD\_670.gcd  
 Method Filename : Methode\_Achiral\_MUC\_Integration.gcm  
 Batch Filename : batch.gcb  
 Vial # : 86  
 Injection Volume : 5 uL  
 Date Acquired : 04.04.2019 11:30:10  
 Date Processed : 04.04.2019 11:50:53

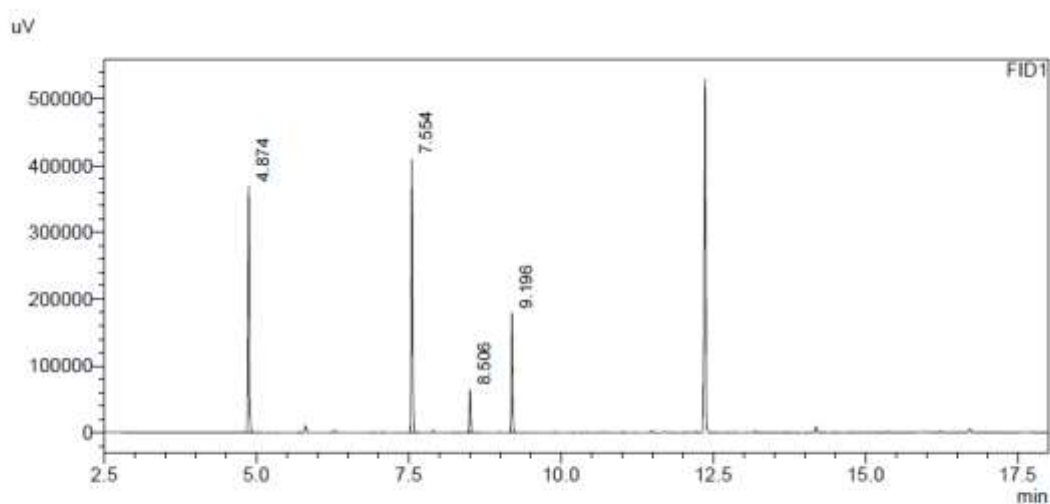

FID1

| Peak# | Ret. Time | Area    | Area%   |
|-------|-----------|---------|---------|
| 1     | 4.874     | 578930  | 37.847  |
| 2     | 7.554     | 605607  | 39.591  |
| 3     | 8.506     | 90412   | 5.911   |
| 4     | 9.196     | 254715  | 16.652  |
| Total |           | 1529664 | 100.000 |

Sample Name : t=24\_SOD\_671  
Sample ID :  
Data Filename : t=24\_SOD\_671.gcd  
Method Filename : Methode\_Achirai\_MUC\_Integration.gcm  
Batch Filename : batch.gcb  
Vial # : 87  
Injection Volume : 5 uL  
Date Acquired : 04.04.2019 11:55:36  
Date Processed : 04.04.2019 12:16:19

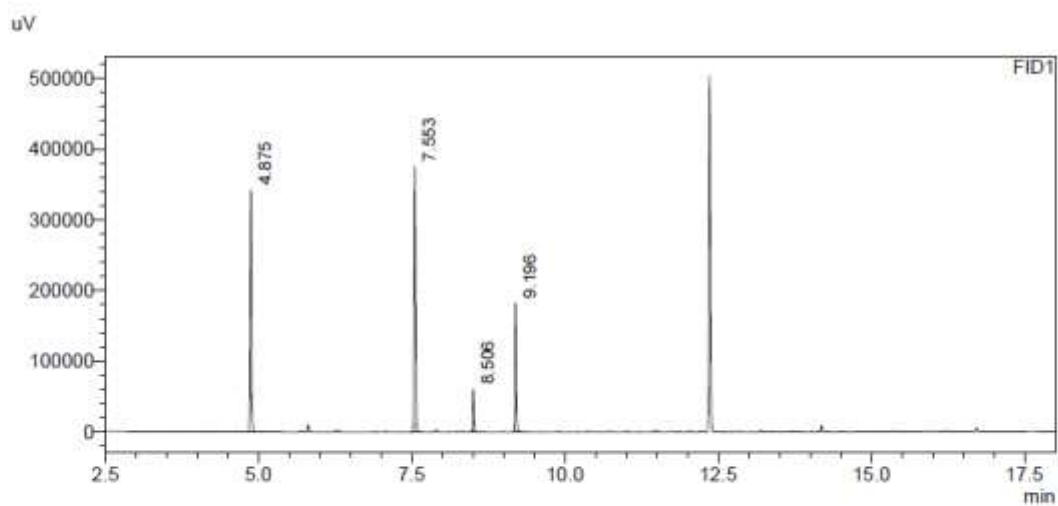

FID1

| Peak# | Ret. Time | Area    | Area%   |
|-------|-----------|---------|---------|
| 1     | 4.875     | 530468  | 36.889  |
| 2     | 7.553     | 560791  | 38.998  |
| 3     | 8.506     | 84903   | 5.904   |
| 4     | 9.196     | 261830  | 18.208  |
| Total |           | 1437993 | 100.000 |

t = 48 h

Sample Name : t=48\_SOD\_479  
Sample ID :  
Data Filename : t=48\_SOD\_479.gcd  
Method Filename : Methode\_Achiral\_MUC\_Integration.gcm  
Batch Filename : batch.gcb  
Vial # : 116  
Injection Volume : 5 uL  
Date Acquired : 25.01.2019 02:47:04  
Date Processed : 25.01.2019 03:07:48

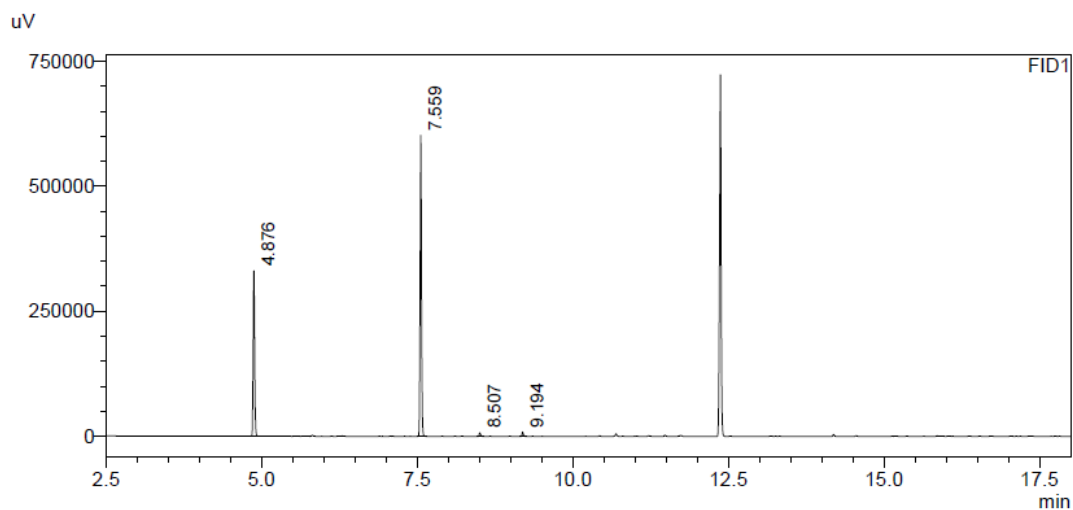

FID1

| Peak# | Ret. Time | Area    | Area%   |
|-------|-----------|---------|---------|
| 1     | 4.876     | 527683  | 36.048  |
| 2     | 7.559     | 913948  | 62.435  |
| 3     | 8.507     | 10275   | 0.702   |
| 4     | 9.194     | 11926   | 0.815   |
| Total |           | 1463833 | 100.000 |

Sample Name : t=48\_SOD\_670  
Sample ID :  
Data Filename : t=48\_SOD\_670.gcd  
Method Filename : Methode\_Achiral\_MUC\_Integration.gcm  
Batch Filename : batch.gcb  
Vial # : 116  
Injection Volume : 5 uL  
Date Acquired : 05.04.2019 00:13:22  
Date Processed : 05.04.2019 00:34:06

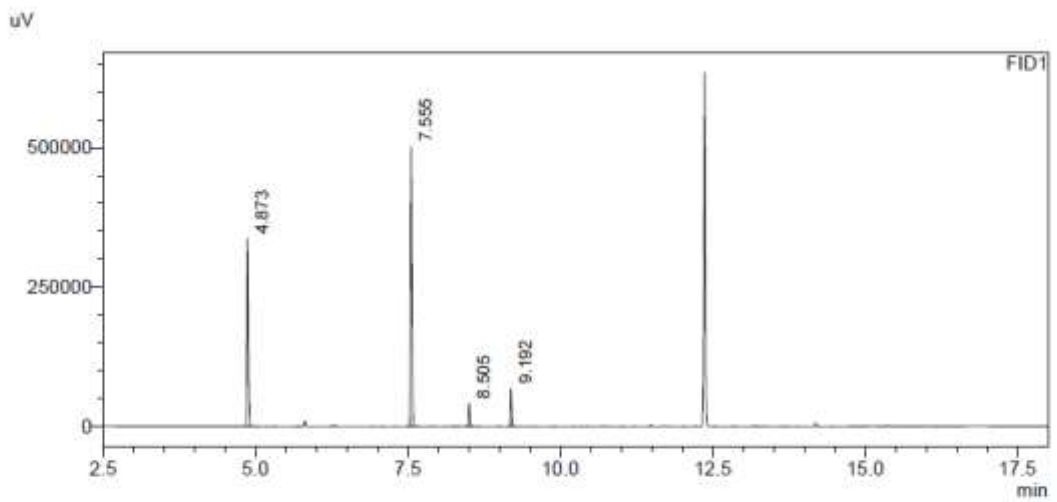

| Peak# | Ret. Time | Area    | Area%   |
|-------|-----------|---------|---------|
| 1     | 4.873     | 528568  | 36.675  |
| 2     | 7.555     | 754781  | 52.371  |
| 3     | 8.505     | 58612   | 4.067   |
| 4     | 9.192     | 99259   | 6.887   |
| Total |           | 1441219 | 100.000 |

Sample Name : t=48\_SOD\_671  
Sample ID :  
Data Filename : t=48\_SOD\_671.gcd  
Method Filename : Methode\_Achiral\_MUC\_Integration.gcm  
Batch Filename : batch.gcb  
Vial # : 117  
Injection Volume : 5 uL  
Date Acquired : 05.04.2019 00:38:46  
Date Processed : 05.04.2019 00:59:29

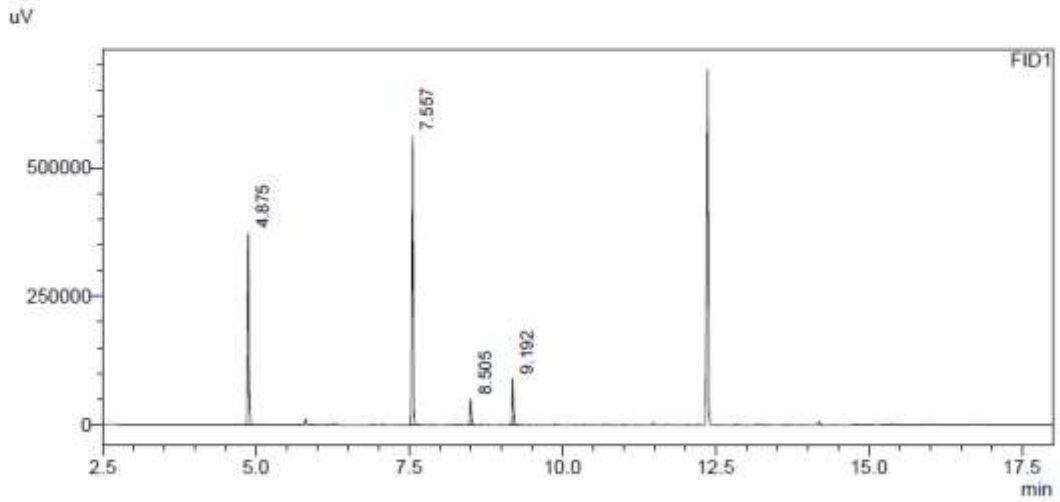

FID1

| Peak# | Ret. Time | Area    | Area%   |
|-------|-----------|---------|---------|
| 1     | 4.875     | 591181  | 35.844  |
| 2     | 7.557     | 860039  | 52.145  |
| 3     | 8.505     | 69983   | 4.243   |
| 4     | 9.192     | 128130  | 7.769   |
| Total |           | 1649333 | 100.000 |

t = 72 h

Sample Name : t=72\_SOD\_479  
Sample ID :  
Data Filename : t=72\_SOD\_479.gcd  
Method Filename : Methode\_Achiral\_MUC\_Integration.gcm  
Batch Filename : batch.gcb  
Vial # : 4  
Injection Volume : 5 uL  
Date Acquired : 25.01.2019 17:34:28  
Date Processed : 25.01.2019 17:55:12

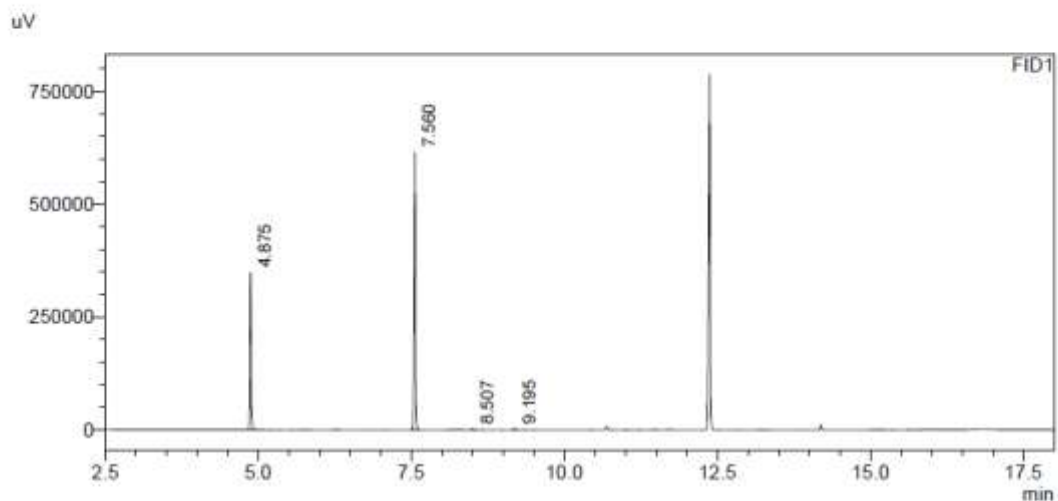

| Peak# | Ret. Time | Area    | Area%   |
|-------|-----------|---------|---------|
| 1     | 4.875     | 546510  | 36.004  |
| 2     | 7.560     | 963319  | 63.463  |
| 3     | 8.507     | 3875    | 0.255   |
| 4     | 9.195     | 4211    | 0.277   |
| Total |           | 1517915 | 100.000 |

Sample Name : t=72\_SOD\_670  
Sample ID :  
Data Filename : t=72\_SOD\_670.gcd  
Method Filename : Methode\_Achiral\_MUC\_Integration.gcm  
Batch Filename : batch.gcb  
Vial # : 3  
Injection Volume : 5 uL  
Date Acquired : 06.04.2019 13:11:10  
Date Processed : 06.04.2019 13:31:55

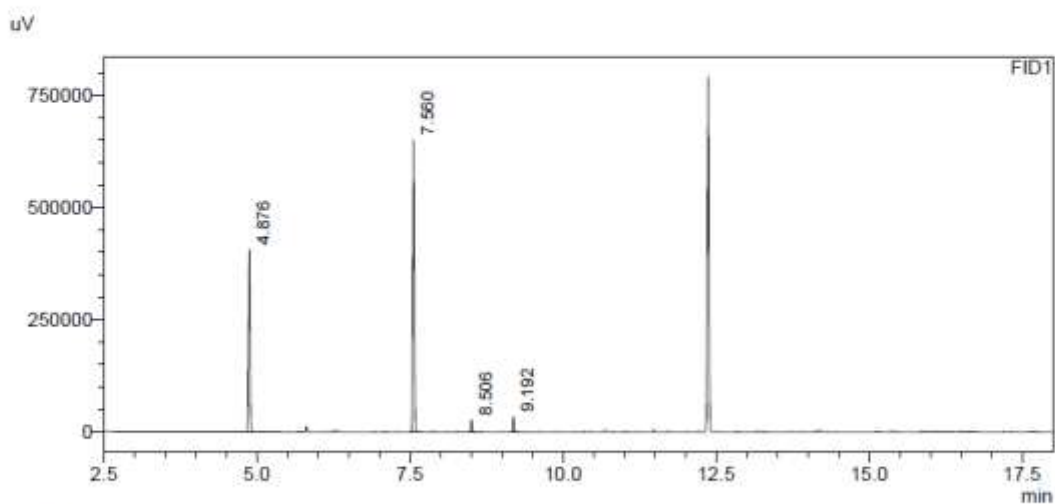

FID1

| Peak# | Ret. Time | Area    | Area%   |
|-------|-----------|---------|---------|
| 1     | 4.876     | 642259  | 36.801  |
| 2     | 7.560     | 1016331 | 58.236  |
| 3     | 8.506     | 37563   | 2.152   |
| 4     | 9.192     | 49047   | 2.810   |
| Total |           | 1745200 | 100.000 |



Sample Name : t=72\_SOD\_671  
 Sample ID :  
 Data Filename : t=72\_SOD\_671.gcd  
 Method Filename : Methode\_Achiral\_MUC\_Integration.gcm  
 Batch Filename : batch.gcb  
 Vial # : 4  
 Injection Volume : 5 uL  
 Date Acquired : 06.04.2019 13:36:36  
 Date Processed : 06.04.2019 13:57:19

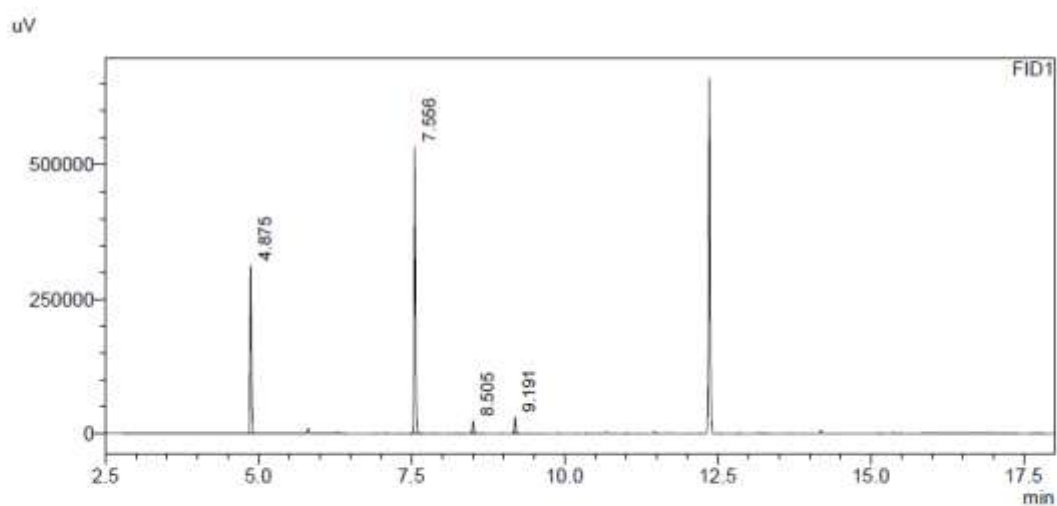

FID1

| Peak# | Ret. Time | Area    | Area%   |
|-------|-----------|---------|---------|
| 1     | 4.875     | 490433  | 35.839  |
| 2     | 7.556     | 801109  | 58.543  |
| 3     | 8.505     | 32973   | 2.410   |
| 4     | 9.191     | 43903   | 3.208   |
| Total |           | 1368419 | 100.000 |

**Entry 3**  
**t = 0 min**

Sample Name : t=0\_SOD\_655  
Sample ID :  
Data Filename : t=0\_SOD\_655.gcd  
Method Filename : Methode\_Achiral\_MUC\_Integration.gcm  
Batch Filename : batch.gcb  
Vial # : 12  
Injection Volume : 5 uL  
Date Acquired : 25.03.2019 18:52:12  
Date Processed : 25.03.2019 19:12:56

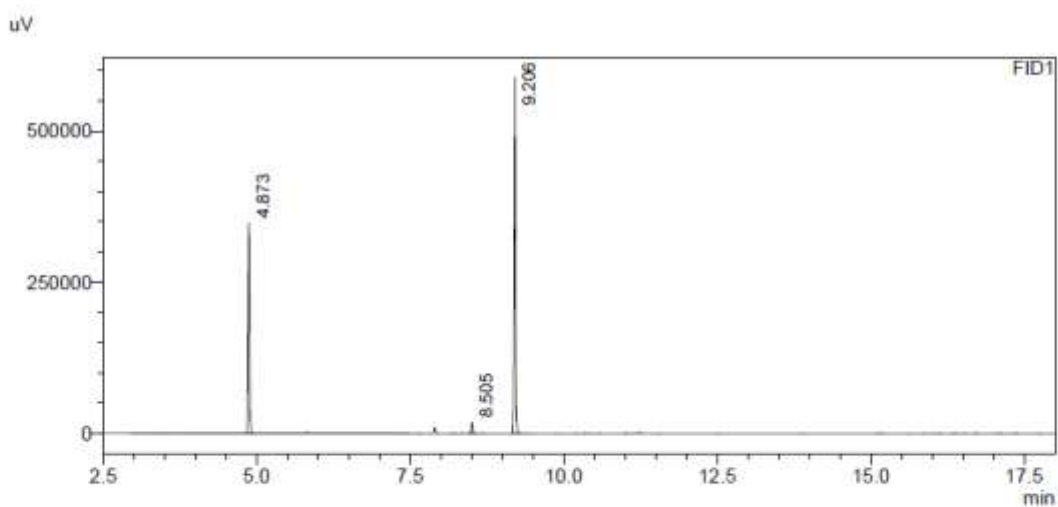

| Peak# | Ret. Time | Area    | Area%   |
|-------|-----------|---------|---------|
| 1     | 4.873     | 544152  | 36.409  |
| 2     | 8.505     | 27082   | 1.812   |
| 3     | 9.206     | 923334  | 61.779  |
| Total |           | 1494567 | 100.000 |

Sample Name : t=0\_SOD\_672  
Sample ID :  
Data Filename : t=0\_SOD\_672.gcd  
Method Filename : Methode\_Achiral\_MUC\_Integration.gcm  
Batch Filename : batch.gcb  
Vial # : 38  
Injection Volume : 5 uL  
Date Acquired : 03.04.2019 02:56:49  
Date Processed : 03.04.2019 03:17:34

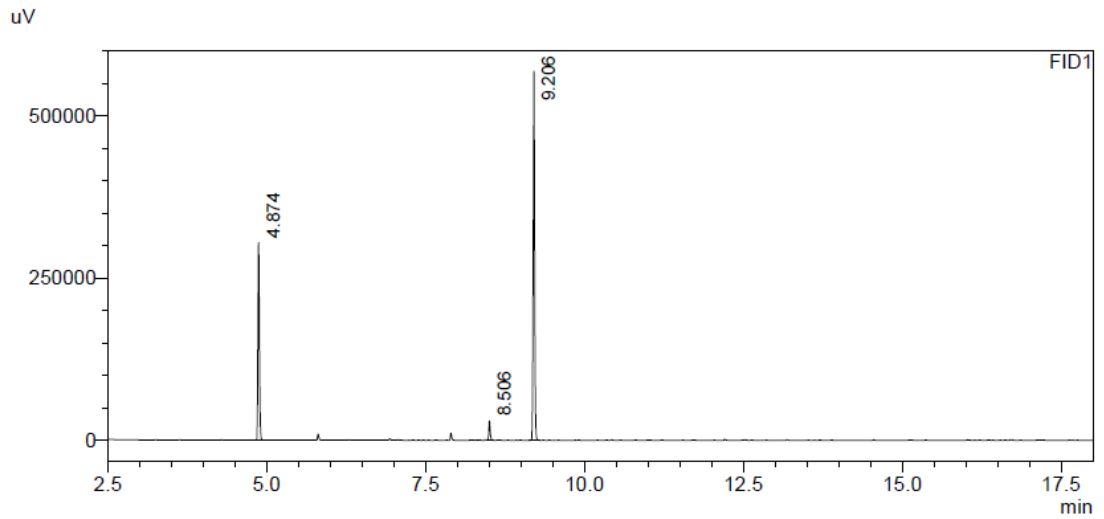

FID1

| Peak# | Ret. Time | Area    | Area%   |
|-------|-----------|---------|---------|
| 1     | 4.874     | 484457  | 33.991  |
| 2     | 8.506     | 42860   | 3.007   |
| 3     | 9.206     | 897918  | 63.001  |
| Total |           | 1425236 | 100.000 |

Sample Name : t=0\_SOD\_673  
Sample ID :  
Data Filename : t=0\_SOD\_673.gcd  
Method Filename : Methode\_Achiral\_MUC\_Integration.gcm  
Batch Filename : batch.gcb  
Vial # : 39  
Injection Volume : 5 uL  
Date Acquired : 03.04.2019 03:22:10  
Date Processed : 03.04.2019 03:42:54

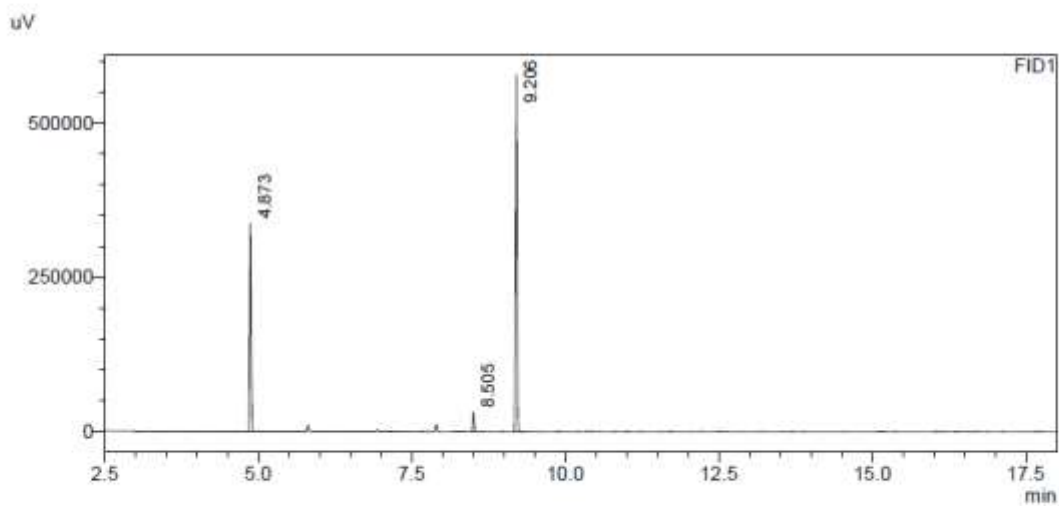

FID1

| Peak# | Ret. Time | Area    | Area%   |
|-------|-----------|---------|---------|
| 1     | 4.873     | 524952  | 35.471  |
| 2     | 8.505     | 42963   | 2.903   |
| 3     | 9.206     | 912049  | 61.626  |
| Total |           | 1479964 | 100.000 |

t = 24 h

Sample Name : t=24\_SOD\_655  
Sample ID :  
Data Filename : t=24\_SOD\_655.gcd  
Method Filename : Methode\_Achiral\_MUC\_Integration.gcm  
Batch Filename : batch.gcb  
Vial # : 2  
Injection Volume : 5 uL  
Date Acquired : 26.03.2019 18:45:56  
Date Processed : 26.03.2019 19:06:40

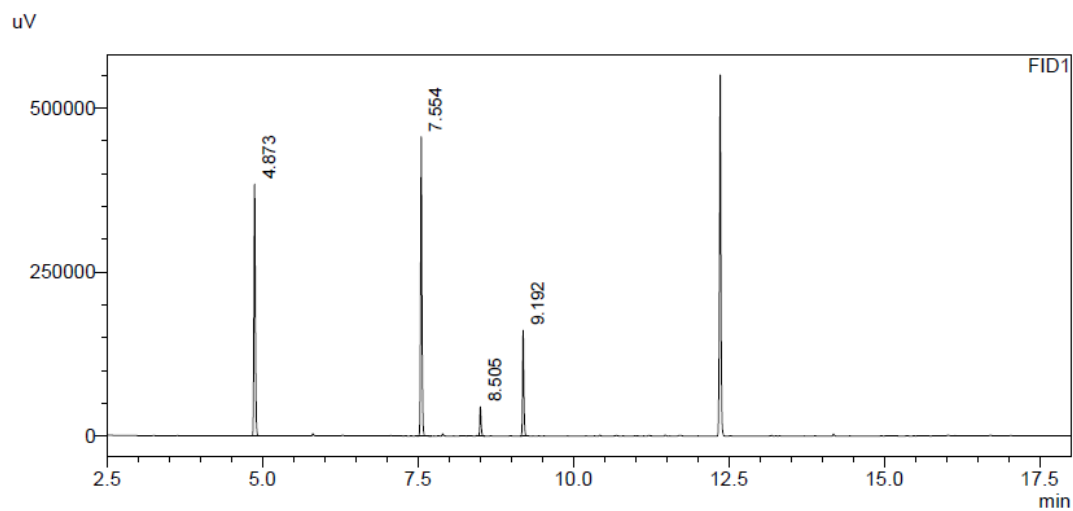

FID1

| Peak# | Ret. Time | Area    | Area%   |
|-------|-----------|---------|---------|
| 1     | 4.873     | 605592  | 38.466  |
| 2     | 7.554     | 676692  | 42.982  |
| 3     | 8.505     | 63326   | 4.022   |
| 4     | 9.192     | 228745  | 14.529  |
| Total |           | 1574355 | 100.000 |

Sample Name : t=24\_SOD\_672  
Sample ID :  
Data Filename : t=24\_SOD\_672.gcd  
Method Filename : Methode\_Achiral\_MUC\_Integration.gcm  
Batch Filename : batch.gcb  
Vial # : 88  
Injection Volume : 5 uL  
Date Acquired : 04.04.2019 12:21:04  
Date Processed : 04.04.2019 12:41:47

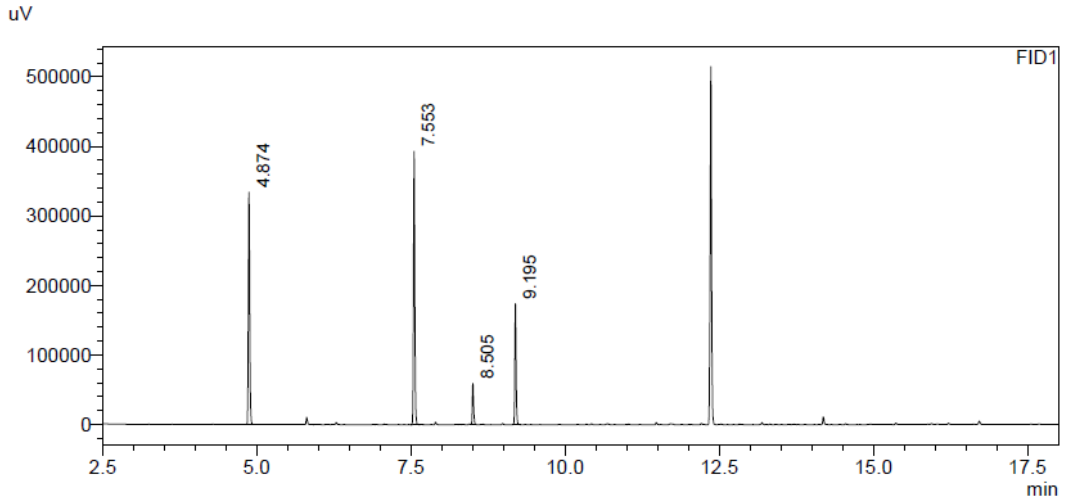

FID1

| Peak# | Ret. Time | Area    | Area%   |
|-------|-----------|---------|---------|
| 1     | 4.874     | 527133  | 36.636  |
| 2     | 7.553     | 577885  | 40.163  |
| 3     | 8.505     | 83841   | 5.827   |
| 4     | 9.195     | 249983  | 17.374  |
| Total |           | 1438841 | 100.000 |

Sample Name : t=24\_SOD\_673  
 Sample ID :  
 Data Filename : t=24\_SOD\_673.gcd  
 Method Filename : Methode\_Achiral\_MUC\_Integration.gcm  
 Batch Filename : batch.gcb  
 Vial # : 89  
 Injection Volume : 5 uL  
 Date Acquired : 04.04.2019 12:46:34  
 Date Processed : 04.04.2019 13:07:18

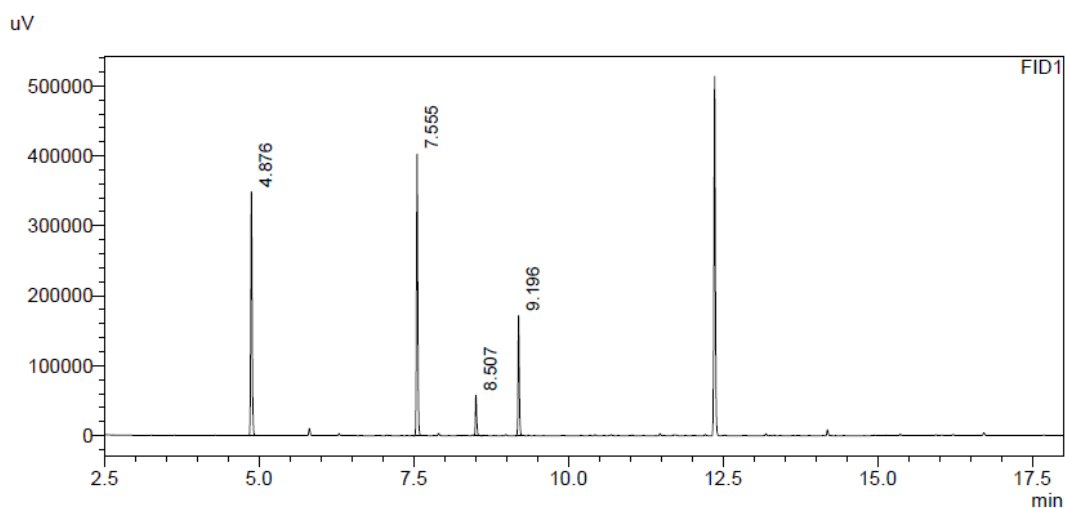

FID1

| Peak# | Ret. Time | Area    | Area%   |
|-------|-----------|---------|---------|
| 1     | 4.876     | 546891  | 37.355  |
| 2     | 7.555     | 593374  | 40.530  |
| 3     | 8.507     | 82391   | 5.628   |
| 4     | 9.196     | 241395  | 16.488  |
| Total |           | 1464051 | 100.000 |

t = 48 h

Sample Name : t=48\_SOD\_655  
Sample ID :  
Data Filename : t=48\_SOD\_655.gcd  
Method Filename : Methode\_Achiral\_MUC\_Integration.gcm  
Batch Filename : batch.gcb  
Vial # : 2  
Injection Volume : 5 uL  
Date Acquired : 27.03.2019 19:52:15  
Date Processed : 27.03.2019 20:12:58

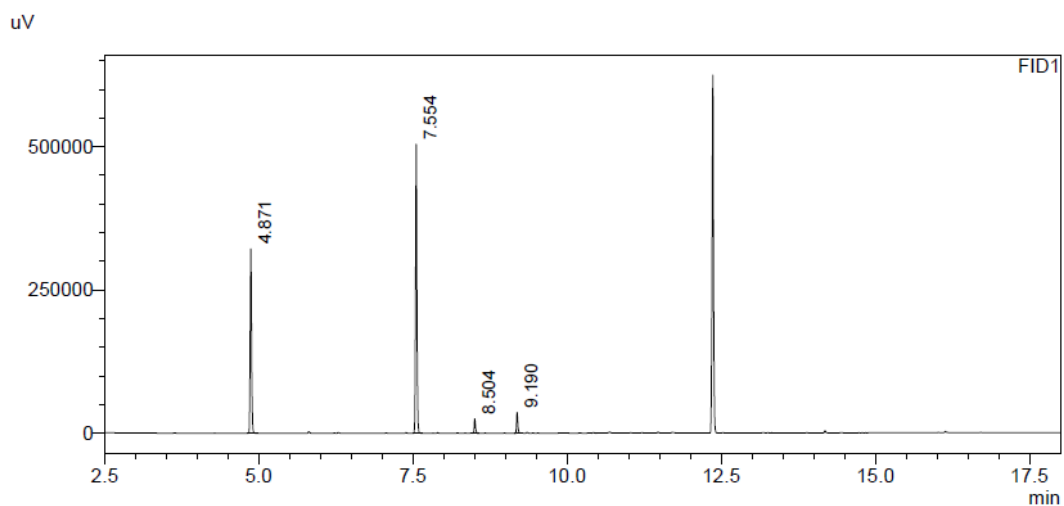

FID1

| Peak# | Ret. Time | Area    | Area%   |
|-------|-----------|---------|---------|
| 1     | 4.871     | 505146  | 37.208  |
| 2     | 7.554     | 765642  | 56.396  |
| 3     | 8.504     | 35125   | 2.587   |
| 4     | 9.190     | 51698   | 3.808   |
| Total |           | 1357611 | 100.000 |



Sample Name : t=48\_SOD\_672  
Sample ID :  
Data Filename : t=48\_SOD\_672.gcd  
Method Filename : Methode\_Achiral\_MUC\_Integration.gcm  
Batch Filename : batch.gcb  
Vial # : 118  
Injection Volume : 5 uL  
Date Acquired : 05.04.2019 01:04:13  
Date Processed : 05.04.2019 01:24:56

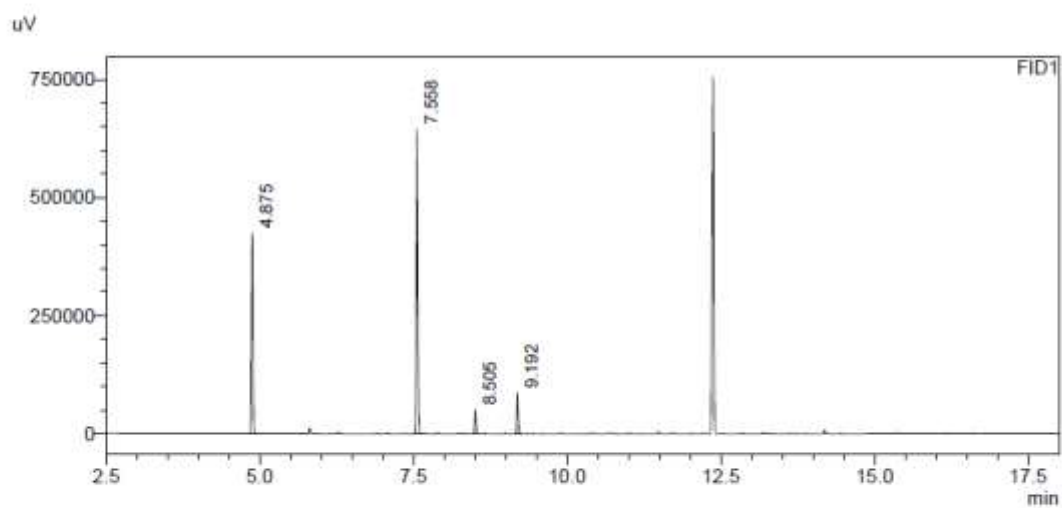

FID1

| Peak# | Ret. Time | Area    | Area%   |
|-------|-----------|---------|---------|
| 1     | 4.875     | 660749  | 35.706  |
| 2     | 7.558     | 994421  | 53.737  |
| 3     | 8.505     | 71294   | 3.853   |
| 4     | 9.192     | 124086  | 6.705   |
| Total |           | 1850550 | 100.000 |

Sample Name : t=48\_SOD\_673  
 Sample ID :  
 Data Filename : t=48\_SOD\_673.god  
 Method Filename : Methode\_Achiral\_MUC\_Integration.gcm  
 Batch Filename : batch.gcb  
 Vial # : 119  
 Injection Volume : 5 uL  
 Date Acquired : 05.04.2019 01:29:36  
 Date Processed : 05.04.2019 01:50:19

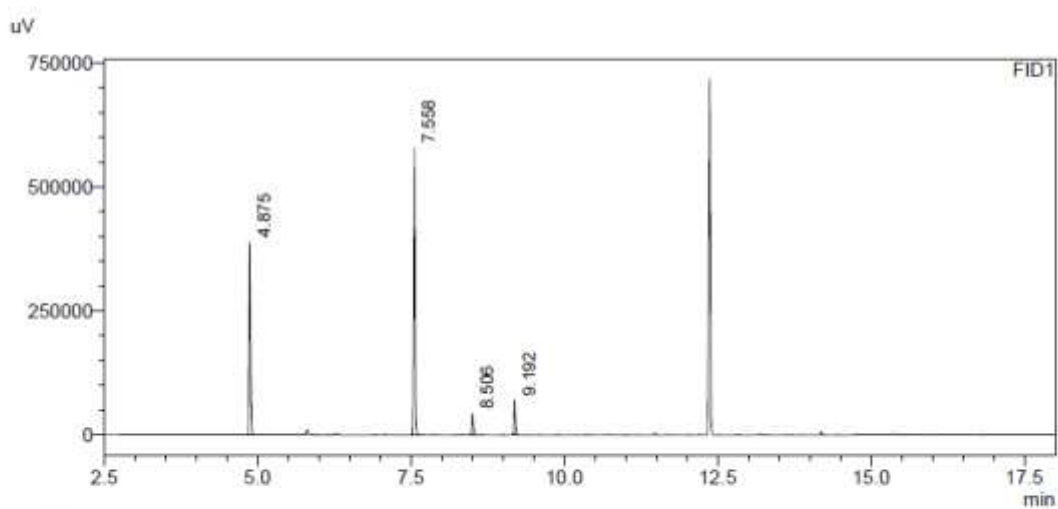

FID1

| Peak# | Ret. Time | Area    | Area%   |
|-------|-----------|---------|---------|
| 1     | 4.875     | 606771  | 36.540  |
| 2     | 7.558     | 892769  | 53.764  |
| 3     | 8.506     | 60192   | 3.625   |
| 4     | 9.192     | 100813  | 6.071   |
| Total |           | 1660546 | 100.000 |

t = 72 h

Sample Name : t=72\_SOD\_655  
Sample ID :  
Data Filename : t=72\_SOD\_655.gcd  
Method Filename : Methode\_Achiral\_MUC\_Integration.gcm  
Batch Filename : batch.gcb  
Vial # : 2  
Injection Volume : 5 uL  
Date Acquired : 28.03.2019 18:05:08  
Date Processed : 28.03.2019 18:25:52

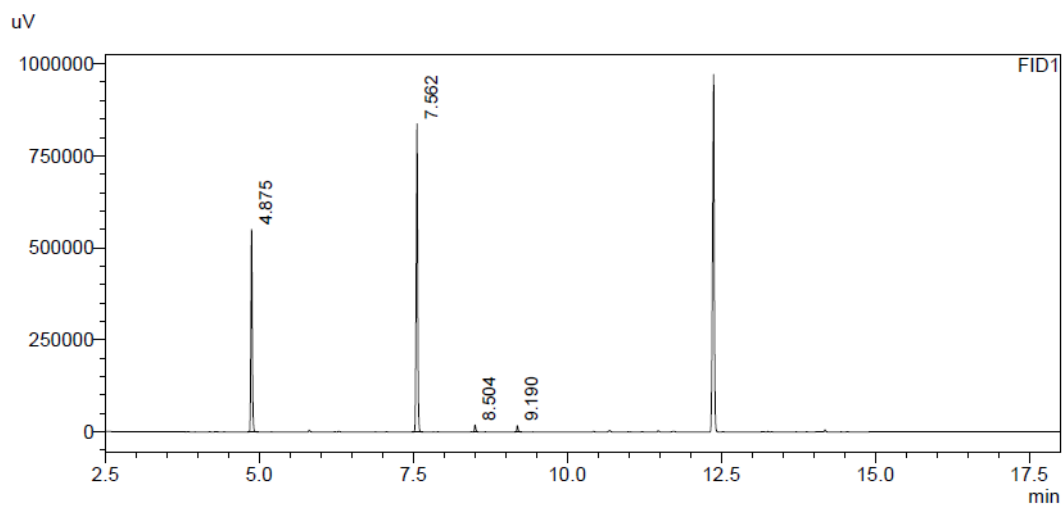

FID1

| Peak# | Ret. Time | Area    | Area%   |
|-------|-----------|---------|---------|
| 1     | 4.875     | 861909  | 37.557  |
| 2     | 7.562     | 1381796 | 60.211  |
| 3     | 8.504     | 26566   | 1.158   |
| 4     | 9.190     | 24645   | 1.074   |
| Total |           | 2294916 | 100.000 |

Sample Name : t=72\_SOD\_672  
Sample ID :  
Data Filename : t=72\_SOD\_672.gcd  
Method Filename : Methode\_Achiral\_MUC\_Integration.gcm  
Batch Filename : batch.gcb  
Vial # : 5  
Injection Volume : 5 uL  
Date Acquired : 06.04.2019 14:02:00  
Date Processed : 06.04.2019 14:22:45

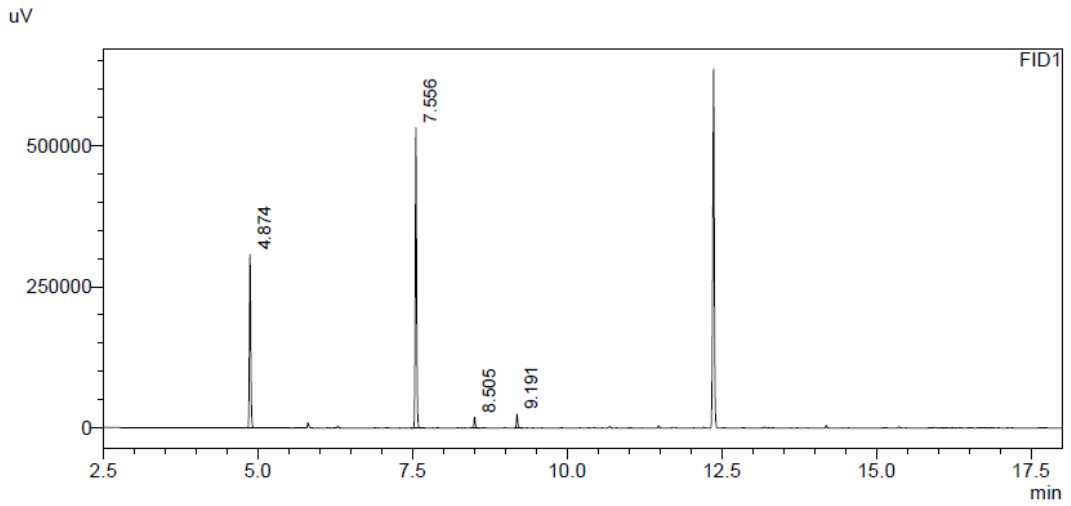

FID1

| Peak# | Ret. Time | Area    | Area%   |
|-------|-----------|---------|---------|
| 1     | 4.874     | 478933  | 35.880  |
| 2     | 7.556     | 792717  | 59.388  |
| 3     | 8.505     | 27361   | 2.050   |
| 4     | 9.191     | 35790   | 2.681   |
| Total |           | 1334801 | 100.000 |

Sample Name : t=72\_SOD\_673  
 Sample ID :  
 Data Filename : t=72\_SOD\_673.gcd  
 Method Filename : Methode\_Achiral\_MUC\_Integration.gcm  
 Batch Filename : batch.gcb  
 Vial # : 6  
 Injection Volume : 5 uL  
 Date Acquired : 06.04.2019 14:27:25  
 Date Processed : 06.04.2019 14:48:08

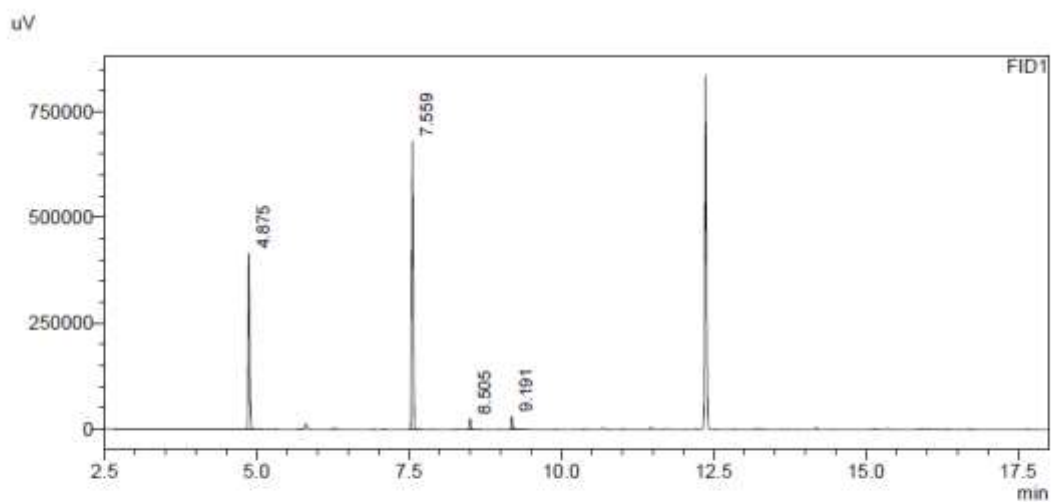

| Peak# | Ret. Time | Area    | Area%   |
|-------|-----------|---------|---------|
| 1     | 4.875     | 658204  | 36.228  |
| 2     | 7.559     | 1078522 | 59.363  |
| 3     | 8.505     | 35696   | 1.965   |
| 4     | 9.191     | 44392   | 2.443   |
| Total |           | 1816813 | 100.000 |

**Entry 4**  
**t = 0 min**

Sample Name : t=0\_SOD\_656  
Sample ID :  
Data Filename : t=0\_SOD\_656.gcd  
Method Filename : Methode\_Achiral\_MUC\_Integration.gcm  
Batch Filename : batch.gcb  
Vial # : 13  
Injection Volume : 5 uL  
Date Acquired : 25.03.2019 19:17:36  
Date Processed : 25.03.2019 19:38:20

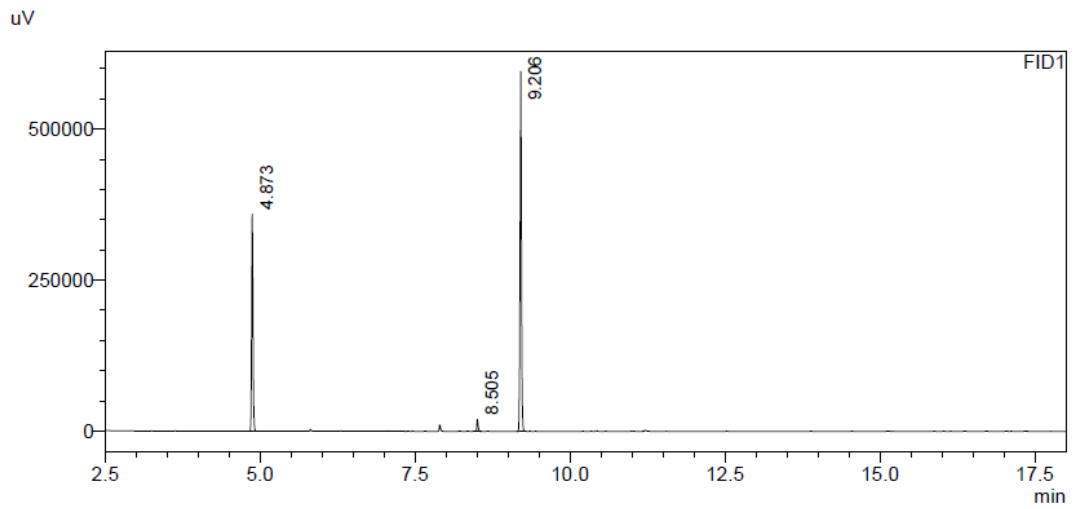

FID1

| Peak# | Ret. Time | Area    | Area%   |
|-------|-----------|---------|---------|
| 1     | 4.873     | 559924  | 36.794  |
| 2     | 8.505     | 28438   | 1.869   |
| 3     | 9.206     | 933428  | 61.338  |
| Total |           | 1521790 | 100.000 |

Sample Name : t=0\_SOD\_674  
Sample ID :  
Data Filename : t=0\_SOD\_674.gcd  
Method Filename : Methode\_Achiral\_MUC\_Integration.gcm  
Batch Filename : batch.gcb  
Vial # : 40  
Injection Volume : 5 uL  
Date Acquired : 03.04.2019 03:47:34  
Date Processed : 03.04.2019 04:08:18

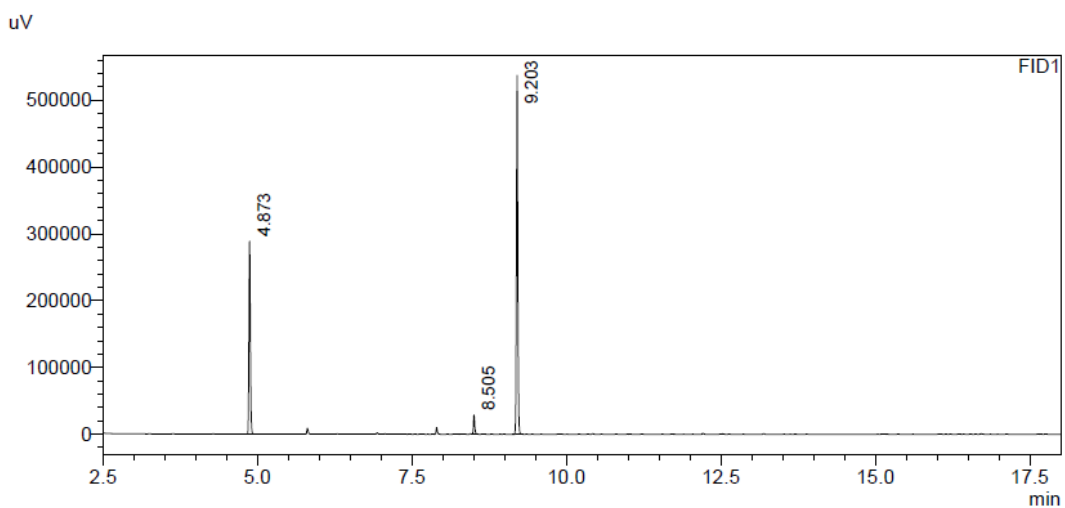

FID1

| Peak# | Ret. Time | Area    | Area%   |
|-------|-----------|---------|---------|
| 1     | 4.873     | 457004  | 34.591  |
| 2     | 8.505     | 40706   | 3.081   |
| 3     | 9.203     | 823473  | 62.328  |
| Total |           | 1321183 | 100.000 |

Sample Name : t=0\_SOD\_675  
Sample ID :  
Data Filename : t=0\_SOD\_675.gcd  
Method Filename : Methode\_Achiral\_MUC\_Integration.gcm  
Batch Filename : batch.gcb  
Vial # : 41  
Injection Volume : 5 uL  
Date Acquired : 03.04.2019 04:12:55  
Date Processed : 03.04.2019 04:33:40

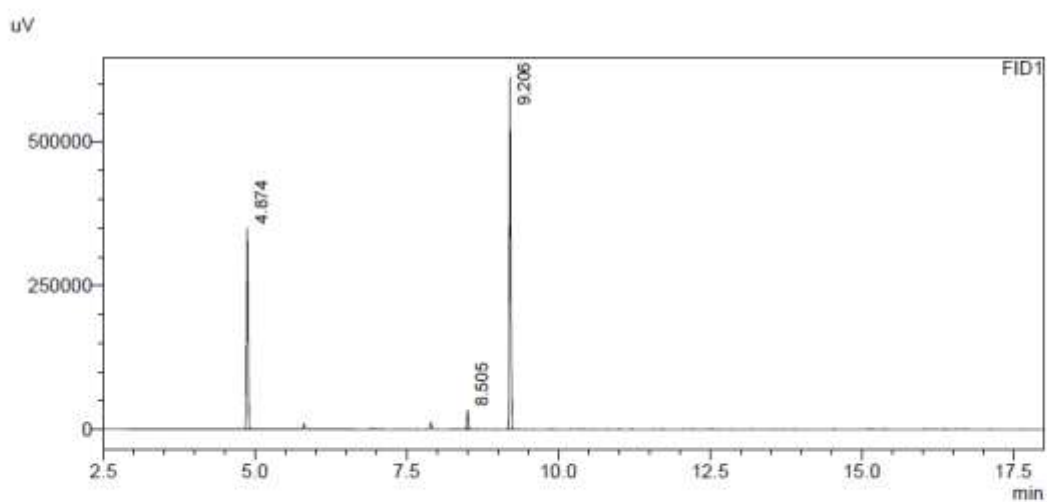

| Peak# | Ret. Time | Area    | Area%   |
|-------|-----------|---------|---------|
| 1     | 4.874     | 548675  | 34.976  |
| 2     | 8.505     | 47035   | 2.998   |
| 3     | 9.206     | 973024  | 62.026  |
| Total |           | 1568734 | 100.000 |



t = 24 h

Sample Name : t=24\_SOD\_656  
Sample ID :  
Data Filename : t=24\_SOD\_656.gcd  
Method Filename : Methode\_Achiral\_MUC\_Integration.gcm  
Batch Filename : batch.gcb  
Vial # : 3  
Injection Volume : 5 uL  
Date Acquired : 26.03.2019 19:11:16  
Date Processed : 26.03.2019 19:32:00

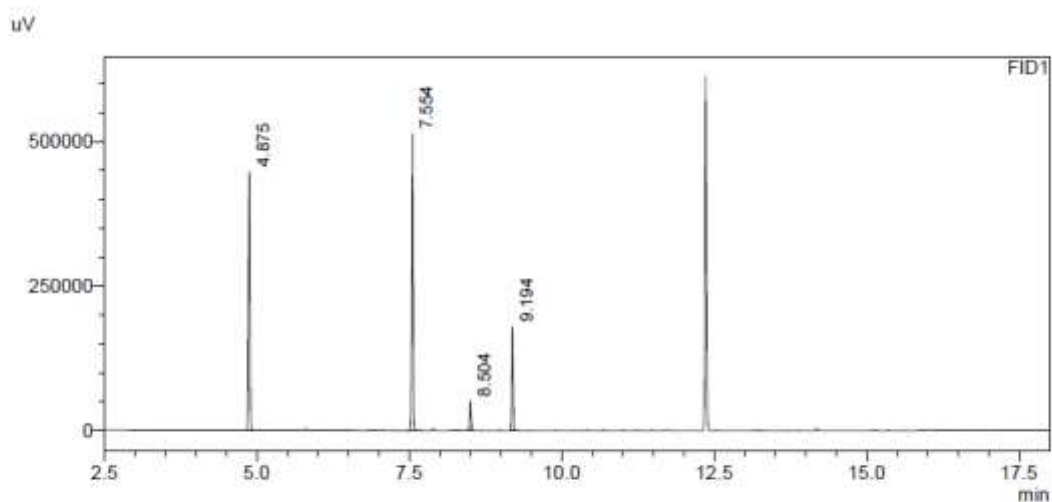

FID1

| Peak# | Ret. Time | Area    | Area%   |
|-------|-----------|---------|---------|
| 1     | 4.875     | 705471  | 39.262  |
| 2     | 7.554     | 764236  | 42.532  |
| 3     | 8.504     | 72229   | 4.020   |
| 4     | 9.194     | 254900  | 14.186  |
| Total |           | 1796836 | 100.000 |

Sample Name : t=24\_SOD\_674  
 Sample ID :  
 Data Filename : t=24\_SOD\_674.gcd  
 Method Filename : Methode\_Achiral\_MUC\_Integration.gcm  
 Batch Filename : batch.gcb  
 Vial # : 90  
 Injection Volume : 5 uL  
 Date Acquired : 04.04.2019 13:11:59  
 Date Processed : 04.04.2019 13:32:44

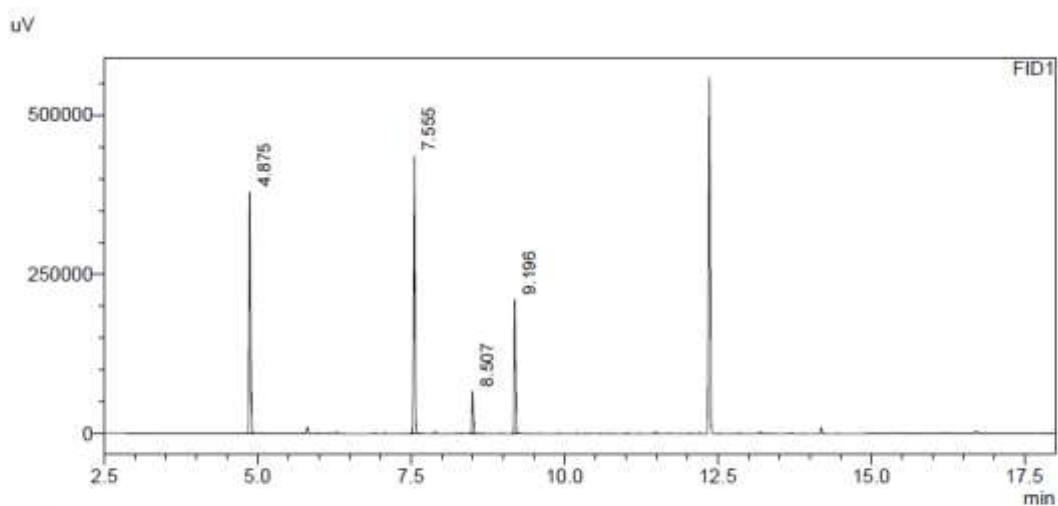

FID1

| Peak# | Ret. Time | Area    | Area%   |
|-------|-----------|---------|---------|
| 1     | 4.875     | 592881  | 36.183  |
| 2     | 7.555     | 653865  | 39.905  |
| 3     | 8.507     | 92565   | 5.649   |
| 4     | 9.196     | 299246  | 18.263  |
| Total |           | 1638557 | 100.000 |

Sample Name : t=24\_SOD\_675  
Sample ID :  
Data Filename : t=24\_SOD\_675.gcd  
Method Filename : Methode\_Achiral\_MUC\_Integration.gcm  
Batch Filename : batch.gcb  
Vial # : 91  
Injection Volume : 5 uL  
Date Acquired : 04.04.2019 13:37:21  
Date Processed : 04.04.2019 13:58:05

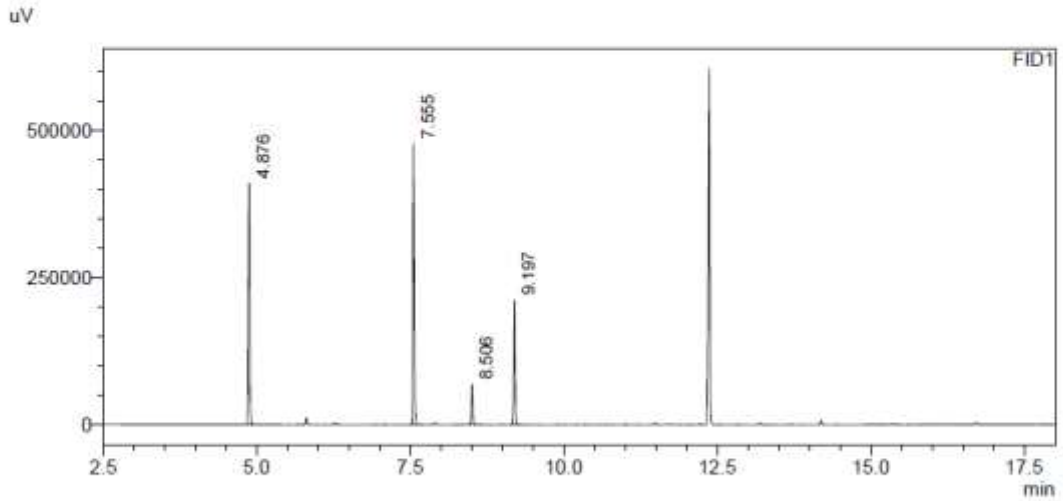

FID1

| Peak# | Ret. Time | Area    | Area%   |
|-------|-----------|---------|---------|
| 1     | 4.876     | 645577  | 36.585  |
| 2     | 7.555     | 719515  | 40.775  |
| 3     | 8.506     | 95797   | 5.429   |
| 4     | 9.197     | 303724  | 17.212  |
| Total |           | 1764613 | 100.000 |

t = 48 h

Sample Name : t=48\_SOD\_656  
Sample ID :  
Data Filename : t=48\_SOD\_656.gcd  
Method Filename : Methode\_Achiral\_MUC\_Integration.gcm  
Batch Filename : batch.gcb  
Vial # : 3  
Injection Volume : 5 uL  
Date Acquired : 27.03.2019 20:17:39  
Date Processed : 27.03.2019 20:38:23

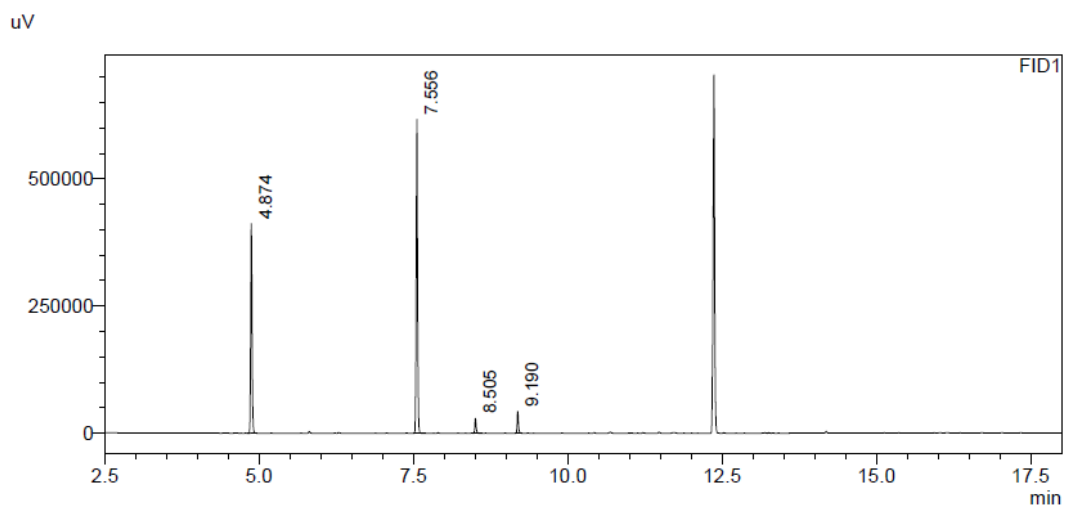

| Peak# | Ret. Time | Area    | Area%   |
|-------|-----------|---------|---------|
| 1     | 4.874     | 652765  | 38.315  |
| 2     | 7.556     | 947189  | 55.597  |
| 3     | 8.505     | 42178   | 2.476   |
| 4     | 9.190     | 61540   | 3.612   |
| Total |           | 1703672 | 100.000 |

Sample Name : t=48\_SOD\_674  
Sample ID :  
Data Filename : t=48\_SOD\_674.gcd  
Method Filename : Methode\_Achiral\_MUC\_Integration.gcm  
Batch Filename : batch.gcb  
Vial # : 120  
Injection Volume : 5 uL  
Date Acquired : 05.04.2019 01:55:05  
Date Processed : 05.04.2019 02:15:48

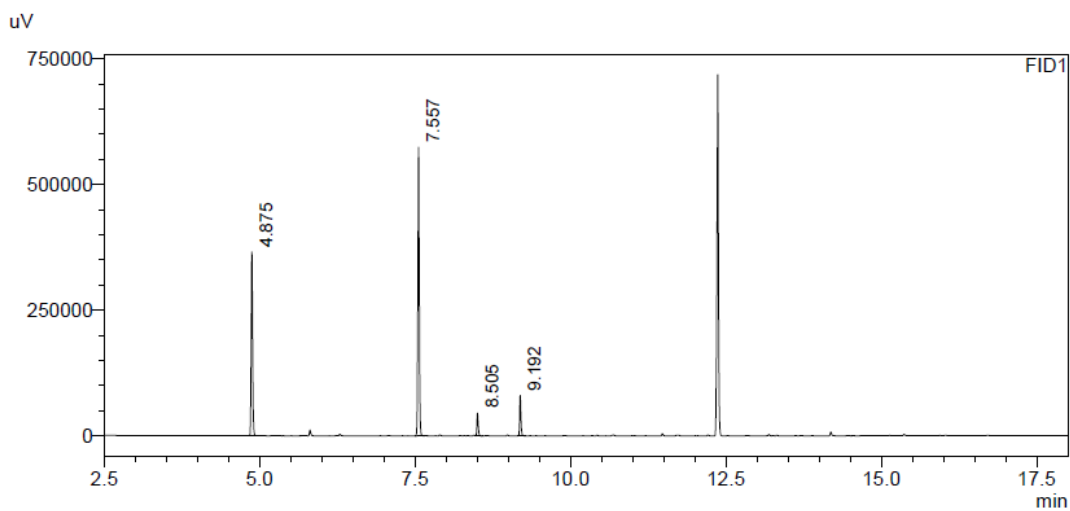

FID1

| Peak# | Ret. Time | Area    | Area%   |
|-------|-----------|---------|---------|
| 1     | 4.875     | 580653  | 35.417  |
| 2     | 7.557     | 880416  | 53.702  |
| 3     | 8.505     | 63757   | 3.889   |
| 4     | 9.192     | 114632  | 6.992   |
| Total |           | 1639458 | 100.000 |

Sample Name : t=48\_SOD\_675  
 Sample ID :  
 Data Filename : t=48\_SOD\_675.god  
 Method Filename : Methode\_Achiral\_MUC\_Integration.gcm  
 Batch Filename : batch.gcb  
 Vial # : 121  
 Injection Volume : 5 uL  
 Date Acquired : 05.04.2019 02:20:30  
 Date Processed : 05.04.2019 02:41:13

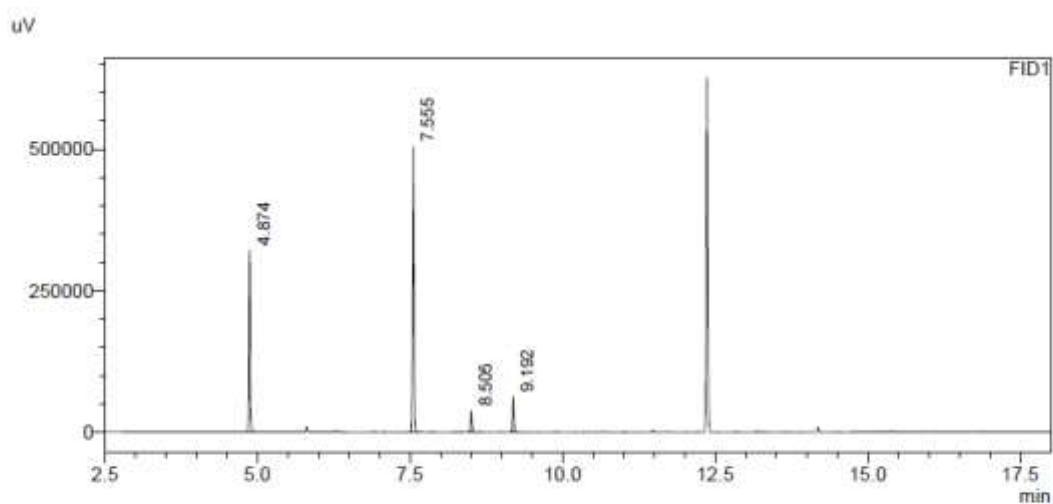

FID1

| Peak# | Ret. Time | Area    | Area%   |
|-------|-----------|---------|---------|
| 1     | 4.874     | 506875  | 35.905  |
| 2     | 7.555     | 761806  | 53.964  |
| 3     | 8.505     | 53030   | 3.756   |
| 4     | 9.192     | 89989   | 6.375   |
| Total |           | 1411700 | 100.000 |

Sample Name : t=48\_SOD\_675  
Sample ID :  
Data Filename : t=48\_SOD\_675.god  
Method Filename : Methode\_Achiral\_MUC\_Integration.gcm  
Batch Filename : batch.gcb  
Vial # : 121  
Injection Volume : 5 uL  
Date Acquired : 05.04.2019 02:20:30  
Date Processed : 05.04.2019 02:41:13



FID1

| Peak# | Ret. Time | Area    | Area%   |
|-------|-----------|---------|---------|
| 1     | 4.874     | 506875  | 35.905  |
| 2     | 7.555     | 761806  | 53.964  |
| 3     | 8.505     | 53030   | 3.756   |
| 4     | 9.192     | 89989   | 6.375   |
| Total |           | 1411700 | 100.000 |

t = 72 h

Sample Name : t=72\_SOD\_656  
Sample ID :  
Data Filename : t=72\_SOD\_656.gcd  
Method Filename : Methode\_Achiral\_MUC\_Integration.gcm  
Batch Filename : batch.gcb  
Vial # : 3  
Injection Volume : 5 uL  
Date Acquired : 28.03.2019 18:30:27  
Date Processed : 28.03.2019 18:51:09

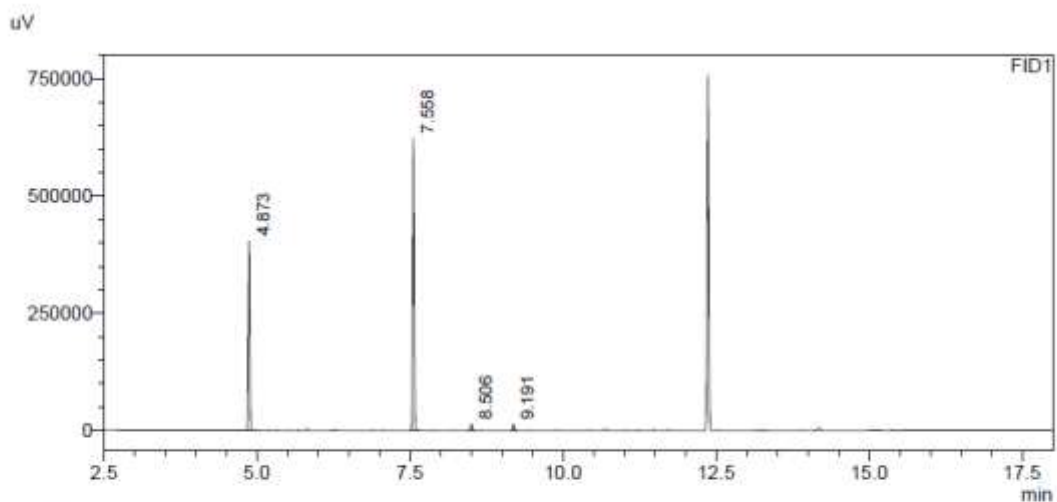

FID1

| Peak# | Ret. Time | Area    | Area%   |
|-------|-----------|---------|---------|
| 1     | 4.873     | 624393  | 38.176  |
| 2     | 7.558     | 972537  | 59.462  |
| 3     | 8.506     | 19626   | 1.200   |
| 4     | 9.191     | 18999   | 1.162   |
| Total |           | 1635555 | 100.000 |



Sample Name : t=72\_SOD\_674  
Sample ID :  
Data Filename : t=72\_SOD\_674.gcd  
Method Filename : Methode\_Achiral\_MUC\_Integration.gcm  
Batch Filename : batch.gcb  
Vial # : 7  
Injection Volume : 5 uL  
Date Acquired : 06.04.2019 14:52:50  
Date Processed : 06.04.2019 15:13:34

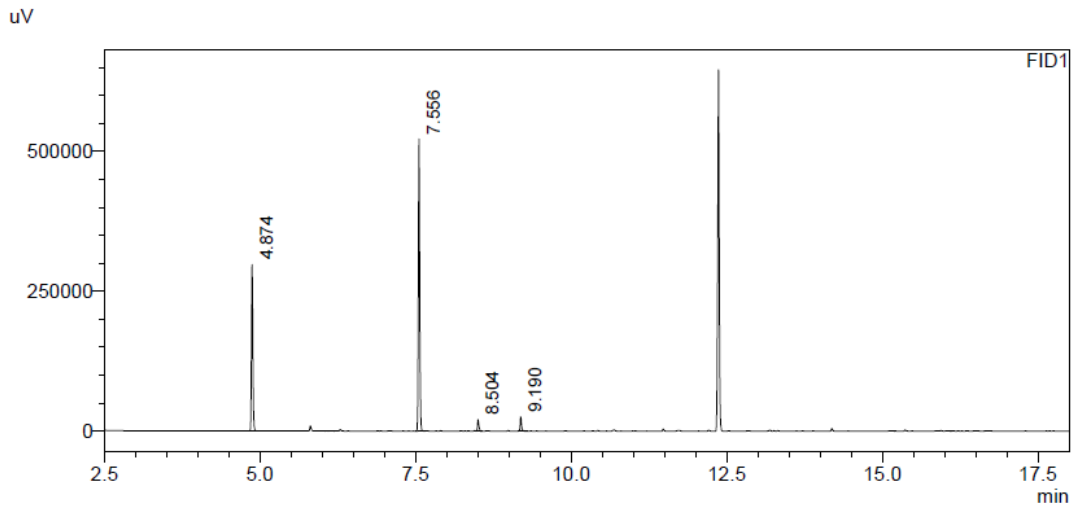

FID1

| Peak# | Ret. Time | Area    | Area%   |
|-------|-----------|---------|---------|
| 1     | 4.874     | 469647  | 35.629  |
| 2     | 7.556     | 782274  | 59.346  |
| 3     | 8.504     | 28628   | 2.172   |
| 4     | 9.190     | 37614   | 2.853   |
| Total |           | 1318163 | 100.000 |

Sample Name : t=72\_SOD\_675  
Sample ID :  
Data Filename : t=72\_SOD\_675.gcd  
Method Filename : Methode\_Achiral\_MUC\_Integration.gcm  
Batch Filename : batch.gcb  
Vial # : 8  
Injection Volume : 5 uL  
Date Acquired : 06.04.2019 15:18:16  
Date Processed : 06.04.2019 15:39:01

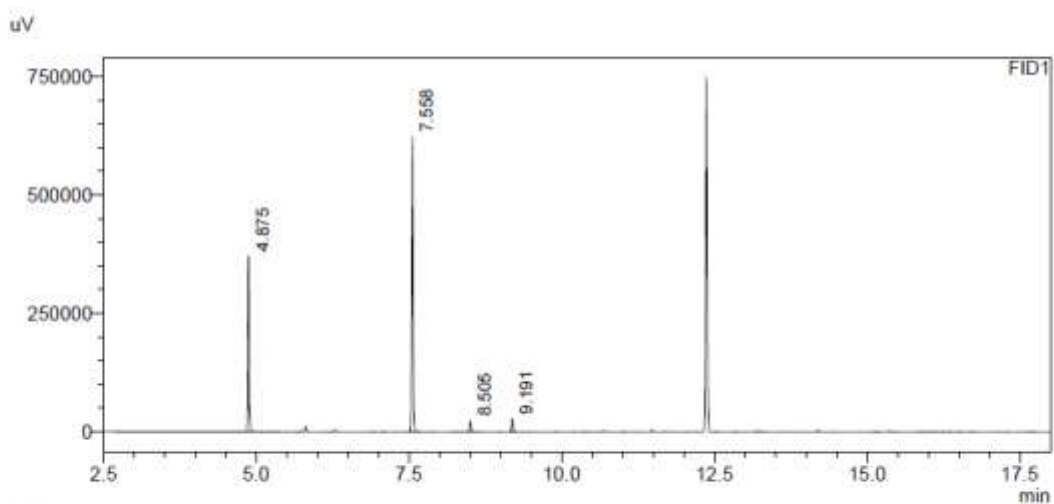

FID1

| Peak# | Ret. Time | Area    | Area%   |
|-------|-----------|---------|---------|
| 1     | 4.875     | 581605  | 35.910  |
| 2     | 7.558     | 965377  | 59.605  |
| 3     | 8.505     | 32052   | 1.979   |
| 4     | 9.191     | 40593   | 2.506   |
| Total |           | 1619627 | 100.000 |

**Entry 5**  
**t = 0 min**

Sample Name : t=0\_SOD\_657  
Sample ID :  
Data Filename : t=0\_SOD\_657.gcd  
Method Filename : Methode\_Achiral\_MUC\_Integration.gcm  
Batch Filename : batch.gcb  
Vial # : 14  
Injection Volume : 5 uL  
Date Acquired : 25.03.2019 19:43:02  
Date Processed : 25.03.2019 20:03:45

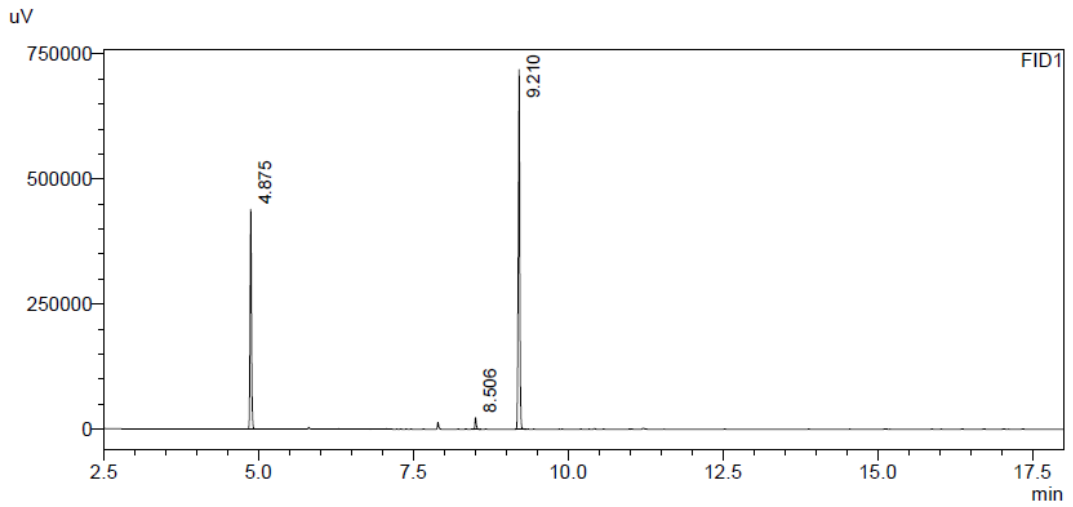

FID1

| Peak# | Ret. Time | Area    | Area%   |
|-------|-----------|---------|---------|
| 1     | 4.875     | 690217  | 36.081  |
| 2     | 8.506     | 33436   | 1.748   |
| 3     | 9.210     | 1189310 | 62.171  |
| Total |           | 1912964 | 100.000 |

Sample Name : t=0\_SOD\_676  
Sample ID :  
Data Filename : t=0\_SOD\_676.gcd  
Method Filename : Methode\_Achiral\_MUC\_Integration.gcm  
Batch Filename : batch.gcb  
Vial # : 42  
Injection Volume : 5 uL  
Date Acquired : 03.04.2019 04:38:17  
Date Processed : 03.04.2019 04:59:02

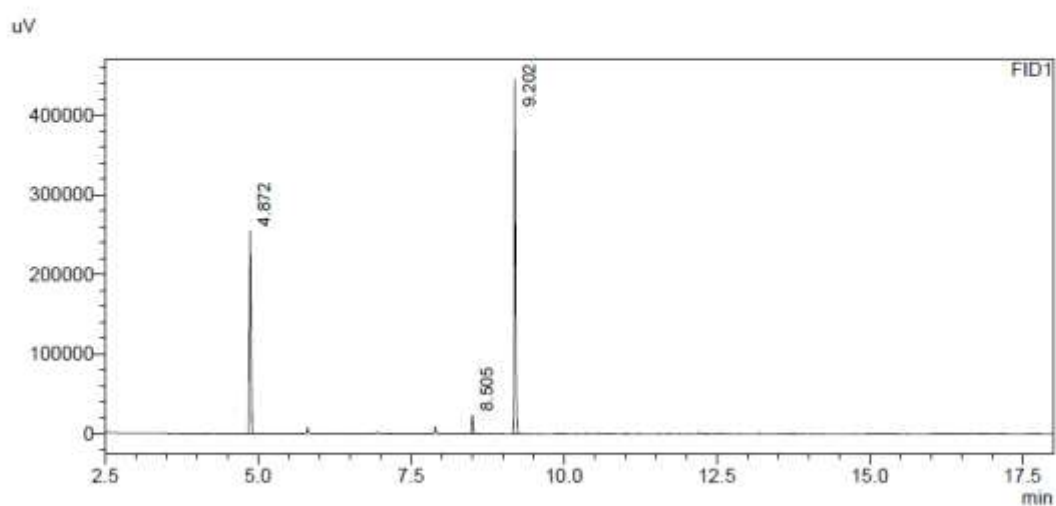

FID1

| Peak# | Ret. Time | Area    | Area%   |
|-------|-----------|---------|---------|
| 1     | 4.872     | 399250  | 36.286  |
| 2     | 8.505     | 32268   | 2.933   |
| 3     | 9.202     | 668778  | 60.782  |
| Total |           | 1100295 | 100.000 |

Sample Name : t=0\_SOD\_677  
Sample ID :  
Data Filename : t=0\_SOD\_677.gcd  
Method Filename : Methode\_Achiral\_MUC\_Integration.gcm  
Batch Filename : batch.gcb  
Vial # : 43  
Injection Volume : 5 uL  
Date Acquired : 03.04.2019 05:03:38  
Date Processed : 03.04.2019 05:24:21

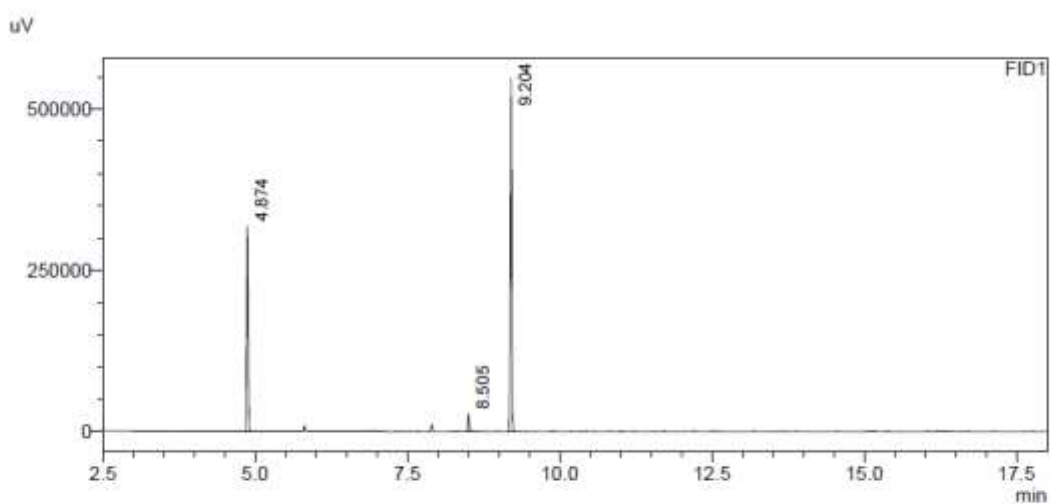

FID1

| Peak# | Ret. Time | Area    | Area%   |
|-------|-----------|---------|---------|
| 1     | 4.874     | 495973  | 35.667  |
| 2     | 8.505     | 39186   | 2.818   |
| 3     | 9.204     | 855418  | 61.515  |
| Total |           | 1390577 | 100.000 |

t = 24 h

Sample Name : t=24\_SOD\_657  
Sample ID :  
Data Filename : t=24\_SOD\_657.gcd  
Method Filename : Methode\_Achiral\_MUC\_Integration.gcm  
Batch Filename : batch.gcb  
Vial # : 4  
Injection Volume : 5 uL  
Date Acquired : 26.03.2019 19:36:34  
Date Processed : 26.03.2019 19:57:19

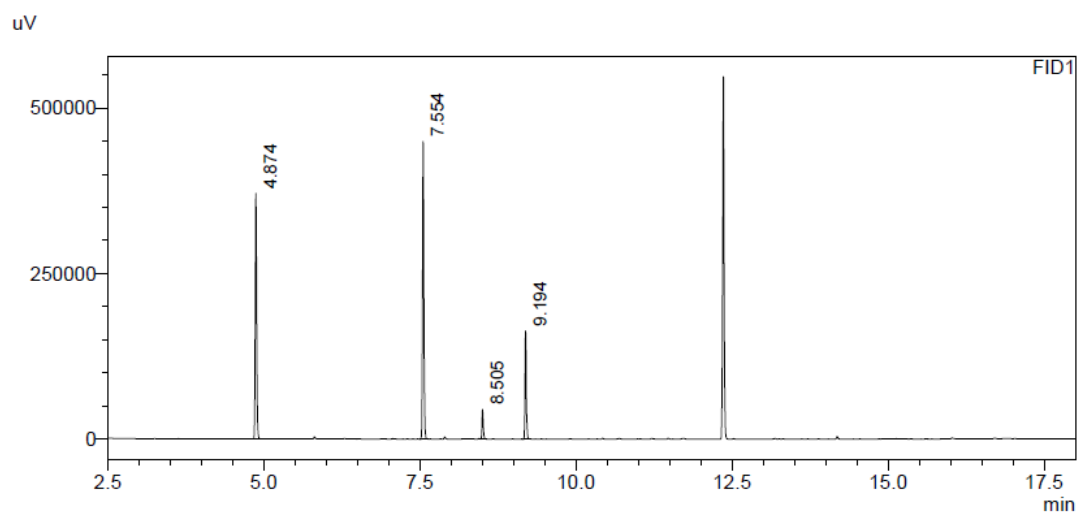

FID1

| Peak# | Ret. Time | Area    | Area%   |
|-------|-----------|---------|---------|
| 1     | 4.874     | 585414  | 37.862  |
| 2     | 7.554     | 665433  | 43.037  |
| 3     | 8.505     | 64485   | 4.171   |
| 4     | 9.194     | 230846  | 14.930  |
| Total |           | 1546178 | 100.000 |

Sample Name : t=24\_SOD\_676  
Sample ID :  
Data Filename : t=24\_SOD\_676.gcd  
Method Filename : Methode\_Achiral\_MUC\_Integration.gcm  
Batch Filename : batch.gcb  
Vial # : 92  
Injection Volume : 5 uL  
Date Acquired : 04.04.2019 14:02:42  
Date Processed : 04.04.2019 14:23:27

uV

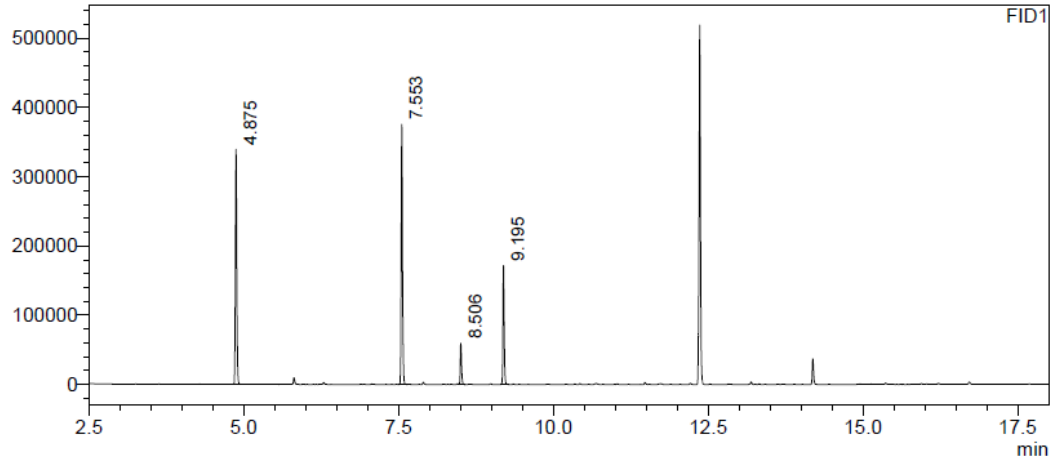

FID1

| Peak# | Ret. Time | Area    | Area%   |
|-------|-----------|---------|---------|
| 1     | 4.875     | 528321  | 37.327  |
| 2     | 7.553     | 557185  | 39.367  |
| 3     | 8.506     | 83417   | 5.894   |
| 4     | 9.195     | 246444  | 17.412  |
| Total |           | 1415368 | 100.000 |

Sample Name : t=24\_SOD\_677  
Sample ID :  
Data Filename : t=24\_SOD\_677.gcd  
Method Filename : Methode\_Achiral\_MUC\_Integration.gcm  
Batch Filename : batch.gcb  
Vial # : 93  
Injection Volume : 5 uL  
Date Acquired : 04.04.2019 14:28:08  
Date Processed : 04.04.2019 14:48:52

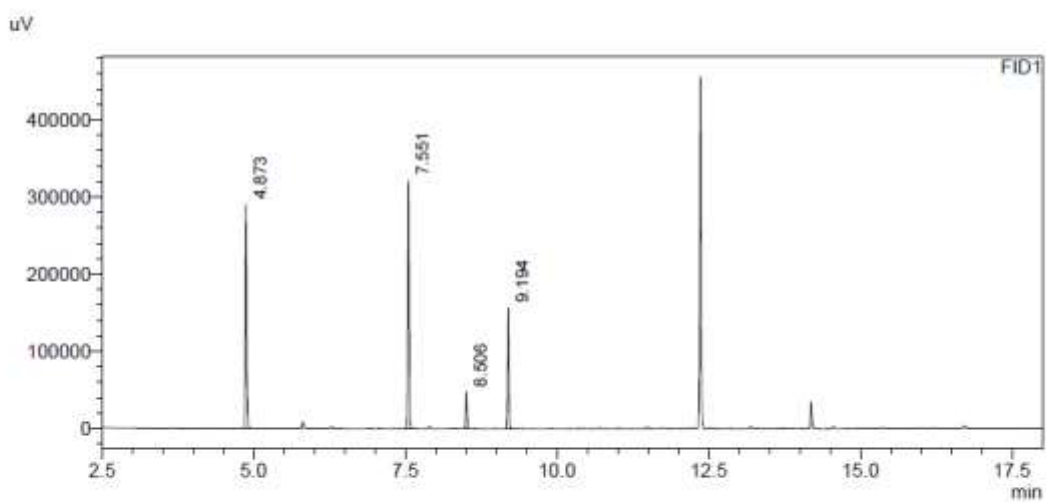

| Peak# | Ret. Time | Area    | Area%   |
|-------|-----------|---------|---------|
| 1     | 4.873     | 454008  | 37.202  |
| 2     | 7.551     | 475939  | 38.999  |
| 3     | 8.506     | 68526   | 5.615   |
| 4     | 9.194     | 221901  | 18.183  |
| Total |           | 1220375 | 100.000 |



t = 48 h

Sample Name : t=48\_SOD\_657  
Sample ID :  
Data Filename : t=48\_SOD\_657.gcd  
Method Filename : Methode\_Achiral\_MUC\_Integration.gcm  
Batch Filename : batch.gcb  
Vial # : 4  
Injection Volume : 5 uL  
Date Acquired : 27.03.2019 20:43:01  
Date Processed : 27.03.2019 21:03:45

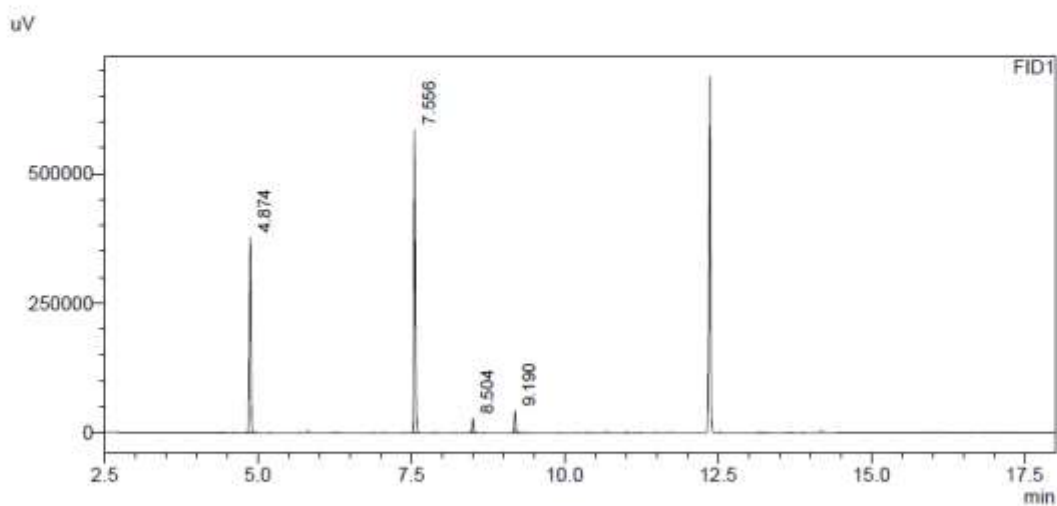

FID1

| Peak# | Ret. Time | Area    | Area%   |
|-------|-----------|---------|---------|
| 1     | 4.874     | 595167  | 37.498  |
| 2     | 7.556     | 893719  | 56.308  |
| 3     | 8.504     | 39143   | 2.466   |
| 4     | 9.190     | 59170   | 3.728   |
| Total |           | 1587200 | 100.000 |

Sample Name : t=48\_SOD\_676  
Sample ID :  
Data Filename : t=48\_SOD\_676.gcd  
Method Filename : Methode\_Achiral\_MUC\_Integration.gcm  
Batch Filename : batch.gcb  
Vial # : 122  
Injection Volume : 5 uL  
Date Acquired : 05.04.2019 02:45:56  
Date Processed : 05.04.2019 03:06:39

uV

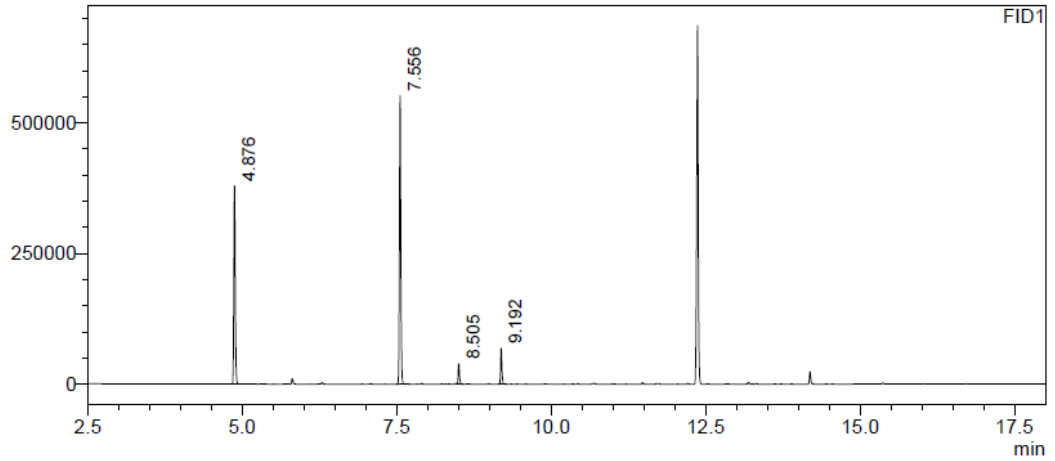

FID1

| Peak# | Ret. Time | Area    | Area%   |
|-------|-----------|---------|---------|
| 1     | 4.876     | 605400  | 37.760  |
| 2     | 7.556     | 843421  | 52.605  |
| 3     | 8.505     | 55414   | 3.456   |
| 4     | 9.192     | 99066   | 6.179   |
| Total |           | 1603301 | 100.000 |

Sample Name : t=48\_SOD\_677  
Sample ID :  
Data Filename : t=48\_SOD\_677.gcd  
Method Filename : Methode\_Achiral\_MUC\_Integration.gcm  
Batch Filename : batch.gcd  
Vial # : 123  
Injection Volume : 5 uL  
Date Acquired : 05.04.2019 03:11:18  
Date Processed : 05.04.2019 03:32:01

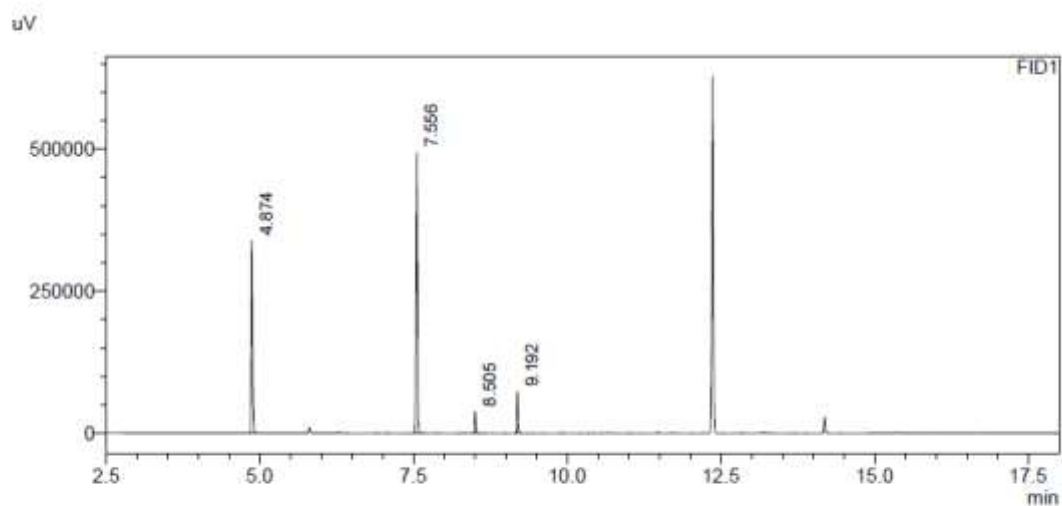

FID1

| Peak# | Ret. Time | Area    | Area%   |
|-------|-----------|---------|---------|
| 1     | 4.874     | 519567  | 36.261  |
| 2     | 7.556     | 755540  | 52.729  |
| 3     | 8.505     | 54924   | 3.833   |
| 4     | 9.192     | 102829  | 7.176   |
| Total |           | 1432860 | 100.000 |

t = 72 h

Sample Name : t=72\_SOD\_657  
Sample ID :  
Data Filename : t=72\_SOD\_657.gcd  
Method Filename : Methode\_Achiral\_MUC\_Integration.gcm  
Batch Filename : batch.gcb  
Vial # : 4  
Injection Volume : 5 uL  
Date Acquired : 28.03.2019 18:55:44  
Date Processed : 28.03.2019 19:16:27

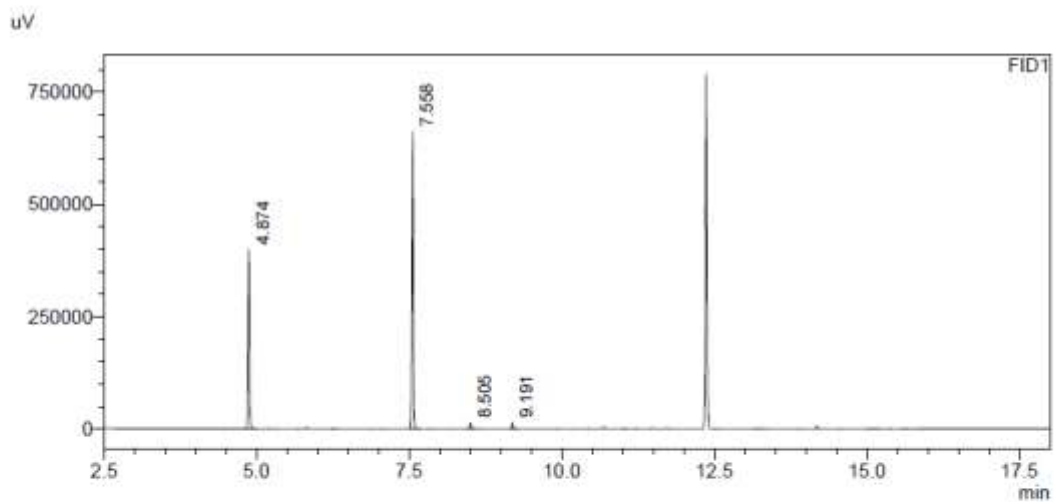

FID1

| Peak# | Ret. Time | Area    | Area%   |
|-------|-----------|---------|---------|
| 1     | 4.874     | 632310  | 37.138  |
| 2     | 7.558     | 1031893 | 60.607  |
| 3     | 8.505     | 19472   | 1.144   |
| 4     | 9.191     | 18912   | 1.111   |
| Total |           | 1702587 | 100.000 |

Sample Name : t=72\_SOD\_676  
Sample ID :  
Data Filename : t=72\_SOD\_676.gcd  
Method Filename : Methode\_Achiral\_MUC\_Integration.gcm  
Batch Filename : batch.gcb  
Vial # : 9  
Injection Volume : 5 uL  
Date Acquired : 06.04.2019 15:43:40  
Date Processed : 06.04.2019 16:04:24

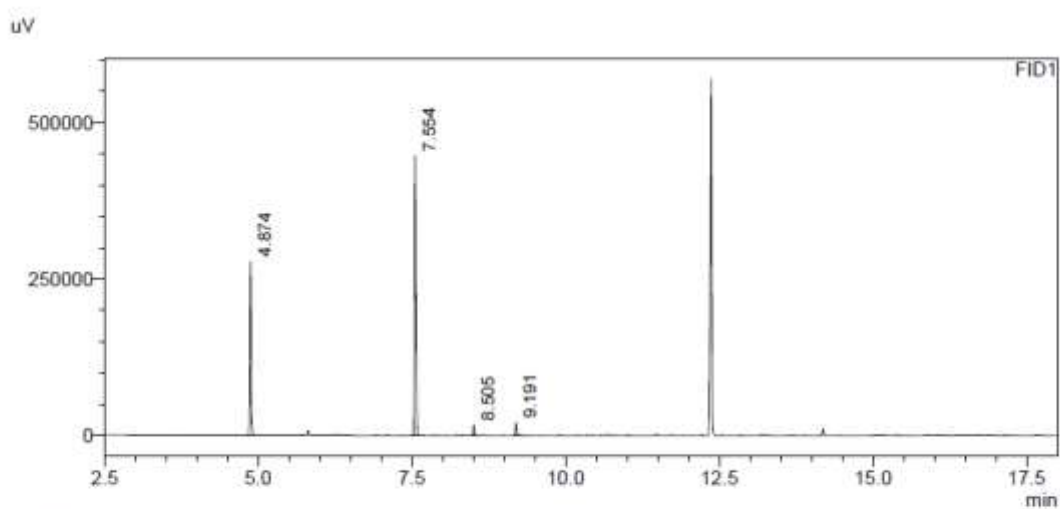

FID1

| Peak# | Ret. Time | Area    | Area%   |
|-------|-----------|---------|---------|
| 1     | 4.874     | 428269  | 37.313  |
| 2     | 7.554     | 667027  | 58.115  |
| 3     | 8.505     | 22746   | 1.982   |
| 4     | 9.191     | 29722   | 2.590   |
| Total |           | 1147764 | 100.000 |

Sample Name : t=72\_SOD\_677  
 Sample ID :  
 Data Filename : t=72\_SOD\_677.gcd  
 Method Filename : Methode\_Achiral\_MUC\_Integration.gcm  
 Batch Filename : batch.gcb  
 Vial # : 10  
 Injection Volume : 5 uL  
 Date Acquired : 06.04.2019 16:09:04  
 Date Processed : 06.04.2019 16:29:47

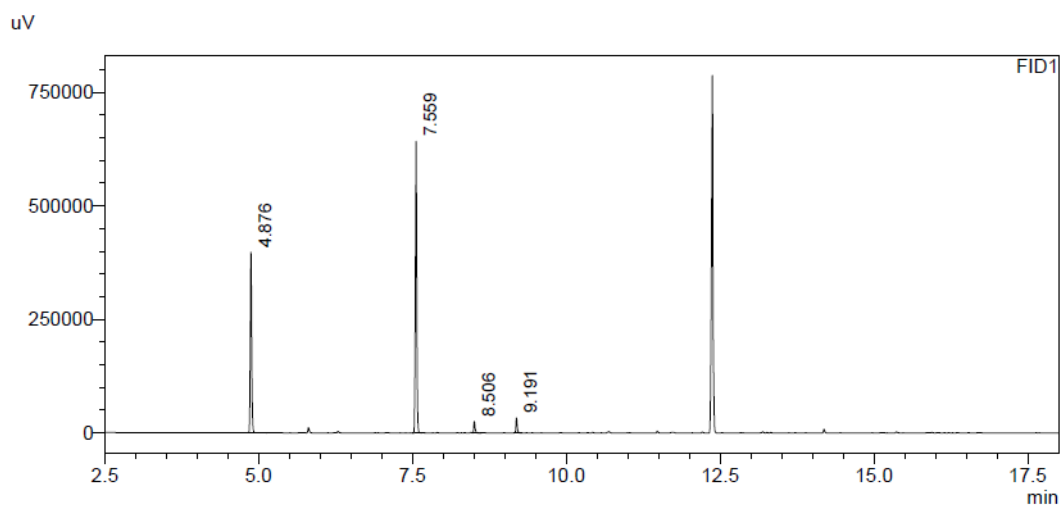

FID1

| Peak# | Ret. Time | Area    | Area%   |
|-------|-----------|---------|---------|
| 1     | 4.876     | 623508  | 36.427  |
| 2     | 7.559     | 1005228 | 58.729  |
| 3     | 8.506     | 34960   | 2.042   |
| 4     | 9.191     | 47948   | 2.801   |
| Total |           | 1711644 | 100.000 |

Entry 6  
t = 0 min

Sample Name : t=0\_SOD\_658  
Sample ID :  
Data Filename : t=0\_SOD\_658.gcd  
Method Filename : Methode\_Achiral\_MUC\_Integration.gcm  
Batch Filename : batch.gcb  
Vial # : 15  
Injection Volume : 5 uL  
Date Acquired : 25.03.2019 20:08:23  
Date Processed : 25.03.2019 20:29:07

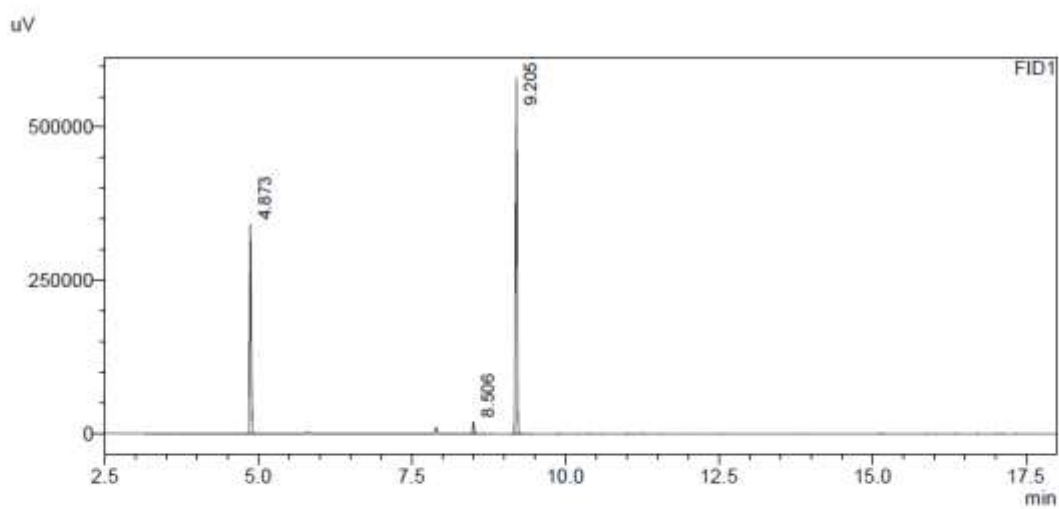

| Peak# | Ret. Time | Area    | Area%   |
|-------|-----------|---------|---------|
| 1     | 4.873     | 528926  | 35.948  |
| 2     | 8.506     | 27847   | 1.893   |
| 3     | 9.205     | 914601  | 62.160  |
| Total |           | 1471373 | 100.000 |

Sample Name : t=0\_SOD\_678  
Sample ID :  
Data Filename : t=0\_SOD\_678.gcd  
Method Filename : Methode\_Achiral\_MUC\_Integration.gcm  
Batch Filename : batch.gcb  
Vial # : 44  
Injection Volume : 5 uL  
Date Acquired : 03.04.2019 05:29:00  
Date Processed : 03.04.2019 05:49:45

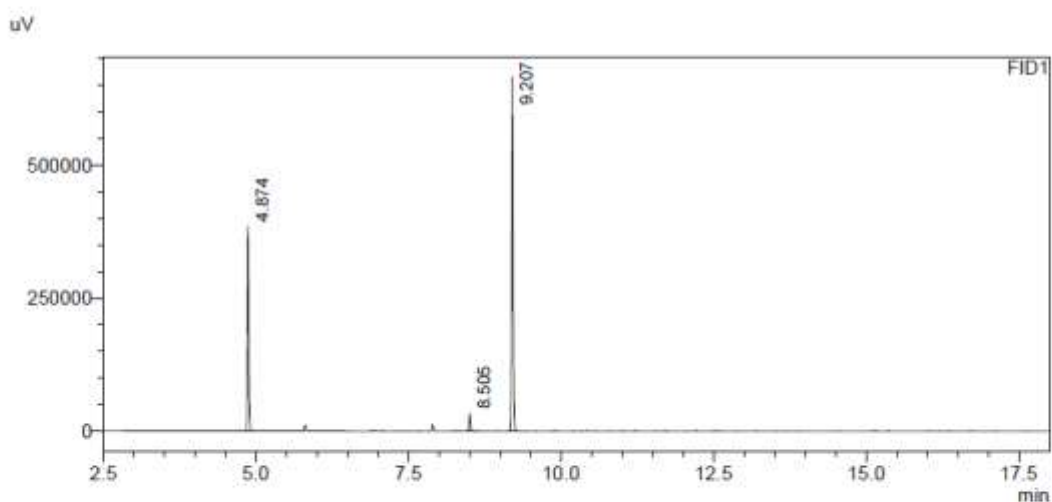

FID1

| Peak# | Ret. Time | Area    | Area%   |
|-------|-----------|---------|---------|
| 1     | 4.874     | 606092  | 35.382  |
| 2     | 8.505     | 45684   | 2.667   |
| 3     | 9.207     | 1061204 | 61.951  |
| Total |           | 1712980 | 100.000 |



Sample Name : t=0\_SOD\_679  
 Sample ID :  
 Data Filename : t=0\_SOD\_679.gcd  
 Method Filename : Methode\_Achiral\_MUC\_Integration.gcm  
 Batch Filename : batch.gcb  
 Vial # : 45  
 Injection Volume : 5 uL  
 Date Acquired : 03.04.2019 05:54:24  
 Date Processed : 03.04.2019 06:15:07

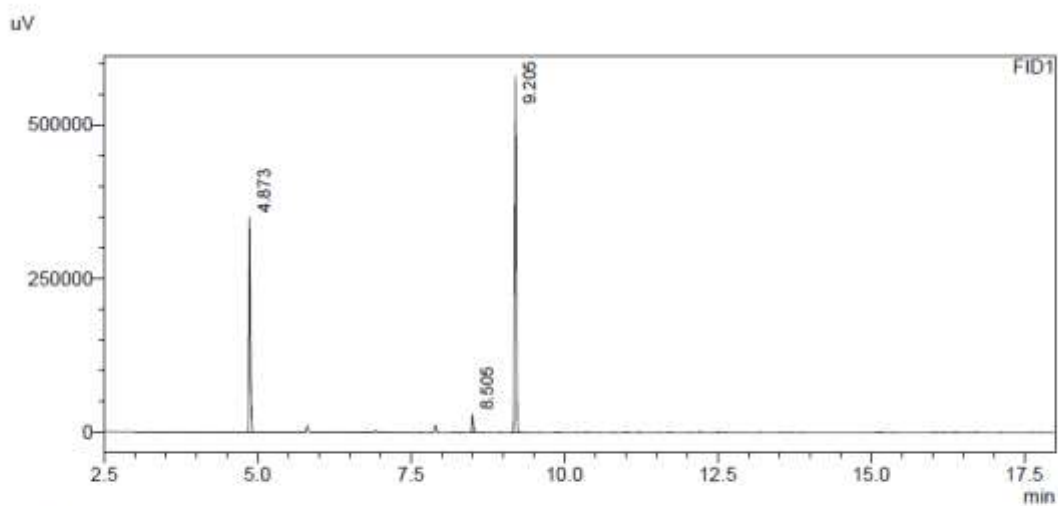

FID1

| Peak# | Ret. Time | Area    | Area%   |
|-------|-----------|---------|---------|
| 1     | 4.873     | 545695  | 36.250  |
| 2     | 8.505     | 40319   | 2.678   |
| 3     | 9.205     | 919368  | 61.072  |
| Total |           | 1505382 | 100.000 |

t = 24 h

Sample Name : t=24\_SOD\_658  
Sample ID :  
Data Filename : t=24\_SOD\_658.gcd  
Method Filename : Methode\_Achiral\_MUC\_Integration.gcm  
Batch Filename : batch.gcb  
Vial # : 5  
Injection Volume : 5 uL  
Date Acquired : 26.03.2019 20:01:54  
Date Processed : 26.03.2019 20:22:38

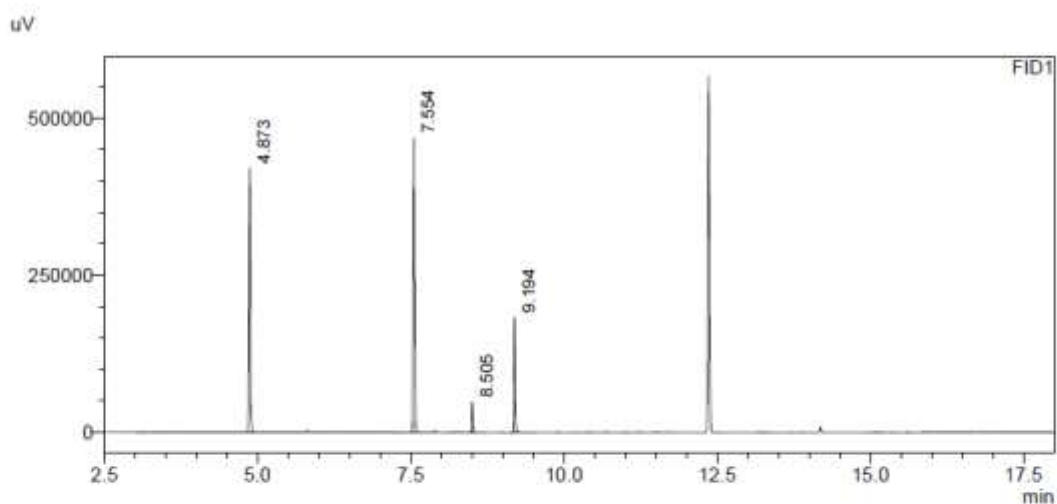

FID1

| Peak# | Ret. Time | Area    | Area%   |
|-------|-----------|---------|---------|
| 1     | 4.873     | 652051  | 38.445  |
| 2     | 7.554     | 713751  | 42.083  |
| 3     | 8.505     | 68586   | 4.044   |
| 4     | 9.194     | 261669  | 15.428  |
| Total |           | 1696057 | 100.000 |

Sample Name : t=24\_SOD\_678  
Sample ID :  
Data Filename : t=24\_SOD\_678.gcd  
Method Filename : Methode\_Achiral\_MUC\_Integration.gcm  
Batch Filename : batch.gcb  
Vial # : 94  
Injection Volume : 5 uL  
Date Acquired : 04.04.2019 14:53:33  
Date Processed : 04.04.2019 15:14:19

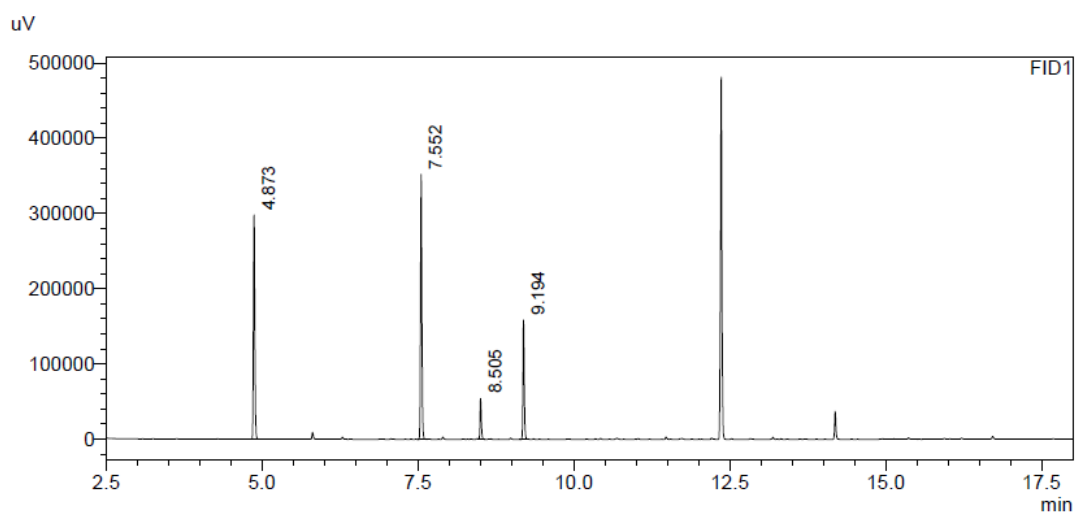

FID1

| Peak# | Ret. Time | Area    | Area%   |
|-------|-----------|---------|---------|
| 1     | 4.873     | 469420  | 36.230  |
| 2     | 7.552     | 522044  | 40.291  |
| 3     | 8.505     | 76829   | 5.930   |
| 4     | 9.194     | 227391  | 17.550  |
| Total |           | 1295685 | 100.000 |

Sample Name : t=24\_SOD\_679  
 Sample ID :  
 Data Filename : t=24\_SOD\_679.gcd  
 Method Filename : Methode\_Achiral\_MUC\_Integration.gcm  
 Batch Filename : batch.gcb  
 Vial # : 95  
 Injection Volume : 5 uL  
 Date Acquired : 04.04.2019 15:19:03  
 Date Processed : 04.04.2019 15:39:47

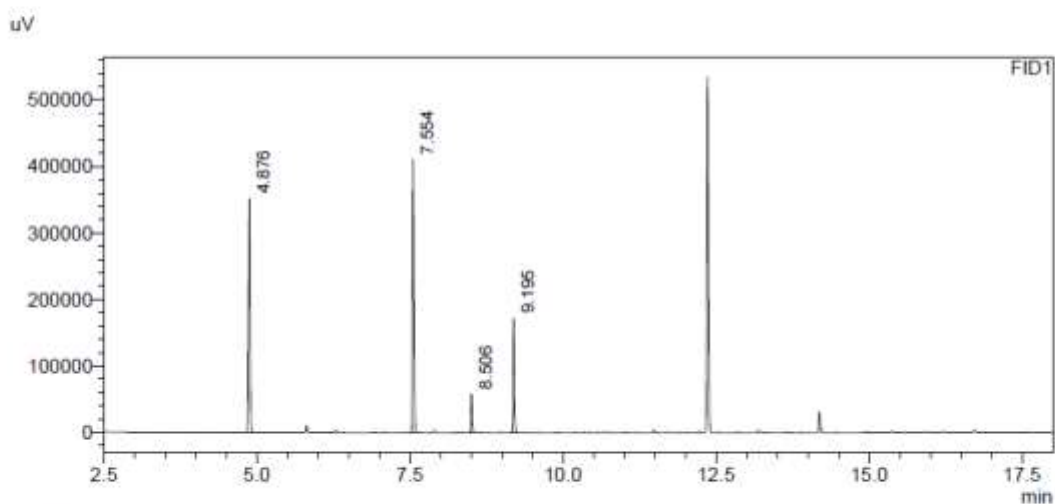

FID1

| Peak# | Ret. Time | Area    | Area%   |
|-------|-----------|---------|---------|
| 1     | 4.876     | 558714  | 37.556  |
| 2     | 7.554     | 599903  | 40.325  |
| 3     | 8.506     | 82958   | 5.576   |
| 4     | 9.195     | 246098  | 16.542  |
| Total |           | 1487672 | 100.000 |

t = 48 h

Sample Name : t=48\_SOD\_658  
Sample ID :  
Data Filename : t=48\_SOD\_658.gcd  
Method Filename : Methode\_Achiral\_MUC\_Integration.gcm  
Batch Filename : batch.gcb  
Vial # : 5  
Injection Volume : 5 uL  
Date Acquired : 27.03.2019 21:08:21  
Date Processed : 27.03.2019 21:29:05

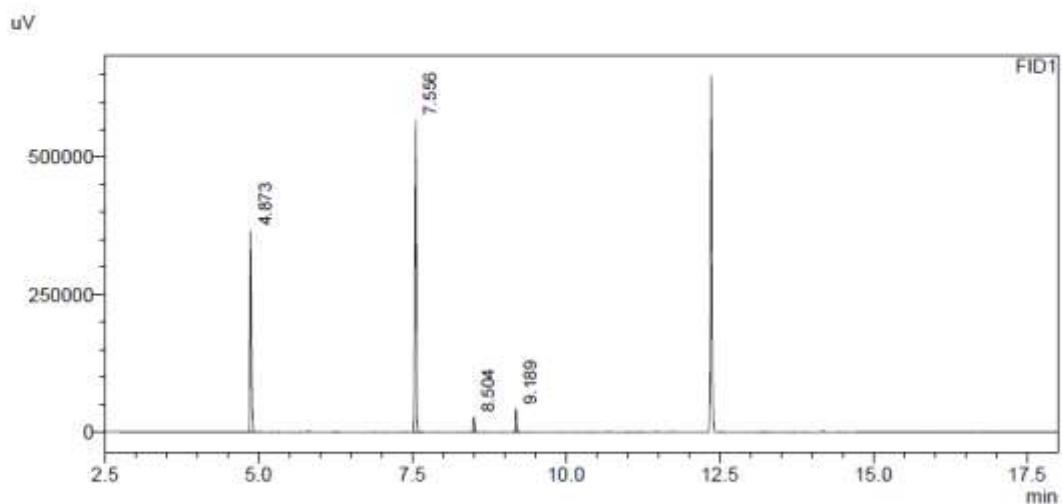

| Peak# | Ret. Time | Area    | Area%   |
|-------|-----------|---------|---------|
| 1     | 4.873     | 573538  | 37.138  |
| 2     | 7.556     | 869609  | 56.309  |
| 3     | 8.504     | 39348   | 2.548   |
| 4     | 9.189     | 61846   | 4.005   |
| Total |           | 1544341 | 100.000 |

Sample Name : t=48\_SOD\_678  
 Sample ID :  
 Data Filename : t=48\_SOD\_678.gcd  
 Method Filename : Methode\_Achiral\_MUC\_Integration.gcm  
 Batch Filename : batch.gcb  
 Vial # : 124  
 Injection Volume : 5 uL  
 Date Acquired : 05.04.2019 03:36:43  
 Date Processed : 05.04.2019 03:57:27

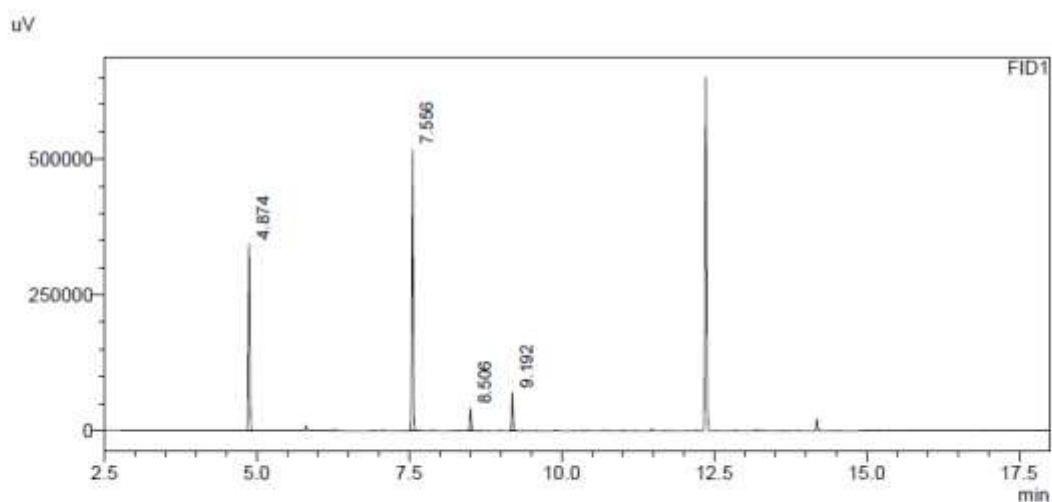

FID1

| Peak# | Ret. Time | Area    | Area%   |
|-------|-----------|---------|---------|
| 1     | 4.874     | 538626  | 36.398  |
| 2     | 7.556     | 782947  | 52.908  |
| 3     | 8.506     | 58708   | 3.967   |
| 4     | 9.192     | 99545   | 6.727   |
| Total |           | 1479826 | 100.000 |

Sample Name : t=48\_SOD\_679  
Sample ID :  
Data Filename : t=48\_SOD\_679.gcd  
Method Filename : Methode\_Achiral\_MUC\_Integration.gcm  
Batch Filename : batch.gcb  
Vial # : 125  
Injection Volume : 5 uL  
Date Acquired : 05.04.2019 04:02:10  
Date Processed : 05.04.2019 04:22:53

uV

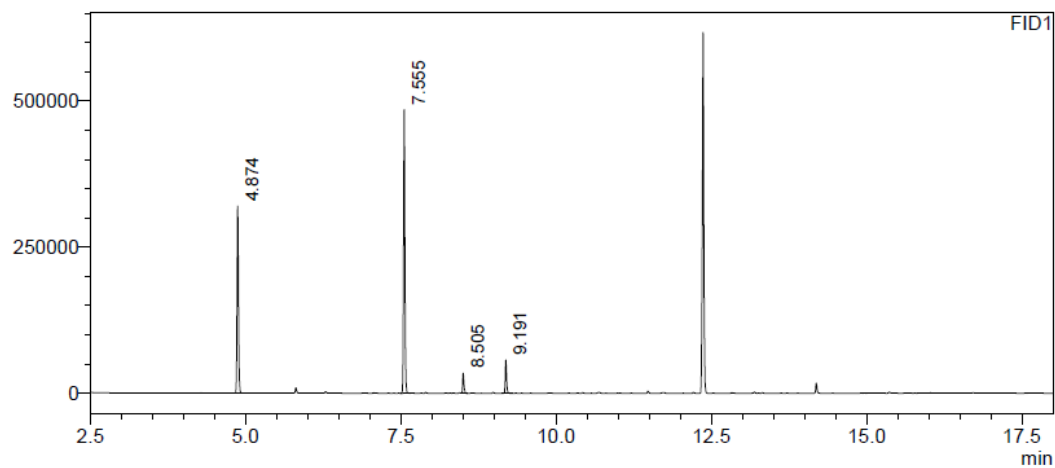

FID1

| Peak# | Ret. Time | Area    | Area%   |
|-------|-----------|---------|---------|
| 1     | 4.874     | 505187  | 37.103  |
| 2     | 7.555     | 726466  | 53.354  |
| 3     | 8.505     | 48185   | 3.539   |
| 4     | 9.191     | 81757   | 6.004   |
| Total |           | 1361595 | 100.000 |

t = 72 h

Sample Name : t=72\_SOD\_658  
Sample ID :  
Data Filename : t=72\_SOD\_658.gcd  
Method Filename : Methode\_Achiral\_MUC\_Integration.gcm  
Batch Filename : batch.gcb  
Vial # : 5  
Injection Volume : 5 uL  
Date Acquired : 28.03.2019 19:21:00  
Date Processed : 28.03.2019 19:41:44

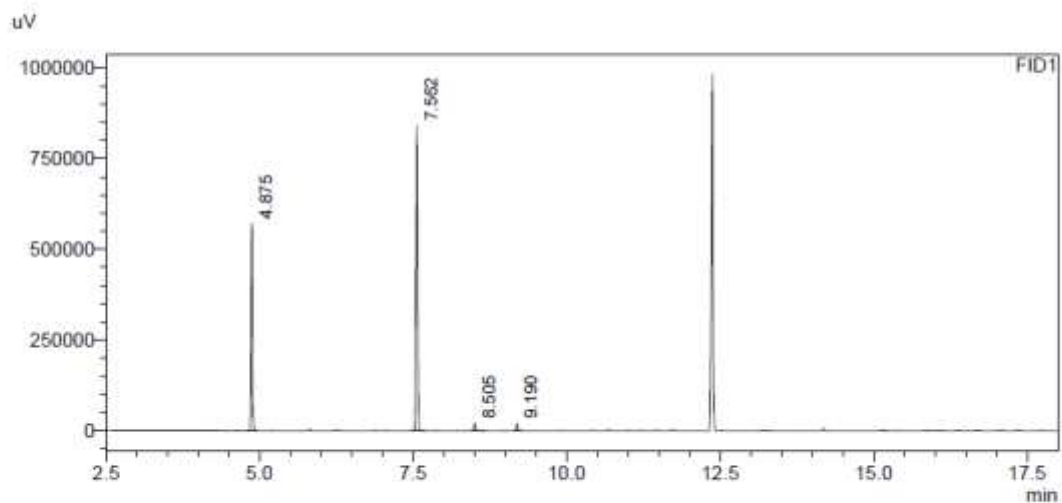

FID1

| Peak# | Ret. Time | Area    | Area%   |
|-------|-----------|---------|---------|
| 1     | 4.875     | 883855  | 37.765  |
| 2     | 7.562     | 1400284 | 59.831  |
| 3     | 8.505     | 28320   | 1.210   |
| 4     | 9.190     | 27924   | 1.193   |
| Total |           | 2340384 | 100.000 |



Sample Name : t=72\_SOD\_678  
Sample ID :  
Data Filename : t=72\_SOD\_678.gcd  
Method Filename : Methode\_Achiral\_MUC\_Integration.gcm  
Batch Filename : batch.gcb  
Vial # : 11  
Injection Volume : 5 uL  
Date Acquired : 06.04.2019 16:34:28  
Date Processed : 06.04.2019 16:55:11

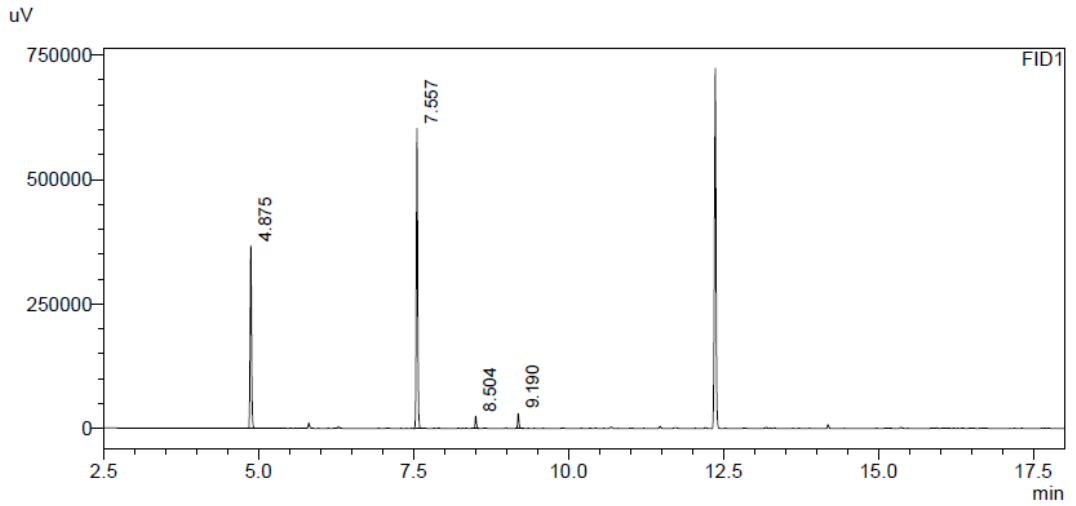

FID1

| Peak# | Ret. Time | Area    | Area%   |
|-------|-----------|---------|---------|
| 1     | 4.875     | 577412  | 36.448  |
| 2     | 7.557     | 929041  | 58.644  |
| 3     | 8.504     | 34538   | 2.180   |
| 4     | 9.190     | 43220   | 2.728   |
| Total |           | 1584210 | 100.000 |

Sample Name : t=72\_SOD\_679  
Sample ID :  
Data Filename : t=72\_SOD\_679.gcd  
Method Filename : Methode\_Achiral\_MUC\_Integration.gcm  
Batch Filename : batch.gcb  
Vial # : 12  
Injection Volume : 5 uL  
Date Acquired : 06.04.2019 16:59:51  
Date Processed : 06.04.2019 17:20:34

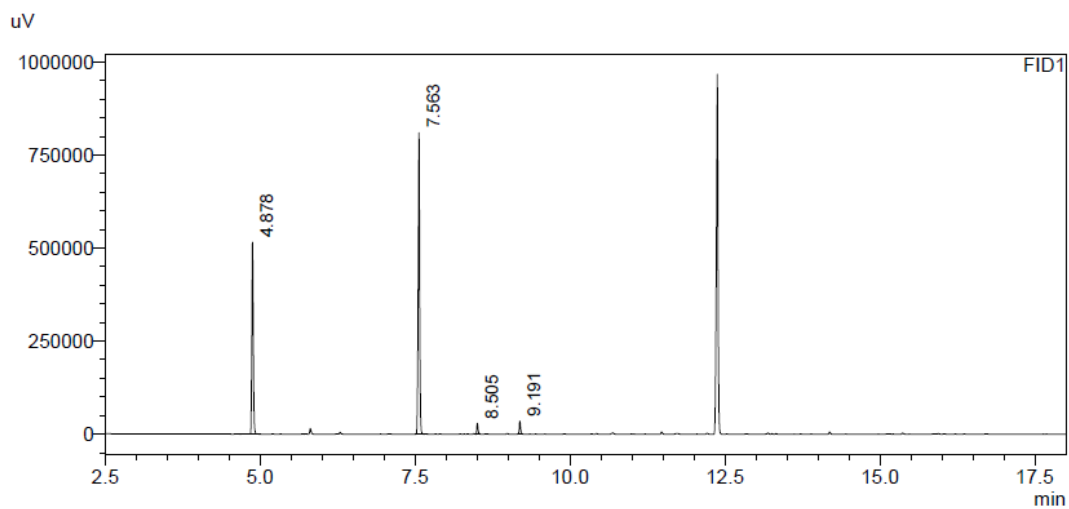

FID1

| Peak# | Ret. Time | Area    | Area%   |
|-------|-----------|---------|---------|
| 1     | 4.878     | 830657  | 37.152  |
| 2     | 7.563     | 1316530 | 58.883  |
| 3     | 8.505     | 40545   | 1.813   |
| 4     | 9.191     | 48116   | 2.152   |
| Total |           | 2235848 | 100.000 |

## 1.2 Achiral GC spectra for Fig. 4 of the Manuscript (initial conversions/ees)

I, *i*PrOH

t = 0 min

Sample Name : t=0\_SOD\_785  
Sample ID :  
Data Filename : t=0\_SOD\_785.gcd  
Method Filename : Methode\_Achiral\_MUC\_Integration.gcm  
Batch Filename : batch.gcb  
Vial # : 4  
Injection Volume : 5 uL  
Date Acquired : 02.07.2019 16:31:51  
Date Processed : 02.07.2019 16:52:34

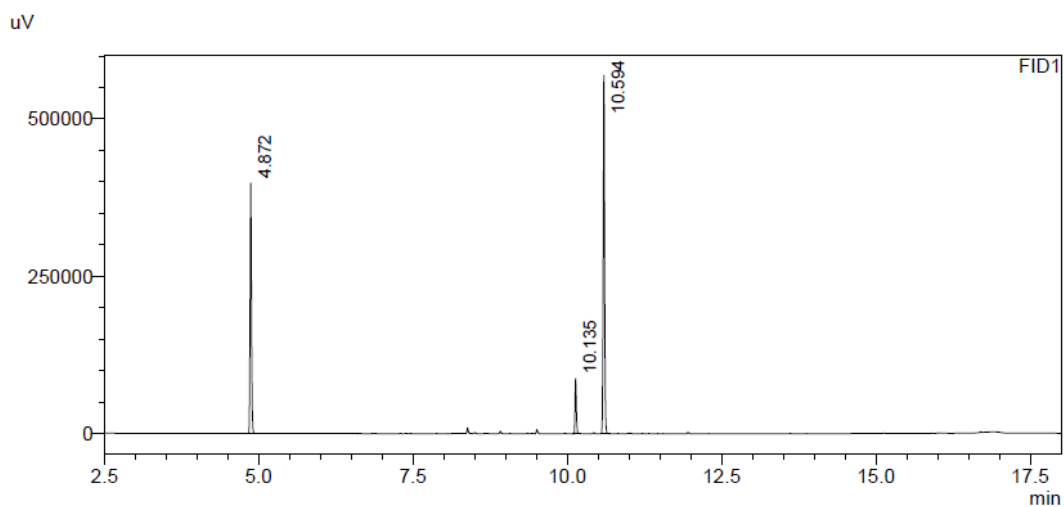

| Peak# | Ret. Time | Area    | Area%   |
|-------|-----------|---------|---------|
| 1     | 4.872     | 625469  | 38.097  |
| 2     | 10.135    | 128293  | 7.814   |
| 3     | 10.594    | 888004  | 54.088  |
| Total |           | 1641766 | 100.000 |

t = 15 min

Sample Name : t=0.25\_SOD\_785  
Sample ID :  
Data Filename : t=0.25\_SOD\_785.gcd  
Method Filename : Methode\_Achiral\_MUC\_Integration.gcm  
Batch Filename : batch.gcb  
Vial # : 8  
Injection Volume : 5 uL  
Date Acquired : 02.07.2019 22:47:01  
Date Processed : 08.08.2019 17:02:50

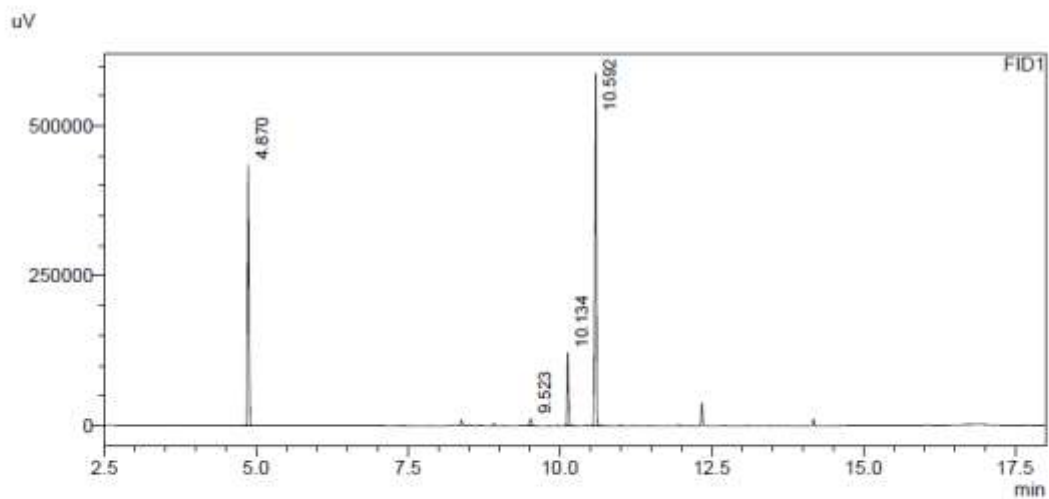

| Peak# | Ret. Time | Area    | Area%   |
|-------|-----------|---------|---------|
| 1     | 4.870     | 680435  | 37.321  |
| 2     | 9.523     | 24806   | 1.361   |
| 3     | 10.134    | 175968  | 9.652   |
| 4     | 10.592    | 941978  | 51.667  |
| Total |           | 1823187 | 100.000 |

t = 30 min

Sample Name : t=0.5\_SOD\_785  
Sample ID :  
Data Filename : t=0.5\_SOD\_785.gcd  
Method Filename : Methode\_Achiral\_MUC\_Integration.gcm  
Batch Filename : batch.gcb  
Vial # : 12  
Injection Volume : 5 uL  
Date Acquired : 03.07.2019 00:28:36  
Date Processed : 03.07.2019 16:49:25

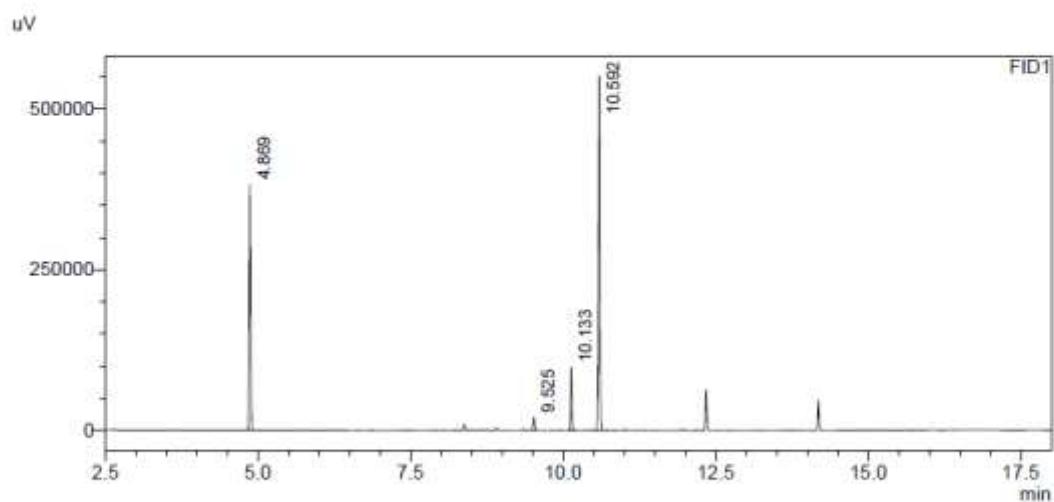

FID1

| Peak# | Ret. Time | Area    | Area%   |
|-------|-----------|---------|---------|
| 1     | 4.869     | 598753  | 36.580  |
| 2     | 9.525     | 35621   | 2.176   |
| 3     | 10.133    | 140425  | 8.579   |
| 4     | 10.592    | 862040  | 52.665  |
| Total |           | 1636839 | 100.000 |

t = 45 min

Sample Name : t=0.75\_SOD\_785  
Sample ID :  
Data Filename : t=0.75\_SOD\_785.gcd  
Method Filename : Methode\_Achiral\_MUC\_Integration.gcm  
Batch Filename : batch.gcb  
Vial # : 16  
Injection Volume : 5 uL  
Date Acquired : 03.07.2019 02:10:11  
Date Processed : 03.07.2019 16:52:23

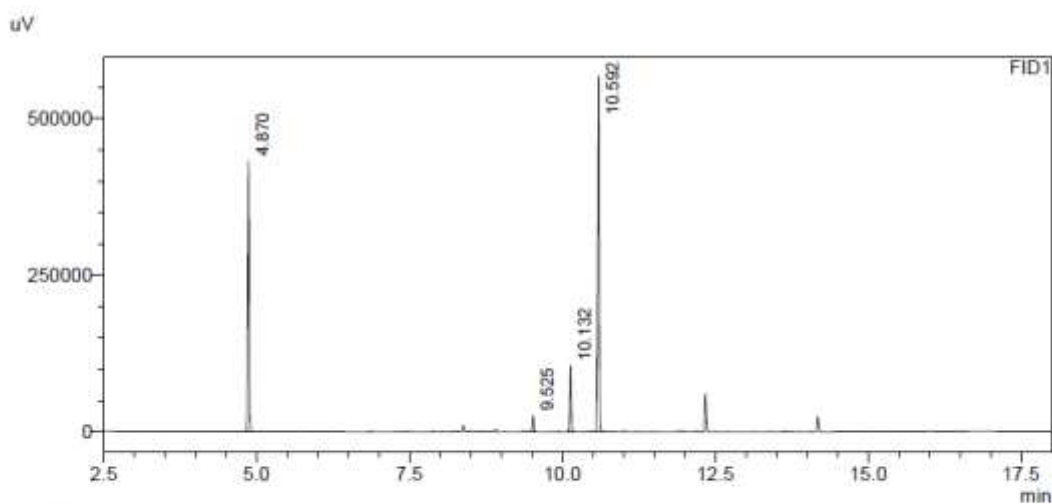

FID1

| Peak# | Ret. Time | Area    | Area%   |
|-------|-----------|---------|---------|
| 1     | 4.870     | 676157  | 37.805  |
| 2     | 9.525     | 43877   | 2.453   |
| 3     | 10.132    | 152672  | 8.536   |
| 4     | 10.592    | 915850  | 51.206  |
| Total |           | 1788556 | 100.000 |

t = 1 h

Sample Name : t=1\_SOD\_785  
Sample ID :  
Data Filename : t=1\_SOD\_785.gcd  
Method Filename : Methode\_Achiral\_MUC\_Integration.gcm  
Batch Filename : batch.gcb  
Vial # : 20  
Injection Volume : 5 uL  
Date Acquired : 03.07.2019 03:51:47  
Date Processed : 03.07.2019 16:55:44

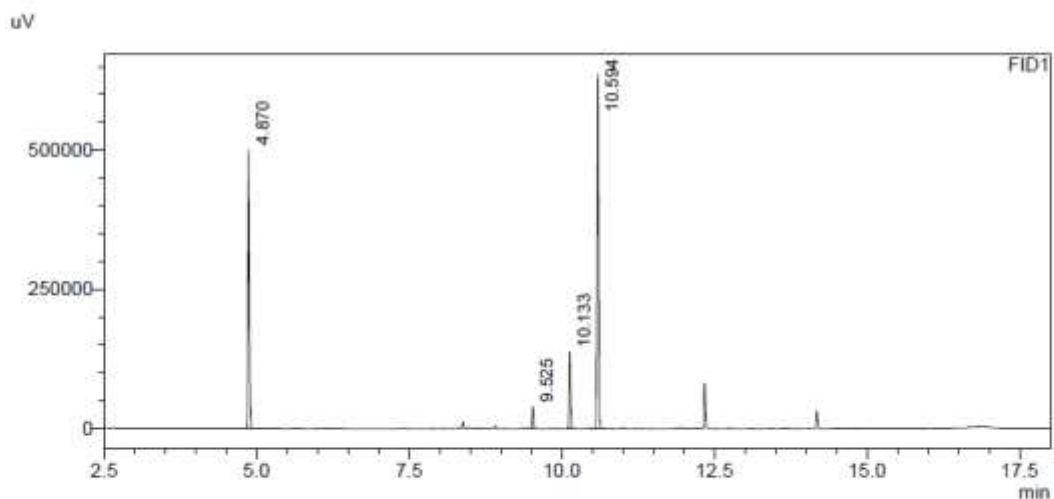

FID1

| Peak# | Ret. Time | Area    | Area%   |
|-------|-----------|---------|---------|
| 1     | 4.870     | 790210  | 37.706  |
| 2     | 9.525     | 64142   | 3.061   |
| 3     | 10.133    | 195325  | 9.320   |
| 4     | 10.594    | 1046036 | 49.913  |
| Total |           | 2095713 | 100.000 |

t = 1.5 h

Sample Name : t=1.5\_SOD\_785  
Sample ID :  
Data Filename : t=1.5\_SOD\_785.gcd  
Method Filename : Methode\_Achiral\_MUC\_Integration.gcm  
Batch Filename : batch.gcb  
Vial # : 24  
Injection Volume : 5 uL  
Date Acquired : 03.07.2019 05:33:30  
Date Processed : 03.07.2019 16:57:29

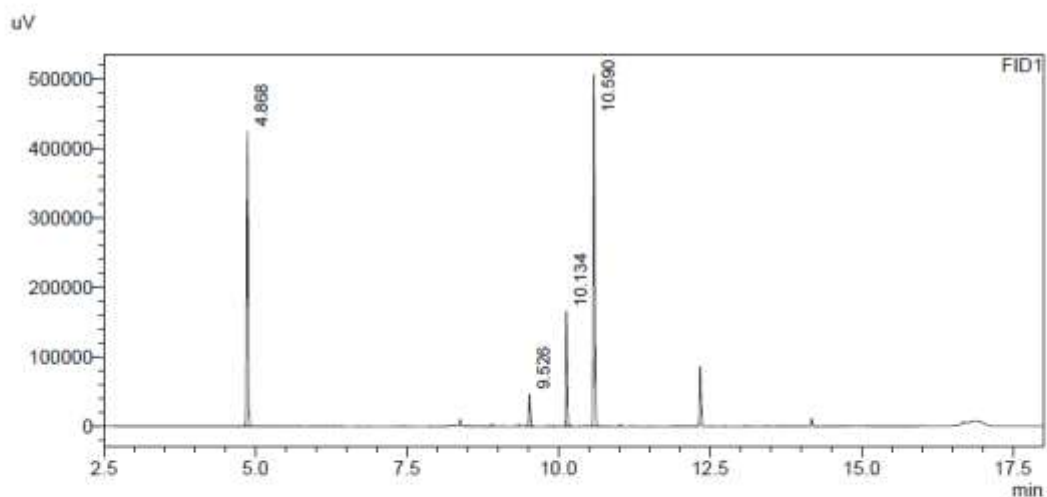

FID1

| Peak# | Ret. Time | Area    | Area%   |
|-------|-----------|---------|---------|
| 1     | 4.868     | 661043  | 37.952  |
| 2     | 9.526     | 73497   | 4.220   |
| 3     | 10.134    | 241713  | 13.877  |
| 4     | 10.590    | 765521  | 43.951  |
| Total |           | 1741774 | 100.000 |



t = 2 h

Sample Name : t=2\_SOD\_785  
Sample ID :  
Data Filename : t=2\_SOD\_785.gcd  
Method Filename : Methode\_Achiral\_MUC\_Integration.gcm  
Batch Filename : batch.gcb  
Vial # : 28  
Injection Volume : 5 uL  
Date Acquired : 03.07.2019 07:15:11  
Date Processed : 03.07.2019 07:35:56

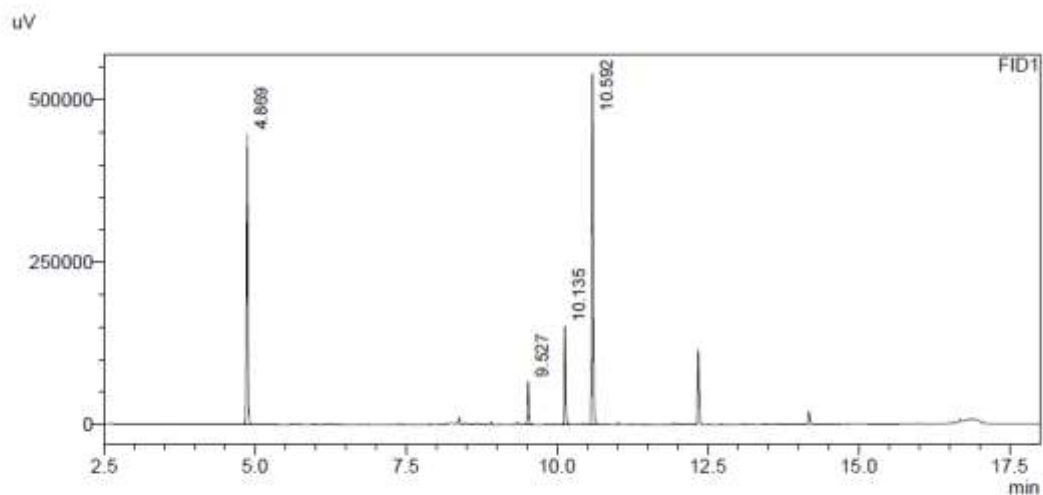

FID1

| Peak# | Ret. Time | Area    | Area%   |
|-------|-----------|---------|---------|
| 1     | 4.869     | 700742  | 37.366  |
| 2     | 9.527     | 101163  | 5.394   |
| 3     | 10.135    | 217759  | 11.612  |
| 4     | 10.592    | 855674  | 45.628  |
| Total |           | 1875338 | 100.000 |

t = 2.5 h

Sample Name : t=2.5\_SOD\_785  
Sample ID :  
Data Filename : t=2.5\_SOD\_785.gcd  
Method Filename : Methode\_Achiral\_MUC\_Integration.gcm  
Batch Filename : batch.gcb  
Vial # : 32  
Injection Volume : 5 uL  
Date Acquired : 03.07.2019 08:56:50  
Date Processed : 03.07.2019 09:17:34

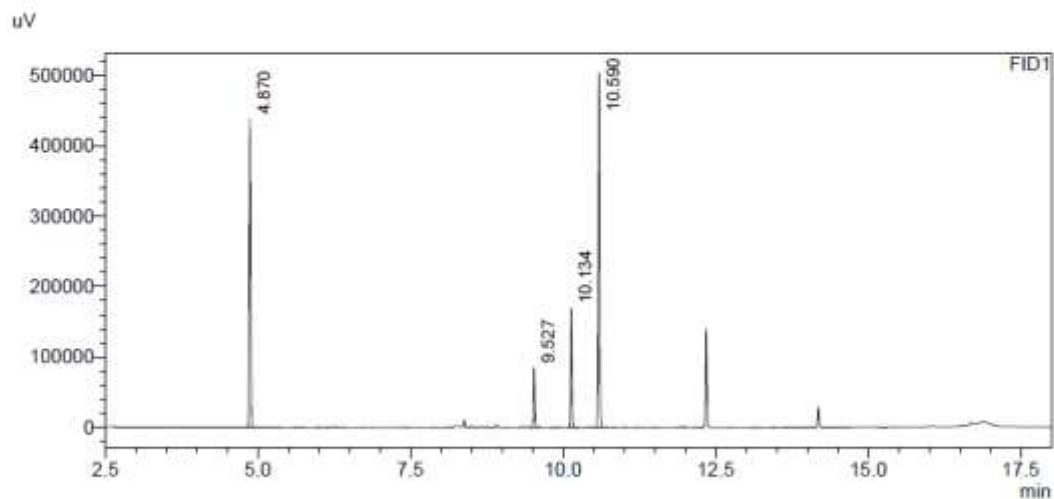

FID1

| Peak# | Ret. Time | Area    | Area%   |
|-------|-----------|---------|---------|
| 1     | 4.870     | 689628  | 37.338  |
| 2     | 9.527     | 128086  | 6.935   |
| 3     | 10.134    | 243104  | 13.162  |
| 4     | 10.590    | 786145  | 42.564  |
| Total |           | 1846963 | 100.000 |

t = 3 h

Sample Name : t=3\_SOD\_785  
Sample ID :  
Data Filename : t=3\_SOD\_785.gcd  
Method Filename : Methode\_Achiral\_MUC\_Integration.gcm  
Batch Filename : batch.gcb  
Vial # : 36  
Injection Volume : 5 uL  
Date Acquired : 03.07.2019 10:38:37  
Date Processed : 03.07.2019 10:59:22

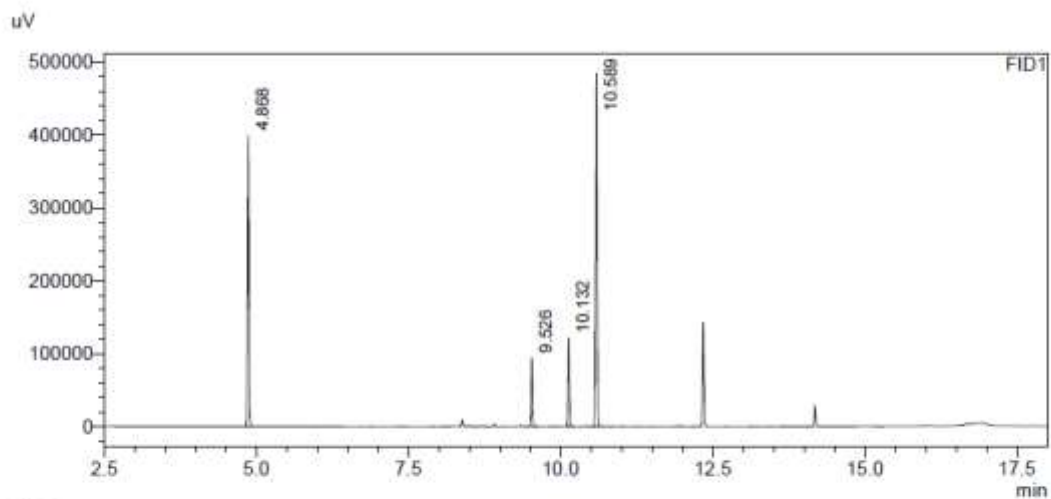

FID1

| Peak# | Ret. Time | Area    | Area%   |
|-------|-----------|---------|---------|
| 1     | 4.868     | 629954  | 37.047  |
| 2     | 9.526     | 140367  | 8.255   |
| 3     | 10.132    | 174155  | 10.242  |
| 4     | 10.589    | 755942  | 44.456  |
| Total |           | 1700418 | 100.000 |

t = 3.5 h

Sample Name : t=3.5\_SOD\_785  
Sample ID :  
Data Filename : t=3.5\_SOD\_785.gcd  
Method Filename : Methode\_Achiral\_MUC\_Integration.gcm  
Batch Filename : batch.gcb  
Vial # : 40  
Injection Volume : 5 uL  
Date Acquired : 03.07.2019 14:27:38  
Date Processed : 03.07.2019 14:48:23

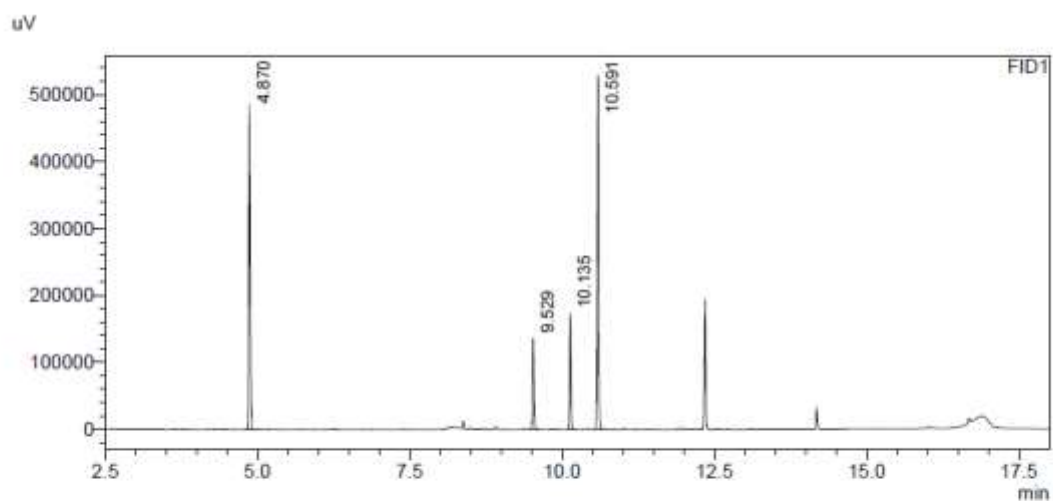

| Peak# | Ret. Time | Area    | Area%   |
|-------|-----------|---------|---------|
| 1     | 4.870     | 771528  | 37.633  |
| 2     | 9.529     | 200286  | 9.769   |
| 3     | 10.135    | 249269  | 12.159  |
| 4     | 10.591    | 829034  | 40.438  |
| Total |           | 2050117 | 100.000 |

t = 4 h

Sample Name : t=4\_SOD\_785  
Sample ID :  
Data Filename : t=4\_SOD\_785.gcd  
Method Filename : Methode\_Achiral\_MUC\_Integration.gcm  
Batch Filename : batch.gcb  
Vial # : 44  
Injection Volume : 5 uL  
Date Acquired : 03.07.2019 16:09:30  
Date Processed : 03.07.2019 16:30:15

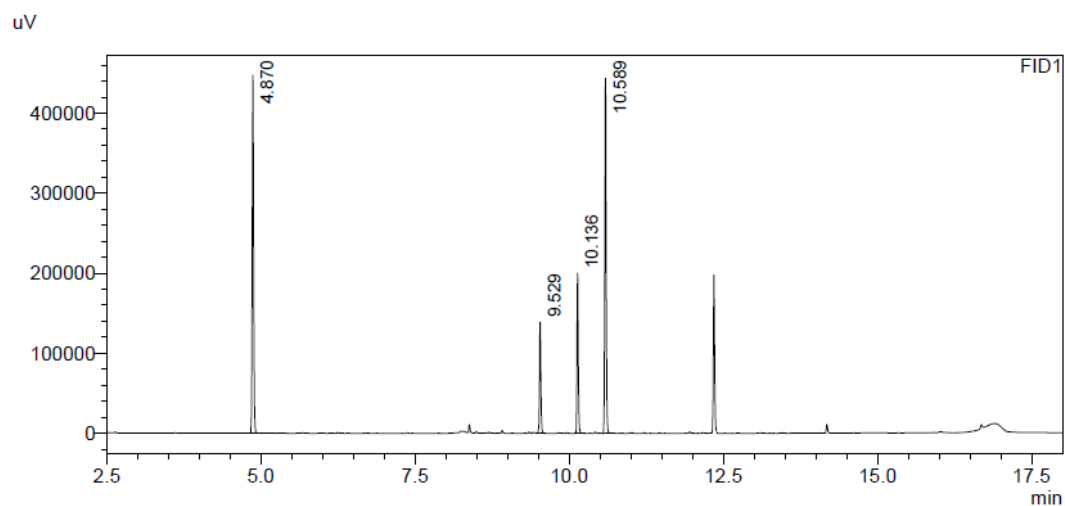

| Peak# | Ret. Time | Area    | Area%   |
|-------|-----------|---------|---------|
| 1     | 4.870     | 704554  | 37.629  |
| 2     | 9.529     | 204824  | 10.939  |
| 3     | 10.136    | 288182  | 15.391  |
| 4     | 10.589    | 674814  | 36.041  |
| Total |           | 1872374 | 100.000 |

t = 5 h

Sample Name : t=5\_SOD\_785  
Sample ID :  
Data Filename : t=5\_SOD\_785.gcd  
Method Filename : Methode\_Achiral\_MUC\_Integration.gcm  
Batch Filename : batch.gcb  
Vial # : 48  
Injection Volume : 5 uL  
Date Acquired : 03.07.2019 17:51:20  
Date Processed : 03.07.2019 18:12:06

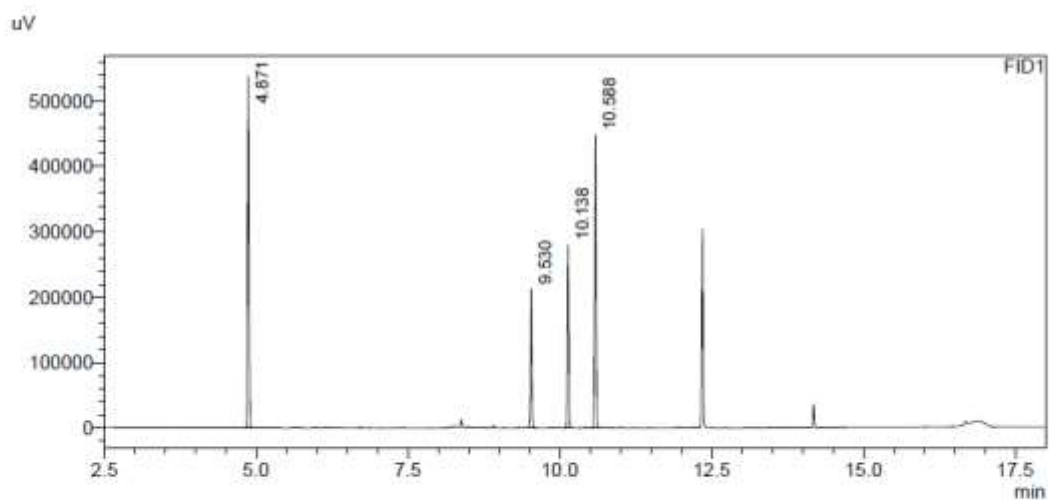

FID1

| Peak# | Ret. Time | Area    | Area%   |
|-------|-----------|---------|---------|
| 1     | 4.871     | 859939  | 37.839  |
| 2     | 9.530     | 317041  | 13.950  |
| 3     | 10.138    | 413145  | 18.179  |
| 4     | 10.588    | 682506  | 30.032  |
| Total |           | 2272631 | 100.000 |

t = 6 h

Sample Name : t=6\_SOD\_785  
Sample ID :  
Data Filename : t=6\_SOD\_785.gcd  
Method Filename : Methode\_Achiral\_MUC\_Integration.gcm  
Batch Filename : batch.gcb  
Vial # : 52  
Injection Volume : 5 uL  
Date Acquired : 03.07.2019 19:33:13  
Date Processed : 03.07.2019 19:53:57

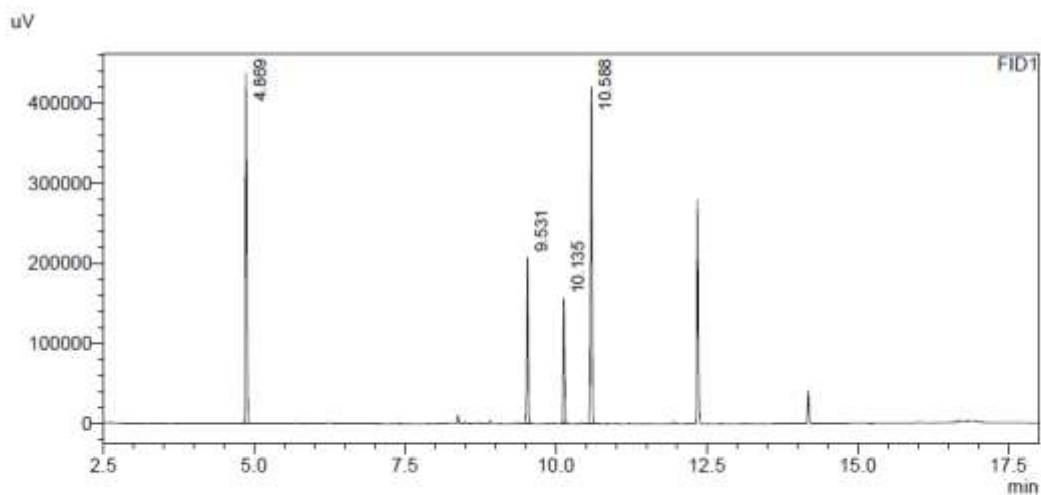

FID1

| Peak# | Ret. Time | Area    | Area%   |
|-------|-----------|---------|---------|
| 1     | 4.869     | 692590  | 37.184  |
| 2     | 9.531     | 308649  | 16.571  |
| 3     | 10.135    | 224371  | 12.046  |
| 4     | 10.588    | 636982  | 34.199  |
| Total |           | 1862593 | 100.000 |

t = 7 h

Sample Name : t=7\_SOD\_785  
Sample ID :  
Data Filename : t=7\_SOD\_785.gcd  
Method Filename : Methode\_Achiral\_MUC\_Integration.gcm  
Batch Filename : batch.gcb  
Vial # : 56  
Injection Volume : 5 uL  
Date Acquired : 03.07.2019 21:15:04  
Date Processed : 03.07.2019 21:35:47

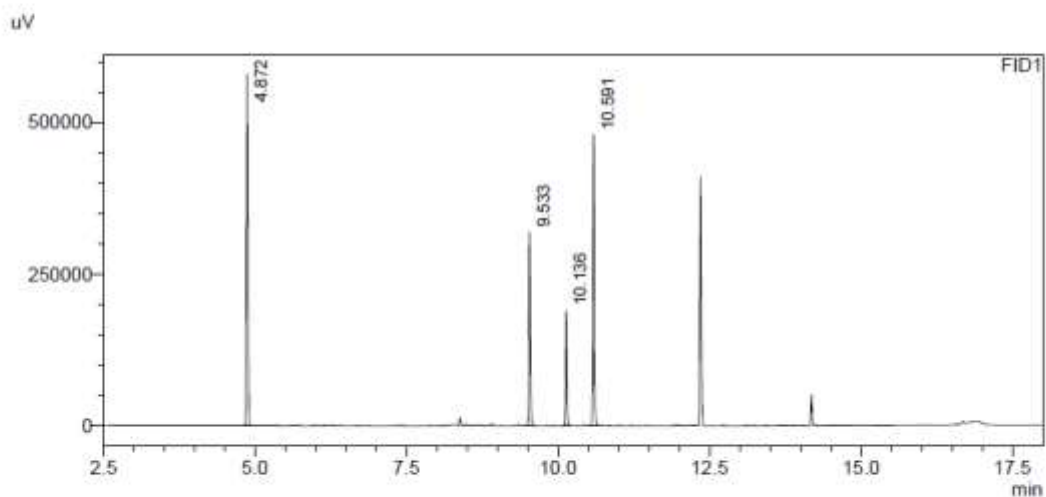

| Peak# | Ret. Time | Area    | Area%   |
|-------|-----------|---------|---------|
| 1     | 4.872     | 916844  | 37.843  |
| 2     | 9.533     | 477791  | 19.721  |
| 3     | 10.136    | 267665  | 11.048  |
| 4     | 10.591    | 760470  | 31.388  |
| Total |           | 2422770 | 100.000 |



t = 8 h

Sample Name : t=8\_SOD\_785  
Sample ID :  
Data Filename : t=8\_SOD\_785.gcd  
Method Filename : Methode\_Achiral\_MUC\_Integration.gcm  
Batch Filename : batch.gcb  
Vial # : 60  
Injection Volume : 5 uL  
Date Acquired : 03.07.2019 22:56:59  
Date Processed : 03.07.2019 23:17:42

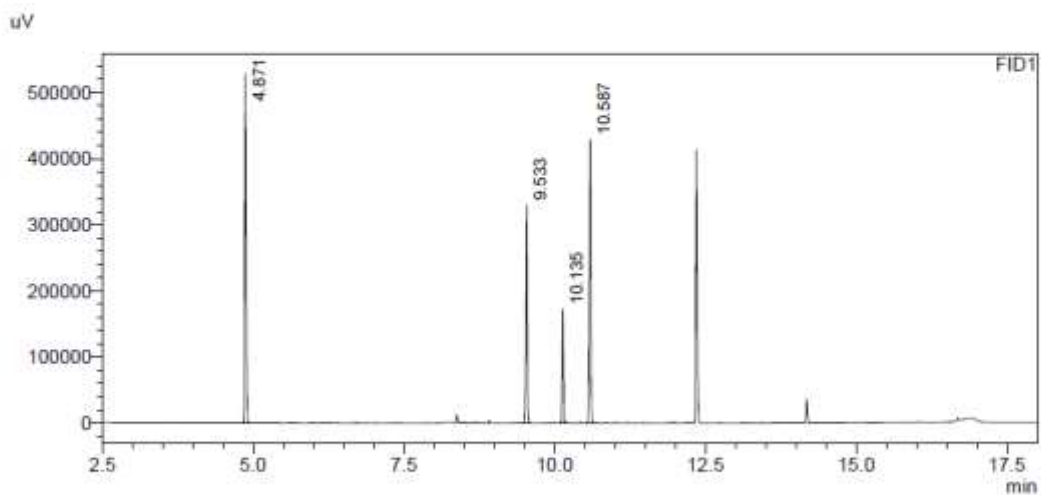

| Peak# | Ret. Time | Area    | Area%   |
|-------|-----------|---------|---------|
| 1     | 4.871     | 843488  | 37.738  |
| 2     | 9.533     | 495463  | 22.167  |
| 3     | 10.135    | 248286  | 11.108  |
| 4     | 10.587    | 647882  | 28.986  |
| Total |           | 2235119 | 100.000 |

t = 9 h

Sample Name : t=9\_SOD\_785  
Sample ID :  
Data Filename : t=9\_SOD\_785.gcd  
Method Filename : Methode\_Achiral\_MUC\_Integration.gcm  
Batch Filename : batch.gcb  
Vial # : 64  
Injection Volume : 5 uL  
Date Acquired : 04.07.2019 00:38:42  
Date Processed : 04.07.2019 00:59:26

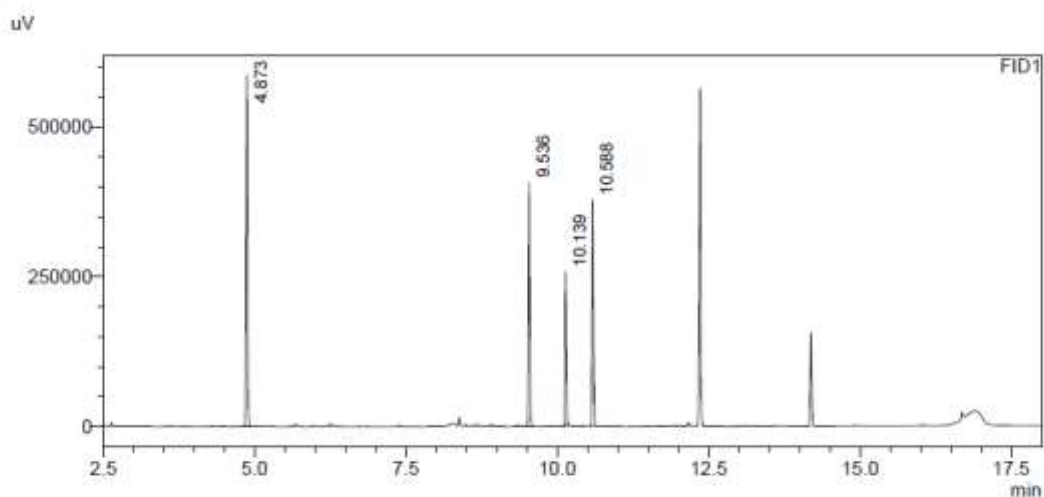

| Peak# | Ret. Time | Area    | Area%   |
|-------|-----------|---------|---------|
| 1     | 4.873     | 944396  | 37.942  |
| 2     | 9.536     | 608124  | 24.432  |
| 3     | 10.139    | 365522  | 14.685  |
| 4     | 10.588    | 571034  | 22.942  |
| Total |           | 2489077 | 100.000 |

t = 10 h

Sample Name : t=10\_SOD\_785  
Sample ID :  
Data Filename : t=10\_SOD\_785.gcd  
Method Filename : Methode\_Achiral\_MUC\_Integration.gcm  
Batch Filename : batch.gcb  
Vial # : 68  
Injection Volume : 5 uL  
Date Acquired : 04.07.2019 02:20:33  
Date Processed : 04.07.2019 02:41:17

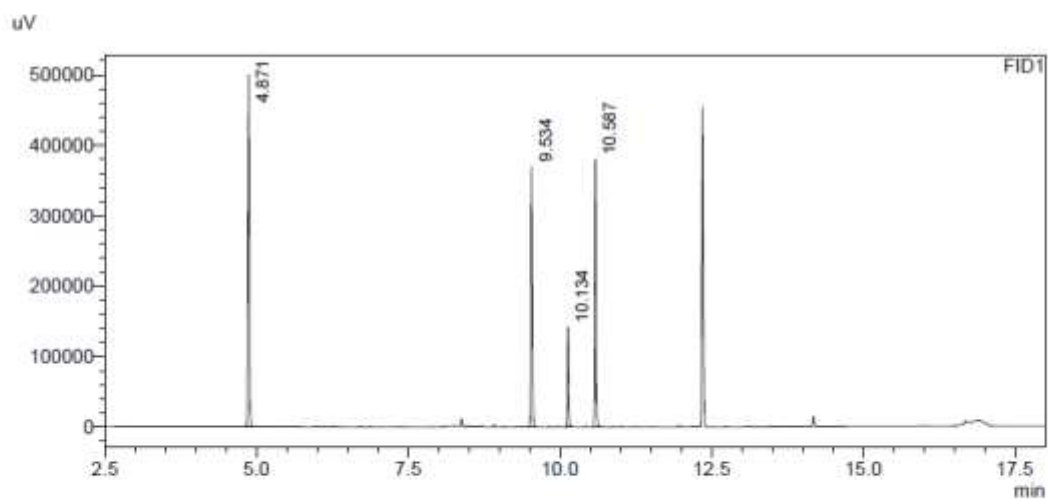

FID1

| Peak# | Ret. Time | Area    | Area%   |
|-------|-----------|---------|---------|
| 1     | 4.871     | 789442  | 37.223  |
| 2     | 9.534     | 564596  | 26.621  |
| 3     | 10.134    | 202726  | 9.559   |
| 4     | 10.587    | 564077  | 26.597  |
| Total |           | 2120841 | 100.000 |

t = 11 h

Sample Name : t=11\_SOD\_785  
Sample ID :  
Data Filename : t=11\_SOD\_785.gcd  
Method Filename : Methode\_Achiral\_MUC\_Integration.gcm  
Batch Filename : batch.gcb  
Vial # : 72  
Injection Volume : 5 uL  
Date Acquired : 04.07.2019 04:02:14  
Date Processed : 04.07.2019 04:22:57

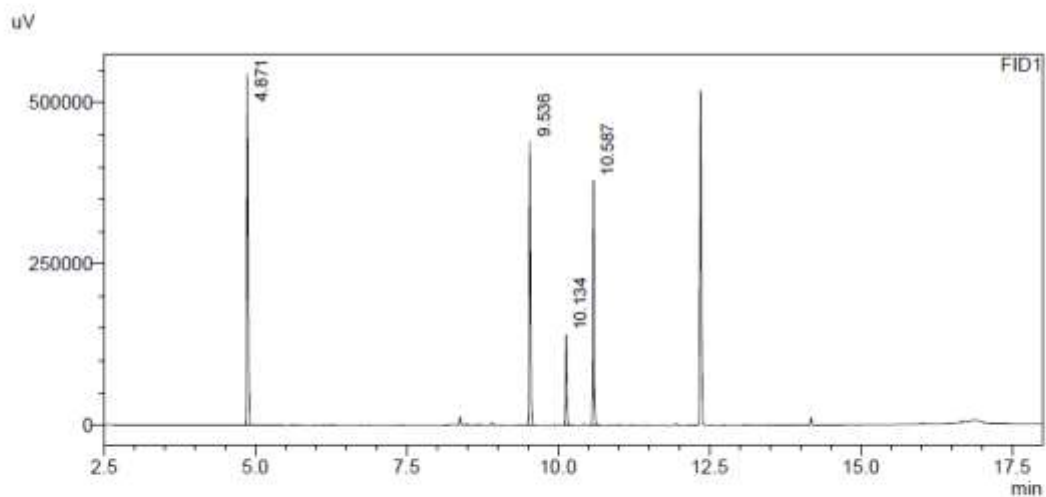

FID1

| Peak# | Ret. Time | Area    | Area%   |
|-------|-----------|---------|---------|
| 1     | 4.871     | 868031  | 37.700  |
| 2     | 9.536     | 672343  | 29.201  |
| 3     | 10.134    | 200738  | 8.718   |
| 4     | 10.587    | 561339  | 24.380  |
| Total |           | 2302451 | 100.000 |

t = 24 h

Sample Name : t=24\_SOD\_785  
Sample ID :  
Data Filename : t=24\_SOD\_785.gcd  
Method Filename : Methode\_Achiral\_MUC\_Integration.gcm  
Batch Filename : batch.gcb  
Vial # : 4  
Injection Volume : 5 uL  
Date Acquired : 22.07.2019 14:59:11  
Date Processed : 22.07.2019 15:19:55

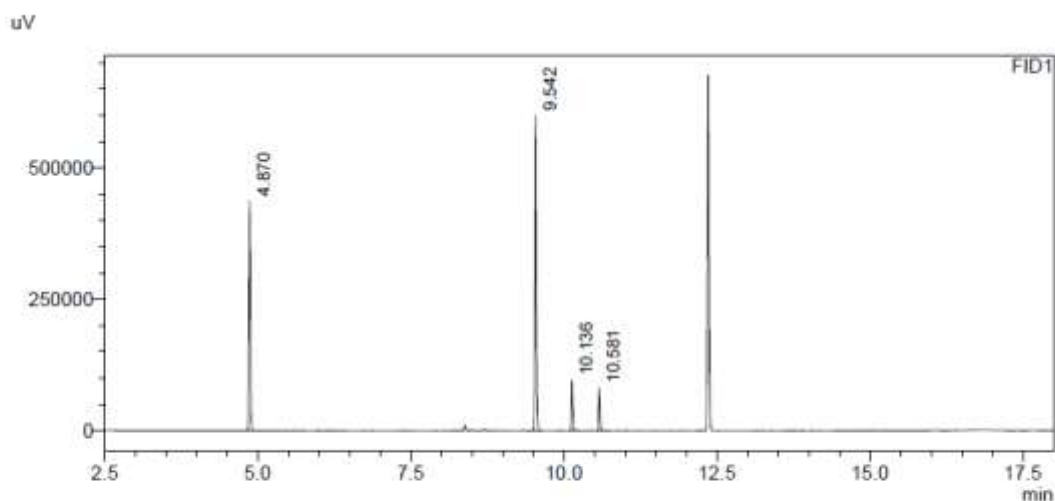

FID1

| Peak# | Ret. Time | Area    | Area%   |
|-------|-----------|---------|---------|
| 1     | 4.870     | 686427  | 36.555  |
| 2     | 9.542     | 935078  | 49.796  |
| 3     | 10.136    | 139674  | 7.438   |
| 4     | 10.581    | 116621  | 6.211   |
| Total |           | 1877801 | 100.000 |

t = 48 h

Sample Name : t=48\_SOD\_785  
Sample ID :  
Data Filename : t=48\_SOD\_785.gcd  
Method Filename : Methode\_Achiral\_MUC\_Integration.gcm  
Batch Filename : batch.gcb  
Vial # : 8  
Injection Volume : 5 uL  
Date Acquired : 22.07.2019 16:40:53  
Date Processed : 22.07.2019 17:01:37

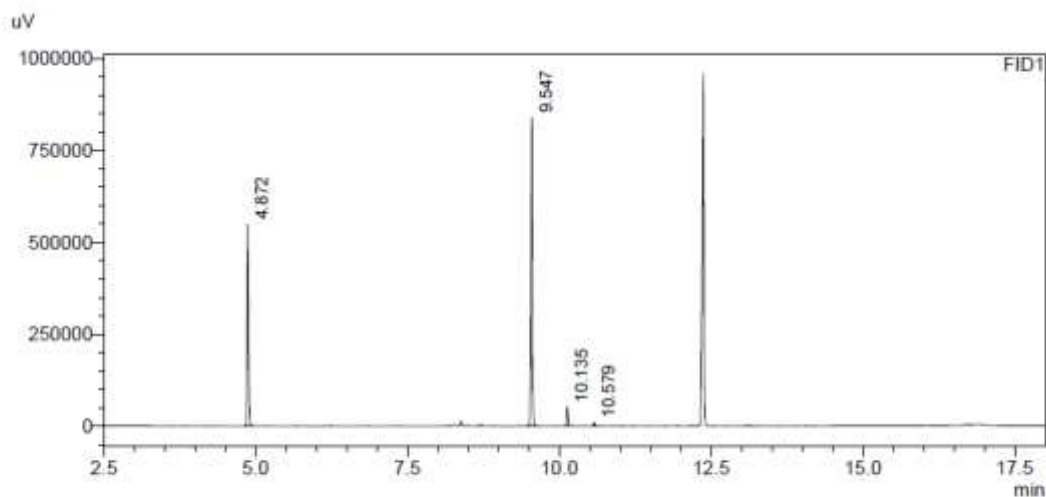

| Peak# | Ret. Time | Area    | Area%   |
|-------|-----------|---------|---------|
| 1     | 4.872     | 871888  | 36.681  |
| 2     | 9.547     | 1414179 | 59.495  |
| 3     | 10.135    | 75962   | 3.196   |
| 4     | 10.579    | 14945   | 0.629   |
| Total |           | 2376973 | 100.000 |

t = 72 h

Sample Name : t=72\_SOD\_785  
Sample ID :  
Data Filename : t=72\_SOD\_785.gcd  
Method Filename : Methode\_Achiral\_MUC\_Integration.gcm  
Batch Filename : batch.gcb  
Vial # : 12  
Injection Volume : 5 uL  
Date Acquired : 22.07.2019 18:22:43  
Date Processed : 22.07.2019 18:43:28

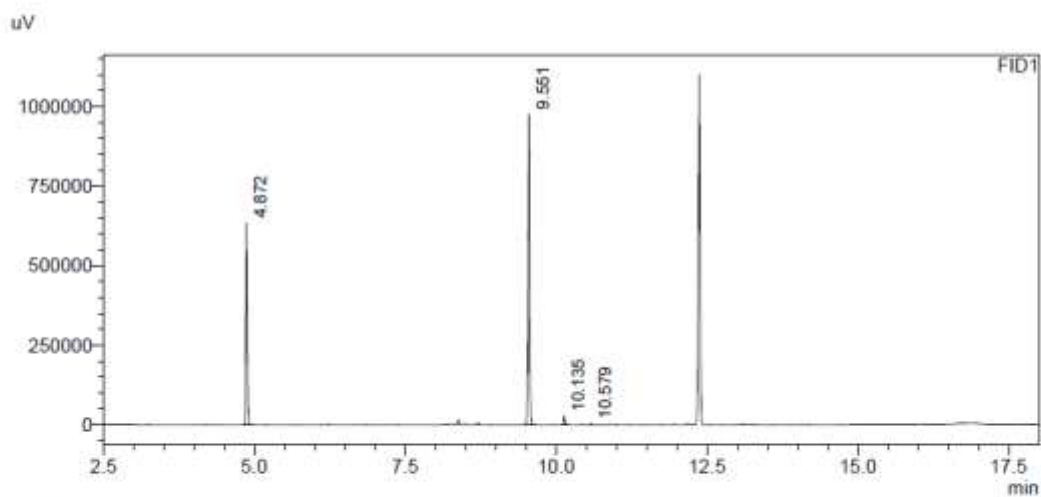

| Peak# | Ret. Time | Area    | Area%   |
|-------|-----------|---------|---------|
| 1     | 4.872     | 999537  | 36.583  |
| 2     | 9.551     | 1688589 | 61.803  |
| 3     | 10.135    | 39760   | 1.455   |
| 4     | 10.579    | 4330    | 0.158   |
| Total |           | 2732216 | 100.000 |

I, no iPrOH

t = 0 min

Sample Name : t=0\_SOD\_786  
Sample ID :  
Data Filename : t=0\_SOD\_786.gcd  
Method Filename : Methode\_Achiral\_MUC\_Integration.gcm  
Batch Filename : batch.gcb  
Vial # : 36  
Injection Volume : 5 uL  
Date Acquired : 23.07.2019 04:32:30  
Date Processed : 23.07.2019 04:53:14

uV

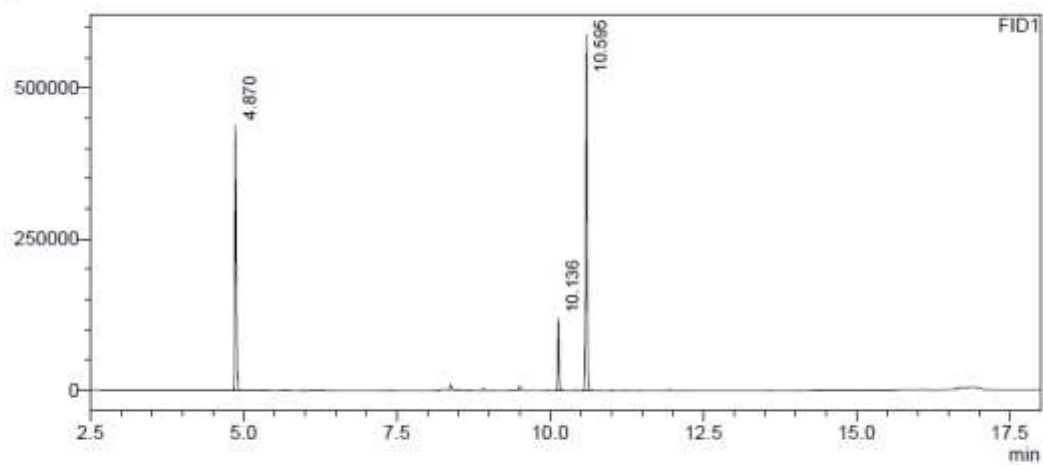

FID1

| Peak# | Ret. Time | Area    | Area%   |
|-------|-----------|---------|---------|
| 1     | 4.870     | 699419  | 39.022  |
| 2     | 10.136    | 171770  | 9.583   |
| 3     | 10.595    | 921184  | 51.395  |
| Total |           | 1792374 | 100.000 |



t = 15 min

Sample Name : t=0,25\_SOD\_786  
Sample ID :  
Data Filename : t=0,25\_SOD\_786.gcd  
Method Filename : Methode\_Achiral\_MUC\_Integration.gcm  
Batch Filename : batch.gcb  
Vial # : 42  
Injection Volume : 5 uL  
Date Acquired : 23.07.2019 07:04:57  
Date Processed : 23.07.2019 07:25:40

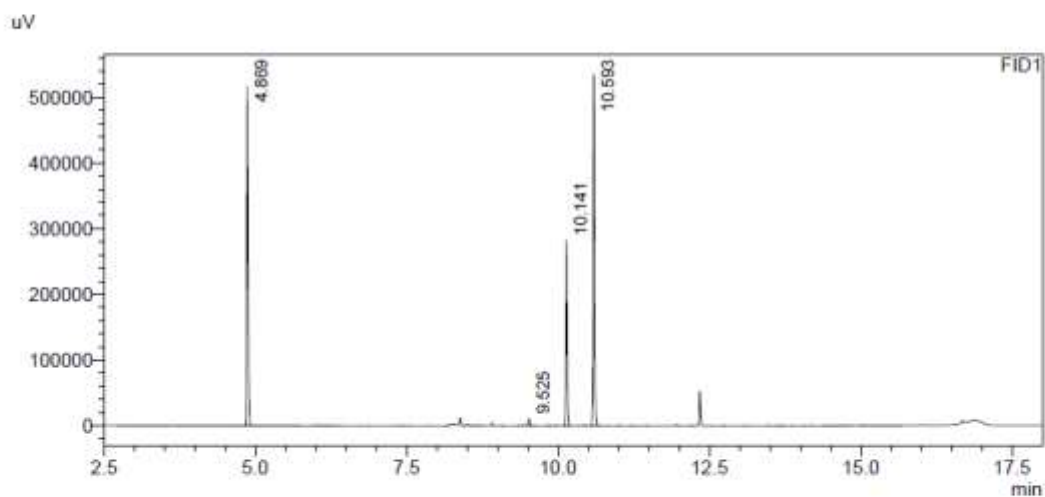

FID1

| Peak# | Ret. Time | Area    | Area%   |
|-------|-----------|---------|---------|
| 1     | 4.869     | 816267  | 38.977  |
| 2     | 9.525     | 21811   | 1.041   |
| 3     | 10.141    | 408999  | 19.530  |
| 4     | 10.593    | 847141  | 40.451  |
| Total |           | 2094217 | 100.000 |

t = 30 min

Sample Name : t=0,5\_SOD\_786  
Sample ID :  
Data Filename : t=0,5\_SOD\_786.gcd  
Method Filename : Methode\_Achiral\_MUC\_Integration.gcm  
Batch Filename : batch.gcb  
Vial # : 48  
Injection Volume : 5 uL  
Date Acquired : 23.07.2019 09:37:48  
Date Processed : 23.07.2019 09:58:31

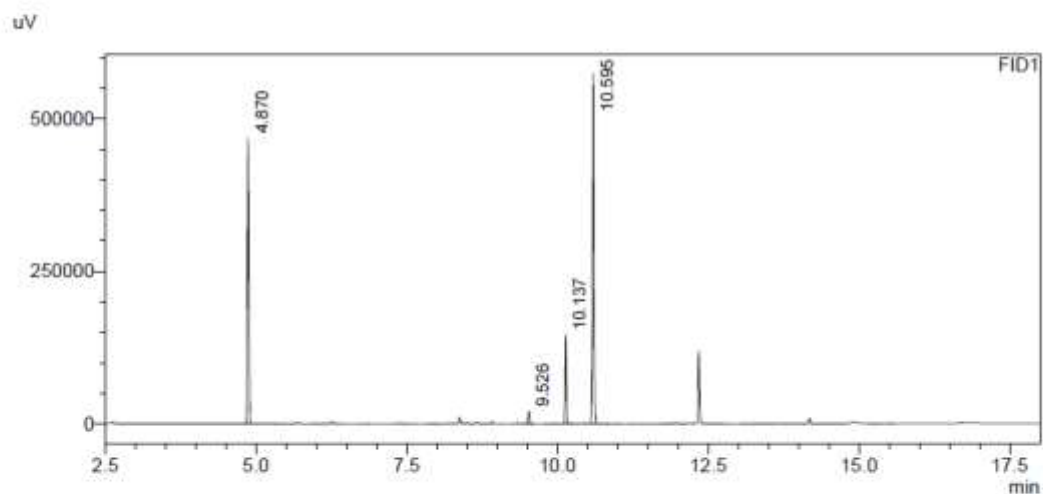

FID1

| Peak# | Ret. Time | Area    | Area%   |
|-------|-----------|---------|---------|
| 1     | 4.870     | 749358  | 39.053  |
| 2     | 9.526     | 36870   | 1.922   |
| 3     | 10.137    | 213821  | 11.143  |
| 4     | 10.595    | 918752  | 47.882  |
| Total |           | 1918800 | 100.000 |

t = 45 min

Sample Name : t=0,75\_SOD\_786  
Sample ID :  
Data Filename : t=0,75\_SOD\_786.gcd  
Method Filename : Methode\_Achiral\_MUC\_Integration.gcm  
Batch Filename : batch.gcb  
Vial # : 54  
Injection Volume : 5 uL  
Date Acquired : 23.07.2019 14:18:01  
Date Processed : 23.07.2019 14:38:44

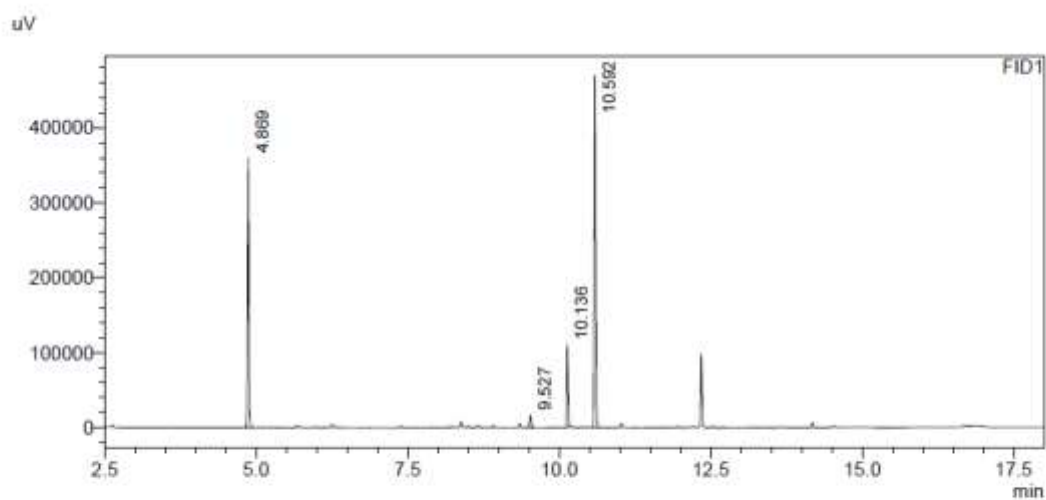

FID1

| Peak# | Ret. Time | Area    | Area%   |
|-------|-----------|---------|---------|
| 1     | 4.869     | 560124  | 38.089  |
| 2     | 9.527     | 30185   | 2.053   |
| 3     | 10.136    | 154983  | 10.539  |
| 4     | 10.592    | 725280  | 49.320  |
| Total |           | 1470573 | 100.000 |

t = 1 h

Sample Name : t=1\_SOD\_786  
Sample ID :  
Data Filename : t=1\_SOD\_786.gcd  
Method Filename : Methode\_Achiral\_MUC\_Integration.gcm  
Batch Filename : batch.gcd  
Vial # : 60  
Injection Volume : 5 uL  
Date Acquired : 23.07.2019 16:50:56  
Date Processed : 23.07.2019 17:11:40

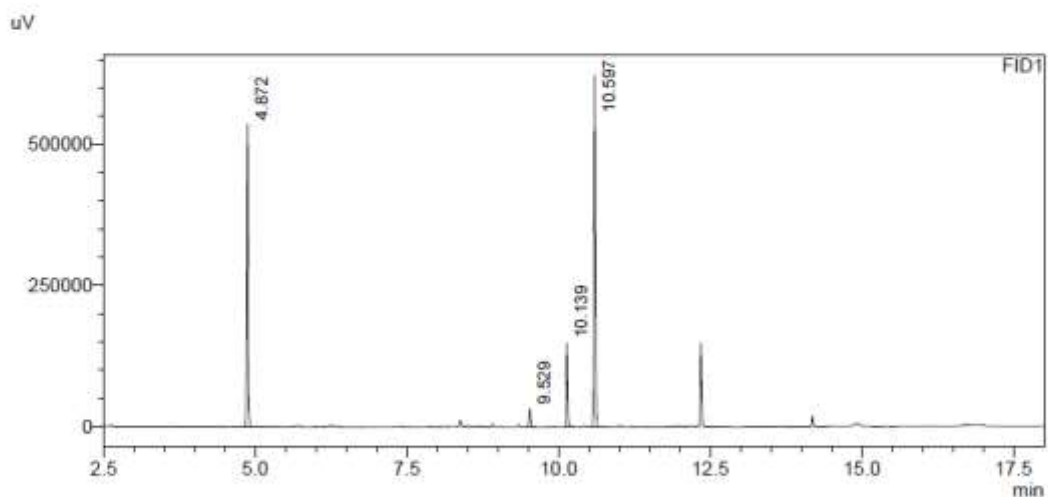

| Peak# | Ret. Time | Area    | Area%   |
|-------|-----------|---------|---------|
| 1     | 4.872     | 851530  | 39.899  |
| 2     | 9.529     | 54083   | 2.534   |
| 3     | 10.139    | 215952  | 10.118  |
| 4     | 10.597    | 1012675 | 47.449  |
| Total |           | 2134240 | 100.000 |

t = 1.5 h

Sample Name : t=1,5\_SOD\_786  
Sample ID :  
Data Filename : t=1,5\_SOD\_786.gcd  
Method Filename : Methode\_Achiral\_MUC\_Integration.gcm  
Batch Filename : batch.gcb  
Vial # : 66  
Injection Volume : 5 uL  
Date Acquired : 23.07.2019 19:24:06  
Date Processed : 23.07.2019 19:44:47

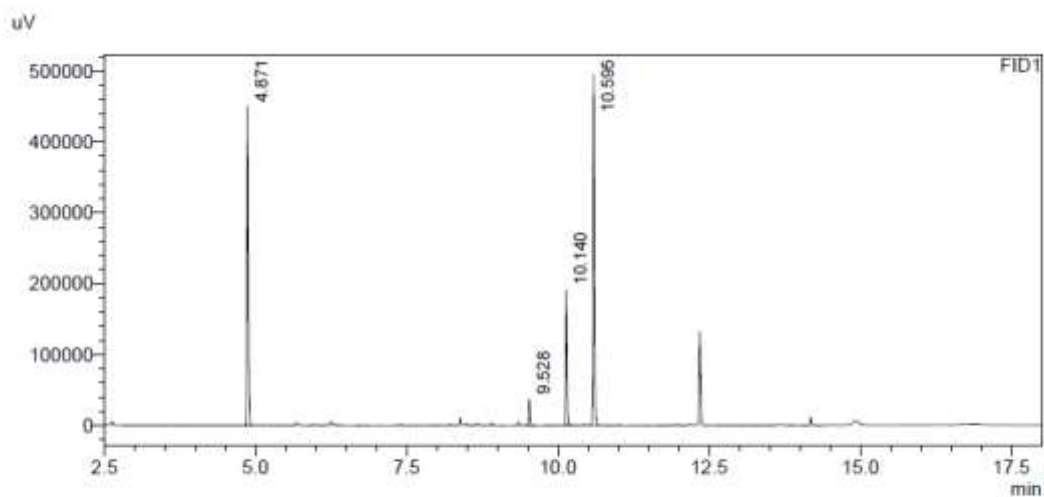

FID1

| Peak# | Ret. Time | Area    | Area%   |
|-------|-----------|---------|---------|
| 1     | 4.871     | 714253  | 38.792  |
| 2     | 9.528     | 61142   | 3.321   |
| 3     | 10.140    | 284392  | 15.446  |
| 4     | 10.595    | 781444  | 42.441  |
| Total |           | 1841231 | 100.000 |

t = 2 h

Sample Name : t=2\_SOD\_786  
Sample ID :  
Data Filename : t=2\_SOD\_786.gcd  
Method Filename : Methode\_Achiral\_MUC\_Integration.gcm  
Batch Filename : batch.gcb  
Vial # : 76  
Injection Volume : 5 uL  
Date Acquired : 23.07.2019 23:39:32  
Date Processed : 24.07.2019 00:00:15

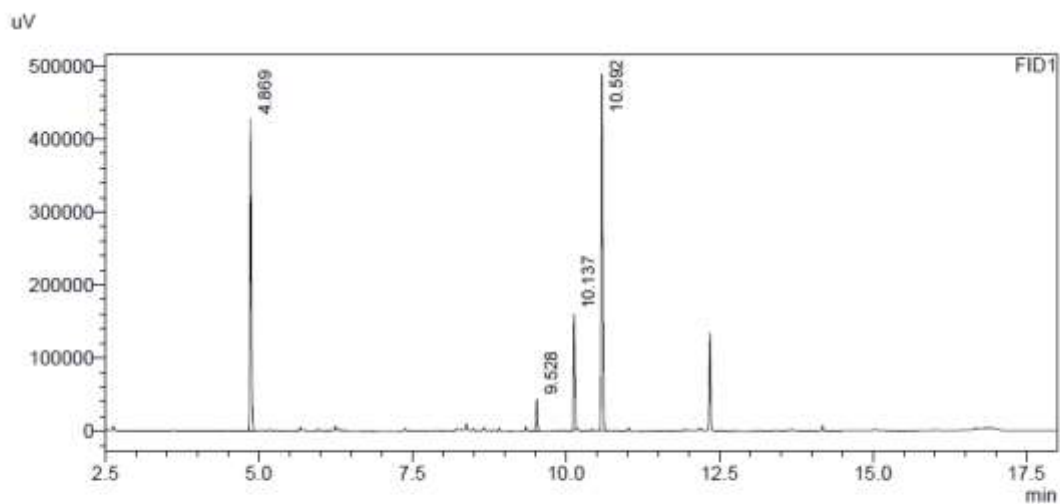

| Peak# | Ret. Time | Area    | Area%   |
|-------|-----------|---------|---------|
| 1     | 4.869     | 675864  | 39.430  |
| 2     | 9.528     | 69183   | 4.036   |
| 3     | 10.137    | 227207  | 13.255  |
| 4     | 10.592    | 741813  | 43.278  |
| Total |           | 1714068 | 100.000 |

t = 2.5 h

Sample Name : t=2,5\_SOD\_786  
Sample ID :  
Data Filename : t=2,5\_SOD\_786.gcd  
Method Filename : Methode\_Achiral\_MUC\_Integration.gcm  
Batch Filename : batch.gcb  
Vial # : 82  
Injection Volume : 5 uL  
Date Acquired : 24.07.2019 02:12:40  
Date Processed : 24.07.2019 02:33:24

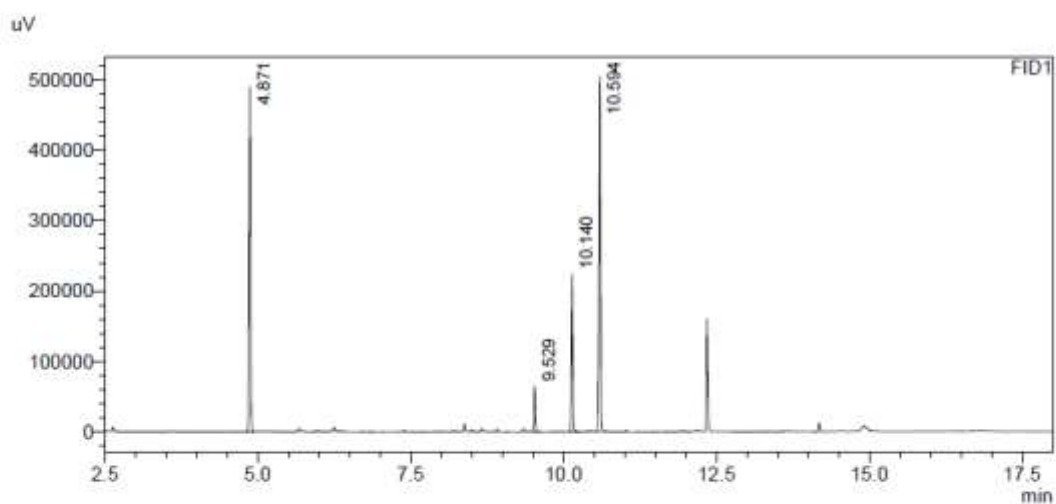

| Peak# | Ret. Time | Area    | Area%   |
|-------|-----------|---------|---------|
| 1     | 4.871     | 768396  | 38.739  |
| 2     | 9.529     | 100258  | 5.055   |
| 3     | 10.140    | 329307  | 16.602  |
| 4     | 10.594    | 785553  | 39.604  |
| Total |           | 1983515 | 100.000 |

t = 3 h

Sample Name : t=3\_SOD\_786  
Sample ID :  
Data Filename : t=3\_SOD\_786.gcd  
Method Filename : Methode\_Achiral\_MUC\_Integration.gcm  
Batch Filename : batch.gcb  
Vial # : 88  
Injection Volume : 5 uL  
Date Acquired : 24.07.2019 04:45:21  
Date Processed : 24.07.2019 05:06:05

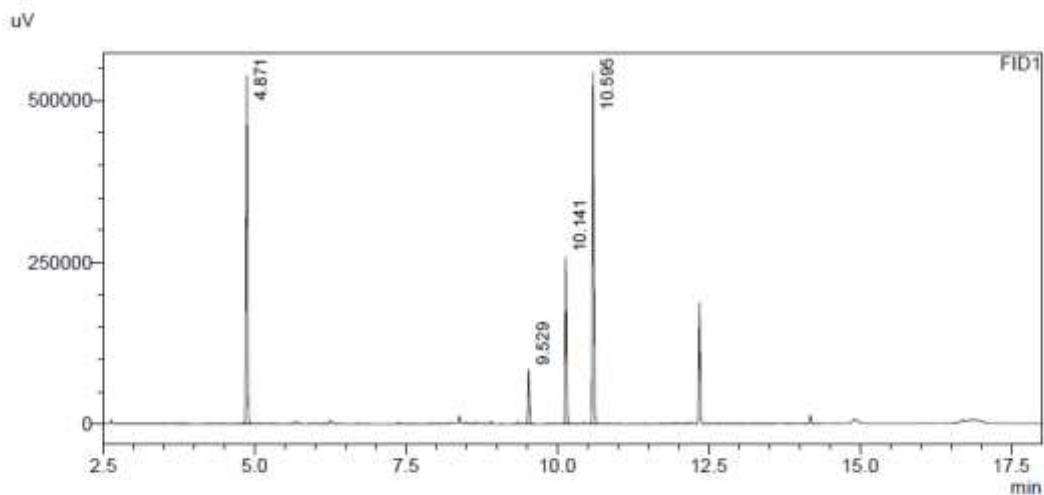

FID1

| Peak# | Ret. Time | Area    | Area%   |
|-------|-----------|---------|---------|
| 1     | 4.871     | 853724  | 38.799  |
| 2     | 9.529     | 129380  | 5.880   |
| 3     | 10.141    | 375418  | 17.062  |
| 4     | 10.595    | 841851  | 38.259  |
| Total |           | 2200372 | 100.000 |



t = 3.5 h

Sample Name : t=3,5\_SOD\_786  
Sample ID :  
Data Filename : t=3,5\_SOD\_786.gcd  
Method Filename : Methode\_Achiral\_MUC\_Integration.gcm  
Batch Filename : batch.gcb  
Vial # : 94  
Injection Volume : 5 uL  
Date Acquired : 24.07.2019 07:18:15  
Date Processed : 24.07.2019 07:38:59

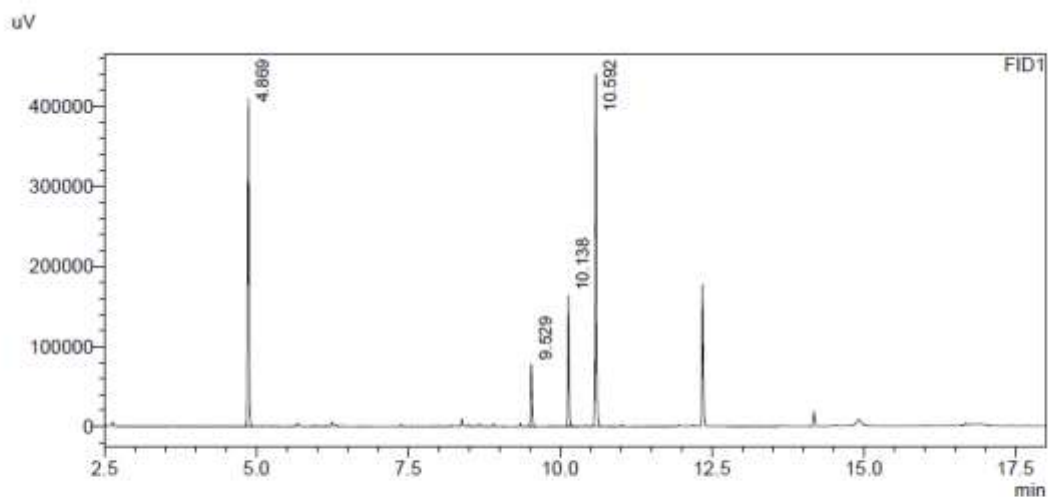

FID1

| Peak# | Ret. Time | Area    | Area%   |
|-------|-----------|---------|---------|
| 1     | 4.869     | 649907  | 38.535  |
| 2     | 9.529     | 117806  | 6.985   |
| 3     | 10.138    | 234802  | 13.922  |
| 4     | 10.592    | 684025  | 40.558  |
| Total |           | 1686540 | 100.000 |

t = 4 h

Sample Name : t=4\_SOD\_786  
Sample ID :  
Data Filename : t=4\_SOD\_786.gcd  
Method Filename : Methode\_Achiral\_MUC\_Integration.gcm  
Batch Filename : batch.gcb  
Vial # : 100  
Injection Volume : 5 uL  
Date Acquired : 24.07.2019 09:51:34  
Date Processed : 24.07.2019 10:12:18

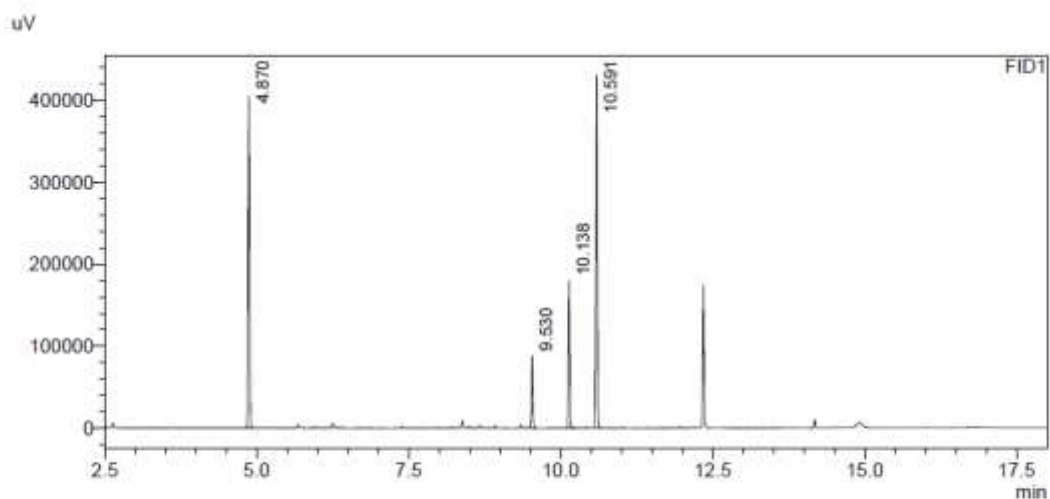

| Peak# | Ret. Time | Area    | Area%   |
|-------|-----------|---------|---------|
| 1     | 4.870     | 649395  | 38.181  |
| 2     | 9.530     | 132928  | 7.815   |
| 3     | 10.138    | 262308  | 15.422  |
| 4     | 10.591    | 656190  | 38.581  |
| Total |           | 1700821 | 100.000 |

t = 5 h

Sample Name : t=5\_SOD\_786  
Sample ID :  
Data Filename : t=5\_SOD\_786.gcd  
Method Filename : Methode\_Achiral\_MUC\_Integration.gcm  
Batch Filename : batch.gcb  
Vial # : 106  
Injection Volume : 5 uL  
Date Acquired : 24.07.2019 12:50:20  
Date Processed : 24.07.2019 13:11:03

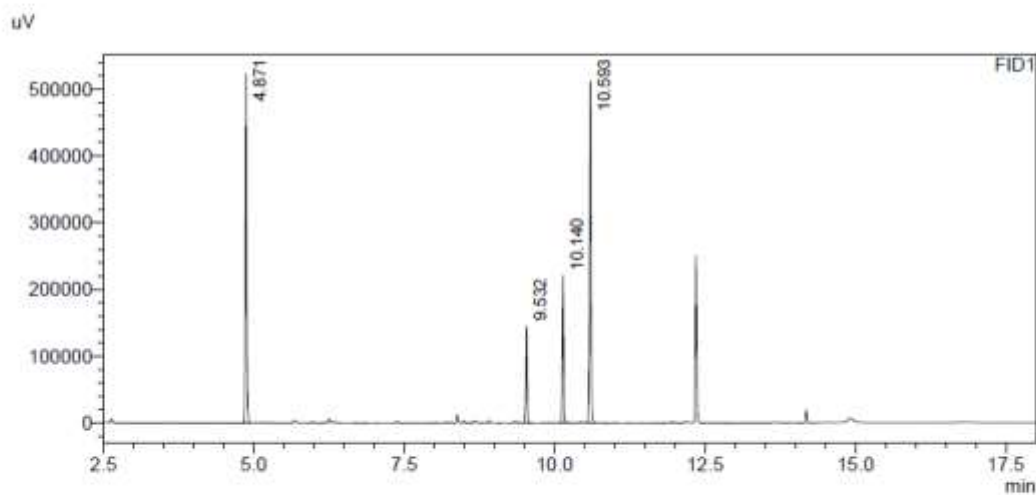

FID1

| Peak# | Ret. Time | Area    | Area%   |
|-------|-----------|---------|---------|
| 1     | 4.871     | 830317  | 38.215  |
| 2     | 9.532     | 217166  | 9.995   |
| 3     | 10.140    | 319112  | 14.687  |
| 4     | 10.593    | 806139  | 37.103  |
| Total |           | 2172735 | 100.000 |

t = 6 h

Sample Name : t=6\_SOD\_786  
Sample ID :  
Data Filename : t=6\_SOD\_786.gcd  
Method Filename : Methode\_Achiral\_MUC\_Integration.gcm  
Batch Filename : batch.gcb  
Vial # : 132  
Injection Volume : 5 uL  
Date Acquired : 25.07.2019 03:18:11  
Date Processed : 25.07.2019 03:38:55

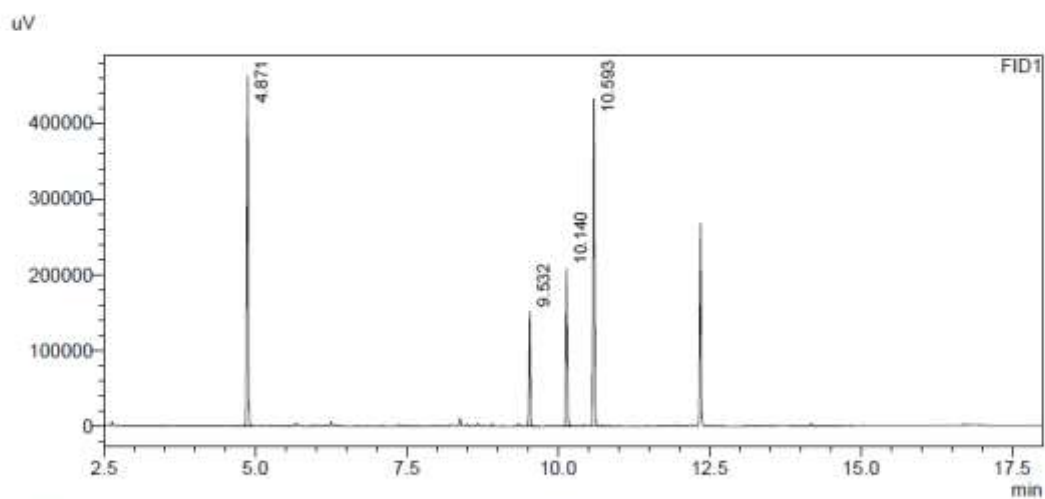

FID1

| Peak# | Ret. Time | Area    | Area%   |
|-------|-----------|---------|---------|
| 1     | 4.871     | 729649  | 38.126  |
| 2     | 9.532     | 221862  | 11.593  |
| 3     | 10.140    | 301561  | 15.757  |
| 4     | 10.593    | 660713  | 34.524  |
| Total |           | 1913785 | 100.000 |

t = 7 h

Sample Name : t=7\_SOD\_786  
Sample ID :  
Data Filename : t=7\_SOD\_786.gcd  
Method Filename : Methode\_Achiral\_MUC\_Integration.gcm  
Batch Filename : batch.gcb  
Vial # : 138  
Injection Volume : 5 uL  
Date Acquired : 25.07.2019 05:50:42  
Date Processed : 25.07.2019 06:11:27

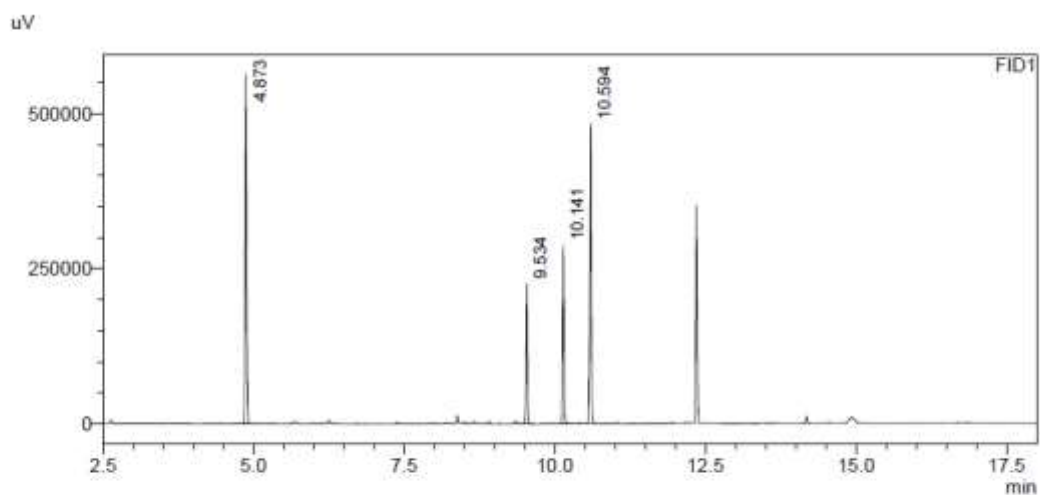

FID1

| Peak# | Ret. Time | Area    | Area%   |
|-------|-----------|---------|---------|
| 1     | 4.873     | 896774  | 37.200  |
| 2     | 9.534     | 333863  | 13.849  |
| 3     | 10.141    | 421177  | 17.471  |
| 4     | 10.594    | 758839  | 31.479  |
| Total |           | 2410653 | 100.000 |

t = 8 h

Sample Name : t=8\_SOD\_786  
Sample ID :  
Data Filename : t=8\_SOD\_786.gcd  
Method Filename : Methode\_Achiral\_MUC\_Integration.gcm  
Batch Filename : batch.gcb  
Vial # : 1  
Injection Volume : 5 uL  
Date Acquired : 25.07.2019 08:23:14  
Date Processed : 25.07.2019 08:43:57

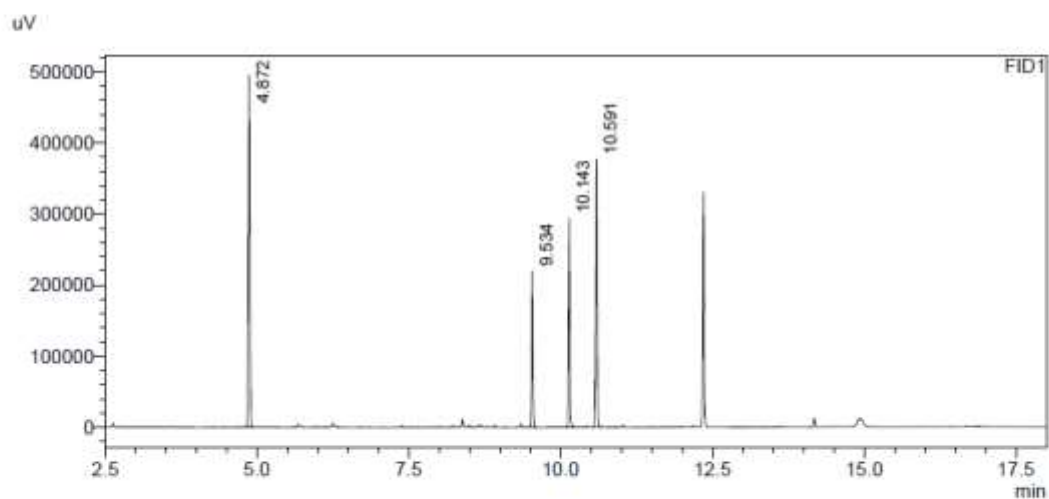

| Peak# | Ret. Time | Area    | Area%   |
|-------|-----------|---------|---------|
| 1     | 4.872     | 781810  | 37.409  |
| 2     | 9.534     | 318573  | 15.243  |
| 3     | 10.143    | 422641  | 20.223  |
| 4     | 10.591    | 566891  | 27.125  |
| Total |           | 2089914 | 100.000 |

t = 9 h

Sample Name : t=9\_SOD\_786  
Sample ID :  
Data Filename : t=9\_SOD\_786.gcd  
Method Filename : Methode\_Achiral\_MUC\_Integration.gcm  
Batch Filename : batch.gcb  
Vial # : 7  
Injection Volume : 5 uL  
Date Acquired : 25.07.2019 10:56:10  
Date Processed : 25.07.2019 11:16:54

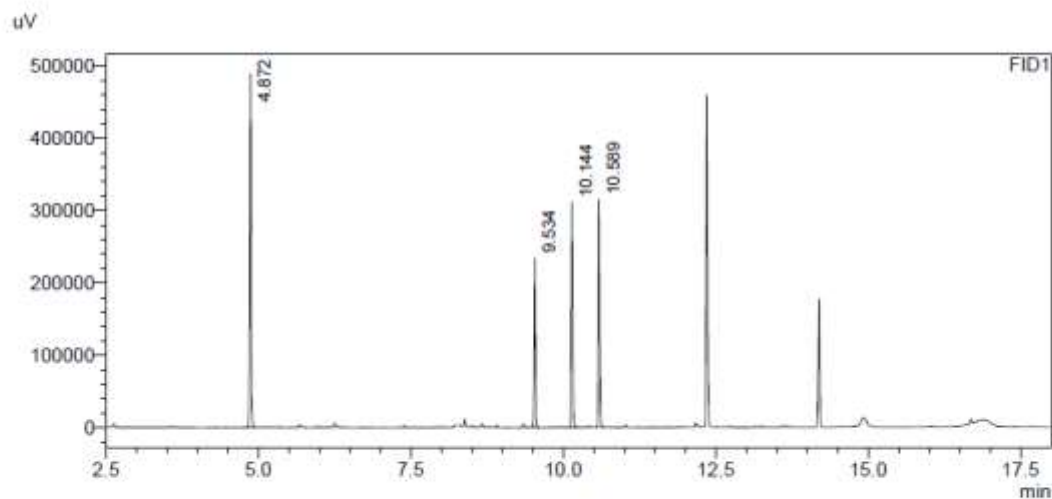

FID1

| Peak# | Ret. Time | Area    | Area%   |
|-------|-----------|---------|---------|
| 1     | 4.872     | 769258  | 37.871  |
| 2     | 9.534     | 337586  | 16.619  |
| 3     | 10.144    | 466930  | 22.987  |
| 4     | 10.589    | 457505  | 22.523  |
| Total |           | 2031279 | 100.000 |

t = 10 h

Sample Name : t=10\_SOD\_786  
Sample ID :  
Data Filename : t=10\_SOD\_786.gcd  
Method Filename : Methode\_Achiral\_MUC\_Integration.gcm  
Batch Filename : batch.gcb  
Vial # : 13  
Injection Volume : 5 uL  
Date Acquired : 25.07.2019 13:29:12  
Date Processed : 25.07.2019 13:49:54

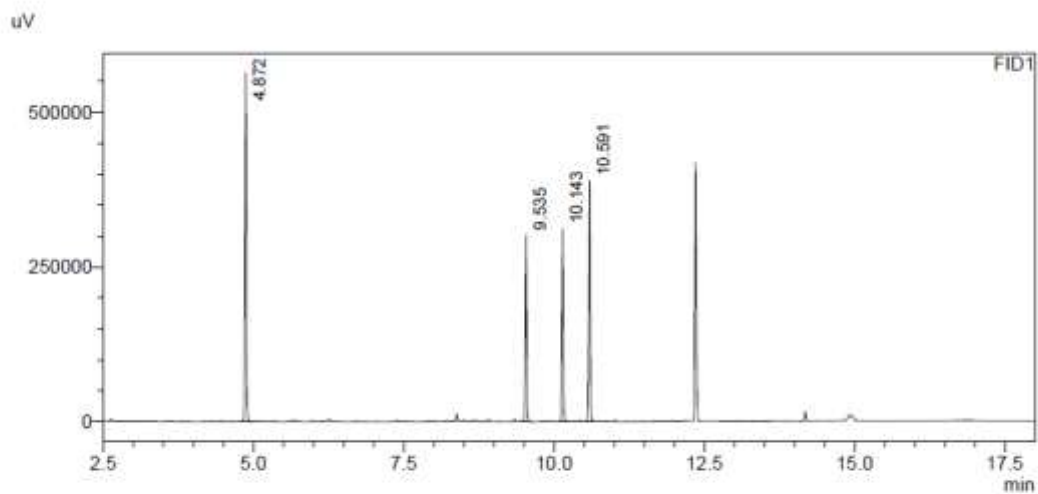

FID1

| Peak# | Ret. Time | Area    | Area%   |
|-------|-----------|---------|---------|
| 1     | 4.872     | 894813  | 37.447  |
| 2     | 9.535     | 447338  | 18.721  |
| 3     | 10.143    | 463787  | 19.409  |
| 4     | 10.591    | 583622  | 24.424  |
| Total |           | 2389560 | 100.000 |



t = 11 h

Sample Name : t=11\_SOD\_786  
Sample ID :  
Data Filename : t=11\_SOD\_786.gcd  
Method Filename : Methode\_Achiral\_MUC\_Integration.gcm  
Batch Filename : batch.gcd  
Vial # : 19  
Injection Volume : 5 uL  
Date Acquired : 25.07.2019 18:09:54  
Date Processed : 25.07.2019 18:30:38

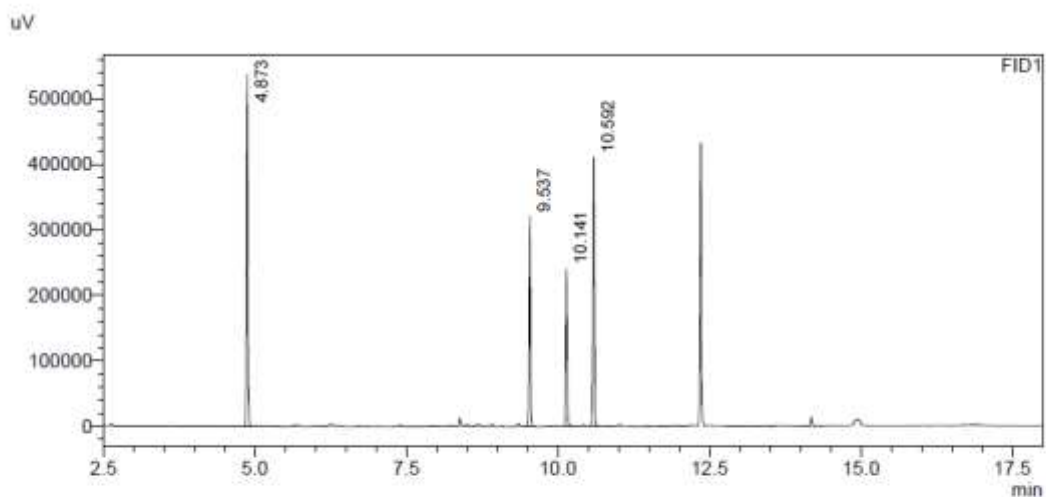

FID1

| Peak# | Ret. Time | Area    | Area%   |
|-------|-----------|---------|---------|
| 1     | 4.873     | 855315  | 37.252  |
| 2     | 9.537     | 470492  | 20.492  |
| 3     | 10.141    | 351921  | 15.328  |
| 4     | 10.592    | 618274  | 26.928  |
| Total |           | 2296002 | 100.000 |

t = 24 h

Sample Name : t=24\_SOD\_786  
Sample ID :  
Data Filename : t=24\_SOD\_786.gcd  
Method Filename : Methode\_Achiral\_MUC\_Integration.gcm  
Batch Filename : batch.gcb  
Vial # : 25  
Injection Volume : 5 uL  
Date Acquired : 25.07.2019 20:42:57  
Date Processed : 25.07.2019 21:03:41

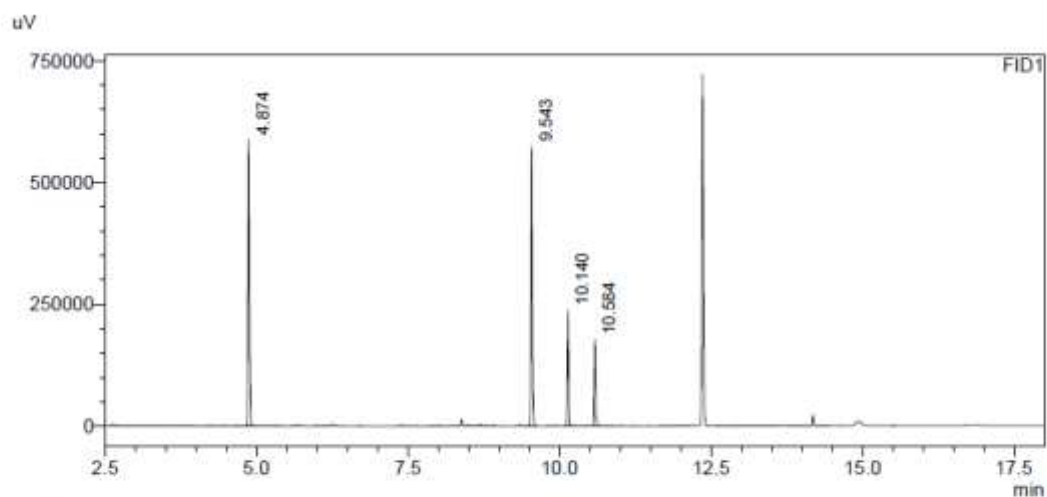

FID1

| Peak# | Ret. Time | Area    | Area%   |
|-------|-----------|---------|---------|
| 1     | 4.874     | 943634  | 38.435  |
| 2     | 9.543     | 905064  | 36.864  |
| 3     | 10.140    | 352764  | 14.368  |
| 4     | 10.584    | 253679  | 10.333  |
| Total |           | 2455142 | 100.000 |

t = 48 h

Sample Name : t=48\_SOD\_786  
Sample ID :  
Data Filename : t=48\_SOD\_786.gcd  
Method Filename : Methode\_Achiral\_MUC\_Integration.gcm  
Batch Filename : batch.gcb  
Vial # : 31  
Injection Volume : 5 uL  
Date Acquired : 25.07.2019 23:41:41  
Date Processed : 26.07.2019 00:02:24

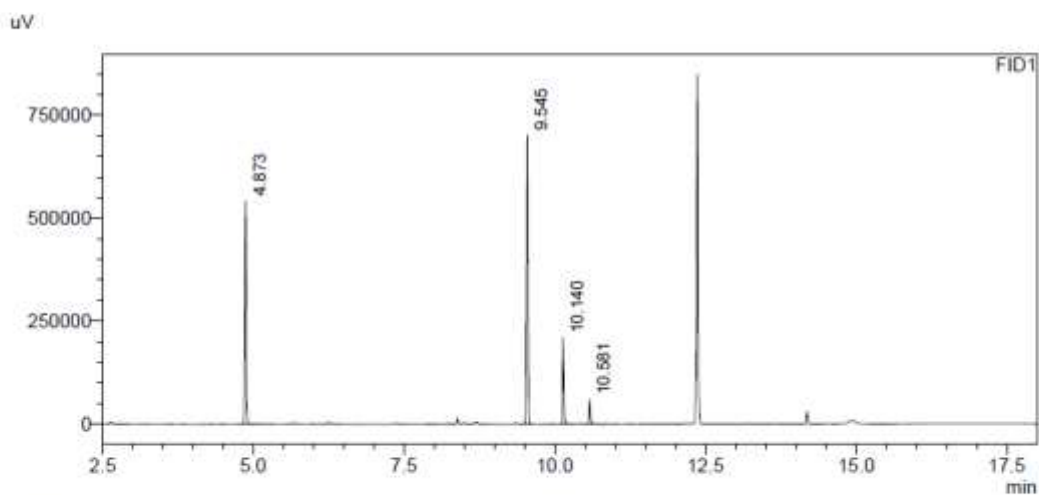

FID1

| Peak# | Ret. Time | Area    | Area%   |
|-------|-----------|---------|---------|
| 1     | 4.873     | 876502  | 36.780  |
| 2     | 9.545     | 1116133 | 46.836  |
| 3     | 10.140    | 304052  | 12.759  |
| 4     | 10.581    | 86392   | 3.625   |
| Total |           | 2383079 | 100.000 |

t = 72 h

Sample Name : t=72\_SOD\_786  
Sample ID :  
Data Filename : t=72\_SOD\_786.gcd  
Method Filename : Methode\_Achiral\_MUC\_Integration.gcm  
Batch Filename : batch.gcb  
Vial # : 37  
Injection Volume : 5 uL  
Date Acquired : 26.07.2019 02:14:42  
Date Processed : 26.07.2019 02:35:25

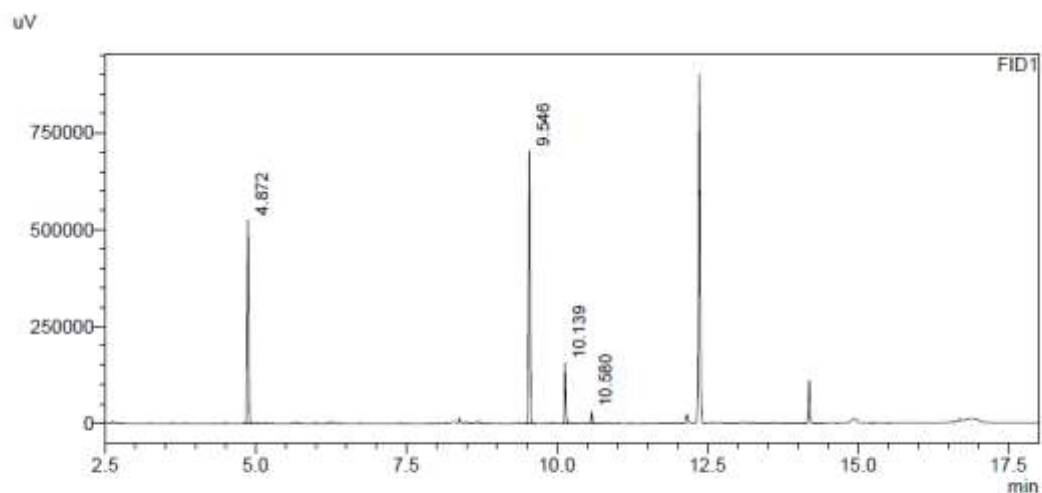

FID1

| Peak# | Ret. Time | Area    | Area%   |
|-------|-----------|---------|---------|
| 1     | 4.872     | 841951  | 37.618  |
| 2     | 9.546     | 1128850 | 50.437  |
| 3     | 10.139    | 222503  | 9.941   |
| 4     | 10.580    | 44839   | 2.003   |
| Total |           | 2238142 | 100.000 |

No I, iPrOH

t = 0 min

Sample Name : t=0\_SOD\_790  
Sample ID :  
Data Filename : t=0\_SOD\_790.gcd  
Method Filename : Methode\_Achiral\_MUC\_Integration.gcm  
Batch Filename : batch.gcb  
Vial # : 40  
Injection Volume : 5 uL  
Date Acquired : 23.07.2019 06:14:09  
Date Processed : 23.07.2019 06:34:51

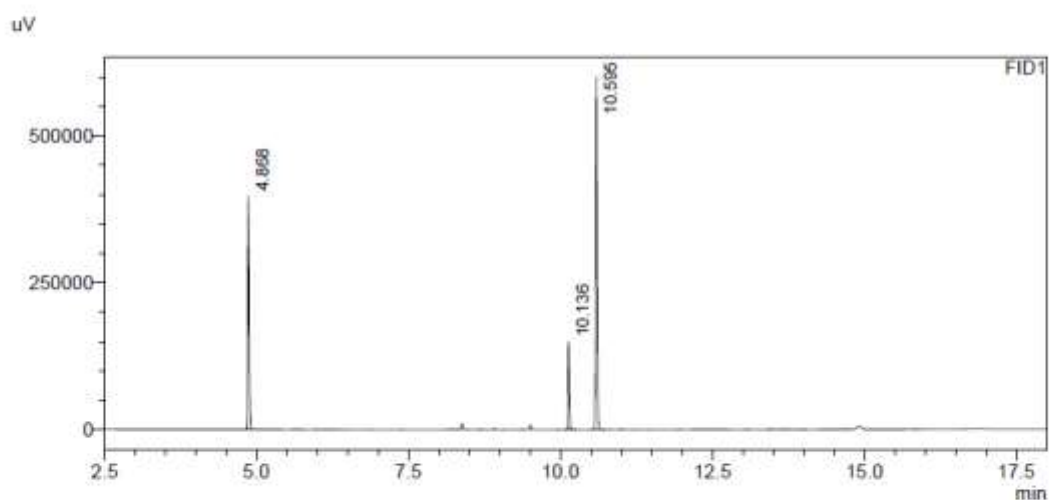

| Peak# | Ret. Time | Area    | Area%   |
|-------|-----------|---------|---------|
| 1     | 4.868     | 621428  | 34.638  |
| 2     | 10.136    | 215924  | 12.036  |
| 3     | 10.595    | 956702  | 53.326  |
| Total |           | 1794054 | 100.000 |

t = 15 min

Sample Name : t=0.25\_SOD\_790  
Sample ID :  
Data Filename : t=0.25\_SOD\_790.gcd  
Method Filename : Methode\_Achiral\_MUC\_Integration.gcm  
Batch Filename : batch.gcb  
Vial # : 46  
Injection Volume : 5 uL  
Date Acquired : 23.07.2019 08:46:54  
Date Processed : 23.07.2019 09:07:38

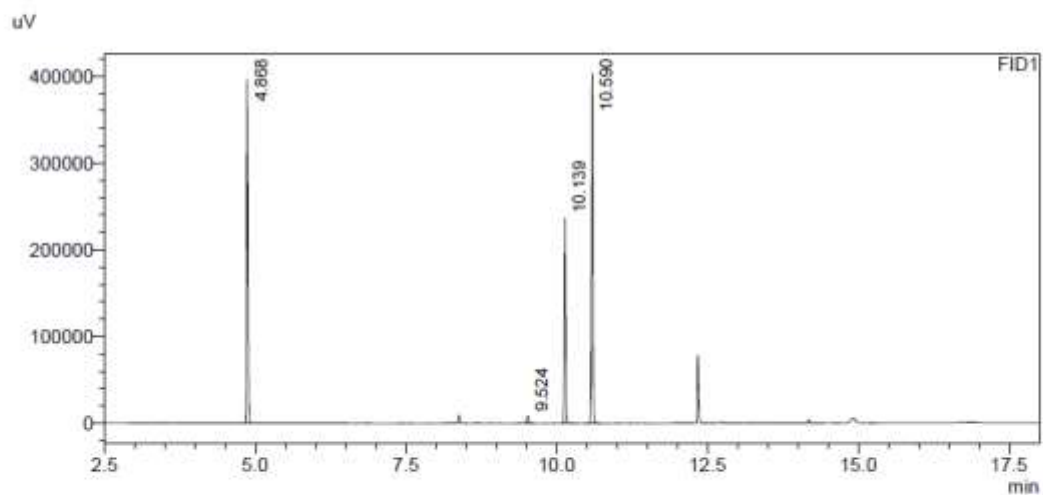

FID1

| Peak# | Ret. Time | Area    | Area%   |
|-------|-----------|---------|---------|
| 1     | 4.868     | 634561  | 39.495  |
| 2     | 9.524     | 19372   | 1.206   |
| 3     | 10.139    | 340509  | 21.193  |
| 4     | 10.590    | 612247  | 38.106  |
| Total |           | 1606690 | 100.000 |

t = 30 min

Sample Name : t=0,5\_SOD\_790  
Sample ID :  
Data Filename : t=0,5\_SOD\_790.gcd  
Method Filename : Methode\_Achiral\_MUC\_Integration.gcm  
Batch Filename : batch.gcb  
Vial # : 52  
Injection Volume : 5 uL  
Date Acquired : 23.07.2019 11:19:46  
Date Processed : 23.07.2019 11:40:30

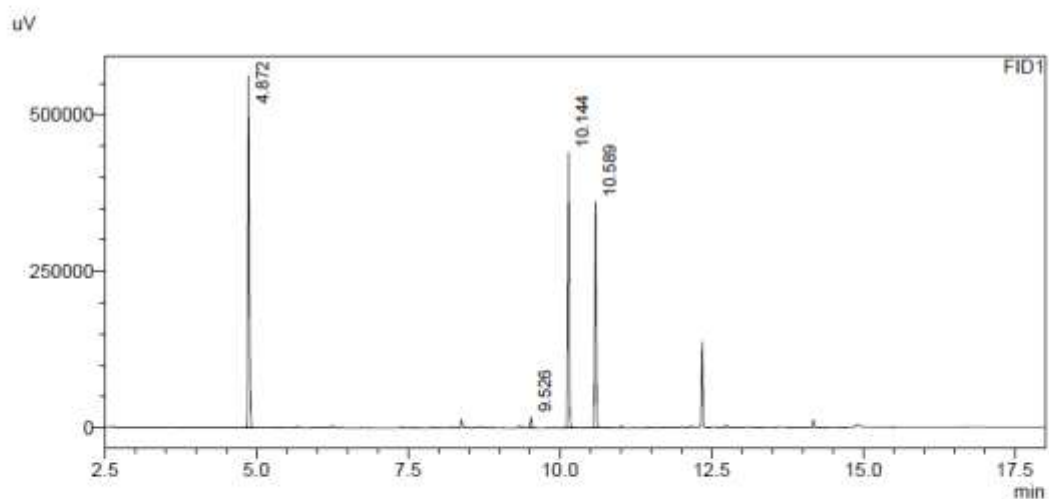

FID1

| Peak# | Ret. Time | Area    | Area%   |
|-------|-----------|---------|---------|
| 1     | 4.872     | 918587  | 42.789  |
| 2     | 9.526     | 32436   | 1.511   |
| 3     | 10.144    | 655234  | 30.522  |
| 4     | 10.589    | 540509  | 25.178  |
| Total |           | 2146767 | 100.000 |

t = 45 min

Sample Name : t=0,75\_SOD\_790  
Sample ID :  
Data Filename : t=0,75\_SOD\_790.gcd  
Method Filename : Methode\_Achiral\_MUC\_Integration.gcm  
Batch Filename : batch.gcb  
Vial # : 58  
Injection Volume : 5 uL  
Date Acquired : 23.07.2019 15:59:56  
Date Processed : 23.07.2019 16:20:40

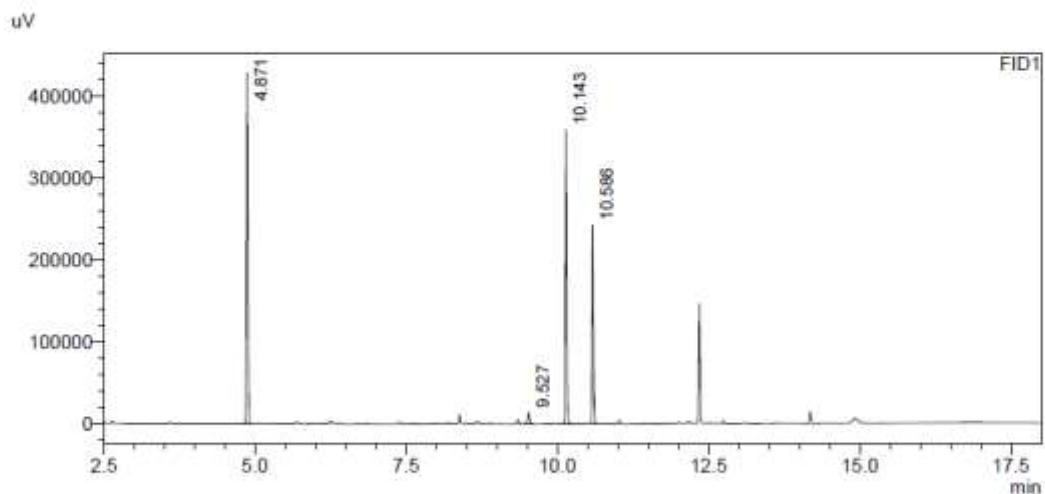

FID1

| Peak# | Ret. Time | Area    | Area%   |
|-------|-----------|---------|---------|
| 1     | 4.871     | 671860  | 42.570  |
| 2     | 9.527     | 26684   | 1.691   |
| 3     | 10.143    | 526681  | 33.371  |
| 4     | 10.586    | 353018  | 22.368  |
| Total |           | 1578242 | 100.000 |



t = 1 h

Sample Name : t=1\_SOD\_790  
Sample ID :  
Data Filename : t=1\_SOD\_790.gcd  
Method Filename : Methode\_Achiral\_MUC\_Integration.gcm  
Batch Filename : batch.gcb  
Vial # : 64  
Injection Volume : 5 uL  
Date Acquired : 23.07.2019 18:33:02  
Date Processed : 23.07.2019 18:53:47

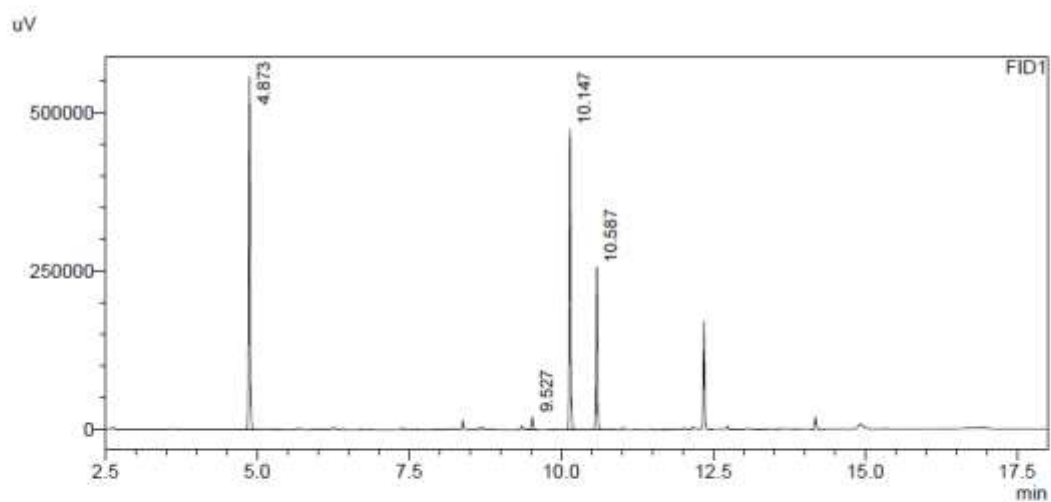

FID1

| Peak# | Ret. Time | Area    | Area%   |
|-------|-----------|---------|---------|
| 1     | 4.873     | 887170  | 43.704  |
| 2     | 9.527     | 35711   | 1.759   |
| 3     | 10.147    | 730207  | 35.971  |
| 4     | 10.587    | 376883  | 18.566  |
| Total |           | 2029972 | 100.000 |

t = 1.5 h

Sample Name : t=1,5\_SOD\_790  
Sample ID :  
Data Filename : t=1,5\_SOD\_790.gcd  
Method Filename : Methode\_Achiral\_MUC\_Integration.gcm  
Batch Filename : batch.gcb  
Vial # : 70  
Injection Volume : 5 uL  
Date Acquired : 23.07.2019 21:06:16  
Date Processed : 23.07.2019 21:27:00

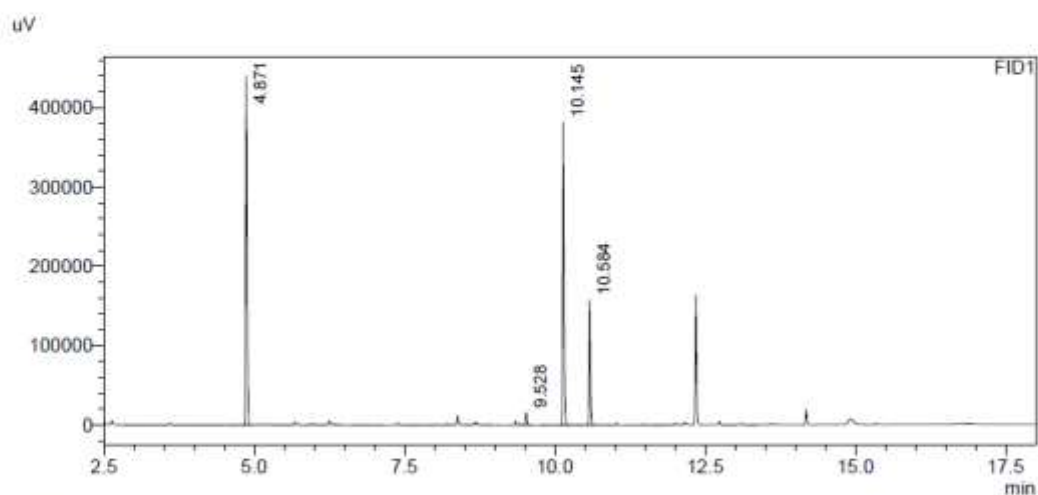

FID1

| Peak# | Ret. Time | Area    | Area%   |
|-------|-----------|---------|---------|
| 1     | 4.871     | 702335  | 45.604  |
| 2     | 9.528     | 28226   | 1.833   |
| 3     | 10.145    | 580947  | 37.722  |
| 4     | 10.584    | 228571  | 14.842  |
| Total |           | 1540079 | 100.000 |

t = 2 h

Sample Name : t=2\_SOD\_790  
Sample ID :  
Data Filename : t=2\_SOD\_790.gcd  
Method Filename : Methode\_Achiral\_MUC\_Integration.gcm  
Batch Filename : batch.gcb  
Vial # : 80  
Injection Volume : 5 uL  
Date Acquired : 24.07.2019 01:21:41  
Date Processed : 24.07.2019 01:42:24

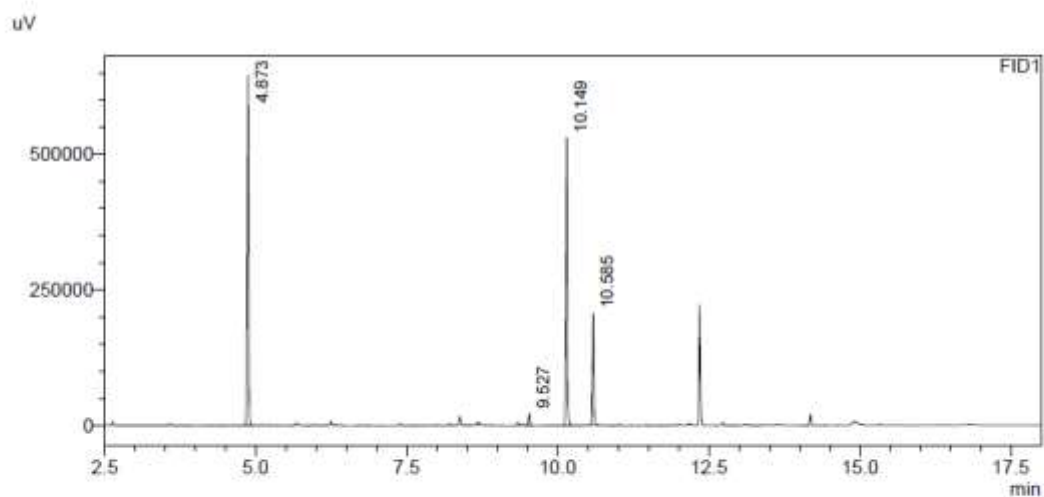

FID1

| Peak# | Ret. Time | Area    | Area%   |
|-------|-----------|---------|---------|
| 1     | 4.873     | 1024395 | 46.595  |
| 2     | 9.527     | 41623   | 1.893   |
| 3     | 10.149    | 835313  | 37.994  |
| 4     | 10.585    | 297187  | 13.518  |
| Total |           | 2198518 | 100.000 |

t = 2.5 h

Sample Name : t=2,5\_SOD\_790  
Sample ID :  
Data Filename : t=2,5\_SOD\_790.gcd  
Method Filename : Methode\_Achiral\_MUC\_Integration.gcm  
Batch Filename : batch.gcb  
Vial # : 86  
Injection Volume : 5 uL  
Date Acquired : 24.07.2019 03:54:28  
Date Processed : 24.07.2019 04:15:10

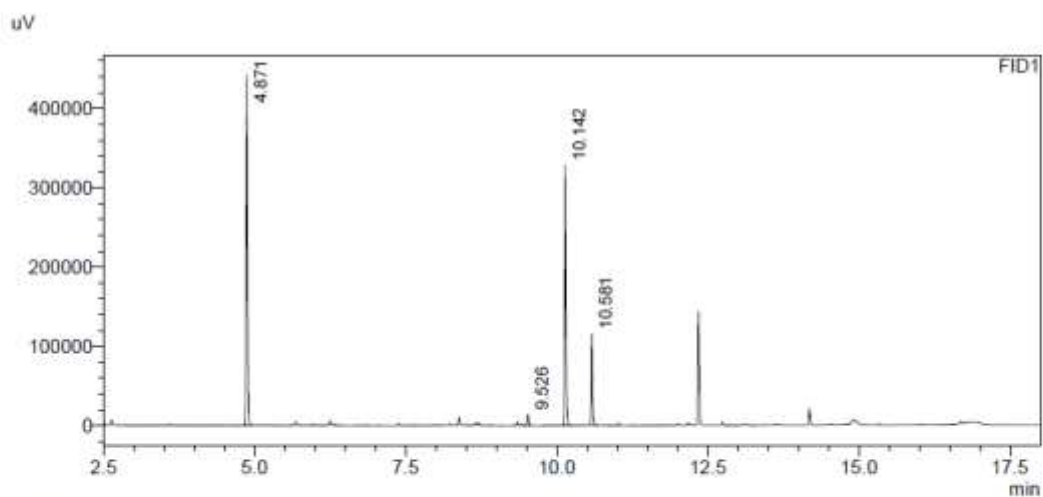

FID1

| Peak# | Ret. Time | Area    | Area%   |
|-------|-----------|---------|---------|
| 1     | 4.871     | 694668  | 50.606  |
| 2     | 9.526     | 26022   | 1.896   |
| 3     | 10.142    | 483252  | 35.205  |
| 4     | 10.581    | 168745  | 12.293  |
| Total |           | 1372687 | 100.000 |

t = 3 h

Sample Name : t=3\_SOD\_790  
Sample ID :  
Data Filename : t=3\_SOD\_790.gcd  
Method Filename : Methode\_Achiral\_MUC\_Integration.gcm  
Batch Filename : batch.gcb  
Vial # : 92  
Injection Volume : 5 uL  
Date Acquired : 24.07.2019 06:27:14  
Date Processed : 24.07.2019 06:47:57

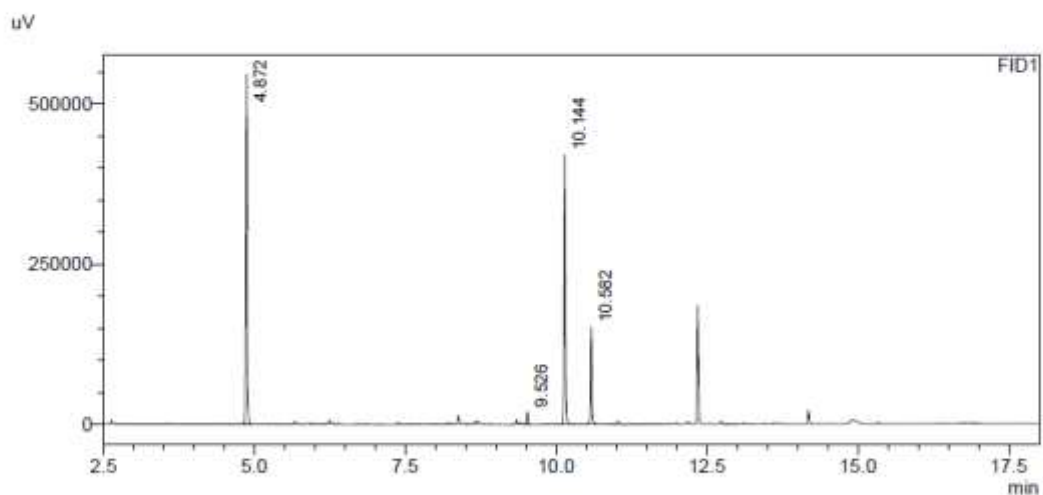

FID1

| Peak# | Ret. Time | Area    | Area%   |
|-------|-----------|---------|---------|
| 1     | 4.872     | 879747  | 49.517  |
| 2     | 9.526     | 35422   | 1.994   |
| 3     | 10.144    | 642339  | 36.154  |
| 4     | 10.582    | 219151  | 12.335  |
| Total |           | 1776660 | 100.000 |

t = 3.5 h

Sample Name : t=3,5\_SOD\_790  
Sample ID :  
Data Filename : t=3,5\_SOD\_790.gcd  
Method Filename : Methode\_Achiral\_MUC\_Integration.gcm  
Batch Filename : batch.gcb  
Vial # : 98  
Injection Volume : 5 uL  
Date Acquired : 24.07.2019 09:00:24  
Date Processed : 24.07.2019 09:21:06

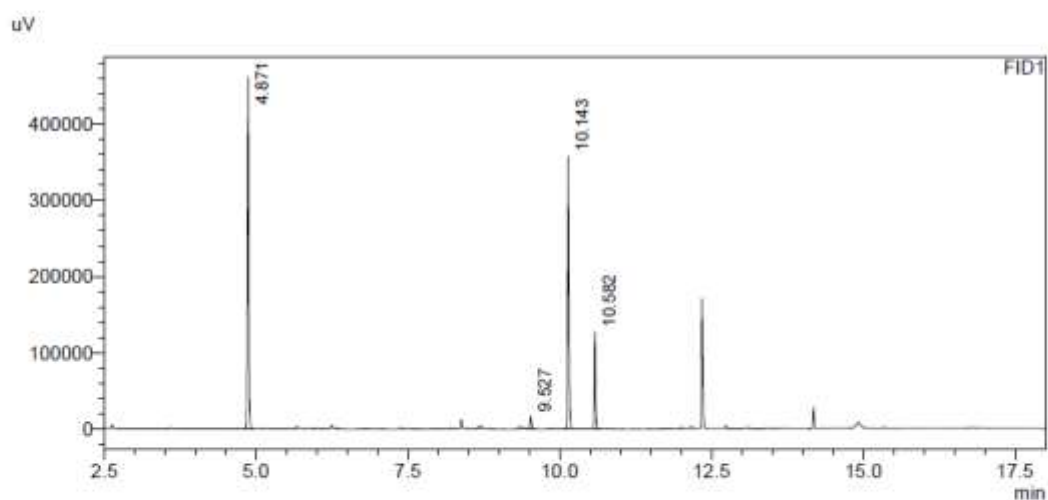

FID1

| Peak# | Ret. Time | Area    | Area%   |
|-------|-----------|---------|---------|
| 1     | 4.871     | 740750  | 49.793  |
| 2     | 9.527     | 30261   | 2.034   |
| 3     | 10.143    | 534378  | 35.921  |
| 4     | 10.582    | 182267  | 12.252  |
| Total |           | 1487656 | 100.000 |

t = 4 h

Sample Name : t=4\_SOD\_790  
Sample ID :  
Data Filename : t=4\_SOD\_790.gcd  
Method Filename : Methode\_Achiral\_MUC\_Integration.gcm  
Batch Filename : batch.gcb  
Vial # : 104  
Injection Volume : 5 uL  
Date Acquired : 24.07.2019 11:59:14  
Date Processed : 24.07.2019 12:19:58

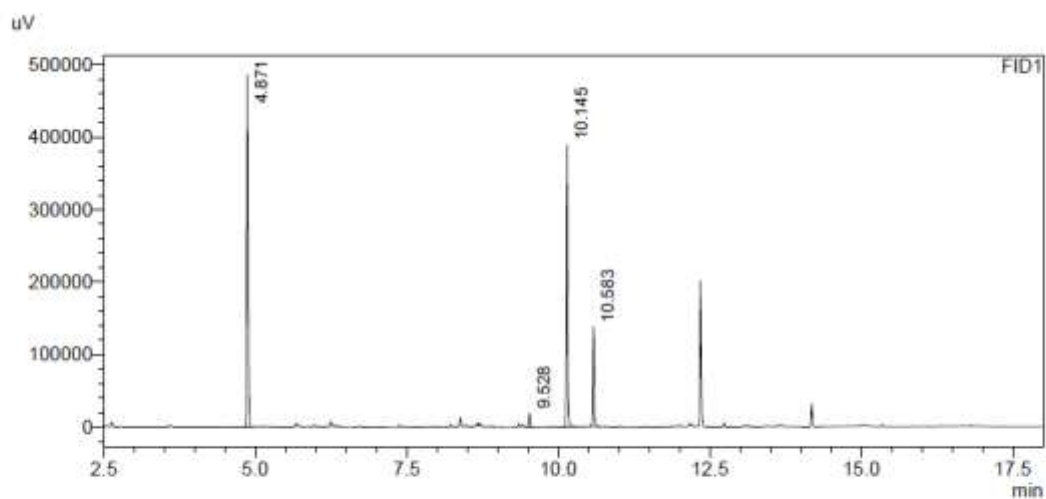

FID1

| Peak# | Ret. Time | Area    | Area%   |
|-------|-----------|---------|---------|
| 1     | 4.871     | 754752  | 48.379  |
| 2     | 9.528     | 33126   | 2.123   |
| 3     | 10.145    | 573903  | 36.787  |
| 4     | 10.583    | 198296  | 12.711  |
| Total |           | 1560077 | 100.000 |

t = 5 h

Sample Name : t=5\_SOD\_790  
Sample ID :  
Data Filename : t=5\_SOD\_790.gcd  
Method Filename : Methode\_Achiral\_MUC\_Integration.gcm  
Batch Filename : batch.gcb  
Vial # : 110  
Injection Volume : 5 uL  
Date Acquired : 24.07.2019 17:56:58  
Date Processed : 24.07.2019 18:17:42

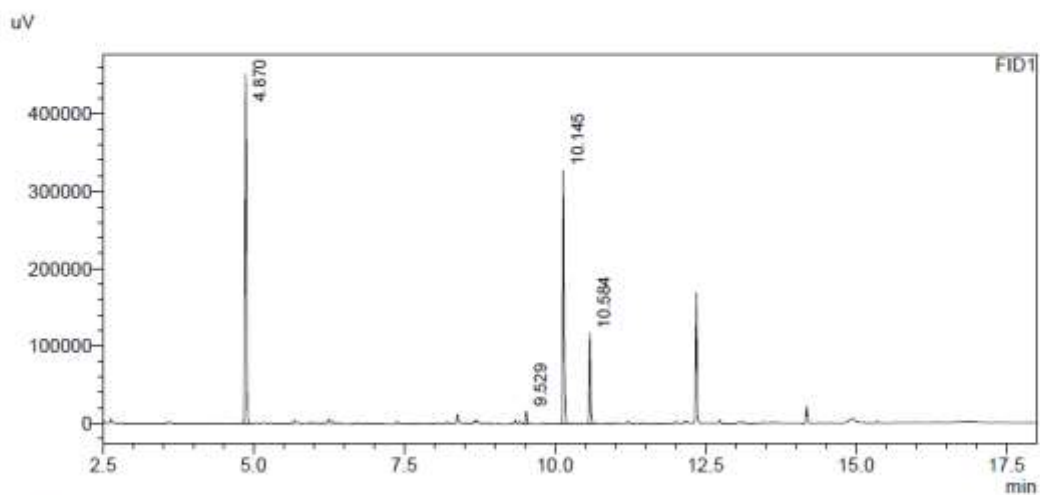

FID1

| Peak# | Ret. Time | Area    | Area%   |
|-------|-----------|---------|---------|
| 1     | 4.870     | 709985  | 50.511  |
| 2     | 9.529     | 28336   | 2.016   |
| 3     | 10.145    | 498371  | 35.456  |
| 4     | 10.584    | 168901  | 12.016  |
| Total |           | 1405593 | 100.000 |



t = 6 h

Sample Name : t=6\_SOD\_790  
Sample ID :  
Data Filename : t=6\_SOD\_790.gcd  
Method Filename : Methode\_Achiral\_MUC\_Integration.gcm  
Batch Filename : batch.gcb  
Vial # : 136  
Injection Volume : 5 uL  
Date Acquired : 25.07.2019 04:59:56  
Date Processed : 25.07.2019 05:20:40

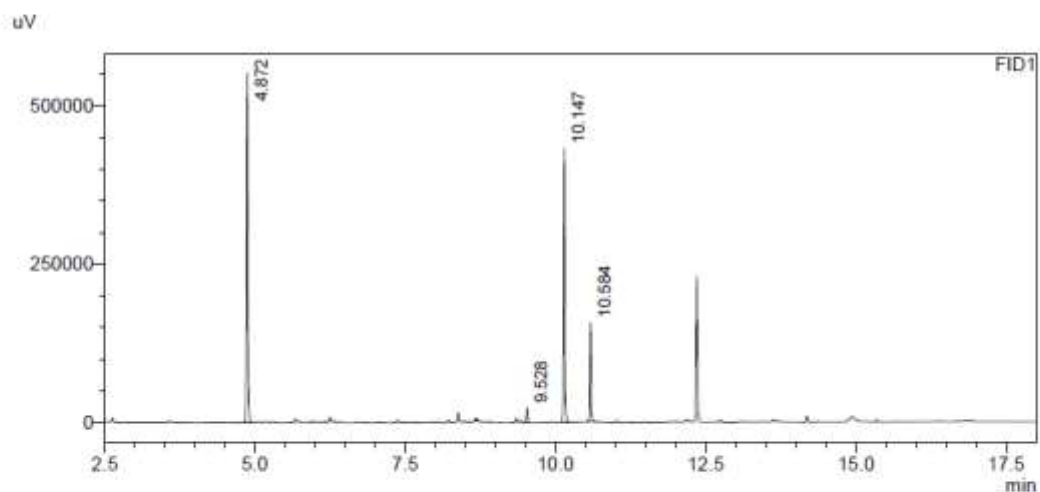

FID1

| Peak# | Ret. Time | Area    | Area%   |
|-------|-----------|---------|---------|
| 1     | 4.872     | 886378  | 48.890  |
| 2     | 9.528     | 38752   | 2.137   |
| 3     | 10.147    | 662186  | 36.524  |
| 4     | 10.584    | 225685  | 12.448  |
| Total |           | 1813001 | 100.000 |

t = 7 h

Sample Name : t=7\_SOD\_790  
Sample ID :  
Data Filename : t=7\_SOD\_790.gcd  
Method Filename : Methode\_Achiral\_MUC\_Integration.gcm  
Batch Filename : batch.gcb  
Vial # : 142  
Injection Volume : 5 uL  
Date Acquired : 25.07.2019 07:32:19  
Date Processed : 25.07.2019 07:53:02

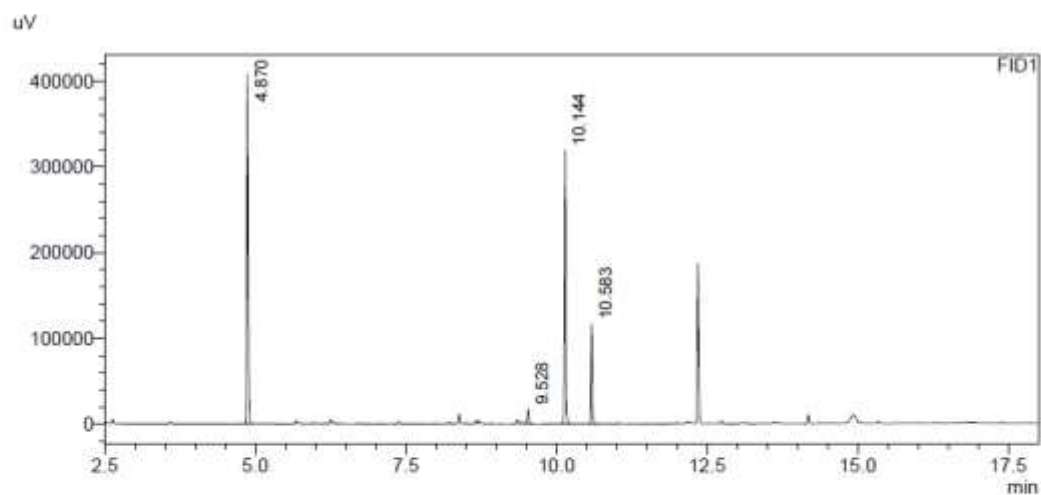

FID1

| Peak# | Ret. Time | Area    | Area%   |
|-------|-----------|---------|---------|
| 1     | 4.870     | 638854  | 48.521  |
| 2     | 9.528     | 29510   | 2.241   |
| 3     | 10.144    | 482129  | 36.618  |
| 4     | 10.583    | 166167  | 12.620  |
| Total |           | 1316659 | 100.000 |

t = 8 h

Sample Name : t=8\_SOD\_790  
Sample ID :  
Data Filename : t=8\_SOD\_790.gcd  
Method Filename : Methode\_Achiral\_MUC\_Integration.gcm  
Batch Filename : batch.gcb  
Vial # : 5  
Injection Volume : 5 uL  
Date Acquired : 25.07.2019 10:05:10  
Date Processed : 25.07.2019 10:25:53

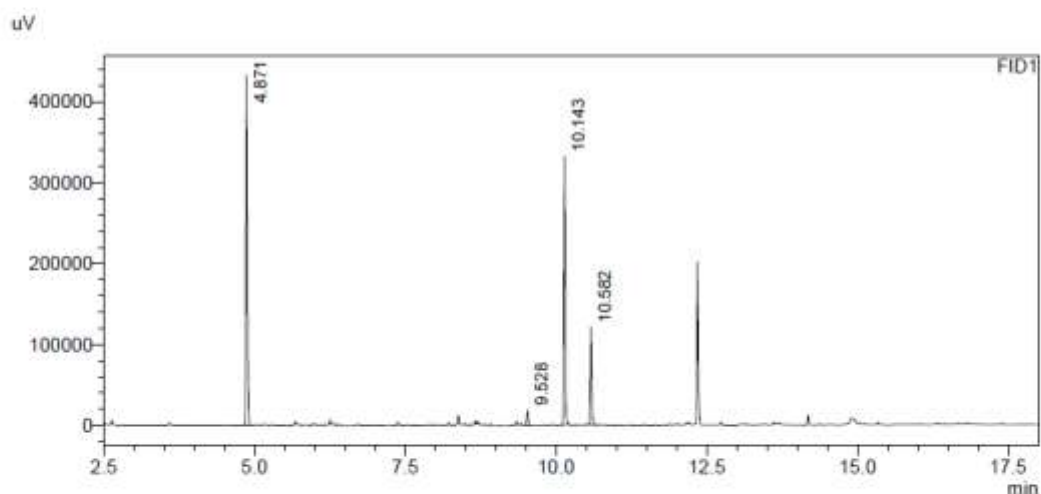

FID1

| Peak# | Ret. Time | Area    | Area%   |
|-------|-----------|---------|---------|
| 1     | 4.871     | 681738  | 49.061  |
| 2     | 9.528     | 31555   | 2.271   |
| 3     | 10.143    | 497653  | 35.813  |
| 4     | 10.582    | 178634  | 12.855  |
| Total |           | 1389579 | 100.000 |

t = 9 h

Sample Name : t=9\_SOD\_790  
Sample ID :  
Data Filename : t=9\_SOD\_790.gcd  
Method Filename : Methode\_Achiral\_MUC\_Integration.gcm  
Batch Filename : batch.gcb  
Vial # : 11  
Injection Volume : 5 uL  
Date Acquired : 25.07.2019 12:38:13  
Date Processed : 25.07.2019 12:58:56

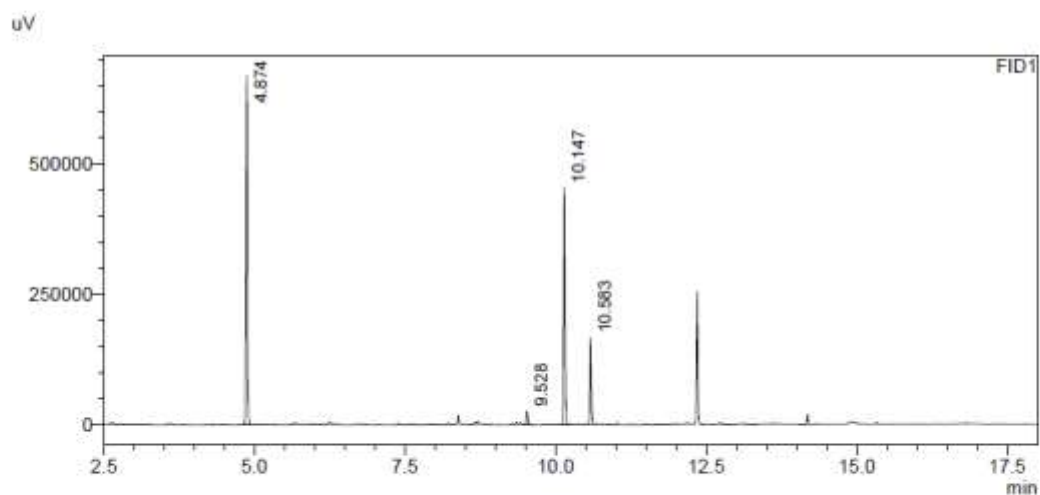

FID1

| Peak# | Ret. Time | Area    | Area%   |
|-------|-----------|---------|---------|
| 1     | 4.874     | 1048824 | 51.501  |
| 2     | 9.528     | 44774   | 2.199   |
| 3     | 10.147    | 701262  | 34.435  |
| 4     | 10.583    | 241642  | 11.866  |
| Total |           | 2036503 | 100.000 |

t = 10 h

Sample Name : t=10\_SOD\_790  
Sample ID :  
Data Filename : t=10\_SOD\_790.gcd  
Method Filename : Methode\_Achiral\_MUC\_Integration.gcm  
Batch Filename : batch.gcb  
Vial # : 17  
Injection Volume : 5 uL  
Date Acquired : 25.07.2019 17:18:49  
Date Processed : 25.07.2019 17:39:33

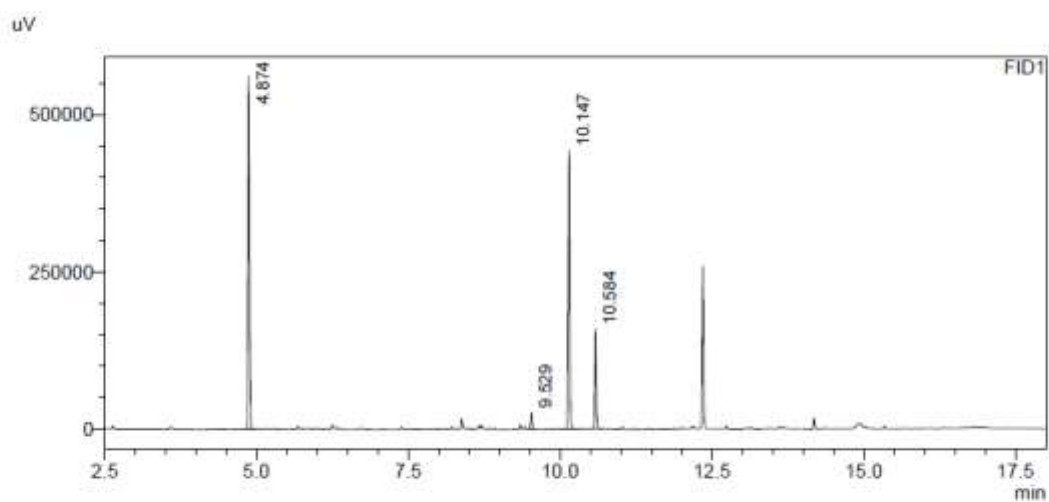

| Peak# | Ret. Time | Area    | Area%   |
|-------|-----------|---------|---------|
| 1     | 4.874     | 899903  | 48.442  |
| 2     | 9.529     | 44558   | 2.399   |
| 3     | 10.147    | 677088  | 36.448  |
| 4     | 10.584    | 236146  | 12.712  |
| Total |           | 1857695 | 100.000 |

t = 11 h

Sample Name : t=11\_SOD\_790  
Sample ID :  
Data Filename : t=11\_SOD\_790.gcd  
Method Filename : Methode\_Achiral\_MUC\_Integration.gcm  
Batch Filename : batch.gcb  
Vial # : 23  
Injection Volume : 5 uL  
Date Acquired : 25.07.2019 19:52:00  
Date Processed : 25.07.2019 20:12:43

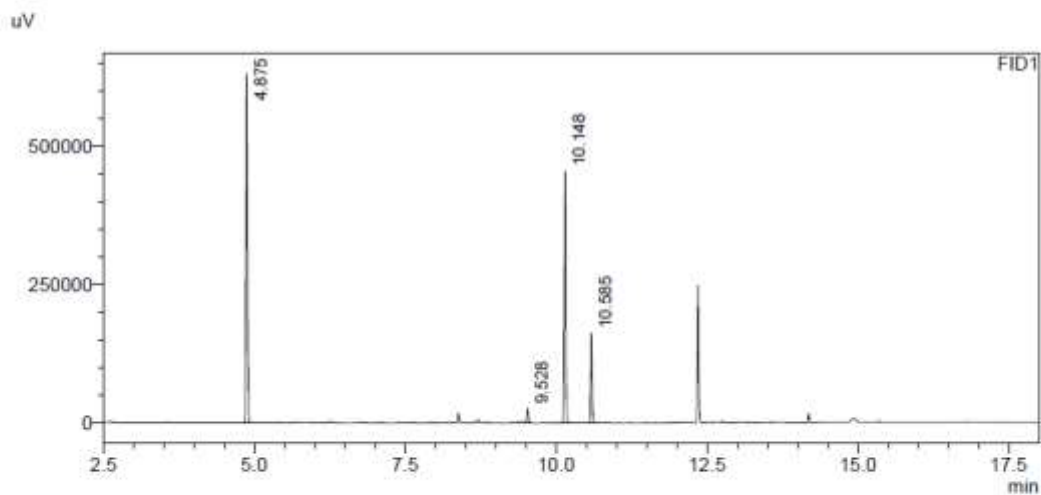

FID1

| Peak# | Ret. Time | Area    | Area%   |
|-------|-----------|---------|---------|
| 1     | 4.875     | 1023598 | 51.235  |
| 2     | 9.528     | 44616   | 2.233   |
| 3     | 10.148    | 695889  | 34.832  |
| 4     | 10.585    | 233764  | 11.701  |
| Total |           | 1997866 | 100.000 |

t = 24 h

Sample Name : t=24\_SOD\_790  
Sample ID :  
Data Filename : t=24\_SOD\_790.gcd  
Method Filename : Methode\_Achiral\_MUC\_Integration.gcm  
Batch Filename : batch.gcb  
Vial # : 29  
Injection Volume : 5 uL  
Date Acquired : 25.07.2019 22:25:07  
Date Processed : 25.07.2019 22:45:50

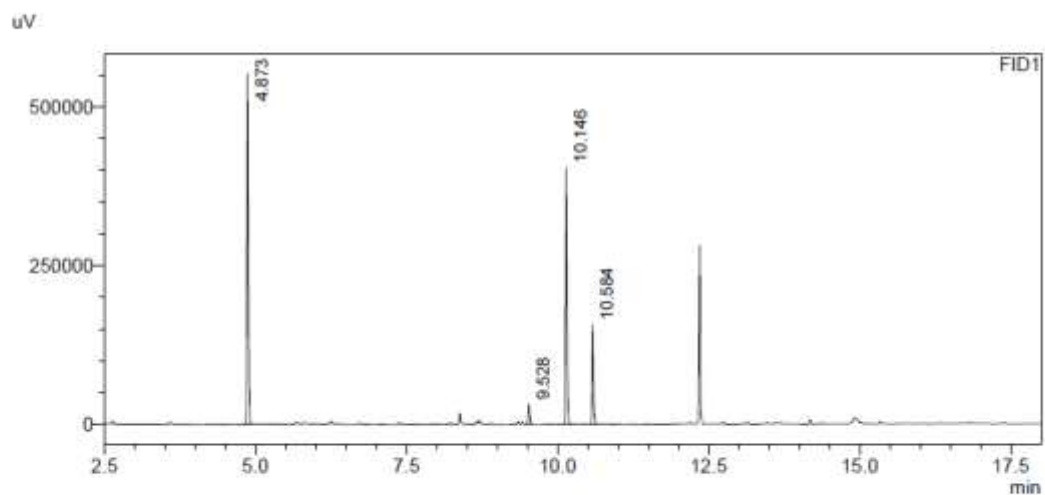

FID1

| Peak# | Ret. Time | Area    | Area%   |
|-------|-----------|---------|---------|
| 1     | 4.873     | 878355  | 49.548  |
| 2     | 9.528     | 50254   | 2.835   |
| 3     | 10.146    | 617787  | 34.849  |
| 4     | 10.584    | 226356  | 12.769  |
| Total |           | 1772751 | 100.000 |

t = 48 h

Sample Name : t=48\_SOD\_790  
Sample ID :  
Data Filename : t=48\_SOD\_790.gcd  
Method Filename : Methode\_Achiral\_MUC\_Integration.gcm  
Batch Filename : batch.gcb  
Vial # : 35  
Injection Volume : 5 uL  
Date Acquired : 26.07.2019 01:23:43  
Date Processed : 26.07.2019 01:44:26

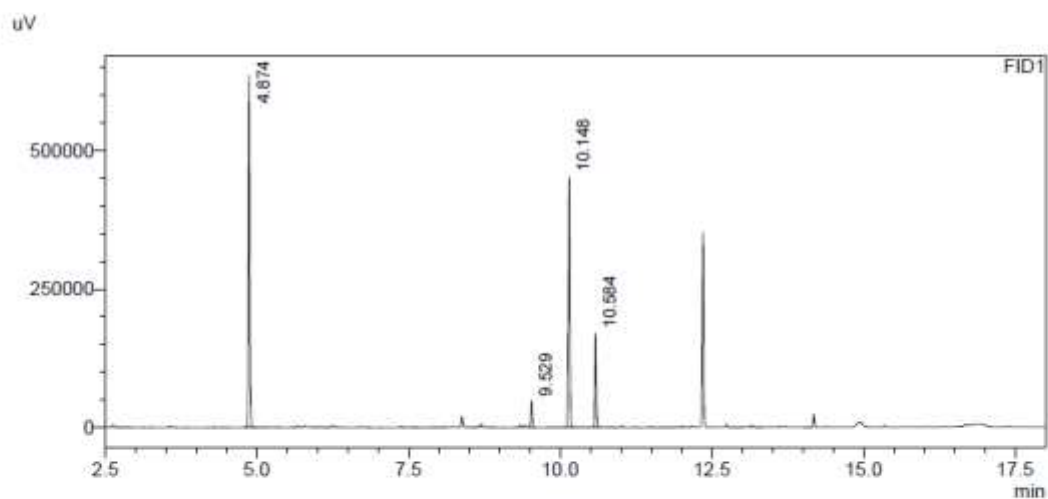

| Peak# | Ret. Time | Area    | Area%   |
|-------|-----------|---------|---------|
| 1     | 4.874     | 1019661 | 50.289  |
| 2     | 9.529     | 74440   | 3.671   |
| 3     | 10.148    | 686832  | 33.874  |
| 4     | 10.584    | 246654  | 12.165  |
| Total |           | 2027587 | 100.000 |



t = 72 h

Sample Name : t=72\_SOD\_790  
Sample ID :  
Data Filename : t=72\_SOD\_790.gcd  
Method Filename : Methode\_Achiral\_MUC\_Integration.gcm  
Batch Filename : batch.gcb  
Vial # : 41  
Injection Volume : 5 uL  
Date Acquired : 26.07.2019 03:56:40  
Date Processed : 26.07.2019 04:17:24

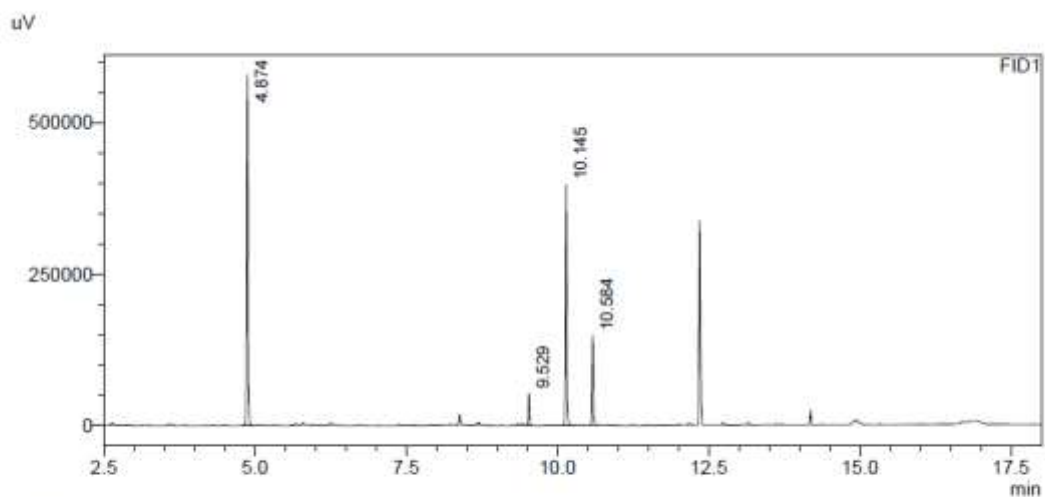

| Peak# | Ret. Time | Area    | Area%   |
|-------|-----------|---------|---------|
| 1     | 4.874     | 926018  | 50.959  |
| 2     | 9.529     | 81313   | 4.475   |
| 3     | 10.145    | 595346  | 32.762  |
| 4     | 10.584    | 214495  | 11.804  |
| Total |           | 1817171 | 100.000 |

No I, no iPrOH

t = 0 min

Sample Name : t=0\_SOD\_791  
Sample ID :  
Data Filename : t=0\_SOD\_791.gcd  
Method Filename : Methode\_Achiral\_MUC\_Integration.gcm  
Batch Filename : batch.gcb  
Vial # : 41  
Injection Volume : 5 uL  
Date Acquired : 23.07.2019 06:39:32  
Date Processed : 23.07.2019 07:00:14

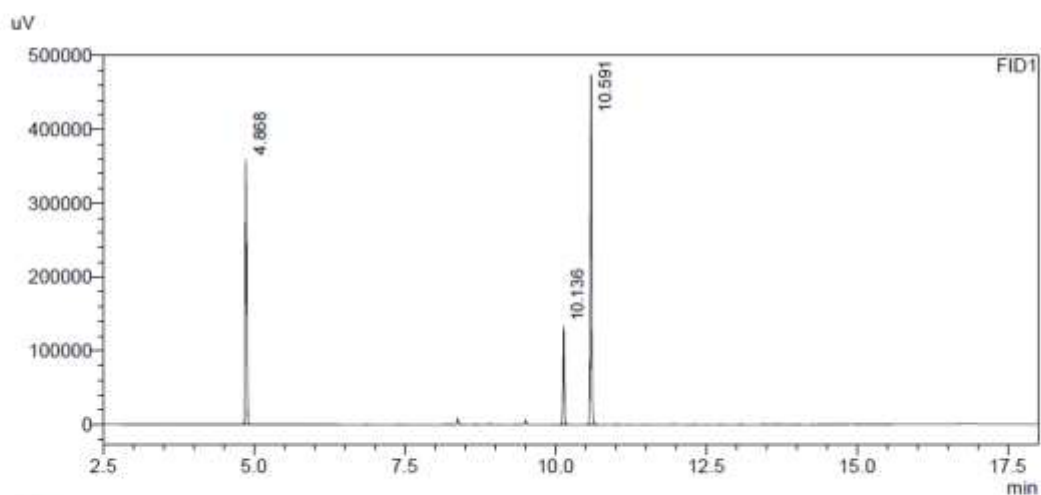

FID1

| Peak# | Ret. Time | Area    | Area%   |
|-------|-----------|---------|---------|
| 1     | 4.868     | 558581  | 37.621  |
| 2     | 10.136    | 193584  | 13.038  |
| 3     | 10.591    | 732592  | 49.341  |
| Total |           | 1484758 | 100.000 |

t = 15 min

Sample Name : t=0,25\_SOD\_791  
Sample ID :  
Data Filename : t=0,25\_SOD\_791.gcd  
Method Filename : Methode\_Achiral\_MUC\_Integration.gcm  
Batch Filename : batch.gcb  
Vial # : 47  
Injection Volume : 5 uL  
Date Acquired : 23.07.2019 09:12:20  
Date Processed : 23.07.2019 09:33:03

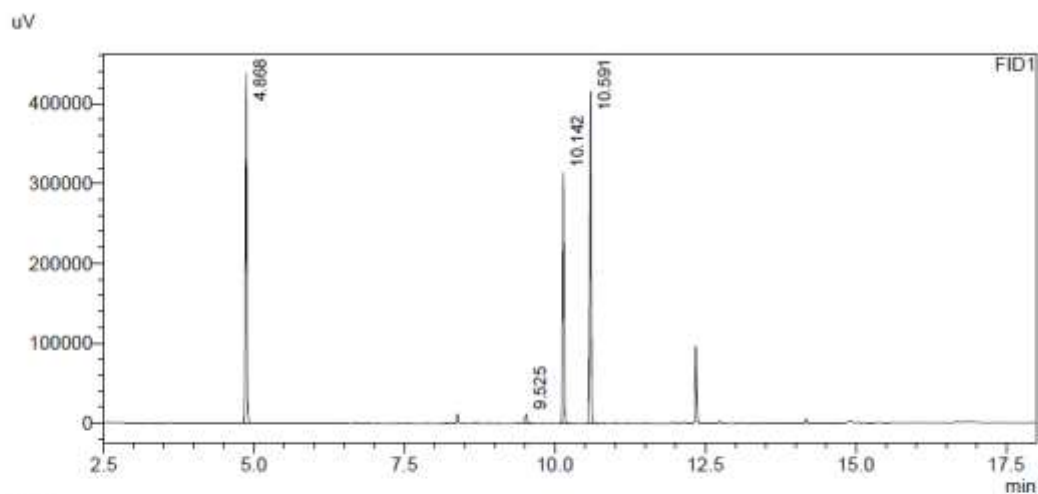

| Peak# | Ret. Time | Area    | Area%   |
|-------|-----------|---------|---------|
| 1     | 4.868     | 696453  | 38.306  |
| 2     | 9.525     | 23274   | 1.280   |
| 3     | 10.142    | 474241  | 26.084  |
| 4     | 10.591    | 624149  | 34.329  |
| Total |           | 1818116 | 100.000 |

t = 30 min

Sample Name : t=0,5\_SOD\_791  
Sample ID :  
Data Filename : t=0,5\_SOD\_791.gcd  
Method Filename : Methode\_Achiral\_MUC\_Integration.gcm  
Batch Filename : batch.gcb  
Vial # : 53  
Injection Volume : 5 uL  
Date Acquired : 23.07.2019 11:45:16  
Date Processed : 23.07.2019 12:06:00

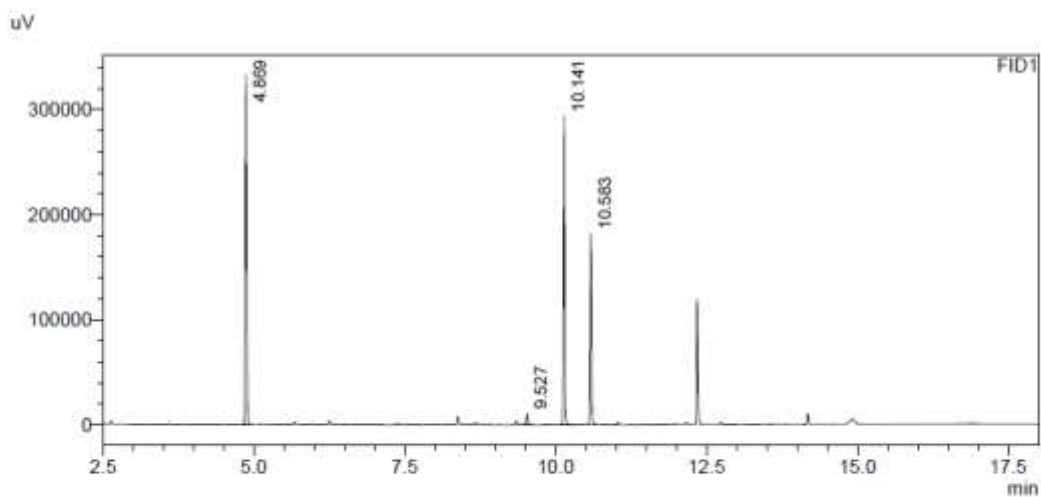

| Peak# | Ret. Time | Area    | Area%   |
|-------|-----------|---------|---------|
| 1     | 4.869     | 531698  | 42.747  |
| 2     | 9.527     | 20091   | 1.615   |
| 3     | 10.141    | 426331  | 34.276  |
| 4     | 10.583    | 265702  | 21.362  |
| Total |           | 1243822 | 100.000 |

t = 45 min

Sample Name : t=0,75\_SOD\_791  
Sample ID :  
Data Filename : t=0,75\_SOD\_791.gcd  
Method Filename : Methode\_Achiral\_MUC\_Integration.gcm  
Batch Filename : batch.gcb  
Vial # : 59  
Injection Volume : 5 uL  
Date Acquired : 23.07.2019 16:25:26  
Date Processed : 23.07.2019 16:46:10

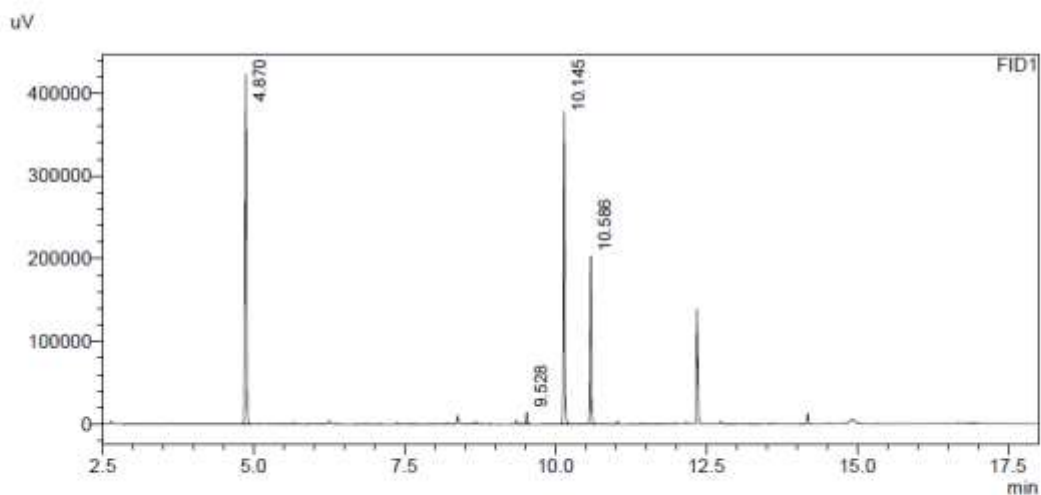

FID1

| Peak# | Ret. Time | Area    | Area%   |
|-------|-----------|---------|---------|
| 1     | 4.870     | 675132  | 43.442  |
| 2     | 9.528     | 26588   | 1.711   |
| 3     | 10.145    | 560159  | 36.044  |
| 4     | 10.586    | 292214  | 18.803  |
| Total |           | 1554093 | 100.000 |

t = 1 h

Sample Name : t=1\_SOD\_791  
Sample ID :  
Data Filename : t=1\_SOD\_791.gcd  
Method Filename : Methode\_Achiral\_MUC\_Integration.gcm  
Batch Filename : batch.gcb  
Vial # : 65  
Injection Volume : 5 uL  
Date Acquired : 23.07.2019 18:58:35  
Date Processed : 23.07.2019 19:19:19

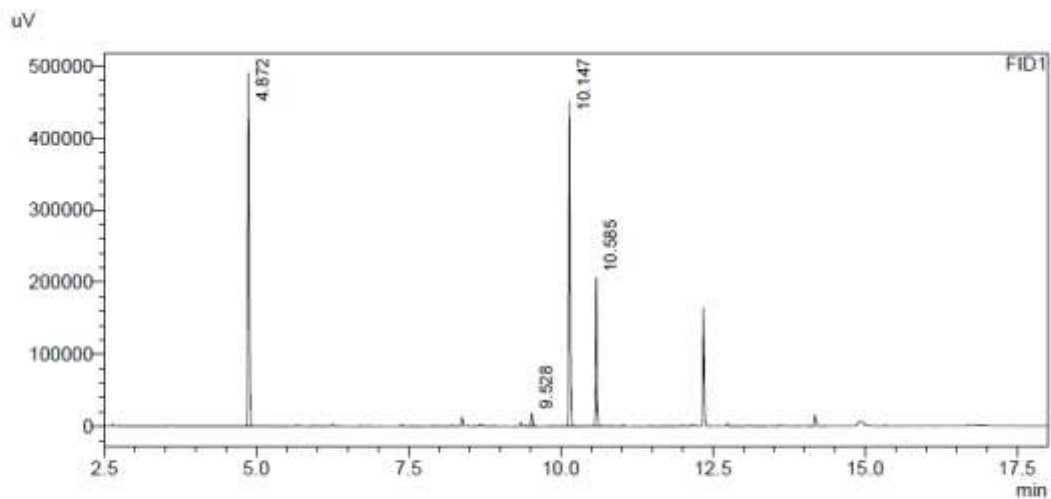

FID1

| Peak# | Ret. Time | Area    | Area%   |
|-------|-----------|---------|---------|
| 1     | 4.872     | 785356  | 43.525  |
| 2     | 9.528     | 33200   | 1.840   |
| 3     | 10.147    | 689526  | 38.214  |
| 4     | 10.585    | 296282  | 16.420  |
| Total |           | 1804364 | 100.000 |

t = 1.5 h

Sample Name : t=1,5\_SOD\_791  
Sample ID :  
Data Filename : t=1,5\_SOD\_791.gcd  
Method Filename : Methode\_Achiral\_MUC\_Integration.gcm  
Batch Filename : batch.gcb  
Vial # : 71  
Injection Volume : 5 uL  
Date Acquired : 23.07.2019 21:31:52  
Date Processed : 23.07.2019 21:52:35

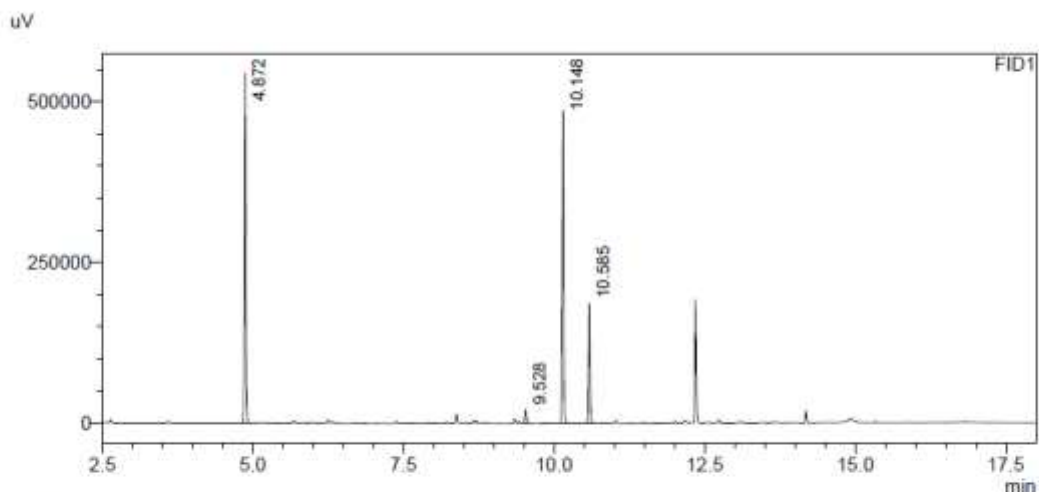

FID1

| Peak# | Ret. Time | Area    | Area%   |
|-------|-----------|---------|---------|
| 1     | 4.872     | 857396  | 45.069  |
| 2     | 9.528     | 36763   | 1.932   |
| 3     | 10.148    | 740534  | 38.926  |
| 4     | 10.585    | 267721  | 14.073  |
| Total |           | 1902413 | 100.000 |

t = 2 h

Sample Name : t-2\_SOD\_791  
Sample ID :  
Data Filename : t-2\_SOD\_791.gcd  
Method Filename : Methode\_Achiral\_MUC\_Integration.gcm  
Batch Filename : batch.gcb  
Vial # : 81  
Injection Volume : 5 uL  
Date Acquired : 24.07.2019 01:47:10  
Date Processed : 24.07.2019 02:07:54

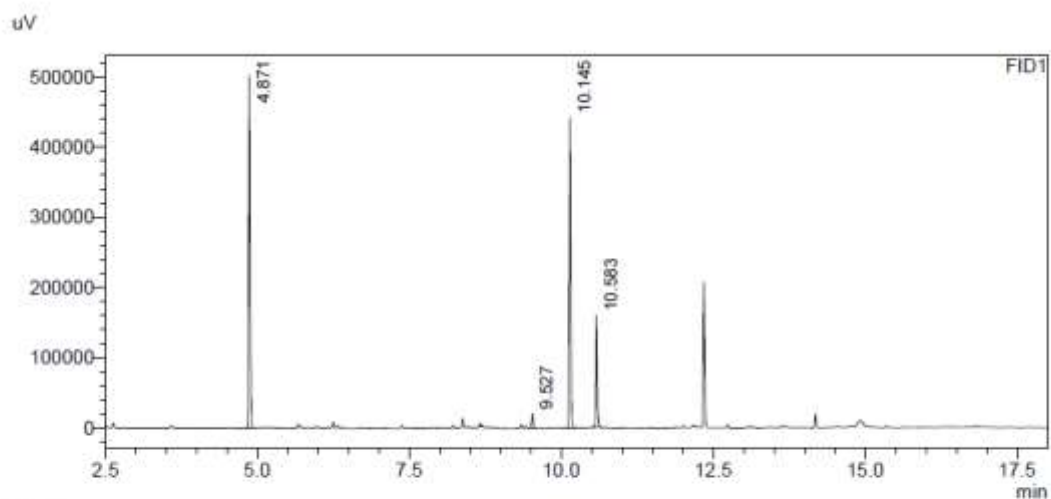

| Peak# | Ret. Time | Area    | Area%   |
|-------|-----------|---------|---------|
| 1     | 4.871     | 793775  | 45.897  |
| 2     | 9.527     | 35210   | 2.036   |
| 3     | 10.145    | 671944  | 38.853  |
| 4     | 10.583    | 228540  | 13.214  |
| Total |           | 1729468 | 100.000 |



t = 2.5 h

Sample Name : t=2,5\_SOD\_791  
Sample ID :  
Data Filename : t=2,5\_SOD\_791.gcd  
Method Filename : Methode\_Achiral\_MUC\_Integration.gcm  
Batch Filename : batch.gcb  
Vial # : 87  
Injection Volume : 5 uL  
Date Acquired : 24.07.2019 04:19:56  
Date Processed : 24.07.2019 04:40:40

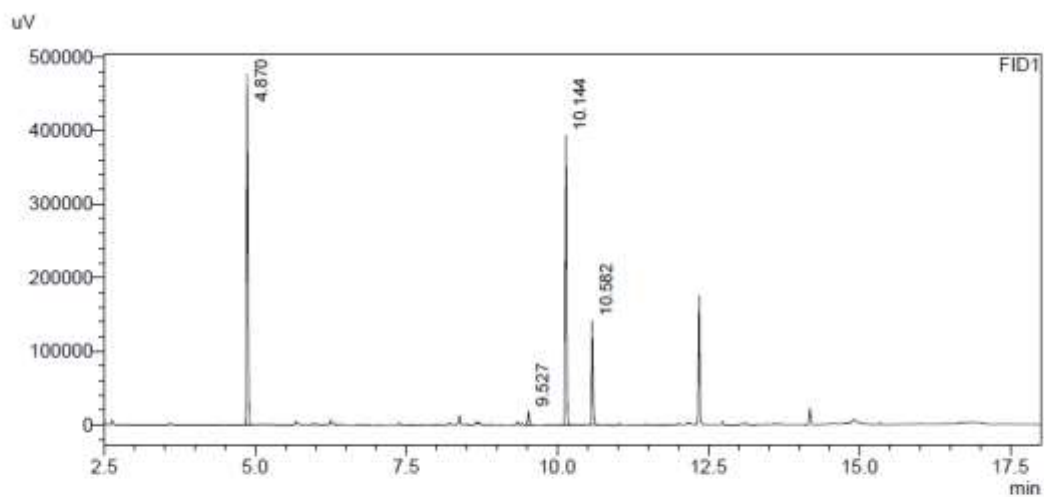

FID1

| Peak# | Ret. Time | Area    | Area%   |
|-------|-----------|---------|---------|
| 1     | 4.870     | 756808  | 47.145  |
| 2     | 9.527     | 33344   | 2.077   |
| 3     | 10.144    | 608058  | 37.879  |
| 4     | 10.582    | 207074  | 12.900  |
| Total |           | 1605284 | 100.000 |

t = 3 h

Sample Name : t=3\_SOD\_791  
Sample ID :  
Data Filename : t=3\_SOD\_791.gcd  
Method Filename : Methode\_Achiral\_MUC\_Integration.gcm  
Batch Filename : batch.gcb  
Vial # : 93  
Injection Volume : 5 uL  
Date Acquired : 24.07.2019 06:52:45  
Date Processed : 24.07.2019 07:13:28

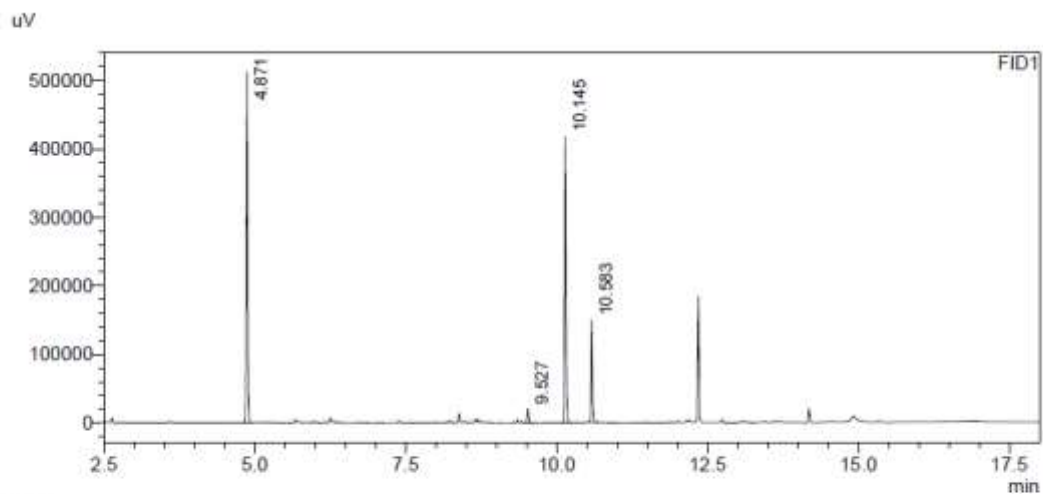

| Peak# | Ret. Time | Area    | Area%   |
|-------|-----------|---------|---------|
| 1     | 4.871     | 804591  | 47.399  |
| 2     | 9.527     | 35845   | 2.112   |
| 3     | 10.145    | 638934  | 37.640  |
| 4     | 10.583    | 218107  | 12.849  |
| Total |           | 1697477 | 100.000 |

t = 3.5 h

Sample Name : t=4\_SOD\_791  
Sample ID :  
Data Filename : t=4\_SOD\_791.gcd  
Method Filename : Methode\_Achiral\_MUC\_Integration.gcm  
Batch Filename : batch.gcb  
Vial # : 105  
Injection Volume : 5 uL  
Date Acquired : 24.07.2019 12:24:48  
Date Processed : 24.07.2019 12:45:32

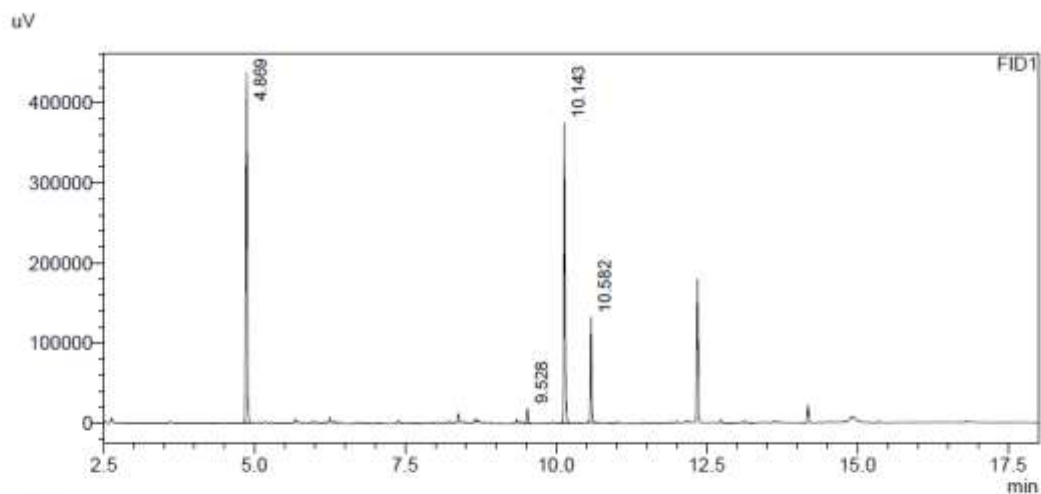

| Peak# | Ret. Time | Area    | Area%   |
|-------|-----------|---------|---------|
| 1     | 4.869     | 699421  | 47.091  |
| 2     | 9.528     | 32690   | 2.201   |
| 3     | 10.143    | 561305  | 37.792  |
| 4     | 10.582    | 191828  | 12.916  |
| Total |           | 1485245 | 100.000 |

t = 4 h

Sample Name : t=4\_SOD\_791  
Sample ID :  
Data Filename : t=4\_SOD\_791.gcd  
Method Filename : Methode\_Achiral\_MUC\_Integration.gcm  
Batch Filename : batch.gcb  
Vial # : 105  
Injection Volume : 5 uL  
Date Acquired : 24.07.2019 12:24:48  
Date Processed : 24.07.2019 12:45:32



FID1

| Peak# | Ret. Time | Area    | Area%   |
|-------|-----------|---------|---------|
| 1     | 4.869     | 699421  | 47.091  |
| 2     | 9.528     | 32690   | 2.201   |
| 3     | 10.143    | 561305  | 37.792  |
| 4     | 10.582    | 191828  | 12.916  |
| Total |           | 1485245 | 100.000 |

t = 5 h

Sample Name : t=5\_SOD\_791  
Sample ID :  
Data Filename : t=5\_SOD\_791.gcd  
Method Filename : Methode\_Achiral\_MUC\_Integration.gcm  
Batch Filename : batch.gcb  
Vial # : 111  
Injection Volume : 5 uL  
Date Acquired : 24.07.2019 18:22:33  
Date Processed : 24.07.2019 18:43:14

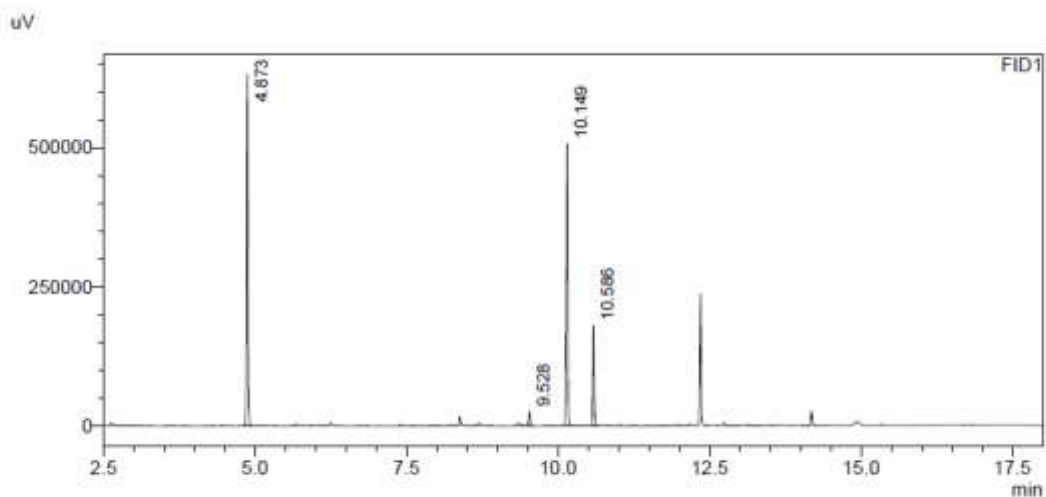

FID1

| Peak# | Ret. Time | Area    | Area%   |
|-------|-----------|---------|---------|
| 1     | 4.873     | 996515  | 47.768  |
| 2     | 9.528     | 45568   | 2.184   |
| 3     | 10.149    | 782712  | 37.519  |
| 4     | 10.586    | 261366  | 12.529  |
| Total |           | 2086161 | 100.000 |

t = 6 h

Sample Name : t=6\_SOD\_791  
Sample ID :  
Data Filename : t=6\_SOD\_791.gcd  
Method Filename : Methode\_Achiral\_MUC\_Integration.gcm  
Batch Filename : batch.gcb  
Vial # : 137  
Injection Volume : 5 uL  
Date Acquired : 25.07.2019 05:25:20  
Date Processed : 25.07.2019 05:46:04

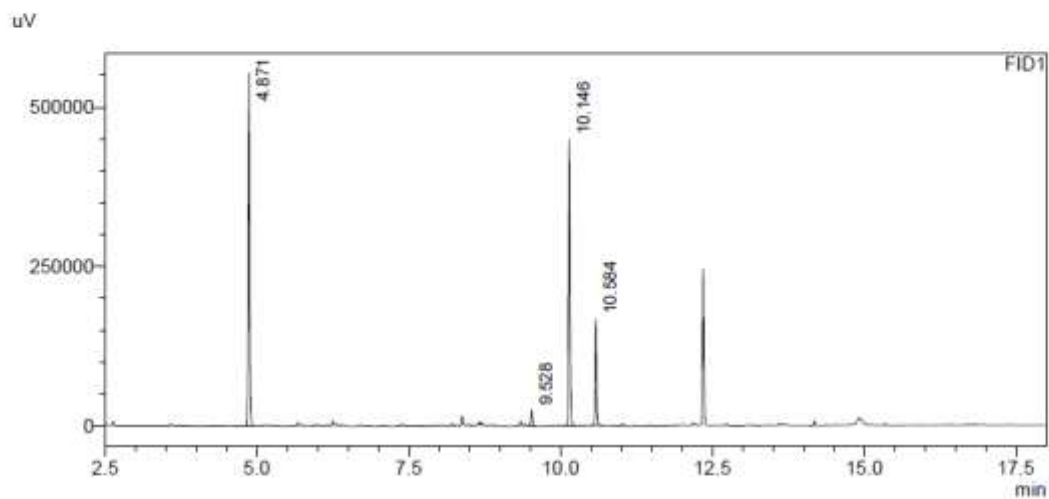

FID1

| Peak# | Ret. Time | Area    | Area%   |
|-------|-----------|---------|---------|
| 1     | 4.871     | 875933  | 47.066  |
| 2     | 9.528     | 42257   | 2.271   |
| 3     | 10.146    | 698654  | 37.541  |
| 4     | 10.584    | 244221  | 13.123  |
| Total |           | 1861065 | 100.000 |

t = 7 h

Sample Name : t=7\_SOD\_791  
Sample ID :  
Data Filename : t=7\_SOD\_791.gcd  
Method Filename : Methode\_Achiral\_MUC\_Integration.gcm  
Batch Filename : batch.gcb  
Vial # : 143  
Injection Volume : 5 uL  
Date Acquired : 25.07.2019 07:57:47  
Date Processed : 25.07.2019 08:18:29

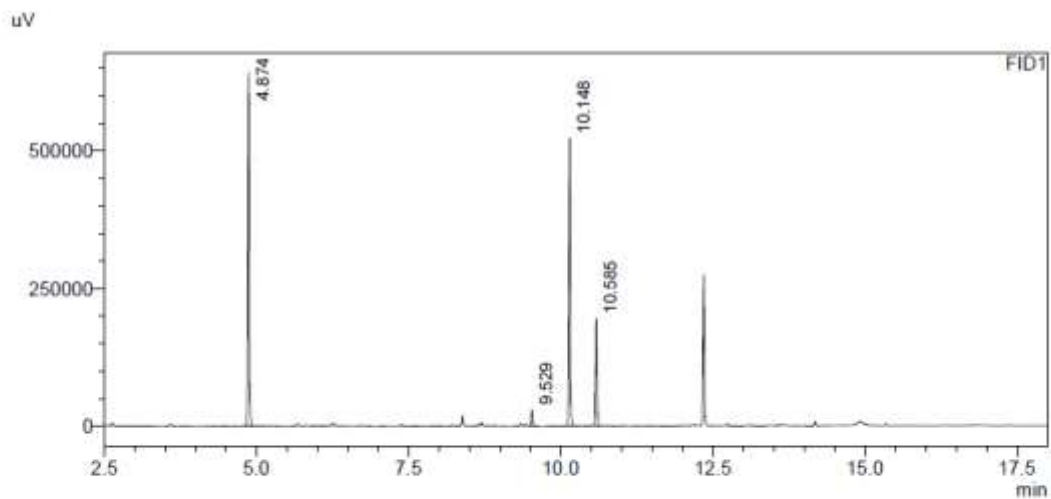

FID1

| Peak# | Ret. Time | Area    | Area%   |
|-------|-----------|---------|---------|
| 1     | 4.874     | 1051954 | 47.823  |
| 2     | 9.529     | 49712   | 2.260   |
| 3     | 10.148    | 816383  | 37.114  |
| 4     | 10.585    | 281636  | 12.803  |
| Total |           | 2199685 | 100.000 |

t = 8 h

Sample Name : t=8\_SOD\_791  
Sample ID :  
Data Filename : t=8\_SOD\_791.gcd  
Method Filename : Methode\_Achiral\_MUC\_Integration.gcm  
Batch Filename : batch.gcb  
Vial # : 6  
Injection Volume : 5 uL  
Date Acquired : 25.07.2019 10:30:41  
Date Processed : 25.07.2019 10:51:25

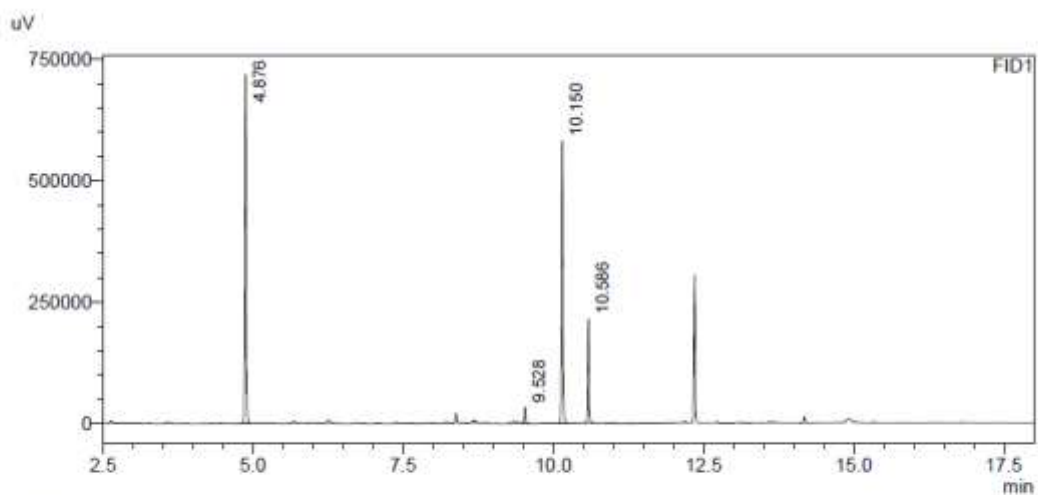

FID1

| Peak# | Ret. Time | Area    | Area%   |
|-------|-----------|---------|---------|
| 1     | 4.876     | 1173772 | 47.502  |
| 2     | 9.528     | 57382   | 2.322   |
| 3     | 10.150    | 928193  | 37.564  |
| 4     | 10.586    | 311623  | 12.611  |
| Total |           | 2470971 | 100.000 |



t = 9 h

Sample Name : t=9\_SOD\_791  
Sample ID :  
Data Filename : t=9\_SOD\_791.gcd  
Method Filename : Methode\_Achiral\_MUC\_Integration.gcm  
Batch Filename : batch.gcb  
Vial # : 12  
Injection Volume : 5 uL  
Date Acquired : 25.07.2019 13:03:42  
Date Processed : 25.07.2019 13:24:28

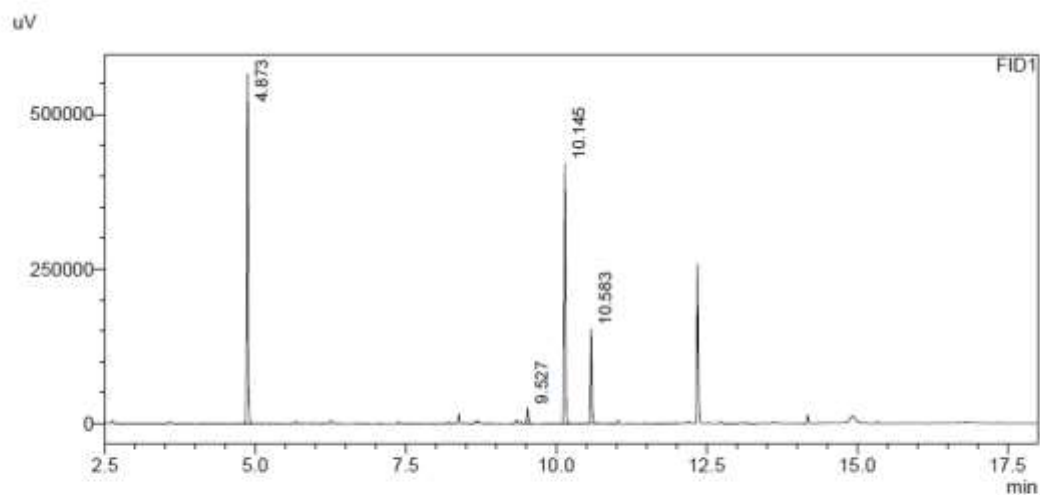

FID1

| Peak# | Ret. Time | Area    | Area%   |
|-------|-----------|---------|---------|
| 1     | 4.873     | 883871  | 49.405  |
| 2     | 9.527     | 41531   | 2.321   |
| 3     | 10.145    | 641449  | 35.855  |
| 4     | 10.583    | 222169  | 12.418  |
| Total |           | 1789020 | 100.000 |

t = 10 h

Sample Name : t=10\_SOD\_791  
Sample ID :  
Data Filename : t=10\_SOD\_791.gcd  
Method Filename : Methode\_Achiral\_MUC\_Integration.gcm  
Batch Filename : batch.gcb  
Vial # : 18  
Injection Volume : 5 uL  
Date Acquired : 25.07.2019 17:44:23  
Date Processed : 25.07.2019 18:05:07

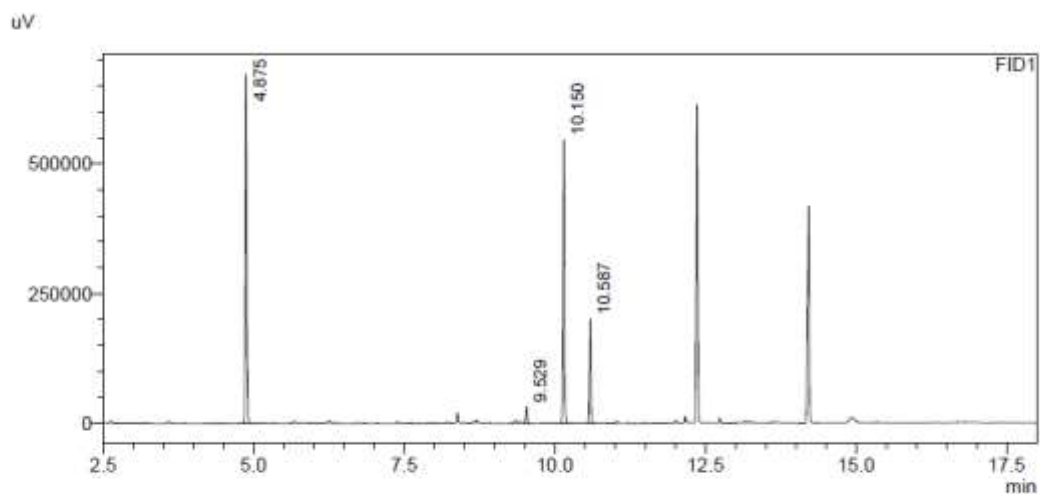

| Peak# | Ret. Time | Area    | Area%   |
|-------|-----------|---------|---------|
| 1     | 4.875     | 1080273 | 47.334  |
| 2     | 9.529     | 53406   | 2.340   |
| 3     | 10.150    | 859008  | 37.639  |
| 4     | 10.587    | 289541  | 12.687  |
| Total |           | 2282228 | 100.000 |

t = 11 h

Sample Name : t=11\_SOD\_791  
Sample ID :  
Data Filename : t=11\_SOD\_791.gcd  
Method Filename : Methode\_Achiral\_MUC\_Integration.gcm  
Batch Filename : batch.gcb  
Vial # : 24  
Injection Volume : 5 uL  
Date Acquired : 25.07.2019 20:17:29  
Date Processed : 25.07.2019 20:38:13

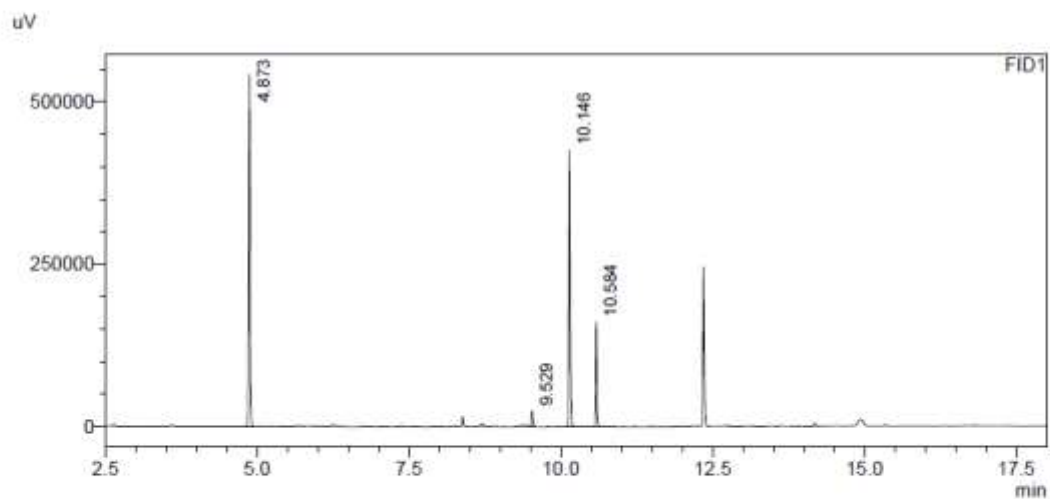

FID1

| Peak# | Ret. Time | Area    | Area%   |
|-------|-----------|---------|---------|
| 1     | 4.873     | 862228  | 49.095  |
| 2     | 9.529     | 40197   | 2.289   |
| 3     | 10.146    | 626408  | 35.667  |
| 4     | 10.584    | 227410  | 12.949  |
| Total |           | 1756244 | 100.000 |

t = 24 h

Sample Name : t=24\_SOD\_791  
Sample ID :  
Data Filename : t=24\_SOD\_791.gcd  
Method Filename : Methode\_Achiral\_MUC\_Integration.gcm  
Batch Filename : batch.gcb  
Vial # : 30  
Injection Volume : 5 uL  
Date Acquired : 25.07.2019 23:16:07  
Date Processed : 25.07.2019 23:36:54

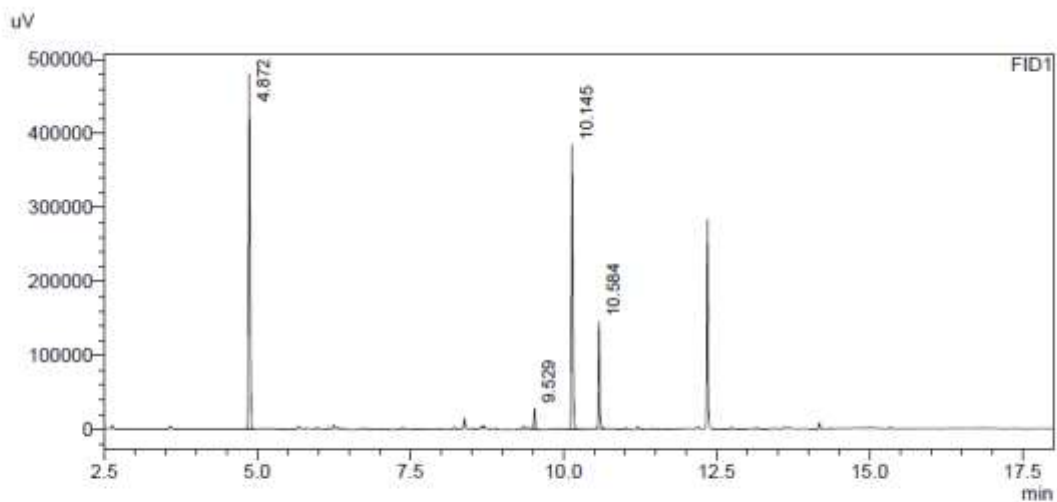

| Peak# | Ret. Time | Area    | Area%   |
|-------|-----------|---------|---------|
| 1     | 4.872     | 767633  | 48.042  |
| 2     | 9.529     | 45542   | 2.850   |
| 3     | 10.145    | 578912  | 36.231  |
| 4     | 10.584    | 205758  | 12.877  |
| Total |           | 1597845 | 100.000 |

t = 48 h

Sample Name : t=48\_SOD\_791  
Sample ID :  
Data Filename : t=48\_SOD\_791.gcd  
Method Filename : Methode\_Achiral\_MUC\_Integration.gcm  
Batch Filename : batch.gcb  
Vial # : 36  
Injection Volume : 5 uL  
Date Acquired : 26.07.2019 01:49:12  
Date Processed : 26.07.2019 02:09:55

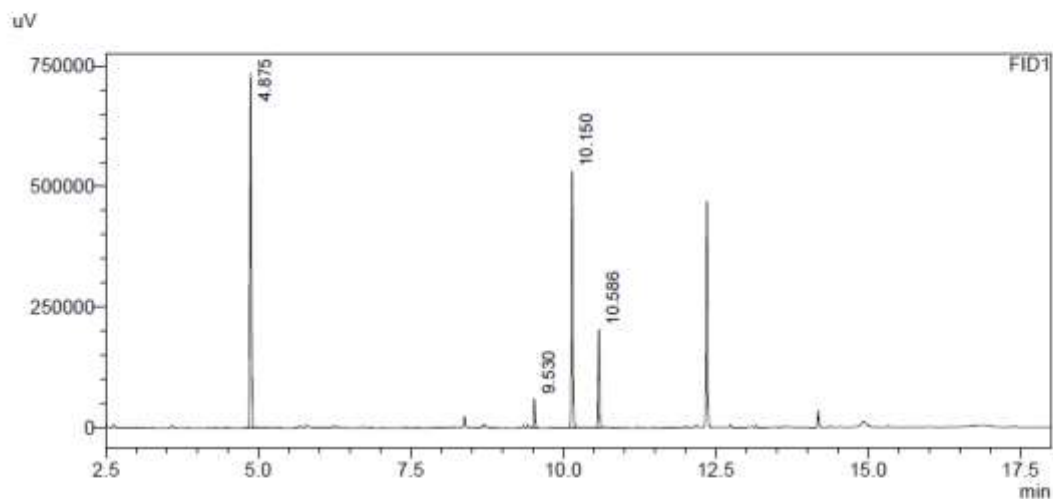

FID1

| Peak# | Ret. Time | Area    | Area%   |
|-------|-----------|---------|---------|
| 1     | 4.875     | 1165572 | 48.808  |
| 2     | 9.530     | 90015   | 3.769   |
| 3     | 10.150    | 843912  | 35.338  |
| 4     | 10.586    | 288599  | 12.085  |
| Total |           | 2388098 | 100.000 |

t = 72 h

Sample Name : t=72\_SOD\_791  
Sample ID :  
Data Filename : t=72\_SOD\_791.gcd  
Method Filename : Methode\_Achiral\_MUC\_Integration.gcm  
Batch Filename : batch.gcb  
Vial # : 42  
Injection Volume : 5 uL  
Date Acquired : 26.07.2019 04:22:10  
Date Processed : 26.07.2019 04:42:53

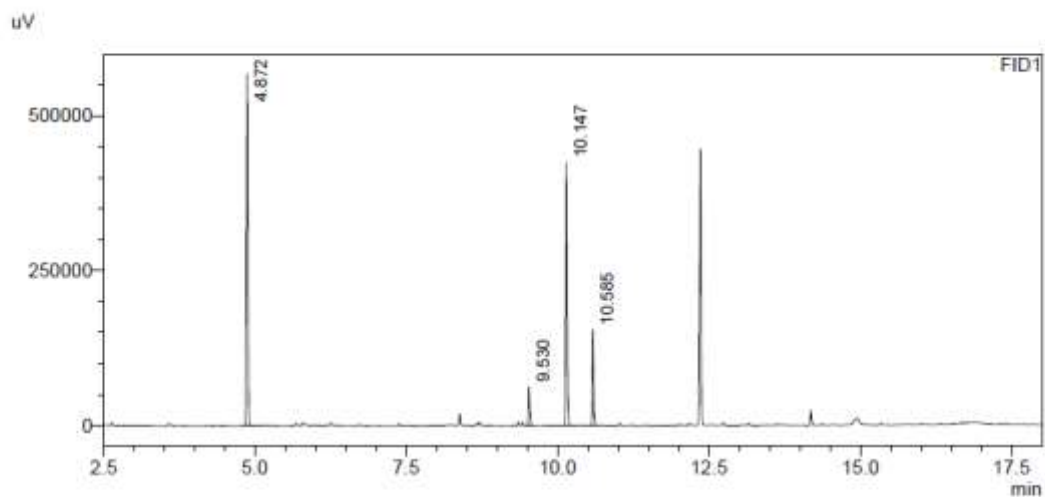

| Peak# | Ret. Time | Area    | Area%   |
|-------|-----------|---------|---------|
| 1     | 4.872     | 915137  | 48.763  |
| 2     | 9.530     | 94279   | 5.024   |
| 3     | 10.147    | 643855  | 34.308  |
| 4     | 10.585    | 223438  | 11.906  |
| Total |           | 1876710 | 100.000 |

### 1.3 Achiral GC spectra for Table 2 of the Manuscript (reactions with different substrates)

#### Entry 1

I, *i*PrOH

t = 0 min

Sample Name : t=0\_SOD\_485  
Sample ID :  
Data Filename : t=0\_SOD\_485.gcd  
Method Filename : Methode\_Achiral\_MUC\_Integration.gcm  
Batch Filename : batch.gcb  
Vial # : 18  
Injection Volume : 5 uL  
Date Acquired : 22.01.2019 23:44:47  
Date Processed : 23.01.2019 00:05:30

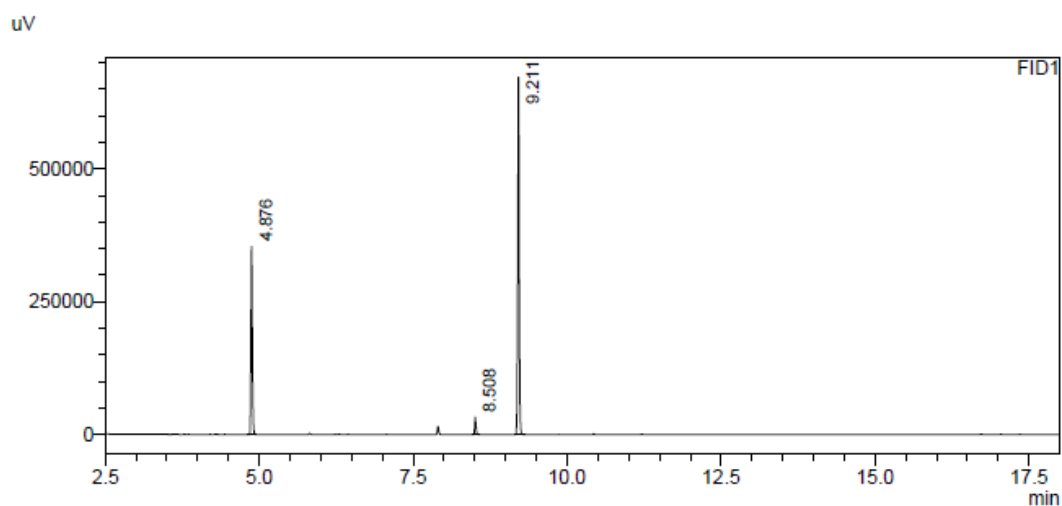

| Peak# | Ret. Time | Area    | Area%   |
|-------|-----------|---------|---------|
| 1     | 4.876     | 562452  | 33.361  |
| 2     | 8.508     | 47013   | 2.789   |
| 3     | 9.211     | 1076475 | 63.850  |
| Total |           | 1685940 | 100.000 |

Sample Name : t=0\_SOD\_657  
Sample ID :  
Data Filename : t=0\_SOD\_657.gcd  
Method Filename : Methode\_Achiral\_MUC\_Integration.gcm  
Batch Filename : batch.gcb  
Vial # : 14  
Injection Volume : 5 uL  
Date Acquired : 25.03.2019 19:43:02  
Date Processed : 25.03.2019 20:03:45

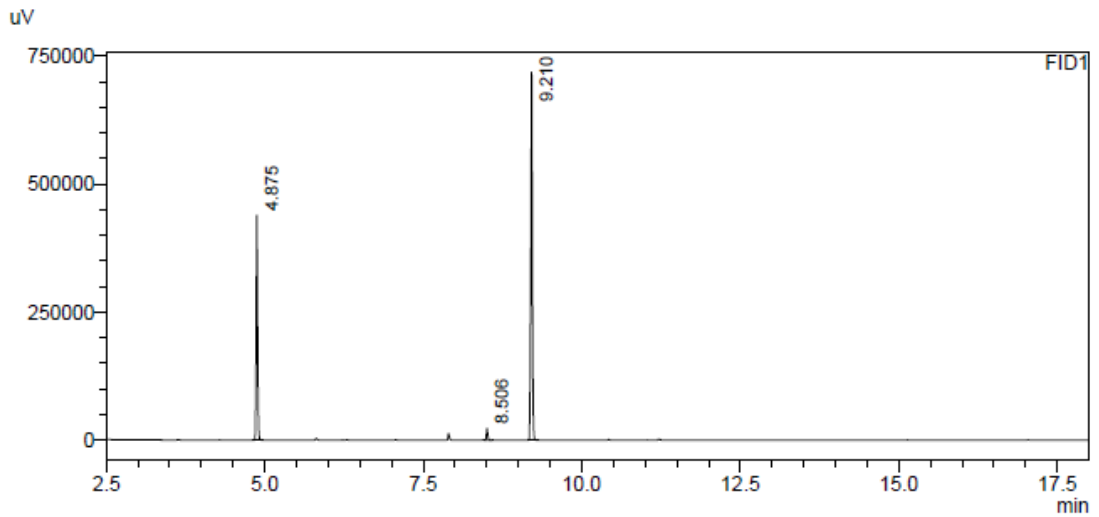

FID1

| Peak# | Ret. Time | Area    | Area%   |
|-------|-----------|---------|---------|
| 1     | 4.875     | 690217  | 36.081  |
| 2     | 8.506     | 33436   | 1.748   |
| 3     | 9.210     | 1189310 | 62.171  |
| Total |           | 1912964 | 100.000 |



Sample Name : t=0\_SOD\_936  
Sample ID :  
Data Filename : t=0\_SOD\_936.gcd  
Method Filename : Methode\_Achiral\_MUC\_Integration.gcm  
Batch Filename : achiralGC.gcb  
Vial # : 13  
Injection Volume : 5 uL  
Date Acquired : 24.01.2020 19:42:49  
Date Processed : 24.01.2020 20:03:33

uV

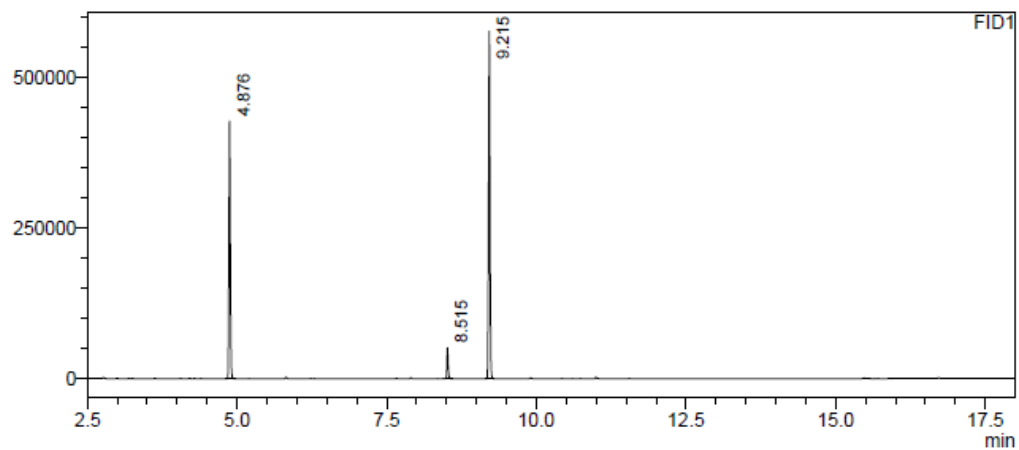

FID1

| Peak# | Ret. Time | Area    | Area%   |
|-------|-----------|---------|---------|
| 1     | 4.876     | 674187  | 40.471  |
| 2     | 8.515     | 73497   | 4.412   |
| 3     | 9.215     | 918177  | 55.117  |
| Total |           | 1665860 | 100.000 |

t = 24 h

Sample Name : t=24\_SOD\_485  
Sample ID :  
Data Filename : t=24\_SOD\_485.gcd  
Method Filename : Methode\_Achiral\_MUC\_Integration.gcm  
Batch Filename : batch.gcb  
Vial # : 70  
Injection Volume : 5 uL  
Date Acquired : 23.01.2019 23:26:17  
Date Processed : 23.01.2019 23:46:59

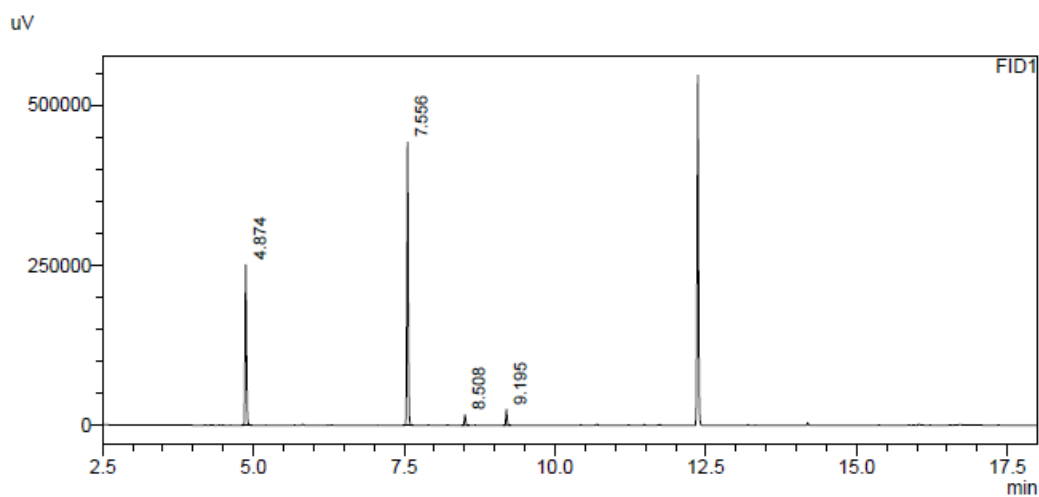

| Peak# | Ret. Time | Area    | Area%   |
|-------|-----------|---------|---------|
| 1     | 4.874     | 387502  | 34.972  |
| 2     | 7.556     | 661126  | 59.666  |
| 3     | 8.508     | 23577   | 2.128   |
| 4     | 9.195     | 35842   | 3.235   |
| Total |           | 1108047 | 100.000 |

Sample Name : t=24\_SOD\_657  
 Sample ID :  
 Data Filename : t=24\_SOD\_657.gcd  
 Method Filename : Methode\_Achiral\_MUC\_Integration.gcm  
 Batch Filename : batch.gcb  
 Vial # : 4  
 Injection Volume : 5 uL  
 Date Acquired : 26.03.2019 19:36:34  
 Date Processed : 26.03.2019 19:57:19

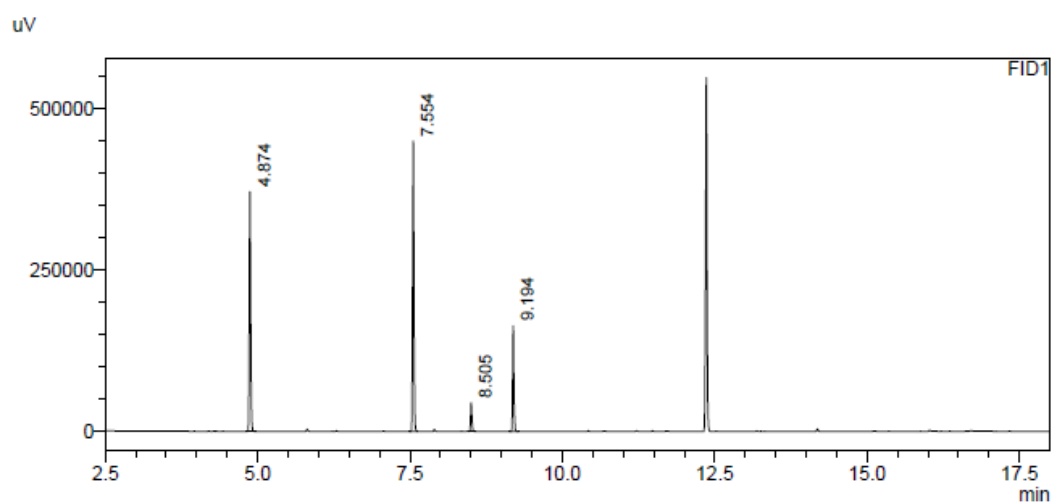

FID1

| Peak# | Ret. Time | Area    | Area%   |
|-------|-----------|---------|---------|
| 1     | 4.874     | 585414  | 37.862  |
| 2     | 7.554     | 665433  | 43.037  |
| 3     | 8.505     | 64485   | 4.171   |
| 4     | 9.194     | 230846  | 14.930  |
| Total |           | 1546178 | 100.000 |

Sample Name : t=24\_SOD\_936  
 Sample ID :  
 Data Filename : t=24\_SOD\_936.gcd  
 Method Filename : Methode\_Achiral\_MUC\_Integration.gcm  
 Batch Filename : achiralGC.gcb  
 Vial # : 12  
 Injection Volume : 5 uL  
 Date Acquired : 25.01.2020 17:53:07  
 Date Processed : 25.01.2020 18:13:50

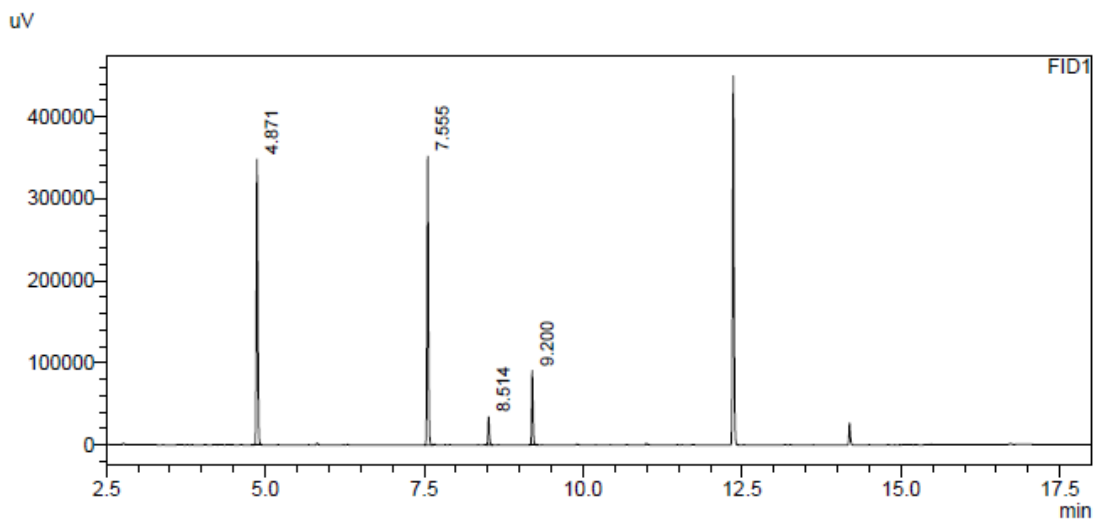

FID1

| Peak# | Ret. Time | Area    | Area%   |
|-------|-----------|---------|---------|
| 1     | 4.871     | 535730  | 43.642  |
| 2     | 7.555     | 514617  | 41.922  |
| 3     | 8.514     | 48762   | 3.972   |
| 4     | 9.200     | 128437  | 10.463  |
| Total |           | 1227546 | 100.000 |

t = 48 h

Sample Name : t=48\_SOD\_485  
Sample ID :  
Data Filename : t=48\_SOD\_485.gcd  
Method Filename : Methode\_Achiral\_MUC\_Integration.gcm  
Batch Filename : batch.gcb  
Vial # : 122  
Injection Volume : 5 uL  
Date Acquired : 25.01.2019 05:19:32  
Date Processed : 25.01.2019 05:40:16

uV

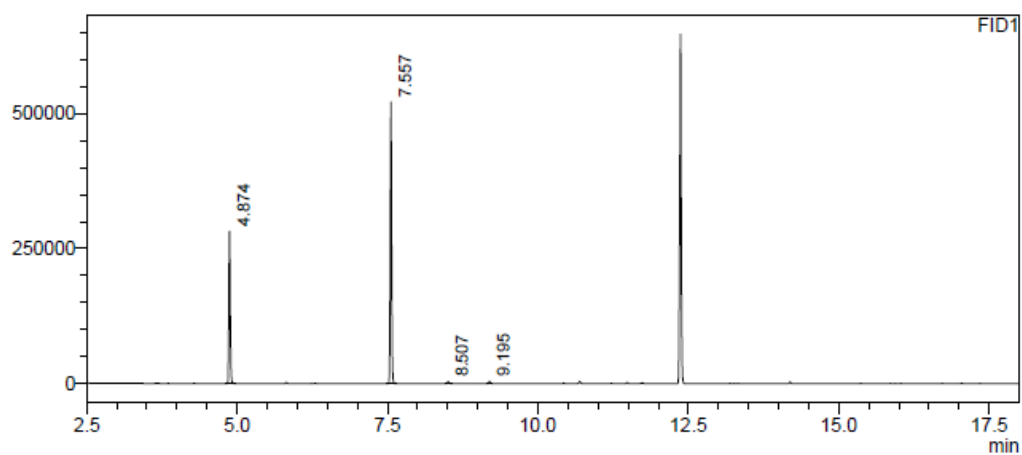

FID1

| Peak# | Ret. Time | Area    | Area%   |
|-------|-----------|---------|---------|
| 1     | 4.874     | 436854  | 35.056  |
| 2     | 7.557     | 797934  | 64.031  |
| 3     | 8.507     | 5639    | 0.452   |
| 4     | 9.195     | 5740    | 0.461   |
| Total |           | 1246167 | 100.000 |

Sample Name : t=48\_SOD\_657  
Sample ID :  
Data Filename : t=48\_SOD\_657.gcd  
Method Filename : Methode\_Achiral\_MUC\_Integration.gcm  
Batch Filename : batch.gcb  
Vial # : 4  
Injection Volume : 5 uL  
Date Acquired : 27.03.2019 20:43:01  
Date Processed : 27.03.2019 21:03:45

uV

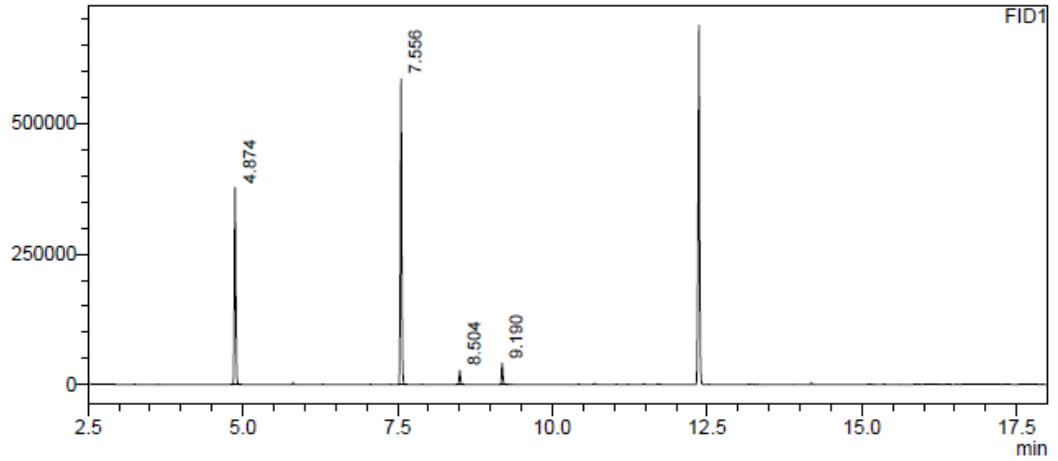

FID1

| Peak# | Ret. Time | Area    | Area%   |
|-------|-----------|---------|---------|
| 1     | 4.874     | 595167  | 37.498  |
| 2     | 7.556     | 893719  | 56.308  |
| 3     | 8.504     | 39143   | 2.466   |
| 4     | 9.190     | 59170   | 3.728   |
| Total |           | 1587200 | 100.000 |

Sample Name : t=48\_SOD-936  
Sample ID :  
Data Filename : t=48\_SOD\_936.gcd  
Method Filename : Methode\_Achiral\_MUC\_Integration.gcm  
Batch Filename : achiralGC.gcb  
Vial # : 12  
Injection Volume : 5 uL  
Date Acquired : 27.01.2020 18:25:40  
Date Processed : 27.01.2020 18:46:24

uV

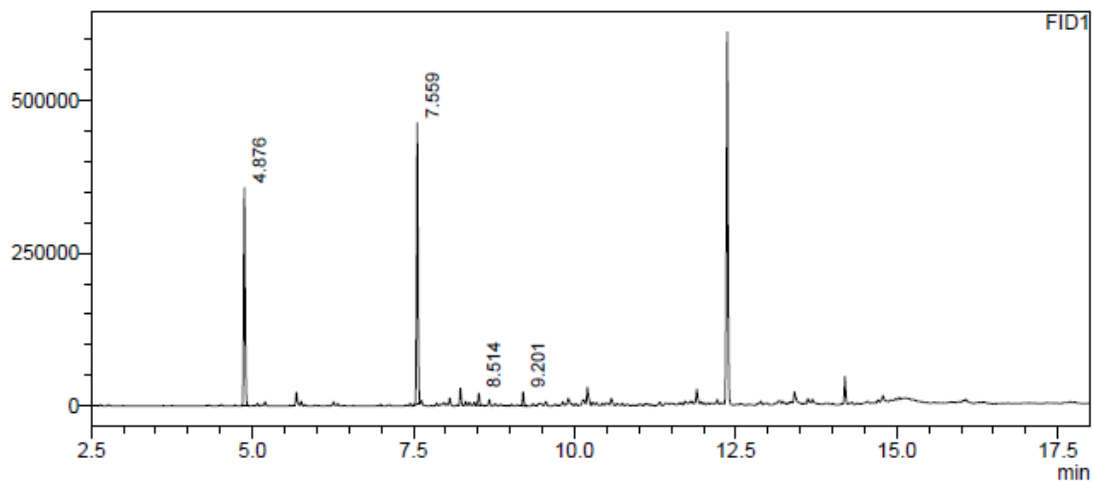

FID1

| Peak# | Ret. Time | Area    | Area%   |
|-------|-----------|---------|---------|
| 1     | 4.876     | 562014  | 42.705  |
| 2     | 7.559     | 690257  | 52.449  |
| 3     | 8.514     | 31620   | 2.403   |
| 4     | 9.201     | 32155   | 2.443   |
| Total |           | 1316045 | 100.000 |

t = 72 h

Sample Name : t=72\_SOD\_485  
Sample ID :  
Data Filename : t=72\_SOD\_485.gcd  
Method Filename : Methode\_Achiral\_MUC\_Integration.gcm  
Batch Filename : batch.gcb  
Vial # : 10  
Injection Volume : 5 uL  
Date Acquired : 25.01.2019 23:04:20  
Date Processed : 25.01.2019 23:25:04

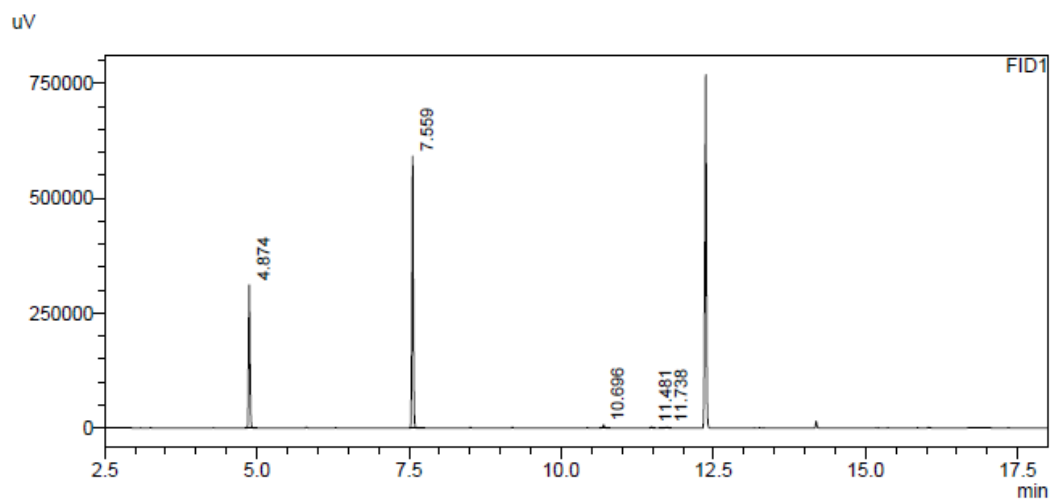

| Peak# | Ret. Time | Area    | Area%   |
|-------|-----------|---------|---------|
| 1     | 4.874     | 491587  | 34.659  |
| 2     | 7.559     | 904794  | 63.792  |
| 3     | 10.696    | 12617   | 0.890   |
| 4     | 11.481    | 3713    | 0.262   |
| 5     | 11.738    | 5649    | 0.398   |
| Total |           | 1418360 | 100.000 |



Sample Name : t=72\_SOD\_657  
 Sample ID :  
 Data Filename : t=72\_SOD\_657.gcd  
 Method Filename : Methode\_Achiral\_MUC\_Integration.gcm  
 Batch Filename : batch.gcb  
 Vial # : 4  
 Injection Volume : 5 uL  
 Date Acquired : 28.03.2019 18:55:44  
 Date Processed : 28.03.2019 19:16:27

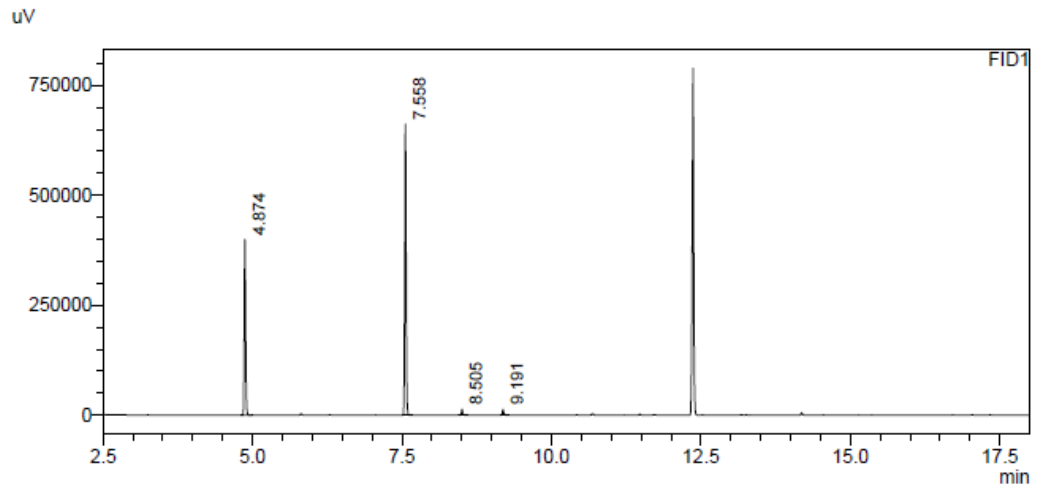

FID1

| Peak# | Ret. Time | Area    | Area%   |
|-------|-----------|---------|---------|
| 1     | 4.874     | 632310  | 37.138  |
| 2     | 7.558     | 1031893 | 60.607  |
| 3     | 8.505     | 19472   | 1.144   |
| 4     | 9.191     | 18912   | 1.111   |
| Total |           | 1702587 | 100.000 |

Sample Name : t=72\_SOD-936  
 Sample ID :  
 Data Filename : t=72\_SOD\_936.gcd  
 Method Filename : Methode\_Achiral\_MUC\_Integration.gcm  
 Batch Filename : achiralGC.gcb  
 Vial # : 45  
 Injection Volume : 5 uL  
 Date Acquired : 28.01.2020 11:21:19  
 Date Processed : 28.01.2020 11:42:02

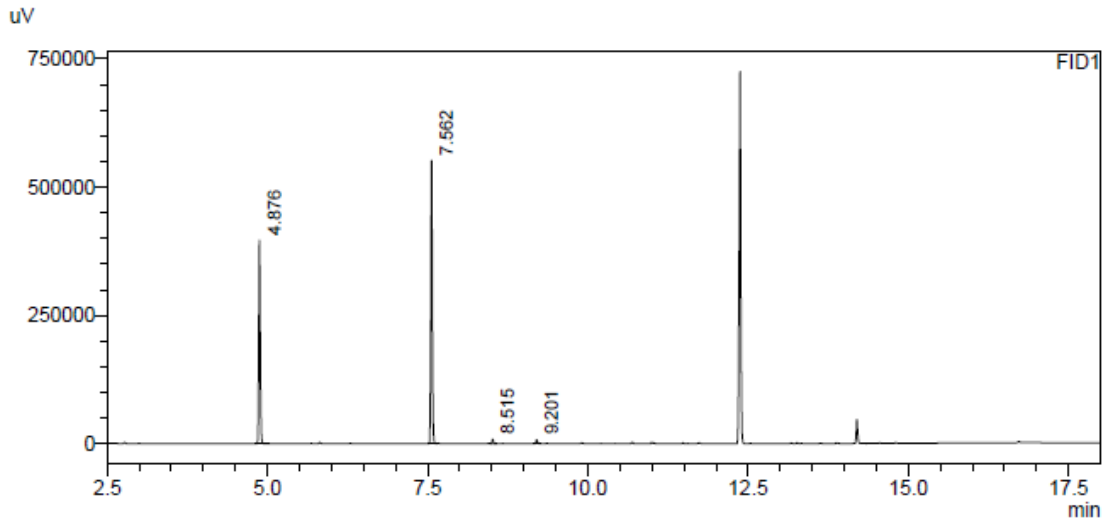

FID1

| Peak# | Ret. Time | Area    | Area%   |
|-------|-----------|---------|---------|
| 1     | 4.876     | 617270  | 41.015  |
| 2     | 7.562     | 864397  | 57.436  |
| 3     | 8.515     | 12438   | 0.826   |
| 4     | 9.201     | 10878   | 0.723   |
| Total |           | 1504984 | 100.000 |

I, no *i*PrOH

t = 0 min

Sample Name : t=0\_SOD\_340  
Sample ID :  
Data Filename : t=0\_SOD\_340.gcd  
Method Filename : Methode\_Achiral\_MUC\_Integration.gcm  
Batch Filename : batch.gcb  
Vial # : 3  
Injection Volume : 5 uL  
Date Acquired : 21.11.2018 13:51:58  
Date Processed : 21.11.2018 14:12:42

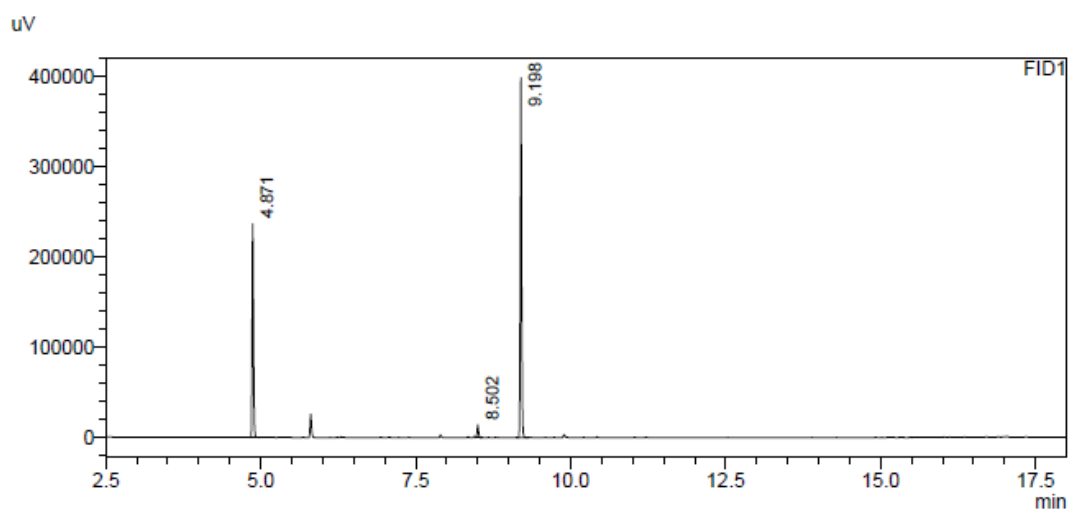

FID1

| Peak# | Ret. Time | Area   | Area%   |
|-------|-----------|--------|---------|
| 1     | 4.871     | 361736 | 37.567  |
| 2     | 8.502     | 19784  | 2.055   |
| 3     | 9.198     | 581399 | 60.379  |
| Total |           | 962919 | 100.000 |

Sample Name : t=0\_SOD\_619  
Sample ID :  
Data Filename : t=0\_SOD\_619.gcd  
Method Filename : Methode\_Achiral\_MUC\_Integration.gcm  
Batch Filename : batch.gcb  
Vial # : 1  
Injection Volume : 5 uL  
Date Acquired : 12.03.2019 17:38:57  
Date Processed : 12.03.2019 17:59:40

uV

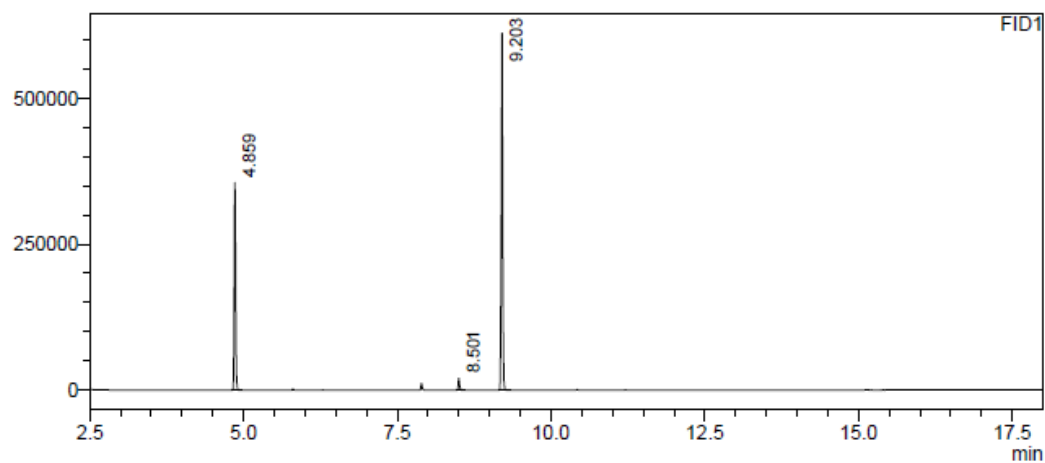

FID1

| Peak# | Ret. Time | Area    | Area%   |
|-------|-----------|---------|---------|
| 1     | 4.859     | 563356  | 36.069  |
| 2     | 8.501     | 29865   | 1.912   |
| 3     | 9.203     | 968654  | 62.019  |
| Total |           | 1561874 | 100.000 |

Sample Name : t=0\_SOD\_925  
 Sample ID :  
 Data Filename : t=0\_SOD\_925.gcd  
 Method Filename : Methode\_Achiral\_MUC\_Integration.gcm  
 Batch Filename : achiralGC.gcb  
 Vial # : 2  
 Injection Volume : 5 uL  
 Date Acquired : 24.01.2020 15:04:30  
 Date Processed : 24.01.2020 15:25:15

uV

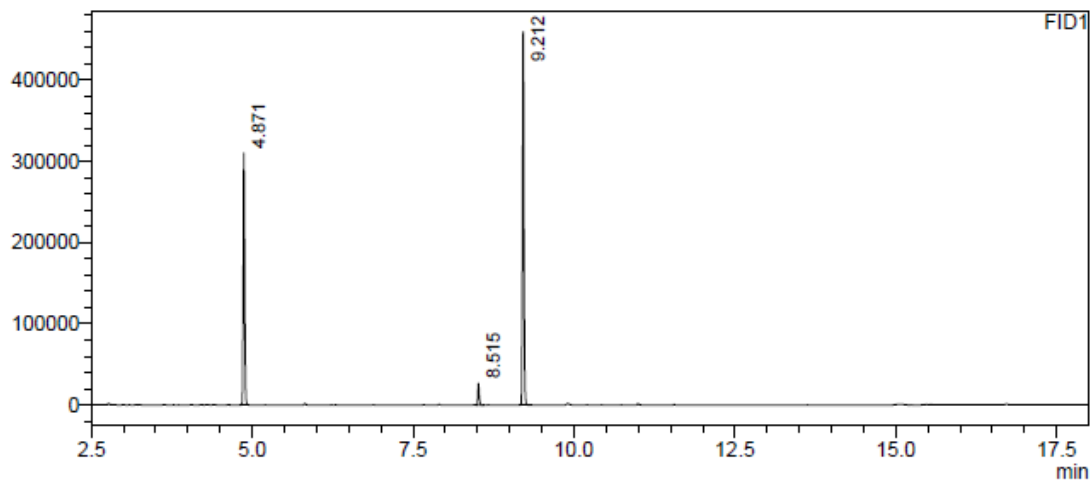

FID1

| Peak# | Ret. Time | Area    | Area%   |
|-------|-----------|---------|---------|
| 1     | 4.871     | 486558  | 39.335  |
| 2     | 8.515     | 38028   | 3.074   |
| 3     | 9.212     | 712374  | 57.591  |
| Total |           | 1236961 | 100.000 |

t = 24 h

Sample Name : t=24\_SOD\_340  
Sample ID :  
Data Filename : t=24\_SOD\_340.gcd  
Method Filename : Methode\_Achiral\_MUC\_Integration.gcm  
Batch Filename : batch.gcb  
Vial # : 15  
Injection Volume : 5 uL  
Date Acquired : 22.11.2018 00:25:29  
Date Processed : 22.11.2018 00:46:12

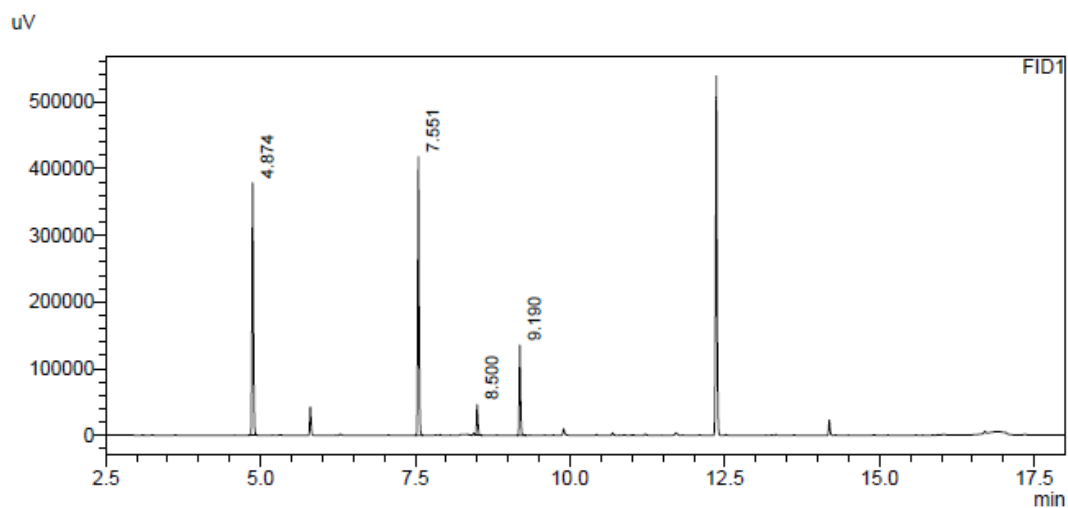

FID1

| Peak# | Ret. Time | Area    | Area%   |
|-------|-----------|---------|---------|
| 1     | 4.874     | 586754  | 40.383  |
| 2     | 7.551     | 609569  | 41.953  |
| 3     | 8.500     | 64084   | 4.411   |
| 4     | 9.190     | 192578  | 13.254  |
| Total |           | 1452985 | 100.000 |

Sample Name : t=24\_SOD\_619  
 Sample ID :  
 Data Filename : t=24\_SOD\_619.gcd  
 Method Filename : Methode\_Achiral\_MUC\_Integration.gcm  
 Batch Filename : batch.gcb  
 Vial # : 1  
 Injection Volume : 5 uL  
 Date Acquired : 13.03.2019 21:02:24  
 Date Processed : 13.03.2019 21:23:07

uV

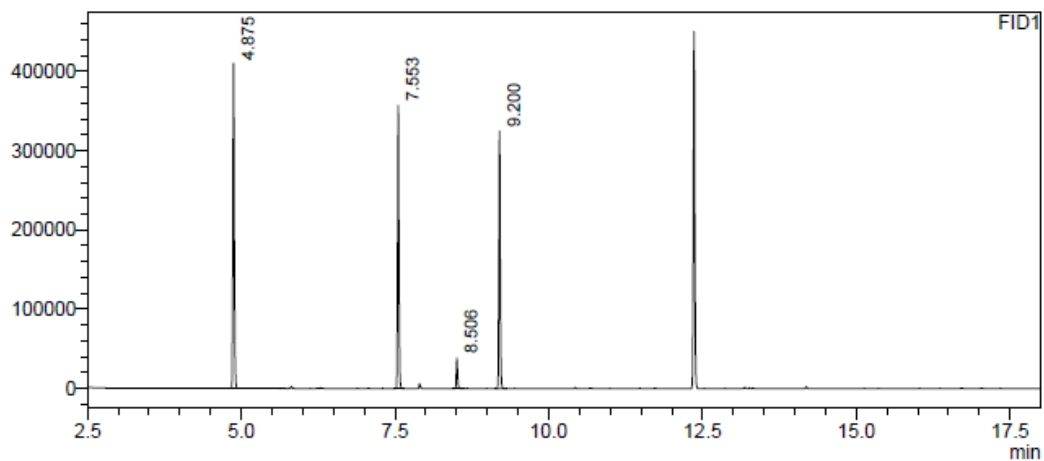

FID1

| Peak# | Ret. Time | Area    | Area%   |
|-------|-----------|---------|---------|
| 1     | 4.875     | 636937  | 37.502  |
| 2     | 7.553     | 527828  | 31.078  |
| 3     | 8.506     | 54427   | 3.205   |
| 4     | 9.200     | 479209  | 28.215  |
| Total |           | 1698401 | 100.000 |

Sample Name : t=24\_SOD\_925  
Sample ID :  
Data Filename : t=24\_SOD\_925.gcd  
Method Filename : Methode\_Achiral\_MUC\_Integration.gcm  
Batch Filename : achiralGC.gcb  
Vial # : 1  
Injection Volume : 5 uL  
Date Acquired : 25.01.2020 13:14:28  
Date Processed : 25.01.2020 13:35:12

uV

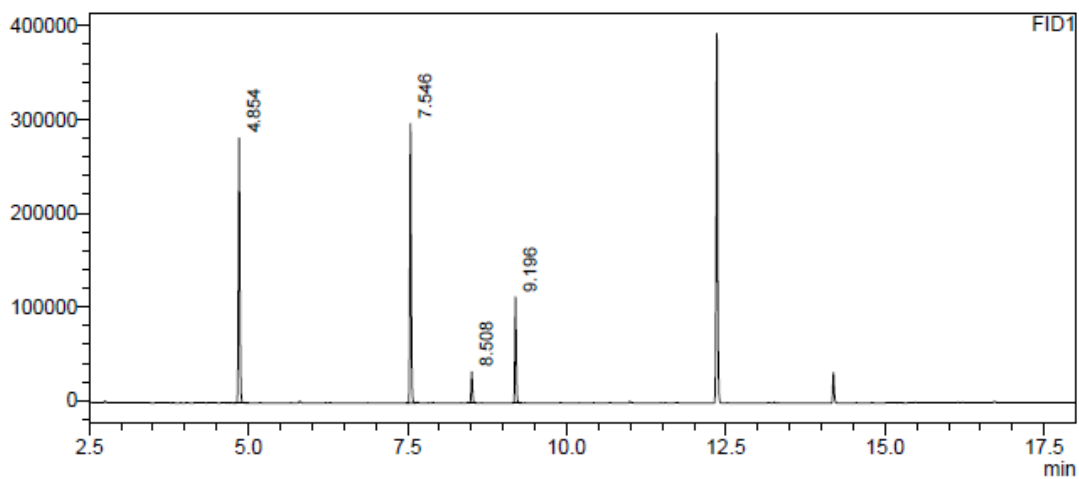

FID1

| Peak# | Ret. Time | Area    | Area%   |
|-------|-----------|---------|---------|
| 1     | 4.854     | 447762  | 40.942  |
| 2     | 7.546     | 435950  | 39.862  |
| 3     | 8.508     | 48612   | 4.445   |
| 4     | 9.196     | 161312  | 14.750  |
| Total |           | 1093636 | 100.000 |



t = 48 h

Sample Name : t=48\_SOD\_340  
Sample ID :  
Data Filename : t=48\_SOD\_340.gcd  
Method Filename : Methode\_Achiral\_MUC\_Integration.gcm  
Batch Filename : batch.gcb  
Vial # : 15  
Injection Volume : 5 uL  
Date Acquired : 22.11.2018 23:42:16  
Date Processed : 23.11.2018 00:02:59

uV

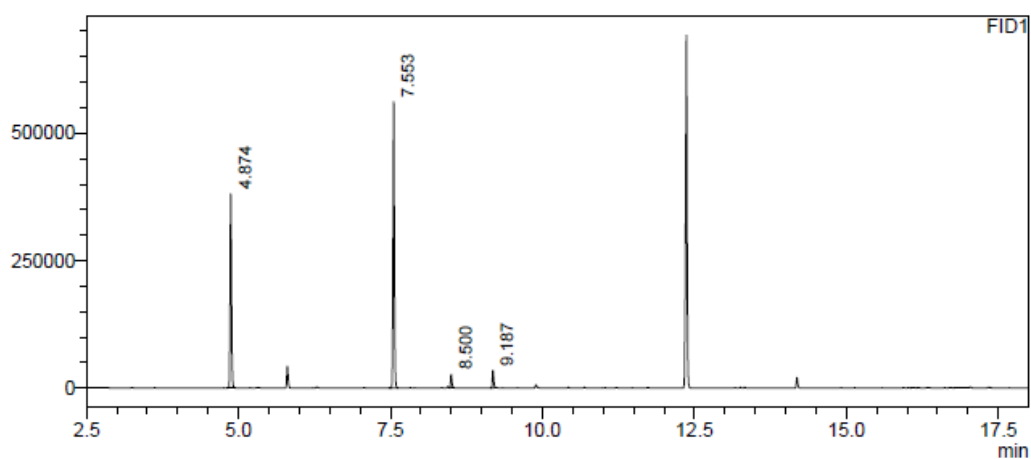

FID1

| Peak# | Ret. Time | Area    | Area%   |
|-------|-----------|---------|---------|
| 1     | 4.874     | 603616  | 39.024  |
| 2     | 7.553     | 856514  | 55.373  |
| 3     | 8.500     | 37357   | 2.415   |
| 4     | 9.187     | 49310   | 3.188   |
| Total |           | 1546798 | 100.000 |

Sample Name : t=48\_SOD\_619  
Sample ID :  
Data Filename : t=48\_SOD\_619.gcd  
Method Filename : Methode\_Achiral\_MUC\_Integration.gcm  
Batch Filename : batch.gcb  
Vial # : 1  
Injection Volume : 5 uL  
Date Acquired : 14.03.2019 20:00:38  
Date Processed : 14.03.2019 20:21:23

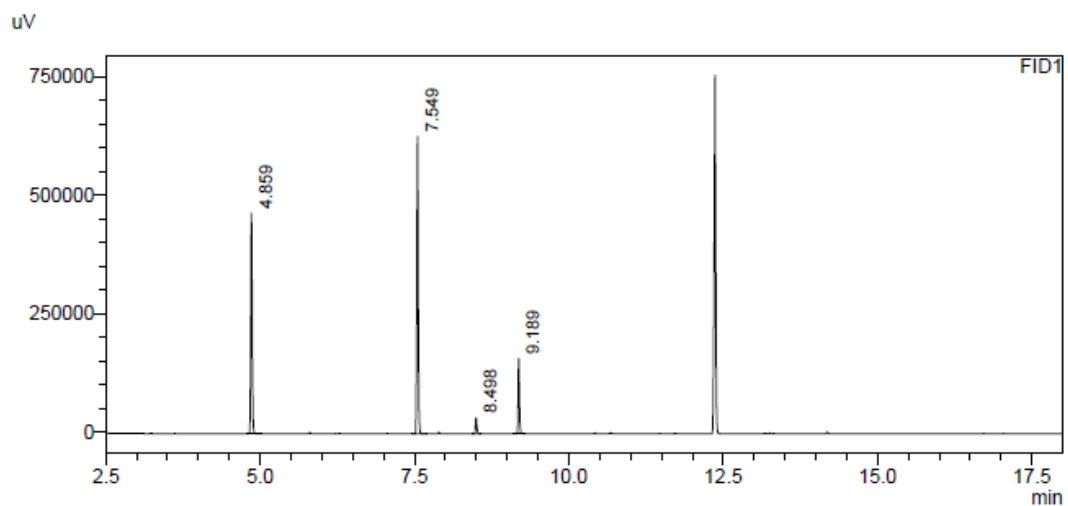

FID1

| Peak# | Ret. Time | Area    | Area%   |
|-------|-----------|---------|---------|
| 1     | 4.859     | 737343  | 37.289  |
| 2     | 7.549     | 963242  | 48.714  |
| 3     | 8.498     | 48572   | 2.456   |
| 4     | 9.189     | 228190  | 11.540  |
| Total |           | 1977347 | 100.000 |

Sample Name : t=48\_SOD-925  
 Sample ID :  
 Data Filename : t=48\_SOD\_925.gcd  
 Method Filename : Methode\_Achiral\_MUC\_Integration.gcm  
 Batch Filename : achiralGC.gcb  
 Vial # : 1  
 Injection Volume : 5 uL  
 Date Acquired : 27.01.2020 13:46:34  
 Date Processed : 27.01.2020 14:07:17

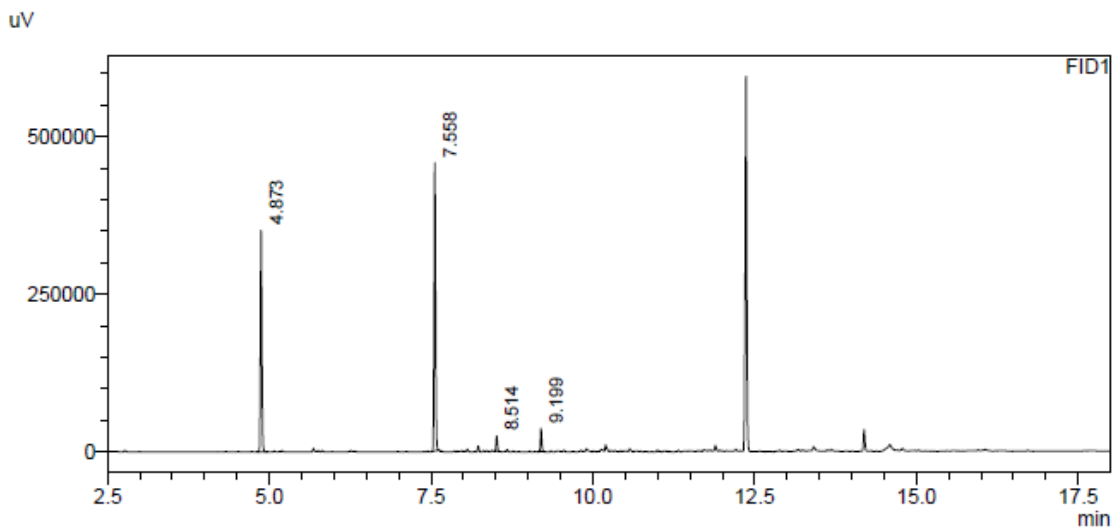

FID1

| Peak# | Ret. Time | Area    | Area%   |
|-------|-----------|---------|---------|
| 1     | 4.873     | 538446  | 41.146  |
| 2     | 7.558     | 683233  | 52.211  |
| 3     | 8.514     | 33885   | 2.589   |
| 4     | 9.199     | 53047   | 4.054   |
| Total |           | 1308611 | 100.000 |

t = 72 h

Sample Name : t=72\_SOD\_340  
Sample ID :  
Data Filename : t=72\_SOD\_340.gcd  
Method Filename : Methode\_Achiral\_MUC\_Integration.gcm  
Batch Filename : batch.gcb  
Vial # : 3  
Injection Volume : 5 uL  
Date Acquired : 23.11.2018 18:34:44  
Date Processed : 23.11.2018 18:55:28

uV

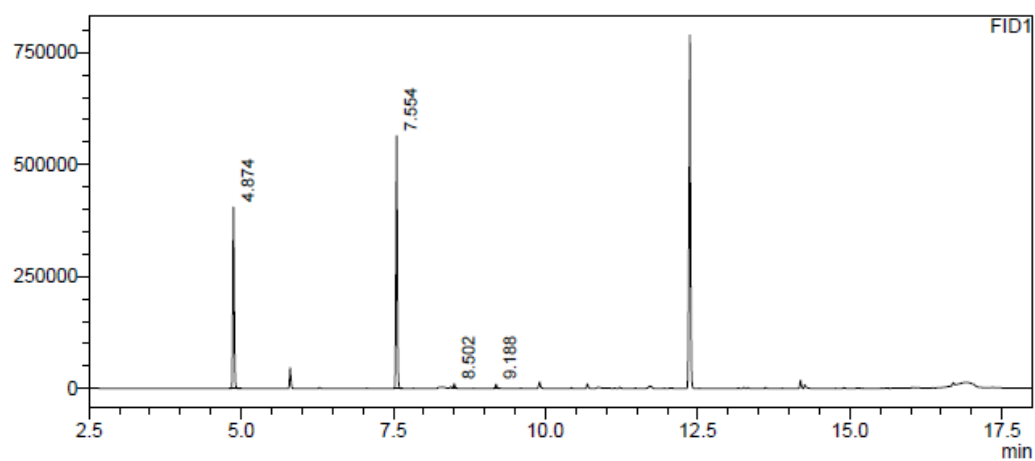

FID1

| Peak# | Ret. Time | Area    | Area%   |
|-------|-----------|---------|---------|
| 1     | 4.874     | 632198  | 41.856  |
| 2     | 7.554     | 852189  | 56.421  |
| 3     | 8.502     | 13412   | 0.888   |
| 4     | 9.188     | 12616   | 0.835   |
| Total |           | 1510415 | 100.000 |

Sample Name : t=72\_SOD\_619  
Sample ID :  
Data Filename : t=72\_SOD\_619.gcd  
Method Filename : Methode\_Achiral\_MUC\_Integration.gcm  
Batch Filename : batch.gcb  
Vial # : 1  
Injection Volume : 5 uL  
Date Acquired : 15.03.2019 17:24:25  
Date Processed : 15.03.2019 17:45:10

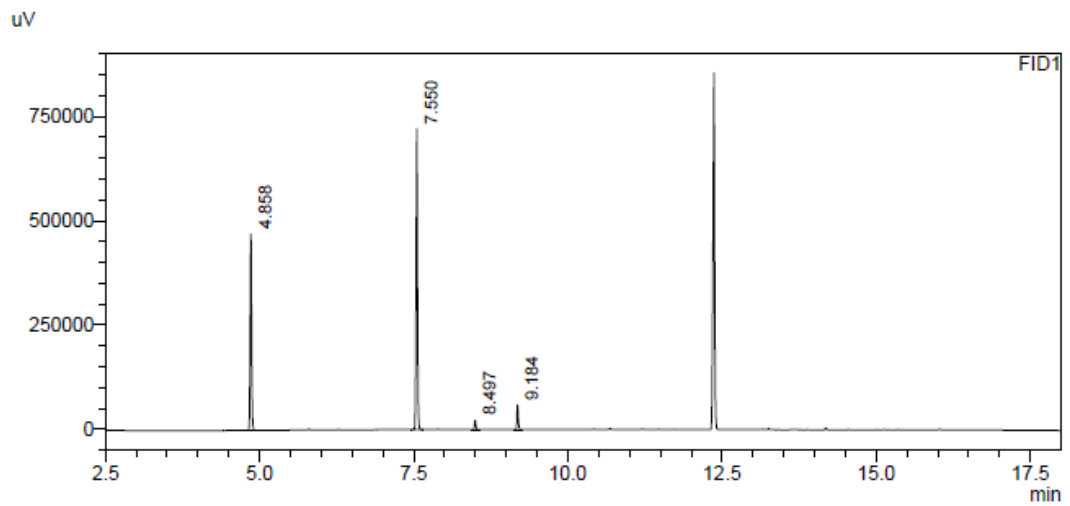

| Peak# | Ret. Time | Area    | Area%   |
|-------|-----------|---------|---------|
| 1     | 4.858     | 743438  | 37.111  |
| 2     | 7.550     | 1143854 | 57.099  |
| 3     | 8.497     | 31984   | 1.597   |
| 4     | 9.184     | 84001   | 4.193   |
| Total |           | 2003277 | 100.000 |

Sample Name : t=72\_SOD-925  
 Sample ID :  
 Data Filename : t=72\_SOD\_925.gcd  
 Method Filename : Methode\_Achiral\_MUC\_Integration.gcm  
 Batch Filename : achiralGC.gcb  
 Vial # : 34  
 Injection Volume : 5 uL  
 Date Acquired : 28.01.2020 06:42:01  
 Date Processed : 28.01.2020 07:02:45

uV

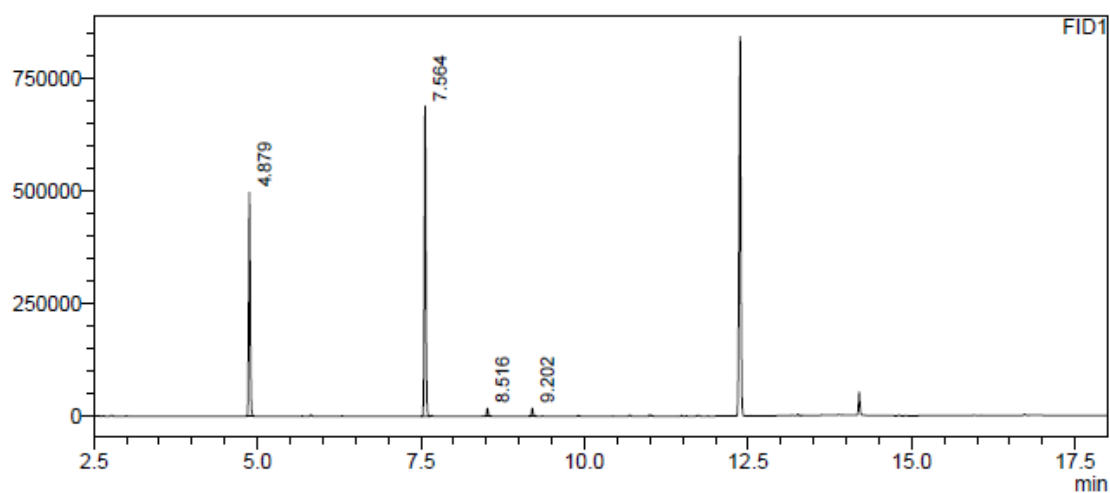

FID1

| Peak# | Ret. Time | Area    | Area%   |
|-------|-----------|---------|---------|
| 1     | 4.879     | 776090  | 40.769  |
| 2     | 7.564     | 1076176 | 56.532  |
| 3     | 8.516     | 25848   | 1.358   |
| 4     | 9.202     | 25533   | 1.341   |
| Total |           | 1903647 | 100.000 |

No I, *i*PrOH

t = 0 min

Sample Name : t=0\_SOD-1021  
Sample ID :  
Data Filename : t=0\_SOD-1021.gcd  
Method Filename : Methode\_Achiral\_MUC\_Integration.gcm  
Batch Filename : achiralGC.gcb  
Vial # : 37  
Injection Volume : 5 uL  
Date Acquired : 20.02.2020 08:22:05  
Date Processed : 20.02.2020 08:42:49

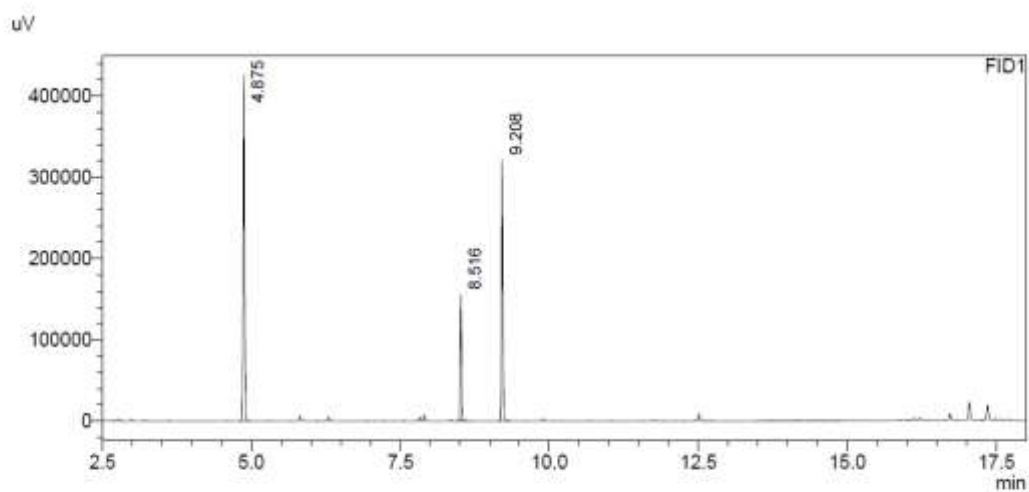

| Peak# | Ret. Time | Area    | Area%   |
|-------|-----------|---------|---------|
| 1     | 4.875     | 675169  | 49.080  |
| 2     | 8.516     | 224008  | 16.284  |
| 3     | 9.208     | 476475  | 34.636  |
| Total |           | 1375651 | 100.000 |

Sample Name : t=0\_SOD-1022  
Sample ID :  
Data Filename : t=0\_SOD-1022.god  
Method Filename : Methode\_Achiral\_MUC\_Integration.gcm  
Batch Filename : achiralGC.gcb  
Vial # : 38  
Injection Volume : 5 uL  
Date Acquired : 20.02.2020 08:47:28  
Date Processed : 20.02.2020 09:08:13

uV

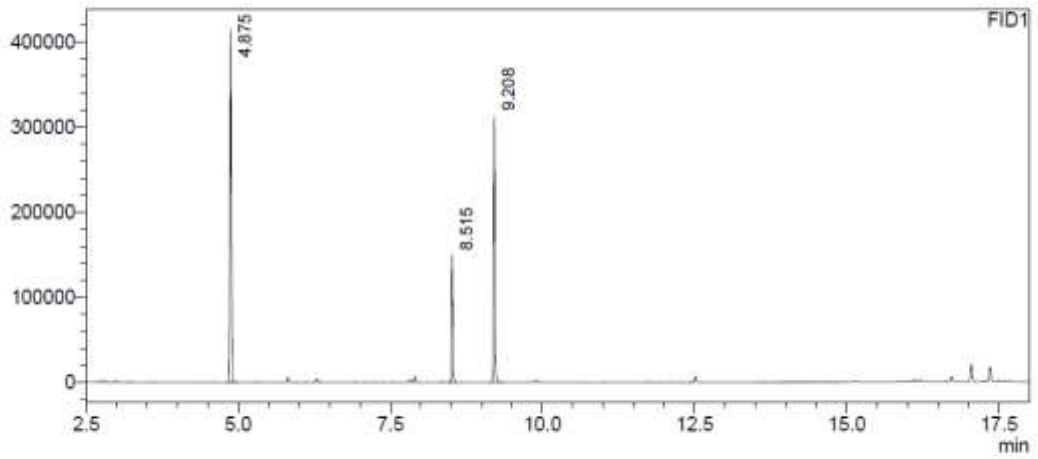

FID1

| Peak# | Ret. Time | Area    | Area%   |
|-------|-----------|---------|---------|
| 1     | 4.875     | 661825  | 49.100  |
| 2     | 8.515     | 214555  | 15.918  |
| 3     | 9.208     | 471521  | 34.982  |
| Total |           | 1347901 | 100.000 |



Sample Name : t=0\_SOD-1023  
Sample ID :  
Data Filename : t=0\_SOD-1023.gcd  
Method Filename : Methode\_Achiral\_MUC\_Integration.gcm  
Batch Filename : achiralGC.gcb  
Vial # : 39  
Injection Volume : 5 uL  
Date Acquired : 20.02.2020 09:12:53  
Date Processed : 20.02.2020 09:33:36

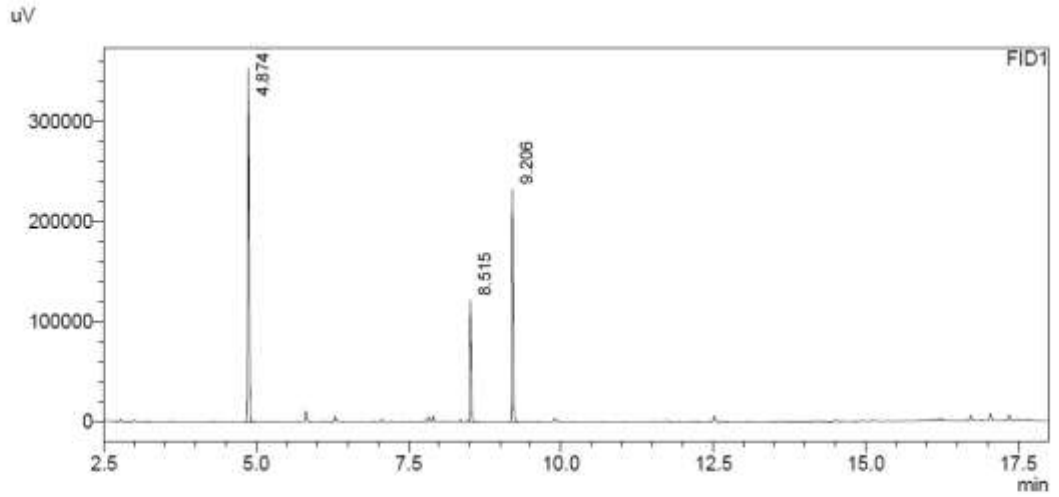

FID1

| Peak# | Ret. Time | Area    | Area%   |
|-------|-----------|---------|---------|
| 1     | 4.874     | 548792  | 51.848  |
| 2     | 8.515     | 171276  | 16.182  |
| 3     | 9.206     | 338398  | 31.971  |
| Total |           | 1058466 | 100.000 |

t = 24 h

Sample Name : t=24\_SOD-1021  
Sample ID :  
Data Filename : t=24\_SOD-1021.gcd  
Method Filename : Methode\_Achiral\_MUC\_Integration.gcm  
Batch Filename : achiralGC.gcb  
Vial # : 4  
Injection Volume : 5 uL  
Date Acquired : 20.02.2020 23:35:35  
Date Processed : 20.02.2020 23:56:19

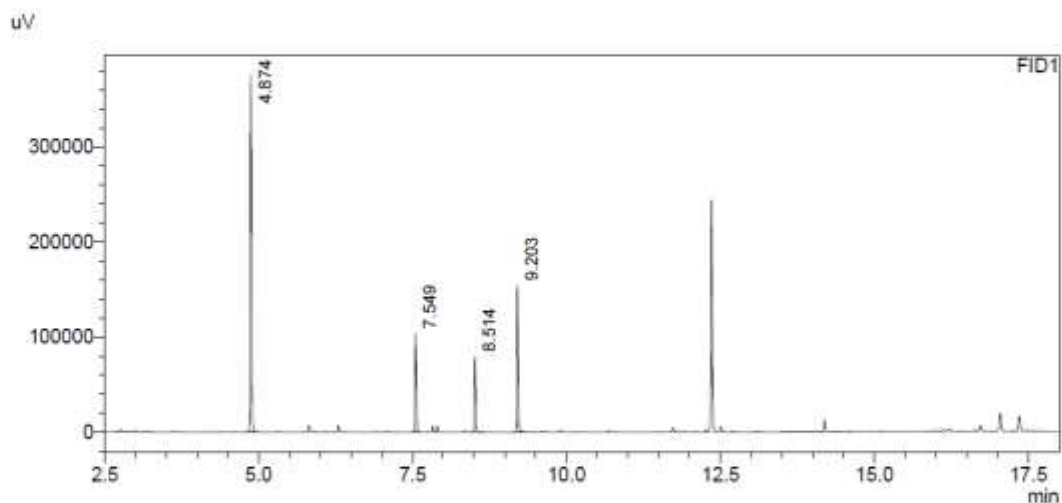

FID1

| Peak# | Ret. Time | Area    | Area%   |
|-------|-----------|---------|---------|
| 1     | 4.874     | 594656  | 54.849  |
| 2     | 7.549     | 149963  | 13.832  |
| 3     | 8.514     | 115048  | 10.612  |
| 4     | 9.203     | 224504  | 20.707  |
| Total |           | 1084172 | 100.000 |

Sample Name : t=24\_SOD-1022  
Sample ID :  
Data Filename : t=24\_SOD-1022.gcd  
Method Filename : Methode\_Achiral\_MUC\_Integration.gcm  
Batch Filename : achiralGC.gcb  
Vial # : 5  
Injection Volume : 5 uL  
Date Acquired : 21.02.2020 00:00:56  
Date Processed : 21.02.2020 00:21:39

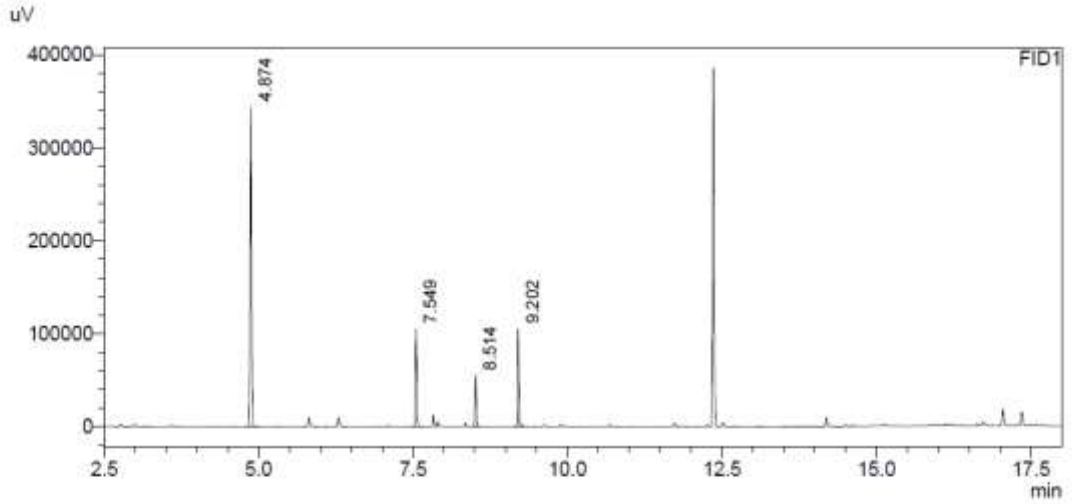

FID1

| Peak# | Ret. Time | Area   | Area%   |
|-------|-----------|--------|---------|
| 1     | 4.874     | 552290 | 58.811  |
| 2     | 7.549     | 152285 | 16.216  |
| 3     | 8.514     | 80140  | 8.534   |
| 4     | 9.202     | 154376 | 16.439  |
| Total |           | 939090 | 100.000 |

Sample Name : t=24\_SOD-1023  
Sample ID :  
Data Filename : t=24\_SOD-1023.gcd  
Method Filename : Methode\_Achiral\_MUC\_Integration.gcm  
Batch Filename : achiralGC.gcb  
Vial # : 6  
Injection Volume : 5 uL  
Date Acquired : 21.02.2020 00:26:15  
Date Processed : 21.02.2020 00:46:58

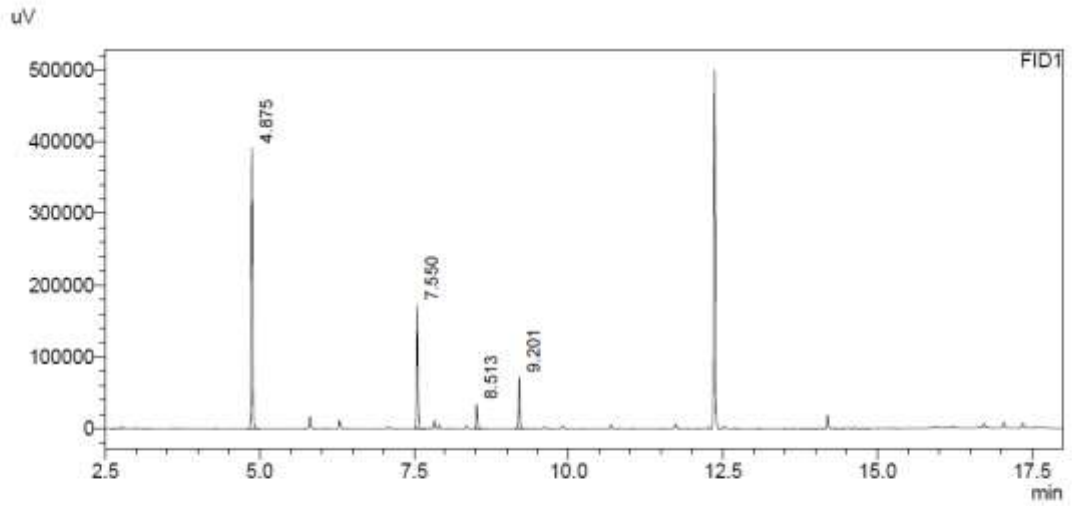

FID1

| Peak# | Ret. Time | Area    | Area%   |
|-------|-----------|---------|---------|
| 1     | 4.875     | 619085  | 60.603  |
| 2     | 7.550     | 249005  | 24.376  |
| 3     | 8.513     | 49889   | 4.884   |
| 4     | 9.201     | 103558  | 10.137  |
| Total |           | 1021537 | 100.000 |

t = 48 h

Sample Name : t=48\_SOD-1021  
Sample ID :  
Data Filename : t=48\_SOD-1021.gcd  
Method Filename : Methode\_Achiral\_MUC\_Integration.gcm  
Batch Filename : achiralGC.gcb  
Vial # : 4  
Injection Volume : 5 uL  
Date Acquired : 21.02.2020 20:43:27  
Date Processed : 21.02.2020 21:04:11

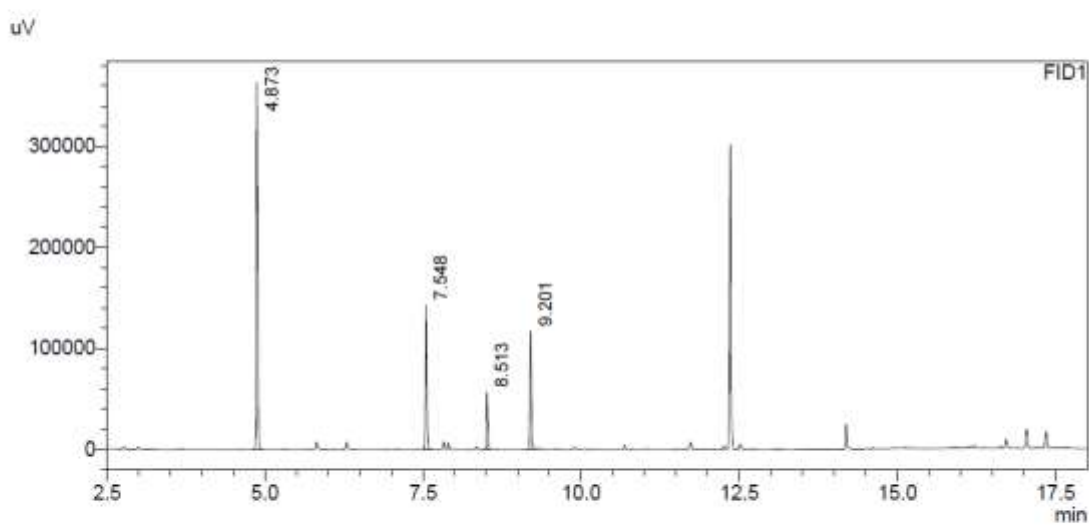

FID1

| Peak# | Ret. Time | Area    | Area%   |
|-------|-----------|---------|---------|
| 1     | 4.873     | 570620  | 55.595  |
| 2     | 7.548     | 207202  | 20.187  |
| 3     | 8.513     | 81061   | 7.898   |
| 4     | 9.201     | 167511  | 16.320  |
| Total |           | 1026393 | 100.000 |

Sample Name : t=48\_SOD-1022  
Sample ID :  
Data Filename : t=48\_SOD-1022.gcd  
Method Filename : Methode\_Achiral\_MUC\_Integration.gcm  
Batch Filename : achiralGC.gcb  
Vial # : 5  
Injection Volume : 5 uL  
Date Acquired : 21.02.2020 21:08:48  
Date Processed : 21.02.2020 21:29:31

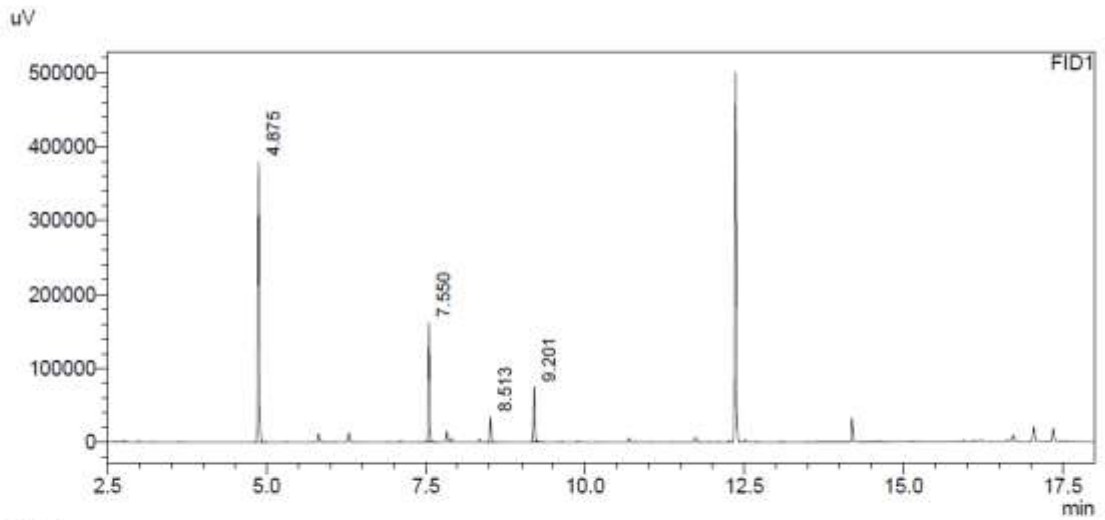

FID1

| Peak# | Ret. Time | Area   | Area%   |
|-------|-----------|--------|---------|
| 1     | 4.875     | 602689 | 60.350  |
| 2     | 7.550     | 235394 | 23.571  |
| 3     | 8.513     | 49159  | 4.922   |
| 4     | 9.201     | 111416 | 11.157  |
| Total |           | 998658 | 100.000 |

Sample Name : t=48\_SOD-1023  
Sample ID :  
Data Filename : t=48\_SOD-1023.gcd  
Method Filename : Methode\_Achiral\_MUC\_Integration.gcm  
Batch Filename : achiralGC.gcb  
Vial # : 6  
Injection Volume : 5 uL  
Date Acquired : 21.02.2020 21:34:07  
Date Processed : 21.02.2020 21:54:50

uV

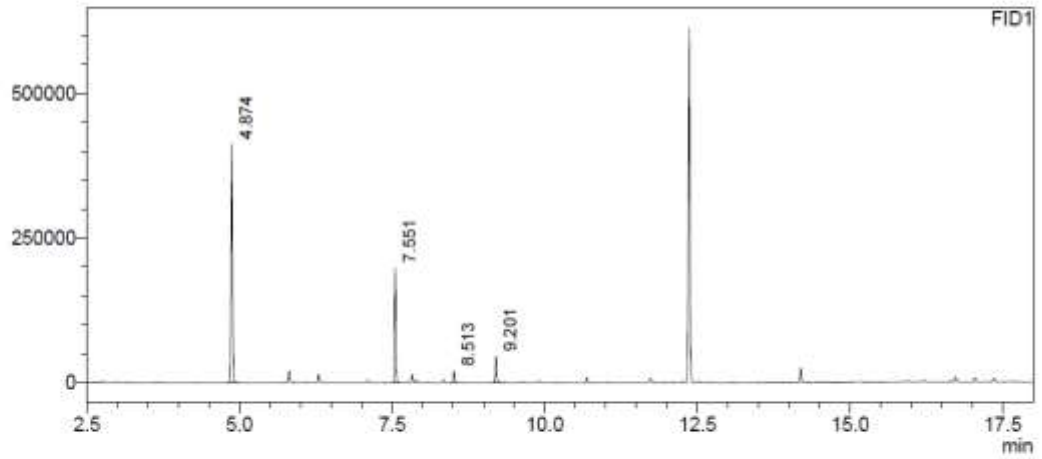

| Peak# | Ret. Time | Area    | Area%   |
|-------|-----------|---------|---------|
| 1     | 4.874     | 653271  | 62.975  |
| 2     | 7.551     | 288314  | 27.793  |
| 3     | 8.513     | 29272   | 2.822   |
| 4     | 9.201     | 66498   | 6.410   |
| Total |           | 1037355 | 100.000 |

t = 72 h

Sample Name : t=72\_SOD-1021  
Sample ID :  
Data Filename : t=72\_SOD-1021.gcd  
Method Filename : Methode\_Achiral\_MUC\_Integration.gcm  
Batch Filename : achiralGC.gcb  
Vial # : 4  
Injection Volume : 5 uL  
Date Acquired : 26.02.2020 18:53:09  
Date Processed : 26.02.2020 19:13:53

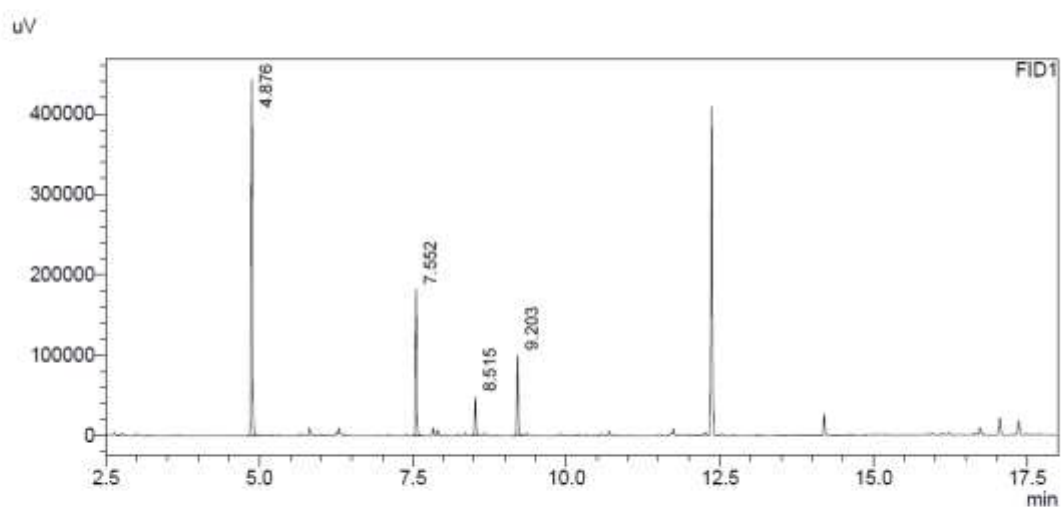

FID1

| Peak# | Ret. Time | Area    | Area%   |
|-------|-----------|---------|---------|
| 1     | 4.876     | 701745  | 59.270  |
| 2     | 7.552     | 264855  | 22.370  |
| 3     | 8.515     | 69382   | 5.860   |
| 4     | 9.203     | 147988  | 12.499  |
| Total |           | 1183971 | 100.000 |



Sample Name : t=72\_SOD-1022  
Sample ID :  
Data Filename : t=72\_SOD-1022.gcd  
Method Filename : Methode\_Achiral\_MUC\_Integration.gcm  
Batch Filename : achiralGC.gcb  
Vial # : 5  
Injection Volume : 5 uL  
Date Acquired : 26.02.2020 19:18:29  
Date Processed : 26.02.2020 19:39:12

uV

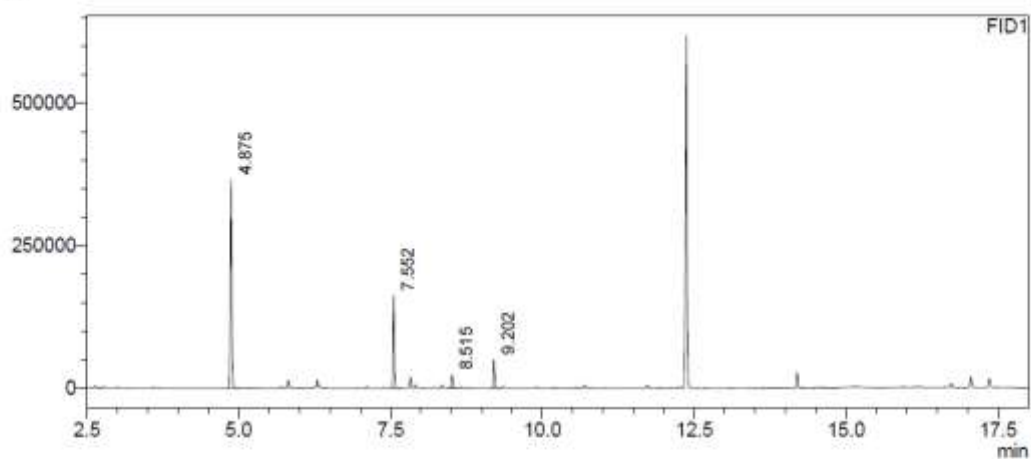

FID1

| Peak# | Ret. Time | Area   | Area%   |
|-------|-----------|--------|---------|
| 1     | 4.875     | 583131 | 62.597  |
| 2     | 7.552     | 237769 | 25.524  |
| 3     | 8.515     | 33910  | 3.640   |
| 4     | 9.202     | 76758  | 8.240   |
| Total |           | 931568 | 100.000 |

Sample Name : t=72\_SOD-1023  
 Sample ID :  
 Data Filename : t=72\_SOD-1023.gcd  
 Method Filename : Methode\_Achiral\_MUC\_Integration.gcm  
 Batch Filename : achiralGC.gcb  
 Vial # : 6  
 Injection Volume : 5 uL  
 Date Acquired : 26.02.2020 19:43:52  
 Date Processed : 26.02.2020 20:04:36

uV

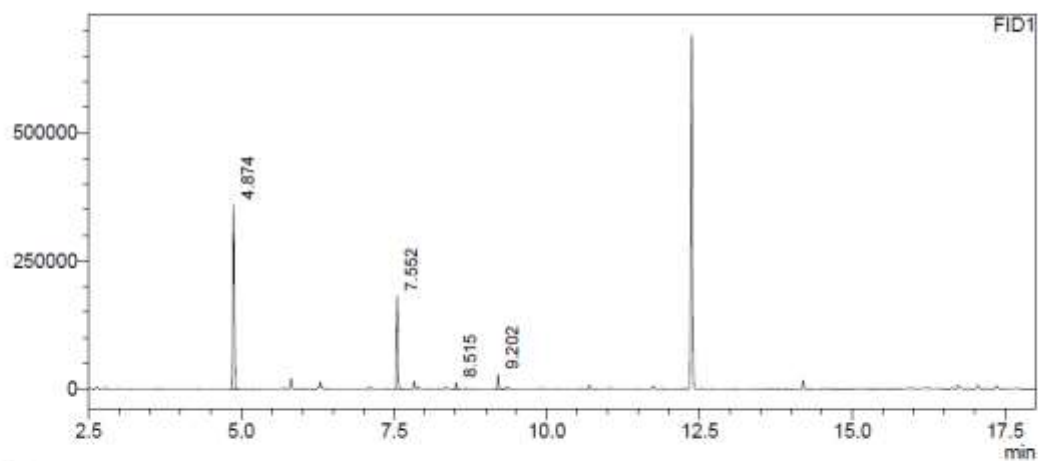

FID1

| Peak# | Ret. Time | Area   | Area%   |
|-------|-----------|--------|---------|
| 1     | 4.874     | 578603 | 64.008  |
| 2     | 7.552     | 262985 | 29.093  |
| 3     | 8.515     | 17943  | 1.985   |
| 4     | 9.202     | 44420  | 4.914   |
| Total |           | 903951 | 100.000 |

No I, no *i*PrOH

**t = 0 min**

Sample Name : t=0\_SOD-1018  
Sample ID :  
Data Filename : t=0\_SOD-1018.gcd  
Method Filename : Methode\_Achiral\_MUC\_Integration.gcm  
Batch Filename : achiralGC.gcb  
Vial # : 34  
Injection Volume : 5 uL  
Date Acquired : 20.02.2020 07:06:01  
Date Processed : 20.02.2020 07:26:44

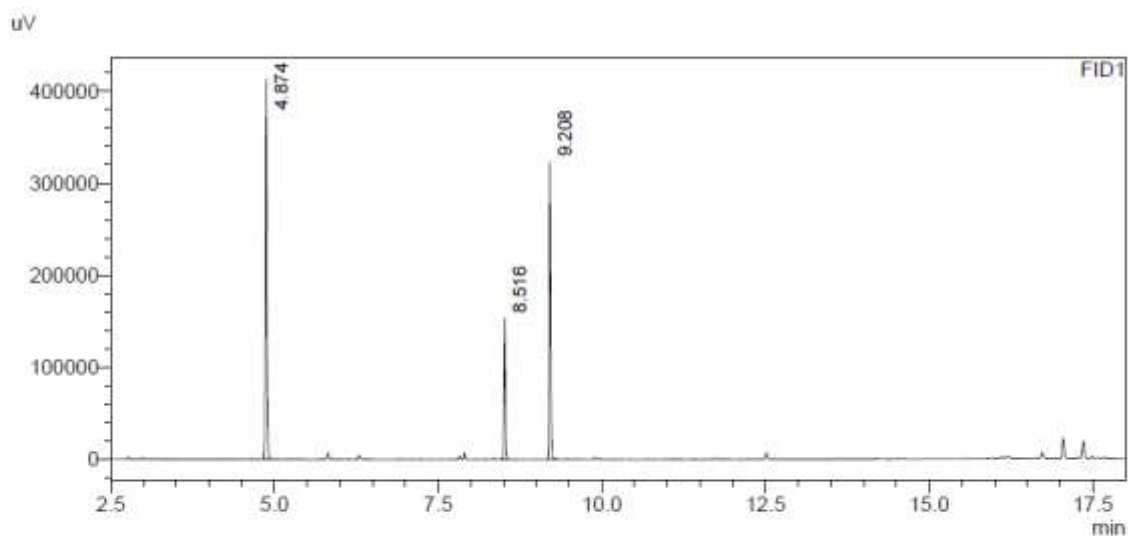

FID1

| Peak# | Ret. Time | Area    | Area%   |
|-------|-----------|---------|---------|
| 1     | 4.874     | 646792  | 48.190  |
| 2     | 8.516     | 218047  | 16.246  |
| 3     | 9.208     | 477334  | 35.564  |
| Total |           | 1342174 | 100.000 |

Sample Name : t=0\_SOD-1019  
 Sample ID :  
 Data Filename : t=0\_SOD-1019.gcd  
 Method Filename : Methode\_Achiral\_MUC\_Integration.gcm  
 Batch Filename : achiralGC.gcb  
 Vial # : 35  
 Injection Volume : 5 uL  
 Date Acquired : 20.02.2020 07:31:24  
 Date Processed : 20.02.2020 07:52:08

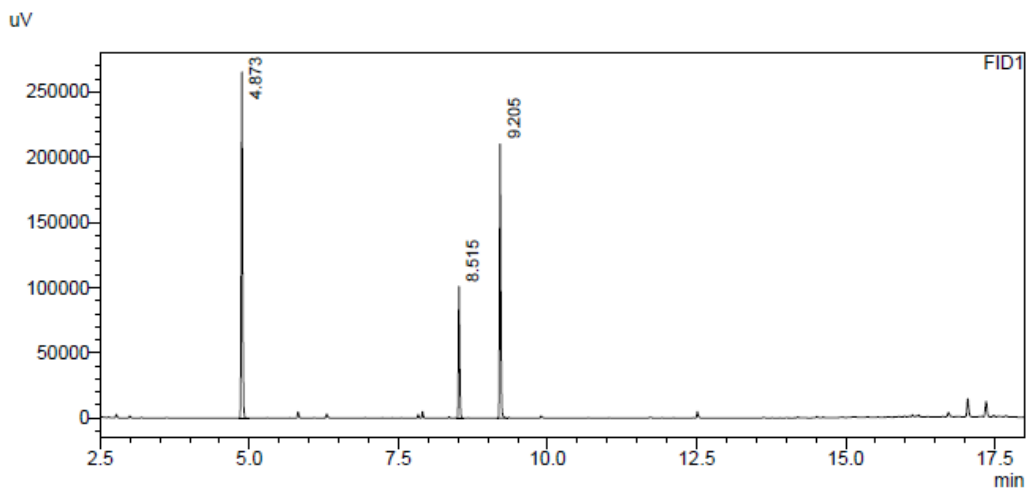

FID1

| Peak# | Ret. Time | Area   | Area%   |
|-------|-----------|--------|---------|
| 1     | 4.873     | 411708 | 47.850  |
| 2     | 8.515     | 144549 | 16.800  |
| 3     | 9.205     | 304158 | 35.350  |
| Total |           | 860415 | 100.000 |

Sample Name : t=0\_SOD-1020  
 Sample ID :  
 Data Filename : t=0\_SOD-1020.gcd  
 Method Filename : Methode\_Achiral\_MUC\_Integration.gcm  
 Batch Filename : achiralGC.gcb  
 Vial # : 36  
 Injection Volume : 5 uL  
 Date Acquired : 20.02.2020 07:56:43  
 Date Processed : 20.02.2020 08:17:27

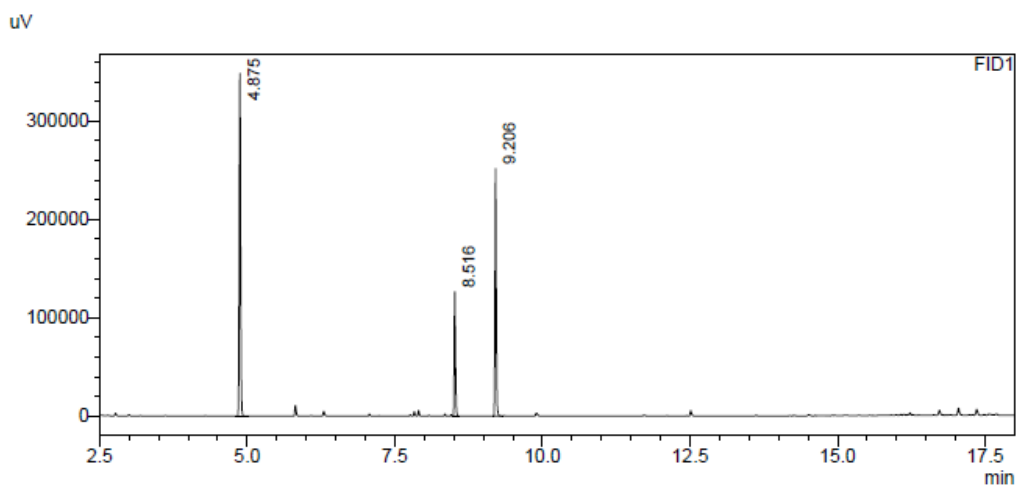

FID1

| Peak# | Ret. Time | Area    | Area%   |
|-------|-----------|---------|---------|
| 1     | 4.875     | 543442  | 49.831  |
| 2     | 8.516     | 179165  | 16.429  |
| 3     | 9.206     | 367956  | 33.740  |
| Total |           | 1090563 | 100.000 |

t = 24 h

Sample Name : t=24\_SOD-1018  
Sample ID :  
Data Filename : t=24\_SOD-1018.gcd  
Method Filename : Methode\_Achiral\_MUC\_Integration.gcm  
Batch Filename : achiralGC.gcb  
Vial # : 1  
Injection Volume : 5 uL  
Date Acquired : 20.02.2020 22:19:35  
Date Processed : 20.02.2020 22:40:19

uV

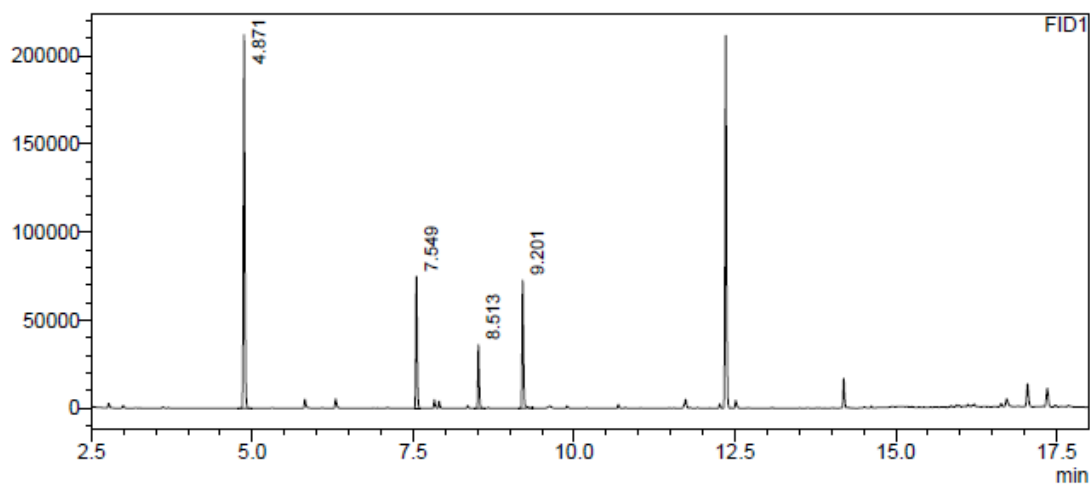

FID1

| Peak# | Ret. Time | Area   | Area%   |
|-------|-----------|--------|---------|
| 1     | 4.871     | 332997 | 55.471  |
| 2     | 7.549     | 107464 | 17.901  |
| 3     | 8.513     | 51820  | 8.632   |
| 4     | 9.201     | 108027 | 17.995  |
| Total |           | 600307 | 100.000 |

Sample Name : t=24\_SOD-1019  
 Sample ID :  
 Data Filename : t=24\_SOD-1019.gcd  
 Method Filename : Methode\_Achiral\_MUC\_Integration.gcm  
 Batch Filename : achiralGC.gcb  
 Vial # : 2  
 Injection Volume : 5 uL  
 Date Acquired : 20.02.2020 22:44:55  
 Date Processed : 20.02.2020 23:05:39

uV

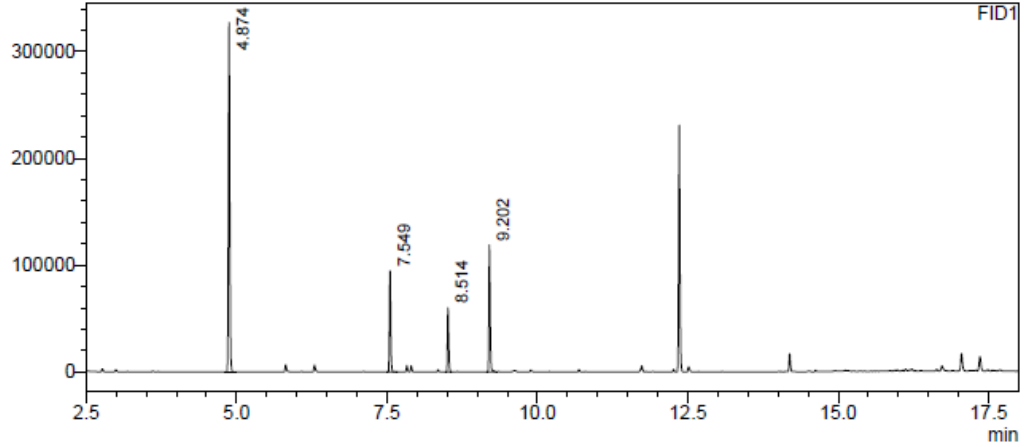

FID1

| Peak# | Ret. Time | Area   | Area%   |
|-------|-----------|--------|---------|
| 1     | 4.874     | 516308 | 56.453  |
| 2     | 7.549     | 137997 | 15.089  |
| 3     | 8.514     | 87624  | 9.581   |
| 4     | 9.202     | 172647 | 18.877  |
| Total |           | 914577 | 100.000 |

Sample Name : t=24\_SOD-1020  
 Sample ID :  
 Data Filename : t=24\_SOD-1020.gcd  
 Method Filename : Methode\_Achiral\_MUC\_Integration.gcm  
 Batch Filename : achiralGC.gcb  
 Vial # : 3  
 Injection Volume : 5 uL  
 Date Acquired : 20.02.2020 23:10:16  
 Date Processed : 21.02.2020 09:11:32

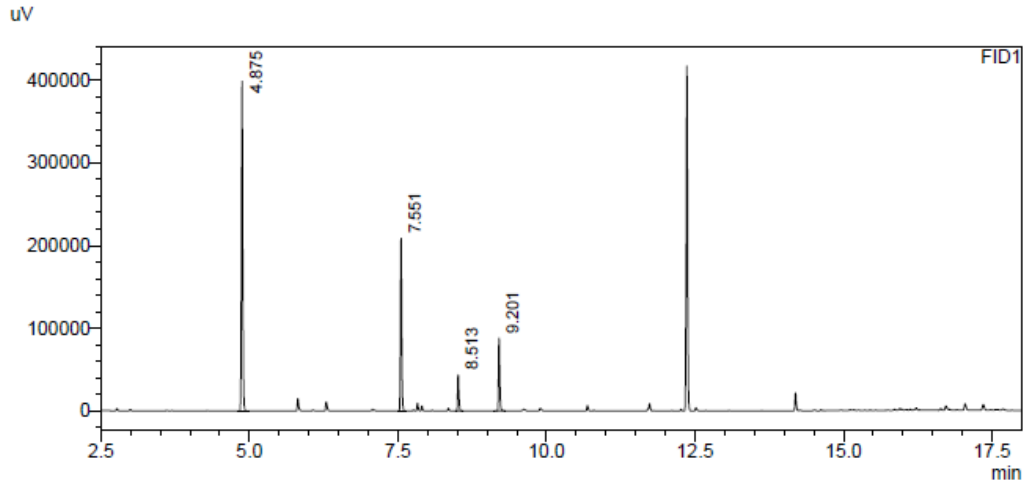

FID1

| Peak# | Ret. Time | Area    | Area%   |
|-------|-----------|---------|---------|
| 1     | 4.875     | 620465  | 55.574  |
| 2     | 7.551     | 304081  | 27.236  |
| 3     | 8.513     | 62475   | 5.596   |
| 4     | 9.201     | 129449  | 11.595  |
| Total |           | 1116471 | 100.000 |



t = 48 h

Sample Name : t=48\_SOD-1018  
Sample ID :  
Data Filename : t=48\_SOD-1018.gcd  
Method Filename : Methode\_Achiral\_MUC\_Integration.gcm  
Batch Filename : achiralGC.gcb  
Vial # : 1  
Injection Volume : 5 uL  
Date Acquired : 21.02.2020 19:27:32  
Date Processed : 21.02.2020 19:48:16

uV

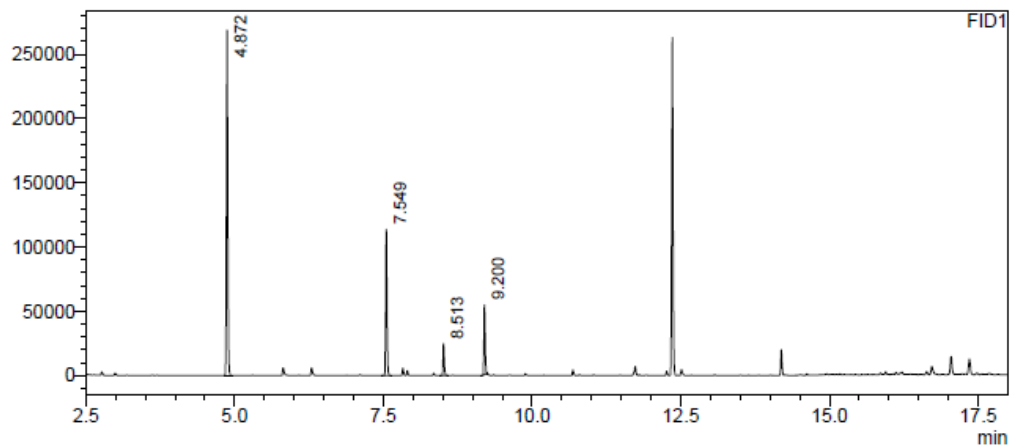

FID1

| Peak# | Ret. Time | Area   | Area%   |
|-------|-----------|--------|---------|
| 1     | 4.872     | 420277 | 60.262  |
| 2     | 7.549     | 165851 | 23.781  |
| 3     | 8.513     | 35359  | 5.070   |
| 4     | 9.200     | 75934  | 10.888  |
| Total |           | 697421 | 100.000 |

Sample Name : t=48\_SOD-1019  
Sample ID :  
Data Filename : t=48\_SOD-1019.gcd  
Method Filename : Methode\_Achiral\_MUC\_Integration.gcm  
Batch Filename : achiralGC.gcb  
Vial # : 2  
Injection Volume : 5 uL  
Date Acquired : 21.02.2020 19:52:49  
Date Processed : 21.02.2020 20:13:34

uV

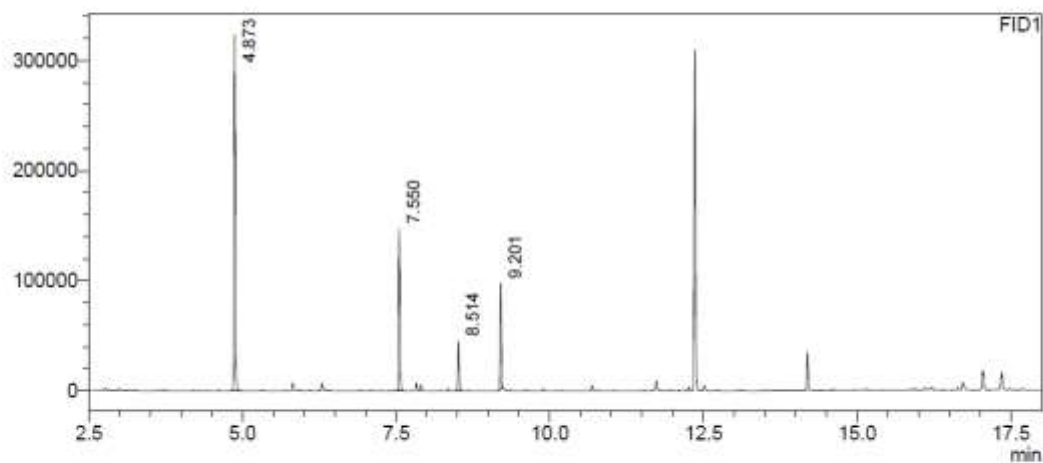

| Peak# | Ret. Time | Area   | Area%   |
|-------|-----------|--------|---------|
| 1     | 4.873     | 512774 | 55.509  |
| 2     | 7.550     | 213432 | 23.105  |
| 3     | 8.514     | 65993  | 7.144   |
| 4     | 9.201     | 131565 | 14.242  |
| Total |           | 923763 | 100.000 |

Sample Name : t=48\_SOD-1020  
Sample ID :  
Data Filename : t=48\_SOD-1020.god  
Method Filename : Methode\_Achiral\_MUC\_Integration.gcm  
Batch Filename : achiralGC.gcb  
Vial # : 3  
Injection Volume : 5 uL  
Date Acquired : 21.02.2020 20:18:06  
Date Processed : 21.02.2020 20:38:50

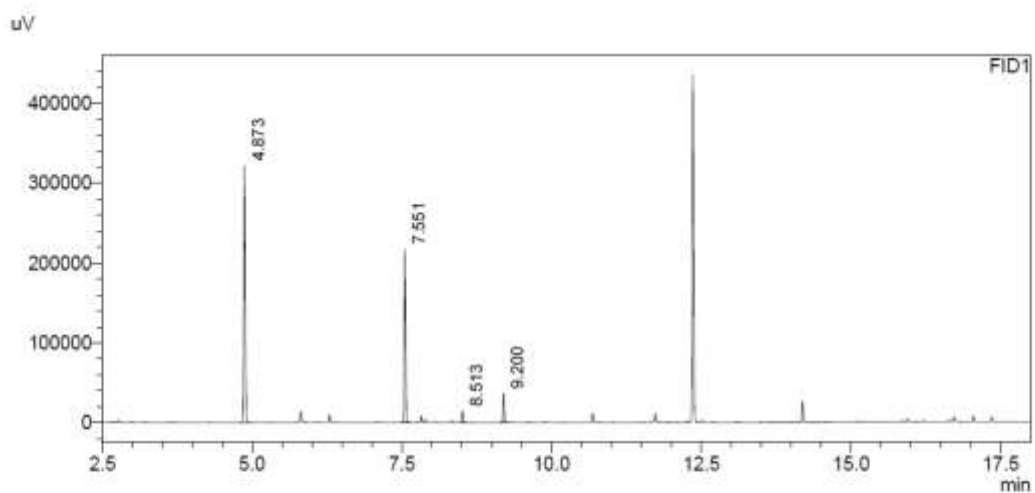

| Peak# | Ret. Time | Area   | Area%   |
|-------|-----------|--------|---------|
| 1     | 4.873     | 510910 | 56.468  |
| 2     | 7.551     | 319765 | 35.342  |
| 3     | 8.513     | 21639  | 2.392   |
| 4     | 9.200     | 52460  | 5.798   |
| Total |           | 904773 | 100.000 |

**t = 72 h**

Sample Name : t=72\_SOD-1018  
Sample ID :  
Data Filename : t=72\_SOD-1018.gcd  
Method Filename : Methode\_Achiral\_MUC\_Integration.gcm  
Batch Filename : achiralGC.gcb  
Vial # : 1  
Injection Volume : 5 uL  
Date Acquired : 26.02.2020 17:11:47  
Date Processed : 26.02.2020 17:32:32

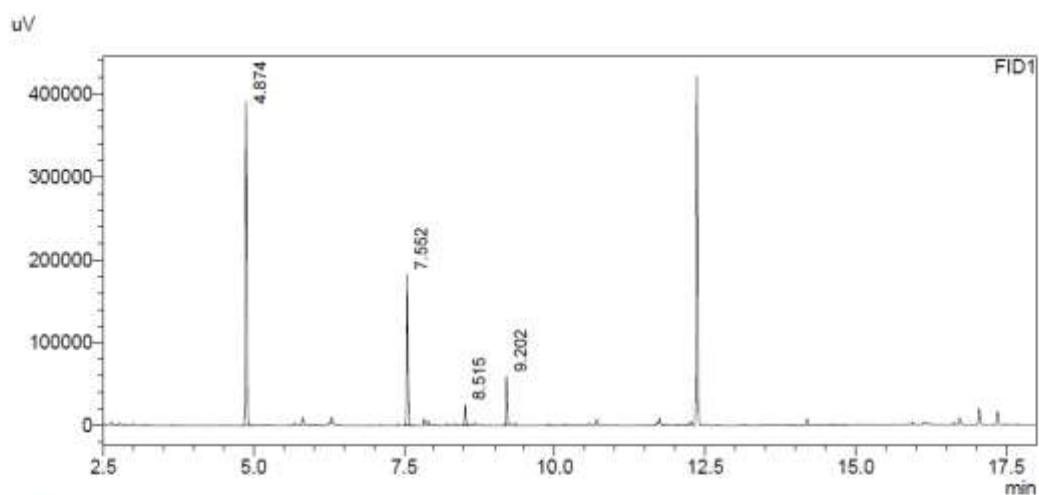

FID1

| Peak# | Ret. Time | Area    | Area%   |
|-------|-----------|---------|---------|
| 1     | 4.874     | 619061  | 61.689  |
| 2     | 7.552     | 263535  | 26.261  |
| 3     | 8.515     | 38077   | 3.794   |
| 4     | 9.202     | 82854   | 8.256   |
| Total |           | 1003527 | 100.000 |

Sample Name : t=72\_SOD-1019  
 Sample ID :  
 Data Filename : t=72\_SOD-1019.gcd  
 Method Filename : Methode\_Achiral\_MUC\_Integration.gcm  
 Batch Filename : achiralGC.gcb  
 Vial # : 2  
 Injection Volume : 5 uL  
 Date Acquired : 26.02.2020 18:02:23  
 Date Processed : 26.02.2020 18:23:09

uV

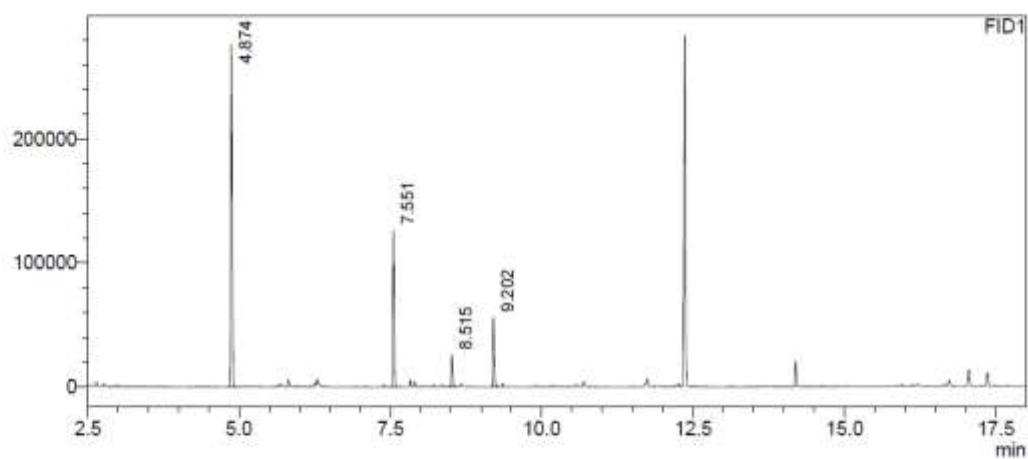

FID1

| Peak# | Ret. Time | Area   | Area%   |
|-------|-----------|--------|---------|
| 1     | 4.874     | 434826 | 58.691  |
| 2     | 7.551     | 184214 | 24.865  |
| 3     | 8.515     | 38555  | 5.204   |
| 4     | 9.202     | 83275  | 11.240  |
| Total |           | 740871 | 100.000 |

Sample Name : t=72\_SOD-1020  
 Sample ID :  
 Data Filename : t=72\_SOD-1020.gcd  
 Method Filename : Methode\_Achiral\_MUC\_Integration.gcm  
 Batch Filename : achiralGC.gcb  
 Vial # : 3  
 Injection Volume : 5 uL  
 Date Acquired : 26.02.2020 18:27:46  
 Date Processed : 26.02.2020 18:48:31

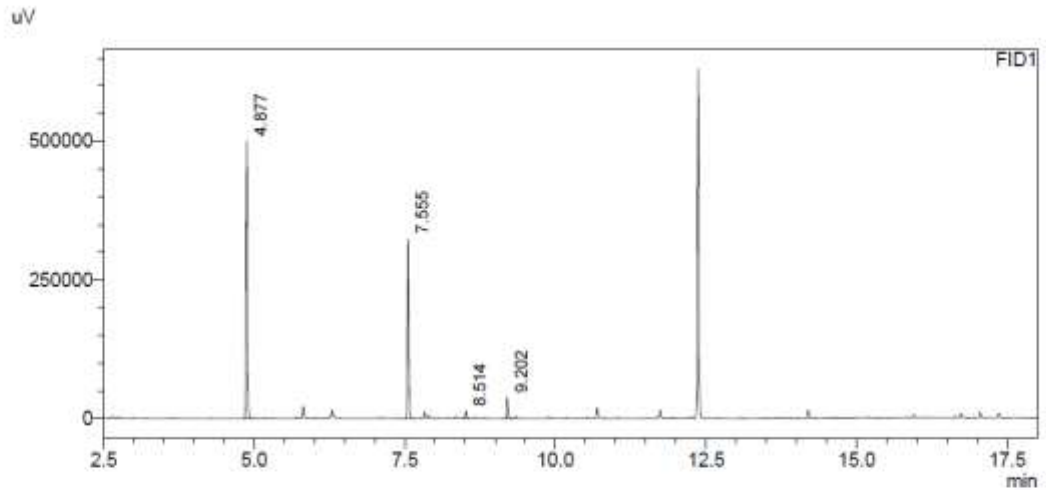

FID1

| Peak# | Ret. Time | Area    | Area%   |
|-------|-----------|---------|---------|
| 1     | 4.877     | 805306  | 59.037  |
| 2     | 7.555     | 480061  | 35.193  |
| 3     | 8.514     | 20078   | 1.472   |
| 4     | 9.202     | 58629   | 4.298   |
| Total |           | 1364076 | 100.000 |

## Entry 2

I, *i*PrOH

t = 0 min

Sample Name : t=0\_SOD\_781  
Sample ID :  
Data Filename : t=0\_SOD\_781.gcd  
Method Filename : Methode\_Achiral\_MUC\_Integration.gcm  
Batch Filename : batch.gcb  
Vial # : 2  
Injection Volume : 5 uL  
Date Acquired : 02.07.2019 15:40:52  
Date Processed : 02.07.2019 16:01:35

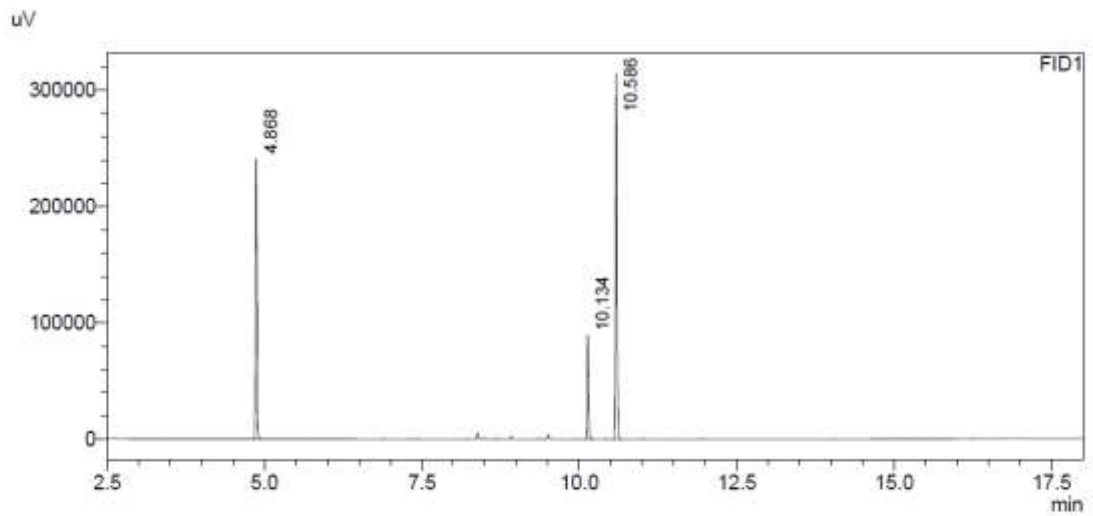

| Peak# | Ret. Time | Area   | Area%   |
|-------|-----------|--------|---------|
| 1     | 4.868     | 381079 | 39.013  |
| 2     | 10.134    | 128674 | 13.173  |
| 3     | 10.586    | 467050 | 47.814  |
| Total |           | 976802 | 100.000 |



Sample Name : SOD-783\_0  
Sample ID :  
Data Filename : SOD-783\_0.gcd  
Method Filename : Methode\_Achiral\_MUC\_Integration.gcm  
Batch Filename : achiralGC.gcb  
Vial # : 19  
Injection Volume : 5 uL  
Date Acquired : 06.03.2020 07:45:58  
Date Processed : 06.03.2020 08:06:42

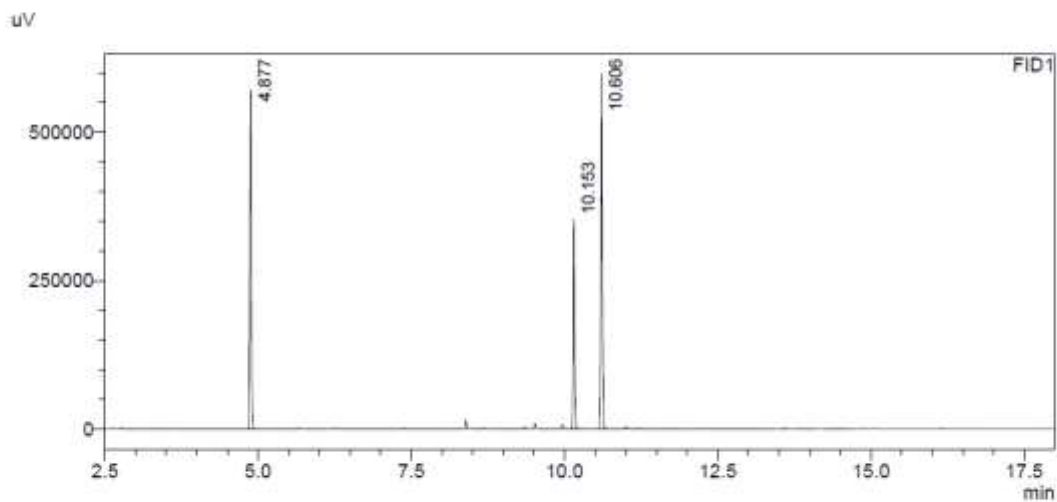

FID1

| Peak# | Ret. Time | Area    | Area%   |
|-------|-----------|---------|---------|
| 1     | 4.877     | 900662  | 37.792  |
| 2     | 10.153    | 531965  | 22.322  |
| 3     | 10.606    | 950552  | 39.886  |
| Total |           | 2383179 | 100.000 |

Sample Name : t=0\_SOD\_785  
Sample ID :  
Data Filename : t=0\_SOD\_785.gcd  
Method Filename : Methode\_Achiral\_MUC\_Integration.gcm  
Batch Filename : batch.gcb  
Vial # : 4  
Injection Volume : 5 uL  
Date Acquired : 02.07.2019 16:31:51  
Date Processed : 02.07.2019 16:52:34

uV

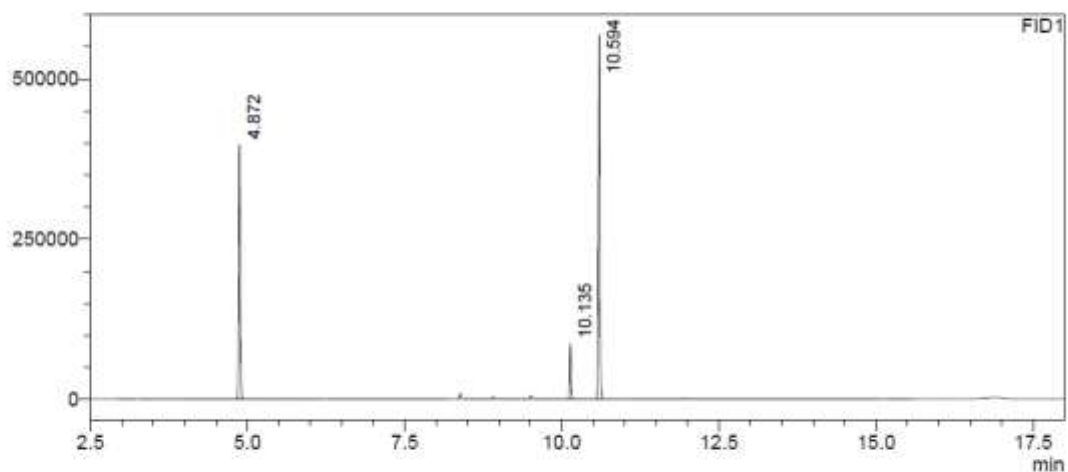

FID1

| Peak# | Ret. Time | Area    | Area%   |
|-------|-----------|---------|---------|
| 1     | 4.872     | 625469  | 38.097  |
| 2     | 10.135    | 128293  | 7.814   |
| 3     | 10.594    | 888004  | 54.088  |
| Total |           | 1641766 | 100.000 |

t = 24 h

Sample Name : t=24\_SOD\_781  
Sample ID :  
Data Filename : t=24\_SOD\_781.gcd  
Method Filename : Methode\_Achiral\_MUC\_Integration.gcm  
Batch Filename : batch.gcb  
Vial # : 2  
Injection Volume : 5 uL  
Date Acquired : 22.07.2019 14:08:20  
Date Processed : 22.07.2019 14:29:03

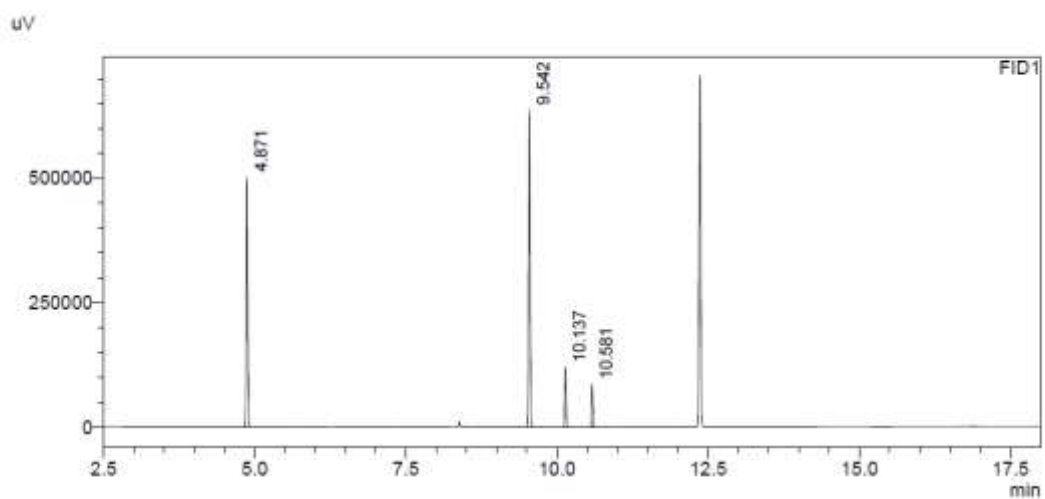

FID1

| Peak# | Ret. Time | Area    | Area%   |
|-------|-----------|---------|---------|
| 1     | 4.871     | 802637  | 38.189  |
| 2     | 9.542     | 998852  | 47.524  |
| 3     | 10.137    | 173970  | 8.277   |
| 4     | 10.581    | 126306  | 6.010   |
| Total |           | 2101764 | 100.000 |

Sample Name : SOD-783\_24  
Sample ID :  
Data Filename : SOD-783\_24.gcd  
Method Filename : Methode\_Achiral\_MUC\_Integration.gcm  
Batch Filename : achiralGC.gcb  
Vial # : 4  
Injection Volume : 5 uL  
Date Acquired : 07.03.2020 12:29:36  
Date Processed : 07.03.2020 12:50:20

uV

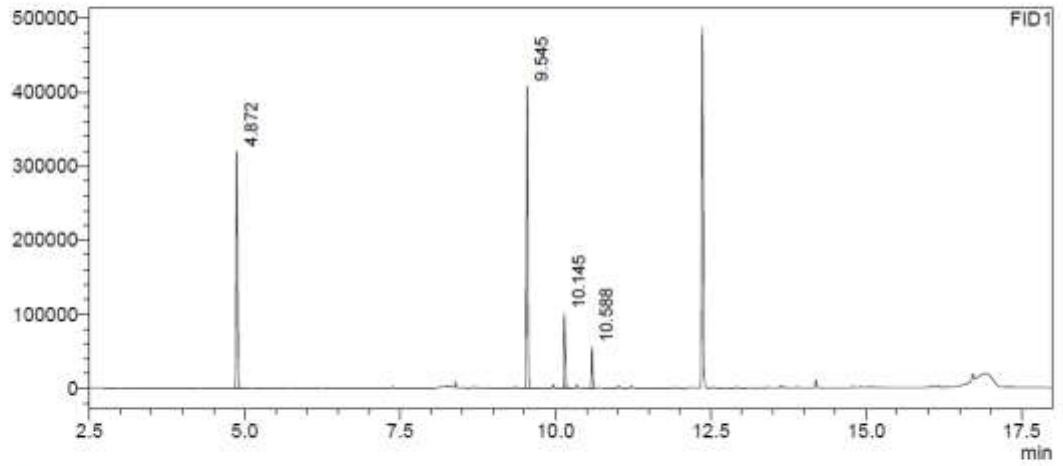

| Peak# | Ret. Time | Area    | Area%   |
|-------|-----------|---------|---------|
| 1     | 4.872     | 498477  | 37.421  |
| 2     | 9.545     | 606440  | 45.526  |
| 3     | 10.145    | 146520  | 10.999  |
| 4     | 10.588    | 80646   | 6.054   |
| Total |           | 1332083 | 100.000 |

Sample Name : t=24\_SOD\_785  
Sample ID :  
Data Filename : t=24\_SOD\_785.gcd  
Method Filename : Methode\_Achiral\_MUC\_Integration.gcm  
Batch Filename : batch.gcb  
Vial # : 4  
Injection Volume : 5 uL  
Date Acquired : 22.07.2019 14:59:11  
Date Processed : 22.07.2019 15:19:55

uV

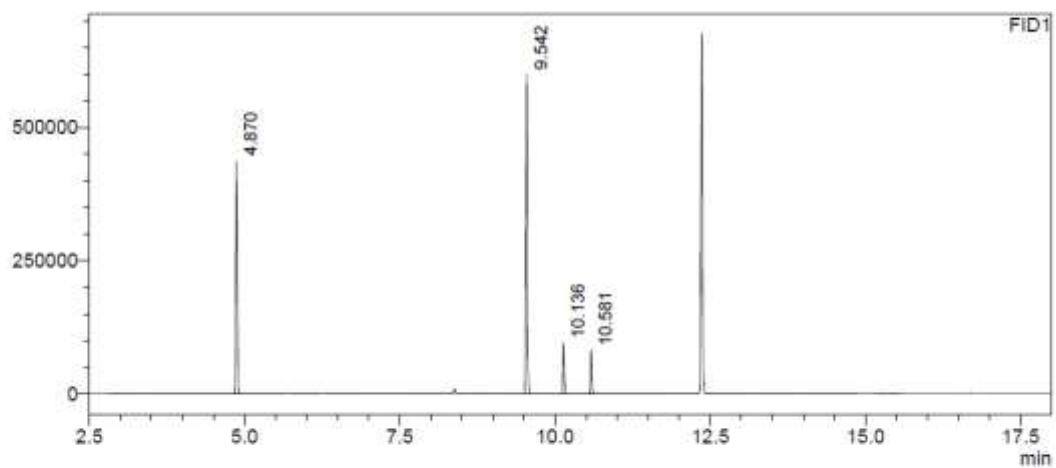

| Peak# | Ret. Time | Area    | Area%   |
|-------|-----------|---------|---------|
| 1     | 4.870     | 686427  | 36.555  |
| 2     | 9.542     | 935078  | 49.796  |
| 3     | 10.136    | 139674  | 7.438   |
| 4     | 10.581    | 116621  | 6.211   |
| Total |           | 1877801 | 100.000 |

t = 48 h

Sample Name : t=48\_SOD\_781  
Sample ID :  
Data Filename : t=48\_SOD\_781.gcd  
Method Filename : Methode\_Achiral\_MUC\_Integration.gcm  
Batch Filename : batch.gcb  
Vial # : 6  
Injection Volume : 5 uL  
Date Acquired : 22.07.2019 15:50:03  
Date Processed : 22.07.2019 16:10:47

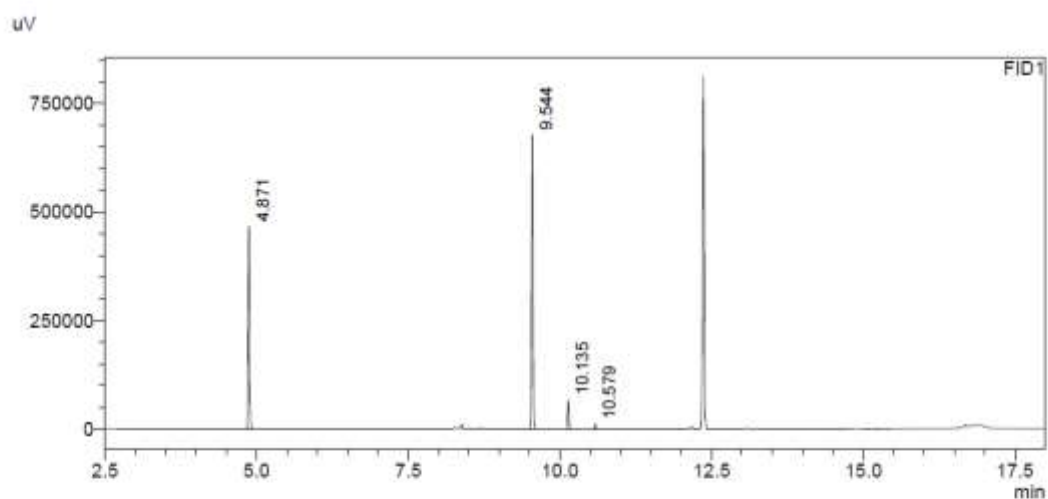

| Peak# | Ret. Time | Area    | Area%   |
|-------|-----------|---------|---------|
| 1     | 4.871     | 734118  | 38.159  |
| 2     | 9.544     | 1073410 | 55.795  |
| 3     | 10.135    | 98525   | 5.121   |
| 4     | 10.579    | 17800   | 0.925   |
| Total |           | 1923853 | 100.000 |

Sample Name : SOD-783\_48  
Sample ID :  
Data Filename : SOD-783\_48.gcd  
Method Filename : Methode\_Achiral\_MUC\_Integration.gcm  
Batch Filename : achiralGC.gcb  
Vial # : 5  
Injection Volume : 5 uL  
Date Acquired : 07.03.2020 12:54:57  
Date Processed : 07.03.2020 13:15:40

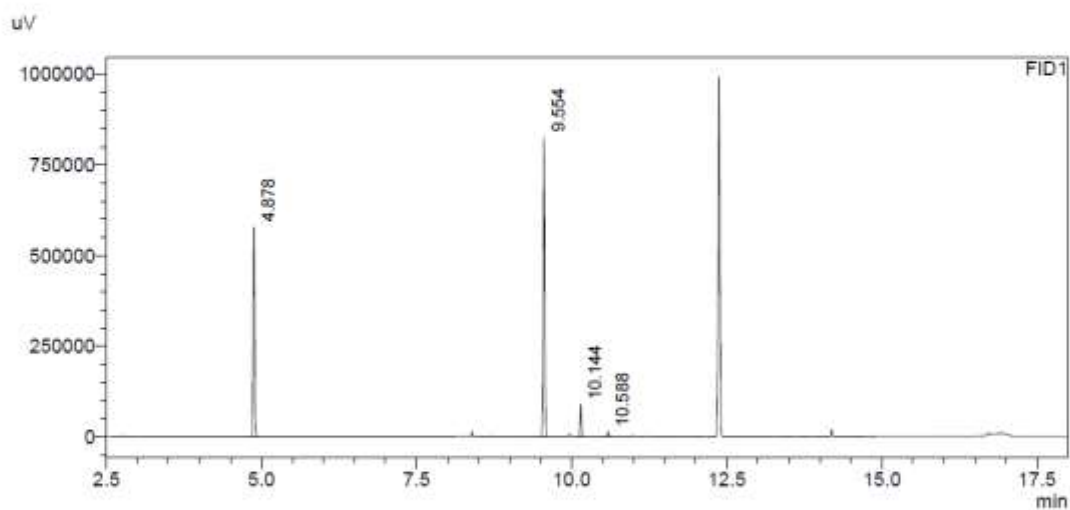

FID1

| Peak# | Ret. Time | Area    | Area%   |
|-------|-----------|---------|---------|
| 1     | 4.878     | 929436  | 37.783  |
| 2     | 9.554     | 1378155 | 56.025  |
| 3     | 10.144    | 130878  | 5.320   |
| 4     | 10.588    | 21439   | 0.872   |
| Total |           | 2459908 | 100.000 |

Sample Name : t=48\_SOD\_785  
 Sample ID :  
 Data Filename : t=48\_SOD\_785.gcd  
 Method Filename : Methode\_Achiral\_MUC\_Integration.gcm  
 Batch Filename : batch.gcb  
 Vial # : 8  
 Injection Volume : 5 uL  
 Date Acquired : 22.07.2019 16:40:53  
 Date Processed : 22.07.2019 17:01:37

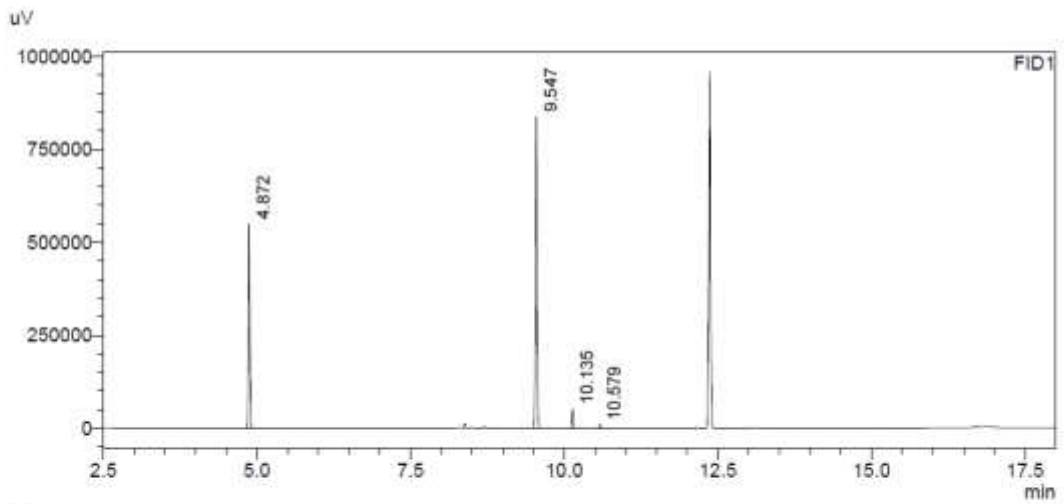

FID1

| Peak# | Ret. Time | Area    | Area%   |
|-------|-----------|---------|---------|
| 1     | 4.872     | 871888  | 36.681  |
| 2     | 9.547     | 1414179 | 59.495  |
| 3     | 10.135    | 75962   | 3.196   |
| 4     | 10.579    | 14945   | 0.629   |
| Total |           | 2376973 | 100.000 |



t = 72 h

Sample Name : t=72\_SOD\_781  
Sample ID :  
Data Filename : t=72\_SOD\_781.gcd  
Method Filename : Methode\_Achiral\_MUC\_Integration.gcm  
Batch Filename : batch.gcb  
Vial # : 10  
Injection Volume : 5 uL  
Date Acquired : 22.07.2019 17:31:47  
Date Processed : 22.07.2019 17:52:31

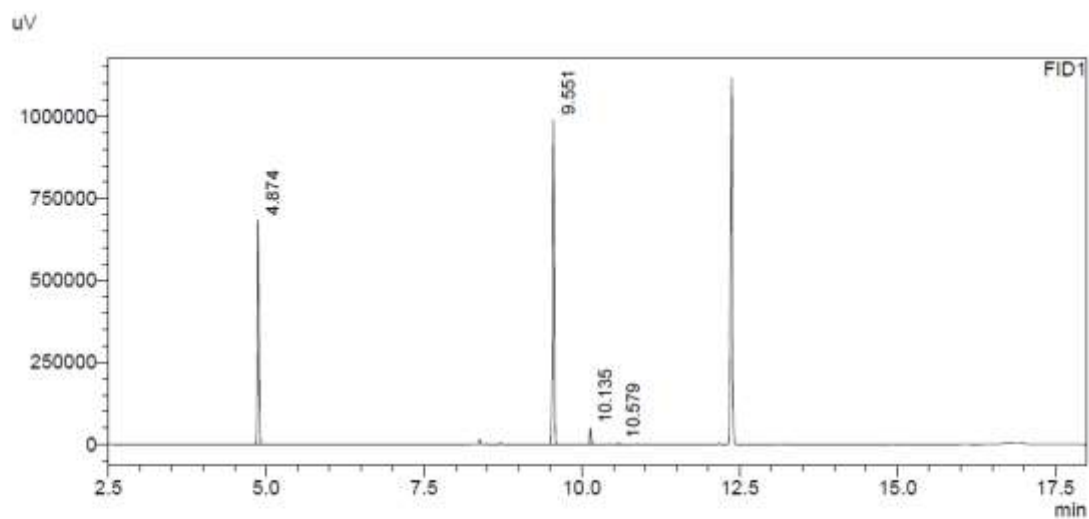

| Peak# | Ret. Time | Area    | Area%   |
|-------|-----------|---------|---------|
| 1     | 4.874     | 1089738 | 37.544  |
| 2     | 9.551     | 1733138 | 59.711  |
| 3     | 10.135    | 71729   | 2.471   |
| 4     | 10.579    | 7931    | 0.273   |
| Total |           | 2902536 | 100.000 |

Sample Name : SOD-783\_72  
 Sample ID :  
 Data Filename : SOD-783\_72.gcd  
 Method Filename : Methode\_Achiral\_MUC\_Integration.gcm  
 Batch Filename : achiralGC.gcb  
 Vial # : 6  
 Injection Volume : 5 uL  
 Date Acquired : 07.03.2020 13:20:20  
 Date Processed : 07.03.2020 13:41:05

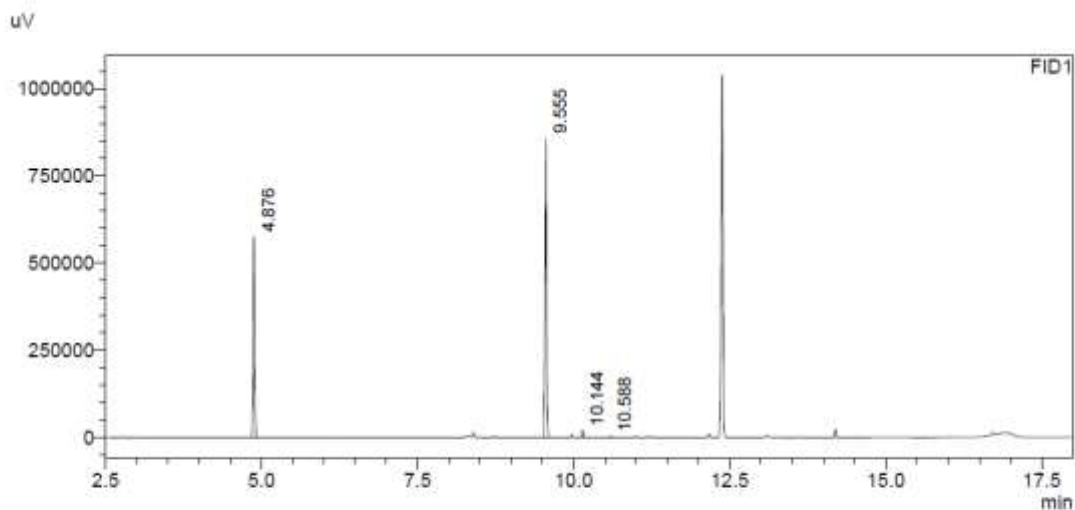

FID1

| Peak# | Ret. Time | Area    | Area%   |
|-------|-----------|---------|---------|
| 1     | 4.876     | 910544  | 38.782  |
| 2     | 9.555     | 1401711 | 59.702  |
| 3     | 10.144    | 29767   | 1.268   |
| 4     | 10.588    | 5804    | 0.247   |
| Total |           | 2347826 | 100.000 |

Sample Name : t=72\_SOD\_785  
 Sample ID :  
 Data Filename : t=72\_SOD\_785.gcd  
 Method Filename : Methode\_Achiral\_MUC\_Integration.gcm  
 Batch Filename : batch.gcb  
 Vial # : 12  
 Injection Volume : 5 uL  
 Date Acquired : 22.07.2019 18:22:43  
 Date Processed : 22.07.2019 18:43:28

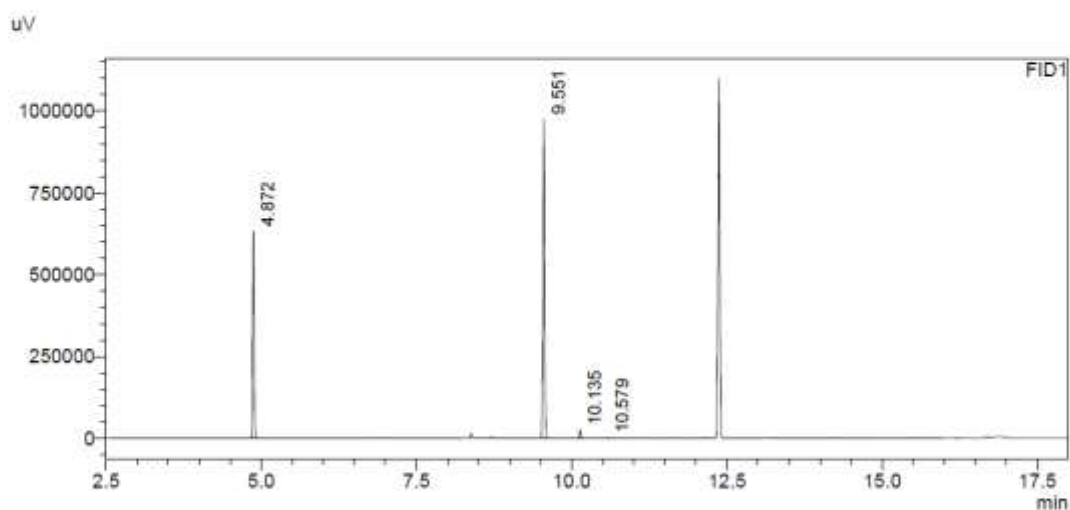

FID1

| Peak# | Ret. Time | Area    | Area%   |
|-------|-----------|---------|---------|
| 1     | 4.872     | 999537  | 36.583  |
| 2     | 9.551     | 1688589 | 61.803  |
| 3     | 10.135    | 39760   | 1.455   |
| 4     | 10.579    | 4330    | 0.158   |
| Total |           | 2732216 | 100.000 |

I, no *i*PrOH

t = 0 min

Sample Name : t=0\_SOD\_780  
Sample ID :  
Data Filename : t=0\_SOD\_780.gcd  
Method Filename : Methode\_Achiral\_MUC\_Integration.gcm  
Batch Filename : batch.gcb  
Vial # : 1  
Injection Volume : 5 uL  
Date Acquired : 02.07.2019 15:15:28  
Date Processed : 02.07.2019 15:36:11

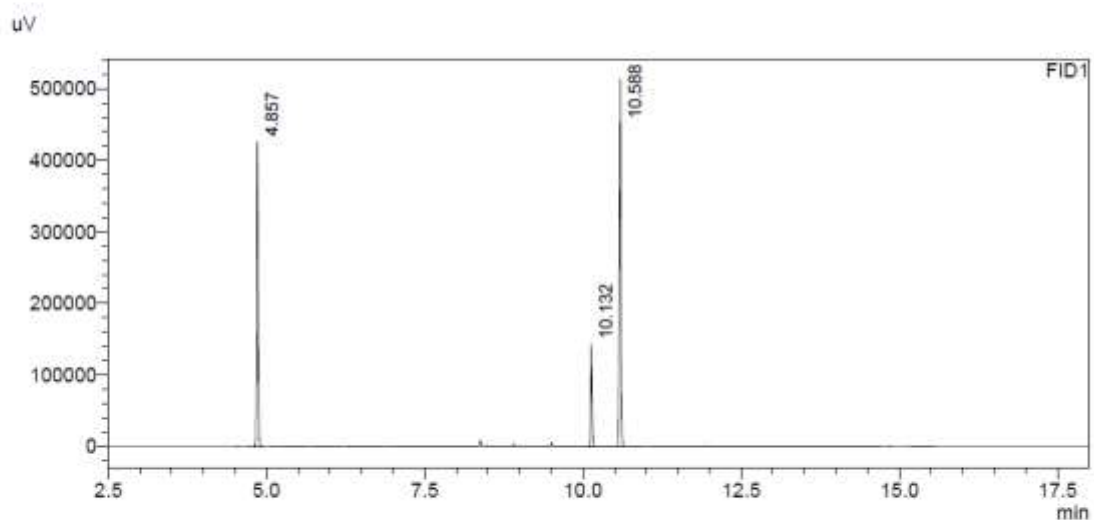

| Peak# | Ret. Time | Area    | Area%   |
|-------|-----------|---------|---------|
| 1     | 4.857     | 682619  | 40.081  |
| 2     | 10.132    | 202135  | 11.869  |
| 3     | 10.588    | 818333  | 48.050  |
| Total |           | 1703087 | 100.000 |

Sample Name : SOD\_782\_t=0  
Sample ID :  
Data Filename : SOD\_782\_t=0.gcd  
Method Filename : Methode\_Achiral\_MUC\_Integration.gcm  
Batch Filename : batch.gcb  
Vial # : 13  
Injection Volume : 5 uL  
Date Acquired : 22.07.2019 18:48:10  
Date Processed : 22.07.2019 19:08:54

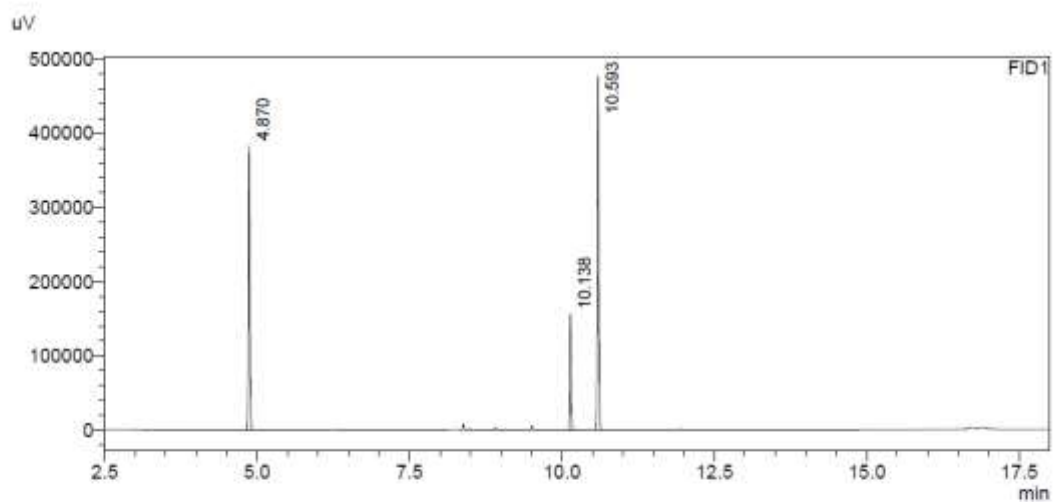

FID1

| Peak# | Ret. Time | Area    | Area%   |
|-------|-----------|---------|---------|
| 1     | 4.870     | 610733  | 38.768  |
| 2     | 10.138    | 225919  | 14.341  |
| 3     | 10.593    | 738713  | 46.892  |
| Total |           | 1575366 | 100.000 |

Sample Name : t=0\_SOD\_784  
Sample ID :  
Data Filename : t=0\_SOD\_784.gcd  
Method Filename : Methode\_Achiral\_MUC\_Integration.gcm  
Batch Filename : batch.gcb  
Vial # : 3  
Injection Volume : 5 uL  
Date Acquired : 02.07.2019 16:06:23  
Date Processed : 02.07.2019 16:27:06

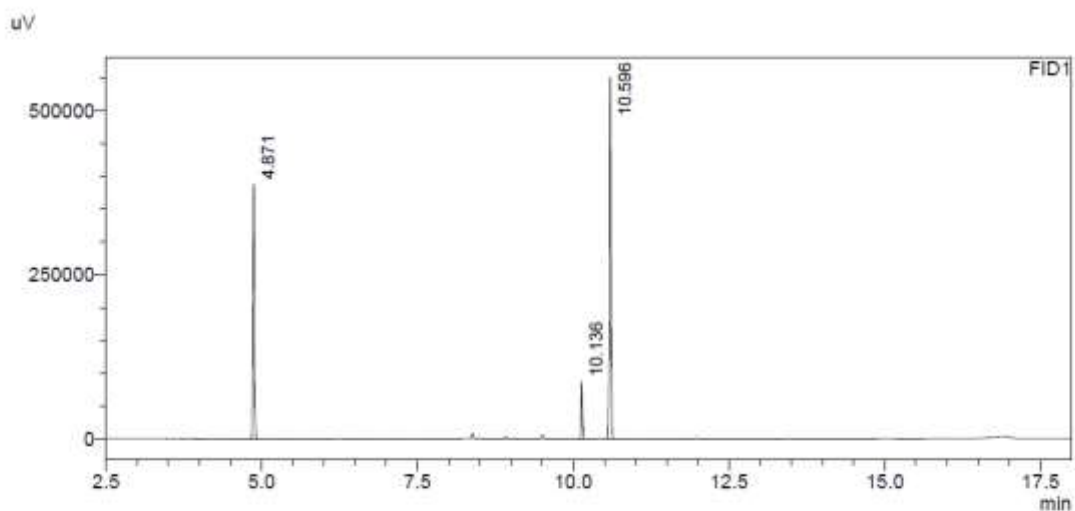

| Peak# | Ret. Time | Area    | Area%   |
|-------|-----------|---------|---------|
| 1     | 4.871     | 614791  | 38.015  |
| 2     | 10.136    | 125503  | 7.760   |
| 3     | 10.596    | 876918  | 54.224  |
| Total |           | 1617212 | 100.000 |

t = 24 h

Sample Name : t=24\_SOD\_780  
Sample ID :  
Data Filename : t=24\_SOD\_780.gcd  
Method Filename : Methode\_Achiral\_MUC\_Integration.gcm  
Batch Filename : batch.gcb  
Vial # : 1  
Injection Volume : 5 uL  
Date Acquired : 22.07.2019 13:42:57  
Date Processed : 22.07.2019 14:03:42

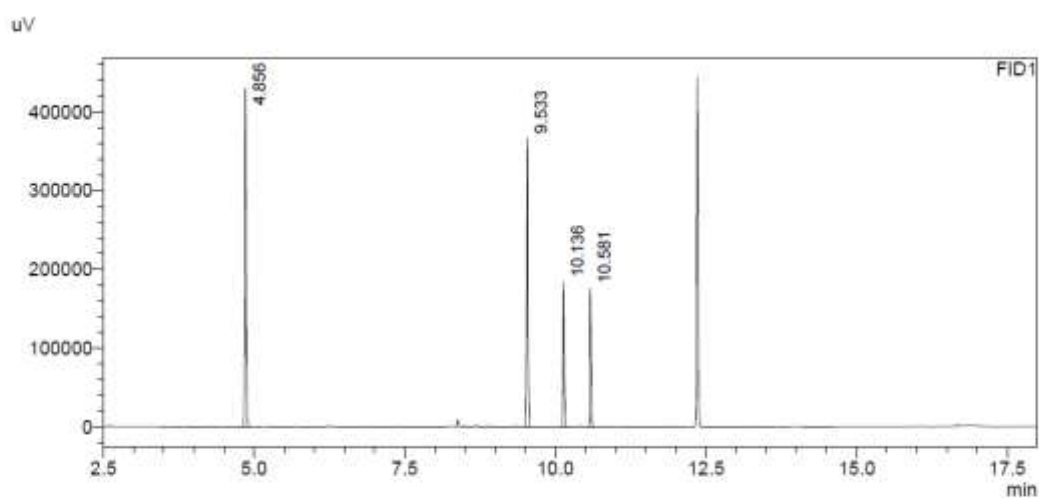

| Peak# | Ret. Time | Area    | Area%   |
|-------|-----------|---------|---------|
| 1     | 4.856     | 671557  | 38.721  |
| 2     | 9.533     | 547252  | 31.553  |
| 3     | 10.136    | 264067  | 15.226  |
| 4     | 10.581    | 251495  | 14.501  |
| Total |           | 1734371 | 100.000 |

Sample Name : SOD\_782\_t=24  
 Sample ID :  
 Data Filename : SOD\_782\_t=24.gcd  
 Method Filename : Methode\_Achiral\_MUC\_Integration.gcm  
 Batch Filename : batch.gcb  
 Vial # : 31  
 Injection Volume : 5 uL  
 Date Acquired : 23.07.2019 02:25:28  
 Date Processed : 23.07.2019 02:46:11

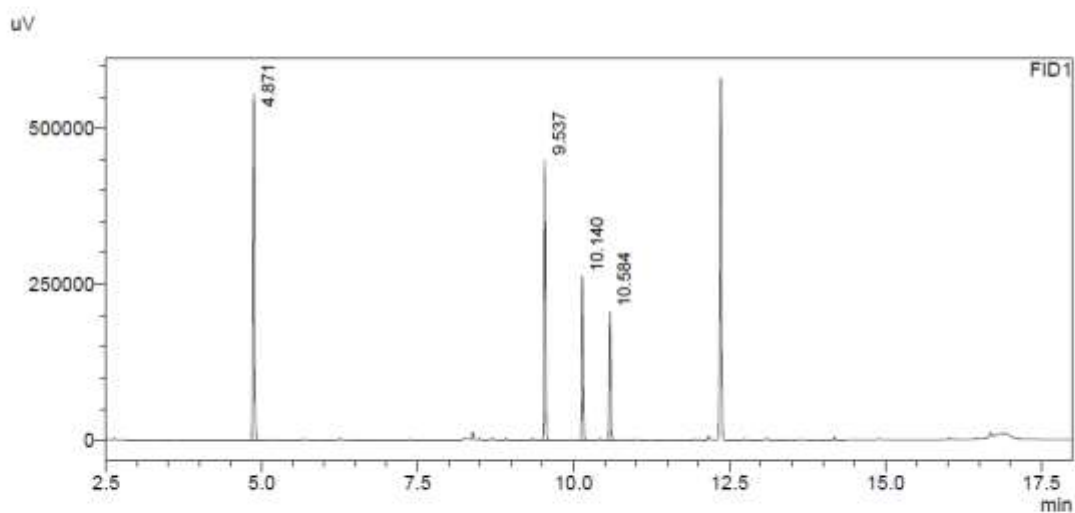

FID1

| Peak# | Ret. Time | Area    | Area%   |
|-------|-----------|---------|---------|
| 1     | 4.871     | 881932  | 39.227  |
| 2     | 9.537     | 678793  | 30.191  |
| 3     | 10.140    | 388395  | 17.275  |
| 4     | 10.584    | 299183  | 13.307  |
| Total |           | 2248303 | 100.000 |



Sample Name : t=24\_SOD\_784  
Sample ID :  
Data Filename : t=24\_SOD\_784.gcd  
Method Filename : Methode\_Achiral\_MUC\_Integration.gcm  
Batch Filename : batch.gcb  
Vial # : 3  
Injection Volume : 5 uL  
Date Acquired : 22.07.2019 14:33:46  
Date Processed : 22.07.2019 14:54:29

uv

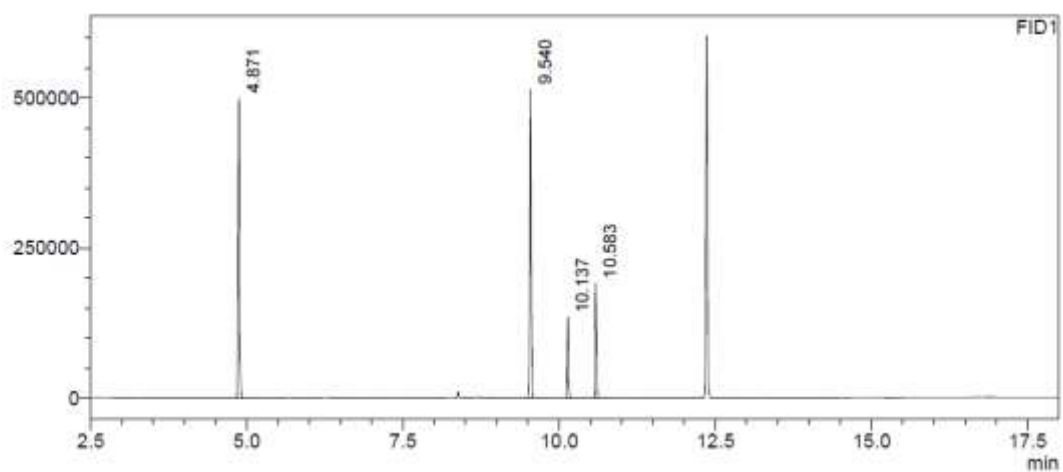

FID1

| Peak# | Ret. Time | Area    | Area%   |
|-------|-----------|---------|---------|
| 1     | 4.871     | 797567  | 38.537  |
| 2     | 9.540     | 801046  | 38.705  |
| 3     | 10.137    | 198233  | 9.578   |
| 4     | 10.583    | 272748  | 13.179  |
| Total |           | 2069593 | 100.000 |

t = 48 h

Sample Name : t=48\_SOD\_780  
Sample ID :  
Data Filename : t=48\_SOD\_780.gcd  
Method Filename : Methode\_Achiral\_MUC\_Integration.gcm  
Batch Filename : batch.gcb  
Vial # : 5  
Injection Volume : 5 uL  
Date Acquired : 22.07.2019 15:24:35  
Date Processed : 22.07.2019 15:45:18

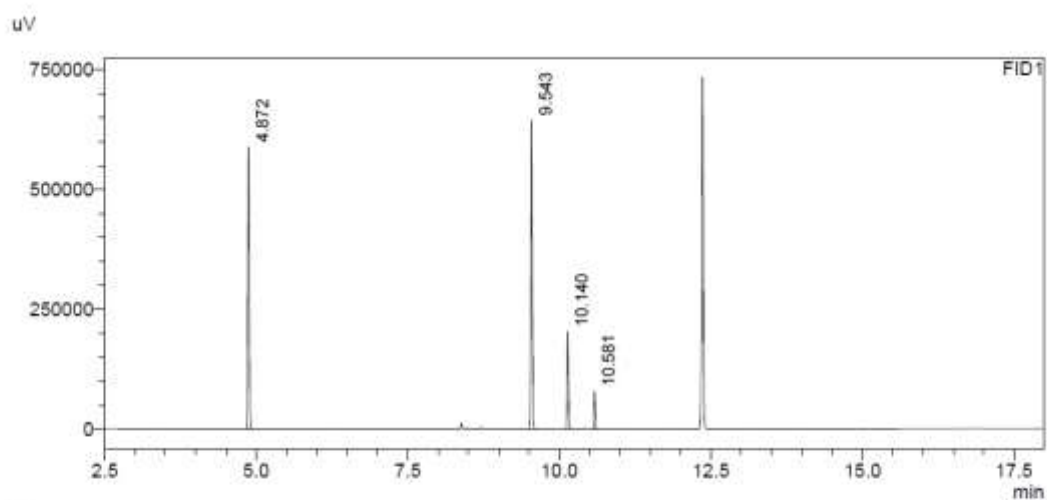

| Peak# | Ret. Time | Area    | Area%   |
|-------|-----------|---------|---------|
| 1     | 4.872     | 942486  | 39.670  |
| 2     | 9.543     | 1020354 | 42.948  |
| 3     | 10.140    | 300804  | 12.661  |
| 4     | 10.581    | 112170  | 4.721   |
| Total |           | 2375814 | 100.000 |

Sample Name : SOD\_782\_t=48  
Sample ID :  
Data Filename : SOD\_782\_t=48.gcd  
Method Filename : Methode\_Achiral\_MUC\_Integration.gcm  
Batch Filename : batch.gcd  
Vial # : 32  
Injection Volume : 5 uL  
Date Acquired : 23.07.2019 02:50:50  
Date Processed : 23.07.2019 03:11:34

uV

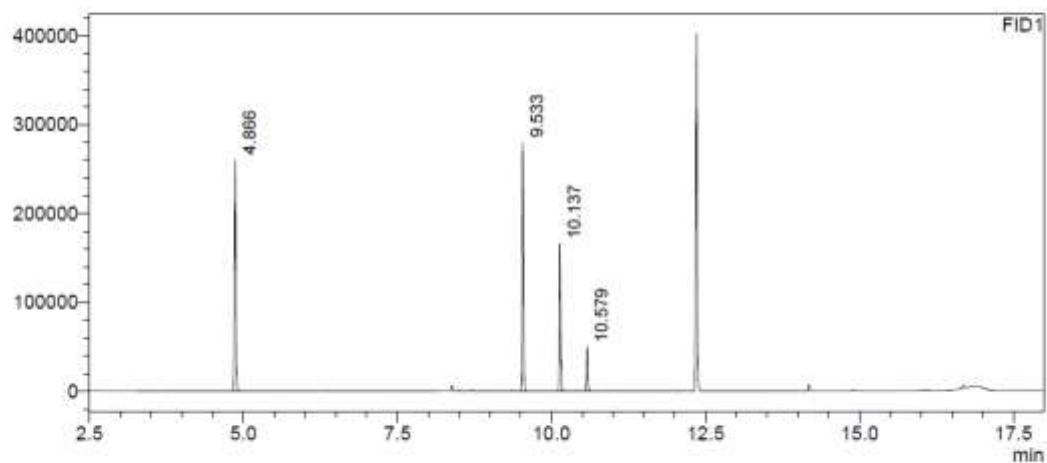

FID1

| Peak# | Ret. Time | Area    | Area%   |
|-------|-----------|---------|---------|
| 1     | 4.866     | 404145  | 35.841  |
| 2     | 9.533     | 407572  | 36.145  |
| 3     | 10.137    | 244549  | 21.687  |
| 4     | 10.579    | 71343   | 6.327   |
| Total |           | 1127610 | 100.000 |

Sample Name : t=48\_SOD\_784  
 Sample ID :  
 Data Filename : t=48\_SOD\_784.gcd  
 Method Filename : Methode\_Achiral\_MUC\_Integration.gcm  
 Batch Filename : batch.gcb  
 Vial # : 7  
 Injection Volume : 5 uL  
 Date Acquired : 22.07.2019 16:15:28  
 Date Processed : 22.07.2019 16:36:12

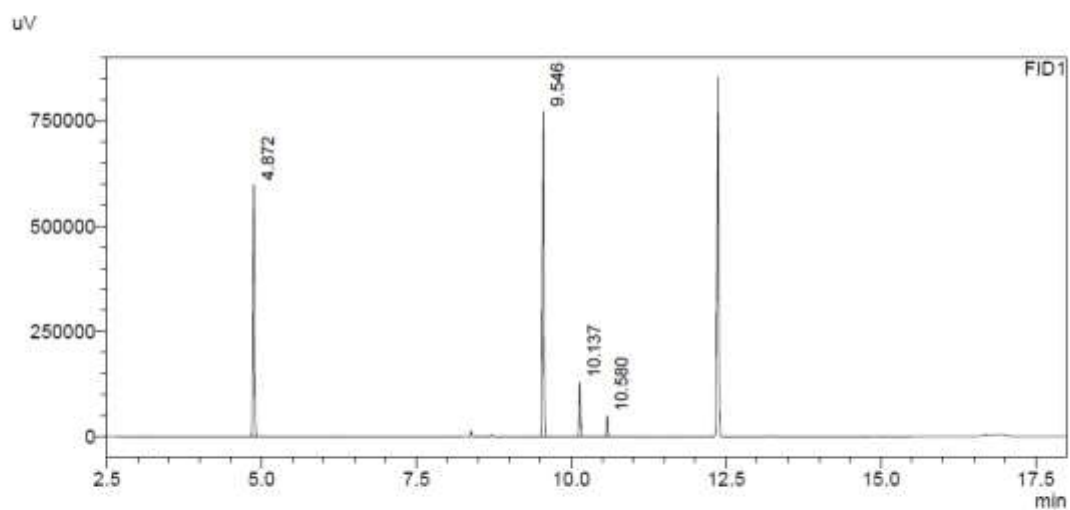

FID1

| Peak# | Ret. Time | Area    | Area%   |
|-------|-----------|---------|---------|
| 1     | 4.872     | 950801  | 38.598  |
| 2     | 9.546     | 1254610 | 50.931  |
| 3     | 10.137    | 187508  | 7.612   |
| 4     | 10.580    | 70446   | 2.860   |
| Total |           | 2463365 | 100.000 |

t = 72 h

Sample Name : t=72\_SOD\_780  
Sample ID :  
Data Filename : t=72\_SOD\_780.gcd  
Method Filename : Methode\_Achiral\_MUC\_Integration.gcm  
Batch Filename : batch.gcb  
Vial # : 9  
Injection Volume : 5 uL  
Date Acquired : 22.07.2019 17:06:19  
Date Processed : 22.07.2019 17:27:03

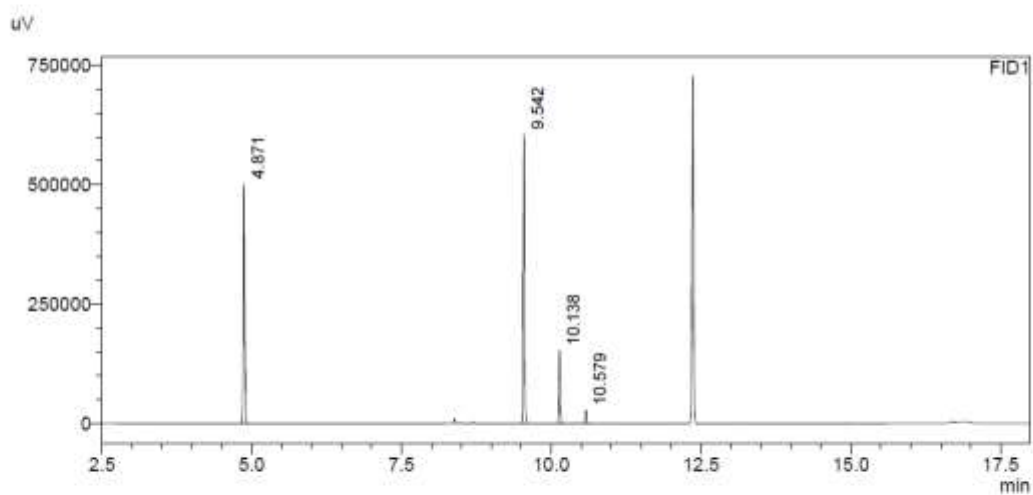

| Peak# | Ret. Time | Area    | Area%   |
|-------|-----------|---------|---------|
| 1     | 4.871     | 785158  | 39.317  |
| 2     | 9.542     | 952097  | 47.677  |
| 3     | 10.138    | 218593  | 10.946  |
| 4     | 10.579    | 41130   | 2.060   |
| Total |           | 1996978 | 100.000 |

Sample Name : SOD\_782\_t=72  
Sample ID :  
Data Filename : SOD\_782\_t=72.gcd  
Method Filename : Methode\_Achiral\_MUC\_Integration.gcm  
Batch Filename : batch.gcb  
Vial # : 33  
Injection Volume : 5 uL  
Date Acquired : 23.07.2019 03:16:14  
Date Processed : 23.07.2019 03:36:57

uV

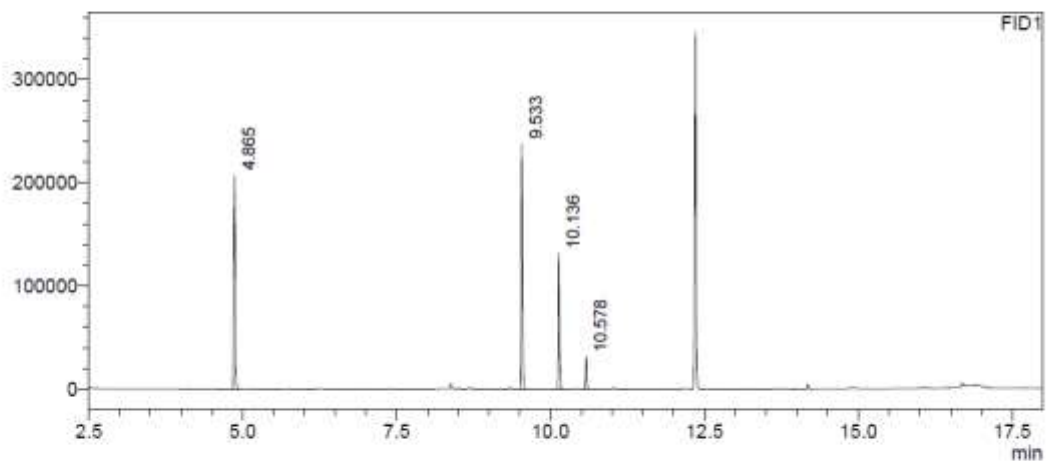

FID1

| Peak# | Ret. Time | Area   | Area%   |
|-------|-----------|--------|---------|
| 1     | 4.865     | 325500 | 35.998  |
| 2     | 9.533     | 345776 | 38.240  |
| 3     | 10.136    | 187790 | 20.768  |
| 4     | 10.578    | 45161  | 4.994   |
| Total |           | 904226 | 100.000 |

Sample Name : t=72\_SOD\_784  
Sample ID :  
Data Filename : t=72\_SOD\_784.gcd  
Method Filename : Methode\_Achiral\_MUC\_Integration.gcm  
Batch Filename : batch.gcd  
Vial # : 11  
Injection Volume : 5 uL  
Date Acquired : 22.07.2019 17:57:14  
Date Processed : 22.07.2019 18:17:58

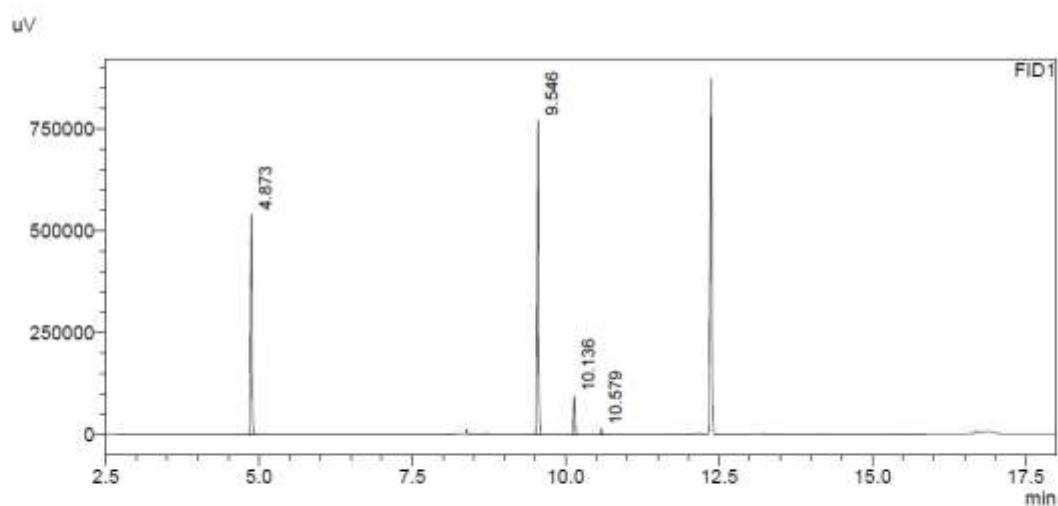

| Peak# | Ret. Time | Area    | Area%   |
|-------|-----------|---------|---------|
| 1     | 4.873     | 867489  | 38.030  |
| 2     | 9.546     | 1256994 | 55.105  |
| 3     | 10.136    | 136161  | 5.969   |
| 4     | 10.579    | 20434   | 0.896   |
| Total |           | 2281079 | 100.000 |

No I, *i*PrOH

t = 0 min

Sample Name : t=0\_SOD-1027  
Sample ID :  
Data Filename : t=0\_SOD-1027.gcd  
Method Filename : Methode\_Achiral\_MUC\_Integration.gcm  
Batch Filename : achiralGC.gcb  
Vial # : 43  
Injection Volume : 5 uL  
Date Acquired : 20.02.2020 10:54:28  
Date Processed : 20.02.2020 11:15:12

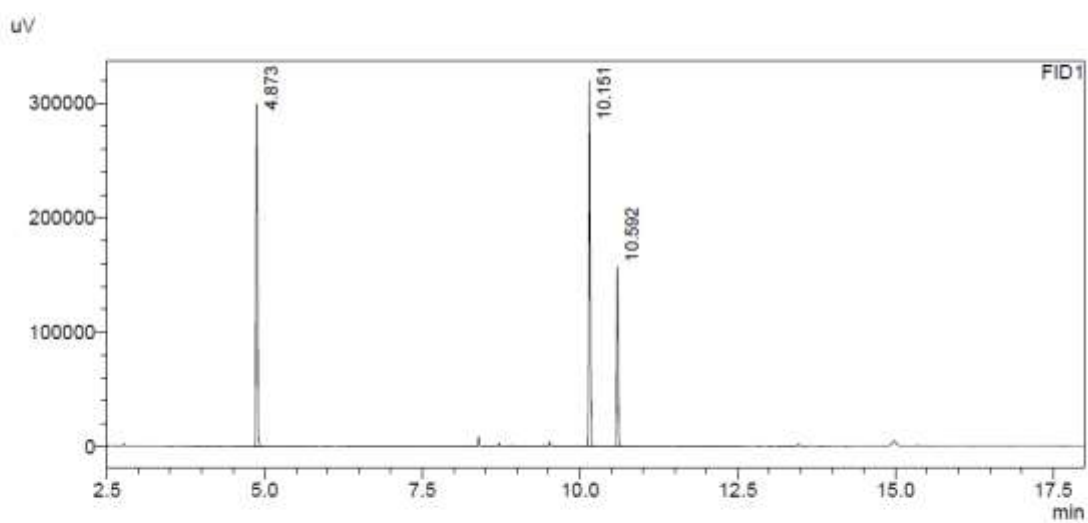

FID1

| Peak# | Ret. Time | Area    | Area%   |
|-------|-----------|---------|---------|
| 1     | 4.873     | 463546  | 39.832  |
| 2     | 10.151    | 471263  | 40.495  |
| 3     | 10.592    | 228951  | 19.673  |
| Total |           | 1163760 | 100.000 |



Sample Name : t=0\_SOD-1028  
Sample ID :  
Data Filename : t=0\_SOD-1028.gcd  
Method Filename : Methode\_Achiral\_MUC\_Integration.gcm  
Batch Filename : achiralGC.gcb  
Vial # : 44  
Injection Volume : 5 uL  
Date Acquired : 20.02.2020 11:19:54  
Date Processed : 20.02.2020 11:40:39

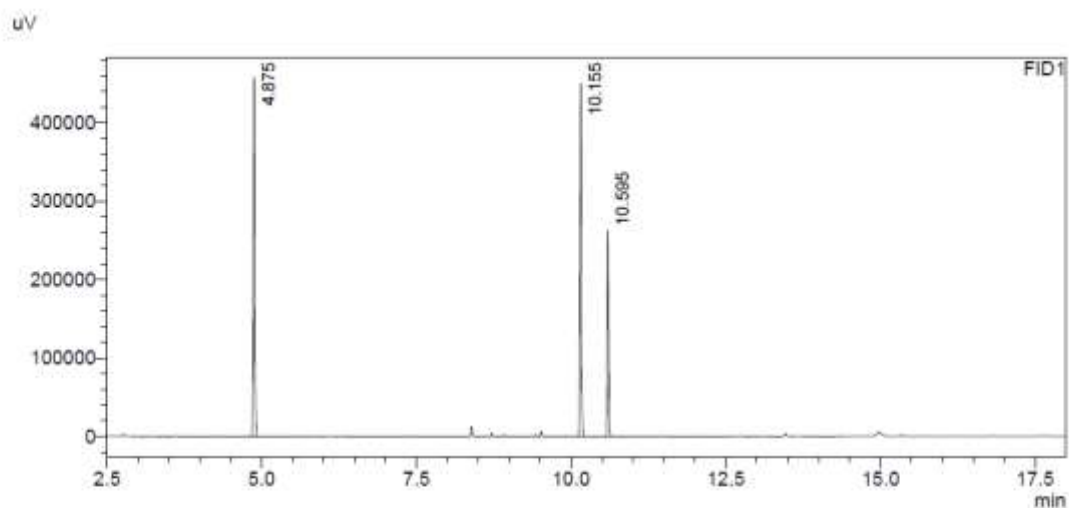

FID1

| Peak# | Ret. Time | Area    | Area%   |
|-------|-----------|---------|---------|
| 1     | 4.875     | 727347  | 40.546  |
| 2     | 10.155    | 690320  | 38.482  |
| 3     | 10.595    | 376230  | 20.973  |
| Total |           | 1793897 | 100.000 |

Sample Name : t=0\_SOD-1029  
 Sample ID :  
 Data Filename : t=0\_SOD-1029.gcd  
 Method Filename : Methode\_Achiral\_MUC\_Integration.gcm  
 Batch Filename : achiralGC.gcb  
 Vial # : 45  
 Injection Volume : 5 uL  
 Date Acquired : 20.02.2020 11:45:12  
 Date Processed : 20.02.2020 12:05:55

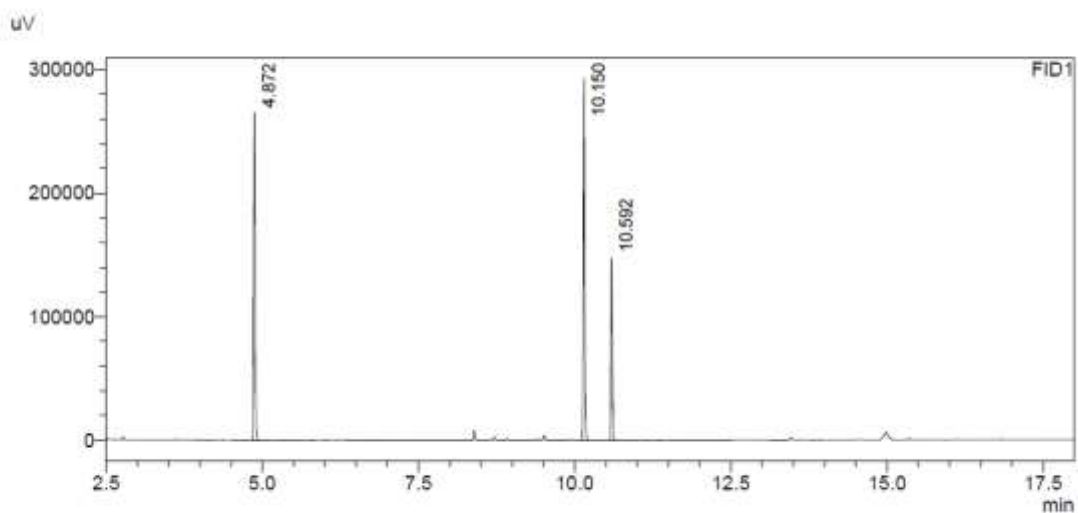

FID1

| Peak# | Ret. Time | Area    | Area%   |
|-------|-----------|---------|---------|
| 1     | 4.872     | 418408  | 39.332  |
| 2     | 10.150    | 431028  | 40.519  |
| 3     | 10.592    | 214345  | 20.149  |
| Total |           | 1063781 | 100.000 |

t = 24 h

Sample Name : t=24\_SOD-1027  
Sample ID :  
Data Filename : t=24\_SOD-1027.gcd  
Method Filename : Methode\_Achiral\_MUC\_Integration.gcm  
Batch Filename : achiralGC.gcb  
Vial # : 10  
Injection Volume : 5 uL  
Date Acquired : 21.02.2020 02:07:38  
Date Processed : 21.02.2020 02:28:23

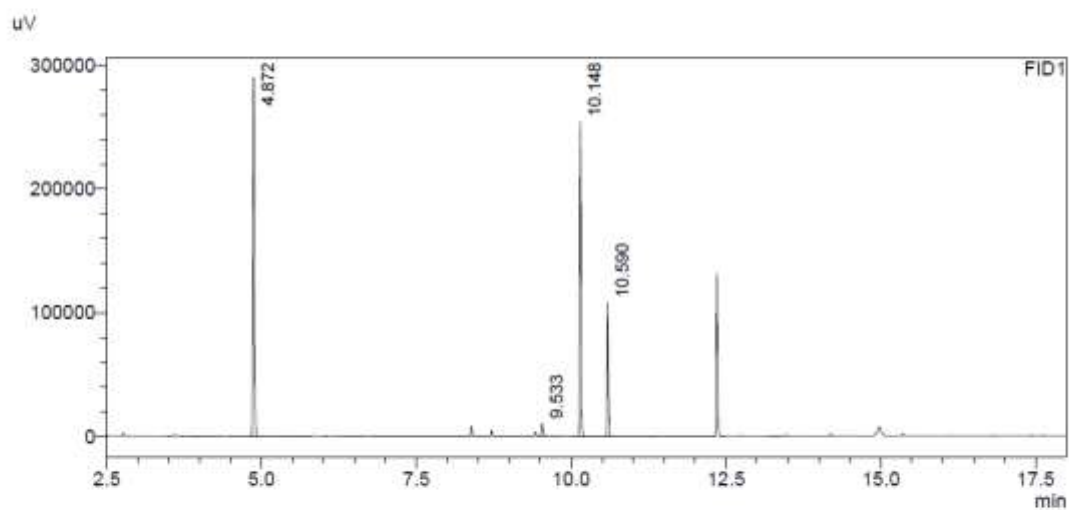

| Peak# | Ret. Time | Area    | Area%   |
|-------|-----------|---------|---------|
| 1     | 4.872     | 461569  | 45.529  |
| 2     | 9.533     | 18307   | 1.806   |
| 3     | 10.148    | 376758  | 37.163  |
| 4     | 10.590    | 157167  | 15.503  |
| Total |           | 1013800 | 100.000 |

Sample Name : t=24\_SOD-1028  
Sample ID :  
Data Filename : t=24\_SOD-1028.gcd  
Method Filename : Methode\_Achiral\_MUC\_Integration.gcm  
Batch Filename : achiralGC.gcb  
Vial # : 11  
Injection Volume : 5 uL  
Date Acquired : 21.02.2020 02:33:02  
Date Processed : 21.02.2020 02:53:47

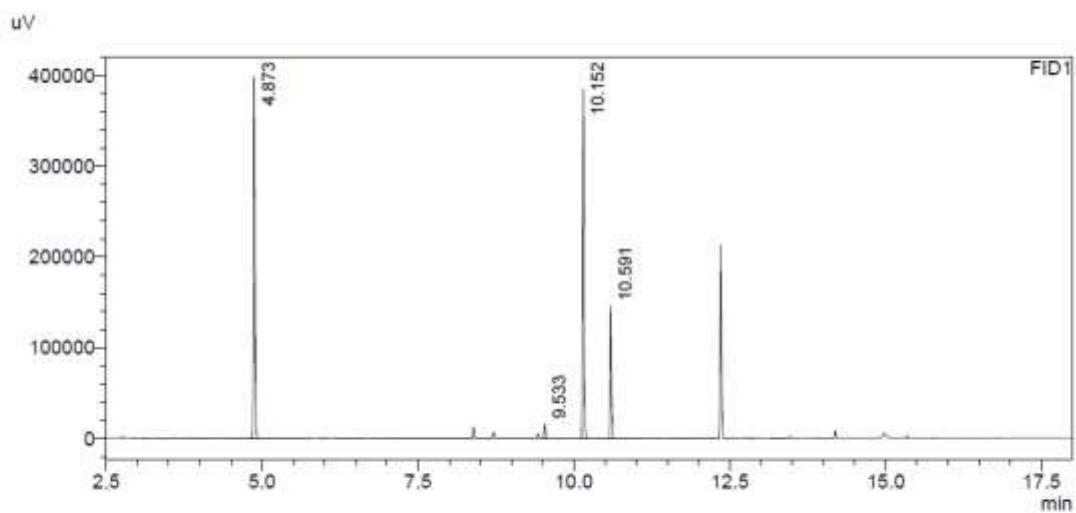

FID1

| Peak# | Ret. Time | Area    | Area%   |
|-------|-----------|---------|---------|
| 1     | 4.873     | 633220  | 44.023  |
| 2     | 9.533     | 27870   | 1.938   |
| 3     | 10.152    | 568014  | 39.490  |
| 4     | 10.591    | 209274  | 14.549  |
| Total |           | 1438378 | 100.000 |

Sample Name : t=24\_SOD-1029  
Sample ID :  
Data Filename : t=24\_SOD-1029.gcd  
Method Filename : Methode\_Achiral\_MUC\_Integration.gcm  
Batch Filename : achiralGC.gcb  
Vial # : 12  
Injection Volume : 5 uL  
Date Acquired : 21.02.2020 02:58:24  
Date Processed : 21.02.2020 03:19:08

uV

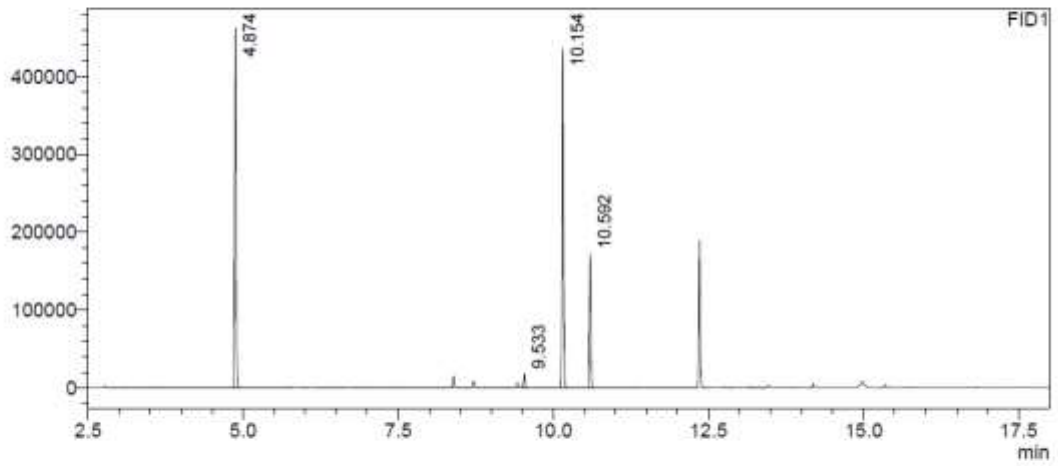

FID1

| Peak# | Ret. Time | Area    | Area%   |
|-------|-----------|---------|---------|
| 1     | 4.874     | 720700  | 43.402  |
| 2     | 9.533     | 32214   | 1.940   |
| 3     | 10.154    | 660419  | 39.771  |
| 4     | 10.592    | 247201  | 14.887  |
| Total |           | 1660534 | 100.000 |

t = 48 h

Sample Name : t=48\_SOD-1027  
Sample ID :  
Data Filename : t=48\_SOD-1027.gcd  
Method Filename : Methode\_Achiral\_MUC\_Integration.gcm  
Batch Filename : achiralGC.gcb  
Vial # : 10  
Injection Volume : 5 uL  
Date Acquired : 21.02.2020 23:15:16  
Date Processed : 21.02.2020 23:35:59

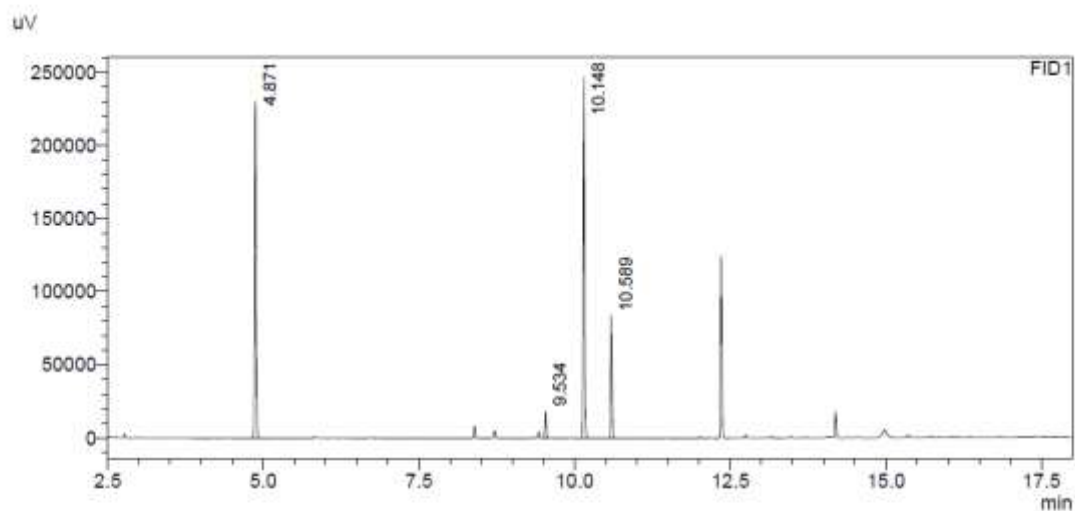

| Peak# | Ret. Time | Area   | Area%   |
|-------|-----------|--------|---------|
| 1     | 4.871     | 361521 | 41.512  |
| 2     | 9.534     | 29159  | 3.348   |
| 3     | 10.148    | 359802 | 41.315  |
| 4     | 10.589    | 120404 | 13.825  |
| Total |           | 870886 | 100.000 |

Sample Name : t=48\_SOD-1028  
 Sample ID :  
 Data Filename : t=48\_SOD-1028.gcd  
 Method Filename : Methode\_Achiral\_MUC\_Integration.gcm  
 Batch Filename : achiralGC.gcb  
 Vial # : 11  
 Injection Volume : 5 uL  
 Date Acquired : 21.02.2020 23:40:39  
 Date Processed : 22.02.2020 00:01:22

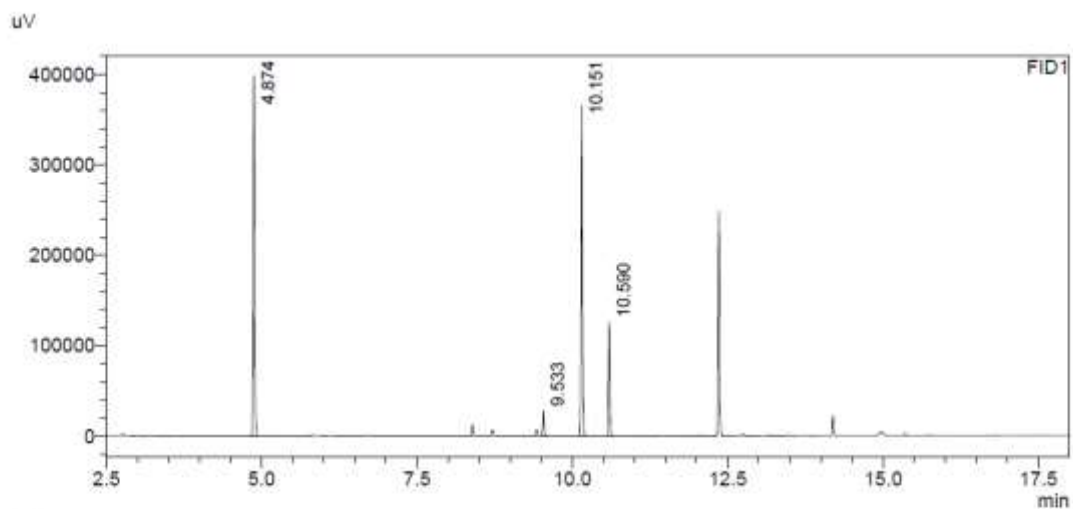

FID1

| Peak# | Ret. Time | Area    | Area%   |
|-------|-----------|---------|---------|
| 1     | 4.874     | 627238  | 45.253  |
| 2     | 9.533     | 44729   | 3.227   |
| 3     | 10.151    | 535407  | 38.628  |
| 4     | 10.590    | 178687  | 12.892  |
| Total |           | 1386061 | 100.000 |

Sample Name : t=48\_SOD-1029  
Sample ID :  
Data Filename : t=48\_SOD-1029.gcd  
Method Filename : Methode\_Achiral\_MUC\_Integration.gcm  
Batch Filename : achiralGC.gcb  
Vial # : 12  
Injection Volume : 5 uL  
Date Acquired : 22.02.2020 00:05:56  
Date Processed : 22.02.2020 00:26:41

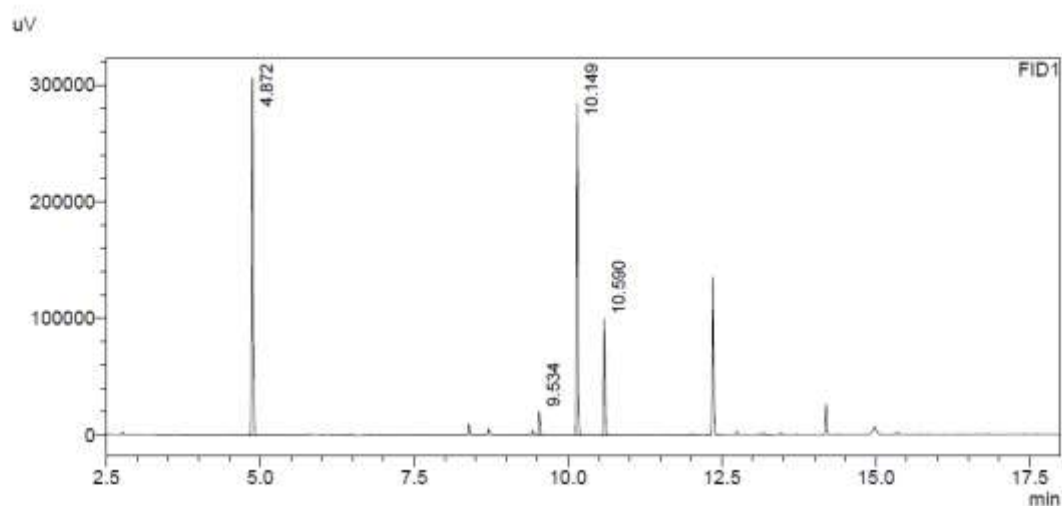

| Peak# | Ret. Time | Area    | Area%   |
|-------|-----------|---------|---------|
| 1     | 4.872     | 484113  | 45.028  |
| 2     | 9.534     | 33414   | 3.108   |
| 3     | 10.149    | 416110  | 38.703  |
| 4     | 10.590    | 141494  | 13.161  |
| Total |           | 1075131 | 100.000 |



t = 72 h

Sample Name : t=72\_SOD-1027  
Sample ID :  
Data Filename : t=72\_SOD-1027.gcd  
Method Filename : Methode\_Achiral\_MUC\_Integration.gcm  
Batch Filename : achiralGC.gcb  
Vial # : 10  
Injection Volume : 5 uL  
Date Acquired : 26.02.2020 21:50:27  
Date Processed : 26.02.2020 22:11:12

uV

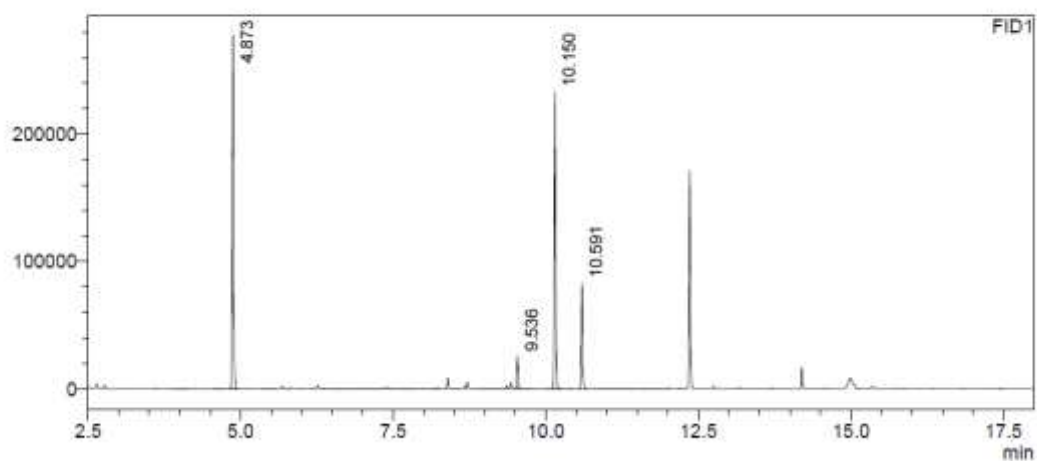

FID1

| Peak# | Ret. Time | Area   | Area%   |
|-------|-----------|--------|---------|
| 1     | 4.873     | 427832 | 45.938  |
| 2     | 9.536     | 40562  | 4.355   |
| 3     | 10.150    | 342439 | 36.769  |
| 4     | 10.591    | 120494 | 12.938  |
| Total |           | 931327 | 100.000 |

Sample Name : t=72\_SOD-1028  
Sample ID :  
Data Filename : t=72\_SOD-1028.gcd  
Method Filename : Methode\_Achiral\_MUC\_Integration.gcm  
Batch Filename : achiralGC.gcb  
Vial # : 11  
Injection Volume : 5 uL  
Date Acquired : 26.02.2020 22:15:51  
Date Processed : 26.02.2020 22:36:36

uV

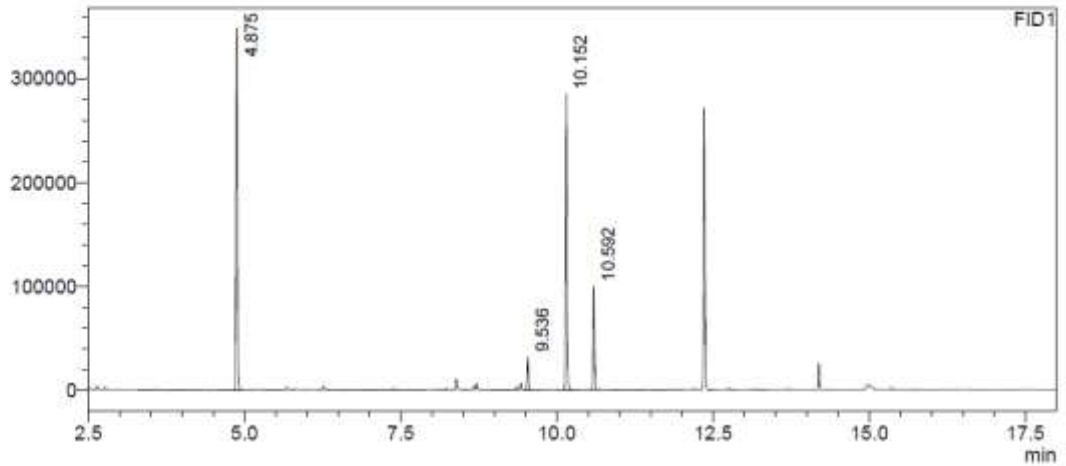

FID1

| Peak# | Ret. Time | Area    | Area%   |
|-------|-----------|---------|---------|
| 1     | 4.875     | 547466  | 46.889  |
| 2     | 9.536     | 49971   | 4.280   |
| 3     | 10.152    | 424205  | 36.332  |
| 4     | 10.592    | 145926  | 12.498  |
| Total |           | 1167567 | 100.000 |

Sample Name : t=72\_SOD-1029  
 Sample ID :  
 Data Filename : t=72\_SOD-1029.gcd  
 Method Filename : Methode\_Achiral\_MUC\_Integration.gcm  
 Batch Filename : achiralGC.gcb  
 Vial # : 12  
 Injection Volume : 5 uL  
 Date Acquired : 26.02.2020 22:41:10  
 Date Processed : 26.02.2020 23:01:53

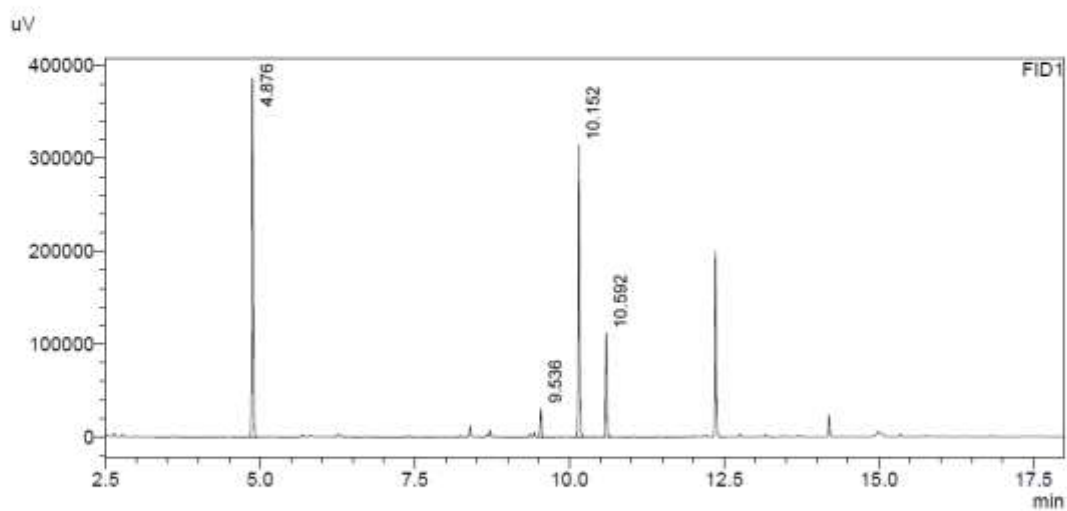

| Peak# | Ret. Time | Area    | Area%   |
|-------|-----------|---------|---------|
| 1     | 4.876     | 604727  | 47.548  |
| 2     | 9.536     | 49576   | 3.898   |
| 3     | 10.152    | 457193  | 35.948  |
| 4     | 10.592    | 160327  | 12.606  |
| Total |           | 1271822 | 100.000 |

No I, no *i*PrOH

**t = 0 min**

Sample Name : t=0\_SOD-1024  
Sample ID :  
Data Filename : t=0\_SOD-1024.gcd  
Method Filename : Methode\_Achiral\_MUC\_Integration.gcm  
Batch Filename : achiralGC.gcb  
Vial # : 40  
Injection Volume : 5 uL  
Date Acquired : 20.02.2020 09:38:17  
Date Processed : 20.02.2020 09:59:01

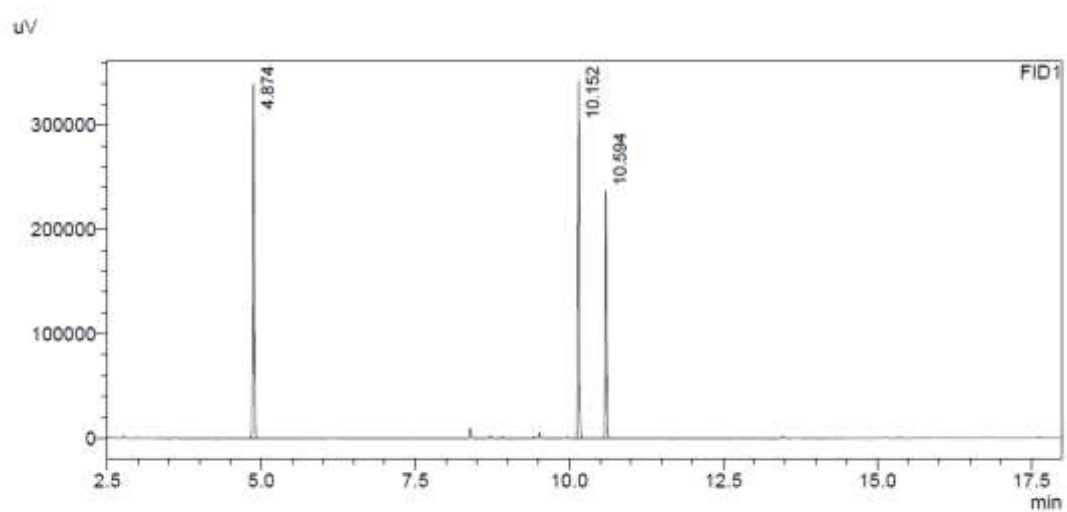

FID1

| Peak# | Ret. Time | Area    | Area%   |
|-------|-----------|---------|---------|
| 1     | 4.874     | 534286  | 38.693  |
| 2     | 10.152    | 506024  | 36.646  |
| 3     | 10.594    | 340522  | 24.661  |
| Total |           | 1380832 | 100.000 |

Sample Name : t=0\_SOD-1025  
Sample ID :  
Data Filename : t=0\_SOD-1025.gcd  
Method Filename : Methode\_Achiral\_MUC\_Integration.gcm  
Batch Filename : achiralGC.gcb  
Vial # : 41  
Injection Volume : 5 uL  
Date Acquired : 20.02.2020 10:03:39  
Date Processed : 20.02.2020 10:24:23

uV

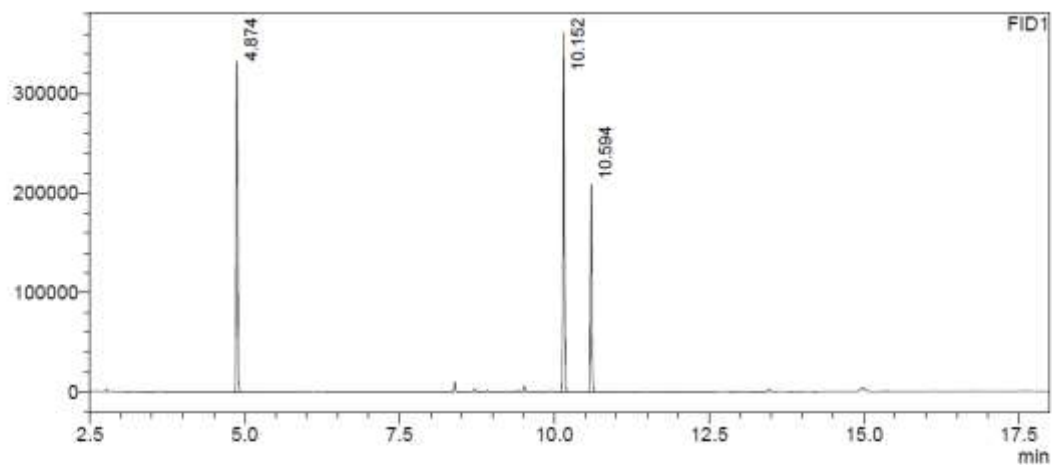

| Peak# | Ret. Time | Area    | Area%   |
|-------|-----------|---------|---------|
| 1     | 4.874     | 523760  | 38.083  |
| 2     | 10.152    | 544998  | 39.627  |
| 3     | 10.594    | 306545  | 22.289  |
| Total |           | 1375302 | 100.000 |

Sample Name : t=0\_SOD-1026  
Sample ID :  
Data Filename : t=0\_SOD-1026.gcd  
Method Filename : Methode\_Achiral\_MUC\_Integration.gcm  
Batch Filename : achiralGC.gcb  
Vial # : 42  
Injection Volume : 5 uL  
Date Acquired : 20.02.2020 10:29:01  
Date Processed : 20.02.2020 10:49:44

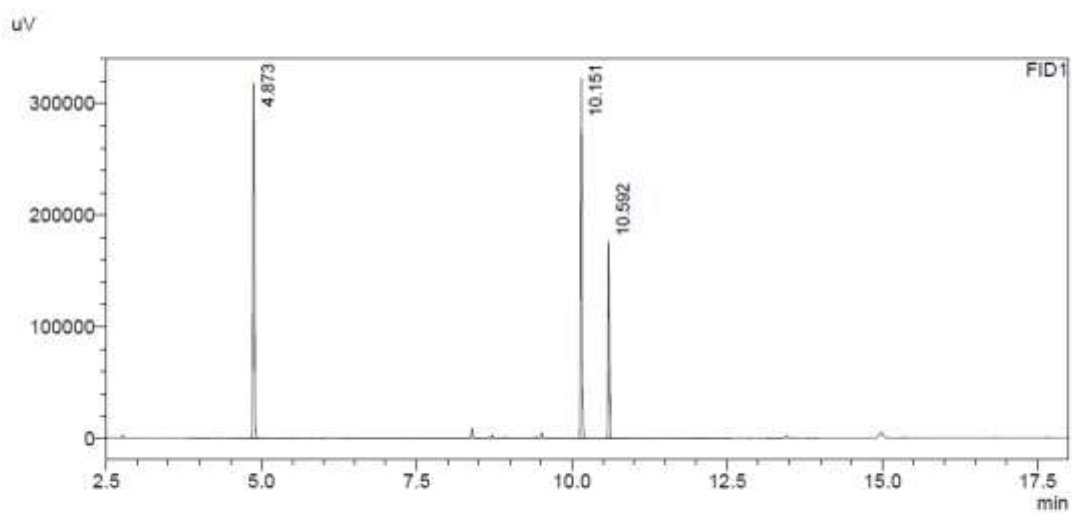

FID1

| Peak# | Ret. Time | Area    | Area%   |
|-------|-----------|---------|---------|
| 1     | 4.873     | 500975  | 40.614  |
| 2     | 10.151    | 480273  | 38.936  |
| 3     | 10.592    | 252256  | 20.450  |
| Total |           | 1233504 | 100.000 |

t = 24 h

Sample Name : t=24\_SOD-1024  
Sample ID :  
Data Filename : t=24\_SOD-1024.gcd  
Method Filename : Methode\_Achiral\_MUC\_Integration.gcm  
Batch Filename : achiralGC.gcb  
Vial # : 7  
Injection Volume : 5 uL  
Date Acquired : 21.02.2020 00:51:35  
Date Processed : 21.02.2020 01:12:19

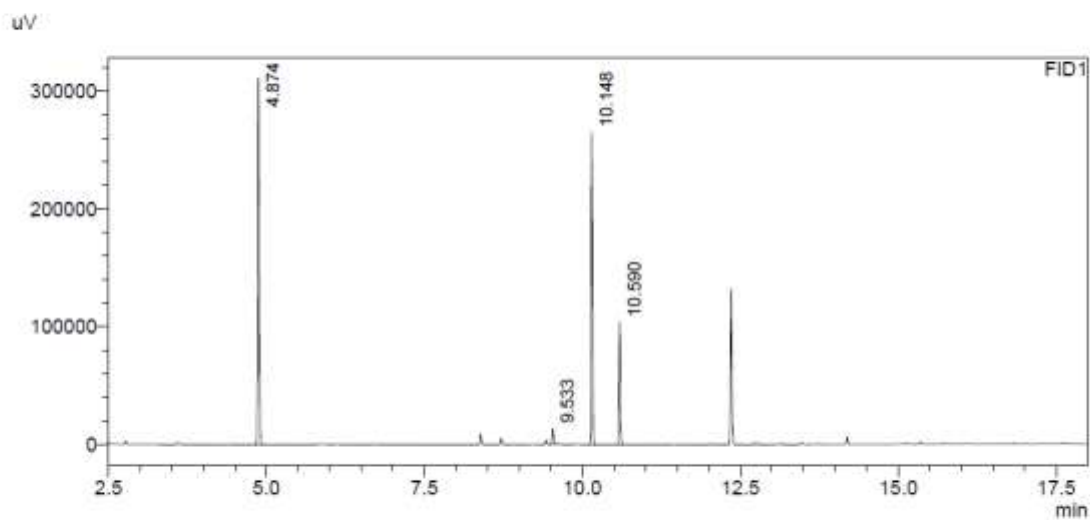

| Peak# | Ret. Time | Area    | Area%   |
|-------|-----------|---------|---------|
| 1     | 4.874     | 495839  | 47.199  |
| 2     | 9.533     | 22089   | 2.103   |
| 3     | 10.148    | 383560  | 36.511  |
| 4     | 10.590    | 149048  | 14.188  |
| Total |           | 1050535 | 100.000 |

Sample Name : t=24\_SOD-1025  
 Sample ID :  
 Data Filename : t=24\_SOD-1025.gcd  
 Method Filename : Methode\_Achiral\_MUC\_Integration.gcm  
 Batch Filename : achiralGC.gcb  
 Vial # : 8  
 Injection Volume : 5 uL  
 Date Acquired : 21.02.2020 01:16:55  
 Date Processed : 21.02.2020 01:37:39

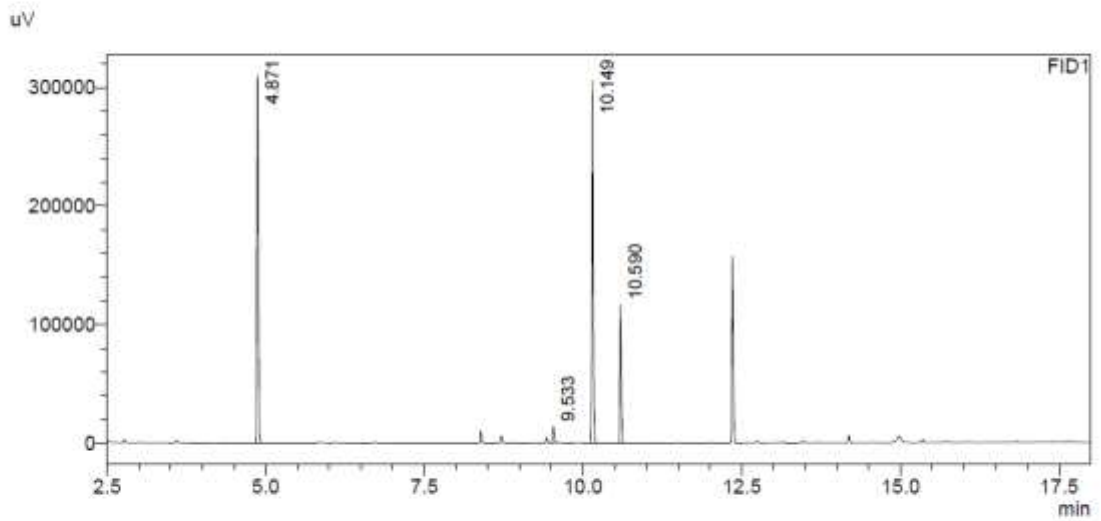

FID1

| Peak# | Ret. Time | Area    | Area%   |
|-------|-----------|---------|---------|
| 1     | 4.871     | 488956  | 43.997  |
| 2     | 9.533     | 23673   | 2.130   |
| 3     | 10.149    | 431635  | 38.840  |
| 4     | 10.590    | 167062  | 15.033  |
| Total |           | 1111326 | 100.000 |



Sample Name : t=24\_SOD-1026  
 Sample ID :  
 Data Filename : t=24\_SOD-1026.gcd  
 Method Filename : Methode\_Achiral\_MUC\_Integration.gcm  
 Batch Filename : achiralGC.gcb  
 Vial # : 9  
 Injection Volume : 5 uL  
 Date Acquired : 21.02.2020 01:42:17  
 Date Processed : 21.02.2020 02:03:00

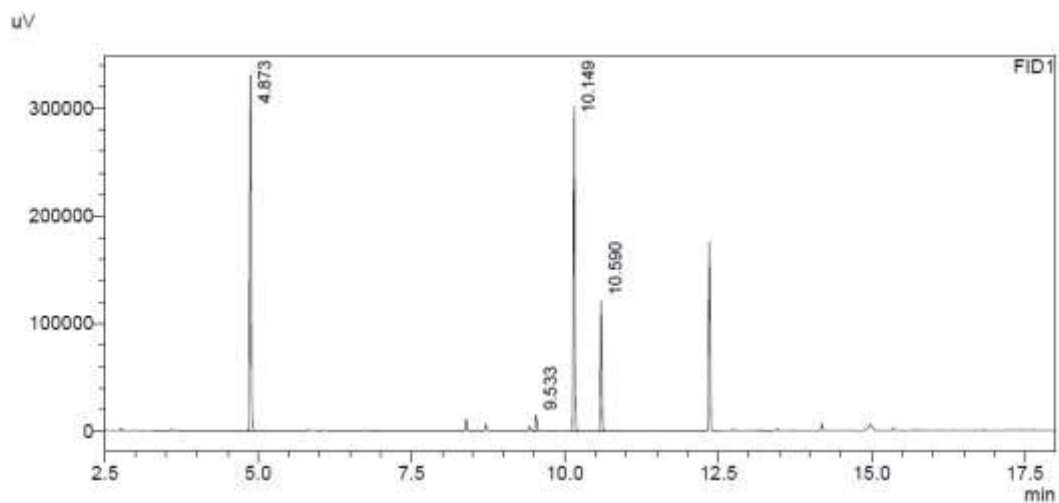

FID1

| Peak# | Ret. Time | Area    | Area%   |
|-------|-----------|---------|---------|
| 1     | 4.873     | 531824  | 45.135  |
| 2     | 9.533     | 25366   | 2.153   |
| 3     | 10.149    | 448531  | 38.066  |
| 4     | 10.590    | 172585  | 14.647  |
| Total |           | 1178306 | 100.000 |

t = 48 h

Sample Name : t=48\_SOD-1024  
Sample ID :  
Data Filename : t=48\_SOD-1024.gcd  
Method Filename : Methode\_Achiral\_MUC\_Integration.gcm  
Batch Filename : achiralGC.gcb  
Vial # : 7  
Injection Volume : 5 uL  
Date Acquired : 21.02.2020 21:59:24  
Date Processed : 21.02.2020 22:20:09

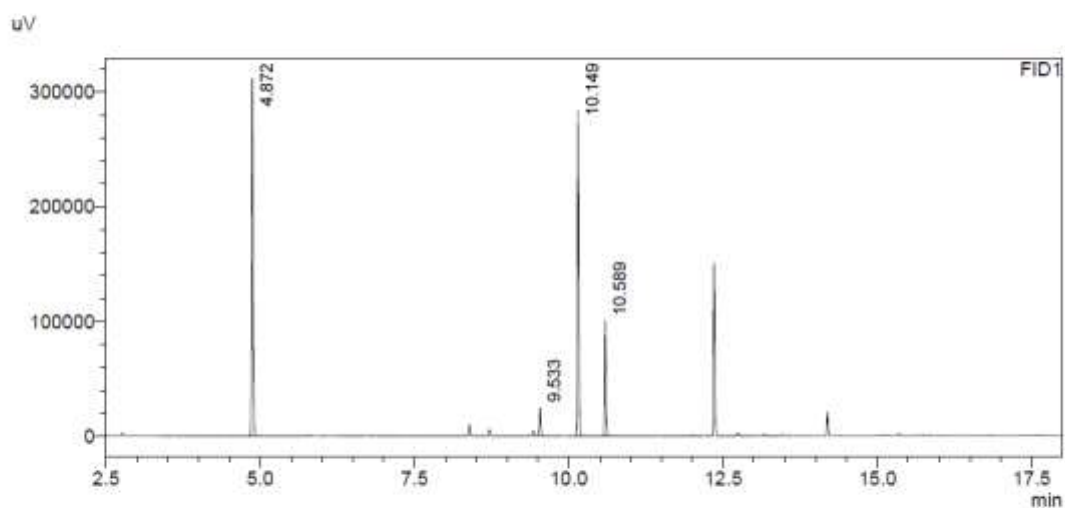

FID1

| Peak# | Ret. Time | Area    | Area%   |
|-------|-----------|---------|---------|
| 1     | 4.872     | 485911  | 44.605  |
| 2     | 9.533     | 39731   | 3.647   |
| 3     | 10.149    | 420937  | 38.640  |
| 4     | 10.589    | 142793  | 13.108  |
| Total |           | 1089371 | 100.000 |

Sample Name : t=48\_SOD-1025  
 Sample ID :  
 Data Filename : t=48\_SOD-1025.gcd  
 Method Filename : Methode\_Achiral\_MUC\_Integration.gcm  
 Batch Filename : achiralGC.gcb  
 Vial # : 8  
 Injection Volume : 5 uL  
 Date Acquired : 21.02.2020 22:24:43  
 Date Processed : 21.02.2020 22:45:27

uV

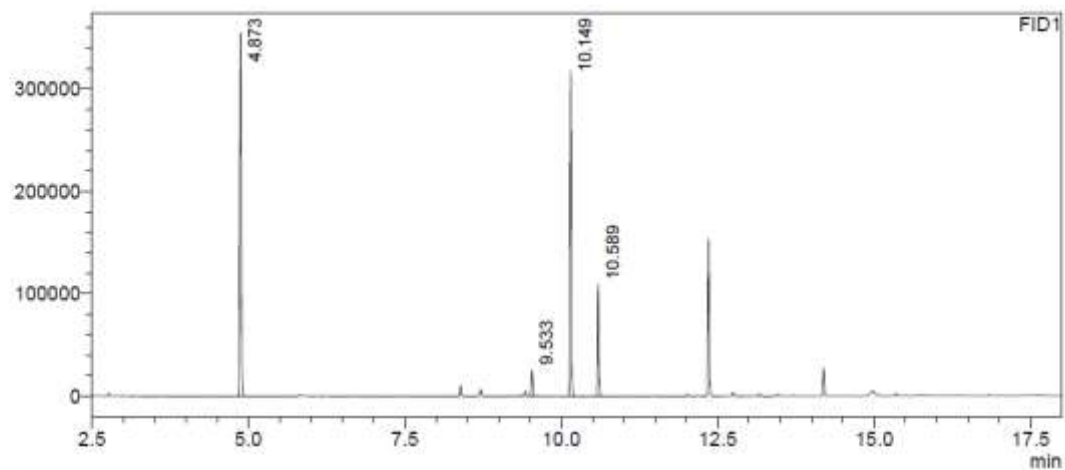

FID1

| Peak# | Ret. Time | Area    | Area%   |
|-------|-----------|---------|---------|
| 1     | 4.873     | 559578  | 45.868  |
| 2     | 9.533     | 41294   | 3.385   |
| 3     | 10.149    | 461642  | 37.840  |
| 4     | 10.589    | 157462  | 12.907  |
| Total |           | 1219976 | 100.000 |

Sample Name : t=48\_SOD-1026  
 Sample ID :  
 Data Filename : t=48\_SOD-1026.gcd  
 Method Filename : Methode\_Achiral\_MUC\_Integration.gcm  
 Batch Filename : achiralGC.gcb  
 Vial # : 9  
 Injection Volume : 5 uL  
 Date Acquired : 21.02.2020 22:49:59  
 Date Processed : 21.02.2020 23:10:43

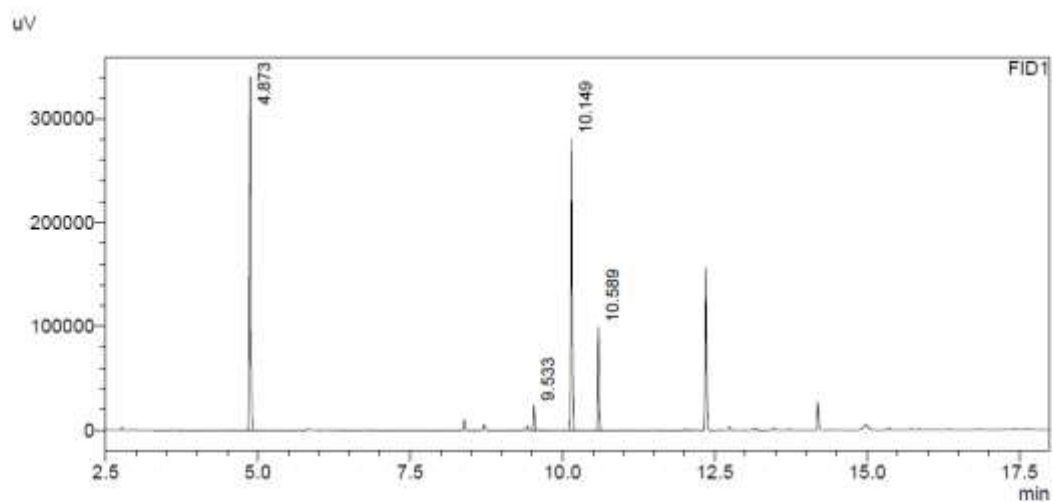

FID1

| Peak# | Ret. Time | Area    | Area%   |
|-------|-----------|---------|---------|
| 1     | 4.873     | 535767  | 47.345  |
| 2     | 9.533     | 37991   | 3.357   |
| 3     | 10.149    | 415110  | 36.683  |
| 4     | 10.589    | 142747  | 12.614  |
| Total |           | 1131615 | 100.000 |

t = 72 h

Sample Name : t=72\_SOD-1024  
Sample ID :  
Data Filename : t=72\_SOD-1024.gcd  
Method Filename : Methode\_Achiral\_MUC\_Integration.gcm  
Batch Filename : achiralGC.gcb  
Vial # : 7  
Injection Volume : 5 uL  
Date Acquired : 26.02.2020 20:09:09  
Date Processed : 26.02.2020 20:29:53

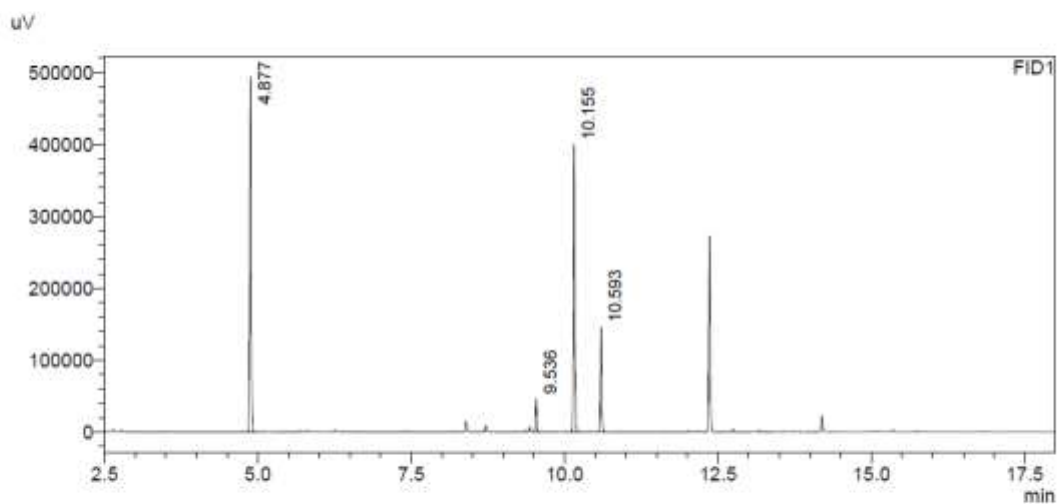

FID1

| Peak# | Ret. Time | Area    | Area%   |
|-------|-----------|---------|---------|
| 1     | 4.877     | 786840  | 47.396  |
| 2     | 9.536     | 73231   | 4.411   |
| 3     | 10.155    | 594104  | 35.786  |
| 4     | 10.593    | 205975  | 12.407  |
| Total |           | 1660149 | 100.000 |

Sample Name : t=72\_SOD-1025  
 Sample ID :  
 Data Filename : t=72\_SOD-1025.gcd  
 Method Filename : Methode\_Achiral\_MUC\_Integration.gcm  
 Batch Filename : achiralGC.gcb  
 Vial # : 8  
 Injection Volume : 5 uL  
 Date Acquired : 26.02.2020 20:59:52  
 Date Processed : 26.02.2020 21:20:36

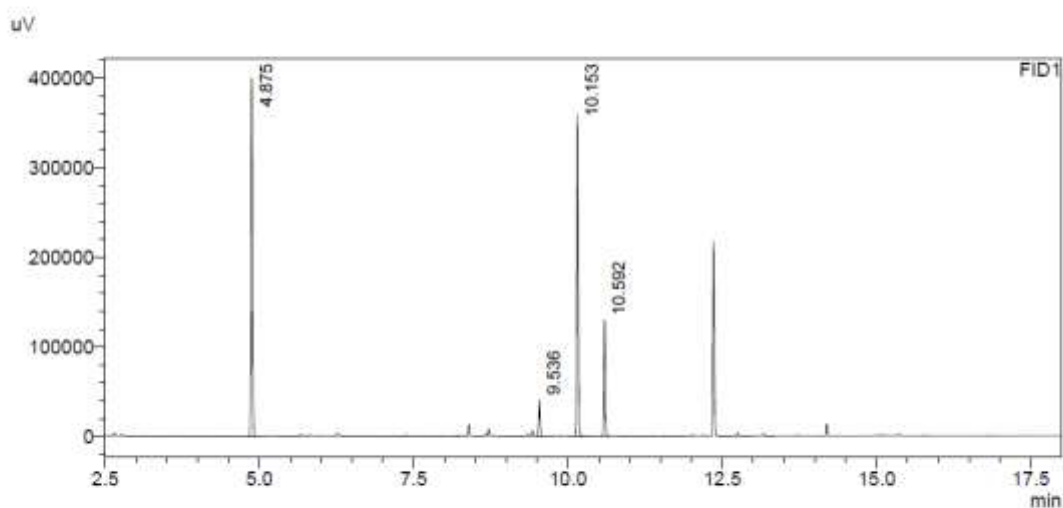

FID1

| Peak# | Ret. Time | Area    | Area%   |
|-------|-----------|---------|---------|
| 1     | 4.875     | 640063  | 44.861  |
| 2     | 9.536     | 63872   | 4.477   |
| 3     | 10.153    | 536259  | 37.585  |
| 4     | 10.592    | 186586  | 13.077  |
| Total |           | 1426780 | 100.000 |

Sample Name : t=72\_SOD-1026  
Sample ID :  
Data Filename : t=72\_SOD-1026.gcd  
Method Filename : Methode\_Achiral\_MUC\_Integration.gcm  
Batch Filename : achiralGC.gcb  
Vial # : 9  
Injection Volume : 5 uL  
Date Acquired : 26.02.2020 21:25:11  
Date Processed : 26.02.2020 21:45:55

uV

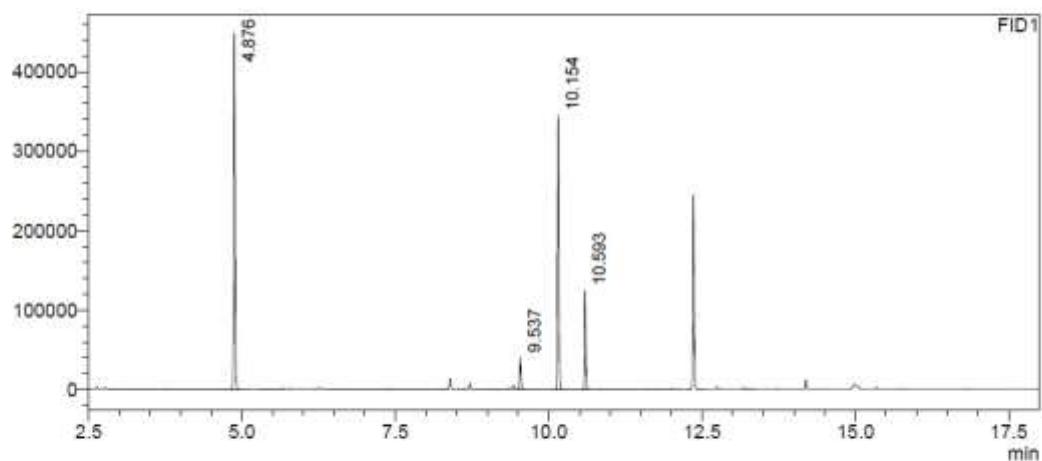

FID1

| Peak# | Ret. Time | Area    | Area%   |
|-------|-----------|---------|---------|
| 1     | 4.876     | 706743  | 48.142  |
| 2     | 9.537     | 63345   | 4.315   |
| 3     | 10.154    | 516988  | 35.216  |
| 4     | 10.593    | 180960  | 12.327  |
| Total |           | 1468035 | 100.000 |

### Entry 3

I, *i*PrOH

t = 0 min

Sample Name : t=0\_SOD\_821-826  
Sample ID :  
Data Filename : t=0.gcd  
Method Filename : Methode\_Achiral\_MUC\_Integration.gcm  
Batch Filename : batch.gcb  
Vial # : 1  
Injection Volume : 5 uL  
Date Acquired : 13.08.2019 16:02:44  
Date Processed : 13.08.2019 16:23:27

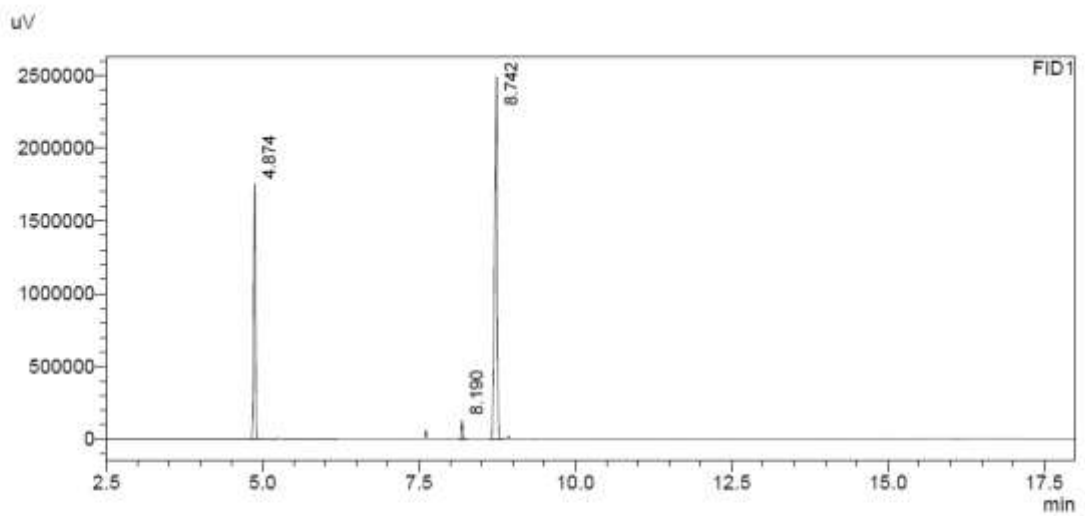

FID1

| Peak# | Ret. Time | Area     | Area%   |
|-------|-----------|----------|---------|
| 1     | 4.874     | 3381103  | 32.405  |
| 2     | 8.190     | 198627   | 1.904   |
| 3     | 8.742     | 6854233  | 65.692  |
| Total |           | 10433963 | 100.000 |



t = 24 h

Sample Name : t=24\_SOD\_824  
Sample ID :  
Data Filename : t=24\_SOD\_824.gcd  
Method Filename : Methode\_Achiral\_MUC\_Integration.gcm  
Batch Filename : batch.gcb  
Vial # : 4  
Injection Volume : 5 uL  
Date Acquired : 15.08.2019 12:01:29  
Date Processed : 15.08.2019 12:22:12

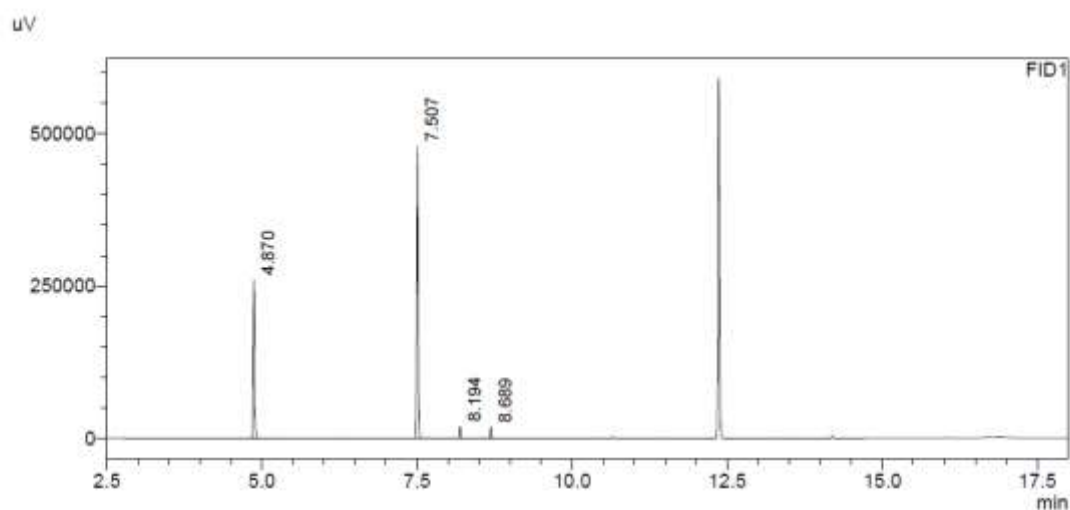

| Peak# | Ret. Time | Area    | Area%   |
|-------|-----------|---------|---------|
| 1     | 4.870     | 412043  | 34.493  |
| 2     | 7.507     | 725594  | 60.740  |
| 3     | 8.194     | 29407   | 2.462   |
| 4     | 8.689     | 27538   | 2.305   |
| Total |           | 1194582 | 100.000 |

Sample Name : t=24\_SOD\_825  
Sample ID :  
Data Filename : t=24\_SOD\_825.gcd  
Method Filename : Methode\_Achiral\_MUC\_Integration.gcm  
Batch Filename : batch.gcb  
Vial # : 5  
Injection Volume : 5 uL  
Date Acquired : 15.08.2019 12:26:51  
Date Processed : 15.08.2019 12:47:37

uV

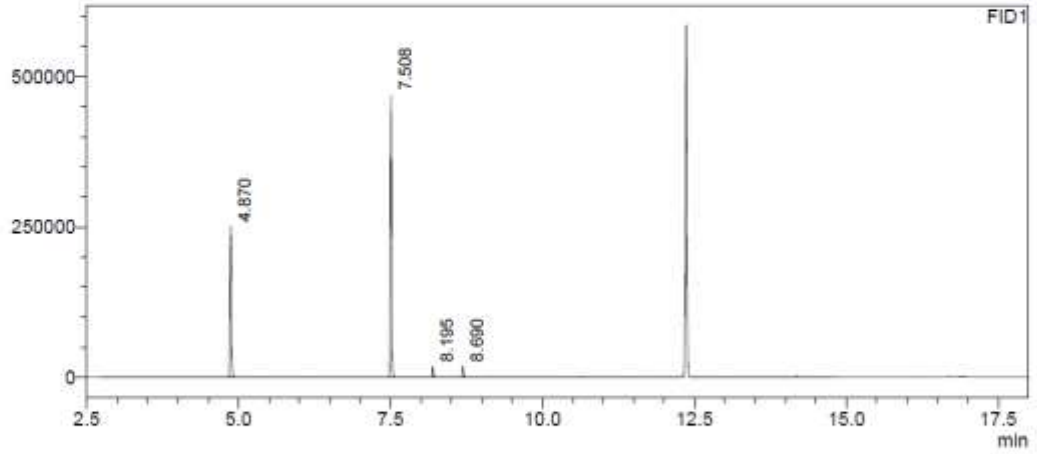

| Peak# | Ret. Time | Area    | Area%   |
|-------|-----------|---------|---------|
| 1     | 4.870     | 402344  | 34.686  |
| 2     | 7.508     | 700291  | 60.371  |
| 3     | 8.195     | 30116   | 2.596   |
| 4     | 8.690     | 27225   | 2.347   |
| Total |           | 1159977 | 100.000 |

Sample Name : t=24\_SOD\_826  
 Sample ID :  
 Data Filename : t=24\_SOD\_826.gcd  
 Method Filename : Methode\_Achiral\_MUC\_Integration.gcm  
 Batch Filename : batch.gcb  
 Vial # : 6  
 Injection Volume : 5 uL  
 Date Acquired : 15.08.2019 12:52:11  
 Date Processed : 15.08.2019 13:12:56

uV

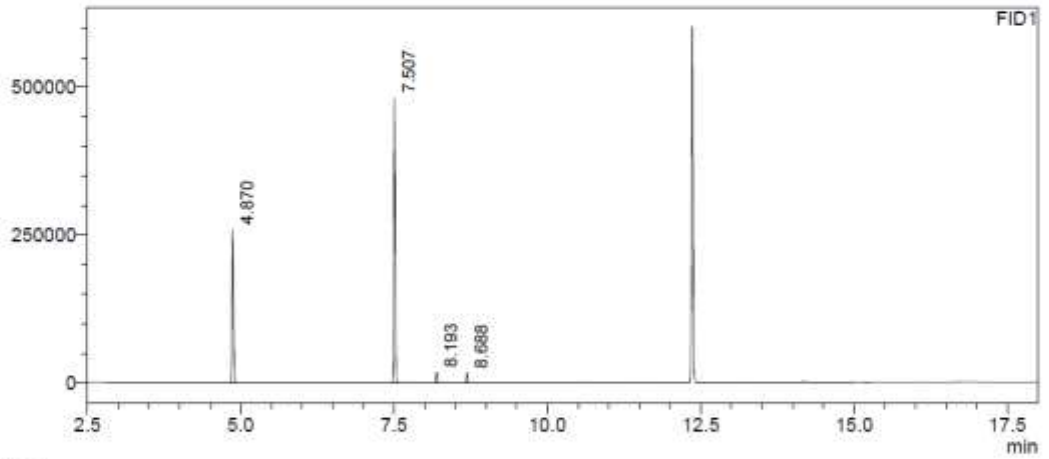

FID1

| Peak# | Ret. Time | Area    | Area%   |
|-------|-----------|---------|---------|
| 1     | 4.870     | 411682  | 34.408  |
| 2     | 7.507     | 731856  | 61.168  |
| 3     | 8.193     | 27945   | 2.336   |
| 4     | 8.688     | 24990   | 2.089   |
| Total |           | 1196473 | 100.000 |

t = 48 h

Sample Name : t=48\_SOD\_824  
Sample ID :  
Data Filename : t=48\_SOD\_824.gcd  
Method Filename : Methode\_Achiral\_MUC\_Integration.gcm  
Batch Filename : batch.gcb  
Vial # : 4  
Injection Volume : 5 uL  
Date Acquired : 16.08.2019 11:46:59  
Date Processed : 16.08.2019 12:07:44

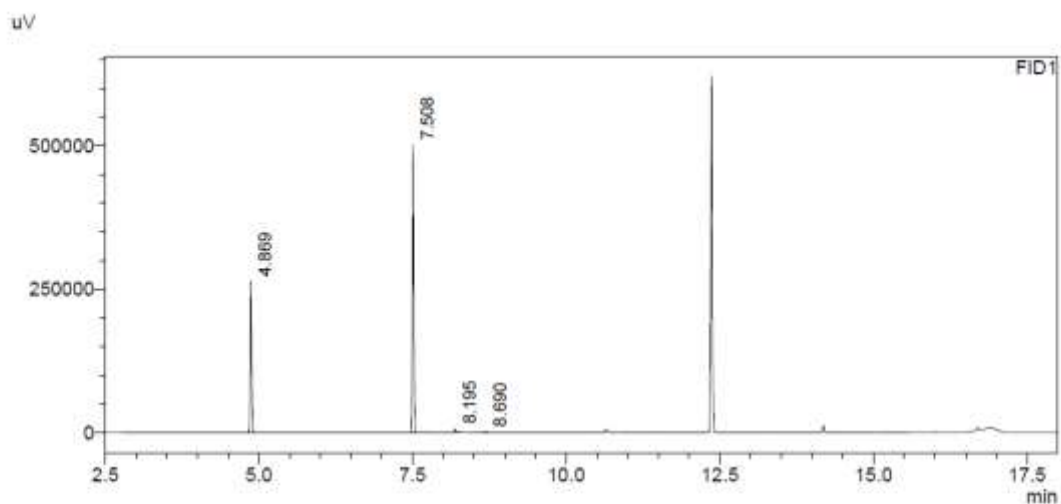

| Peak# | Ret. Time | Area    | Area%   |
|-------|-----------|---------|---------|
| 1     | 4.869     | 413119  | 35.452  |
| 2     | 7.508     | 739480  | 63.458  |
| 3     | 8.195     | 8368    | 0.718   |
| 4     | 8.690     | 4338    | 0.372   |
| Total |           | 1165305 | 100.000 |

Sample Name : t=48\_SOD\_825  
Sample ID :  
Data Filename : t=48\_SOD\_825.gcd  
Method Filename : Methode\_Achiral\_MUC\_Integration.gcm  
Batch Filename : batch.gcb  
Vial # : 5  
Injection Volume : 5 uL  
Date Acquired : 16.08.2019 12:12:20  
Date Processed : 16.08.2019 12:33:03

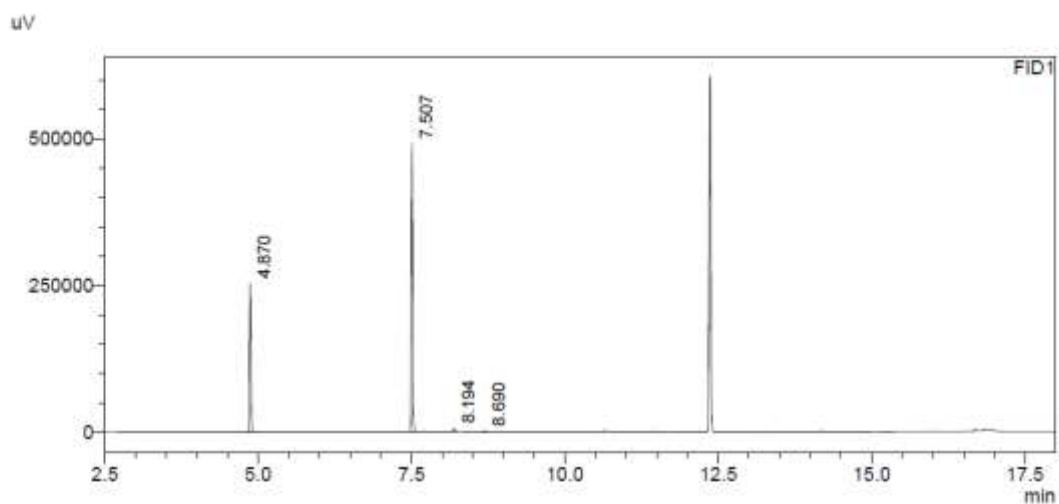

FID1

| Peak# | Ret. Time | Area    | Area%   |
|-------|-----------|---------|---------|
| 1     | 4.870     | 395585  | 34.693  |
| 2     | 7.507     | 731908  | 64.188  |
| 3     | 8.194     | 8929    | 0.783   |
| 4     | 8.690     | 3838    | 0.337   |
| Total |           | 1140260 | 100.000 |

Sample Name : t=48\_SOD\_826  
 Sample ID :  
 Data Filename : t=48\_SOD\_826.gcd  
 Method Filename : Methode\_Achiral\_MUC\_Integration.gcm  
 Batch Filename : batch.gcb  
 Vial # : 6  
 Injection Volume : 5 uL  
 Date Acquired : 16.08.2019 12:37:38  
 Date Processed : 16.08.2019 12:58:22

uV

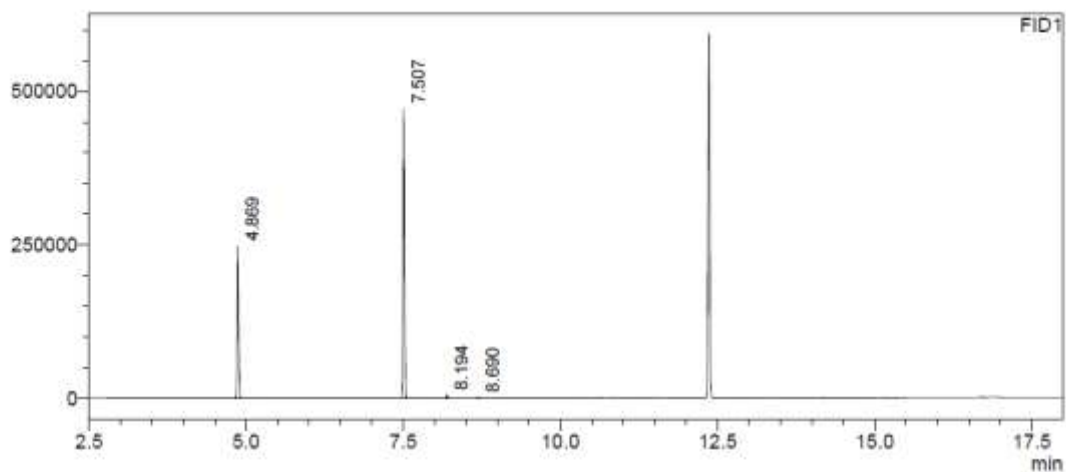

FID1

| Peak# | Ret. Time | Area    | Area%   |
|-------|-----------|---------|---------|
| 1     | 4.869     | 389594  | 34.885  |
| 2     | 7.507     | 714684  | 63.995  |
| 3     | 8.194     | 9262    | 0.829   |
| 4     | 8.690     | 3250    | 0.291   |
| Total |           | 1116789 | 100.000 |

t = 72 h

Sample Name : t=72\_SOD\_824  
Sample ID :  
Data Filename : t=72\_SOD\_824.gcd  
Method Filename : Methode\_Achiral\_MUC\_Integration.gcm  
Batch Filename : batch.gcb  
Vial # : 19  
Injection Volume : 5 uL  
Date Acquired : 16.08.2019 21:08:47  
Date Processed : 16.08.2019 21:29:31

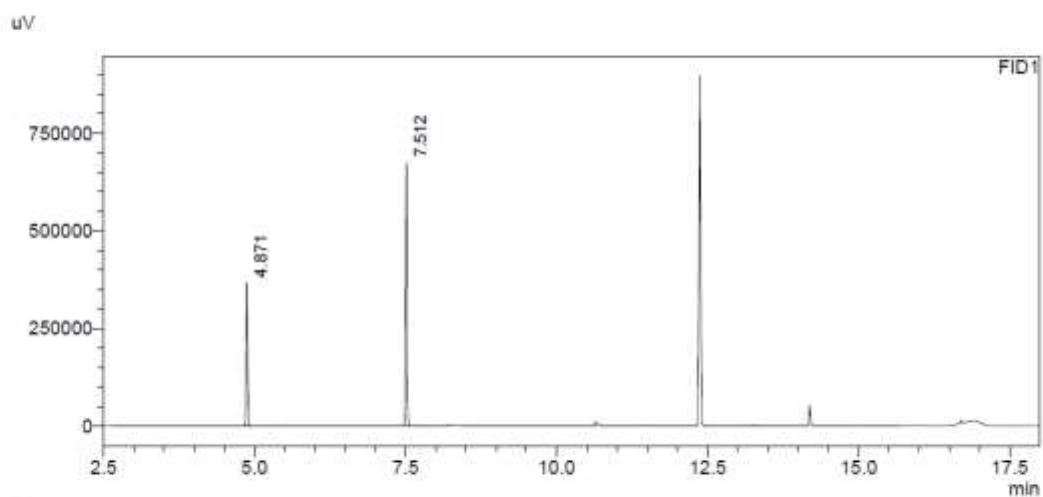

FID1

| Peak# | Ret. Time | Area    | Area%   |
|-------|-----------|---------|---------|
| 1     | 4.871     | 582494  | 35.485  |
| 2     | 7.512     | 1059009 | 64.515  |
| Total |           | 1641504 | 100.000 |

Sample Name : t=72\_SOD\_825  
Sample ID :  
Data Filename : t=72\_SOD\_825.gcd  
Method Filename : Methode\_Achiral\_MUC\_Integration.gcm  
Batch Filename : batch.gcb  
Vial # : 20  
Injection Volume : 5 uL  
Date Acquired : 16.08.2019 21:34:11  
Date Processed : 16.08.2019 21:54:55

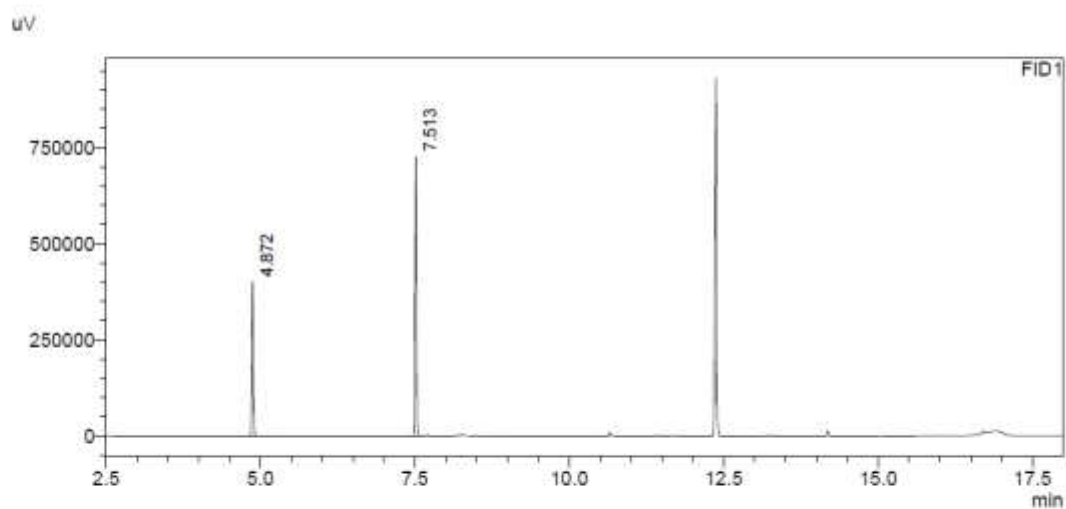

FID1

| Peak# | Ret. Time | Area    | Area%   |
|-------|-----------|---------|---------|
| 1     | 4.872     | 640718  | 35.664  |
| 2     | 7.513     | 1155839 | 64.336  |
| Total |           | 1796556 | 100.000 |



Sample Name : t=72\_SOD\_826  
Sample ID :  
Data Filename : t=72\_SOD\_826.gcd  
Method Filename : Methode\_Achiral\_MUC\_Integration.gcm  
Batch Filename : batch.gcb  
Vial # : 21  
Injection Volume : 5 uL  
Date Acquired : 16.08.2019 21:59:35  
Date Processed : 16.08.2019 22:20:18

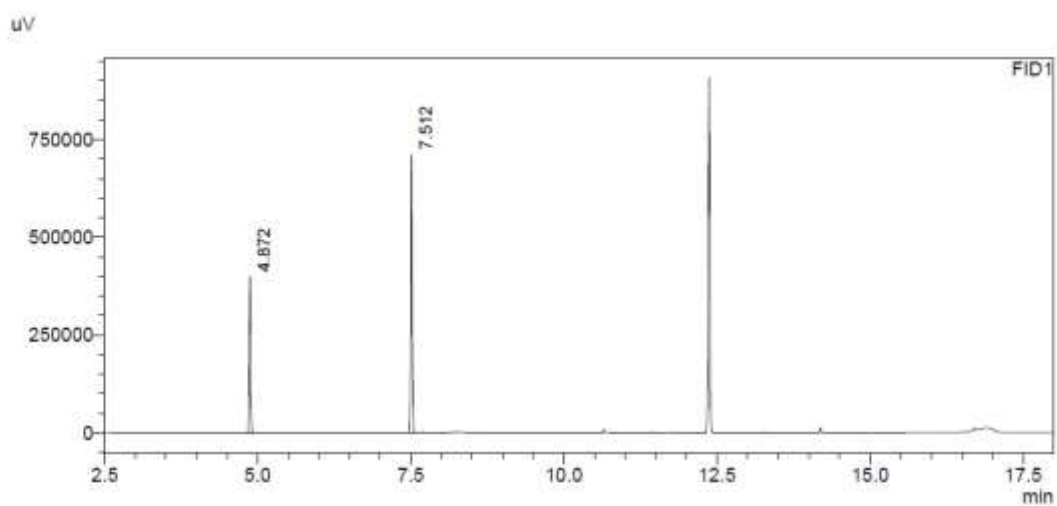

FID1

| Peak# | Ret. Time | Area    | Area%   |
|-------|-----------|---------|---------|
| 1     | 4.872     | 623824  | 35.607  |
| 2     | 7.512     | 1128158 | 64.393  |
| Total |           | 1751981 | 100.000 |

I, no *i*PrOH

t = 0 min

Sample Name : t=0\_SOD\_821-826  
Sample ID :  
Data Filename : t=0.gcd  
Method Filename : Methode\_Achiral\_MUC\_Integration.gcm  
Batch Filename : batch.gcb  
Vial # : 1  
Injection Volume : 5 uL  
Date Acquired : 13.08.2019 16:02:44  
Date Processed : 13.08.2019 16:23:27

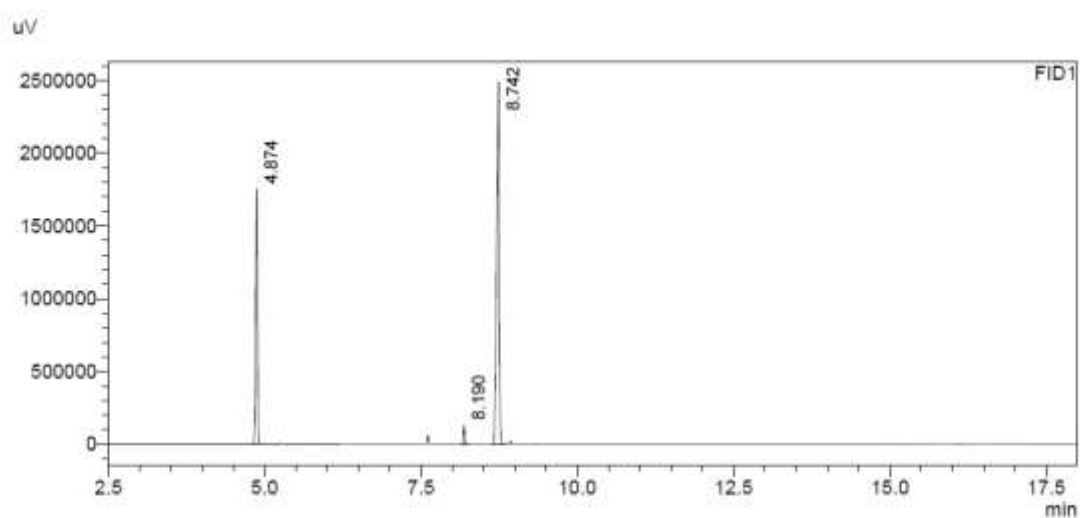

| Peak# | Ret. Time | Area     | Area%   |
|-------|-----------|----------|---------|
| 1     | 4.874     | 3381103  | 32.405  |
| 2     | 8.190     | 198627   | 1.904   |
| 3     | 8.742     | 6854233  | 65.692  |
| Total |           | 10433963 | 100.000 |

t = 24 h

Sample Name : t=24\_SOD\_821  
Sample ID :  
Data Filename : t=24\_SOD\_821.gcd  
Method Filename : Methode\_Achiral\_MUC\_Integration.gcm  
Batch Filename : batch.gcb  
Vial # : 1  
Injection Volume : 5 uL  
Date Acquired : 15.08.2019 10:45:37  
Date Processed : 15.08.2019 11:06:21

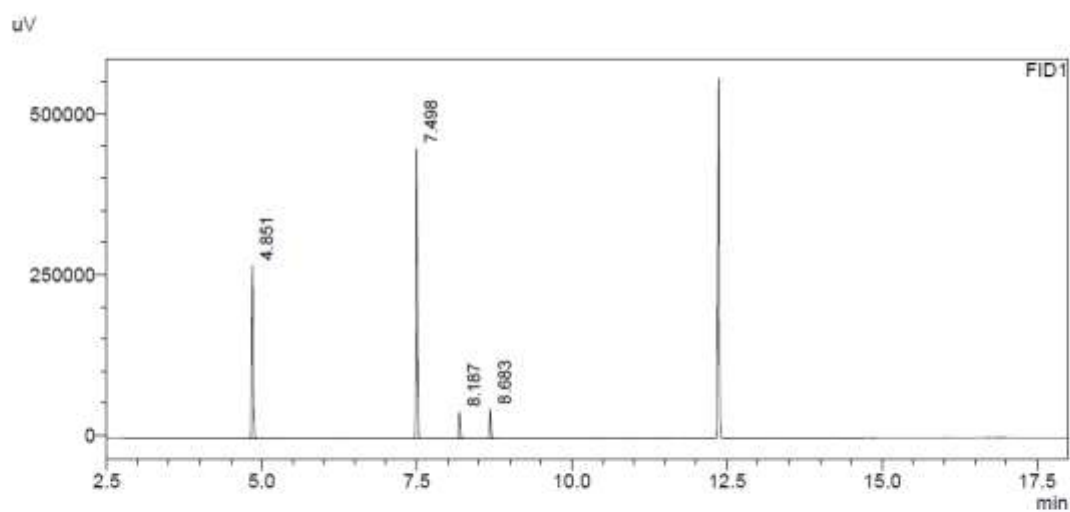

| Peak# | Ret. Time | Area    | Area%   |
|-------|-----------|---------|---------|
| 1     | 4.851     | 425823  | 34.259  |
| 2     | 7.498     | 686933  | 55.266  |
| 3     | 8.187     | 62500   | 5.028   |
| 4     | 8.683     | 67704   | 5.447   |
| Total |           | 1242961 | 100.000 |

Sample Name : t=24\_SOD\_822  
 Sample ID :  
 Data Filename : t=24\_SOD\_822.gcd  
 Method Filename : Methode\_Achiral\_MUC\_Integration.gcm  
 Batch Filename : batch.gcb  
 Vial # : 2  
 Injection Volume : 5 uL  
 Date Acquired : 15.08.2019 11:10:51  
 Date Processed : 15.08.2019 11:31:35

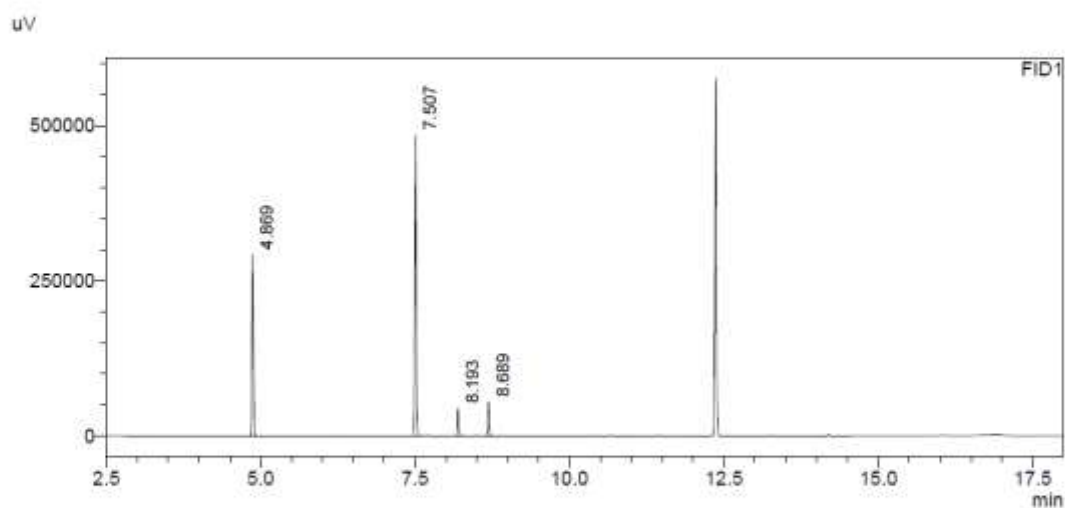

FID1

| Peak# | Ret. Time | Area    | Area%   |
|-------|-----------|---------|---------|
| 1     | 4.869     | 461908  | 34.716  |
| 2     | 7.507     | 724306  | 54.437  |
| 3     | 8.193     | 65054   | 4.889   |
| 4     | 8.689     | 79269   | 5.958   |
| Total |           | 1330537 | 100.000 |

Sample Name : t=24\_SOD\_823  
 Sample ID :  
 Data Filename : t=24\_SOD\_823.gcd  
 Method Filename : Methode\_Achiral\_MUC\_Integration.gcm  
 Batch Filename : batch.gcb  
 Vial # : 3  
 Injection Volume : 5 uL  
 Date Acquired : 15.08.2019 11:36:12  
 Date Processed : 15.08.2019 11:56:56

uv

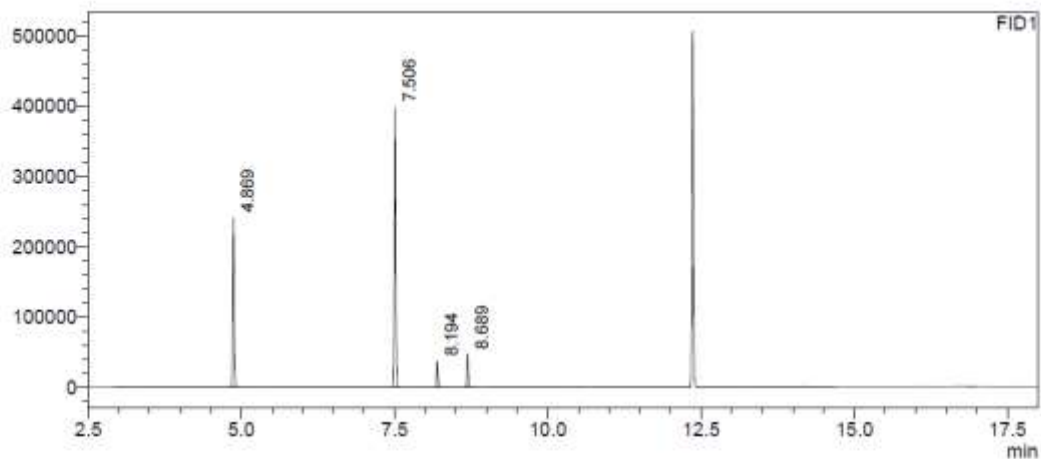

FID1

| Peak# | Ret. Time | Area    | Area%   |
|-------|-----------|---------|---------|
| 1     | 4.869     | 380379  | 34.558  |
| 2     | 7.506     | 593659  | 53.934  |
| 3     | 8.194     | 57316   | 5.207   |
| 4     | 8.689     | 69353   | 6.301   |
| Total |           | 1100707 | 100.000 |

t = 48 h

Sample Name : t=48\_SOD\_821  
Sample ID :  
Data Filename : t=48\_SOD\_821.gcd  
Method Filename : Methode\_Achiral\_MUC\_Integration.gcm  
Batch Filename : batch.gcb  
Vial # : 1  
Injection Volume : 5 uL  
Date Acquired : 16.08.2019 10:30:49  
Date Processed : 16.08.2019 10:51:32

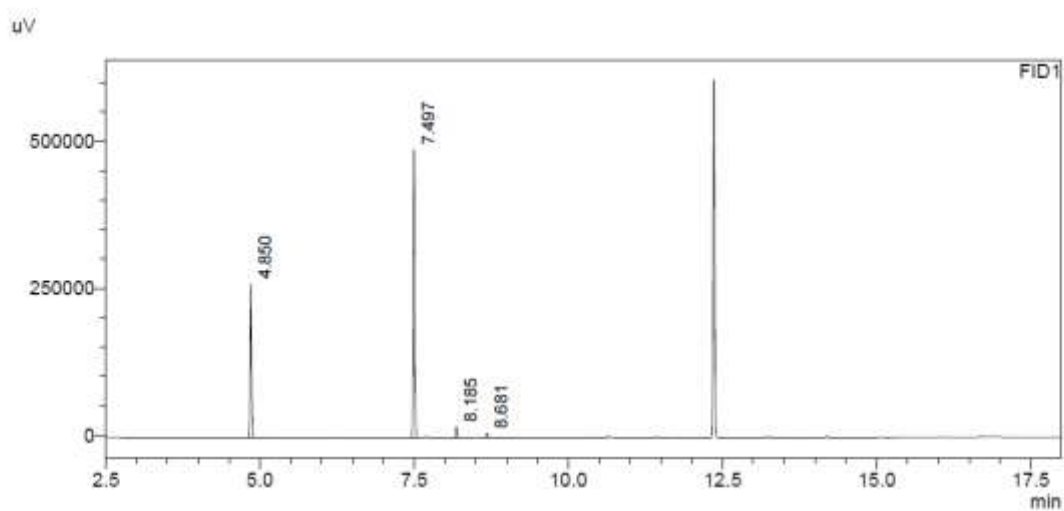

FID1

| Peak# | Ret. Time | Area    | Area%   |
|-------|-----------|---------|---------|
| 1     | 4.850     | 407606  | 34.453  |
| 2     | 7.497     | 734563  | 62.090  |
| 3     | 8.185     | 29225   | 2.470   |
| 4     | 8.681     | 11672   | 0.987   |
| Total |           | 1183066 | 100.000 |

Sample Name : t=48\_SOD\_822  
Sample ID :  
Data Filename : t=48\_SOD\_822.gcd  
Method Filename : Methode\_Achiral\_MUC\_Integration.gcm  
Batch Filename : batch.gcb  
Vial # : 2  
Injection Volume : 5 uL  
Date Acquired : 16.08.2019 10:56:09  
Date Processed : 16.08.2019 11:16:53

uV

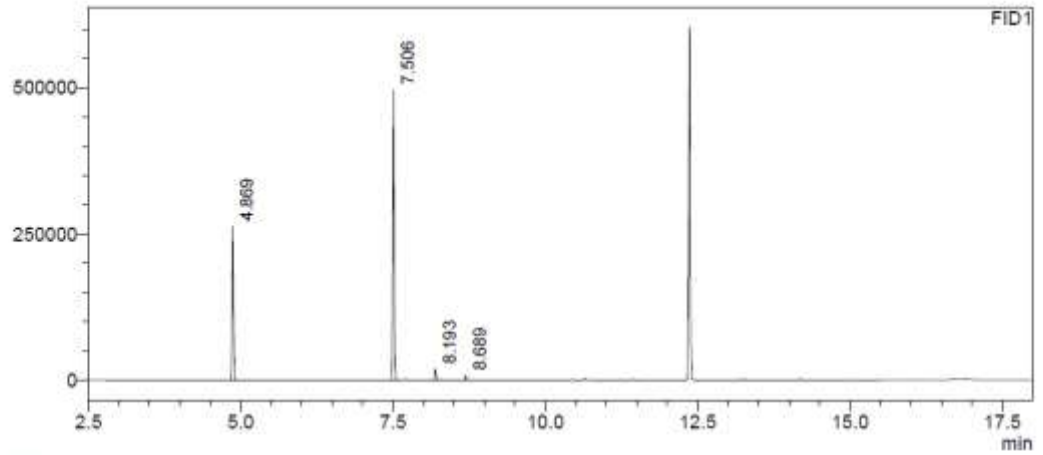

FID1

| Peak# | Ret. Time | Area    | Area%   |
|-------|-----------|---------|---------|
| 1     | 4.869     | 418139  | 34.887  |
| 2     | 7.506     | 737268  | 61.513  |
| 3     | 8.193     | 30207   | 2.520   |
| 4     | 8.689     | 12939   | 1.080   |
| Total |           | 1198552 | 100.000 |

Sample Name : t=48\_SOD\_823  
Sample ID :  
Data Filename : t=48\_SOD\_823.gcd  
Method Filename : Methode\_Achiral\_MUC\_Integration.gcm  
Batch Filename : batch.gcb  
Vial # : 3  
Injection Volume : 5 uL  
Date Acquired : 16.08.2019 11:21:34  
Date Processed : 16.08.2019 11:42:17

uV

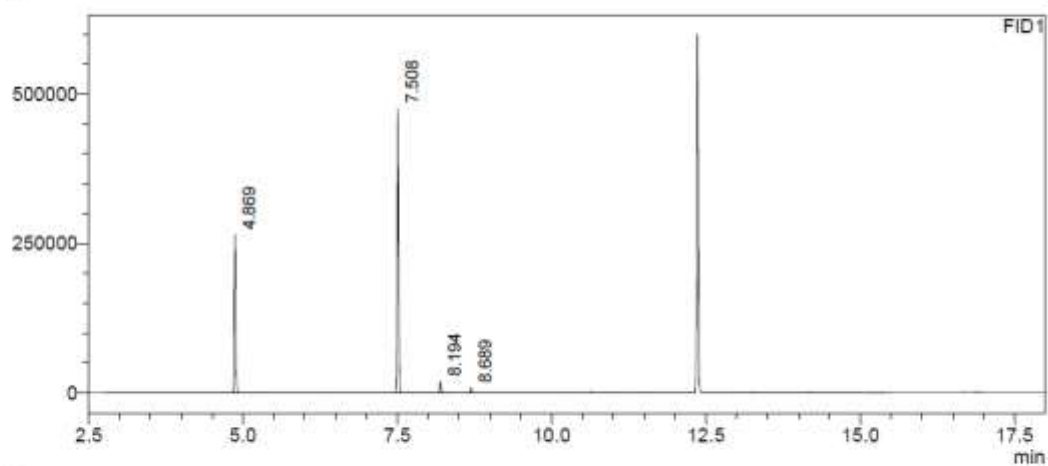

FID1

| Peak# | Ret. Time | Area    | Area%   |
|-------|-----------|---------|---------|
| 1     | 4.869     | 411246  | 35.147  |
| 2     | 7.508     | 714106  | 61.030  |
| 3     | 8.194     | 31706   | 2.710   |
| 4     | 8.689     | 13023   | 1.113   |
| Total |           | 1170081 | 100.000 |



t = 72 h

Sample Name : t=72\_SOD\_821  
Sample ID :  
Data Filename : t=72\_SOD\_821.gcd  
Method Filename : Methode\_Achiral\_MUC\_Integration.gcm  
Batch Filename : batch.gcb  
Vial # : 16  
Injection Volume : 5 uL  
Date Acquired : 16.08.2019 19:52:27  
Date Processed : 16.08.2019 20:13:11

uV

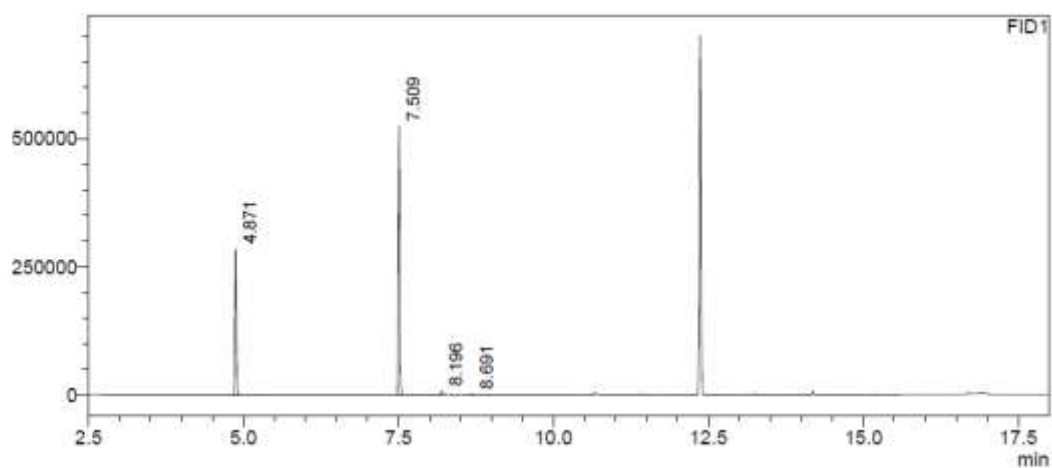

FID1

| Peak# | Ret. Time | Area    | Area%   |
|-------|-----------|---------|---------|
| 1     | 4.871     | 449239  | 35.648  |
| 2     | 7.509     | 797297  | 63.268  |
| 3     | 8.196     | 10135   | 0.804   |
| 4     | 8.691     | 3522    | 0.279   |
| Total |           | 1260193 | 100.000 |

No l, *i*PrOH

t = 0 min

Sample Name : t=0\_SOD-1033  
Sample ID :  
Data Filename : t=0\_SOD-1033.gcd  
Method Filename : Methode\_Achiral\_MUC\_Integration.gcm  
Batch Filename : achiralGC.gcb  
Vial # : 49  
Injection Volume : 5 uL  
Date Acquired : 20.02.2020 13:26:35  
Date Processed : 20.02.2020 13:47:19

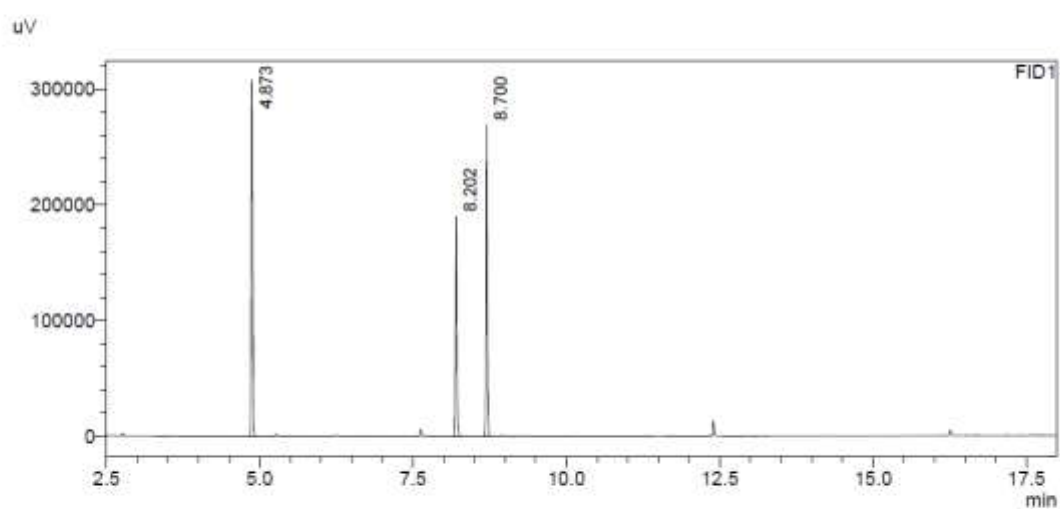

| Peak# | Ret. Time | Area    | Area%   |
|-------|-----------|---------|---------|
| 1     | 4.873     | 480338  | 41.803  |
| 2     | 8.202     | 278997  | 24.281  |
| 3     | 8.700     | 389707  | 33.916  |
| Total |           | 1149043 | 100.000 |

Sample Name : t=0\_SOD-1034  
Sample ID :  
Data Filename : t=0\_SOD-1034.gcd  
Method Filename : Methode\_Achiral\_MUC\_Integration.gcm  
Batch Filename : achiralGC.gcb  
Vial # : 50  
Injection Volume : 5 uL  
Date Acquired : 20.02.2020 13:51:56  
Date Processed : 20.02.2020 14:12:40

uV

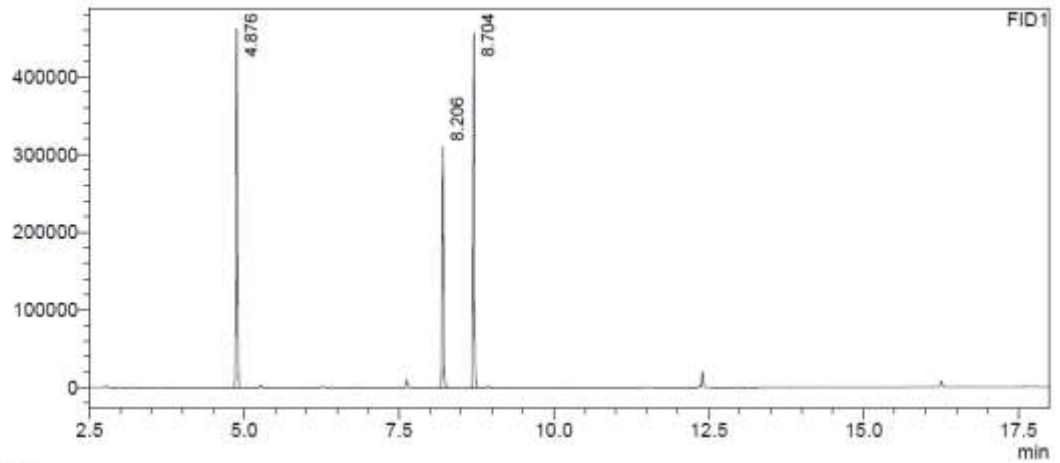

FID1

| Peak# | Ret. Time | Area    | Area%   |
|-------|-----------|---------|---------|
| 1     | 4.876     | 734746  | 39.171  |
| 2     | 8.206     | 462797  | 24.673  |
| 3     | 8.704     | 678217  | 36.157  |
| Total |           | 1875761 | 100.000 |

Sample Name : t=0\_SOD-1035  
Sample ID :  
Data Filename : t=0\_SOD-1035.gcd  
Method Filename : Methode\_Achiral\_MUC\_Integration.gcm  
Batch Filename : achiralGC.gcb  
Vial # : 51  
Injection Volume : 5 uL  
Date Acquired : 20.02.2020 14:17:19  
Date Processed : 20.02.2020 14:38:03

uv

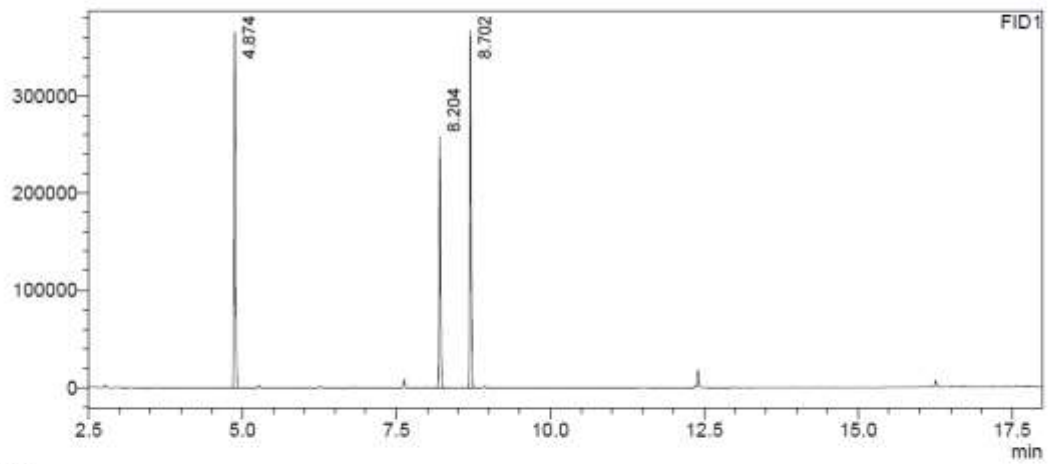

| Peak# | Ret. Time | Area    | Area%   |
|-------|-----------|---------|---------|
| 1     | 4.874     | 591506  | 39.196  |
| 2     | 8.204     | 380962  | 25.244  |
| 3     | 8.702     | 536637  | 35.560  |
| Total |           | 1509104 | 100.000 |

t = 24 h

Sample Name : t=24\_SOD-1033  
Sample ID :  
Data Filename : t=24\_SOD-1033.gcd  
Method Filename : Methode\_Achiral\_MUC\_Integration.gcm  
Batch Filename : achiralGC.gcb  
Vial # : 16  
Injection Volume : 5 uL  
Date Acquired : 21.02.2020 04:39:46  
Date Processed : 21.02.2020 05:00:29

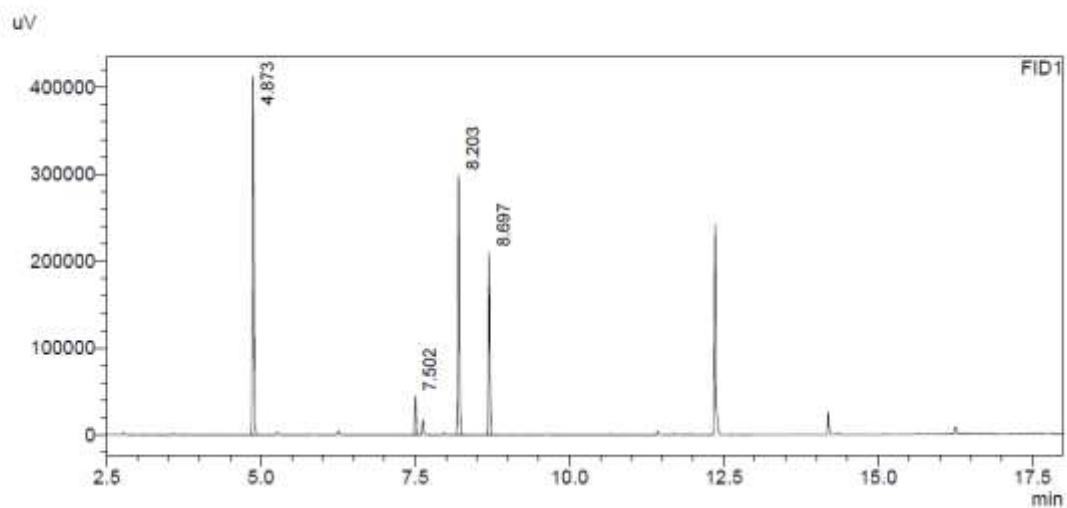

FID1

| Peak# | Ret. Time | Area    | Area%   |
|-------|-----------|---------|---------|
| 1     | 4.873     | 655727  | 44.485  |
| 2     | 7.502     | 64555   | 4.379   |
| 3     | 8.203     | 448110  | 30.400  |
| 4     | 8.697     | 305639  | 20.735  |
| Total |           | 1474031 | 100.000 |

Sample Name : t=24\_SOD-1034  
Sample ID :  
Data Filename : t=24\_SOD-1034.gcd  
Method Filename : Methode\_Achiral\_MUC\_Integration.gcm  
Batch Filename : achiralGC.gcb  
Vial # : 17  
Injection Volume : 5 uL  
Date Acquired : 21.02.2020 05:05:06  
Date Processed : 21.02.2020 05:25:49

uV

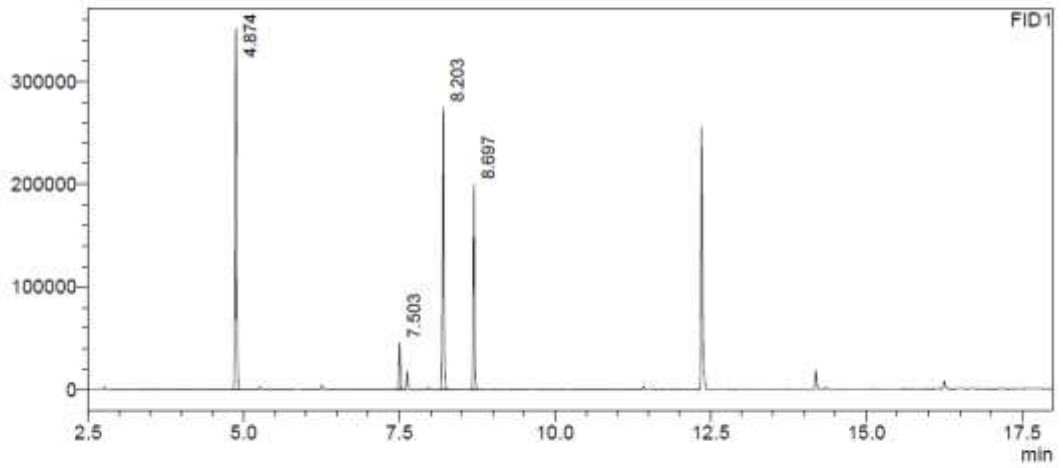

FID1

| Peak# | Ret. Time | Area    | Area%   |
|-------|-----------|---------|---------|
| 1     | 4.874     | 561667  | 42.577  |
| 2     | 7.503     | 66342   | 5.029   |
| 3     | 8.203     | 407108  | 30.861  |
| 4     | 8.697     | 284056  | 21.533  |
| Total |           | 1319172 | 100.000 |

Sample Name : t=24\_SOD-1035  
 Sample ID :  
 Data Filename : t=24\_SOD-1035.gcd  
 Method Filename : Methode\_Achiral\_MUC\_Integration.gcm  
 Batch Filename : achiralGC.gcb  
 Vial # : 18  
 Injection Volume : 5 uL  
 Date Acquired : 21.02.2020 05:30:28  
 Date Processed : 21.02.2020 05:51:11

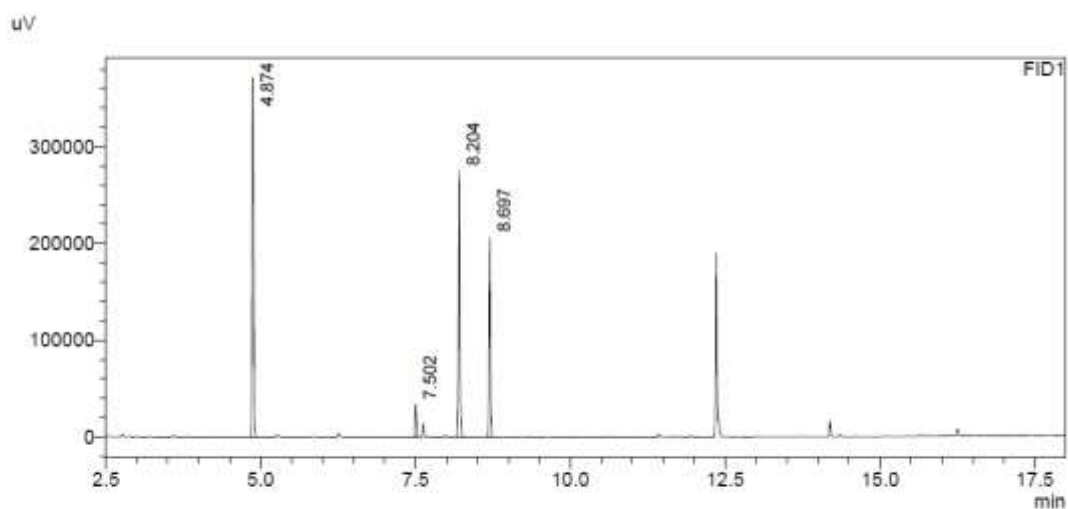

| Peak# | Ret. Time | Area    | Area%   |
|-------|-----------|---------|---------|
| 1     | 4.874     | 592232  | 44.083  |
| 2     | 7.502     | 49492   | 3.684   |
| 3     | 8.204     | 407787  | 30.354  |
| 4     | 8.697     | 293929  | 21.879  |
| Total |           | 1343440 | 100.000 |

t = 48 h

Sample Name : t=48\_SOD-1033  
Sample ID :  
Data Filename : t=48\_SOD-1033.gcd  
Method Filename : Methode\_Achiral\_MUC\_Integration.gcm  
Batch Filename : achiralGC.gcb  
Vial # : 16  
Injection Volume : 5 uL  
Date Acquired : 22.02.2020 01:47:12  
Date Processed : 22.02.2020 02:07:54

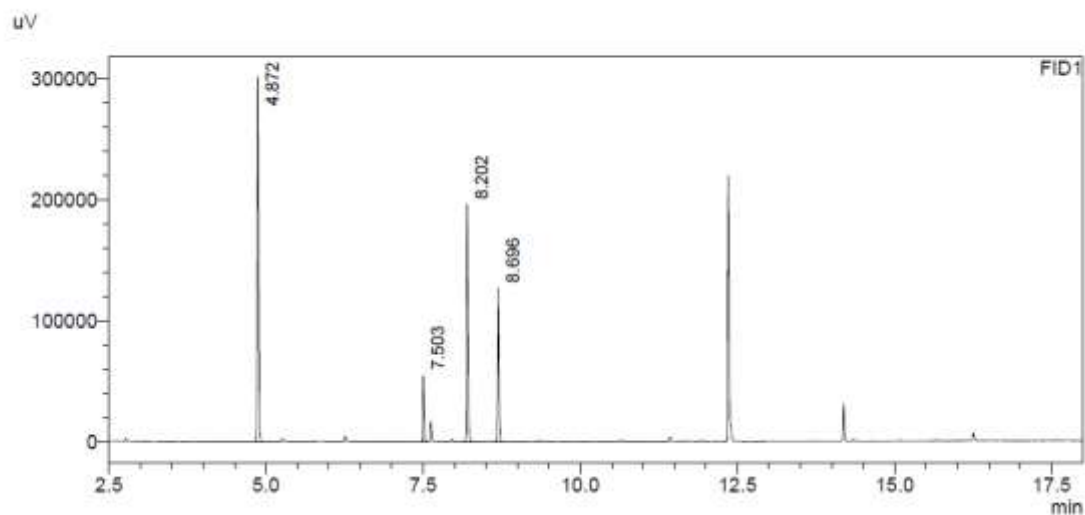

| Peak# | Ret. Time | Area    | Area%   |
|-------|-----------|---------|---------|
| 1     | 4.872     | 479026  | 46.369  |
| 2     | 7.503     | 79939   | 7.738   |
| 3     | 8.202     | 291218  | 28.190  |
| 4     | 8.696     | 182879  | 17.703  |
| Total |           | 1033062 | 100.000 |



Sample Name : t=48\_SOD-1034  
 Sample ID :  
 Data Filename : t=48\_SOD-1034.gcd  
 Method Filename : Methode\_Achiral\_MUC\_Integration.gcm  
 Batch Filename : achiralGC.gcb  
 Vial # : 17  
 Injection Volume : 5 uL  
 Date Acquired : 22.02.2020 02:12:30  
 Date Processed : 22.02.2020 02:33:15

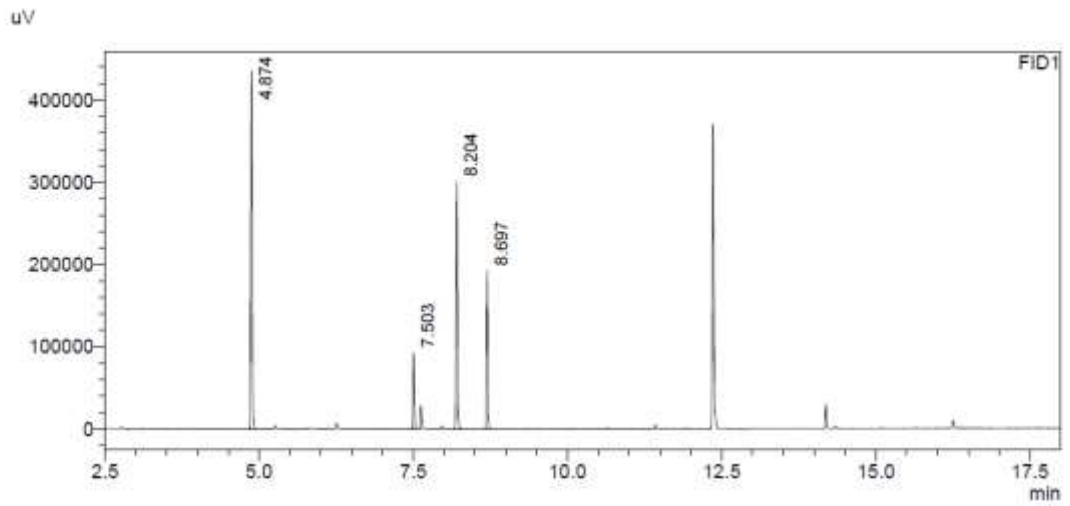

FID1

| Peak# | Ret. Time | Area    | Area%   |
|-------|-----------|---------|---------|
| 1     | 4.874     | 693377  | 44.573  |
| 2     | 7.503     | 134931  | 8.674   |
| 3     | 8.204     | 450112  | 28.935  |
| 4     | 8.697     | 277194  | 17.819  |
| Total |           | 1555614 | 100.000 |

Sample Name : t=48\_SOD-1035  
Sample ID :  
Data Filename : t=48\_SOD-1035.gcd  
Method Filename : Methode\_Achiral\_MUC\_Integration.gcm  
Batch Filename : achiralGC.gcb  
Vial # : 18  
Injection Volume : 5 uL  
Date Acquired : 22.02.2020 02:37:53  
Date Processed : 22.02.2020 02:58:36

uV

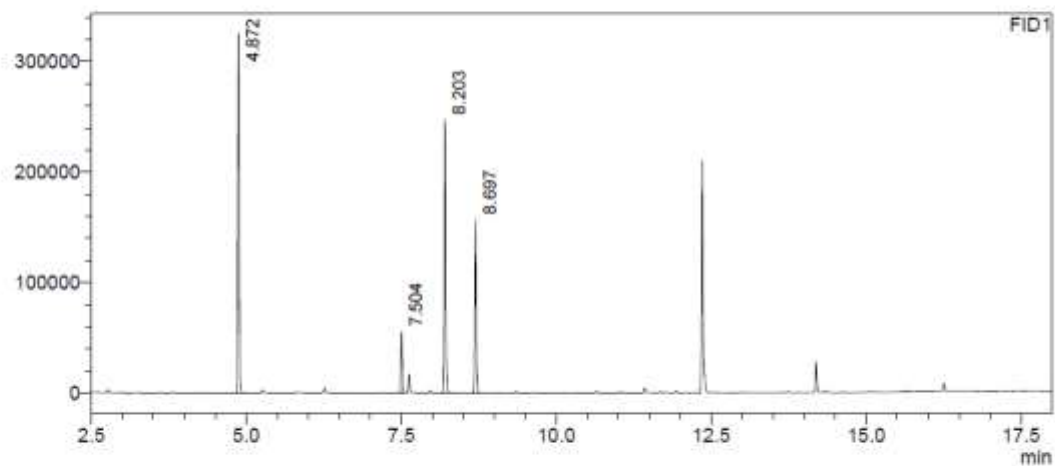

FID1

| Peak# | Ret. Time | Area    | Area%   |
|-------|-----------|---------|---------|
| 1     | 4.872     | 503762  | 42.917  |
| 2     | 7.504     | 81814   | 6.970   |
| 3     | 8.203     | 359570  | 30.633  |
| 4     | 8.697     | 228665  | 19.481  |
| Total |           | 1173811 | 100.000 |

t = 72 h

Sample Name : t=72\_SOD-1033  
Sample ID :  
Data Filename : t=72\_SOD-1033.gcd  
Method Filename : Methode\_Achiral\_MUC\_Integration.gcm  
Batch Filename : achiralGC.gcb  
Vial # : 16  
Injection Volume : 5 uL  
Date Acquired : 27.02.2020 00:22:38  
Date Processed : 27.02.2020 00:43:23

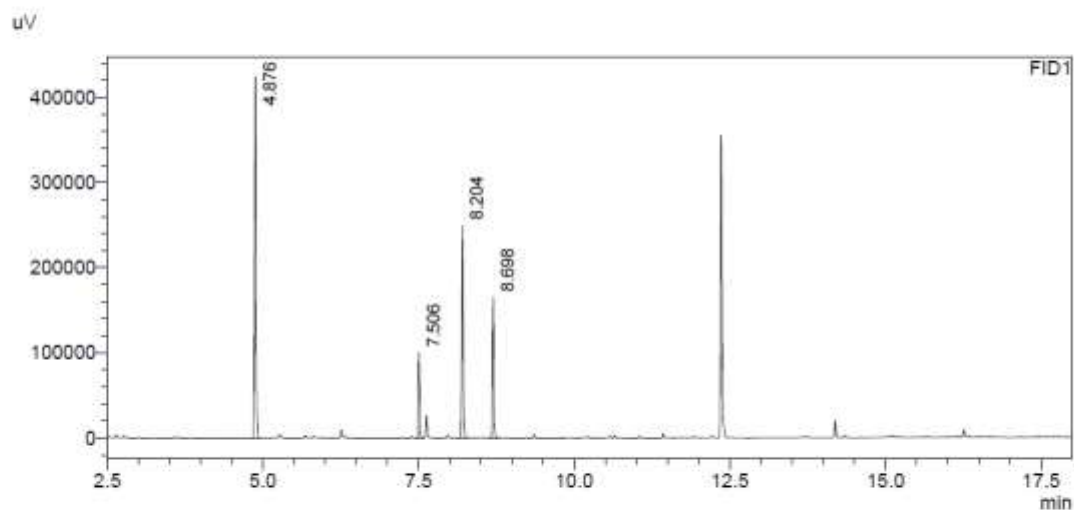

| Peak# | Ret. Time | Area    | Area%   |
|-------|-----------|---------|---------|
| 1     | 4.876     | 671848  | 47.100  |
| 2     | 7.506     | 145554  | 10.204  |
| 3     | 8.204     | 369640  | 25.914  |
| 4     | 8.698     | 239379  | 16.782  |
| Total |           | 1426421 | 100.000 |

Sample Name : t=72\_SOD-1034  
 Sample ID :  
 Data Filename : t=72\_SOD-1034.gcd  
 Method Filename : Methode\_Achiral\_MUC\_Integration.gcm  
 Batch Filename : achiralGC.gcb  
 Vial # : 17  
 Injection Volume : 5 uL  
 Date Acquired : 27.02.2020 00:48:00  
 Date Processed : 27.02.2020 01:08:44

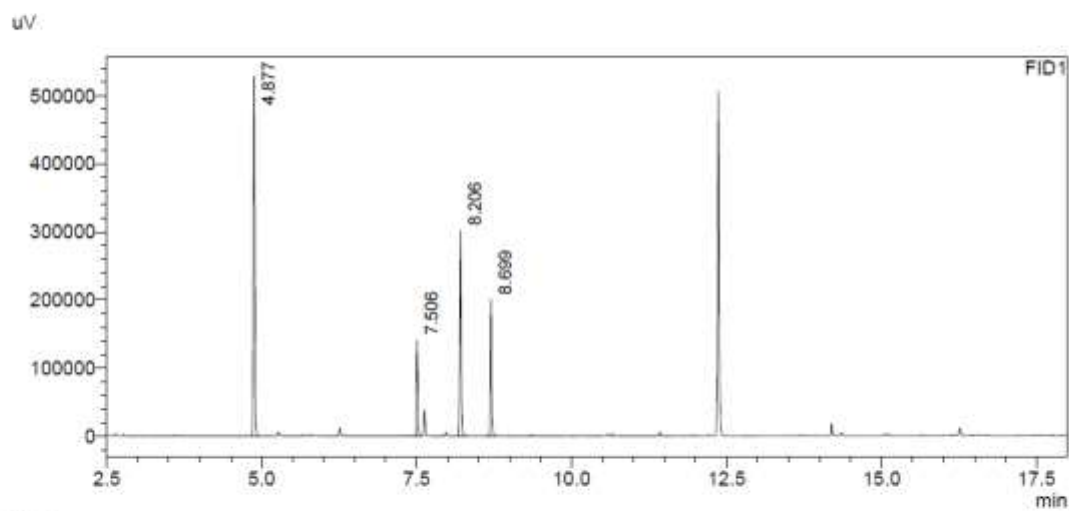

FID1

| Peak# | Ret. Time | Area    | Area%   |
|-------|-----------|---------|---------|
| 1     | 4.877     | 834883  | 46.777  |
| 2     | 7.506     | 203607  | 11.408  |
| 3     | 8.206     | 457159  | 25.614  |
| 4     | 8.699     | 289173  | 16.202  |
| Total |           | 1784823 | 100.000 |

Sample Name : t=72\_SOD-1035  
 Sample ID :  
 Data Filename : t=72\_SOD-1035.gcd  
 Method Filename : Methode\_Achiral\_MUC\_Integration.gcm  
 Batch Filename : achiralGC.gcb  
 Vial # : 18  
 Injection Volume : 5 uL  
 Date Acquired : 27.02.2020 01:13:24  
 Date Processed : 27.02.2020 01:34:07

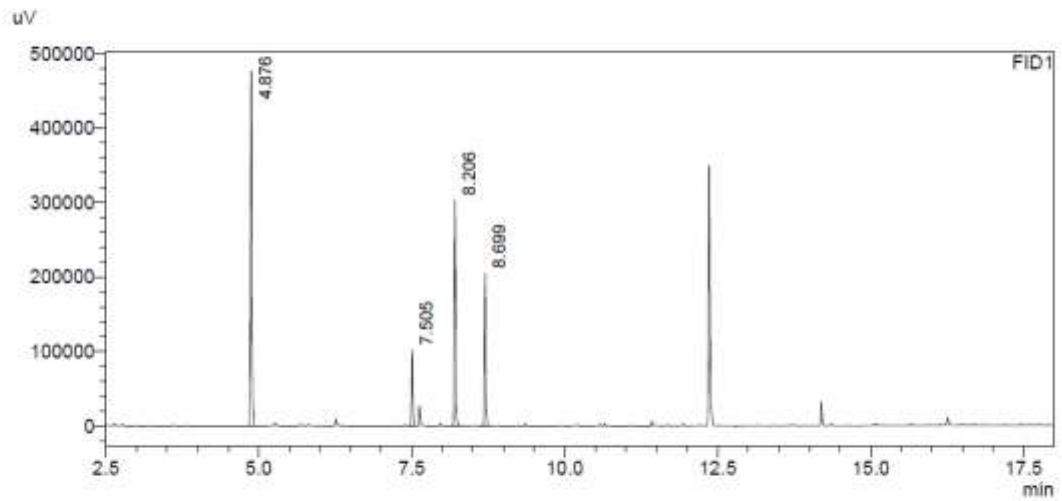

FID1

| Peak# | Ret. Time | Area    | Area%   |
|-------|-----------|---------|---------|
| 1     | 4.876     | 760090  | 45.876  |
| 2     | 7.505     | 147267  | 8.888   |
| 3     | 8.206     | 452064  | 27.285  |
| 4     | 8.699     | 297427  | 17.951  |
| Total |           | 1656849 | 100.000 |

No I, no *i*PrOH

**t = 0 min**

Sample Name : t=0\_SOD-1030  
Sample ID :  
Data Filename : t=0\_SOD-1030.gcd  
Method Filename : Methode\_Achiral\_MUC\_Integration.gcm  
Batch Filename : achiralGC.gcb  
Vial # : 46  
Injection Volume : 5 uL  
Date Acquired : 20.02.2020 12:10:33  
Date Processed : 20.02.2020 12:31:16

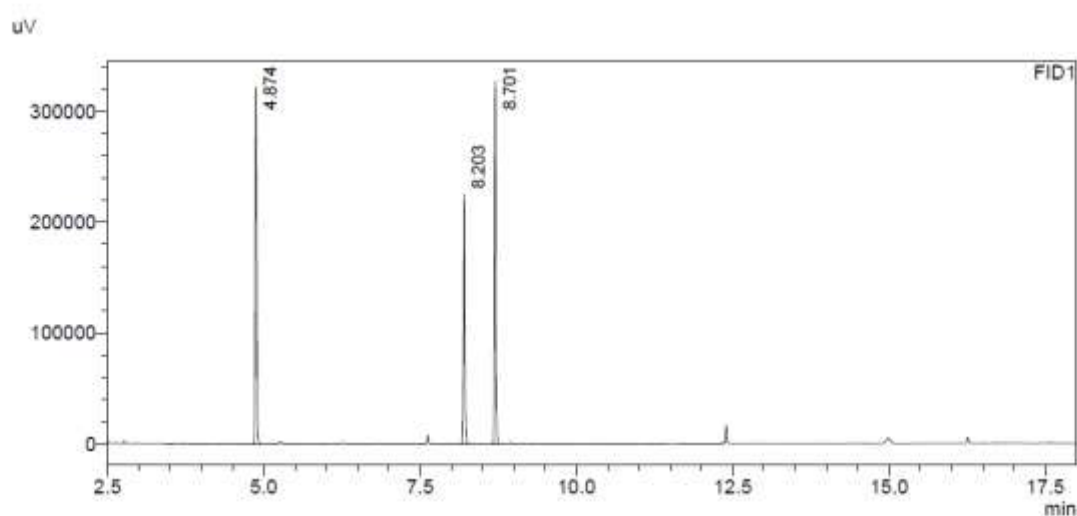

| Peak# | Ret. Time | Area    | Area%   |
|-------|-----------|---------|---------|
| 1     | 4.874     | 505701  | 38.329  |
| 2     | 8.203     | 328994  | 24.936  |
| 3     | 8.701     | 484686  | 36.736  |
| Total |           | 1319381 | 100.000 |

Sample Name : t=0\_SOD-1031  
Sample ID :  
Data Filename : t=0\_SOD-1031.gcd  
Method Filename : Methode\_Achiral\_MUC\_Integration.gcm  
Batch Filename : achiralGC.gcb  
Vial # : 47  
Injection Volume : 5 uL  
Date Acquired : 20.02.2020 12:35:55  
Date Processed : 20.02.2020 12:56:39

uV

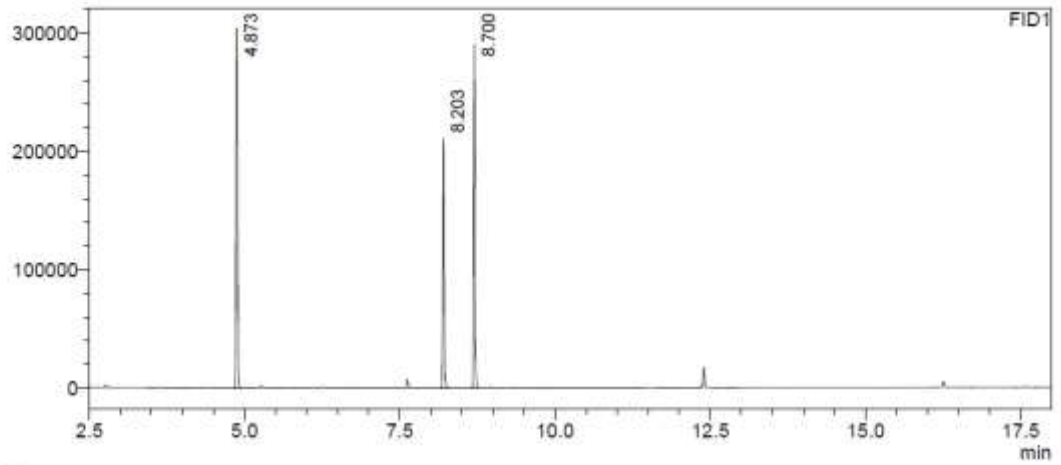

FID1

| Peak# | Ret. Time | Area    | Area%   |
|-------|-----------|---------|---------|
| 1     | 4.873     | 482582  | 39.638  |
| 2     | 8.203     | 308068  | 25.304  |
| 3     | 8.700     | 426816  | 35.058  |
| Total |           | 1217465 | 100.000 |

Sample Name : t=0\_SOD-1032  
Sample ID :  
Data Filename : t=0\_SOD-1032.gcd  
Method Filename : Methode\_Achiral\_MUC\_Integration.gcm  
Batch Filename : achiralGC.gcb  
Vial # : 48  
Injection Volume : 5 uL  
Date Acquired : 20.02.2020 13:01:14  
Date Processed : 20.02.2020 13:22:00

uV

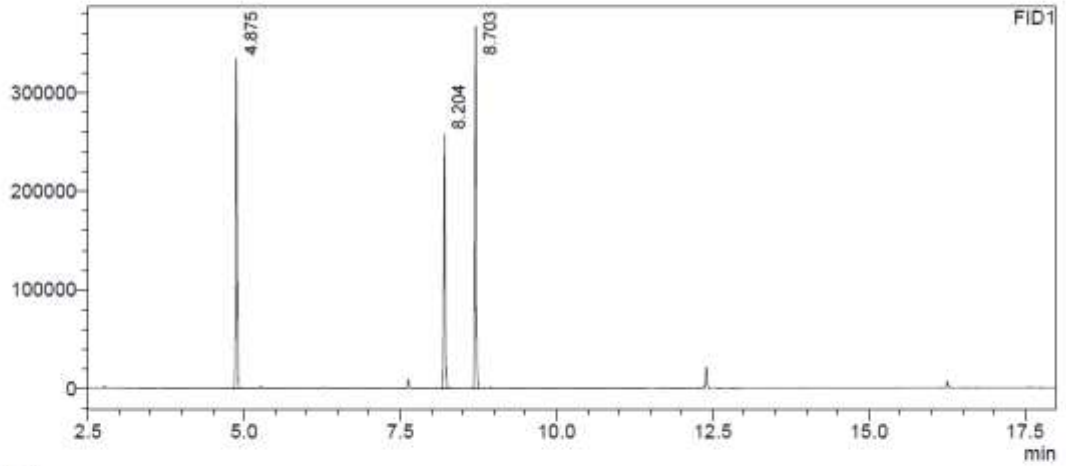

| Peak# | Ret. Time | Area    | Area%   |
|-------|-----------|---------|---------|
| 1     | 4.875     | 524501  | 36.085  |
| 2     | 8.204     | 388667  | 26.740  |
| 3     | 8.703     | 540335  | 37.175  |
| Total |           | 1453504 | 100.000 |



t = 24 h

Sample Name : t=24\_SOD-1030  
Sample ID :  
Data Filename : t=24\_SOD-1030.gcd  
Method Filename : Methode\_Achiral\_MUC\_Integration.gcm  
Batch Filename : achiralGC.gcb  
Vial # : 13  
Injection Volume : 5 uL  
Date Acquired : 21.02.2020 03:23:42  
Date Processed : 21.02.2020 03:44:27

uV

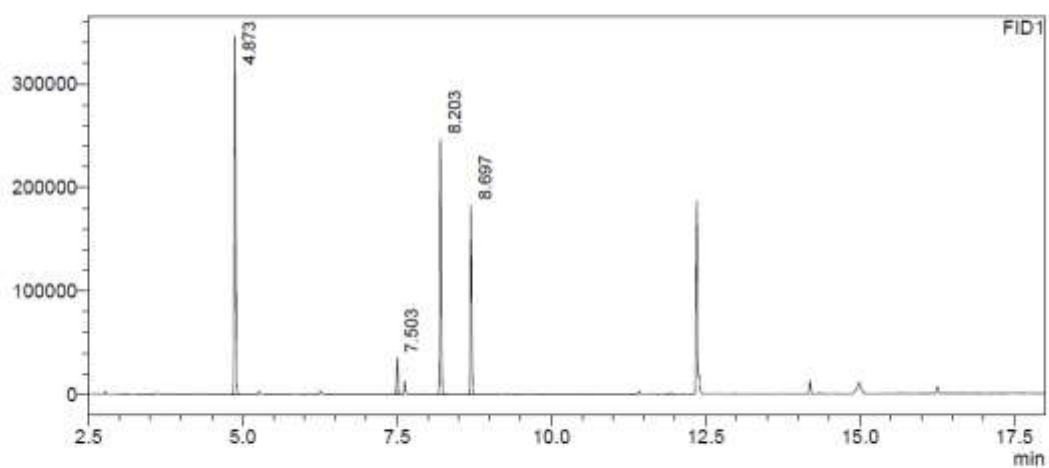

FID1

| Peak# | Ret. Time | Area    | Area%   |
|-------|-----------|---------|---------|
| 1     | 4.873     | 547490  | 44.519  |
| 2     | 7.503     | 51971   | 4.226   |
| 3     | 8.203     | 365246  | 29.700  |
| 4     | 8.697     | 265082  | 21.555  |
| Total |           | 1229788 | 100.000 |

Sample Name : t=24\_SOD-1031  
Sample ID :  
Data Filename : t=24\_SOD-1031.gcd  
Method Filename : Methode\_Achiral\_MUC\_Integration.gcm  
Batch Filename : achiralGC.gcb  
Vial # : 14  
Injection Volume : 5 uL  
Date Acquired : 21.02.2020 03:49:02  
Date Processed : 21.02.2020 04:09:46

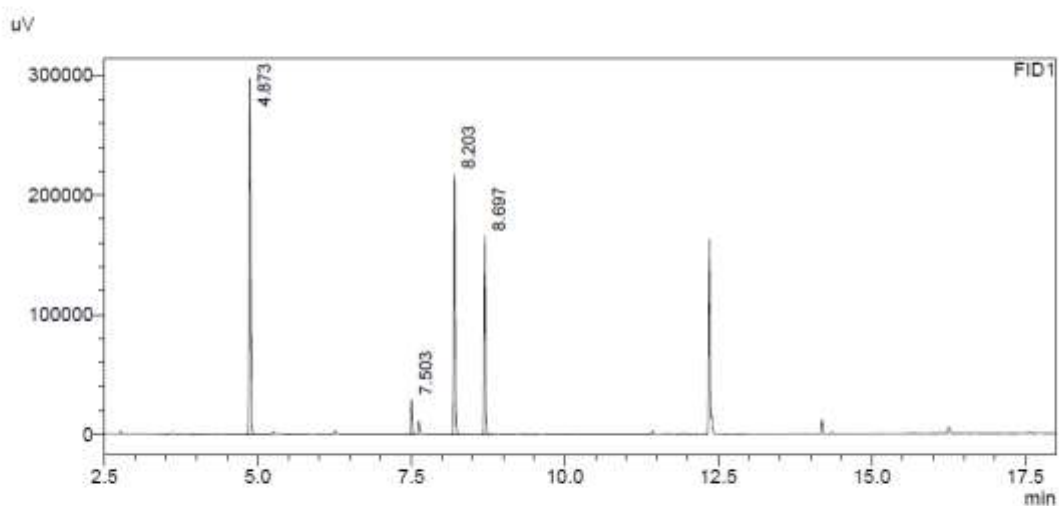

FID1

| Peak# | Ret. Time | Area    | Area%   |
|-------|-----------|---------|---------|
| 1     | 4.873     | 473347  | 43.869  |
| 2     | 7.503     | 42580   | 3.946   |
| 3     | 8.203     | 323141  | 29.948  |
| 4     | 8.697     | 239929  | 22.236  |
| Total |           | 1078997 | 100.000 |

Sample Name : t=24\_SOD-1032  
 Sample ID :  
 Data Filename : t=24\_SOD-1032.gcd  
 Method Filename : Methode\_Achiral\_MUC\_Integration.gcm  
 Batch Filename : achiralGC.gcb  
 Vial # : 15  
 Injection Volume : 5 uL  
 Date Acquired : 21.02.2020 04:14:23  
 Date Processed : 21.02.2020 04:35:07

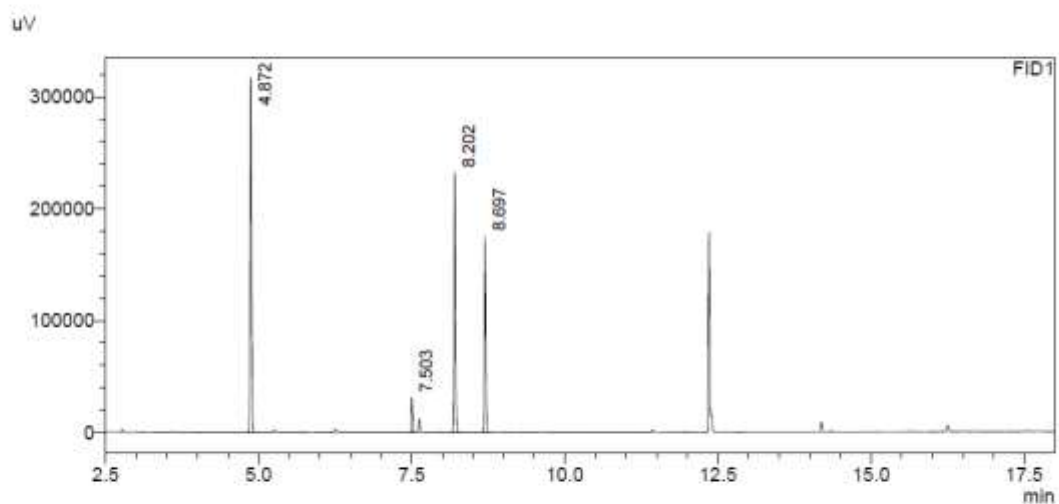

| Peak# | Ret. Time | Area    | Area%   |
|-------|-----------|---------|---------|
| 1     | 4.872     | 495617  | 43.969  |
| 2     | 7.503     | 45552   | 4.041   |
| 3     | 8.202     | 332523  | 29.500  |
| 4     | 8.697     | 253496  | 22.489  |
| Total |           | 1127187 | 100.000 |

t = 48 h

Sample Name : t=48\_SOD-1030  
Sample ID :  
Data Filename : t=48\_SOD-1030.gcd  
Method Filename : Methode\_Achiraj\_MUC\_Integration.gcm  
Batch Filename : achirajGC.gcb  
Vial # : 13  
Injection Volume : 5 uL  
Date Acquired : 22.02.2020 00:31:13  
Date Processed : 22.02.2020 00:51:57

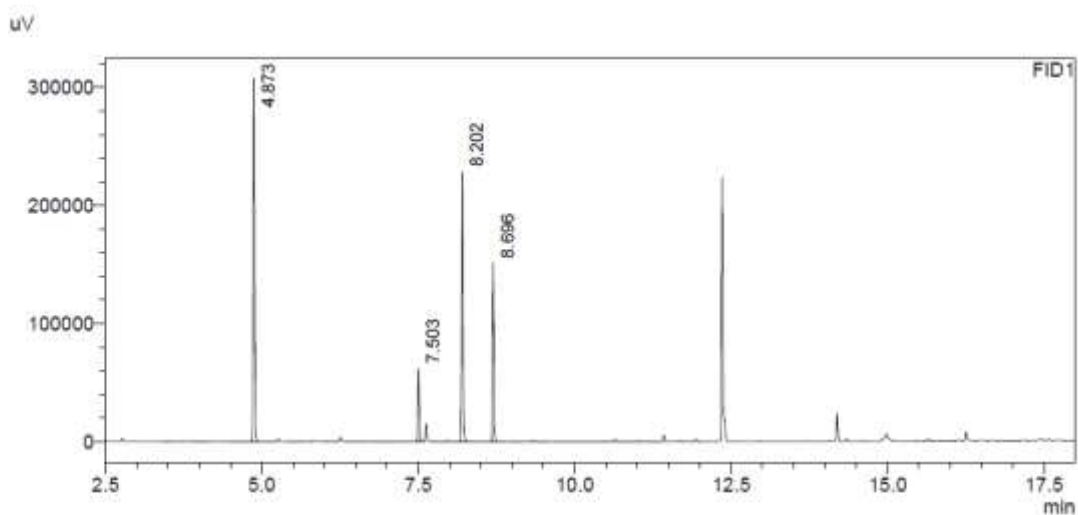

FID1

| Peak# | Ret. Time | Area    | Area%   |
|-------|-----------|---------|---------|
| 1     | 4.873     | 483377  | 42.759  |
| 2     | 7.503     | 90526   | 8.008   |
| 3     | 8.202     | 337534  | 29.858  |
| 4     | 8.696     | 219036  | 19.376  |
| Total |           | 1130473 | 100.000 |

Sample Name : t=48\_SOD-1031  
 Sample ID :  
 Data Filename : t=48\_SOD-1031.gcd  
 Method Filename : Methode\_Achiral\_MUC\_Integration.gcm  
 Batch Filename : achiralGC.gcb  
 Vial # : 14  
 Injection Volume : 5 uL  
 Date Acquired : 22.02.2020 00:56:32  
 Date Processed : 22.02.2020 01:17:14

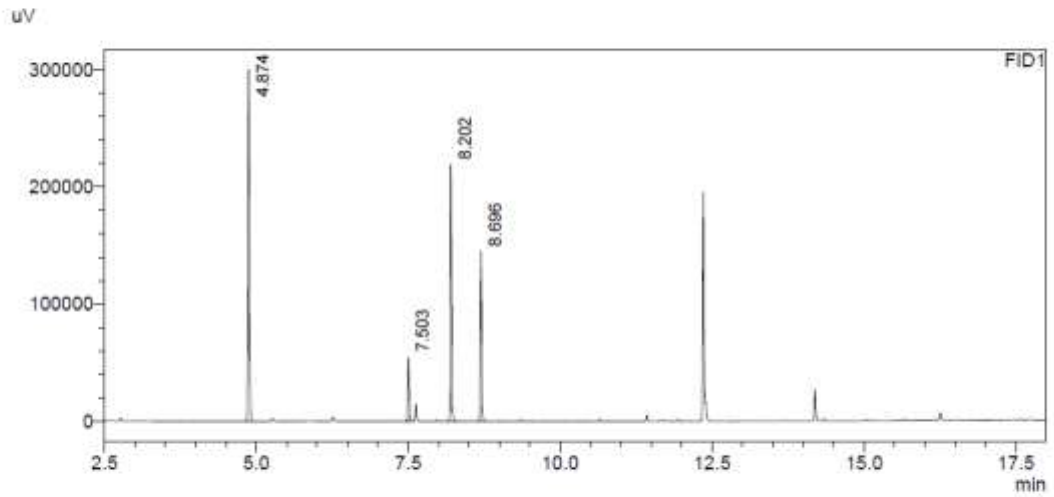

FID1

| Peak# | Ret. Time | Area    | Area%   |
|-------|-----------|---------|---------|
| 1     | 4.874     | 476369  | 43.689  |
| 2     | 7.503     | 80865   | 7.416   |
| 3     | 8.202     | 324465  | 29.757  |
| 4     | 8.696     | 208666  | 19.137  |
| Total |           | 1090365 | 100.000 |

Sample Name : t=48\_SOD-1032  
 Sample ID :  
 Data Filename : t=48\_SOD-1032.gcd  
 Method Filename : Methode\_Achiral\_MUC\_Integration.gcm  
 Batch Filename : achiralGC.gcb  
 Vial # : 15  
 Injection Volume : 5 uL  
 Date Acquired : 22.02.2020 01:21:51  
 Date Processed : 22.02.2020 01:42:36

uV

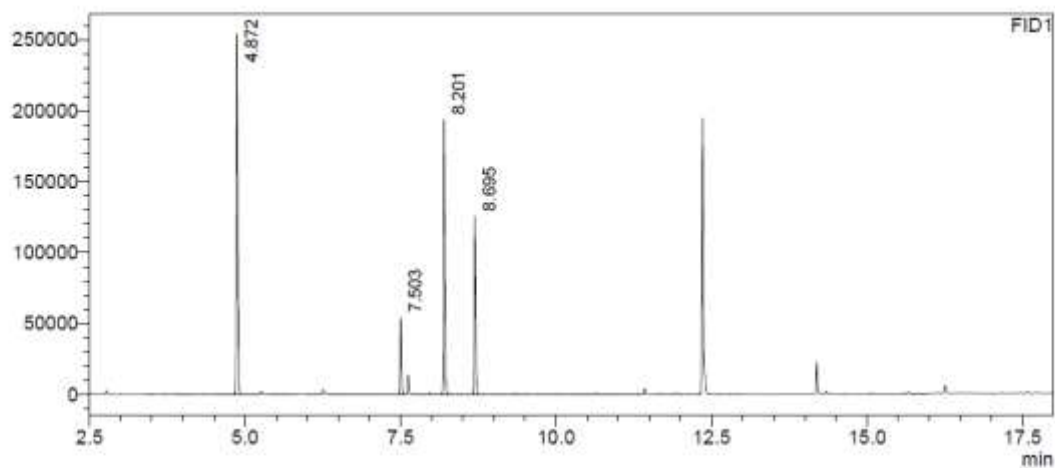

| Peak# | Ret. Time | Area   | Area%   |
|-------|-----------|--------|---------|
| 1     | 4.872     | 399513 | 42.428  |
| 2     | 7.503     | 79410  | 8.433   |
| 3     | 8.201     | 284228 | 30.185  |
| 4     | 8.695     | 178485 | 18.955  |
| Total |           | 941635 | 100.000 |

t = 72 h

Sample Name : t=72\_SOD-1030  
Sample ID :  
Data Filename : t=72\_SOD-1030.gcd  
Method Filename : Methode\_Achiral\_MUC\_Integration.gcm  
Batch Filename : achiralGC.gcb  
Vial # : 13  
Injection Volume : 5 uL  
Date Acquired : 26.02.2020 23:06:31  
Date Processed : 26.02.2020 23:27:15

uV

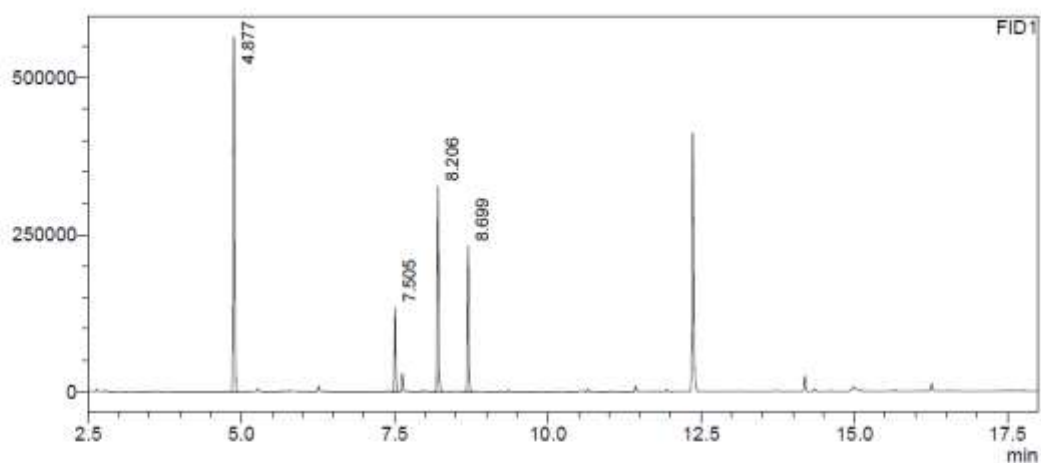

| Peak# | Ret. Time | Area    | Area%   |
|-------|-----------|---------|---------|
| 1     | 4.877     | 892190  | 46.672  |
| 2     | 7.505     | 193979  | 10.147  |
| 3     | 8.206     | 491494  | 25.711  |
| 4     | 8.699     | 333948  | 17.469  |
| Total |           | 1911611 | 100.000 |

Sample Name : t=72\_SOD-1031  
Sample ID :  
Data Filename : t=72\_SOD-1031.gcd  
Method Filename : Methode\_Achiral\_MUC\_Integration.gcm  
Batch Filename : achiralGC.gcb  
Vial # : 14  
Injection Volume : 5 uL  
Date Acquired : 26.02.2020 23:31:54  
Date Processed : 26.02.2020 23:52:38

uV

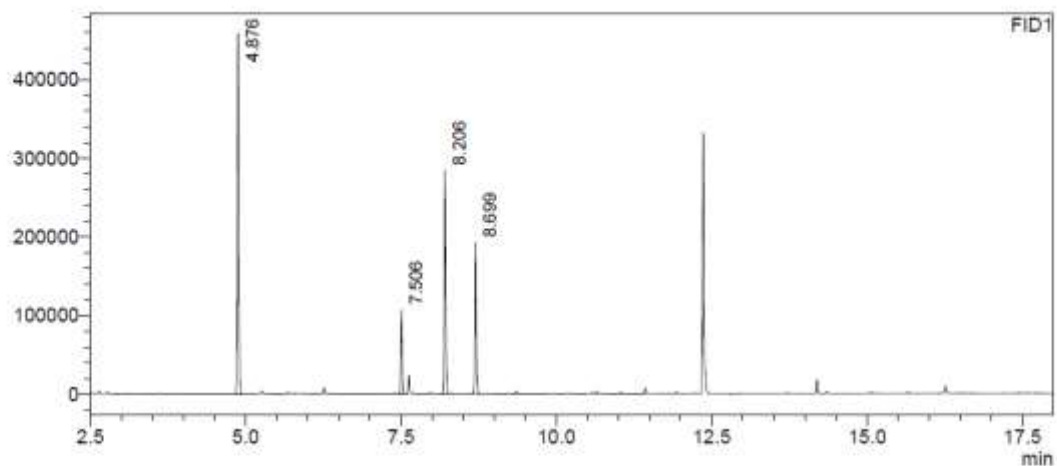

| Peak# | Ret. Time | Area    | Area%   |
|-------|-----------|---------|---------|
| 1     | 4.876     | 721786  | 45.571  |
| 2     | 7.506     | 155372  | 9.810   |
| 3     | 8.206     | 423056  | 26.710  |
| 4     | 8.699     | 283655  | 17.909  |
| Total |           | 1583869 | 100.000 |



Sample Name : t=72\_SOD-1032  
Sample ID :  
Data Filename : t=72\_SOD-1032.gcd  
Method Filename : Methode\_Achiral\_MUC\_Integration.gcm  
Batch Filename : achiralGC.gcb  
Vial # : 15  
Injection Volume : 5 uL  
Date Acquired : 26.02.2020 23:57:16  
Date Processed : 27.02.2020 00:17:59

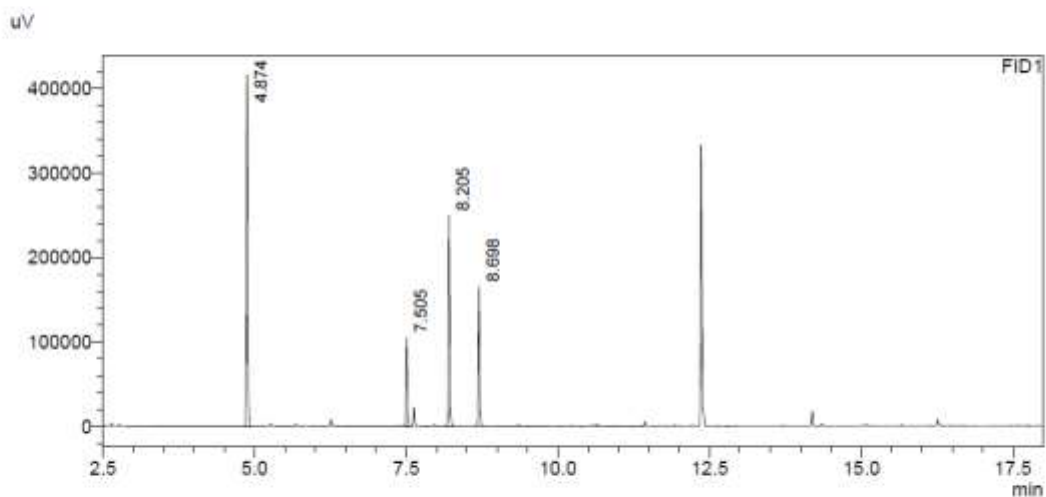

| Peak# | Ret. Time | Area    | Area%   |
|-------|-----------|---------|---------|
| 1     | 4.874     | 642998  | 45.813  |
| 2     | 7.505     | 153747  | 10.954  |
| 3     | 8.205     | 368642  | 26.265  |
| 4     | 8.698     | 238144  | 16.967  |
| Total |           | 1403531 | 100.000 |

## Entry 4

I, *i*PrOH

t = 0 min

Sample Name : t=0\_815-820  
Sample ID :  
Data Filename : t=0\_815-820.gcd  
Method Filename : Methode\_Achiral\_MUC\_Integration.gcm  
Batch Filename : batch.gcb  
Vial # : 2  
Injection Volume : 5 uL  
Date Acquired : 20.08.2019 12:01:36  
Date Processed : 20.08.2019 12:22:19

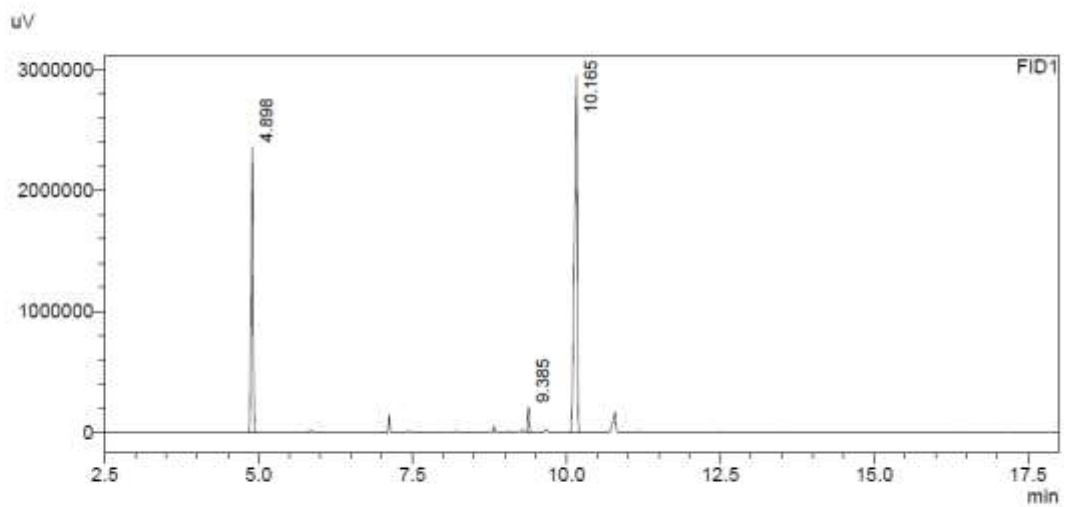

| Peak# | Ret. Time | Area     | Area%   |
|-------|-----------|----------|---------|
| 1     | 4.898     | 4908146  | 34.106  |
| 2     | 9.385     | 401054   | 2.787   |
| 3     | 10.165    | 9081546  | 63.107  |
| Total |           | 14390745 | 100.000 |

t = 24 h

Sample Name : t=24\_SOD\_818  
Sample ID :  
Data Filename : t=24\_SOD\_818.gcd  
Method Filename : Methode\_Achiral\_MUC\_Integration.gcm  
Batch Filename : batch.gcb  
Vial # : 10  
Injection Volume : 5 uL  
Date Acquired : 21.08.2019 16:29:20  
Date Processed : 21.08.2019 16:50:05

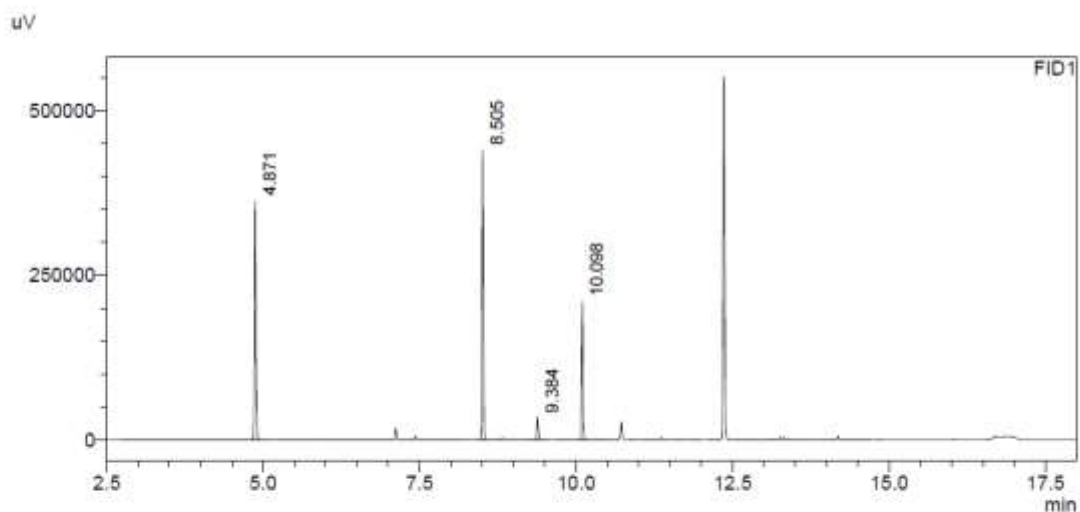

| Peak# | Ret. Time | Area    | Area%   |
|-------|-----------|---------|---------|
| 1     | 4.871     | 571464  | 36.123  |
| 2     | 8.505     | 648839  | 41.014  |
| 3     | 9.384     | 59450   | 3.758   |
| 4     | 10.098    | 302248  | 19.105  |
| Total |           | 1582001 | 100.000 |

Sample Name : t=24\_SOD\_819  
 Sample ID :  
 Data Filename : t=24\_SOD\_819.gcd  
 Method Filename : Methode\_Achiral\_MUC\_Integration.gcm  
 Batch Filename : batch.gcb  
 Vial # : 11  
 Injection Volume : 5 uL  
 Date Acquired : 21.08.2019 16:54:43  
 Date Processed : 21.08.2019 17:15:26

uV

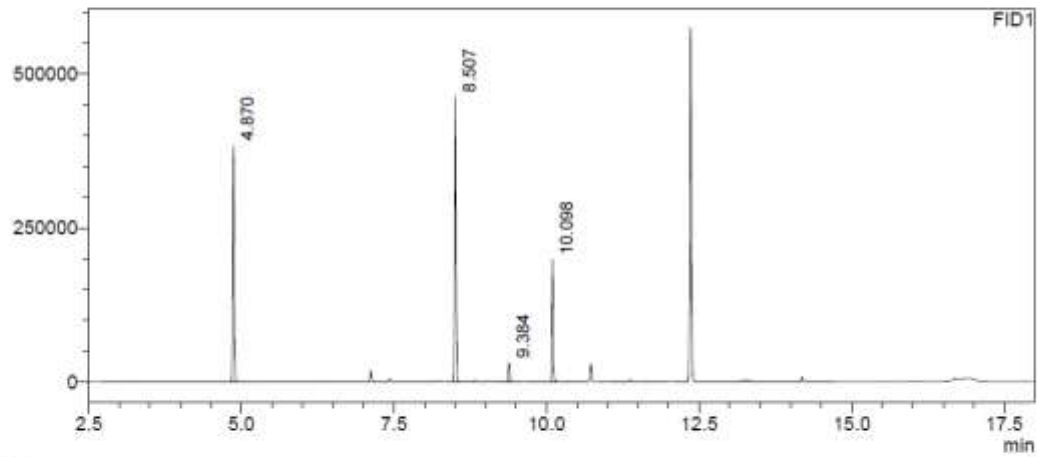

| Peak# | Ret. Time | Area    | Area%   |
|-------|-----------|---------|---------|
| 1     | 4.870     | 600789  | 36.743  |
| 2     | 8.507     | 692170  | 42.332  |
| 3     | 9.384     | 55044   | 3.366   |
| 4     | 10.098    | 287093  | 17.558  |
| Total |           | 1635095 | 100.000 |

Sample Name : t=24\_SOD\_820  
Sample ID :  
Data Filename : t=24\_SOD\_820.gcd  
Method Filename : Methode\_Achiral\_MUC\_Integration.gcm  
Batch Filename : batch.gcb  
Vial # : 12  
Injection Volume : 5 uL  
Date Acquired : 21.08.2019 17:20:05  
Date Processed : 21.08.2019 17:40:47

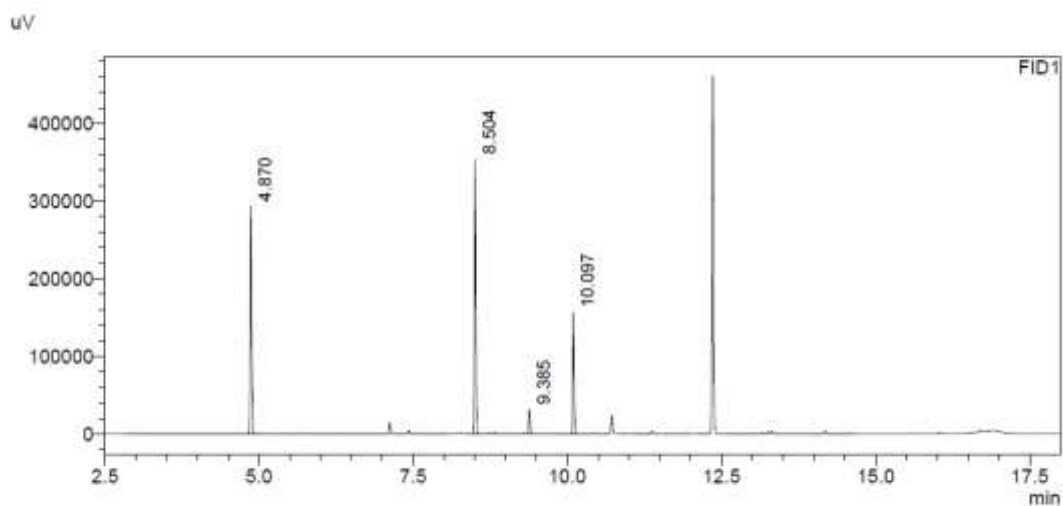

FID1

| Peak# | Ret. Time | Area    | Area%   |
|-------|-----------|---------|---------|
| 1     | 4.870     | 461641  | 36.662  |
| 2     | 8.504     | 517147  | 41.070  |
| 3     | 9.385     | 54066   | 4.294   |
| 4     | 10.097    | 226320  | 17.974  |
| Total |           | 1259175 | 100.000 |

t = 48 h

Sample Name : t=48\_SOD\_818  
Sample ID :  
Data Filename : t=48\_SOD\_818.gcd  
Method Filename : Methode\_Achiral\_MUC\_Integration.gcm  
Batch Filename : batch.gcb  
Vial # : 10  
Injection Volume : 5 uL  
Date Acquired : 22.08.2019 16:40:54  
Date Processed : 22.08.2019 17:01:38

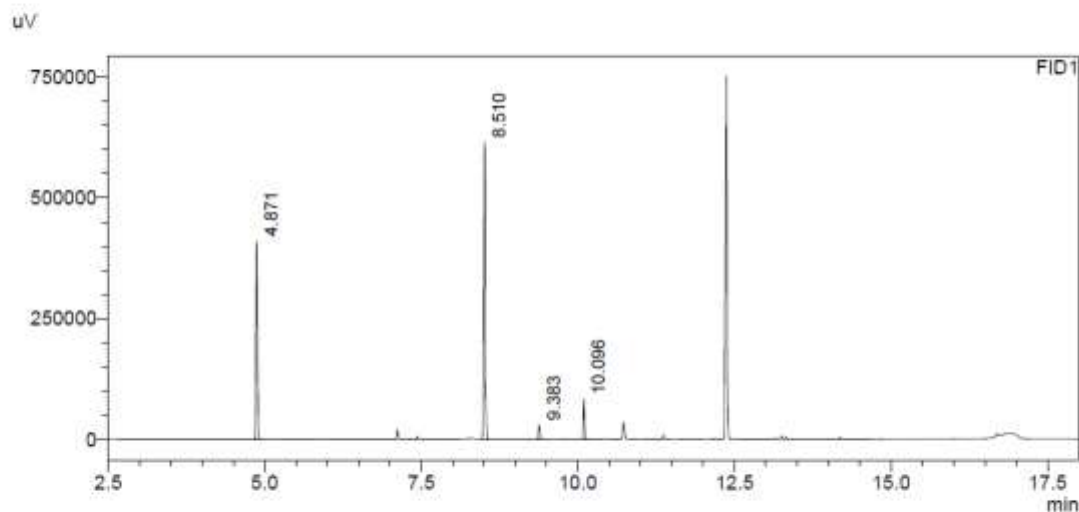

FID1

| Peak# | Ret. Time | Area    | Area%   |
|-------|-----------|---------|---------|
| 1     | 4.871     | 652574  | 36.768  |
| 2     | 8.510     | 947039  | 53.359  |
| 3     | 9.383     | 54567   | 3.074   |
| 4     | 10.096    | 120651  | 6.798   |
| Total |           | 1774831 | 100.000 |

Sample Name : t=48\_SOD\_819  
 Sample ID :  
 Data Filename : t=48\_SOD\_819.gcd  
 Method Filename : Methode\_Achiral\_MUC\_Integration.gcm  
 Batch Filename : batch.gcb  
 Vial # : 11  
 Injection Volume : 5 uL  
 Date Acquired : 22.08.2019 17:06:18  
 Date Processed : 22.08.2019 17:27:02

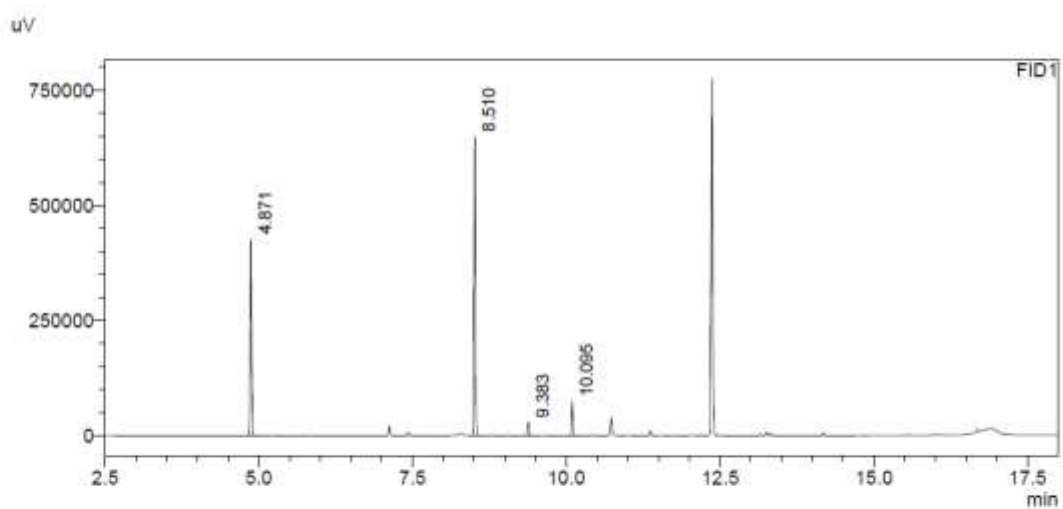

| Peak# | Ret. Time | Area    | Area%   |
|-------|-----------|---------|---------|
| 1     | 4.871     | 678727  | 37.133  |
| 2     | 8.510     | 990340  | 54.181  |
| 3     | 9.383     | 52996   | 2.899   |
| 4     | 10.095    | 105772  | 5.787   |
| Total |           | 1827835 | 100.000 |

Sample Name : t=48\_SOD\_820  
Sample ID :  
Data Filename : t=48\_SOD\_820.gcd  
Method Filename : Methode\_Achiral\_MUC\_Integration.gcm  
Batch Filename : batch.gcb  
Vial # : 12  
Injection Volume : 5 uL  
Date Acquired : 22.08.2019 17:31:43  
Date Processed : 22.08.2019 17:52:27

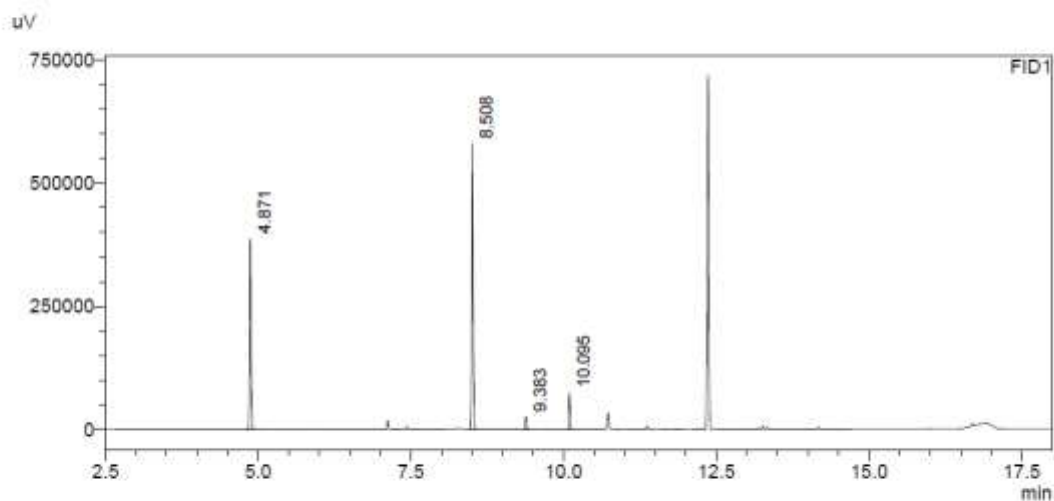

FID1

| Peak# | Ret. Time | Area    | Area%   |
|-------|-----------|---------|---------|
| 1     | 4.871     | 608486  | 36.996  |
| 2     | 8.508     | 877311  | 53.341  |
| 3     | 9.383     | 49722   | 3.023   |
| 4     | 10.095    | 109201  | 6.639   |
| Total |           | 1644721 | 100.000 |



t = 72 h

Sample Name : t=72\_SOD\_818  
Sample ID :  
Data Filename : t=72\_SOD\_818.gcd  
Method Filename : Methode\_Achiral\_MUC\_Integration.gcm  
Batch Filename : batch.gcb  
Vial # : 10  
Injection Volume : 5 uL  
Date Acquired : 23.08.2019 20:26:27  
Date Processed : 23.08.2019 20:47:12

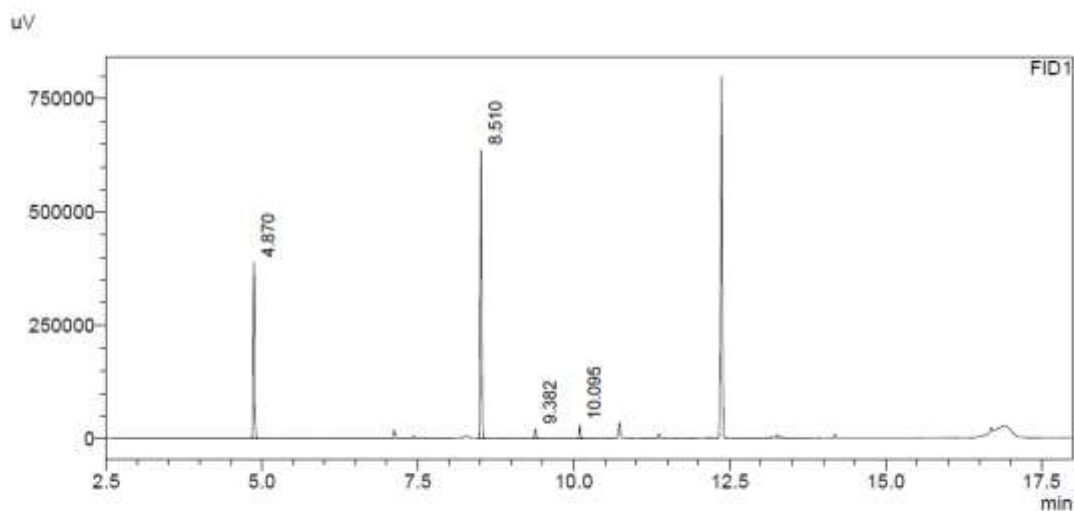

| Peak# | Ret. Time | Area    | Area%   |
|-------|-----------|---------|---------|
| 1     | 4.870     | 617666  | 36.828  |
| 2     | 8.510     | 973192  | 58.026  |
| 3     | 9.382     | 41698   | 2.486   |
| 4     | 10.095    | 44596   | 2.659   |
| Total |           | 1677152 | 100.000 |

Sample Name : t=72\_SOD\_819  
Sample ID :  
Data Filename : t=72\_SOD\_819.gcd  
Method Filename : Methode\_Achiral\_MUC\_Integration.gcm  
Batch Filename : batch.gcb  
Vial # : 11  
Injection Volume : 5 uL  
Date Acquired : 23.08.2019 20:51:50  
Date Processed : 23.08.2019 21:12:35

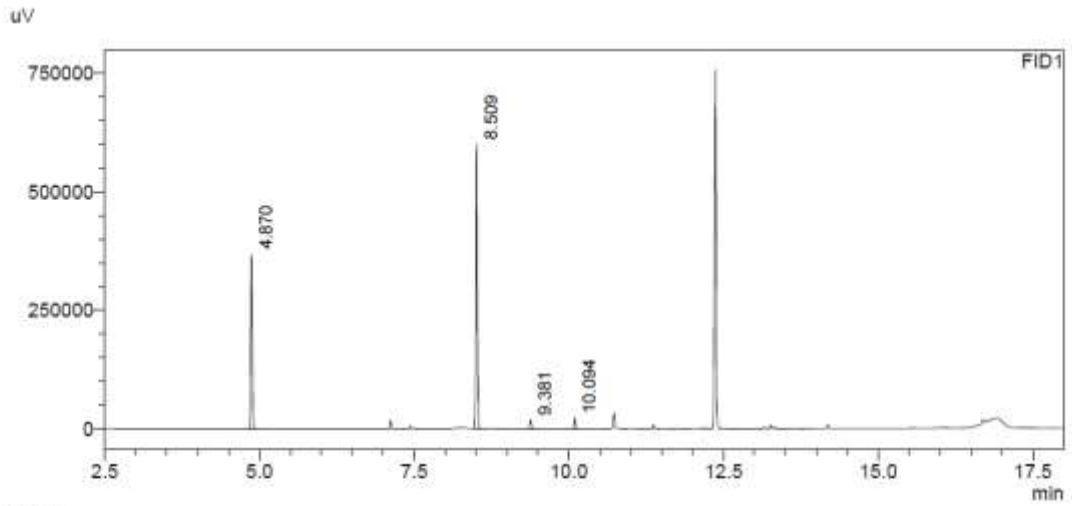

FID1

| Peak# | Ret. Time | Area    | Area%   |
|-------|-----------|---------|---------|
| 1     | 4.870     | 585981  | 36.941  |
| 2     | 8.509     | 928046  | 58.506  |
| 3     | 9.381     | 37236   | 2.347   |
| 4     | 10.094    | 34981   | 2.205   |
| Total |           | 1586244 | 100.000 |

Sample Name : t=72\_SOD\_820  
Sample ID :  
Data Filename : t=72\_SOD\_820.gcd  
Method Filename : Methode\_Achiral\_MUC\_Integration.gcm  
Batch Filename : batch.gcb  
Vial # : 12  
Injection Volume : 5 uL  
Date Acquired : 23.08.2019 21:17:16  
Date Processed : 23.08.2019 21:38:00

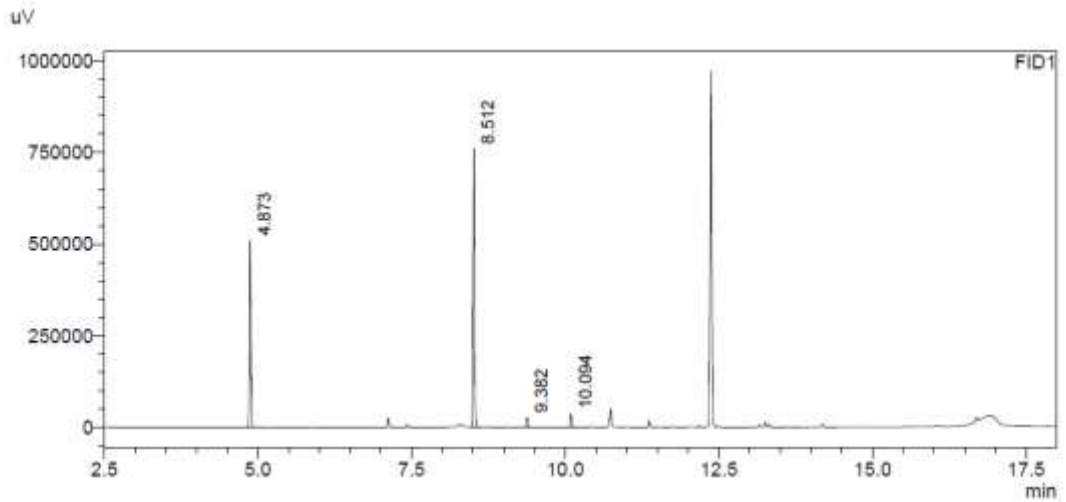

FID1

| Peak# | Ret. Time | Area    | Area%   |
|-------|-----------|---------|---------|
| 1     | 4.873     | 804695  | 37.913  |
| 2     | 8.512     | 1208366 | 56.932  |
| 3     | 9.382     | 53579   | 2.524   |
| 4     | 10.094    | 55814   | 2.630   |
| Total |           | 2122454 | 100.000 |

I, no *i*PrOH

t = 0 min

Sample Name : t=0\_815-820  
Sample ID :  
Data Filename : t=0\_815-820.gcd  
Method Filename : Methode\_Achiral\_MUC\_Integration.gcm  
Batch Filename : batch.gcb  
Vial # : 2  
Injection Volume : 5 uL  
Date Acquired : 20.08.2019 12:01:36  
Date Processed : 20.08.2019 12:22:19

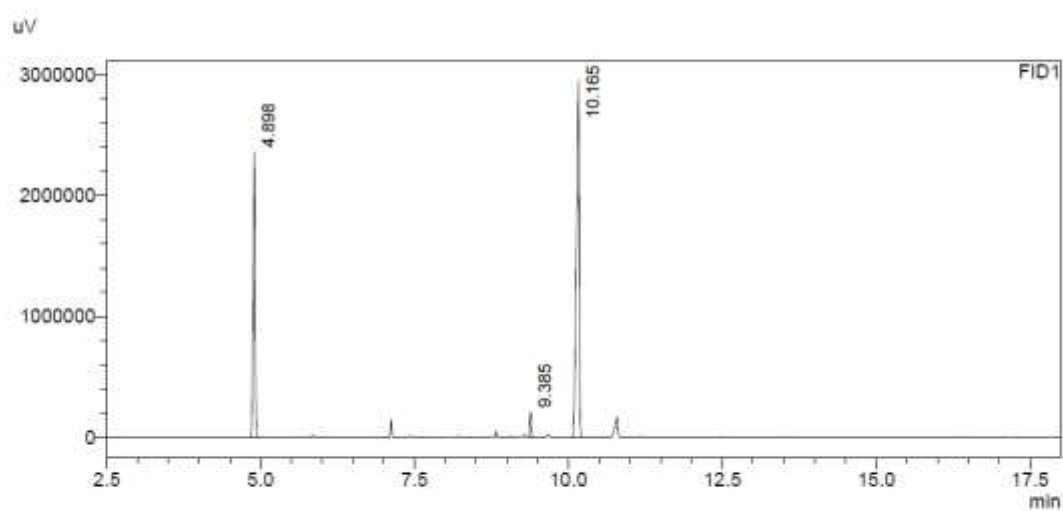

| Peak# | Ret. Time | Area     | Area%   |
|-------|-----------|----------|---------|
| 1     | 4.898     | 4908146  | 34.106  |
| 2     | 9.385     | 401054   | 2.787   |
| 3     | 10.165    | 9081546  | 63.107  |
| Total |           | 14390745 | 100.000 |

t = 24 h

Sample Name : t=24\_SOD\_815  
Sample ID :  
Data Filename : t=24\_SOD\_815.gcd  
Method Filename : Methode\_Achiral\_MUC\_Integration.gcm  
Batch Filename : batch.gcb  
Vial # : 7  
Injection Volume : 5 uL  
Date Acquired : 21.08.2019 15:13:19  
Date Processed : 21.08.2019 15:34:02

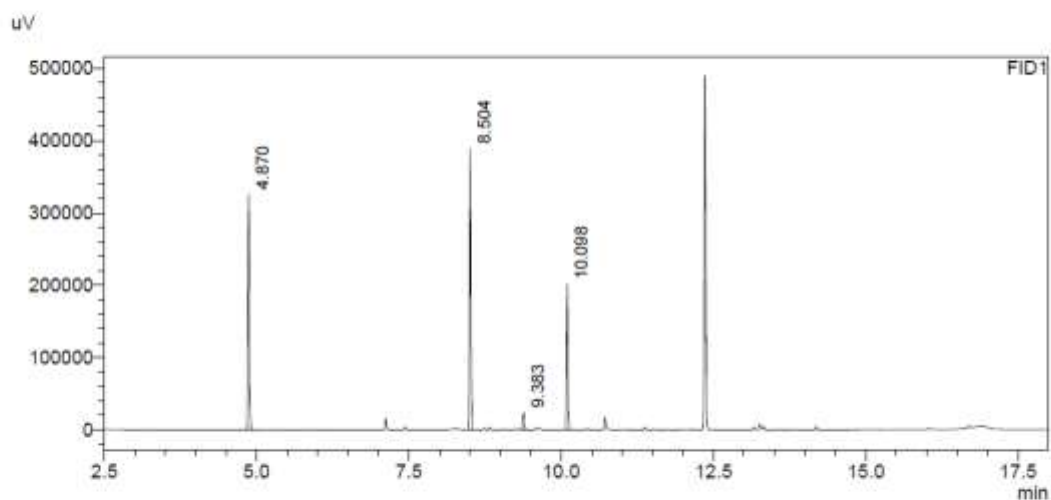

| Peak# | Ret. Time | Area    | Area%   |
|-------|-----------|---------|---------|
| 1     | 4.870     | 513114  | 36.496  |
| 2     | 8.504     | 559336  | 39.784  |
| 3     | 9.383     | 43017   | 3.060   |
| 4     | 10.098    | 290466  | 20.660  |
| Total |           | 1405933 | 100.000 |

Sample Name : t=24\_SOD\_816  
Sample ID :  
Data Filename : t=24\_SOD\_816.gcd  
Method Filename : Methode\_Achiral\_MUC\_Integration.gcm  
Batch Filename : batch.gcb  
Vial # : 8  
Injection Volume : 5 uL  
Date Acquired : 21.08.2019 15:38:41  
Date Processed : 21.08.2019 15:59:27

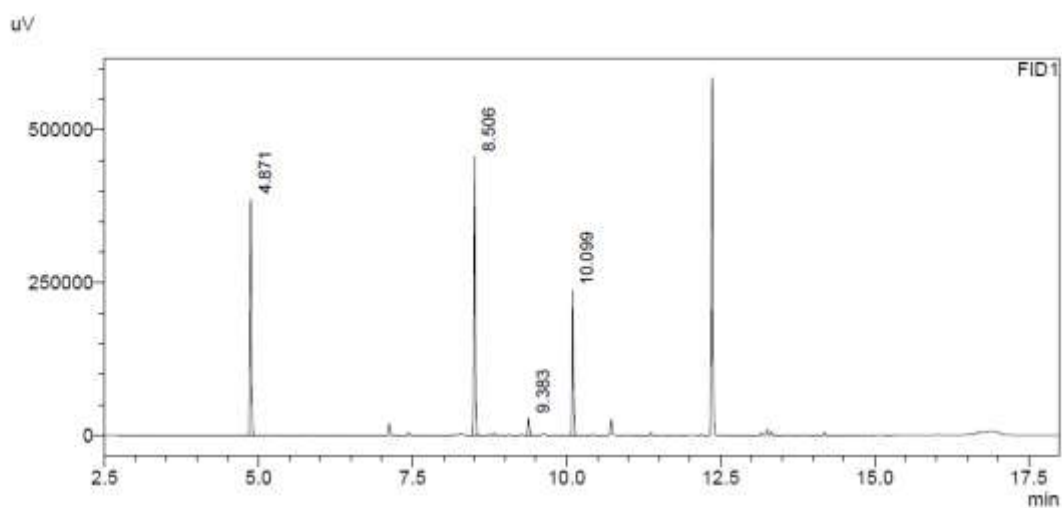

FID1

| Peak# | Ret. Time | Area    | Area%   |
|-------|-----------|---------|---------|
| 1     | 4.871     | 613448  | 36.427  |
| 2     | 8.506     | 677126  | 40.208  |
| 3     | 9.383     | 52015   | 3.089   |
| 4     | 10.099    | 341476  | 20.277  |
| Total |           | 1684065 | 100.000 |

Sample Name : t=24\_SOD\_817  
Sample ID :  
Data Filename : t=24\_SOD\_817.gcd  
Method Filename : Methode\_Achiral\_MUC\_Integration.gcm  
Batch Filename : batch.gcb  
Vial # : 9  
Injection Volume : 5 uL  
Date Acquired : 21.08.2019 16:03:59  
Date Processed : 21.08.2019 16:24:43

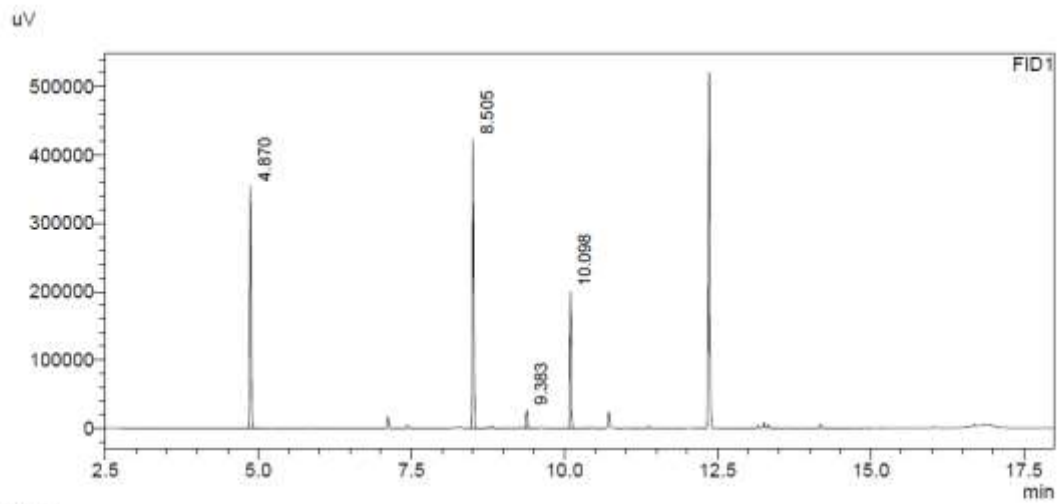

FID1

| Peak# | Ret. Time | Area    | Area%   |
|-------|-----------|---------|---------|
| 1     | 4.870     | 549943  | 36.478  |
| 2     | 8.505     | 619445  | 41.088  |
| 3     | 9.383     | 47691   | 3.163   |
| 4     | 10.098    | 290524  | 19.271  |
| Total |           | 1507603 | 100.000 |

t = 48 h

Sample Name : t=48\_SOD\_815  
Sample ID :  
Data Filename : t=48\_SOD\_815.gcd  
Method Filename : Methode\_Achiral\_MUC\_Integration.gcm  
Batch Filename : batch.gcb  
Vial # : 7  
Injection Volume : 5 uL  
Date Acquired : 22.08.2019 15:24:44  
Date Processed : 22.08.2019 15:45:28

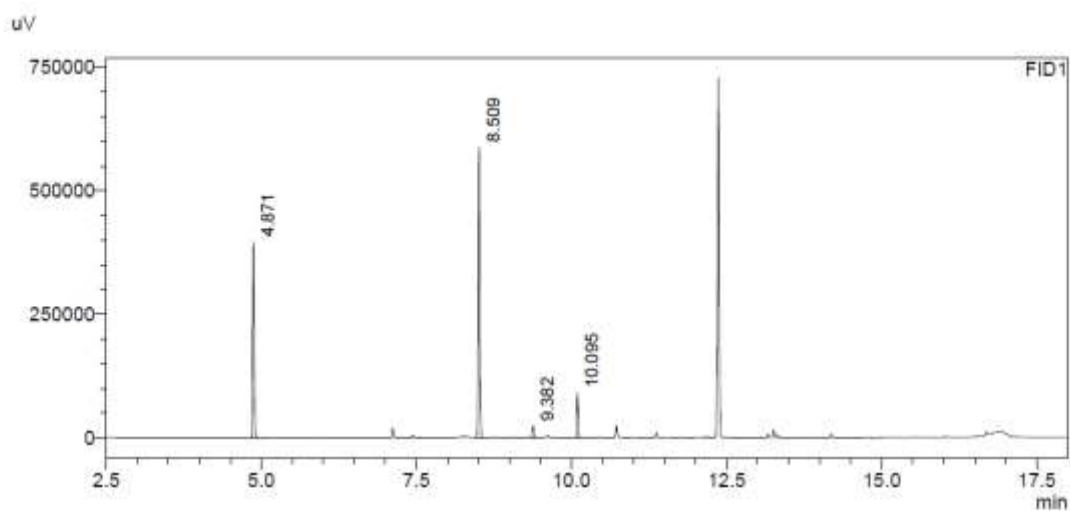

FID1

| Peak# | Ret. Time | Area    | Area%   |
|-------|-----------|---------|---------|
| 1     | 4.871     | 625567  | 36.850  |
| 2     | 8.509     | 894998  | 52.721  |
| 3     | 9.382     | 44313   | 2.610   |
| 4     | 10.095    | 132724  | 7.818   |
| Total |           | 1697603 | 100.000 |



Sample Name : t=48\_SOD\_816  
Sample ID :  
Data Filename : t=48\_SOD\_816.gcd  
Method Filename : Methode\_Achiral\_MUC\_Integration.gcm  
Batch Filename : batch.gcb  
Vial # : 8  
Injection Volume : 5 uL  
Date Acquired : 22.08.2019 15:50:06  
Date Processed : 22.08.2019 16:10:50

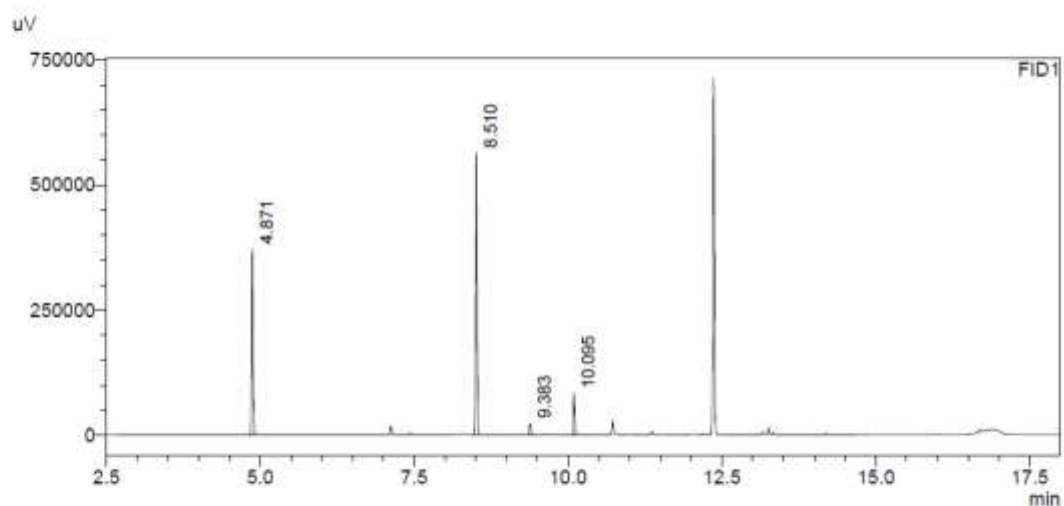

FID1

| Peak# | Ret. Time | Area    | Area%   |
|-------|-----------|---------|---------|
| 1     | 4.871     | 590397  | 36.528  |
| 2     | 8.510     | 861898  | 53.326  |
| 3     | 9.383     | 43094   | 2.666   |
| 4     | 10.095    | 120880  | 7.479   |
| Total |           | 1616270 | 100.000 |

Sample Name : t=48\_SOD\_817  
Sample ID :  
Data Filename : t=48\_SOD\_817.gcd  
Method Filename : Methode\_Achiral\_MUC\_Integration.gcm  
Batch Filename : batch.gcb  
Vial # : 9  
Injection Volume : 5 uL  
Date Acquired : 22.08.2019 16:15:31  
Date Processed : 22.08.2019 16:36:15

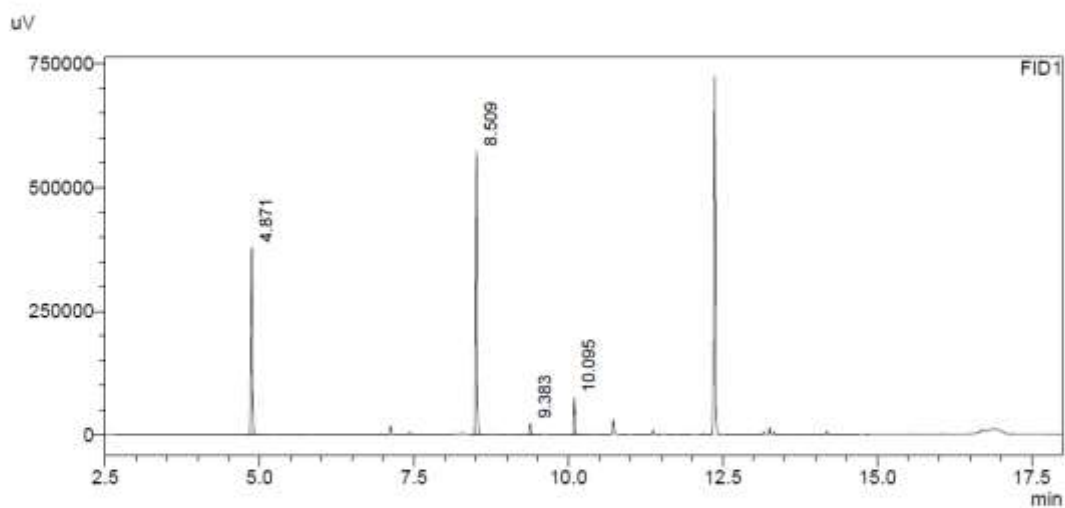

| Peak# | Ret. Time | Area    | Area%   |
|-------|-----------|---------|---------|
| 1     | 4.871     | 603225  | 36.952  |
| 2     | 8.509     | 877044  | 53.725  |
| 3     | 9.383     | 43030   | 2.636   |
| 4     | 10.095    | 109164  | 6.687   |
| Total |           | 1632462 | 100.000 |

t = 72 h

Sample Name : t=72\_SOD\_815  
Sample ID :  
Data Filename : t=72\_SOD\_815.gcd  
Method Filename : Methode\_Achiral\_MUC\_Integration.gcm  
Batch Filename : batch.gcb  
Vial # : 7  
Injection Volume : 5 uL  
Date Acquired : 23.08.2019 19:10:13  
Date Processed : 02.09.2019 09:57:11

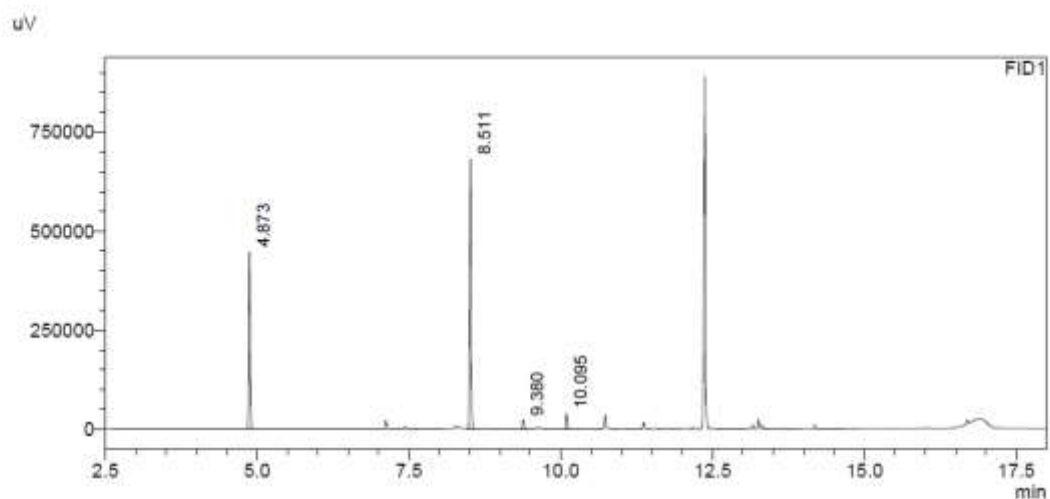

| Peak# | Ret. Time | Area    | Area%   |
|-------|-----------|---------|---------|
| 1     | 4.873     | 709971  | 37.825  |
| 2     | 8.511     | 1063295 | 56.650  |
| 3     | 9.380     | 44396   | 2.365   |
| 4     | 10.095    | 59309   | 3.160   |
| Total |           | 1876971 | 100.000 |

Sample Name : t=72\_SOD\_816  
Sample ID :  
Data Filename : t=72\_SOD\_816.gcd  
Method Filename : Methode\_Achiral\_MUC\_Integration.gcm  
Batch Filename : batch.gcb  
Vial # : 8  
Injection Volume : 5 uL  
Date Acquired : 23.08.2019 19:35:36  
Date Processed : 23.08.2019 19:56:21

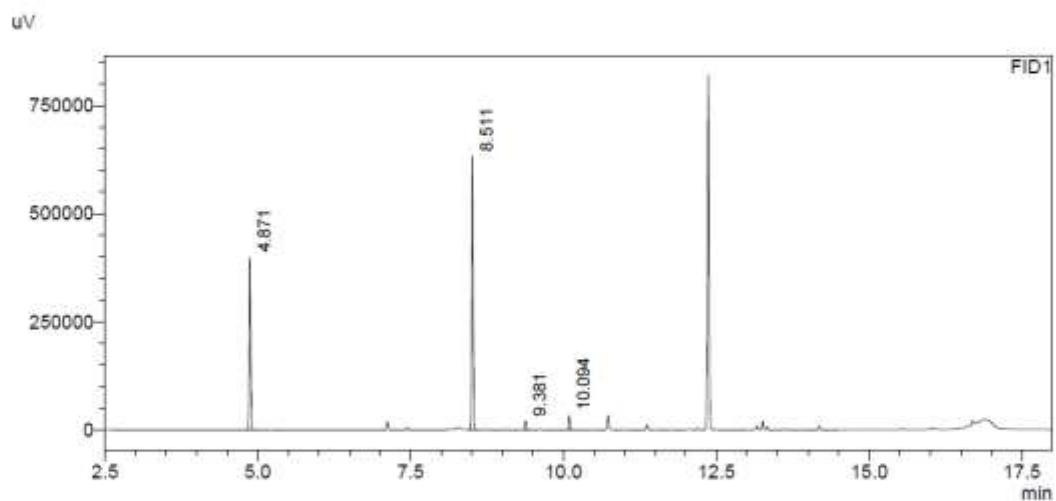

FID1

| Peak# | Ret. Time | Area    | Area%   |
|-------|-----------|---------|---------|
| 1     | 4.871     | 633044  | 37.273  |
| 2     | 8.511     | 977134  | 57.533  |
| 3     | 9.381     | 38324   | 2.256   |
| 4     | 10.094    | 49894   | 2.938   |
| Total |           | 1698396 | 100.000 |

Sample Name : t=72\_SOD\_817  
Sample ID :  
Data Filename : t=72\_SOD\_817.gcd  
Method Filename : Methode\_Achiral\_MUC\_Integration.gcm  
Batch Filename : batch.gcb  
Vial # : 9  
Injection Volume : 5 uL  
Date Acquired : 23.08.2019 20:01:03  
Date Processed : 23.08.2019 20:21:47

uV

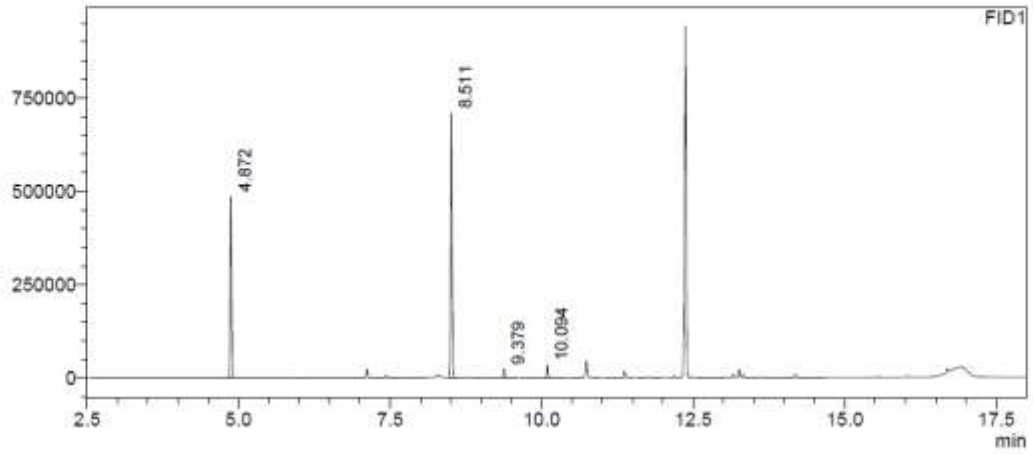

FID1

| Peak# | Ret. Time | Area    | Area%   |
|-------|-----------|---------|---------|
| 1     | 4.872     | 760285  | 37.977  |
| 2     | 8.511     | 1144366 | 57.163  |
| 3     | 9.379     | 46557   | 2.326   |
| 4     | 10.094    | 50734   | 2.534   |
| Total |           | 2001941 | 100.000 |

No I, *i*PrOH

t = 0 min

Sample Name : t=0\_SOD-1039  
Sample ID :  
Data Filename : t=0\_SOD-1039.gcd  
Method Filename : Methode\_Achiral\_MUC\_Integration.gcm  
Batch Filename : achiralGC.gcb  
Vial # : 55  
Injection Volume : 5 uL  
Date Acquired : 20.02.2020 15:58:47  
Date Processed : 20.02.2020 16:19:32

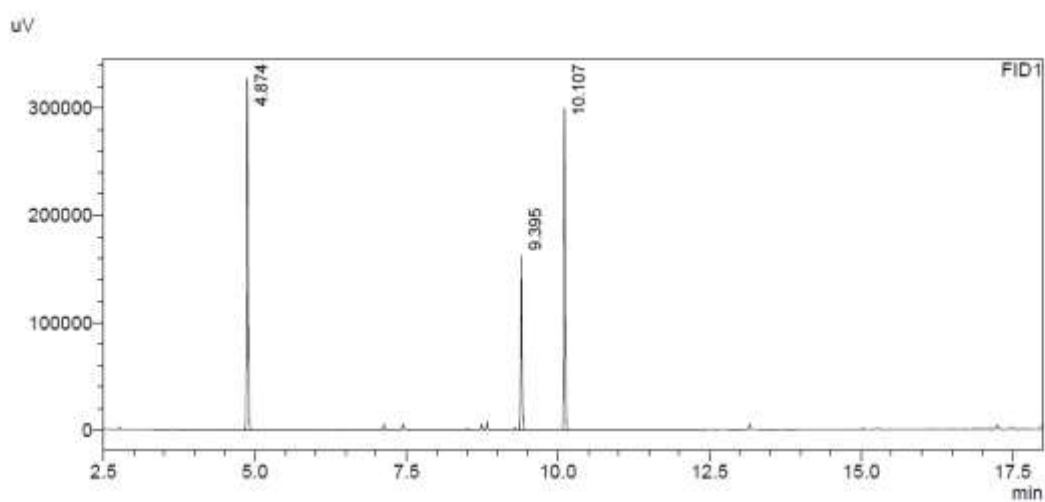

| Peak# | Ret. Time | Area    | Area%   |
|-------|-----------|---------|---------|
| 1     | 4.874     | 522401  | 43.754  |
| 2     | 9.395     | 236080  | 19.773  |
| 3     | 10.107    | 435471  | 36.473  |
| Total |           | 1193952 | 100.000 |

Sample Name : t=0\_SOD-1040  
Sample ID :  
Data Filename : t=0\_SOD-1040.gcd  
Method Filename : Methode\_Achiral\_MUC\_Integration.gcm  
Batch Filename : achiralGC.gcb  
Vial # : 56  
Injection Volume : 5 uL  
Date Acquired : 20.02.2020 16:24:11  
Date Processed : 20.02.2020 16:44:55

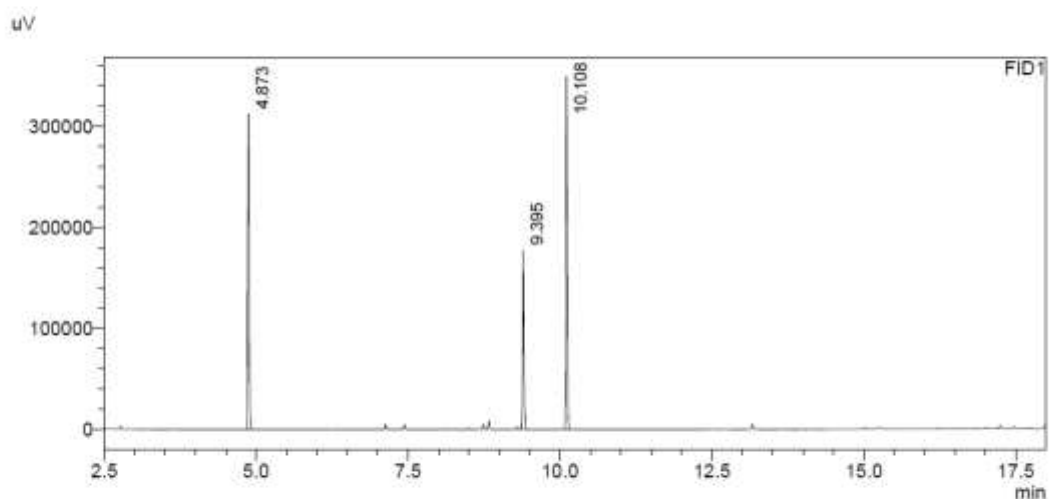

| Peak# | Ret. Time | Area    | Area%   |
|-------|-----------|---------|---------|
| 1     | 4.873     | 487287  | 38.947  |
| 2     | 9.395     | 251216  | 20.079  |
| 3     | 10.108    | 512638  | 40.974  |
| Total |           | 1251141 | 100.000 |

Sample Name : t=0\_SOD-1041  
Sample ID :  
Data Filename : t=0\_SOD-1041.gcd  
Method Filename : Methode\_Achiral\_MUC\_Integration.gcm  
Batch Filename : achiralGC.gcb  
Vial # : 57  
Injection Volume : 5 uL  
Date Acquired : 20.02.2020 16:49:36  
Date Processed : 20.02.2020 17:10:21

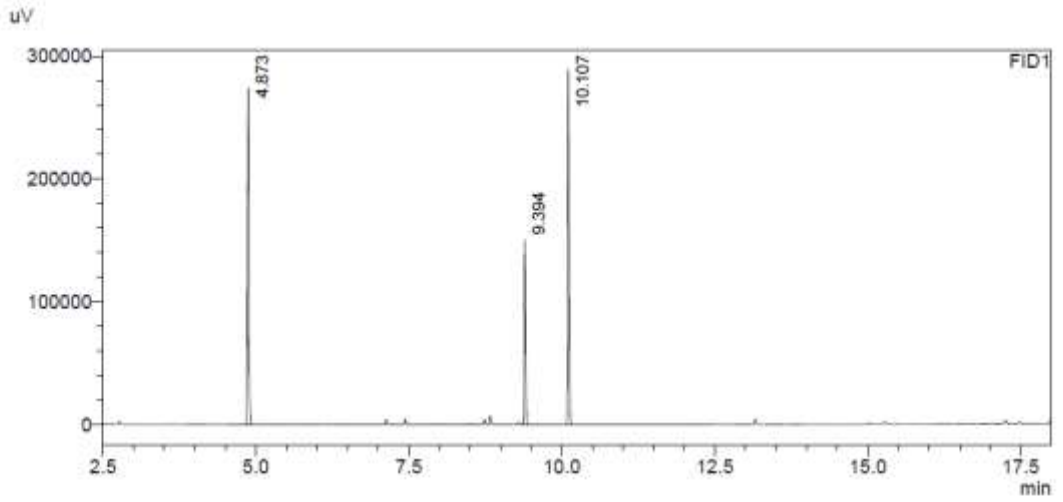

FID1

| Peak# | Ret. Time | Area    | Area%   |
|-------|-----------|---------|---------|
| 1     | 4.873     | 430676  | 40.417  |
| 2     | 9.394     | 214944  | 20.172  |
| 3     | 10.107    | 419954  | 39.411  |
| Total |           | 1065575 | 100.000 |



t = 24 h

Sample Name : t=24\_SOD-1039  
Sample ID :  
Data Filename : t=24\_SOD-1039.gcd  
Method Filename : Methode\_Achiral\_MUC\_Integration.gcm  
Batch Filename : achiralGC.gcb  
Vial # : 22  
Injection Volume : 5 uL  
Date Acquired : 21.02.2020 07:11:49  
Date Processed : 21.02.2020 07:32:32

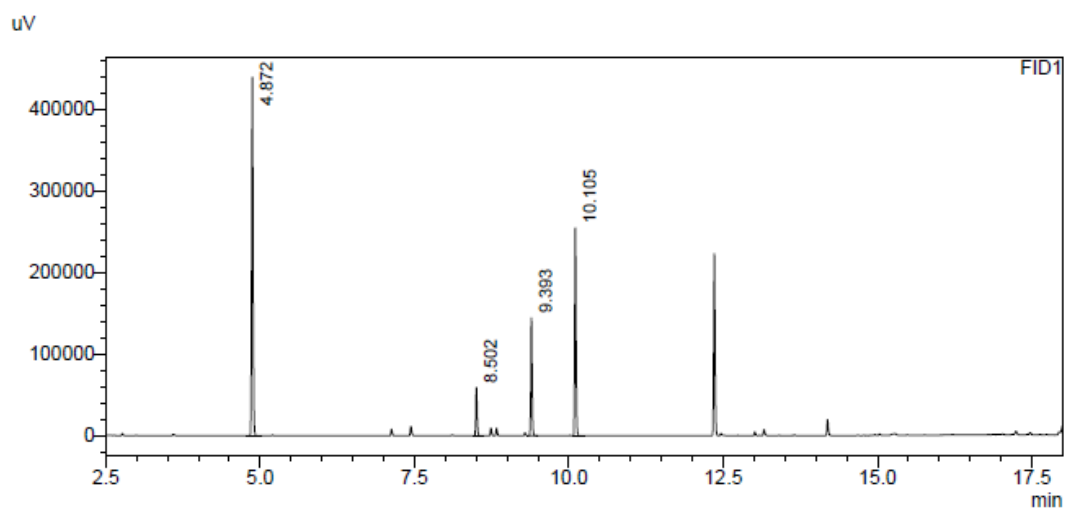

| Peak# | Ret. Time | Area    | Area%   |
|-------|-----------|---------|---------|
| 1     | 4.872     | 683413  | 50.729  |
| 2     | 8.502     | 86329   | 6.408   |
| 3     | 9.393     | 209227  | 15.531  |
| 4     | 10.105    | 368227  | 27.333  |
| Total |           | 1347195 | 100.000 |

Sample Name : t=24\_SOD-1040  
Sample ID :  
Data Filename : t=24\_SOD-1040.gcd  
Method Filename : Methode\_Achiral\_MUC\_Integration.gcm  
Batch Filename : achiralGC.gcb  
Vial # : 23  
Injection Volume : 5 uL  
Date Acquired : 21.02.2020 07:37:14  
Date Processed : 21.02.2020 07:57:58

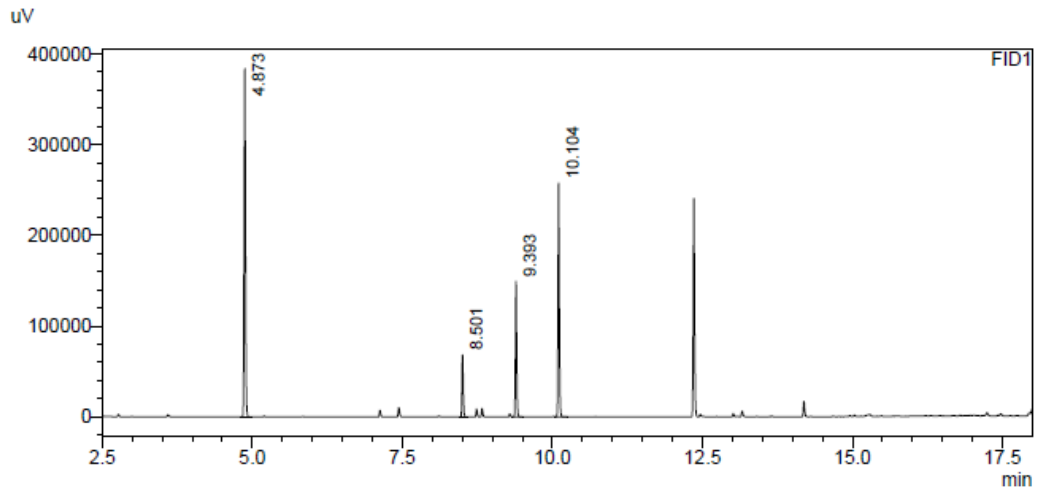

FID1

| Peak# | Ret. Time | Area    | Area%   |
|-------|-----------|---------|---------|
| 1     | 4.873     | 604580  | 46.709  |
| 2     | 8.501     | 100768  | 7.785   |
| 3     | 9.393     | 213586  | 16.501  |
| 4     | 10.104    | 375421  | 29.005  |
| Total |           | 1294355 | 100.000 |

Sample Name : t=24\_SOD-1041  
 Sample ID :  
 Data Filename : t=24\_SOD-1041.gcd  
 Method Filename : Methode\_Achiral\_MUC\_Integration.gcm  
 Batch Filename : achiralGC.gcb  
 Vial # : 24  
 Injection Volume : 5 uL  
 Date Acquired : 21.02.2020 08:02:36  
 Date Processed : 21.02.2020 08:23:20

uV

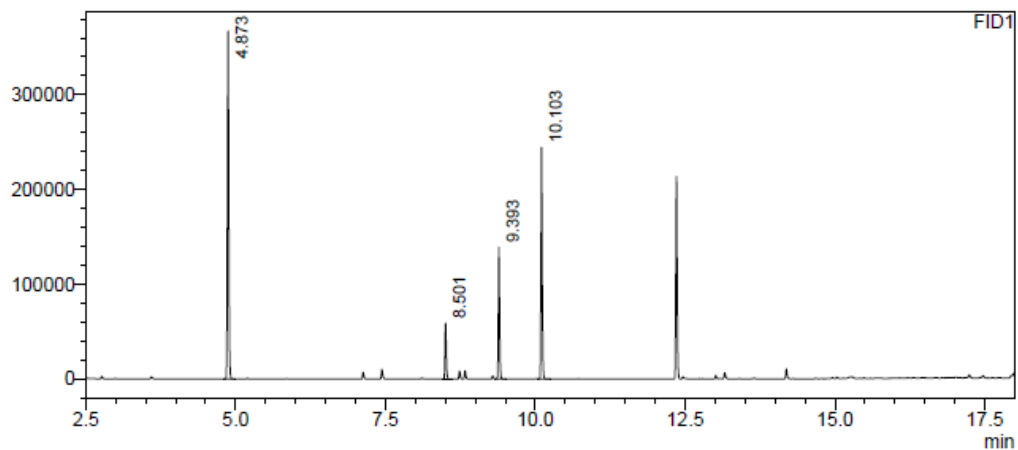

FID1

| Peak# | Ret. Time | Area    | Area%   |
|-------|-----------|---------|---------|
| 1     | 4.873     | 580534  | 47.640  |
| 2     | 8.501     | 86447   | 7.094   |
| 3     | 9.393     | 200131  | 16.423  |
| 4     | 10.103    | 351464  | 28.842  |
| Total |           | 1218576 | 100.000 |

t = 48 h

Sample Name : t=48\_SOD-1039  
Sample ID :  
Data Filename : t=48\_SOD-1039.gcd  
Method Filename : Methode\_Achiral\_MUC\_Integration.gcm  
Batch Filename : achiralGC.gcb  
Vial # : 22  
Injection Volume : 5 uL  
Date Acquired : 22.02.2020 04:19:16  
Date Processed : 22.02.2020 04:40:00

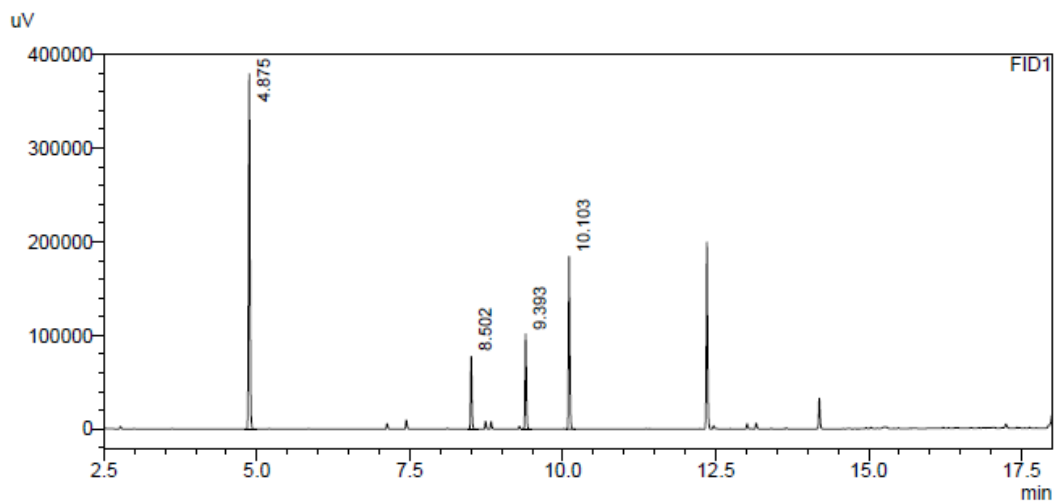

FID1

| Peak# | Ret. Time | Area    | Area%   |
|-------|-----------|---------|---------|
| 1     | 4.875     | 595954  | 53.072  |
| 2     | 8.502     | 109934  | 9.790   |
| 3     | 9.393     | 148233  | 13.201  |
| 4     | 10.103    | 268789  | 23.937  |
| Total |           | 1122910 | 100.000 |

Sample Name : t=48\_SOD-1040  
 Sample ID :  
 Data Filename : t=48\_SOD-1040.gcd  
 Method Filename : Methode\_Achiral\_MUC\_Integration.gcm  
 Batch Filename : achiralGC.gcb  
 Vial # : 23  
 Injection Volume : 5 uL  
 Date Acquired : 22.02.2020 04:44:37  
 Date Processed : 22.02.2020 05:05:20

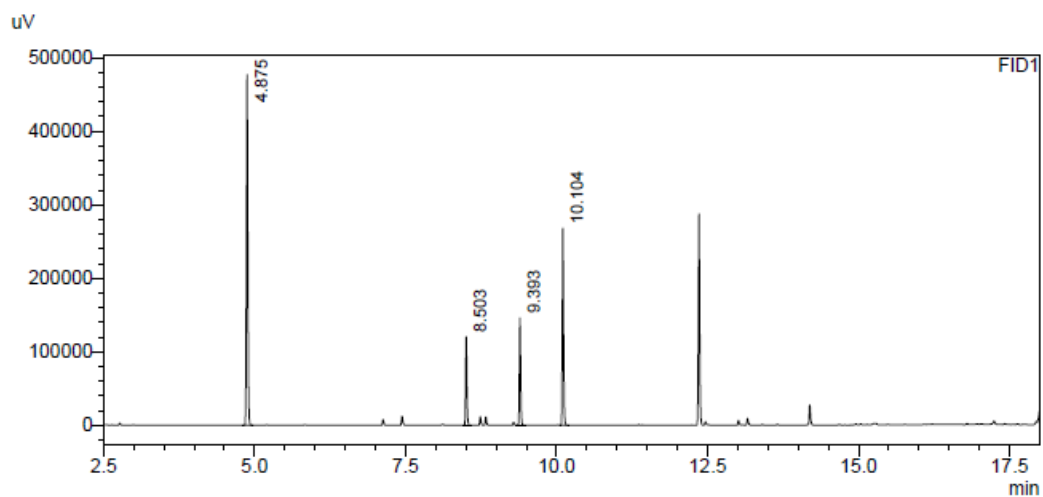

FID1

| Peak# | Ret. Time | Area    | Area%   |
|-------|-----------|---------|---------|
| 1     | 4.875     | 760632  | 49.586  |
| 2     | 8.503     | 176230  | 11.488  |
| 3     | 9.393     | 212321  | 13.841  |
| 4     | 10.104    | 384792  | 25.085  |
| Total |           | 1533975 | 100.000 |

Sample Name : t=48\_SOD-1041  
 Sample ID :  
 Data Filename : t=48\_SOD-1041.gcd  
 Method Filename : Methode\_Achiral\_MUC\_Integration.gcm  
 Batch Filename : achiralGC.gcb  
 Vial # : 24  
 Injection Volume : 5 uL  
 Date Acquired : 22.02.2020 05:09:56  
 Date Processed : 22.02.2020 05:30:41

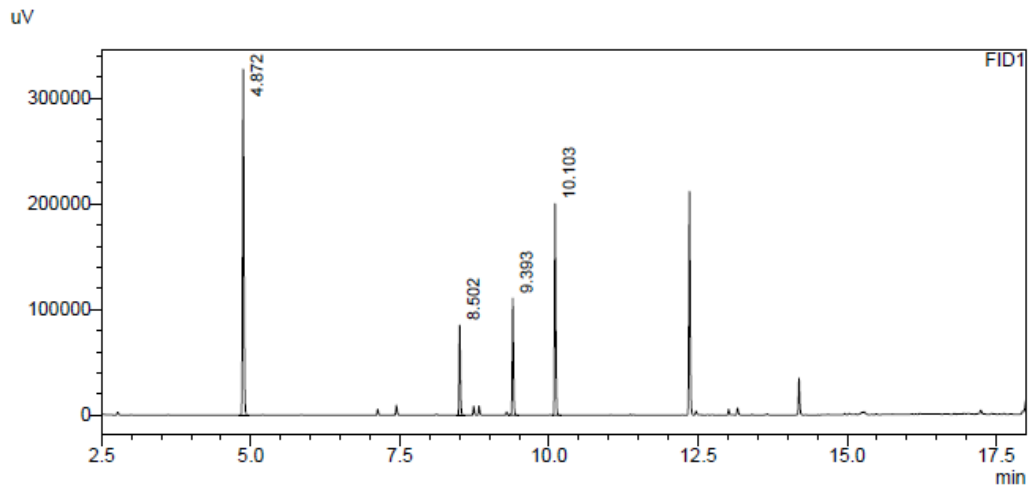

FID1

| Peak# | Ret. Time | Area    | Area%   |
|-------|-----------|---------|---------|
| 1     | 4.872     | 511618  | 47.378  |
| 2     | 8.502     | 122722  | 11.365  |
| 3     | 9.393     | 158291  | 14.658  |
| 4     | 10.103    | 287241  | 26.600  |
| Total |           | 1079872 | 100.000 |

t = 72 h

Sample Name : t=72\_SOD-1039  
Sample ID :  
Data Filename : t=72\_SOD-1039.gcd  
Method Filename : Methode\_Achiral\_MUC\_Integration.gcm  
Batch Filename : achiralGC.gcb  
Vial # : 22  
Injection Volume : 5 uL  
Date Acquired : 27.02.2020 02:54:38  
Date Processed : 27.02.2020 03:15:21

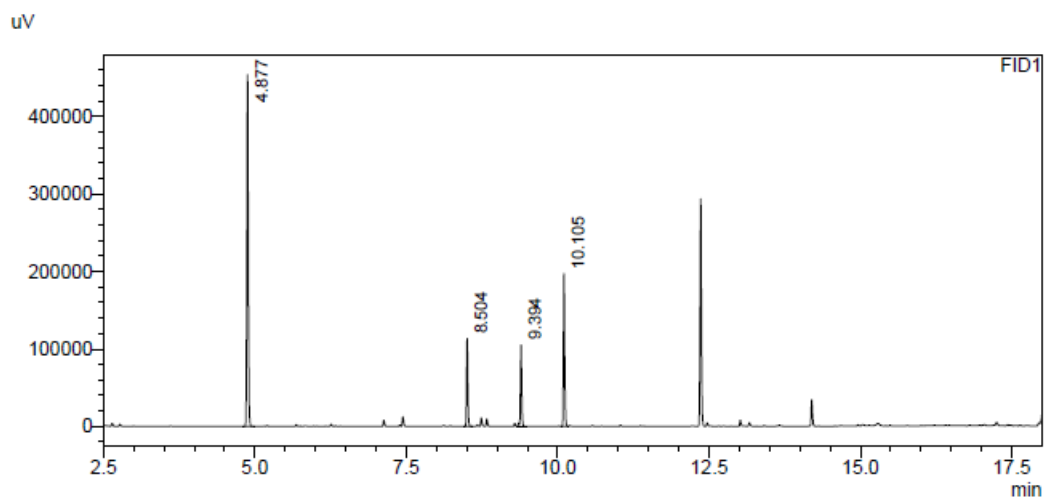

| Peak# | Ret. Time | Area    | Area%   |
|-------|-----------|---------|---------|
| 1     | 4.877     | 722405  | 54.413  |
| 2     | 8.504     | 163893  | 12.345  |
| 3     | 9.394     | 157954  | 11.897  |
| 4     | 10.105    | 283379  | 21.345  |
| Total |           | 1327631 | 100.000 |

Sample Name : t=72\_SOD-1040  
 Sample ID :  
 Data Filename : t=72\_SOD-1040.gcd  
 Method Filename : Methode\_Achiral\_MUC\_Integration.gcm  
 Batch Filename : achiralGC.gcb  
 Vial # : 23  
 Injection Volume : 5 uL  
 Date Acquired : 27.02.2020 03:19:58  
 Date Processed : 27.02.2020 03:40:41

uV

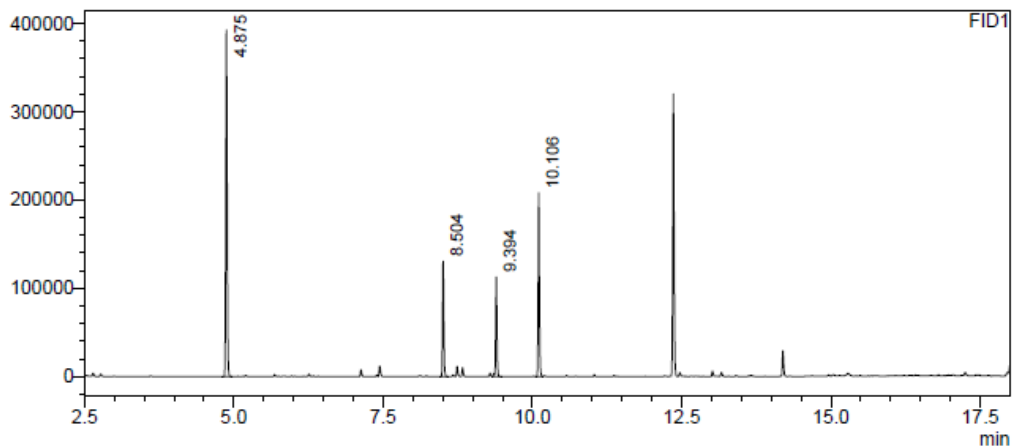

FID1

| Peak# | Ret. Time | Area    | Area%   |
|-------|-----------|---------|---------|
| 1     | 4.875     | 620604  | 48.700  |
| 2     | 8.504     | 187840  | 14.740  |
| 3     | 9.394     | 167042  | 13.108  |
| 4     | 10.106    | 298845  | 23.451  |
| Total |           | 1274331 | 100.000 |



Sample Name : t=72\_SOD-1041  
 Sample ID :  
 Data Filename : t=72\_SOD-1041.gcd  
 Method Filename : Methode\_Achiral\_MUC\_Integration.gcm  
 Batch Filename : achiralGC.gcb  
 Vial # : 24  
 Injection Volume : 5 uL  
 Date Acquired : 27.02.2020 03:45:18  
 Date Processed : 27.02.2020 04:06:03

uV

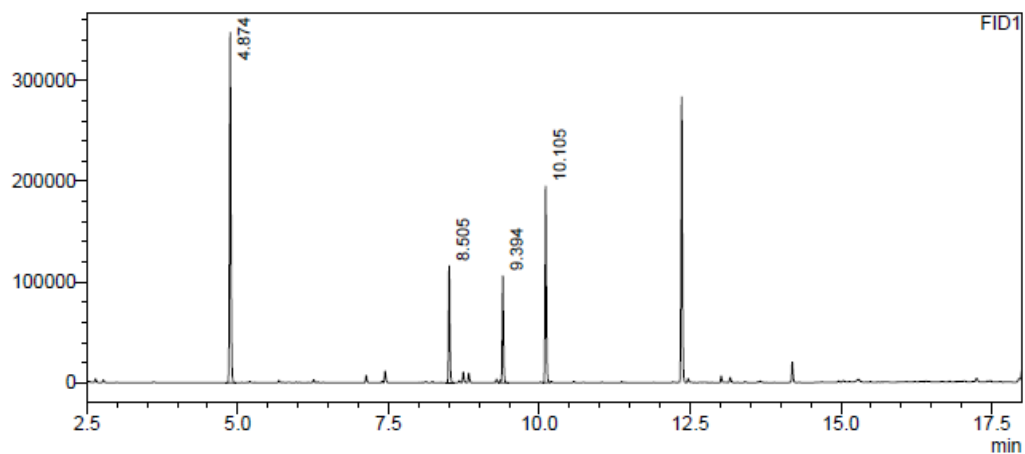

FID1

| Peak# | Ret. Time | Area    | Area%   |
|-------|-----------|---------|---------|
| 1     | 4.874     | 543050  | 47.694  |
| 2     | 8.505     | 166452  | 14.619  |
| 3     | 9.394     | 153325  | 13.466  |
| 4     | 10.105    | 275783  | 24.221  |
| Total |           | 1138609 | 100.000 |

No I, no *i*PrOH

**t = 0 min**

Sample Name : t=0\_SOD-1036  
Sample ID :  
Data Filename : t=0\_SOD-1036.gcd  
Method Filename : Methode\_Achiral\_MUC\_Integration.gcm  
Batch Filename : achiralGC.gcb  
Vial # : 52  
Injection Volume : 5 uL  
Date Acquired : 20.02.2020 14:42:42  
Date Processed : 20.02.2020 15:03:26

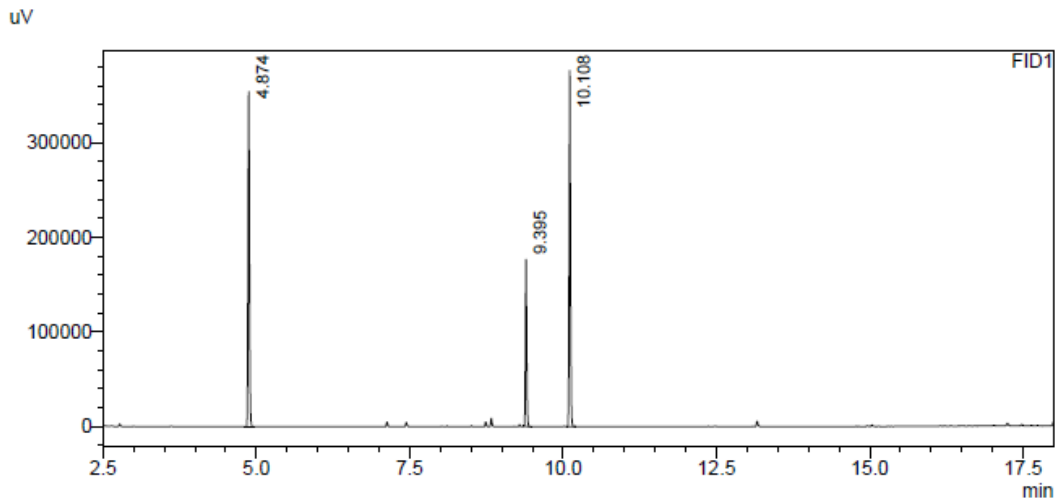

FID1

| Peak# | Ret. Time | Area    | Area%   |
|-------|-----------|---------|---------|
| 1     | 4.874     | 557606  | 41.070  |
| 2     | 9.395     | 251285  | 18.508  |
| 3     | 10.108    | 548800  | 40.422  |
| Total |           | 1357691 | 100.000 |

Sample Name : t=0\_SOD-1037  
Sample ID :  
Data Filename : t=0\_SOD-1037.gcd  
Method Filename : Methode\_Achiral\_MUC\_Integration.gcm  
Batch Filename : achiralGC.gcb  
Vial # : 53  
Injection Volume : 5 uL  
Date Acquired : 20.02.2020 15:08:04  
Date Processed : 20.02.2020 15:28:47

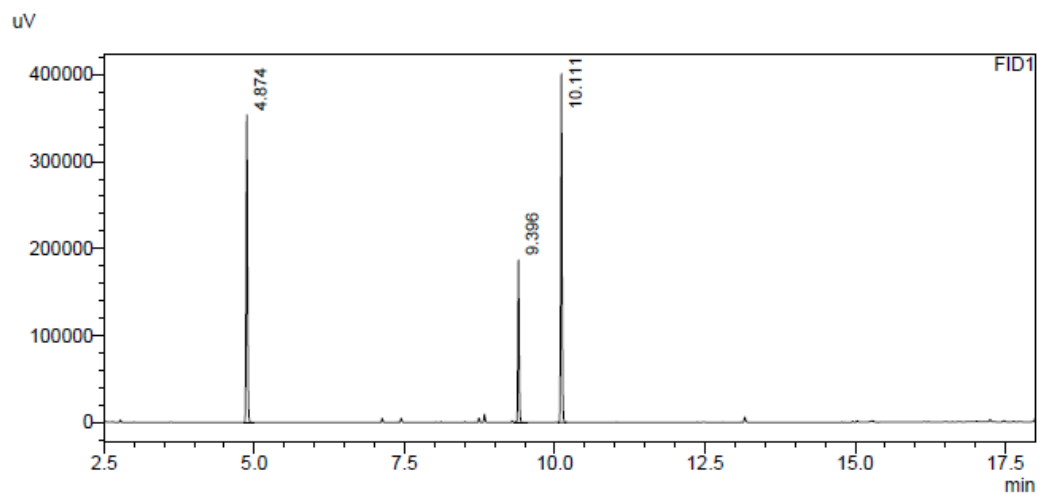

FID1

| Peak# | Ret. Time | Area    | Area%   |
|-------|-----------|---------|---------|
| 1     | 4.874     | 563521  | 39.490  |
| 2     | 9.396     | 269236  | 18.867  |
| 3     | 10.111    | 594244  | 41.643  |
| Total |           | 1427001 | 100.000 |

Sample Name : t=0\_SOD-1038  
Sample ID :  
Data Filename : t=0\_SOD-1038.gcd  
Method Filename : Methode\_Achiral\_MUC\_Integration.gcm  
Batch Filename : achiralGC.gcb  
Vial # : 54  
Injection Volume : 5 uL  
Date Acquired : 20.02.2020 15:33:26  
Date Processed : 20.02.2020 15:54:09

uV

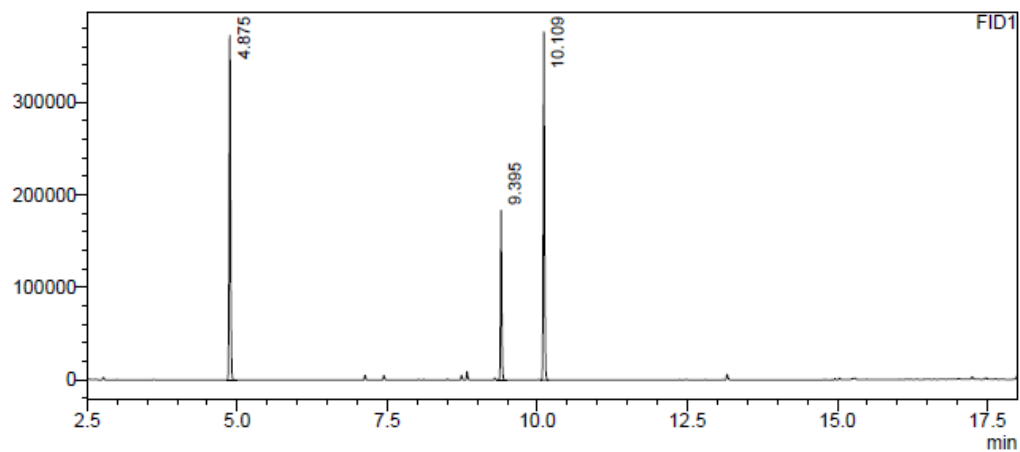

| Peak# | Ret. Time | Area    | Area%   |
|-------|-----------|---------|---------|
| 1     | 4.875     | 583203  | 41.509  |
| 2     | 9.395     | 263275  | 18.739  |
| 3     | 10.109    | 558510  | 39.752  |
| Total |           | 1404988 | 100.000 |

t = 24 h

Sample Name : t=24\_SOD-1036  
Sample ID :  
Data Filename : t=24\_SOD-1036.gcd  
Method Filename : Methode\_Achiral\_MUC\_Integration.gcm  
Batch Filename : achiralGC.gcb  
Vial # : 19  
Injection Volume : 5 uL  
Date Acquired : 21.02.2020 05:55:49  
Date Processed : 21.02.2020 06:16:33

uV

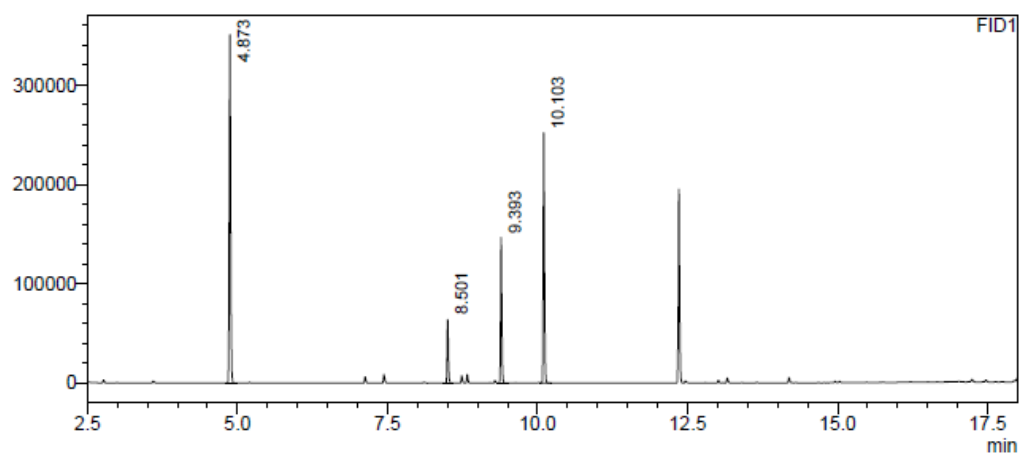

| Peak# | Ret. Time | Area    | Area%   |
|-------|-----------|---------|---------|
| 1     | 4.873     | 558477  | 45.698  |
| 2     | 8.501     | 92586   | 7.576   |
| 3     | 9.393     | 207248  | 16.958  |
| 4     | 10.103    | 363781  | 29.767  |
| Total |           | 1222093 | 100.000 |

Sample Name : t=24\_SOD-1037  
Sample ID :  
Data Filename : t=24\_SOD-1037.gcd  
Method Filename : Methode\_Achiral\_MUC\_Integration.gcm  
Batch Filename : achiralGC.gcb  
Vial # : 20  
Injection Volume : 5 uL  
Date Acquired : 21.02.2020 06:21:10  
Date Processed : 21.02.2020 06:41:54

uV

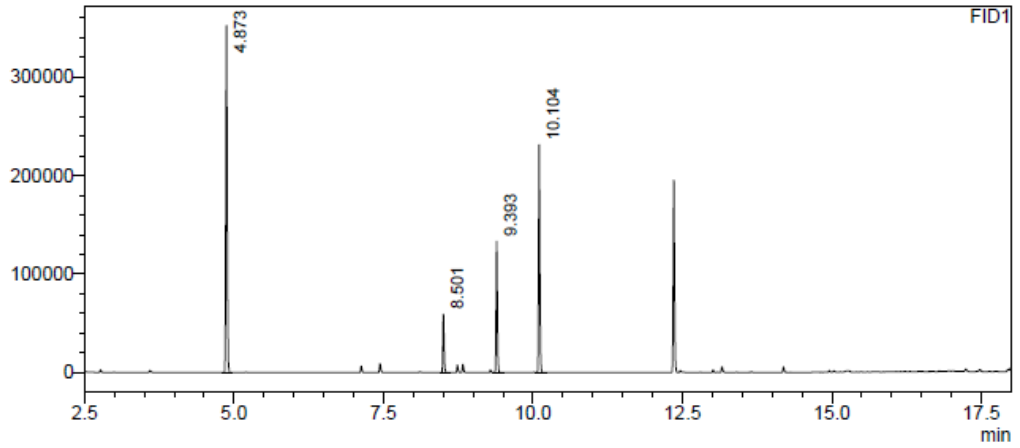

FID1

| Peak# | Ret. Time | Area    | Area%   |
|-------|-----------|---------|---------|
| 1     | 4.873     | 548487  | 47.138  |
| 2     | 8.501     | 87017   | 7.478   |
| 3     | 9.393     | 191050  | 16.419  |
| 4     | 10.104    | 337019  | 28.964  |
| Total |           | 1163572 | 100.000 |

Sample Name : t=24\_SOD-1038  
 Sample ID :  
 Data Filename : t=24\_SOD-1038.gcd  
 Method Filename : Methode\_Achiral\_MUC\_Integration.gcm  
 Batch Filename : achiralGC.gcb  
 Vial # : 21  
 Injection Volume : 5 uL  
 Date Acquired : 21.02.2020 06:46:30  
 Date Processed : 21.02.2020 07:07:15

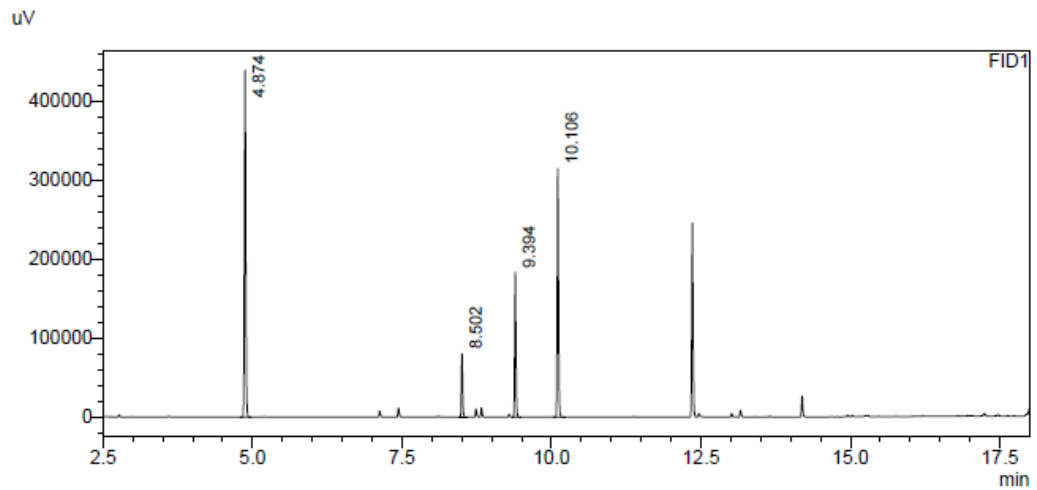

FID1

| Peak# | Ret. Time | Area    | Area%   |
|-------|-----------|---------|---------|
| 1     | 4.874     | 694335  | 45.251  |
| 2     | 8.502     | 113782  | 7.415   |
| 3     | 9.394     | 262123  | 17.083  |
| 4     | 10.106    | 464172  | 30.251  |
| Total |           | 1534411 | 100.000 |

t = 48 h

Sample Name : t=48\_SOD-1036  
Sample ID :  
Data Filename : t=48\_SOD-1036.gcd  
Method Filename : Methode\_Achiral\_MUC\_Integration.gcm  
Batch Filename : achiralGC.gcb  
Vial # : 19  
Injection Volume : 5 uL  
Date Acquired : 22.02.2020 03:03:16  
Date Processed : 22.02.2020 03:23:59

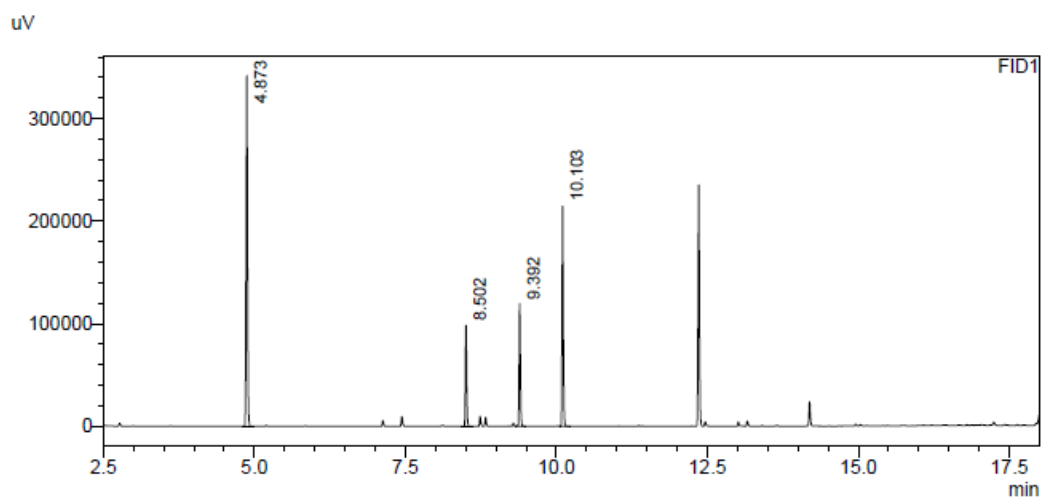

| Peak# | Ret. Time | Area    | Area%   |
|-------|-----------|---------|---------|
| 1     | 4.873     | 537999  | 46.461  |
| 2     | 8.502     | 141526  | 12.222  |
| 3     | 9.392     | 172169  | 14.868  |
| 4     | 10.103    | 306270  | 26.449  |
| Total |           | 1157964 | 100.000 |



Sample Name : t=48\_SOD-1037  
Sample ID :  
Data Filename : t=48\_SOD-1037.gcd  
Method Filename : Methode\_Achiral\_MUC\_Integration.gcm  
Batch Filename : achiralGC.gcb  
Vial # : 20  
Injection Volume : 5 uL  
Date Acquired : 22.02.2020 03:28:38  
Date Processed : 22.02.2020 03:49:20

uV

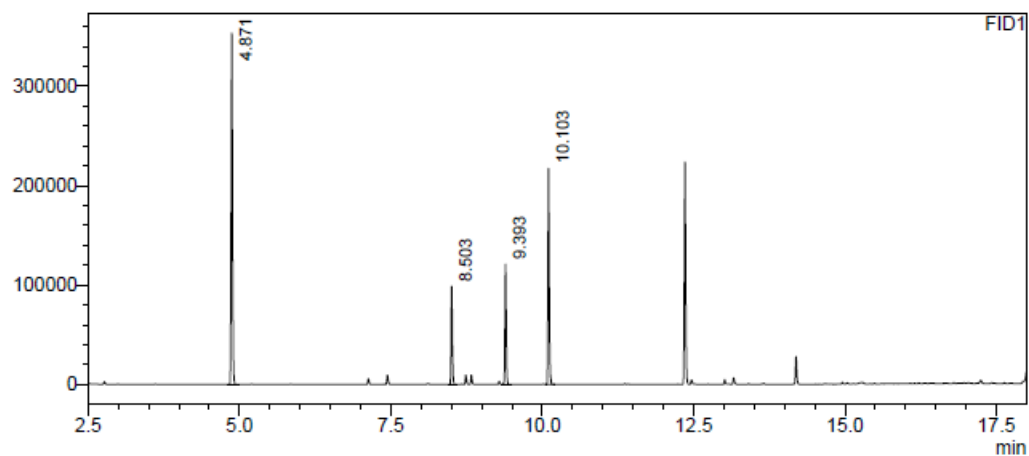

FID1

| Peak# | Ret. Time | Area    | Area%   |
|-------|-----------|---------|---------|
| 1     | 4.871     | 548794  | 46.509  |
| 2     | 8.503     | 141564  | 11.997  |
| 3     | 9.393     | 175063  | 14.836  |
| 4     | 10.103    | 314557  | 26.658  |
| Total |           | 1179978 | 100.000 |

Sample Name : t=48\_SOD-1038  
Sample ID :  
Data Filename : t=48\_SOD-1038.gcd  
Method Filename : Methode\_Achiral\_MUC\_Integration.gcm  
Batch Filename : achiralGC.gcb  
Vial # : 21  
Injection Volume : 5 uL  
Date Acquired : 22.02.2020 03:53:56  
Date Processed : 22.02.2020 04:14:42

uV

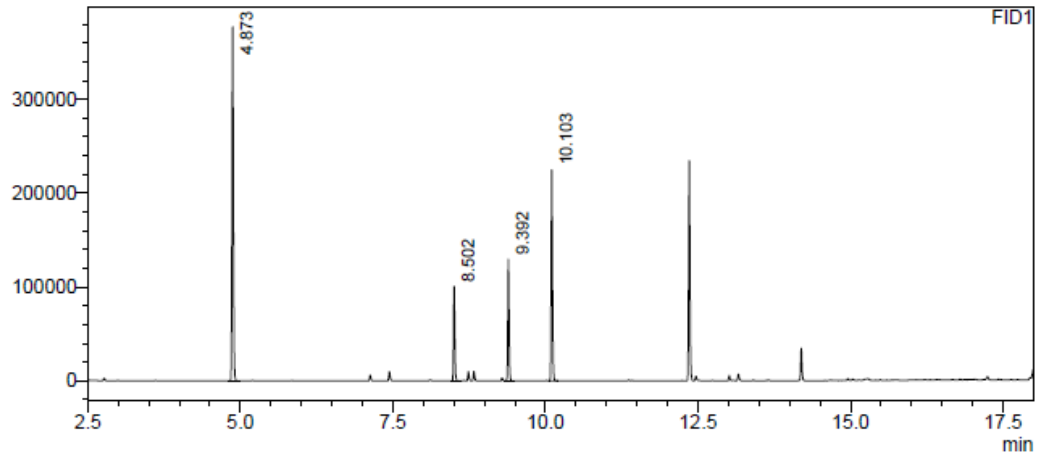

FID1

| Peak# | Ret. Time | Area    | Area%   |
|-------|-----------|---------|---------|
| 1     | 4.873     | 585735  | 46.868  |
| 2     | 8.502     | 145218  | 11.620  |
| 3     | 9.392     | 184902  | 14.795  |
| 4     | 10.103    | 333897  | 26.717  |
| Total |           | 1249751 | 100.000 |

t = 72 h

Sample Name : t=72\_SOD-1036  
Sample ID :  
Data Filename : t=72\_SOD-1036.gcd  
Method Filename : Methode\_Achiral\_MUC\_Integration.gcm  
Batch Filename : achiralGC.gcb  
Vial # : 19  
Injection Volume : 5 uL  
Date Acquired : 27.02.2020 01:38:43  
Date Processed : 27.02.2020 01:59:27

uV

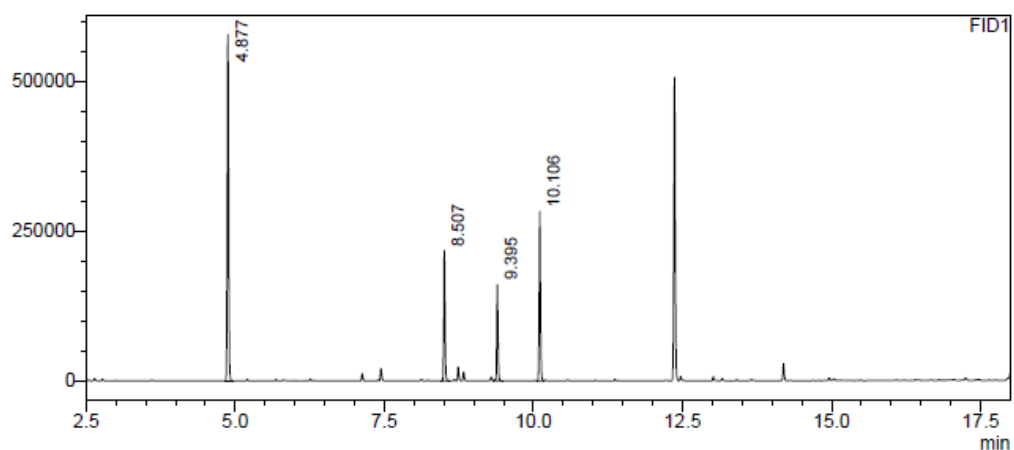

| Peak# | Ret. Time | Area    | Area%   |
|-------|-----------|---------|---------|
| 1     | 4.877     | 905860  | 48.650  |
| 2     | 8.507     | 312628  | 16.790  |
| 3     | 9.395     | 232975  | 12.512  |
| 4     | 10.106    | 410534  | 22.048  |
| Total |           | 1861997 | 100.000 |

Sample Name : t=72\_SOD-1037  
 Sample ID :  
 Data Filename : t=72\_SOD-1037.gcd  
 Method Filename : Methode\_Achiral\_MUC\_Integration.gcm  
 Batch Filename : achiralGC.gcb  
 Vial # : 20  
 Injection Volume : 5 uL  
 Date Acquired : 27.02.2020 02:04:00  
 Date Processed : 27.02.2020 02:24:45

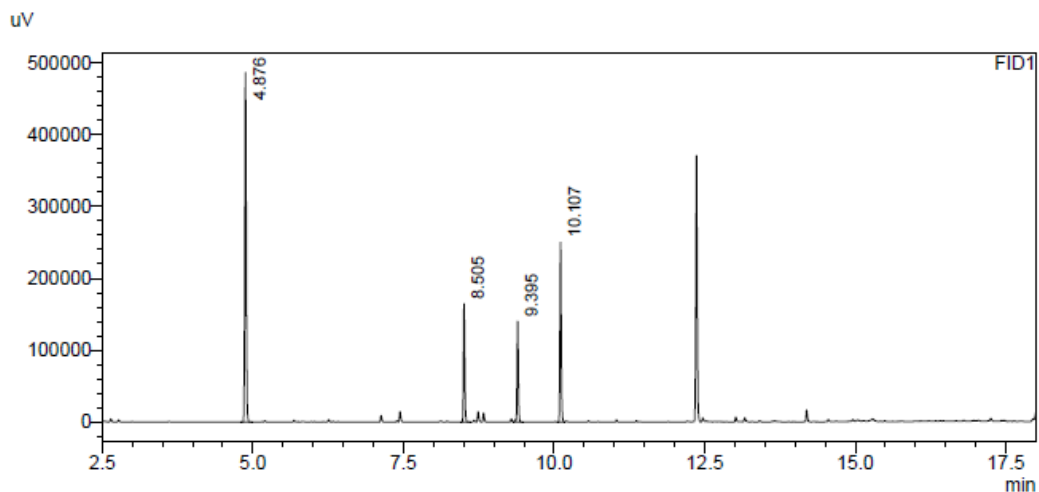

FID1

| Peak# | Ret. Time | Area    | Area%   |
|-------|-----------|---------|---------|
| 1     | 4.876     | 774203  | 48.890  |
| 2     | 8.505     | 239630  | 15.132  |
| 3     | 9.395     | 203479  | 12.849  |
| 4     | 10.107    | 366250  | 23.128  |
| Total |           | 1583562 | 100.000 |

Sample Name : t=72\_SOD-1038  
 Sample ID :  
 Data Filename : t=72\_SOD-1038.gcd  
 Method Filename : Methode\_Achiral\_MUC\_Integration.gcm  
 Batch Filename : achiralGC.gcb  
 Vial # : 21  
 Injection Volume : 5 uL  
 Date Acquired : 27.02.2020 02:29:19  
 Date Processed : 27.02.2020 02:50:05

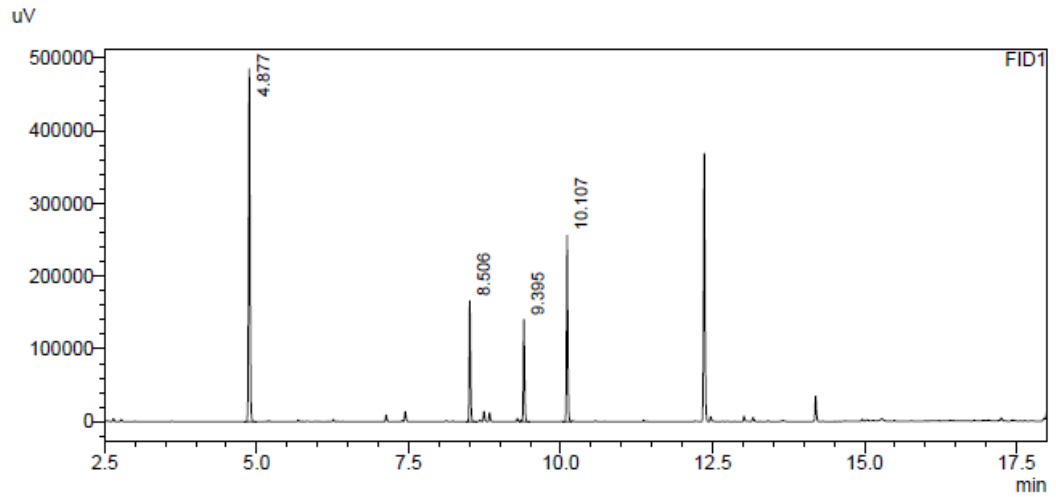

FID1

| Peak# | Ret. Time | Area    | Area%   |
|-------|-----------|---------|---------|
| 1     | 4.877     | 773638  | 48.854  |
| 2     | 8.506     | 237219  | 14.980  |
| 3     | 9.395     | 203331  | 12.840  |
| 4     | 10.107    | 369384  | 23.326  |
| Total |           | 1583572 | 100.000 |

## Entry 5

I, *i*PrOH

t = 0 min

Sample Name : t=0\_827-832  
Sample ID :  
Data Filename : t=0.gcd  
Method Filename : Methode\_Achiral\_MUC\_Integration.gcm  
Batch Filename : batch.gcd  
Vial # : 1  
Injection Volume : 5 uL  
Date Acquired : 20.08.2019 11:36:22  
Date Processed : 20.08.2019 11:57:06

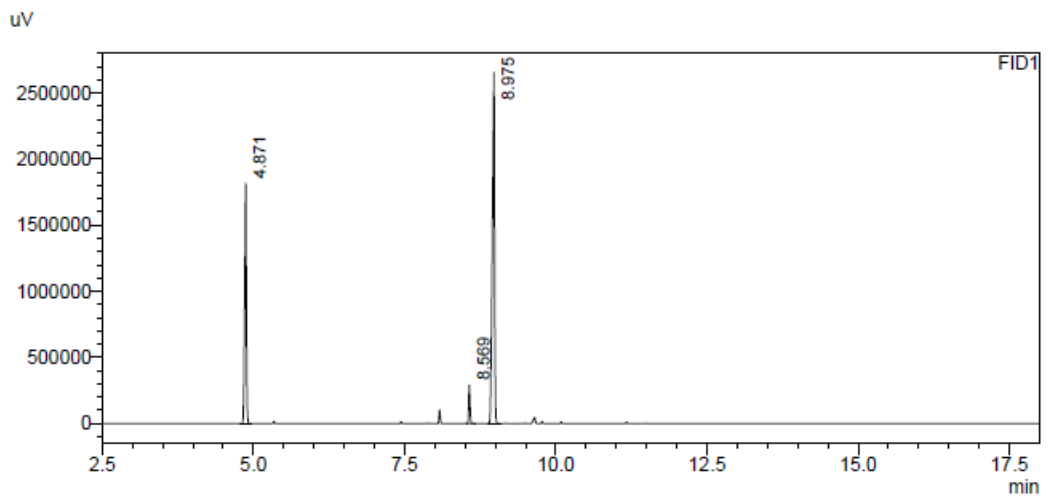

| Peak# | Ret. Time | Area     | Area%   |
|-------|-----------|----------|---------|
| 1     | 4.871     | 3483890  | 32.788  |
| 2     | 8.569     | 428601   | 4.034   |
| 3     | 8.975     | 6712874  | 63.178  |
| Total |           | 10625365 | 100.000 |

t = 24 h

Sample Name : t=24\_SOD\_830  
Sample ID :  
Data Filename : t=24\_SOD\_830.gcd  
Method Filename : Methode\_Achiral\_MUC\_Integration.gcm  
Batch Filename : batch.gc5  
Vial # : 4  
Injection Volume : 5 uL  
Date Acquired : 21.08.2019 13:57:17  
Date Processed : 21.08.2019 14:18:01

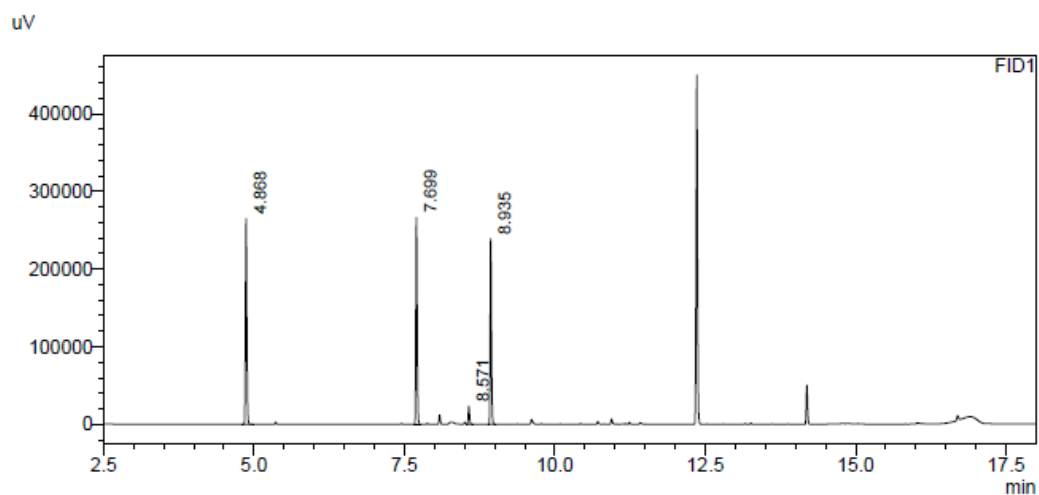

| Peak# | Ret. Time | Area    | Area%   |
|-------|-----------|---------|---------|
| 1     | 4.868     | 413837  | 34.981  |
| 2     | 7.699     | 390821  | 33.036  |
| 3     | 8.571     | 33116   | 2.799   |
| 4     | 8.935     | 345253  | 29.184  |
| Total |           | 1183027 | 100.000 |

Sample Name : t=24\_SOD\_831  
 Sample ID :  
 Data Filename : t=24\_SOD\_831.gcd  
 Method Filename : Methode\_Achiral\_MUC\_Integration.gcm  
 Batch Filename : batch.gcb  
 Vial # : 5  
 Injection Volume : 5 uL  
 Date Acquired : 21.08.2019 14:22:37  
 Date Processed : 21.08.2019 14:43:22

uV

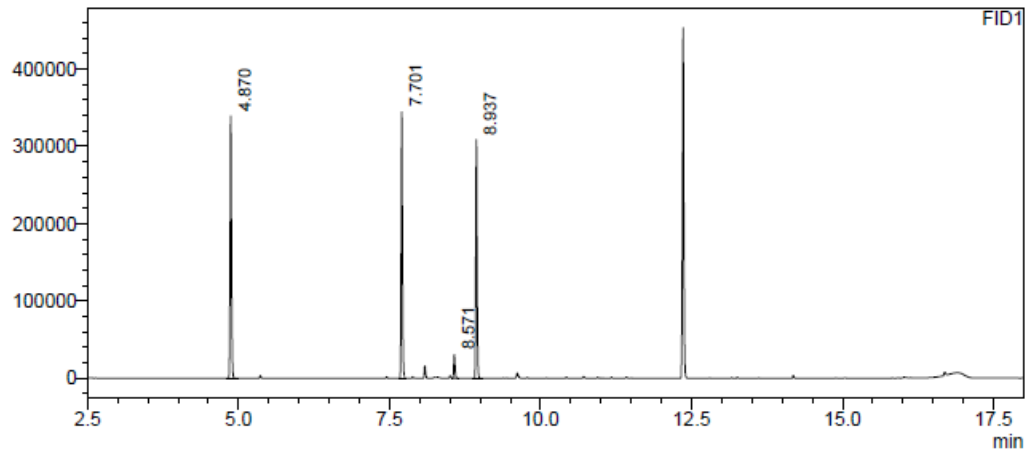

FID1

| Peak# | Ret. Time | Area    | Area%   |
|-------|-----------|---------|---------|
| 1     | 4.870     | 534062  | 34.785  |
| 2     | 7.701     | 504262  | 32.844  |
| 3     | 8.571     | 44423   | 2.893   |
| 4     | 8.937     | 452590  | 29.478  |
| Total |           | 1535337 | 100.000 |



Sample Name : t=24\_SOD\_832  
Sample ID :  
Data Filename : t=24\_SOD\_832.gcd  
Method Filename : Methode\_Achiral\_MUC\_Integration.gcm  
Batch Filename : batch.gcb  
Vial # : 6  
Injection Volume : 5 uL  
Date Acquired : 21.08.2019 14:47:57  
Date Processed : 21.08.2019 15:08:42

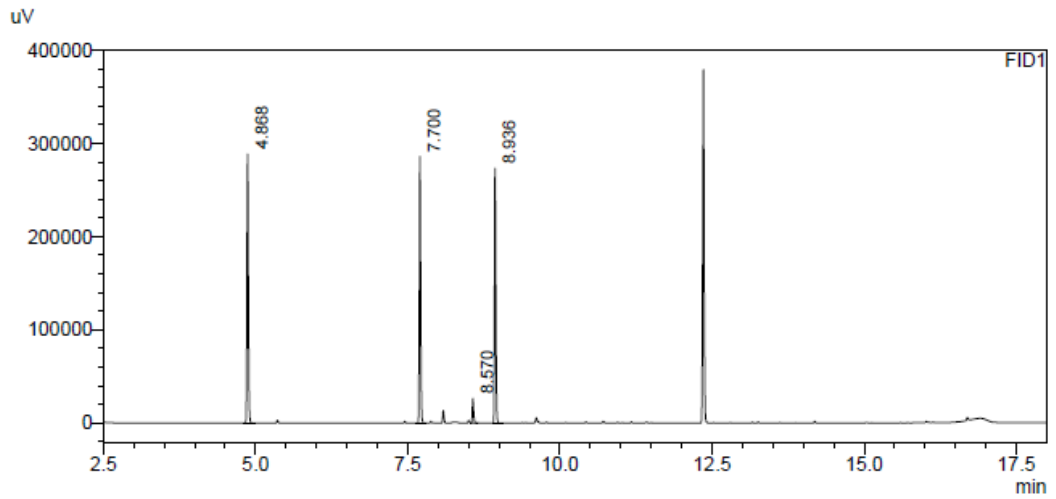

FID1

| Peak# | Ret. Time | Area    | Area%   |
|-------|-----------|---------|---------|
| 1     | 4.868     | 455929  | 34.999  |
| 2     | 7.700     | 414952  | 31.854  |
| 3     | 8.570     | 38069   | 2.922   |
| 4     | 8.936     | 393731  | 30.225  |
| Total |           | 1302682 | 100.000 |

t = 48 h

Sample Name : t=48\_SOD\_830  
Sample ID :  
Data Filename : t=48\_SOD\_830.gcd  
Method Filename : Methode\_Achiral\_MUC\_Integration.gcm  
Batch Filename : batch.gcb  
Vial # : 4  
Injection Volume : 5 uL  
Date Acquired : 22.08.2019 14:08:38  
Date Processed : 22.08.2019 14:29:21

uV

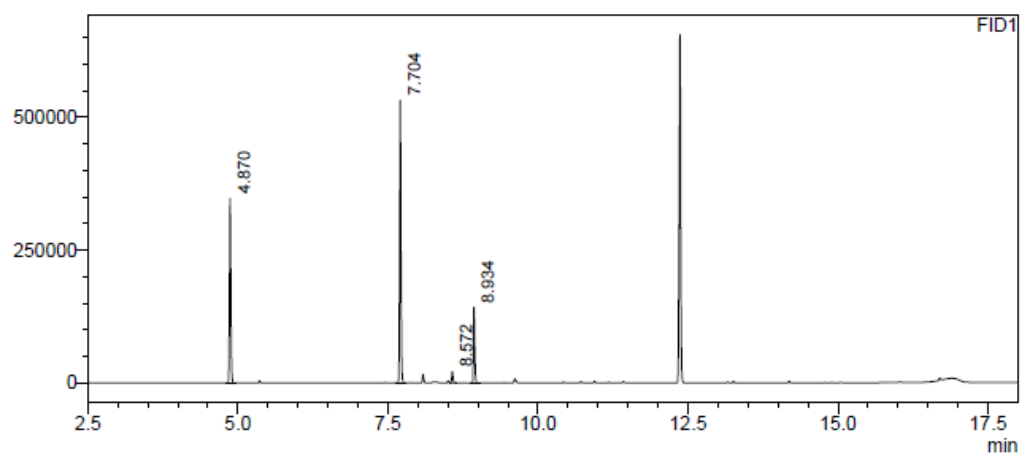

FID1

| Peak# | Ret. Time | Area    | Area%   |
|-------|-----------|---------|---------|
| 1     | 4.870     | 544191  | 34.586  |
| 2     | 7.704     | 789230  | 50.159  |
| 3     | 8.572     | 30870   | 1.962   |
| 4     | 8.934     | 209159  | 13.293  |
| Total |           | 1573450 | 100.000 |

Sample Name : t=48\_SOD\_831  
Sample ID :  
Data Filename : t=48\_SOD\_831.gcd  
Method Filename : Methode\_Achiral\_MUC\_Integration.gcm  
Batch Filename : batch.gcb  
Vial # : 5  
Injection Volume : 5 uL  
Date Acquired : 22.08.2019 14:34:00  
Date Processed : 22.08.2019 14:54:44

uV

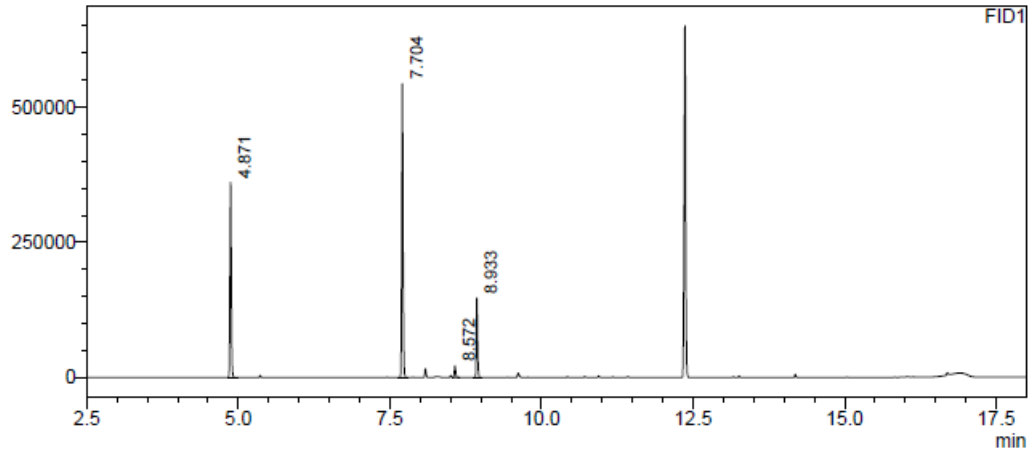

FID1

| Peak# | Ret. Time | Area    | Area%   |
|-------|-----------|---------|---------|
| 1     | 4.871     | 557548  | 34.791  |
| 2     | 7.704     | 800046  | 49.922  |
| 3     | 8.572     | 31119   | 1.942   |
| 4     | 8.933     | 213866  | 13.345  |
| Total |           | 1602578 | 100.000 |

Sample Name : t=48\_SOD\_832  
 Sample ID :  
 Data Filename : t=48\_SOD\_832.gcd  
 Method Filename : Methode\_Achiral\_MUC\_Integration.gcm  
 Batch Filename : batch.gcb  
 Vial # : 6  
 Injection Volume : 5 uL  
 Date Acquired : 22.08.2019 14:59:21  
 Date Processed : 22.08.2019 15:20:06

uV

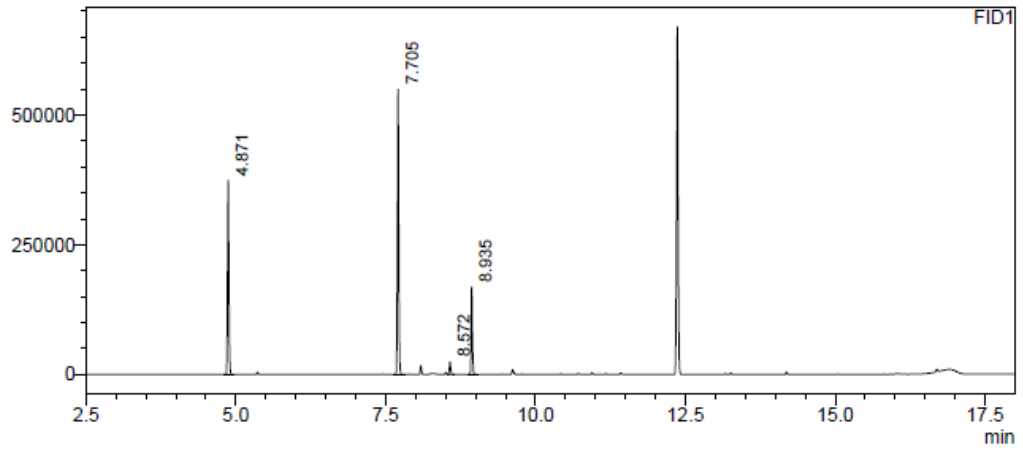

FID1

| Peak# | Ret. Time | Area    | Area%   |
|-------|-----------|---------|---------|
| 1     | 4.871     | 590361  | 34.878  |
| 2     | 7.705     | 823851  | 48.673  |
| 3     | 8.572     | 35039   | 2.070   |
| 4     | 8.935     | 243387  | 14.379  |
| Total |           | 1692638 | 100.000 |

t = 72 h

Sample Name : t=72\_SOD\_830  
Sample ID :  
Data Filename : t=72\_SOD\_830.gcd  
Method Filename : Methode\_Achiral\_MUC\_Integration.gcm  
Batch Filename : batch.gcb  
Vial # : 4  
Injection Volume : 5 uL  
Date Acquired : 23.08.2019 17:54:00  
Date Processed : 23.08.2019 18:14:42

uV

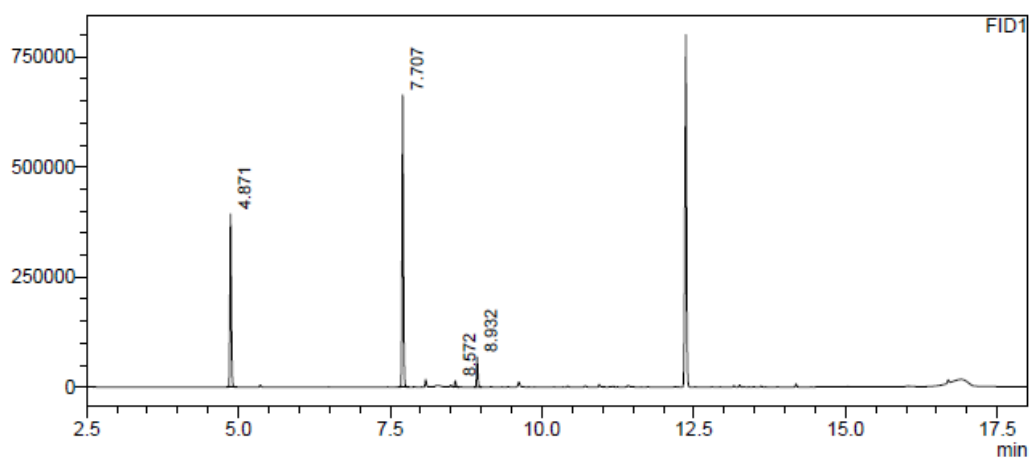

FID1

| Peak# | Ret. Time | Area    | Area%   |
|-------|-----------|---------|---------|
| 1     | 4.871     | 610780  | 35.205  |
| 2     | 7.707     | 1006681 | 58.024  |
| 3     | 8.572     | 19931   | 1.149   |
| 4     | 8.932     | 97548   | 5.623   |
| Total |           | 1734939 | 100.000 |

Sample Name : t=72\_SOD\_831  
 Sample ID :  
 Data Filename : t=72\_SOD\_831.gcd  
 Method Filename : Methode\_Achiral\_MUC\_Integration.gcm  
 Batch Filename : batch.gcb  
 Vial # : 5  
 Injection Volume : 5 uL  
 Date Acquired : 23.08.2019 18:19:24  
 Date Processed : 23.08.2019 18:40:07

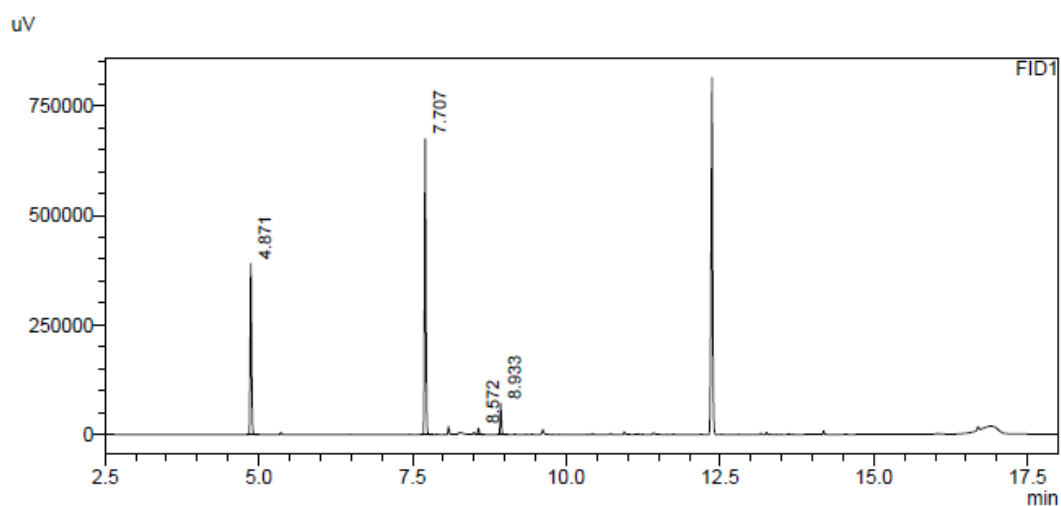

| Peak# | Ret. Time | Area    | Area%   |
|-------|-----------|---------|---------|
| 1     | 4.871     | 617446  | 35.142  |
| 2     | 7.707     | 1015907 | 57.821  |
| 3     | 8.572     | 20783   | 1.183   |
| 4     | 8.933     | 102845  | 5.854   |
| Total |           | 1756981 | 100.000 |

Sample Name : t=72\_SOD\_832  
Sample ID :  
Data Filename : t=72\_SOD\_832.gcd  
Method Filename : Methode\_Achiral\_MUC\_Integration.gcm  
Batch Filename : batch.gcb  
Vial # : 6  
Injection Volume : 5 uL  
Date Acquired : 23.08.2019 18:44:51  
Date Processed : 23.08.2019 19:05:33

uV

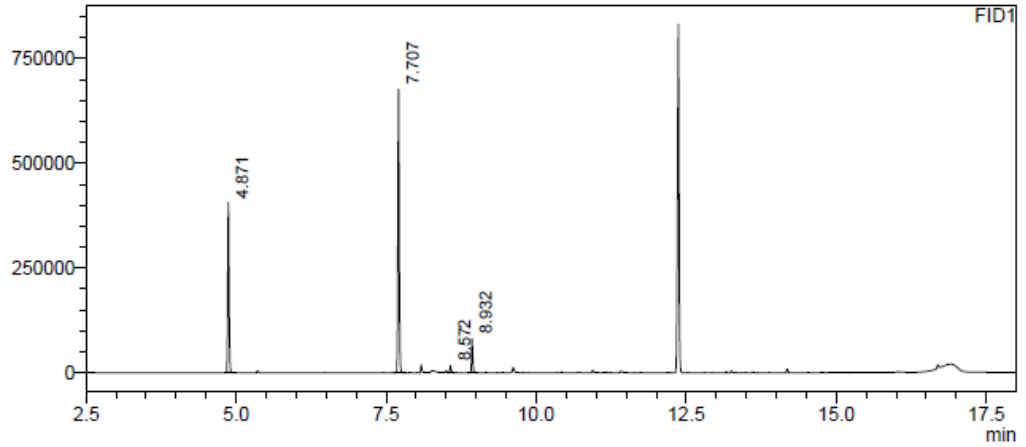

FID1

| Peak# | Ret. Time | Area    | Area%   |
|-------|-----------|---------|---------|
| 1     | 4.871     | 637736  | 35.190  |
| 2     | 7.707     | 1035322 | 57.129  |
| 3     | 8.572     | 21761   | 1.201   |
| 4     | 8.932     | 117441  | 6.480   |
| Total |           | 1812260 | 100.000 |

I, no *i*PrOH

t = 0 min

Sample Name : t=0\_827-832  
Sample ID :  
Data Filename : t=0.gcd  
Method Filename : Methode\_Achiral\_MUC\_Integration.gcm  
Batch Filename : batch.gcb  
Vial # : 1  
Injection Volume : 5 uL  
Date Acquired : 20.08.2019 11:36:22  
Date Processed : 20.08.2019 11:57:06

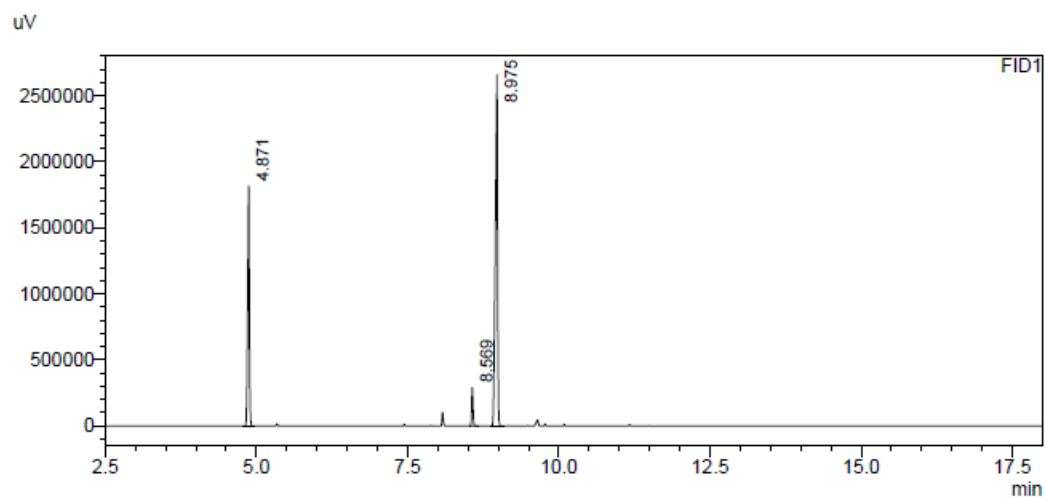

| Peak# | Ret. Time | Area     | Area%   |
|-------|-----------|----------|---------|
| 1     | 4.871     | 3483890  | 32.788  |
| 2     | 8.569     | 428601   | 4.034   |
| 3     | 8.975     | 6712874  | 63.178  |
| Total |           | 10625365 | 100.000 |



t = 24 h

Sample Name : t=24\_SOD\_827  
Sample ID :  
Data Filename : t=24\_SOD\_827.gcd  
Method Filename : Methode\_Achiral\_MUC\_Integration.gcm  
Batch Filename : batch.gcb  
Vial # : 1  
Injection Volume : 5 uL  
Date Acquired : 21.08.2019 12:41:18  
Date Processed : 21.08.2019 13:02:03

uV

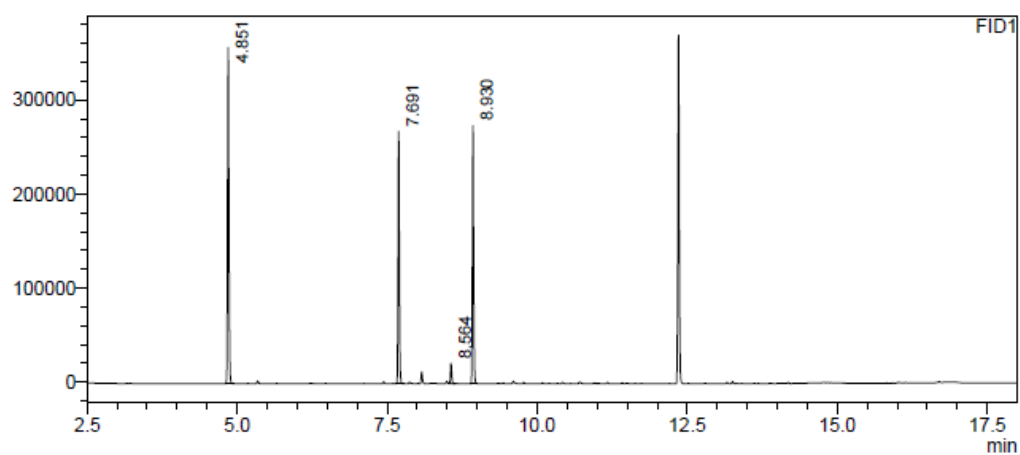

| Peak# | Ret. Time | Area    | Area%   |
|-------|-----------|---------|---------|
| 1     | 4.851     | 563742  | 40.689  |
| 2     | 7.691     | 394645  | 28.484  |
| 3     | 8.564     | 30851   | 2.227   |
| 4     | 8.930     | 396246  | 28.600  |
| Total |           | 1385484 | 100.000 |

Sample Name : t=24\_SOD\_828  
 Sample ID :  
 Data Filename : t=24\_SOD\_828.gcd  
 Method Filename : Méthode\_Achiral\_MUC\_Integration.gcm  
 Batch Filename : batch.gcb  
 Vial # : 2  
 Injection Volume : 5 uL  
 Date Acquired : 21.08.2019 13:06:36  
 Date Processed : 21.08.2019 13:27:18

uV

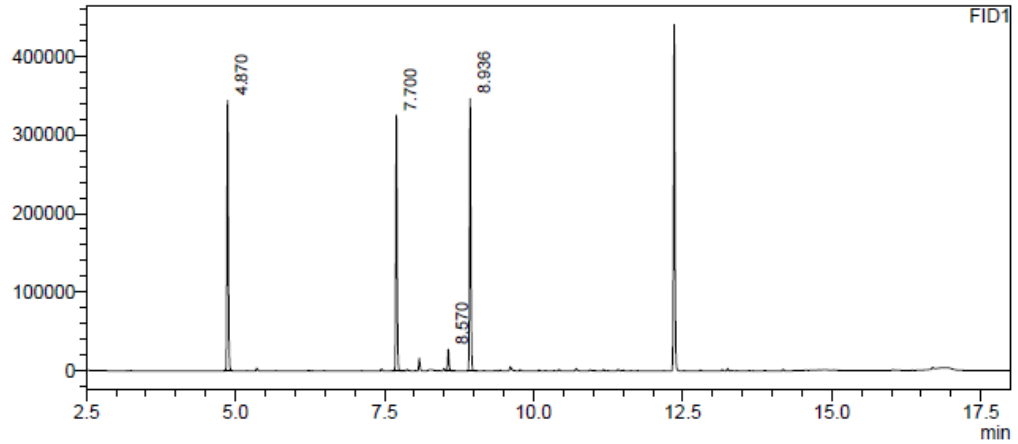

FID1

| Peak# | Ret. Time | Area    | Area%   |
|-------|-----------|---------|---------|
| 1     | 4.870     | 550771  | 34.895  |
| 2     | 7.700     | 482323  | 30.559  |
| 3     | 8.570     | 38311   | 2.427   |
| 4     | 8.936     | 506944  | 32.119  |
| Total |           | 1578348 | 100.000 |

Sample Name : t=24\_SOD\_829  
 Sample ID :  
 Data Filename : t=24\_SOD\_829.gcd  
 Method Filename : Methode\_Achiral\_MUC\_Integration.gcm  
 Batch Filename : batch.gcb  
 Vial # : 3  
 Injection Volume : 5 uL  
 Date Acquired : 21.08.2019 13:31:56  
 Date Processed : 21.08.2019 13:52:39

uV

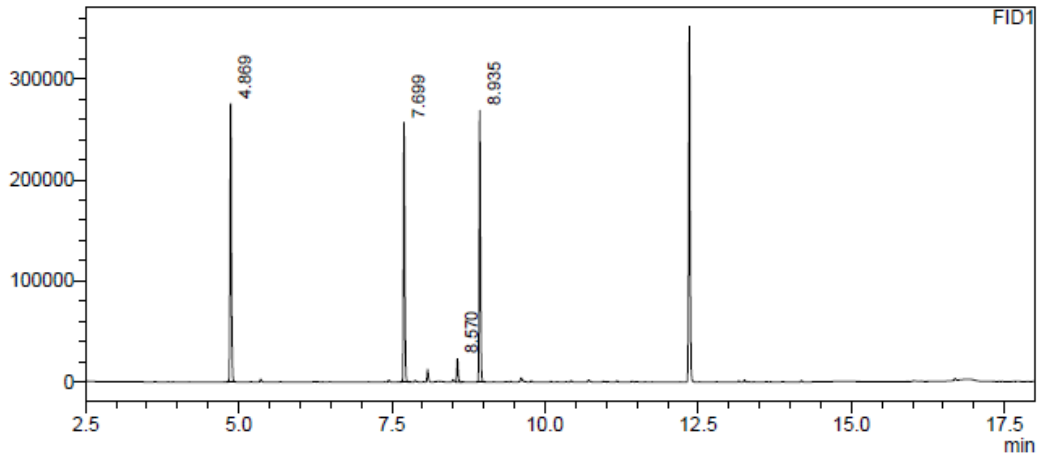

FID1

| Peak# | Ret. Time | Area    | Area%   |
|-------|-----------|---------|---------|
| 1     | 4.869     | 427419  | 34.955  |
| 2     | 7.699     | 374348  | 30.615  |
| 3     | 8.570     | 33024   | 2.701   |
| 4     | 8.935     | 387971  | 31.729  |
| Total |           | 1222763 | 100.000 |

t = 48 h

Sample Name : t=48\_SOD\_827  
Sample ID :  
Data Filename : t=48\_SOD\_827.gcd  
Method Filename : Methode\_Achiral\_MUC\_Integration.gcm  
Batch Filename : batch.gcb  
Vial # : 1  
Injection Volume : 5 uL  
Date Acquired : 22.08.2019 12:52:34  
Date Processed : 22.08.2019 13:13:16

uV

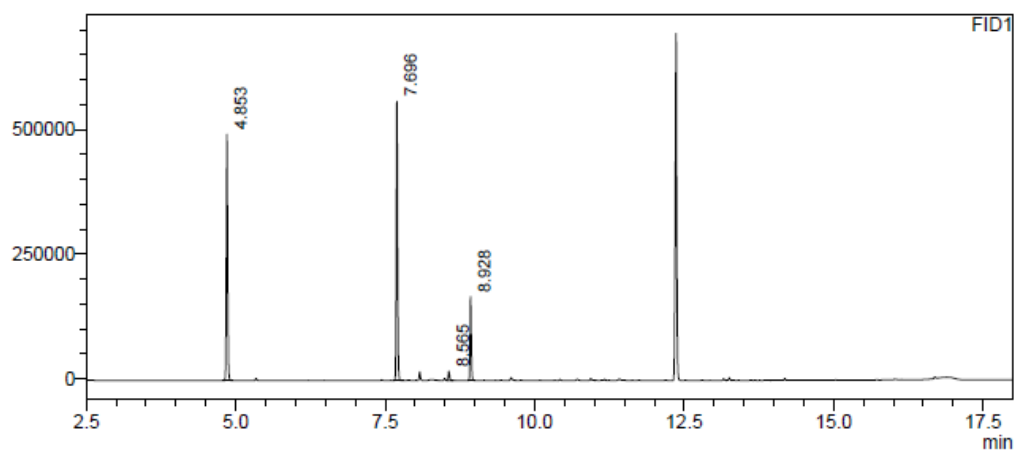

| Peak# | Ret. Time | Area    | Area%   |
|-------|-----------|---------|---------|
| 1     | 4.853     | 773717  | 41.150  |
| 2     | 7.696     | 836938  | 44.513  |
| 3     | 8.565     | 26562   | 1.413   |
| 4     | 8.928     | 243009  | 12.924  |
| Total |           | 1880227 | 100.000 |

Sample Name : t=48\_SOD\_828  
 Sample ID :  
 Data Filename : t=48\_SOD\_828.gcd  
 Method Filename : Methode\_Achiral\_MUC\_Integration.gcm  
 Batch Filename : batch.gcb  
 Vial # : 2  
 Injection Volume : 5 uL  
 Date Acquired : 22.08.2019 13:17:53  
 Date Processed : 22.08.2019 13:38:37

uV

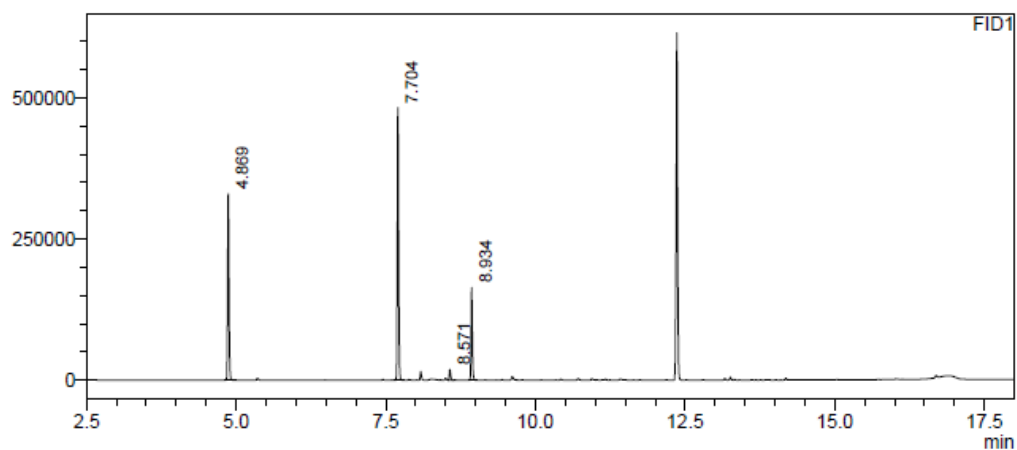

FID1

| Peak# | Ret. Time | Area    | Area%   |
|-------|-----------|---------|---------|
| 1     | 4.869     | 523364  | 34.548  |
| 2     | 7.704     | 727472  | 48.022  |
| 3     | 8.571     | 27245   | 1.798   |
| 4     | 8.934     | 236792  | 15.631  |
| Total |           | 1514873 | 100.000 |

Sample Name : t=48\_SOD\_829  
Sample ID :  
Data Filename : t=48\_SOD\_829.gcd  
Method Filename : Methode\_Achiral\_MUC\_Integration.gcm  
Batch Filename : batch.gcb  
Vial # : 3  
Injection Volume : 5 uL  
Date Acquired : 22.08.2019 13:43:18  
Date Processed : 22.08.2019 14:04:00

uV

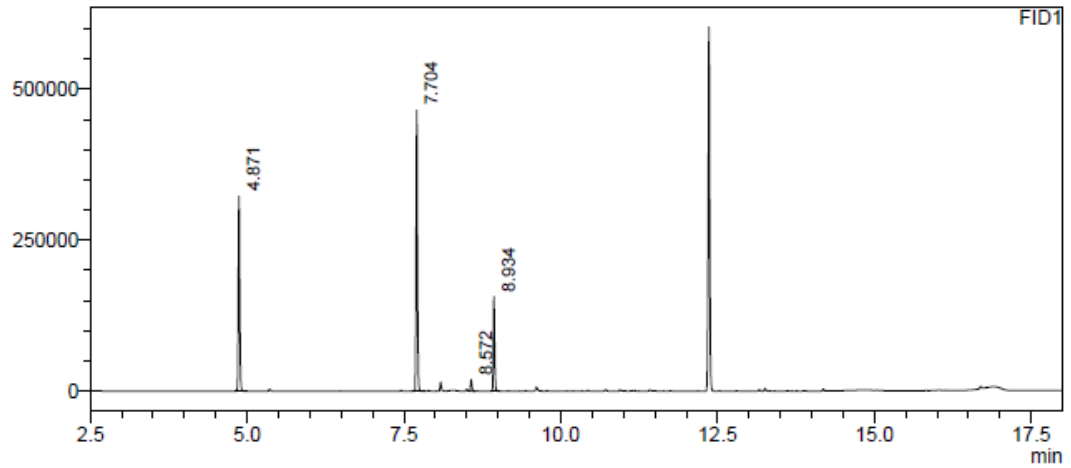

FID1

| Peak# | Ret. Time | Area    | Area%   |
|-------|-----------|---------|---------|
| 1     | 4.871     | 506749  | 34.802  |
| 2     | 7.704     | 698213  | 47.951  |
| 3     | 8.572     | 26822   | 1.842   |
| 4     | 8.934     | 224304  | 15.405  |
| Total |           | 1456088 | 100.000 |

t = 72 h

Sample Name : t=72\_SOD\_827  
Sample ID :  
Data Filename : t=72\_SOD\_827.gcd  
Method Filename : Methode\_Achiral\_MUC\_Integration.gcm  
Batch Filename : batch.gcb  
Vial # : 1  
Injection Volume : 5 uL  
Date Acquired : 23.08.2019 16:37:49  
Date Processed : 23.08.2019 16:58:32

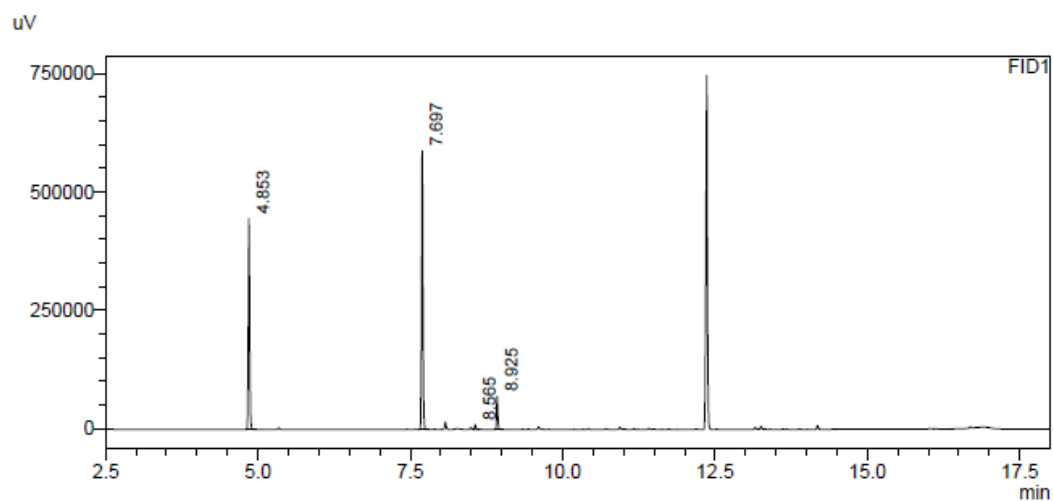

FID1

| Peak# | Ret. Time | Area    | Area%   |
|-------|-----------|---------|---------|
| 1     | 4.853     | 701244  | 40.986  |
| 2     | 7.697     | 893663  | 52.233  |
| 3     | 8.565     | 14867   | 0.869   |
| 4     | 8.925     | 101156  | 5.912   |
| Total |           | 1710931 | 100.000 |

Sample Name : t=72\_SOD\_828  
 Sample ID :  
 Data Filename : t=72\_SOD\_828.gcd  
 Method Filename : Methode\_Achiral\_MUC\_Integration.gcm  
 Batch Filename : batch.gcb  
 Vial # : 2  
 Injection Volume : 5 uL  
 Date Acquired : 23.08.2019 17:03:12  
 Date Processed : 23.08.2019 17:23:54

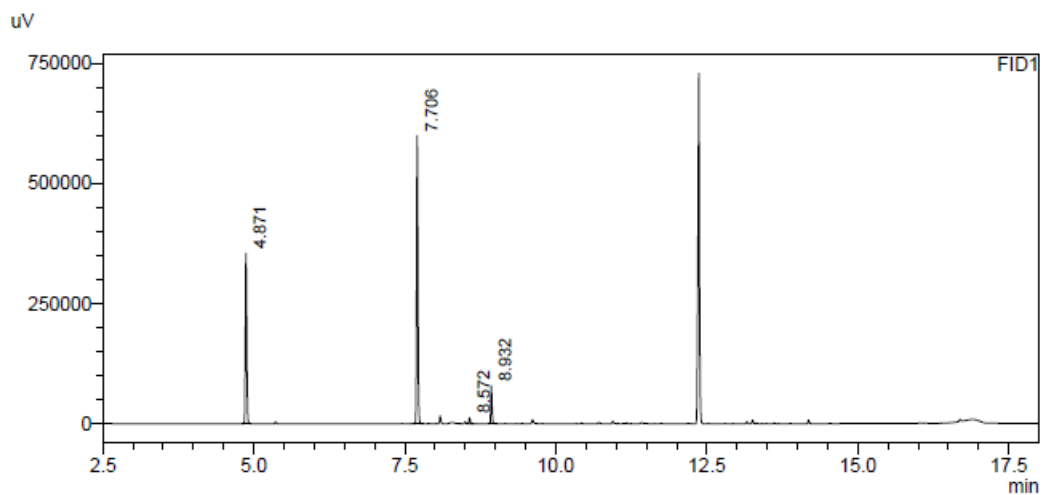

FID1

| Peak# | Ret. Time | Area    | Area%   |
|-------|-----------|---------|---------|
| 1     | 4.871     | 553790  | 34.999  |
| 2     | 7.706     | 898489  | 56.783  |
| 3     | 8.572     | 16718   | 1.057   |
| 4     | 8.932     | 113320  | 7.162   |
| Total |           | 1582317 | 100.000 |



Sample Name : t=72\_SOD\_829  
 Sample ID :  
 Data Filename : t=72\_SOD\_829.gcd  
 Method Filename : Methode\_Achiral\_MUC\_Integration.gcm  
 Batch Filename : batch.gcb  
 Vial # : 3  
 Injection Volume : 5 uL  
 Date Acquired : 23.08.2019 17:28:35  
 Date Processed : 23.08.2019 17:49:18

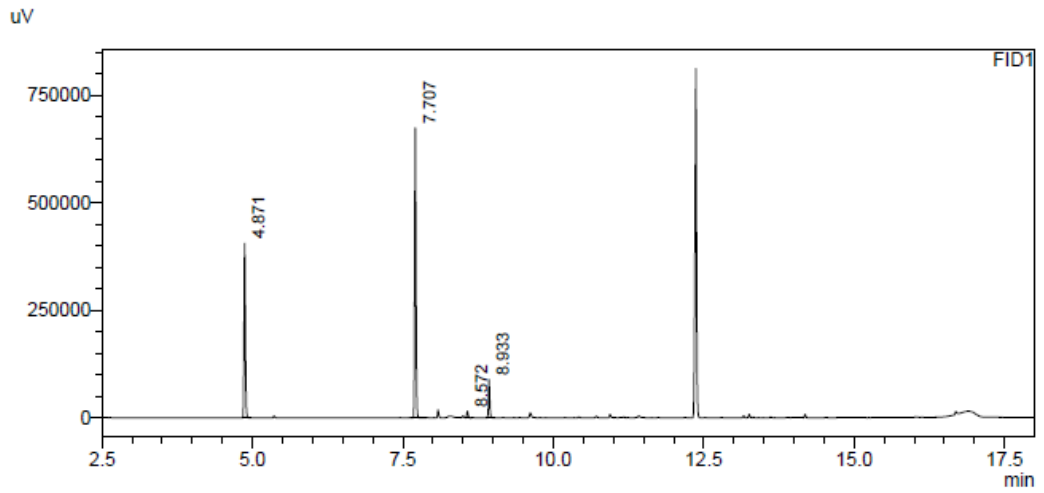

FID1

| Peak# | Ret. Time | Area    | Area%   |
|-------|-----------|---------|---------|
| 1     | 4.871     | 631112  | 35.172  |
| 2     | 7.707     | 1012699 | 56.438  |
| 3     | 8.572     | 21120   | 1.177   |
| 4     | 8.933     | 129413  | 7.212   |
| Total |           | 1794344 | 100.000 |

No I, *i*PrOH

t = 0 min

Sample Name : t=0\_SOD-1045  
Sample ID :  
Data Filename : t=0\_SOD-1045.gcd  
Method Filename : Methode\_Achiral\_MUC\_Integration.gcm  
Batch Filename : achiralGC.gcb  
Vial # : 4  
Injection Volume : 5 uL  
Date Acquired : 27.02.2020 20:01:14  
Date Processed : 27.02.2020 20:21:57

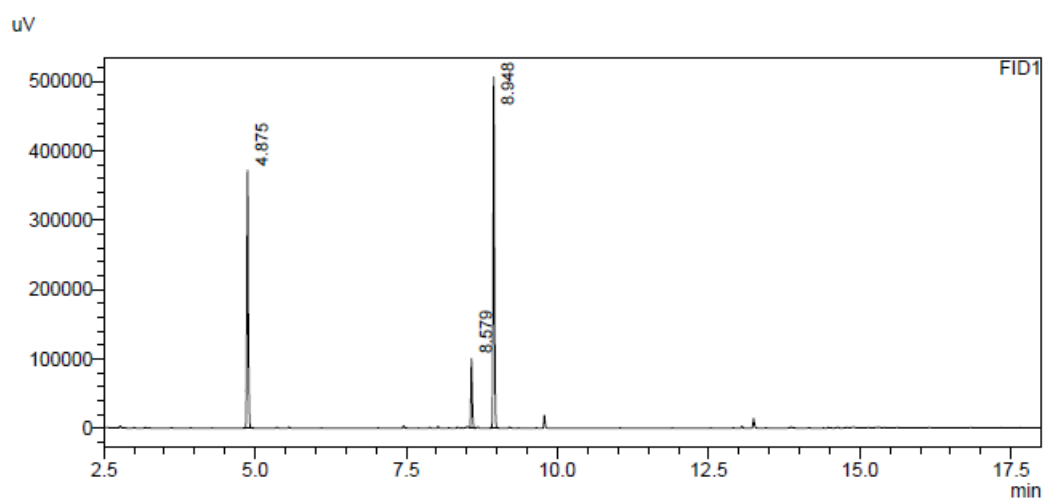

FID1

| Peak# | Ret. Time | Area    | Area%   |
|-------|-----------|---------|---------|
| 1     | 4.875     | 596337  | 39.871  |
| 2     | 8.579     | 146595  | 9.801   |
| 3     | 8.948     | 752725  | 50.327  |
| Total |           | 1495657 | 100.000 |

Sample Name : t=0\_SOD-1046  
Sample ID :  
Data Filename : t=0\_SOD-1046.gcd  
Method Filename : Methode\_Achiral\_MUC\_Integration.gcm  
Batch Filename : achiralGC.gcb  
Vial # : 5  
Injection Volume : 5 uL  
Date Acquired : 27.02.2020 20:26:38  
Date Processed : 27.02.2020 20:47:23

uV

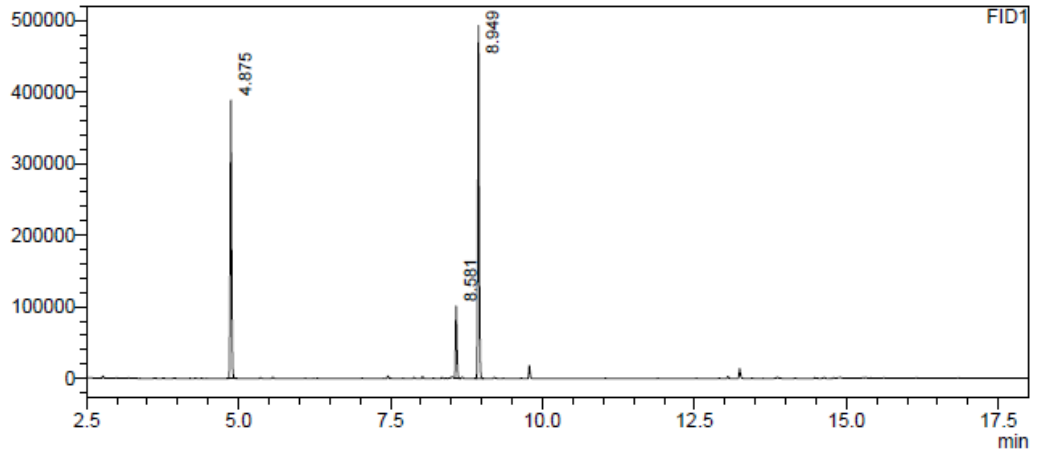

FID1

| Peak# | Ret. Time | Area    | Area%   |
|-------|-----------|---------|---------|
| 1     | 4.875     | 606304  | 40.601  |
| 2     | 8.581     | 146600  | 9.817   |
| 3     | 8.949     | 740421  | 49.582  |
| Total |           | 1493325 | 100.000 |

Sample Name : t=0\_SOD-1047  
 Sample ID :  
 Data Filename : t=0\_SOD-1047.gcd  
 Method Filename : Methode\_Achiral\_MUC\_Integration.gcm  
 Batch Filename : achiralGC.gcb  
 Vial # : 6  
 Injection Volume : 5 uL  
 Date Acquired : 27.02.2020 20:51:57  
 Date Processed : 27.02.2020 21:12:41

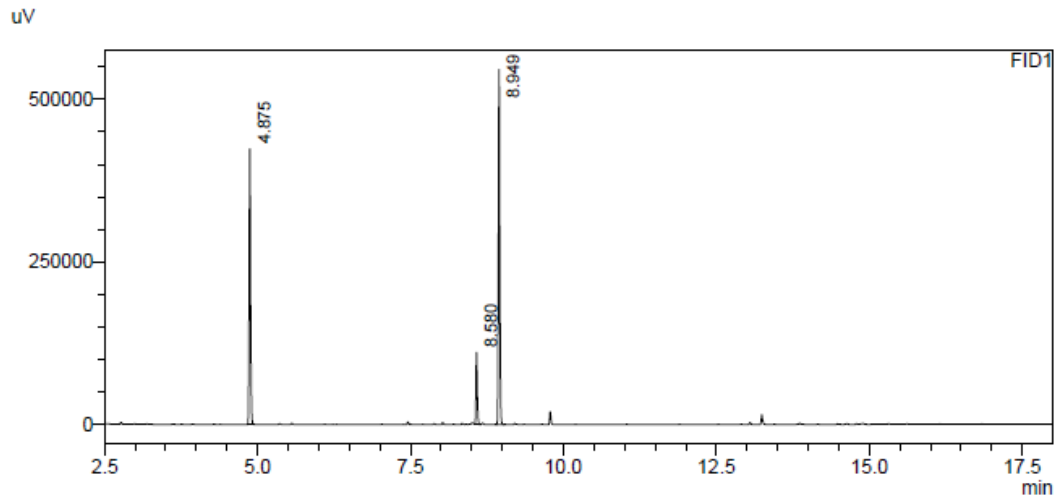

| Peak# | Ret. Time | Area    | Area%   |
|-------|-----------|---------|---------|
| 1     | 4.875     | 664477  | 40.552  |
| 2     | 8.580     | 161294  | 9.844   |
| 3     | 8.949     | 812797  | 49.604  |
| Total |           | 1638569 | 100.000 |

t = 24 h

Sample Name : t=24\_SOD-1045  
Sample ID :  
Data Filename : t=24\_SOD-1045.gcd  
Method Filename : Methode\_Achiral\_MUC\_Integration.gcm  
Batch Filename : achiralGC.gcb  
Vial # : 4  
Injection Volume : 5 uL  
Date Acquired : 28.02.2020 12:57:01  
Date Processed : 28.02.2020 13:17:44

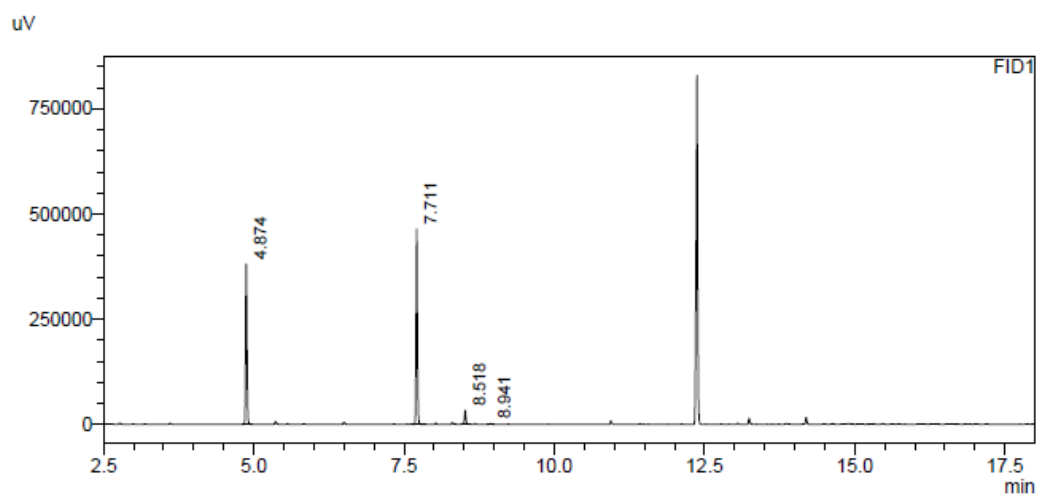

FID1

| Peak# | Ret. Time | Area    | Area%   |
|-------|-----------|---------|---------|
| 1     | 4.874     | 603264  | 44.792  |
| 2     | 7.711     | 692405  | 51.411  |
| 3     | 8.518     | 48749   | 3.620   |
| 4     | 8.941     | 2391    | 0.178   |
| Total |           | 1346809 | 100.000 |

Sample Name : t=24\_SOD-1046  
Sample ID :  
Data Filename : t=24\_SOD-1046.gcd  
Method Filename : Methode\_Achiral\_MUC\_Integration.gcm  
Batch Filename : achiralGC.gcb  
Vial # : 5  
Injection Volume : 5 uL  
Date Acquired : 28.02.2020 13:22:21  
Date Processed : 28.02.2020 13:43:05

uV

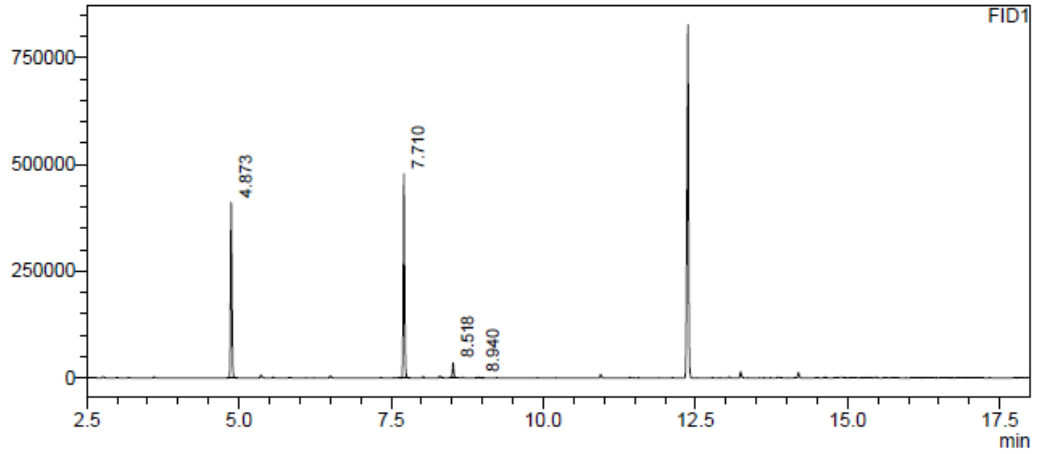

| Peak# | Ret. Time | Area    | Area%   |
|-------|-----------|---------|---------|
| 1     | 4.873     | 626766  | 45.437  |
| 2     | 7.710     | 698864  | 50.664  |
| 3     | 8.518     | 51125   | 3.706   |
| 4     | 8.940     | 2649    | 0.192   |
| Total |           | 1379405 | 100.000 |

Sample Name : t=24\_SOD-1047  
Sample ID :  
Data Filename : t=24\_SOD-1047.gcd  
Method Filename : Methode\_Achiral\_MUC\_Integration.gcm  
Batch Filename : achiralGC.gcb  
Vial # : 6  
Injection Volume : 5 uL  
Date Acquired : 28.02.2020 13:47:38  
Date Processed : 28.02.2020 14:08:22

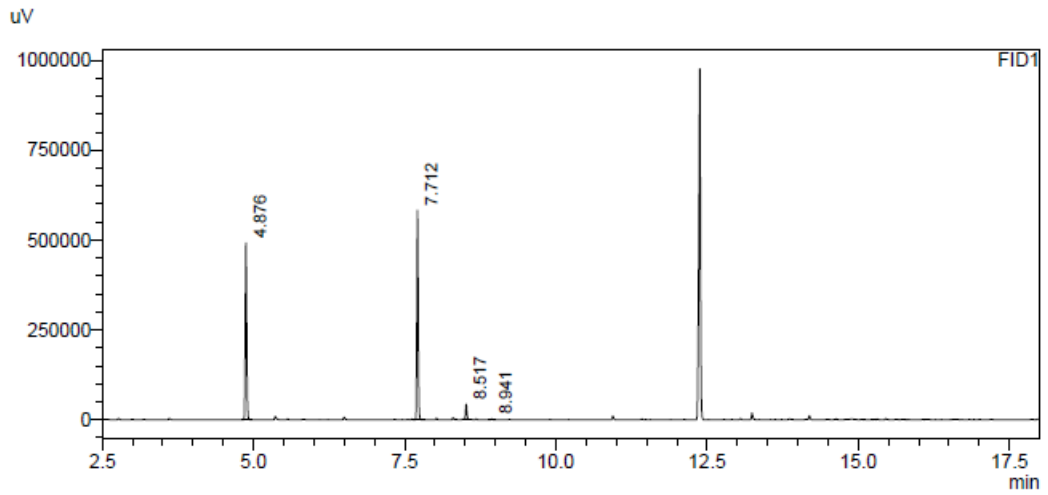

FID1

| Peak# | Ret. Time | Area    | Area%   |
|-------|-----------|---------|---------|
| 1     | 4.876     | 791043  | 45.819  |
| 2     | 7.712     | 869488  | 50.362  |
| 3     | 8.517     | 62679   | 3.631   |
| 4     | 8.941     | 3252    | 0.188   |
| Total |           | 1726463 | 100.000 |

t = 48 h

Sample Name : t=48\_SOD-1045  
Sample ID :  
Data Filename : t=48\_SOD-1045.gcd  
Method Filename : Methode\_Achiral\_MUC\_Integration.gcm  
Batch Filename : achiralGC.gcb  
Vial # : 10  
Injection Volume : 5 uL  
Date Acquired : 28.02.2020 15:30:02  
Date Processed : 28.02.2020 15:50:45

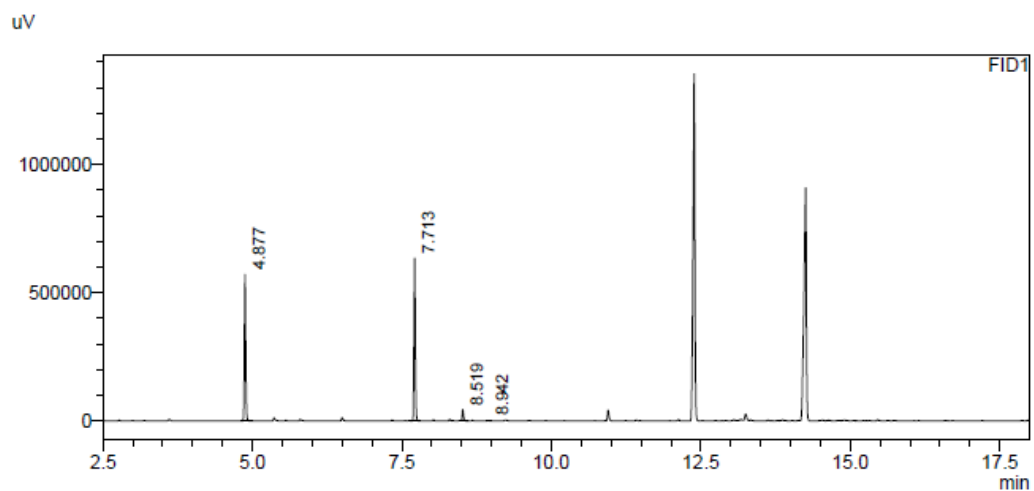

FID1

| Peak# | Ret. Time | Area    | Area%   |
|-------|-----------|---------|---------|
| 1     | 4.877     | 888418  | 45.924  |
| 2     | 7.713     | 977192  | 50.513  |
| 3     | 8.519     | 66045   | 3.414   |
| 4     | 8.942     | 2868    | 0.148   |
| Total |           | 1934523 | 100.000 |



Sample Name : t=48\_SOD-1046  
 Sample ID :  
 Data Filename : t=48\_SOD-1046.gcd  
 Method Filename : Methode\_Achiral\_MUC\_Integration.gcm  
 Batch Filename : achiralGC.gcb  
 Vial # : 11  
 Injection Volume : 5 uL  
 Date Acquired : 28.02.2020 15:55:22  
 Date Processed : 28.02.2020 16:16:05

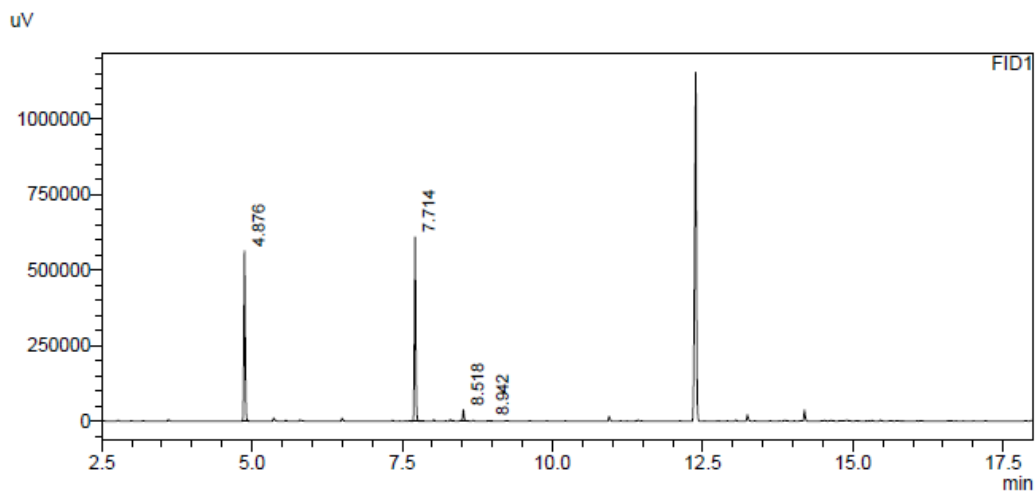

| Peak# | Ret. Time | Area    | Area%   |
|-------|-----------|---------|---------|
| 1     | 4.876     | 872985  | 46.967  |
| 2     | 7.714     | 927869  | 49.920  |
| 3     | 8.518     | 55322   | 2.976   |
| 4     | 8.942     | 2535    | 0.136   |
| Total |           | 1858711 | 100.000 |

Sample Name : t=48\_SOD-1047  
Sample ID :  
Data Filename : t=48\_SOD-1047.gcd  
Method Filename : Methode\_Achiral\_MUC\_Integration.gcm  
Batch Filename : achiralGC.gcb  
Vial # : 12  
Injection Volume : 5 uL  
Date Acquired : 28.02.2020 16:20:41  
Date Processed : 28.02.2020 16:41:25

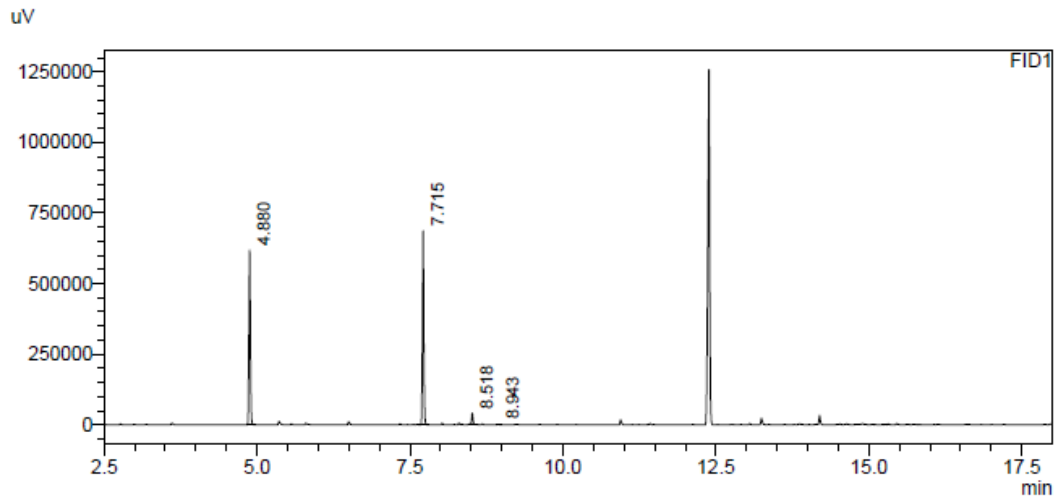

FID1

| Peak# | Ret. Time | Area    | Area%   |
|-------|-----------|---------|---------|
| 1     | 4.880     | 996886  | 47.435  |
| 2     | 7.715     | 1042047 | 49.584  |
| 3     | 8.518     | 59479   | 2.830   |
| 4     | 8.943     | 3183    | 0.151   |
| Total |           | 2101595 | 100.000 |

t = 72 h

Sample Name : t=72\_SOD-1045  
Sample ID :  
Data Filename : t=72\_SOD-1045.gcd  
Method Filename : Methode\_Achiral\_MUC\_Integration.gcm  
Batch Filename : achiralGC.gcb  
Vial # : 4  
Injection Volume : 5 uL  
Date Acquired : 03.03.2020 16:06:24  
Date Processed : 03.03.2020 16:27:07

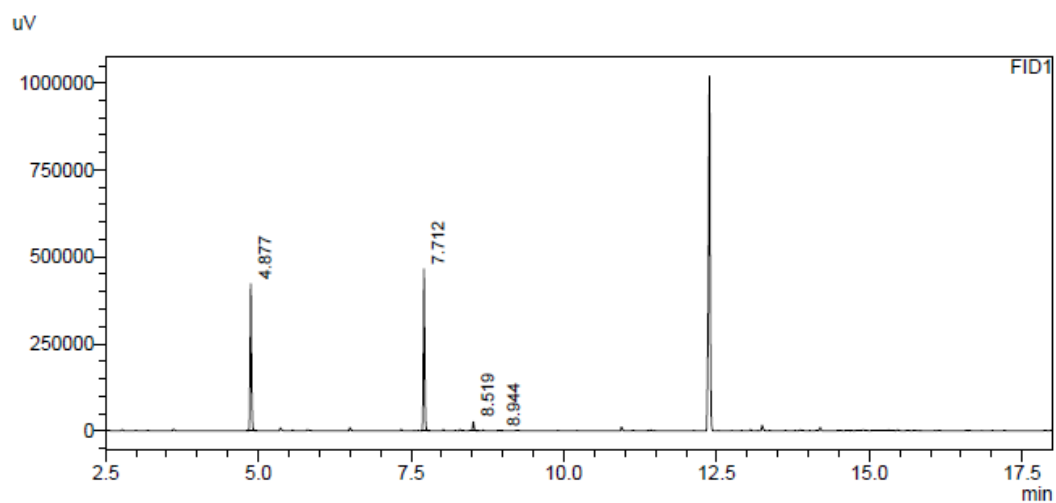

FID1

| Peak# | Ret. Time | Area    | Area%   |
|-------|-----------|---------|---------|
| 1     | 4.877     | 659321  | 47.656  |
| 2     | 7.712     | 685538  | 49.551  |
| 3     | 8.519     | 36737   | 2.655   |
| 4     | 8.944     | 1915    | 0.138   |
| Total |           | 1383511 | 100.000 |

Sample Name : t=72\_SOD-1046  
Sample ID :  
Data Filename : t=72\_SOD-1046.gcd  
Method Filename : Methode\_Achiral\_MUC\_Integration.gcm  
Batch Filename : achiralGC.gcb  
Vial # : 5  
Injection Volume : 5 uL  
Date Acquired : 03.03.2020 16:31:40  
Date Processed : 03.03.2020 16:52:24

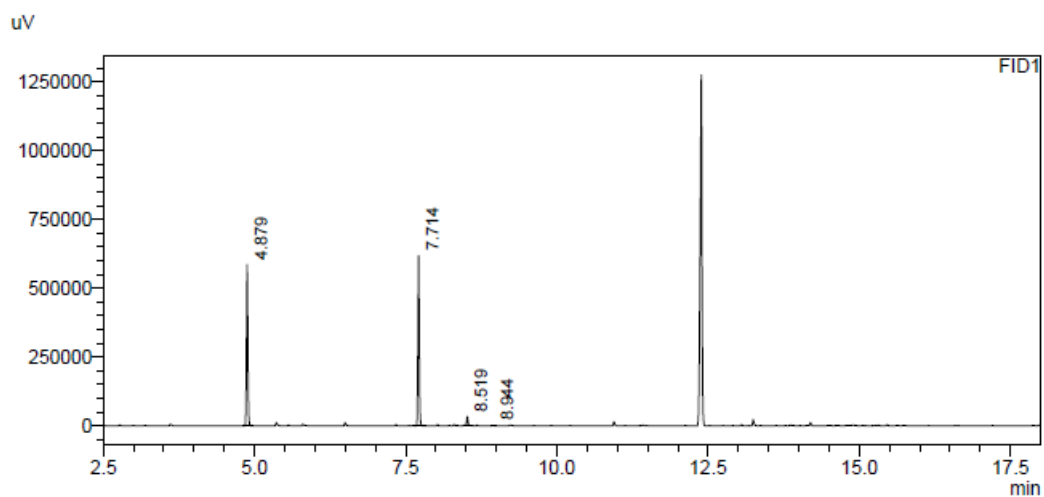

FID1

| Peak# | Ret. Time | Area    | Area%   |
|-------|-----------|---------|---------|
| 1     | 4.879     | 925143  | 48.375  |
| 2     | 7.714     | 935404  | 48.911  |
| 3     | 8.519     | 49115   | 2.568   |
| 4     | 8.944     | 2786    | 0.146   |
| Total |           | 1912448 | 100.000 |

Sample Name : t=72\_SOD-1047  
Sample ID :  
Data Filename : t=72\_SOD-1047.gcd  
Method Filename : Methode\_Achiral\_MUC\_Integration.gcm  
Batch Filename : achiralGC.gcb  
Vial # : 6  
Injection Volume : 5 uL  
Date Acquired : 03.03.2020 16:57:03  
Date Processed : 03.03.2020 17:17:48

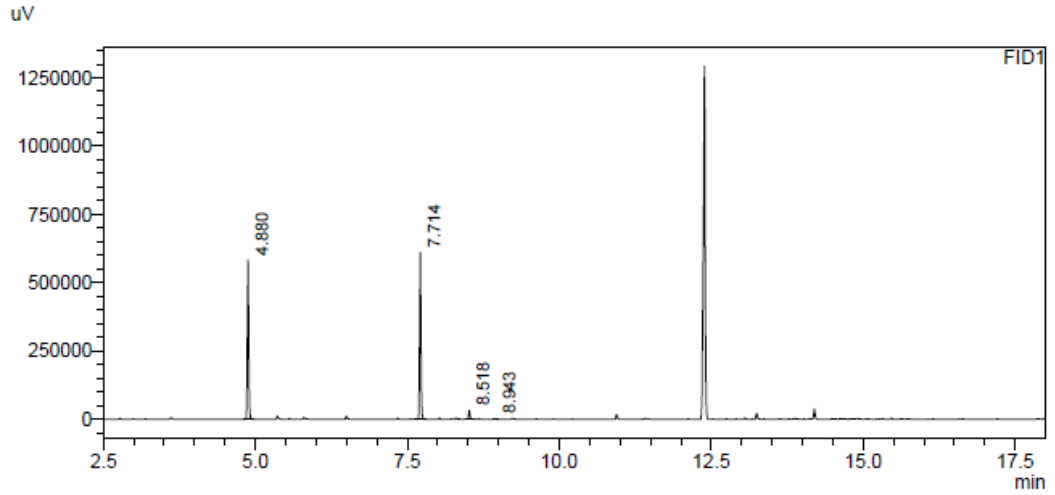

FID1

| Peak# | Ret. Time | Area    | Area%   |
|-------|-----------|---------|---------|
| 1     | 4.880     | 927757  | 48.710  |
| 2     | 7.714     | 927819  | 48.713  |
| 3     | 8.518     | 46277   | 2.430   |
| 4     | 8.943     | 2807    | 0.147   |
| Total |           | 1904659 | 100.000 |

No I, no *i*PrOH

**t = 0 min**

Sample Name : t=0\_SOD-1042  
Sample ID :  
Data Filename : t=0\_SOD-1042.gcd  
Method Filename : Methode\_Achiral\_MUC\_Integration.gcm  
Batch Filename : achiralGC.gcb  
Vial # : 1  
Injection Volume : 5 uL  
Date Acquired : 27.02.2020 18:45:08  
Date Processed : 27.02.2020 19:05:52

uV

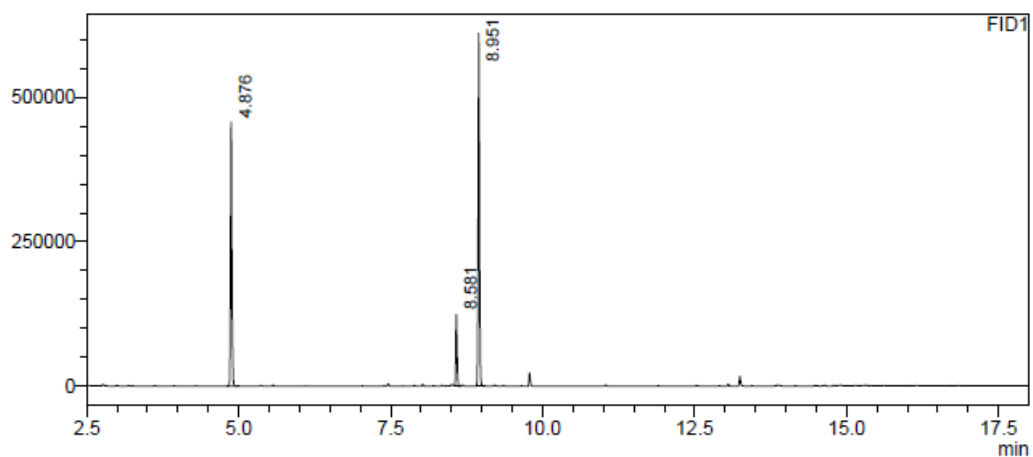

FID1

| Peak# | Ret. Time | Area    | Area%   |
|-------|-----------|---------|---------|
| 1     | 4.876     | 719885  | 39.521  |
| 2     | 8.581     | 178235  | 9.785   |
| 3     | 8.951     | 923383  | 50.693  |
| Total |           | 1821503 | 100.000 |

Sample Name : t=0\_SOD-1043  
Sample ID :  
Data Filename : t=0\_SOD-1043.gcd  
Method Filename : Methode\_Achiral\_MUC\_Integration.gcm  
Batch Filename : achiralGC.gcb  
Vial # : 2  
Injection Volume : 5 uL  
Date Acquired : 27.02.2020 19:10:28  
Date Processed : 27.02.2020 19:31:12

uV

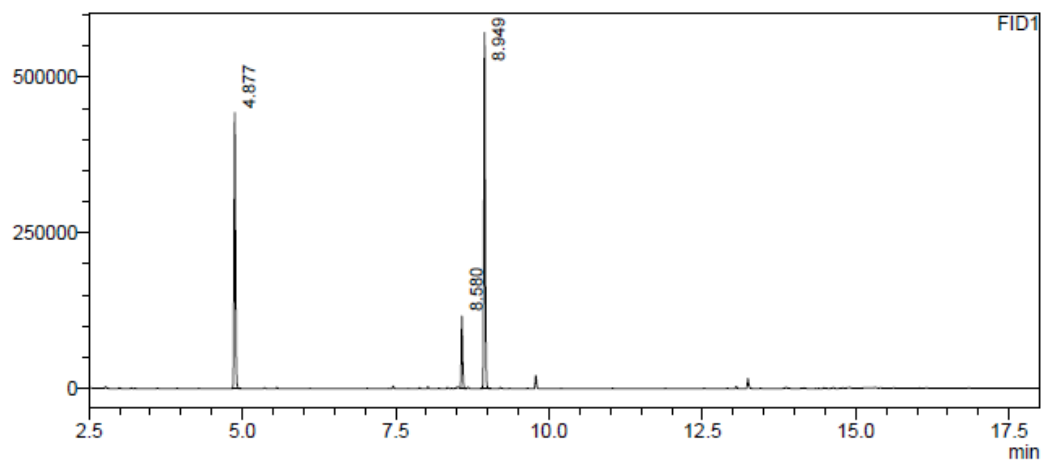

FID1

| Peak# | Ret. Time | Area    | Area%   |
|-------|-----------|---------|---------|
| 1     | 4.877     | 704215  | 40.721  |
| 2     | 8.580     | 166086  | 9.604   |
| 3     | 8.949     | 859080  | 49.676  |
| Total |           | 1729381 | 100.000 |

Sample Name : t=0\_SOD-1044  
Sample ID :  
Data Filename : t=0\_SOD-1044.gcd  
Method Filename : Methode\_Achiral\_MUC\_Integration.gcm  
Batch Filename : achiralGC.gcb  
Vial # : 3  
Injection Volume : 5 uL  
Date Acquired : 27.02.2020 19:35:50  
Date Processed : 27.02.2020 19:56:33

uV

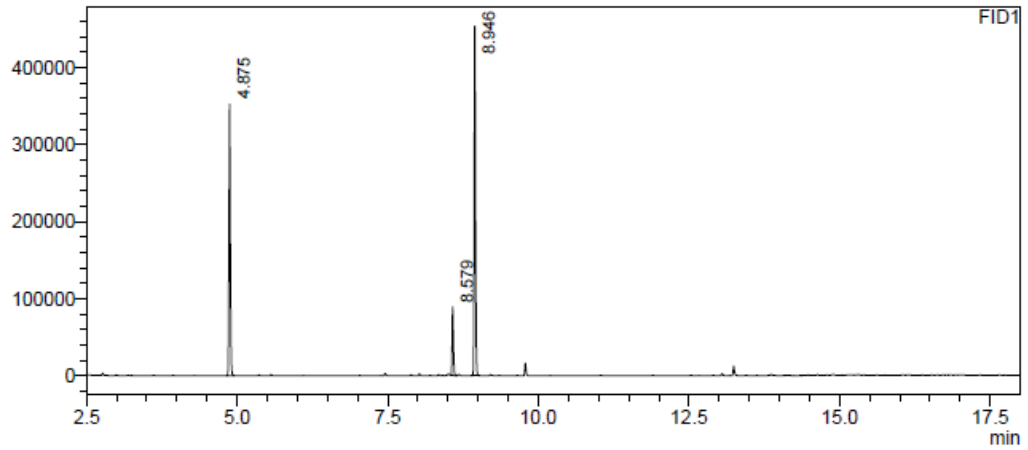

FID1

| Peak# | Ret. Time | Area    | Area%   |
|-------|-----------|---------|---------|
| 1     | 4.875     | 550781  | 41.032  |
| 2     | 8.579     | 128662  | 9.585   |
| 3     | 8.946     | 662881  | 49.383  |
| Total |           | 1342325 | 100.000 |



t = 24 h

Sample Name : t=24\_SOD-1042  
Sample ID :  
Data Filename : t=24\_SOD-1042.gcd  
Method Filename : Methode\_Achiral\_MUC\_Integration.gcm  
Batch Filename : achiralGC.gcb  
Vial # : 1  
Injection Volume : 5 uL  
Date Acquired : 28.02.2020 10:25:02  
Date Processed : 28.02.2020 10:45:47

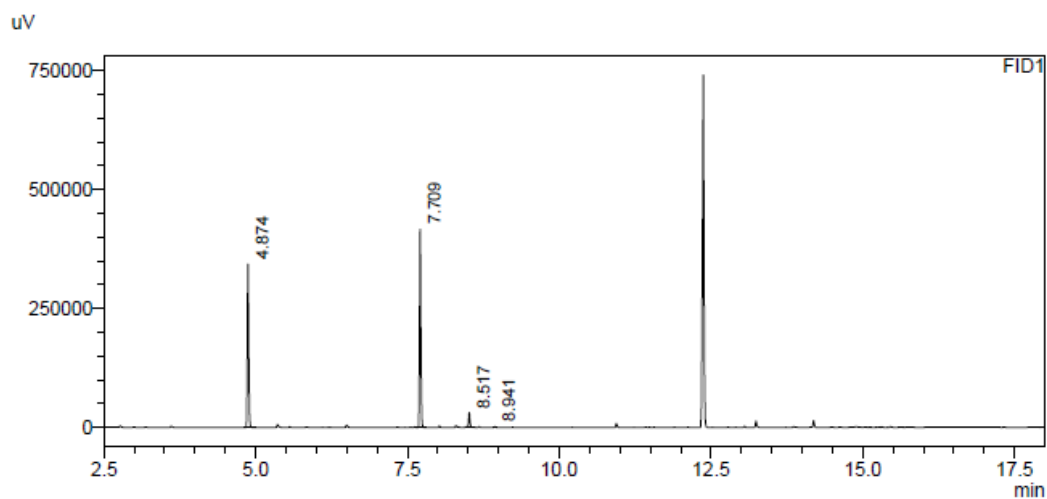

| Peak# | Ret. Time | Area    | Area%   |
|-------|-----------|---------|---------|
| 1     | 4.874     | 539126  | 44.927  |
| 2     | 7.709     | 613521  | 51.127  |
| 3     | 8.517     | 44996   | 3.750   |
| 4     | 8.941     | 2356    | 0.196   |
| Total |           | 1199999 | 100.000 |

Sample Name : t=24\_SOD-1043  
 Sample ID :  
 Data Filename : t=24\_SOD-1043.gcd  
 Method Filename : Methode\_Achiral\_MUC\_Integration.gcm  
 Batch Filename : achiralGC.gcb  
 Vial # : 2  
 Injection Volume : 5 uL  
 Date Acquired : 28.02.2020 10:50:18  
 Date Processed : 28.02.2020 11:11:01

uV

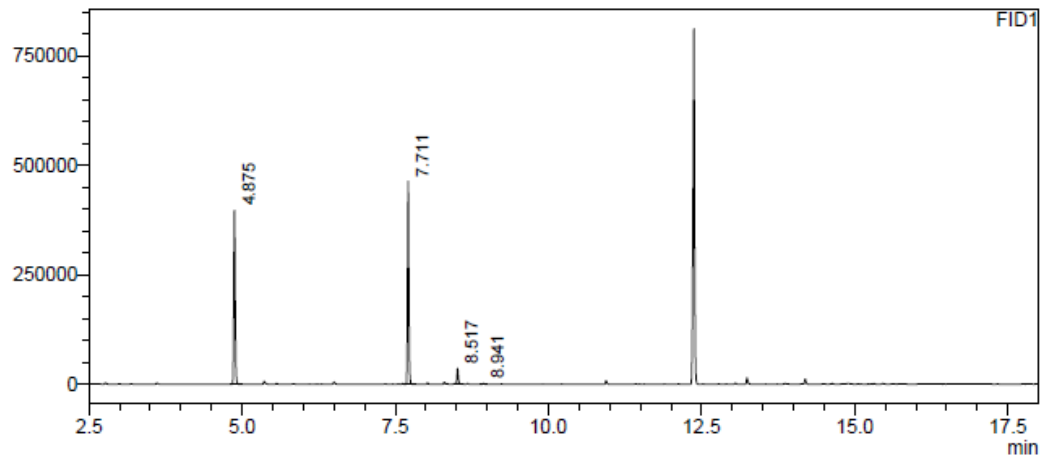

FID1

| Peak# | Ret. Time | Area    | Area%   |
|-------|-----------|---------|---------|
| 1     | 4.875     | 629243  | 45.709  |
| 2     | 7.711     | 691873  | 50.259  |
| 3     | 8.517     | 52878   | 3.841   |
| 4     | 8.941     | 2626    | 0.191   |
| Total |           | 1376619 | 100.000 |

Sample Name : t=24\_SOD-1044  
Sample ID :  
Data Filename : t=24\_SOD-1044.gcd  
Method Filename : Methode\_Achiral\_MUC\_Integration.gcm  
Batch Filename : achiralGC.gcb  
Vial # : 3  
Injection Volume : 5 uL  
Date Acquired : 28.02.2020 12:31:39  
Date Processed : 28.02.2020 12:52:23

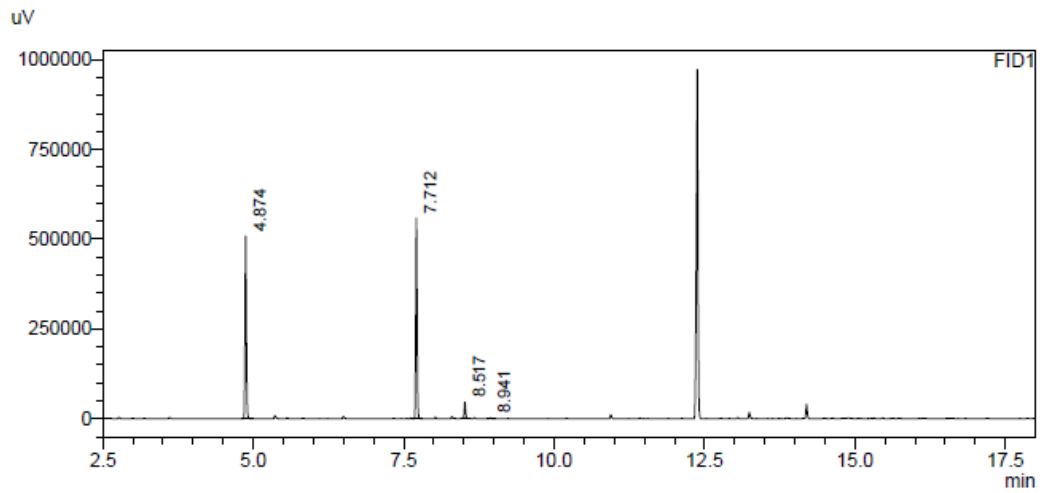

| Peak# | Ret. Time | Area    | Area%   |
|-------|-----------|---------|---------|
| 1     | 4.874     | 781810  | 46.049  |
| 2     | 7.712     | 846845  | 49.880  |
| 3     | 8.517     | 66185   | 3.898   |
| 4     | 8.941     | 2936    | 0.173   |
| Total |           | 1697776 | 100.000 |

t = 48 h

Sample Name : t=48\_SOD-1042  
Sample ID :  
Data Filename : t=48\_SOD-1042.gcd  
Method Filename : Methode\_Achiral\_MUC\_Integration.gcm  
Batch Filename : achiralGC.gcb  
Vial # : 7  
Injection Volume : 5 uL  
Date Acquired : 28.02.2020 14:13:57  
Date Processed : 28.02.2020 14:34:39

uV

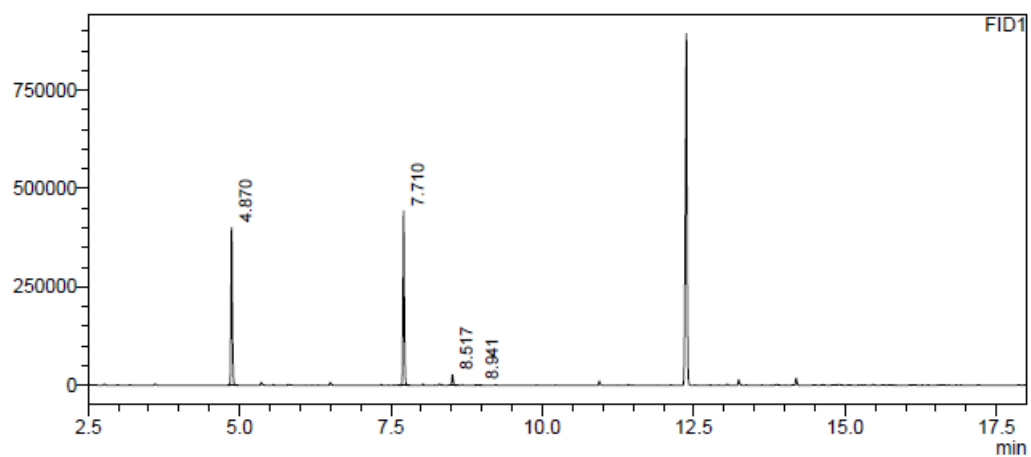

FID1

| Peak# | Ret. Time | Area    | Area%   |
|-------|-----------|---------|---------|
| 1     | 4.870     | 618564  | 46.873  |
| 2     | 7.710     | 659743  | 49.994  |
| 3     | 8.517     | 39217   | 2.972   |
| 4     | 8.941     | 2124    | 0.161   |
| Total |           | 1319647 | 100.000 |

Sample Name : t=48\_SOD-1043  
Sample ID :  
Data Filename : t=48\_SOD-1043.gcd  
Method Filename : Methode\_Achiral\_MUC\_Integration.gcm  
Batch Filename : achiralGC.gcb  
Vial # : 8  
Injection Volume : 5 uL  
Date Acquired : 28.02.2020 14:39:20  
Date Processed : 04.03.2020 11:10:01

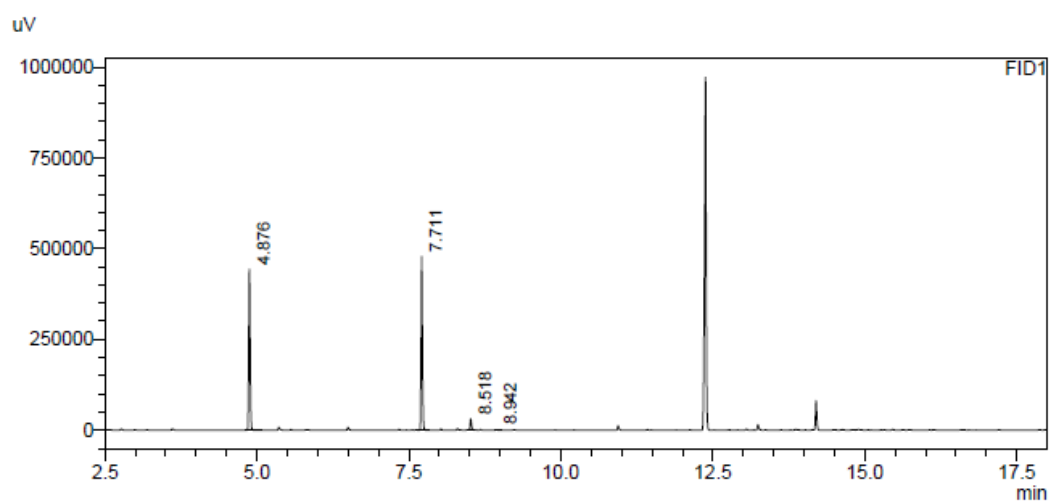

FID1

| Peak# | Ret. Time | Area    | Area%   |
|-------|-----------|---------|---------|
| 1     | 4.876     | 700010  | 47.951  |
| 2     | 7.711     | 712621  | 48.815  |
| 3     | 8.518     | 45145   | 3.092   |
| 4     | 8.942     | 2054    | 0.141   |
| Total |           | 1459830 | 100.000 |

Sample Name : t=48\_SOD-1044  
 Sample ID :  
 Data Filename : t=48\_SOD-1044.gcd  
 Method Filename : Methode\_Achiral\_MUC\_Integration.gcm  
 Batch Filename : achiralGC.gcb  
 Vial # : 9  
 Injection Volume : 5 uL  
 Date Acquired : 28.02.2020 15:04:42  
 Date Processed : 04.03.2020 11:10:52

uV

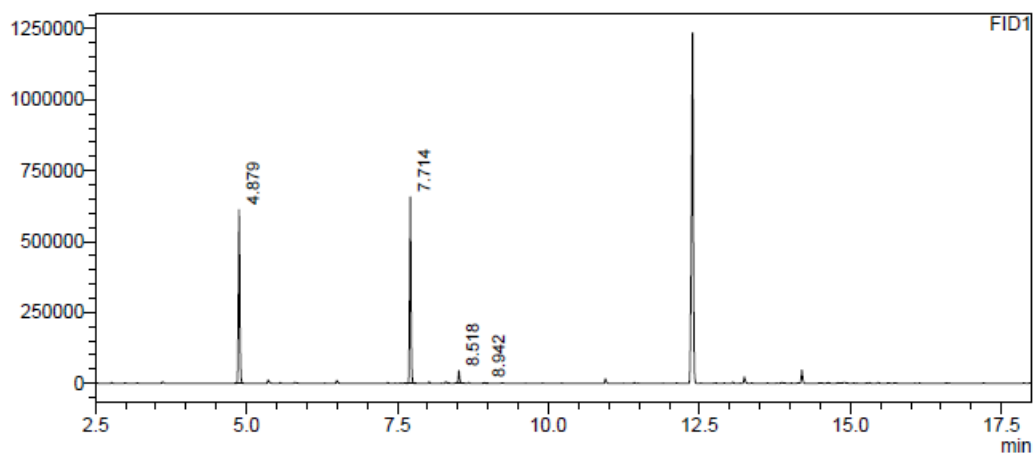

FID1

| Peak# | Ret. Time | Area    | Area%   |
|-------|-----------|---------|---------|
| 1     | 4.879     | 976986  | 47.587  |
| 2     | 7.714     | 1007562 | 49.076  |
| 3     | 8.518     | 65415   | 3.186   |
| 4     | 8.942     | 3085    | 0.150   |
| Total |           | 2053048 | 100.000 |

t = 72 h

Sample Name : t=72\_SOD-1042  
Sample ID :  
Data Filename : t=72\_SOD-1042.gcd  
Method Filename : Methode\_Achiral\_MUC\_Integration.gcm  
Batch Filename : achiralGC.gcb  
Vial # : 1  
Injection Volume : 5 uL  
Date Acquired : 03.03.2020 14:50:23  
Date Processed : 03.03.2020 15:11:06

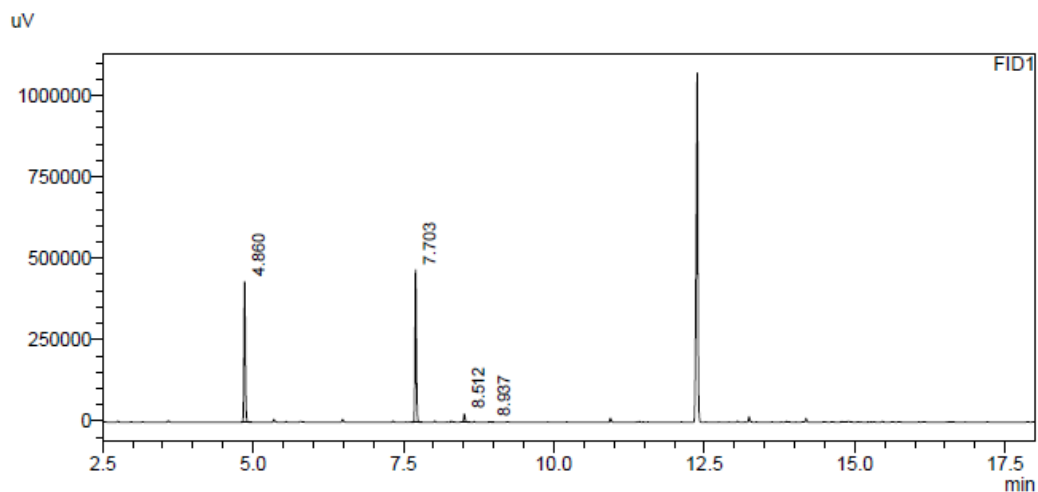

| Peak# | Ret. Time | Area    | Area%   |
|-------|-----------|---------|---------|
| 1     | 4.860     | 679813  | 47.619  |
| 2     | 7.703     | 708667  | 49.640  |
| 3     | 8.512     | 37095   | 2.598   |
| 4     | 8.937     | 2043    | 0.143   |
| Total |           | 1427618 | 100.000 |

Sample Name : t=72\_SOD-1043  
 Sample ID :  
 Data Filename : t=72\_SOD-1043.gcd  
 Method Filename : Methode\_Achiral\_MUC\_Integration.gcm  
 Batch Filename : achiralGC.gcb  
 Vial # : 2  
 Injection Volume : 5 uL  
 Date Acquired : 03.03.2020 15:15:42  
 Date Processed : 03.03.2020 15:36:26

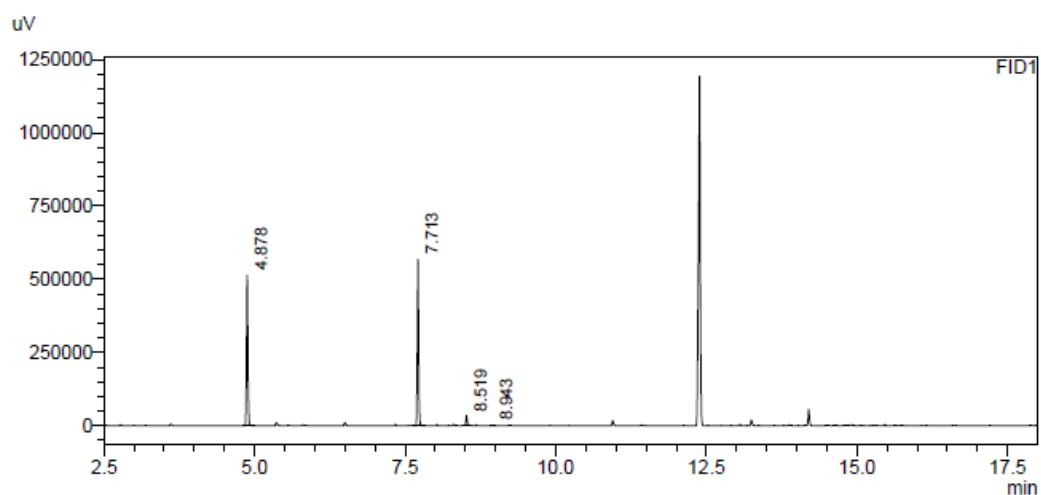

| Peak# | Ret. Time | Area    | Area%   |
|-------|-----------|---------|---------|
| 1     | 4.878     | 825866  | 47.599  |
| 2     | 7.713     | 857466  | 49.421  |
| 3     | 8.519     | 49143   | 2.832   |
| 4     | 8.943     | 2563    | 0.148   |
| Total |           | 1735038 | 100.000 |



Sample Name : t=72\_SOD-1044  
 Sample ID :  
 Data Filename : t=72\_SOD-1044.gcd  
 Method Filename : Methode\_Achiral\_MUC\_Integration.gcm  
 Batch Filename : achiralGC.gcb  
 Vial # : 3  
 Injection Volume : 5 uL  
 Date Acquired : 03.03.2020 15:41:01  
 Date Processed : 03.03.2020 16:01:45

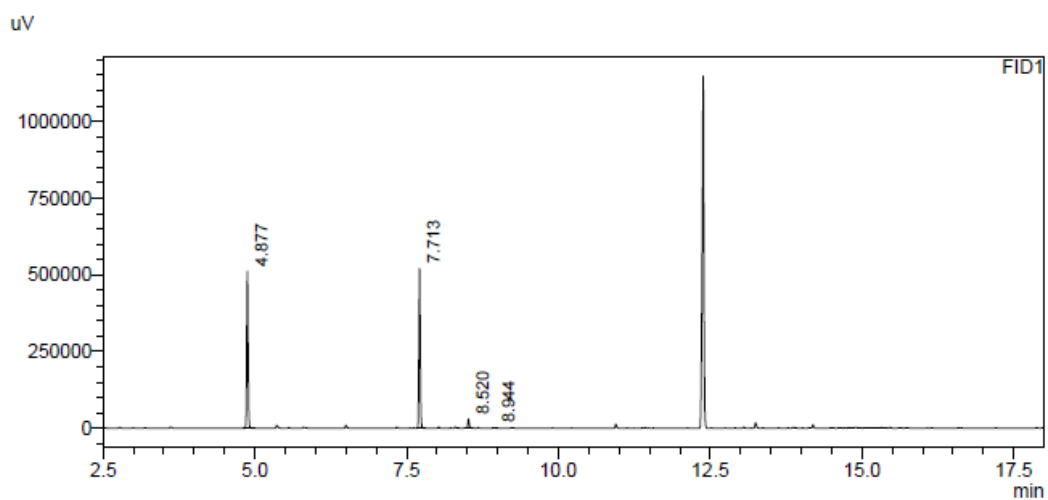

| Peak# | Ret. Time | Area    | Area%   |
|-------|-----------|---------|---------|
| 1     | 4.877     | 793184  | 48.943  |
| 2     | 7.713     | 780063  | 48.133  |
| 3     | 8.520     | 44952   | 2.774   |
| 4     | 8.944     | 2437    | 0.150   |
| Total |           | 1620636 | 100.000 |

## 2. Chiral spectra<sup>1</sup>

### 2.1 Chiral GC spectra of Table S1 (optimization of capsule loading)

#### Entry 1

Sample Name : t72\_SOD\_232  
Sample ID :  
Data Filename : t72\_SOD\_232.gcd  
Method Filename : Methode\_Chiral\_MUC\_2.gcm  
Batch Filename : batch\_chiral.gcb  
Vial # : 11  
Injection Volume : 1  $\mu$ L  
Date Acquired : 17.09.2018 18:44:58  
Date Processed : 17.09.2018 19:28:01

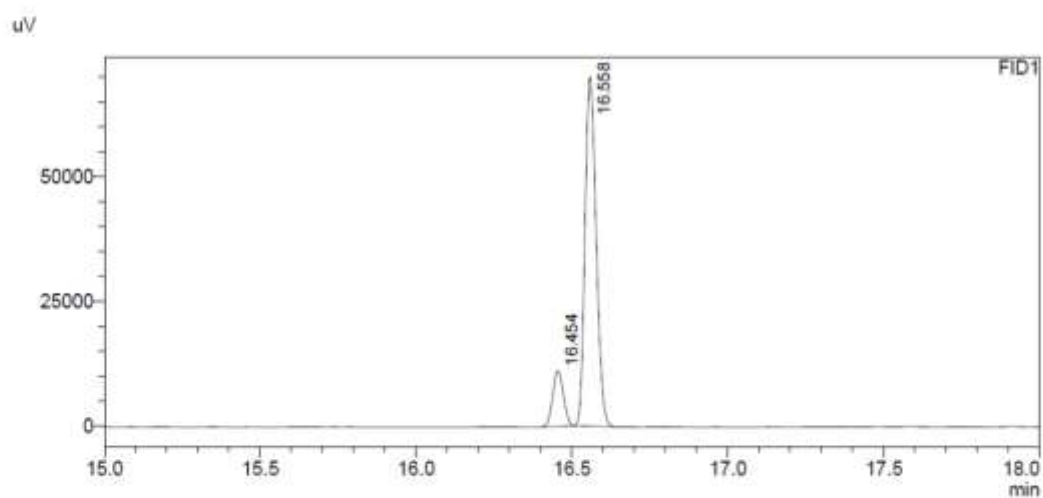

| Peak# | Ret. Time | Area   | Area%   |
|-------|-----------|--------|---------|
| 1     | 16.454    | 26642  | 13.297  |
| 2     | 16.558    | 173722 | 86.703  |
| Total |           | 200365 | 100.000 |

<sup>1</sup> Enantiomeric excesses are given after 72 h of the reaction unless stated differently.  
S386 (GC Spectra)

## Entry 2

Sample Name : t72\_SOD\_233  
Sample ID :  
Data Filename : t72\_SOD\_233.gcd  
Method Filename : Methode\_Chiral\_MUC\_2.gcm  
Batch Filename : batch\_chiral.gcb  
Vial # : 12  
Injection Volume : 1 uL  
Date Acquired : 17.09.2018 19:32:46  
Date Processed : 17.09.2018 20:15:50

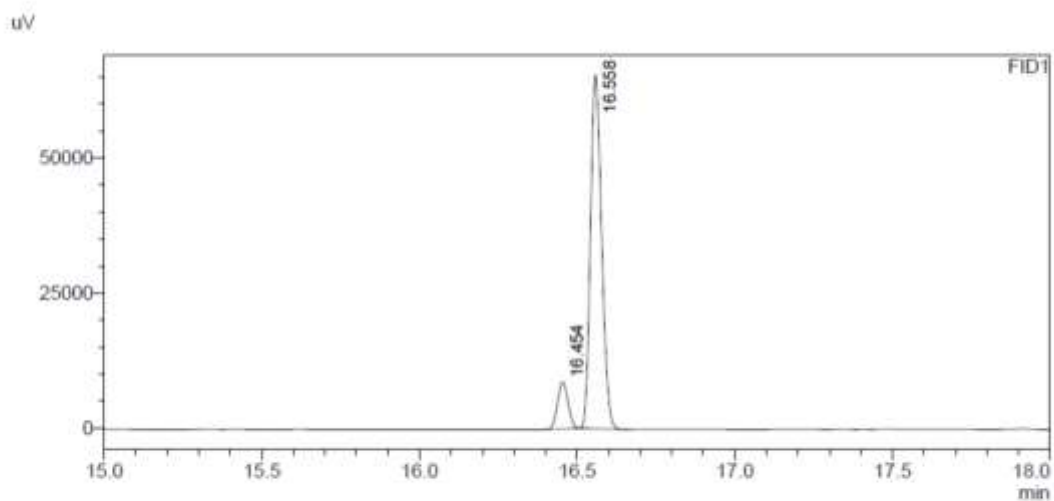

| Peak# | Ret. Time | Area   | Area%   |
|-------|-----------|--------|---------|
| 1     | 16.454    | 20172  | 11.149  |
| 2     | 16.558    | 160767 | 88.851  |
| Total |           | 180939 | 100.000 |

### Entry 3

Sample Name : t72\_SOD\_234  
Sample ID :  
Data Filename : t72\_SOD\_234.gcd  
Method Filename : Methode\_Chiral\_MUC\_2.gcm  
Batch Filename : batch\_chiral.gcb  
Vial # : 13  
Injection Volume : 1 uL  
Date Acquired : 17.09.2018 20:20:34  
Date Processed : 17.09.2018 21:03:36

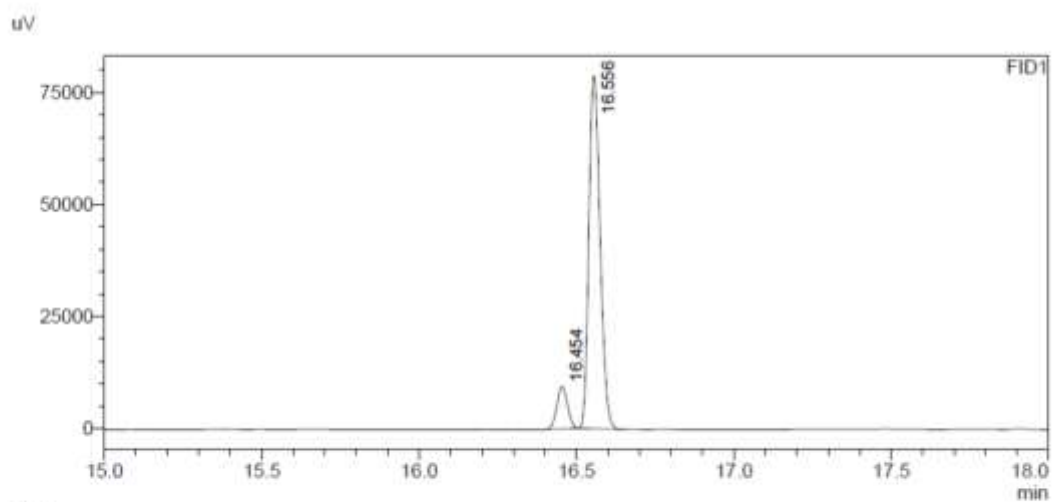

FID1

| Peak# | Ret. Time | Area   | Area%   |
|-------|-----------|--------|---------|
| 1     | 16.454    | 22348  | 10.269  |
| 2     | 16.556    | 195272 | 89.731  |
| Total |           | 217620 | 100.000 |

## Entry 4

Sample Name : t72\_SOD\_235  
Sample ID :  
Data Filename : t72\_SOD\_235.gcd  
Method Filename : Methode\_Chiral\_MUC\_2.gcm  
Batch Filename : batch\_chiral.gcb  
Vial # : 14  
Injection Volume : 1 uL  
Date Acquired : 17.09.2018 21:08:22  
Date Processed : 17.09.2018 21:51:28

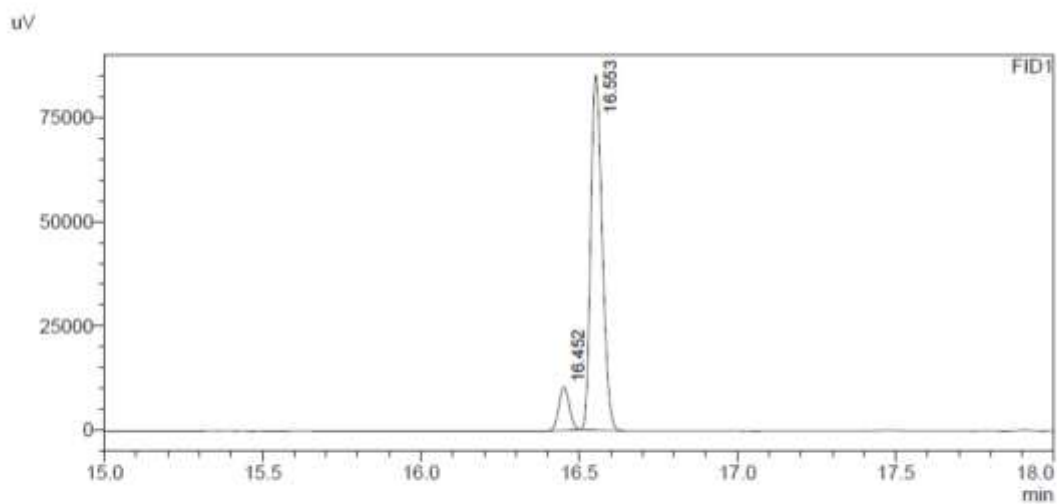

FID1

| Peak# | Ret. Time | Area   | Area%   |
|-------|-----------|--------|---------|
| 1     | 16.452    | 23893  | 10.025  |
| 2     | 16.553    | 214451 | 89.975  |
| Total |           | 238344 | 100.000 |

## Entry 5

Sample Name : t72\_SOD\_236  
Sample ID :  
Data Filename : t72\_SOD\_236.gcd  
Method Filename : Methode\_Chiral\_MUC\_2.gcm  
Batch Filename : batch\_chiral.gcb  
Vial # : 15  
Injection Volume : 1 uL  
Date Acquired : 17.09.2018 21:56:05  
Date Processed : 17.09.2018 22:39:08

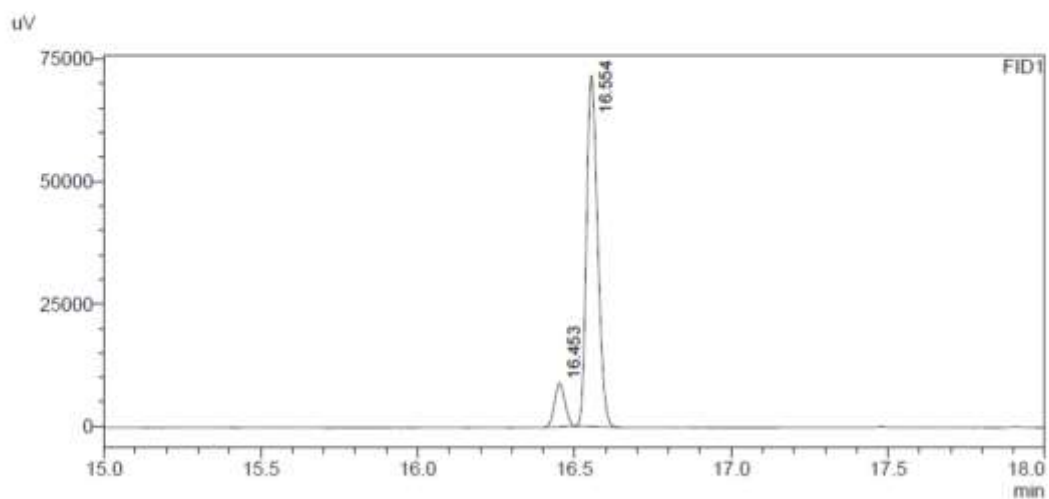

FID1

| Peak# | Ret. Time | Area   | Area%   |
|-------|-----------|--------|---------|
| 1     | 16.453    | 20468  | 10.347  |
| 2     | 16.554    | 177352 | 89.653  |
| Total |           | 197820 | 100.000 |

## Entry 6

Sample Name : t72\_SOD\_237  
Sample ID :  
Data Filename : t72\_SOD\_237.gcd  
Method Filename : Methode\_Chiral\_MUC\_2.gcm  
Batch Filename : batch\_chiral.gcb  
Vial # : 16  
Injection Volume : 1 uL  
Date Acquired : 17.09.2018 22:43:50  
Date Processed : 17.09.2018 23:26:54

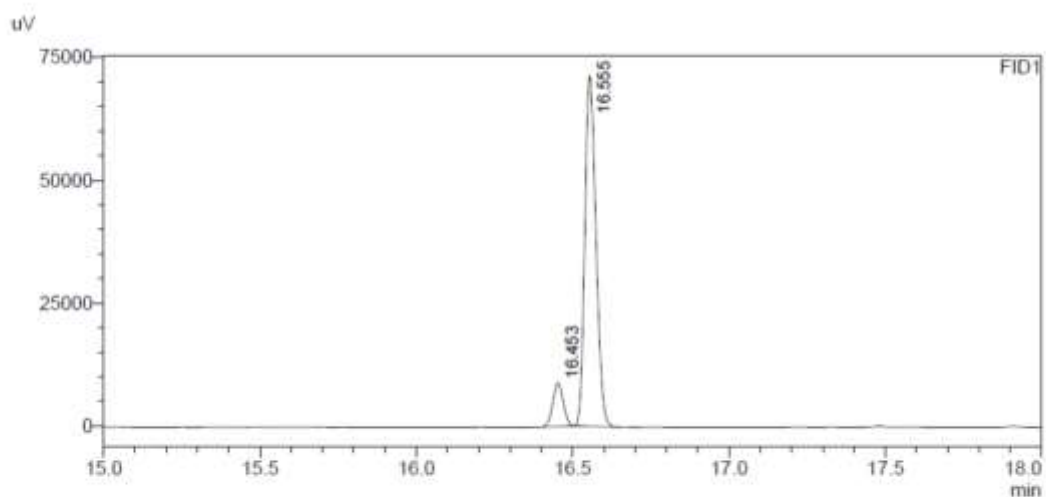

FID1

| Peak# | Ret. Time | Area   | Area%   |
|-------|-----------|--------|---------|
| 1     | 16.453    | 20551  | 10.443  |
| 2     | 16.555    | 176230 | 89.557  |
| Total |           | 196780 | 100.000 |

## Entry 7

Sample Name : t72\_SOD\_238  
Sample ID :  
Data Filename : t72\_SOD\_238.gcd  
Method Filename : Methode\_Chiral\_MUC\_2.gcm  
Batch Filename : batch\_chiral.gcb  
Vial # : 17  
Injection Volume : 1 uL  
Date Acquired : 17.09.2018 23:31:36  
Date Processed : 18.09.2018 00:14:40

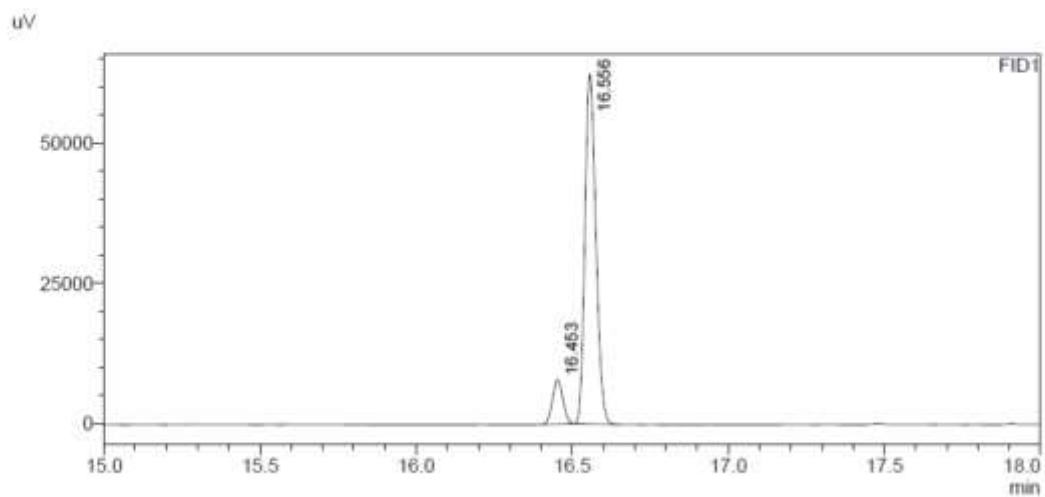

| Peak# | Ret. Time | Area   | Area%   |
|-------|-----------|--------|---------|
| 1     | 16.453    | 18402  | 10.784  |
| 2     | 16.556    | 152240 | 89.216  |
| Total |           | 170642 | 100.000 |



## Entry 8

Sample Name : t72\_SOD\_239  
Sample ID :  
Data Filename : t72\_SOD\_239.gcd  
Method Filename : Methode\_Chiral\_MUC\_2.gcm  
Batch Filename : batch\_chiral.gcb  
Vial # : 18  
Injection Volume : 1 uL  
Date Acquired : 18.09.2018 00:19:20  
Date Processed : 18.09.2018 01:02:24

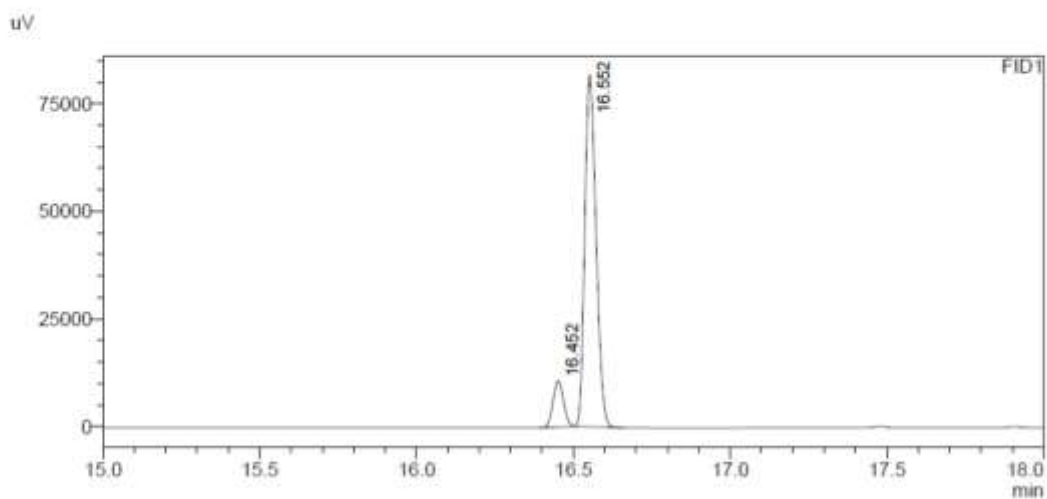

| Peak# | Ret. Time | Area   | Area%   |
|-------|-----------|--------|---------|
| 1     | 16.452    | 25225  | 10.964  |
| 2     | 16.552    | 204845 | 89.036  |
| Total |           | 230070 | 100.000 |

## Entry 9

Sample Name : t72\_SOD\_240  
Sample ID :  
Data Filename : t72\_SOD\_240.gcd  
Method Filename : Methode\_Chiral\_MUC\_2.gcm  
Batch Filename : batch\_chiral.gcb  
Vial # : 19  
Injection Volume : 1 uL  
Date Acquired : 18.09.2018 01:07:04  
Date Processed : 18.09.2018 01:50:07

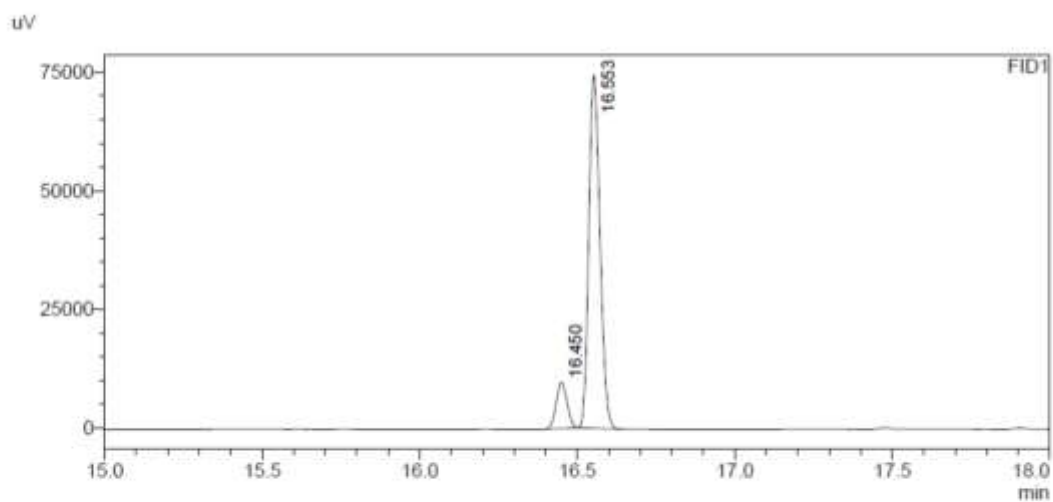

FID1

| Peak# | Ret. Time | Area   | Area%   |
|-------|-----------|--------|---------|
| 1     | 16.450    | 23151  | 11.244  |
| 2     | 16.553    | 182742 | 88.756  |
| Total |           | 205893 | 100.000 |

# Entry 10

Sample Name : t72\_SOD\_241  
Sample ID :  
Data Filename : t72\_SOD\_241.gcd  
Method Filename : Methode\_Chiral\_MUC\_2.gcm  
Batch Filename : batch\_chiral.gcb  
Vial # : 20  
Injection Volume : 1 uL  
Date Acquired : 18.09.2018 01:54:46  
Date Processed : 18.09.2018 02:37:51

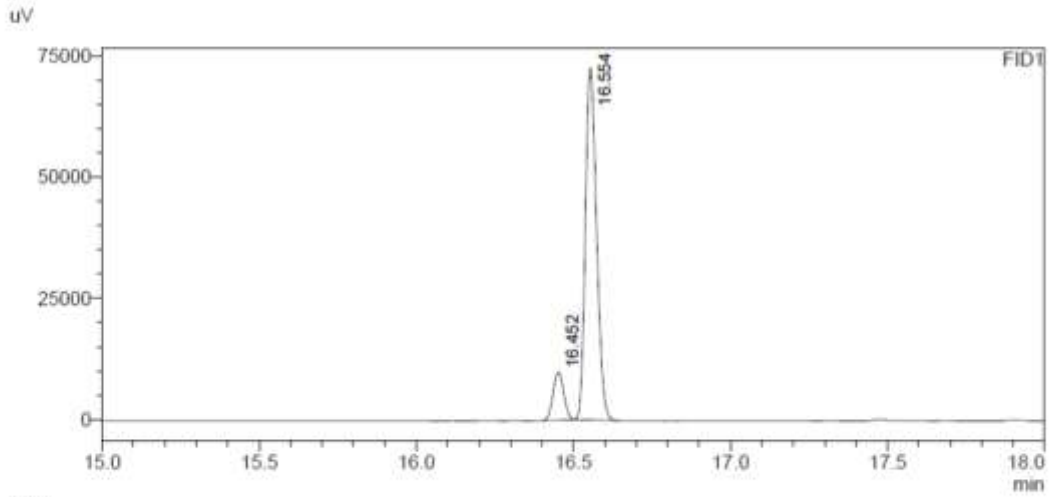

FID1

| Peak# | Ret. Time | Area   | Area%   |
|-------|-----------|--------|---------|
| 1     | 16.452    | 23403  | 11.529  |
| 2     | 16.554    | 179593 | 88.471  |
| Total |           | 202997 | 100.000 |

## 2.2 Chiral GC spectra of Table S2 (optimization of L-proline loading)

### Entry 1

Sample Name : t=72\_SOD\_619  
Sample ID :  
Data Filename : t=72\_SOD\_619.gcd  
Method Filename : Methode\_Chiral\_MUC\_2.gcm  
Batch Filename : batch\_chiral.gcb  
Vial # : 1  
Injection Volume : 1 uL  
Date Acquired : 15.03.2019 17:22:33  
Date Processed : 18.03.2019 11:16:45

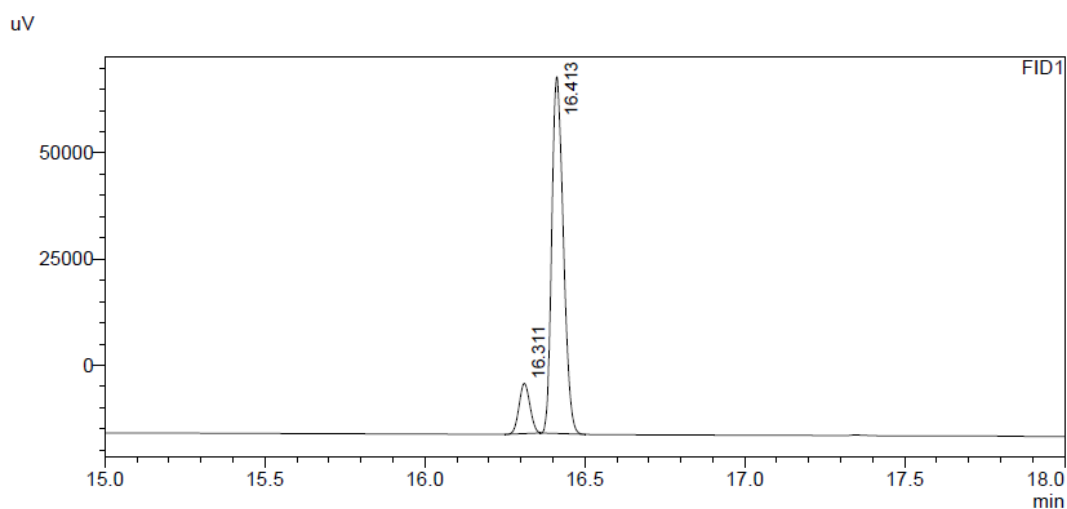

FID1

| Peak# | Ret. Time | Area   | Area%   |
|-------|-----------|--------|---------|
| 1     | 16.311    | 27894  | 11.629  |
| 2     | 16.413    | 211964 | 88.371  |
| Total |           | 239858 | 100.000 |

Sample Name : t=72\_SOD\_680  
Sample ID :  
Data Filename : t=72\_SOD\_680.gcd  
Method Filename : Methode\_Chiral\_MUC\_2.gcm  
Batch Filename : batch\_chiral.gcb  
Vial # : 13  
Injection Volume : 1 uL  
Date Acquired : 06.04.2019 21:54:38  
Date Processed : 06.04.2019 22:37:43

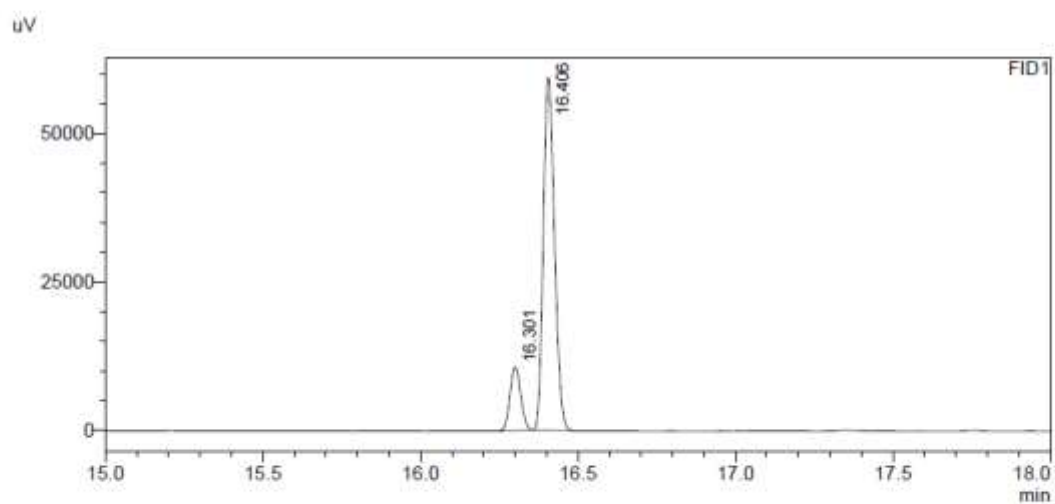

FID1

| Peak# | Ret. Time | Area   | Area%   |
|-------|-----------|--------|---------|
| 1     | 16.301    | 25648  | 14.882  |
| 2     | 16.406    | 146693 | 85.118  |
| Total |           | 172341 | 100.000 |

Sample Name : t=72\_SOD\_681  
Sample ID :  
Data Filename : t=72\_SOD\_681.gcd  
Method Filename : Methode\_Chiral\_MUC\_2.gcm  
Batch Filename : batch\_chiral.gcb  
Vial # : 14  
Injection Volume : 1 uL  
Date Acquired : 06.04.2019 22:42:30  
Date Processed : 06.04.2019 23:25:32

uV

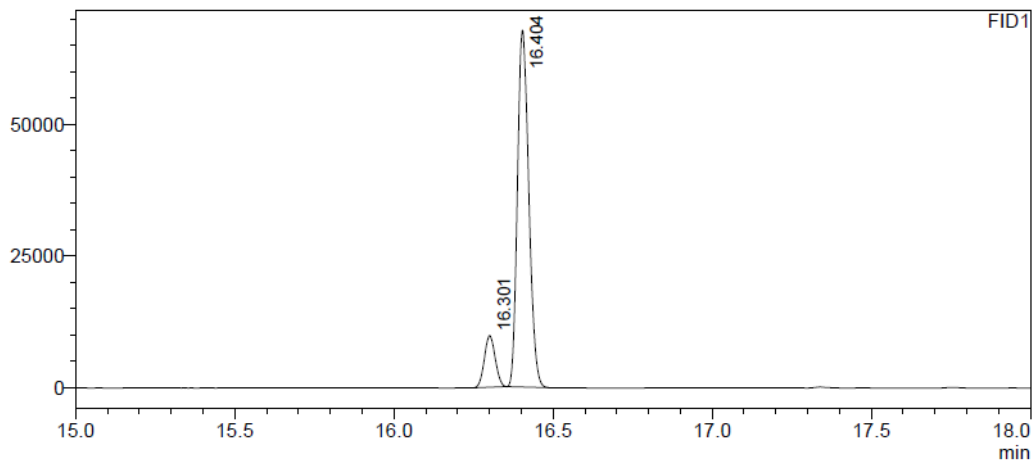

FID1

| Peak# | Ret. Time | Area   | Area%   |
|-------|-----------|--------|---------|
| 1     | 16.301    | 23243  | 12.124  |
| 2     | 16.404    | 168468 | 87.876  |
| Total |           | 191711 | 100.000 |

## Entry 2

Sample Name : t=72\_SOD\_668  
Sample ID :  
Data Filename : t=72\_SOD\_668.gcd  
Method Filename : Methode\_Chiral\_MUC\_2.gcm  
Batch Filename : batch\_chiral.gcb  
Vial # : 1  
Injection Volume : 1 uL  
Date Acquired : 06.04.2019 12:21:01  
Date Processed : 06.04.2019 13:04:05

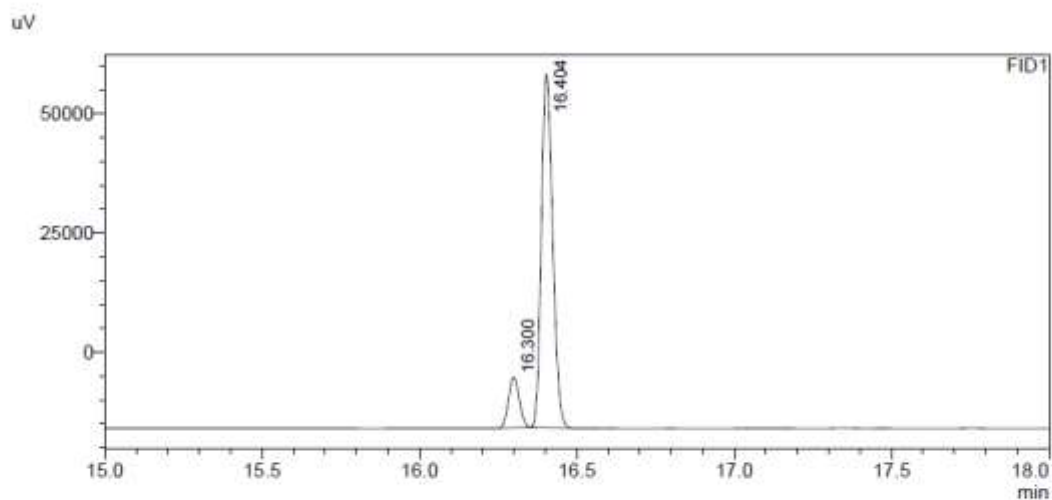

FID1

| Peak# | Ret. Time | Area   | Area%   |
|-------|-----------|--------|---------|
| 1     | 16.300    | 25013  | 11.902  |
| 2     | 16.404    | 185149 | 88.098  |
| Total |           | 210162 | 100.000 |

Sample Name : t=72\_SOD\_682  
Sample ID :  
Data Filename : t=72\_SOD\_682.gcd  
Method Filename : Methode\_Chiral\_MUC\_2.gcm  
Batch Filename : batch\_chiral.gcb  
Vial # : 15  
Injection Volume : 1 uL  
Date Acquired : 06.04.2019 23:30:15  
Date Processed : 07.04.2019 00:13:19

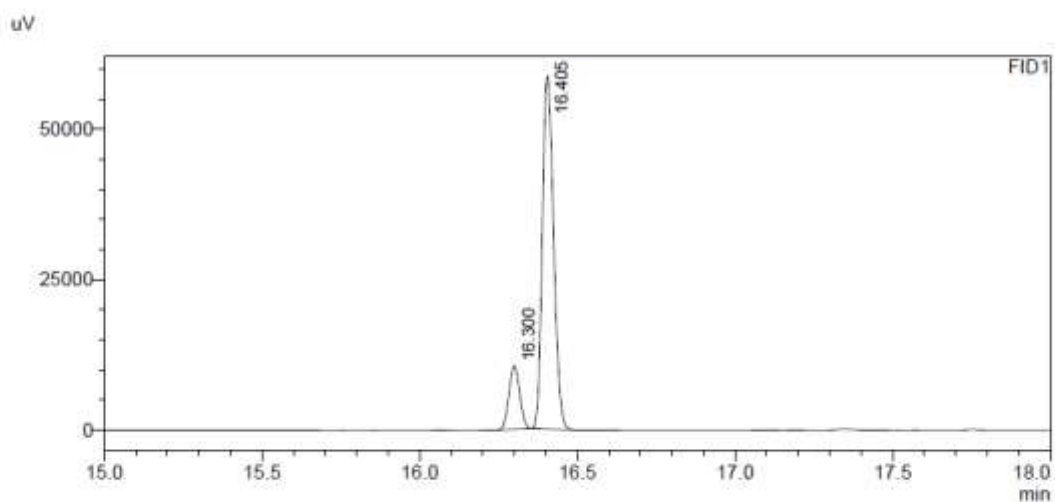

| Peak# | Ret. Time | Area   | Area%   |
|-------|-----------|--------|---------|
| 1     | 16.300    | 25069  | 14.690  |
| 2     | 16.405    | 145589 | 85.310  |
| Total |           | 170658 | 100.000 |



Sample Name : t=72\_SOD\_683  
Sample ID :  
Data Filename : t=72\_SOD\_683.gcd  
Method Filename : Methode\_Chiral\_MUC\_2.gcm  
Batch Filename : batch\_chiral.gcb  
Vial # : 16  
Injection Volume : 1 uL  
Date Acquired : 07.04.2019 00:17:59  
Date Processed : 07.04.2019 01:01:01

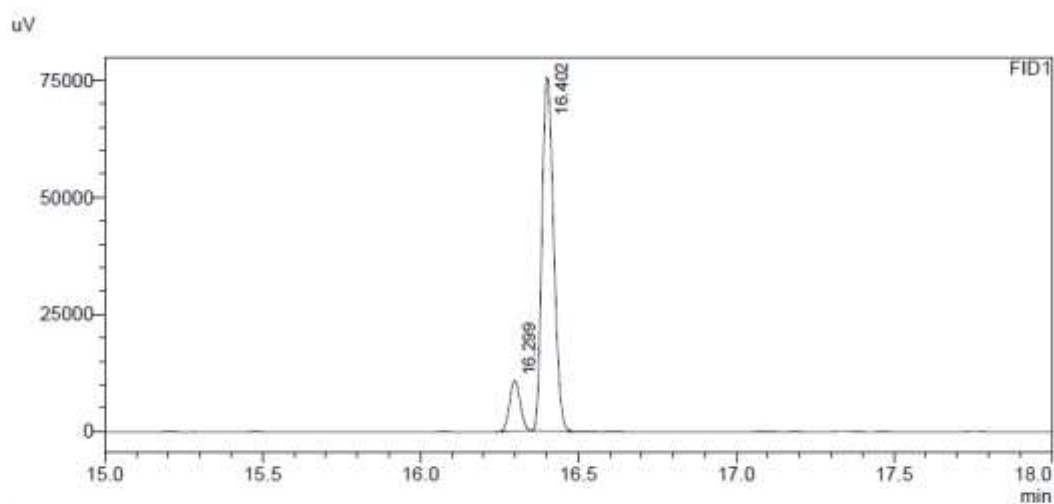

FID1

| Peak# | Ret. Time | Area   | Area%   |
|-------|-----------|--------|---------|
| 1     | 16.299    | 25623  | 11.616  |
| 2     | 16.402    | 194958 | 88.384  |
| Total |           | 220582 | 100.000 |

### Entry 3

Sample Name : t=72\_SOD\_684  
Sample ID :  
Data Filename : t=72\_SOD\_684.gcd  
Method Filename : Methode\_Chiral\_MUC\_2.gcm  
Batch Filename : batch\_chiral.gcb  
Vial # : 17  
Injection Volume : 1 uL  
Date Acquired : 07.04.2019 01:05:42  
Date Processed : 07.04.2019 01:48:46

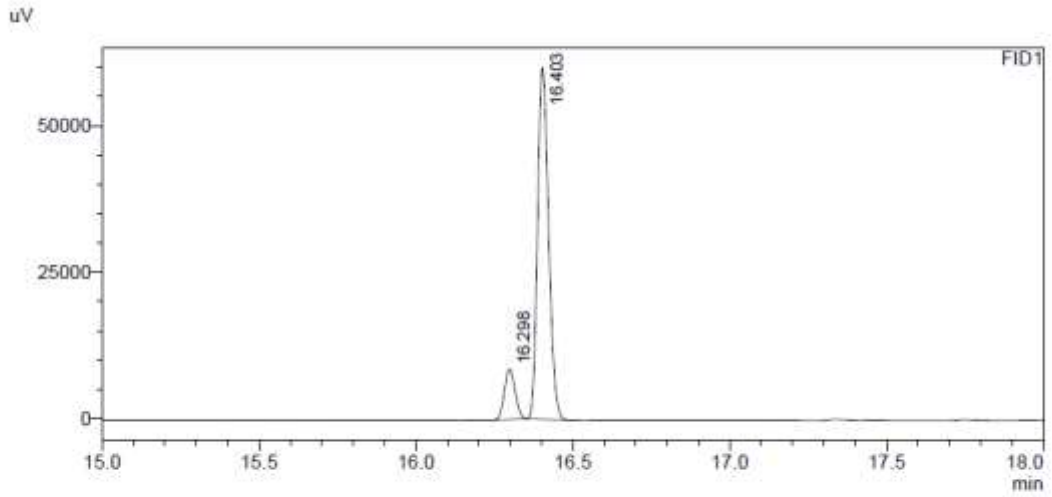

FID1

| Peak# | Ret. Time | Area   | Area%   |
|-------|-----------|--------|---------|
| 1     | 16.298    | 20298  | 12.153  |
| 2     | 16.403    | 146718 | 87.847  |
| Total |           | 167016 | 100.000 |

Sample Name : t=72\_SOD\_685  
Sample ID :  
Data Filename : t=72\_SOD\_685.gcd  
Method Filename : Methode\_Chiral\_MUC\_2.gcm  
Batch Filename : batch\_chiral.gcb  
Vial # : 18  
Injection Volume : 1 uL  
Date Acquired : 07.04.2019 01:53:29  
Date Processed : 07.04.2019 02:36:33

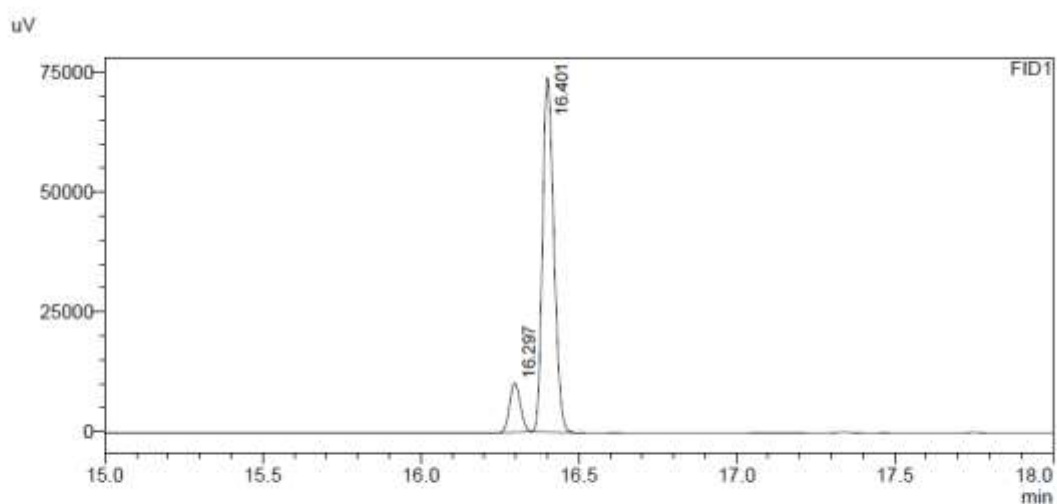

FID1

| Peak# | Ret. Time | Area   | Area%   |
|-------|-----------|--------|---------|
| 1     | 16.297    | 24299  | 11.645  |
| 2     | 16.401    | 184372 | 88.355  |
| Total |           | 208671 | 100.000 |

### 2.3 Chiral GC spectra of Table S3 (optimization of HCl content)

12mol% I

Entry 1

Sample Name : t72\_SOD\_175  
Sample ID :  
Data Filename : t72\_SOD\_175.gcd  
Method Filename : Methode\_Chiral\_MUC\_2.gcm  
Batch Filename : batch\_chiral.gcb  
Vial # : 66  
Injection Volume : 1 uL  
Date Acquired : 22.08.2018 14:04:03  
Date Processed : 22.08.2018 14:47:07

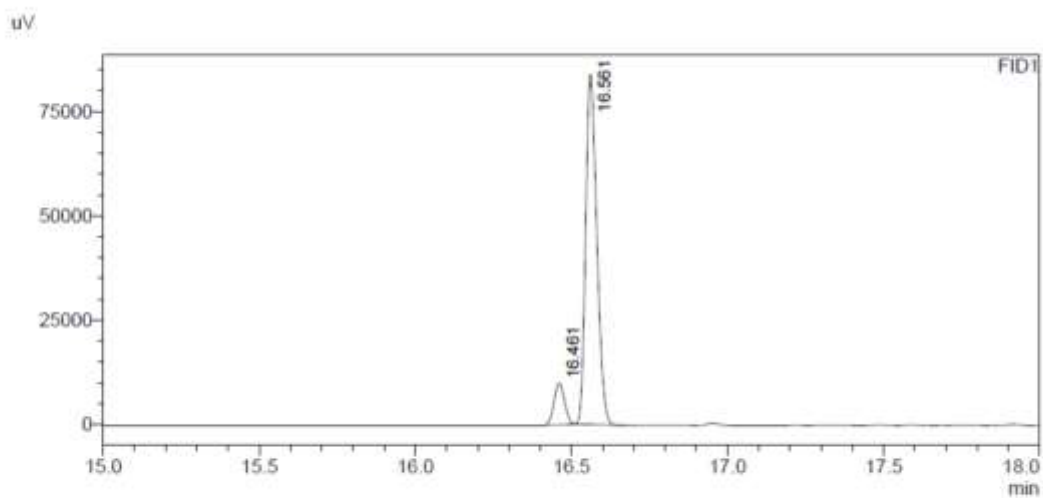

| Peak# | Ret. Time | Area   | Area%   |
|-------|-----------|--------|---------|
| 1     | 16.461    | 23392  | 10.098  |
| 2     | 16.561    | 208267 | 89.902  |
| Total |           | 231659 | 100.000 |

## Entry 2

Sample Name : t72\_SOD\_176  
Sample ID :  
Data Filename : t72\_SOD\_176.gcd  
Method Filename : Methode\_Chiral\_MUC\_2.gcm  
Batch Filename : batch\_chiral.gcb  
Vial # : 67  
Injection Volume : 1 uL  
Date Acquired : 22.08.2018 14:51:50  
Date Processed : 22.08.2018 15:34:54

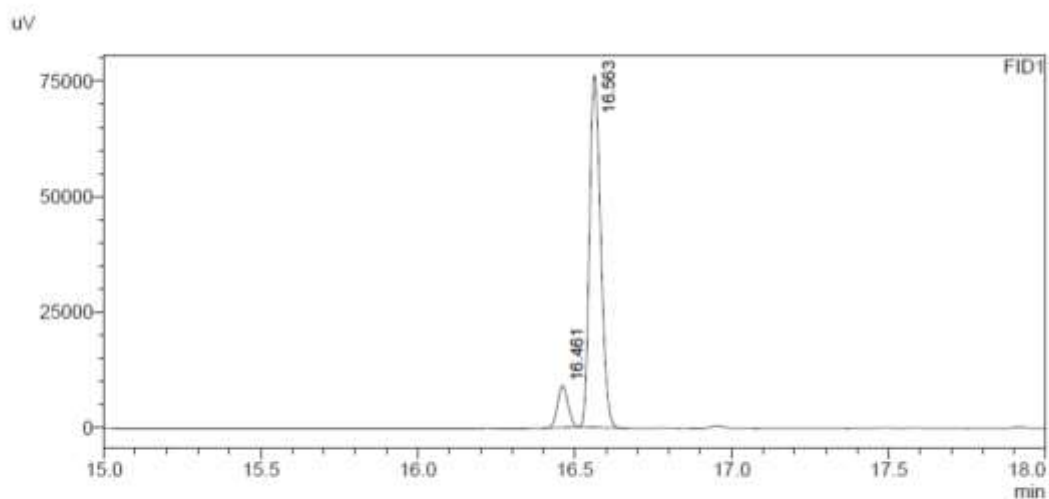

| Peak# | Ret. Time | Area   | Area%   |
|-------|-----------|--------|---------|
| 1     | 16.461    | 21075  | 10.051  |
| 2     | 16.563    | 188601 | 89.949  |
| Total |           | 209676 | 100.000 |

### Entry 3

Sample Name : t72\_SOD\_177  
Sample ID :  
Data Filename : t72\_SOD\_177.gcd  
Method Filename : Methode\_Chiral\_MUC\_2.gcm  
Batch Filename : batch\_chiral.gcb  
Vial # : 68  
Injection Volume : 1 uL  
Date Acquired : 22.08.2018 15:39:39  
Date Processed : 22.08.2018 16:22:42

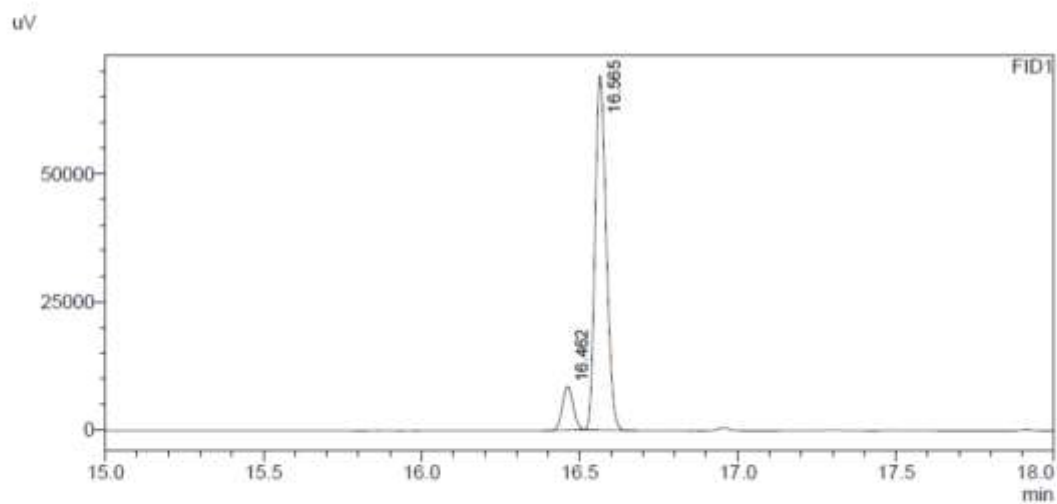

FID1

| Peak# | Ret. Time | Area   | Area%   |
|-------|-----------|--------|---------|
| 1     | 16.462    | 20057  | 10.526  |
| 2     | 16.565    | 170498 | 89.474  |
| Total |           | 190555 | 100.000 |

## Entry 4

Sample Name : t72\_SOD\_178  
Sample ID :  
Data Filename : t72\_SOD\_178.gcd  
Method Filename : Methode\_Chiral\_MUC\_2.gcm  
Batch Filename : batch\_chiral.gcb  
Vial # : 69  
Injection Volume : 1 uL  
Date Acquired : 22.08.2018 16:27:32  
Date Processed : 23.08.2018 10:29:54

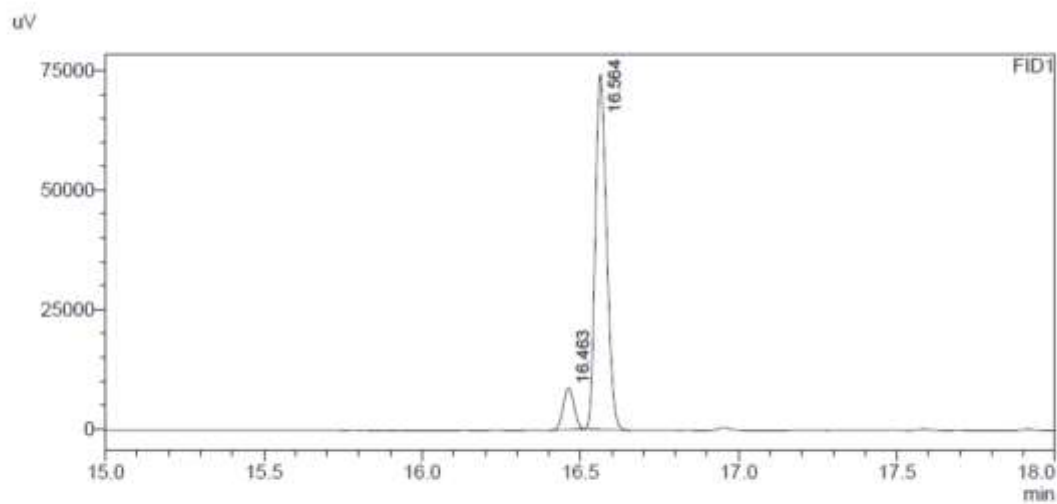

FID1

| Peak# | Ret. Time | Area   | Area%   |
|-------|-----------|--------|---------|
| 1     | 16.463    | 20920  | 10.158  |
| 2     | 16.564    | 185036 | 89.842  |
| Total |           | 205956 | 100.000 |

## Entry 5

Sample Name : t72\_SOD\_179  
Sample ID :  
Data Filename : t72\_SOD\_179.gcd  
Method Filename : Methode\_Chiral\_MUC\_2.gcm  
Batch Filename : batch\_chiral.gcb  
Vial # : 70  
Injection Volume : 1 uL  
Date Acquired : 22.08.2018 17:15:21  
Date Processed : 23.08.2018 10:30:24

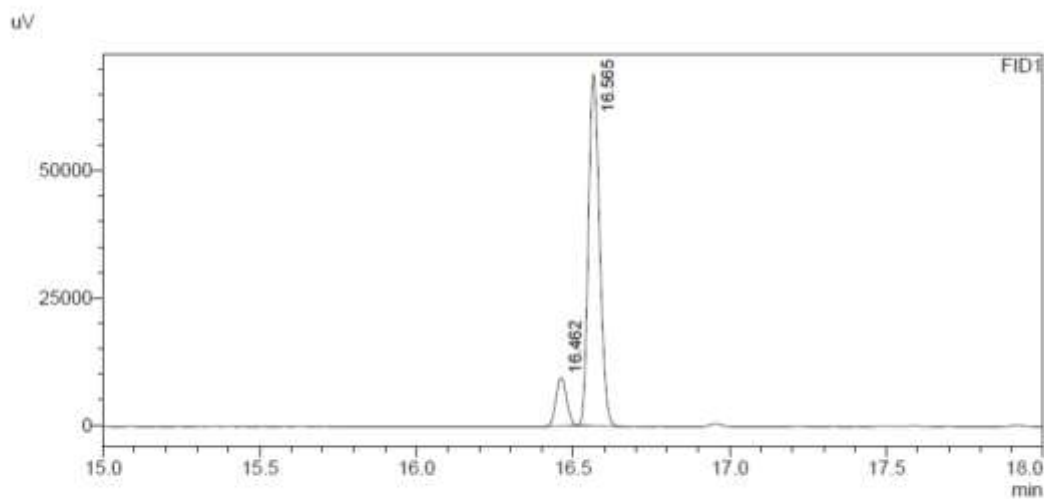

| Peak# | Ret. Time | Area   | Area%   |
|-------|-----------|--------|---------|
| 1     | 16.462    | 22593  | 11.659  |
| 2     | 16.565    | 171187 | 88.341  |
| Total |           | 193780 | 100.000 |



26mol% I

Entry 1

Sample Name : t72\_SOD\_180  
Sample ID :  
Data Filename : t72\_SOD\_180.gcd  
Method Filename : Methode\_Chiral\_MUC\_2.gcm  
Batch Filename : batch\_chiral.gcb  
Vial # : 71  
Injection Volume : 1 uL  
Date Acquired : 22.08.2018 18:03:12  
Date Processed : 23.08.2018 10:31:10

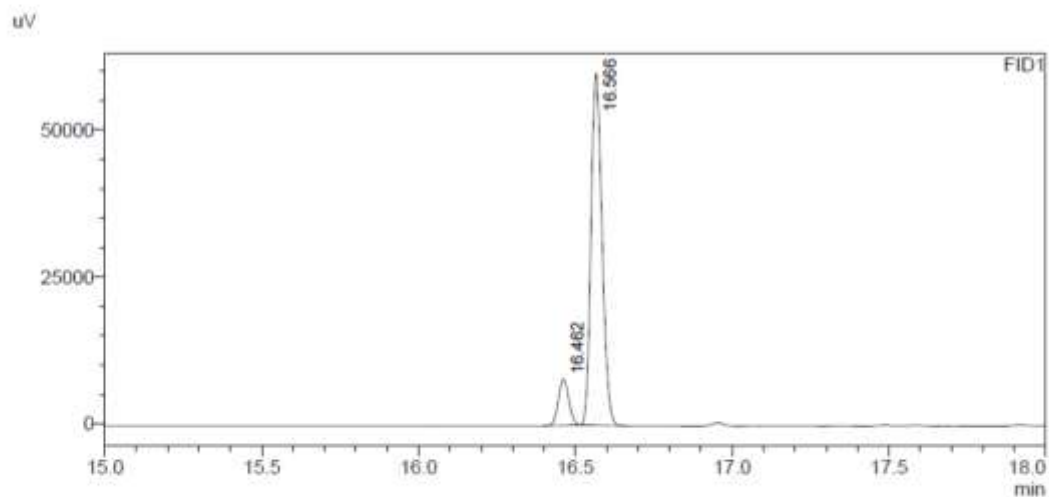

| Peak# | Ret. Time | Area   | Area%   |
|-------|-----------|--------|---------|
| 1     | 16.462    | 18212  | 11.091  |
| 2     | 16.566    | 145986 | 88.909  |
| Total |           | 164198 | 100.000 |

## Entry 2

Sample Name : t72\_SOD\_181  
Sample ID :  
Data Filename : t72\_SOD\_181.gcd  
Method Filename : Methode\_Chiral\_MUC\_2.gcm  
Batch Filename : batch\_chiral.gcb  
Vial # : 72  
Injection Volume : 1 uL  
Date Acquired : 22.08.2018 18:50:58  
Date Processed : 23.08.2018 10:31:29

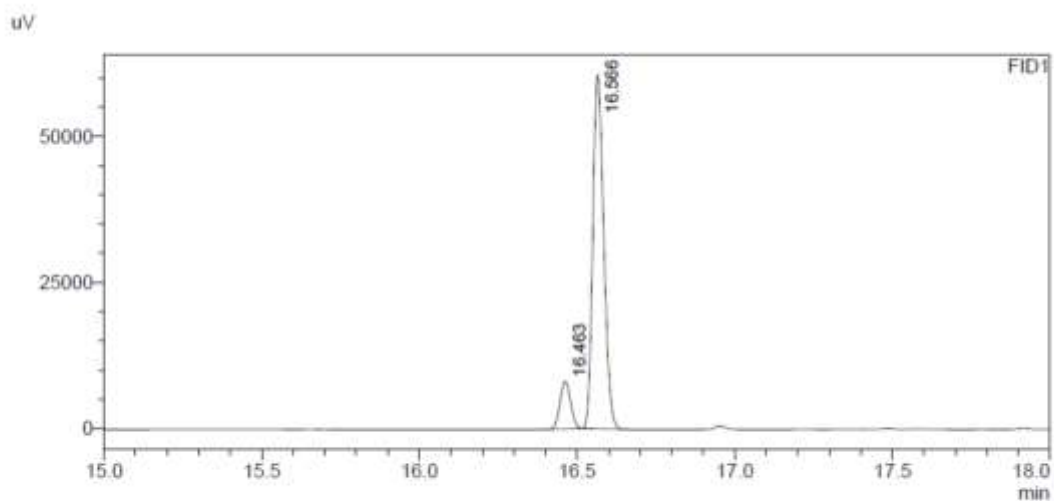

| Peak# | Ret. Time | Area   | Area%   |
|-------|-----------|--------|---------|
| 1     | 16.463    | 19100  | 11.586  |
| 2     | 16.566    | 145752 | 88.414  |
| Total |           | 164851 | 100.000 |

### Entry 3

Sample Name : t72\_SOD\_182  
Sample ID :  
Data Filename : t72\_SOD\_182.gcd  
Method Filename : Methode\_Chiral\_MUC\_2.gcm  
Batch Filename : batch\_chiral.gcb  
Vial # : 73  
Injection Volume : 1 uL  
Date Acquired : 22.08.2018 19:38:48  
Date Processed : 23.08.2018 10:31:48

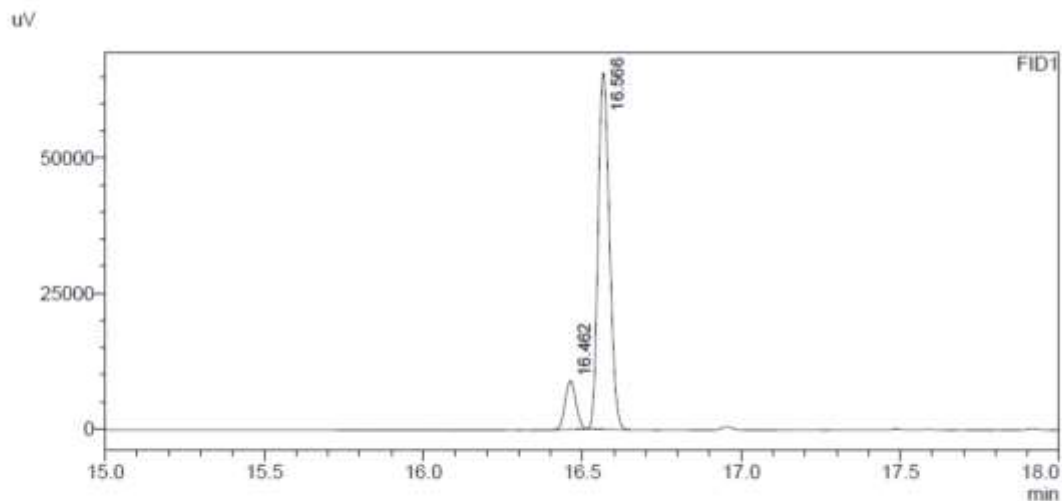

| Peak# | Ret. Time | Area   | Area%   |
|-------|-----------|--------|---------|
| 1     | 16.462    | 21190  | 11.535  |
| 2     | 16.566    | 162507 | 88.465  |
| Total |           | 183697 | 100.000 |

## Entry 4

Sample Name : t72\_SOD\_183  
Sample ID :  
Data Filename : t72\_SOD\_183.gcd  
Method Filename : Methode\_Chiral\_MUC\_2.gcm  
Batch Filename : batch\_chiral.gcb  
Vial # : 74  
Injection Volume : 1 uL  
Date Acquired : 22.08.2018 20:26:36  
Date Processed : 23.08.2018 10:32:05

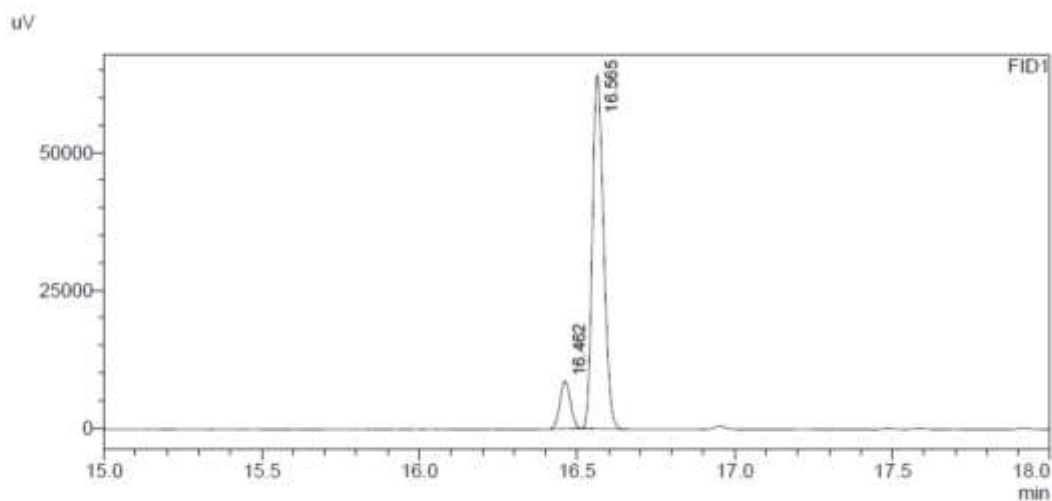

| Peak# | Ret. Time | Area   | Area%   |
|-------|-----------|--------|---------|
| 1     | 16.462    | 19933  | 11.164  |
| 2     | 16.565    | 158616 | 88.836  |
| Total |           | 178549 | 100.000 |

## Entry 5

Sample Name : t72\_SOD\_184  
Sample ID :  
Data Filename : t72\_SOD\_184.gcd  
Method Filename : Methode\_Chiral\_MUC\_2.gcm  
Batch Filename : batch\_chiral.gcb  
Vial # : 75  
Injection Volume : 1 uL  
Date Acquired : 22.08.2018 21:14:23  
Date Processed : 23.08.2018 10:32:23

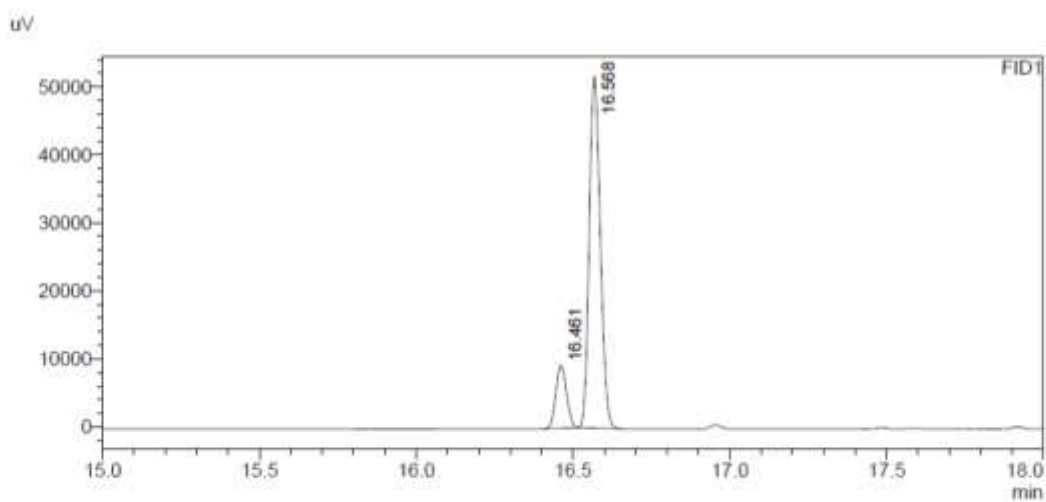

FID1

| Peak# | Ret. Time | Area   | Area%   |
|-------|-----------|--------|---------|
| 1     | 16.461    | 22022  | 14.807  |
| 2     | 16.568    | 126701 | 85.193  |
| Total |           | 148723 | 100.000 |

No capsule I

Entry 1

Sample Name : t72\_SOD\_185  
Sample ID :  
Data Filename : t72\_SOD\_185.gcd  
Method Filename : Methode\_Chiral\_MUC\_2.gcm  
Batch Filename : batch\_chiral.gcb  
Vial # : 76  
Injection Volume : 1 uL  
Date Acquired : 22.08.2018 22:02:10  
Date Processed : 23.08.2018 10:32:47

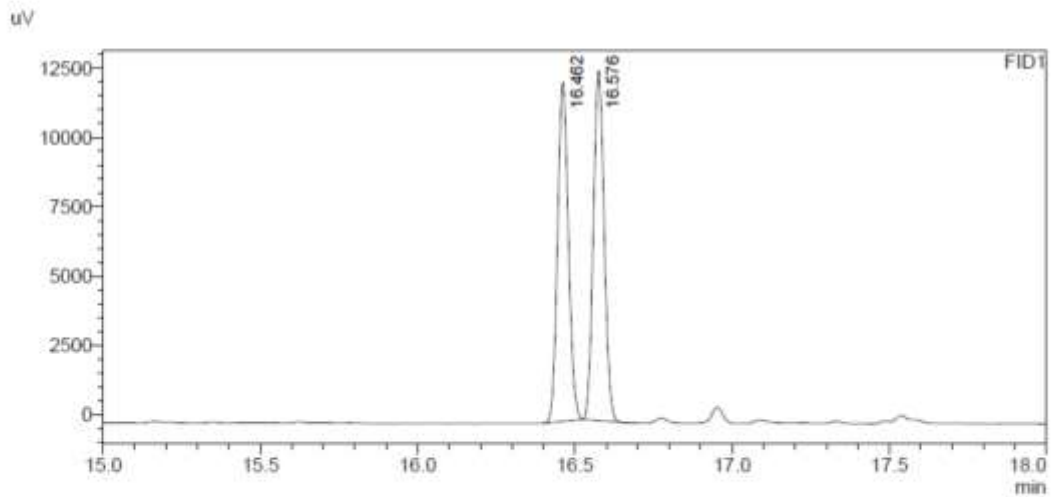

| Peak# | Ret. Time | Area  | Area%   |
|-------|-----------|-------|---------|
| 1     | 16.462    | 29350 | 49.247  |
| 2     | 16.576    | 30248 | 50.753  |
| Total |           | 59598 | 100.000 |

## Entry 2

Sample Name : t72\_SOD\_186  
Sample ID :  
Data Filename : t72\_SOD\_186.gcd  
Method Filename : Methode\_Chiral\_MUC\_2.gcm  
Batch Filename : batch\_chiral.gcb  
Vial # : 77  
Injection Volume : 1 uL  
Date Acquired : 22.08.2018 22:49:58  
Date Processed : 23.08.2018 10:33:05

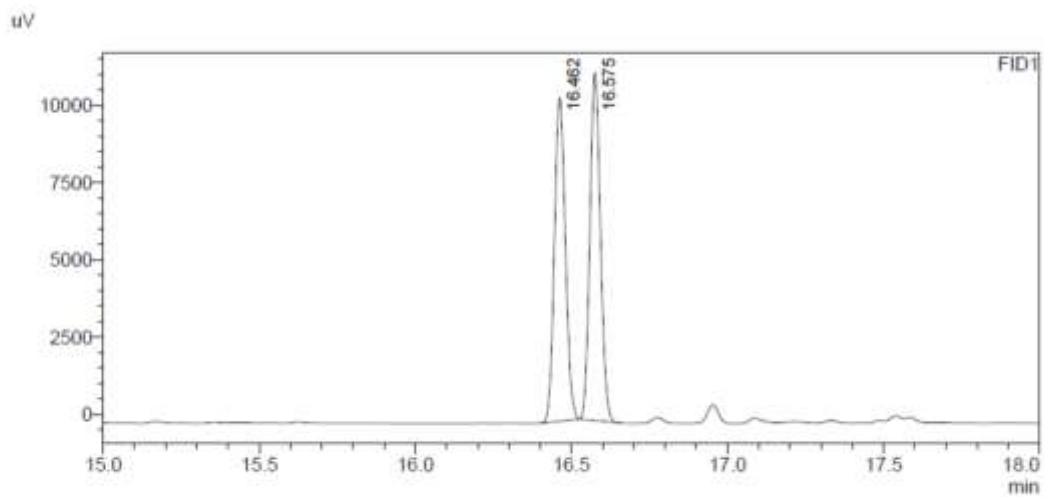

| Peak# | Ret. Time | Area  | Area%   |
|-------|-----------|-------|---------|
| 1     | 16.462    | 25525 | 49.172  |
| 2     | 16.575    | 26385 | 50.828  |
| Total |           | 51910 | 100.000 |

### Entry 3

Sample Name : t72\_SOD\_187  
Sample ID :  
Data Filename : t72\_SOD\_187.gcd  
Method Filename : Methode\_Chiral\_MUC\_2.gcm  
Batch Filename : batch\_chiral.gcb  
Vial # : 78  
Injection Volume : 1 uL  
Date Acquired : 22.08.2018 23:37:49  
Date Processed : 23.08.2018 10:33:33

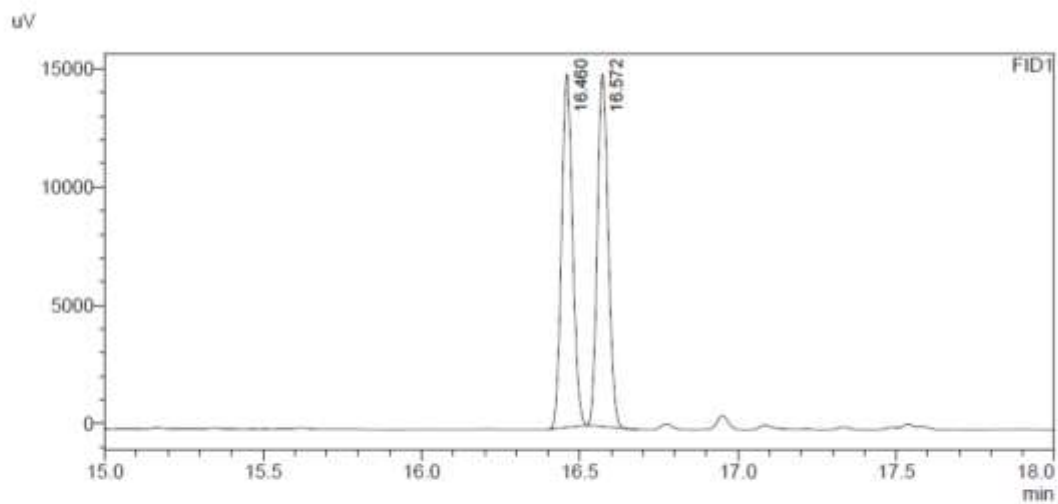

FID1

| Peak# | Ret. Time | Area  | Area%   |
|-------|-----------|-------|---------|
| 1     | 16.460    | 36165 | 50.399  |
| 2     | 16.572    | 35592 | 49.601  |
| Total |           | 71758 | 100.000 |



## Entry 4

Sample Name : t72\_SOD\_188  
Sample ID :  
Data Filename : t72\_SOD\_188.gcd  
Method Filename : Methode\_Chiral\_MUC\_2.gcm  
Batch Filename : batch\_chiral.gcb  
Vial # : 79  
Injection Volume : 1 uL  
Date Acquired : 23.08.2018 00:25:42  
Date Processed : 23.08.2018 10:33:51

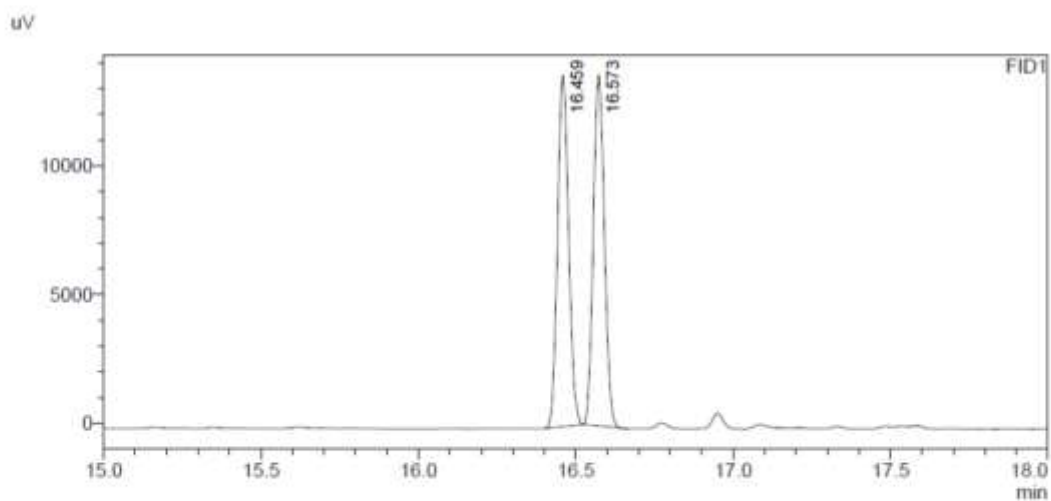

FID1

| Peak# | Ret. Time | Area  | Area%   |
|-------|-----------|-------|---------|
| 1     | 16.459    | 33425 | 50.091  |
| 2     | 16.573    | 33304 | 49.909  |
| Total |           | 66729 | 100.000 |

## Entry 5

Sample Name : t72\_SOD\_189  
Sample ID :  
Data Filename : t72\_SOD\_189.gcd  
Method Filename : Methode\_Chiral\_MUC\_2.gcm  
Batch Filename : batch\_chiral.gcb  
Vial # : 80  
Injection Volume : 1 uL  
Date Acquired : 23.08.2018 01:13:34  
Date Processed : 23.08.2018 10:34:09

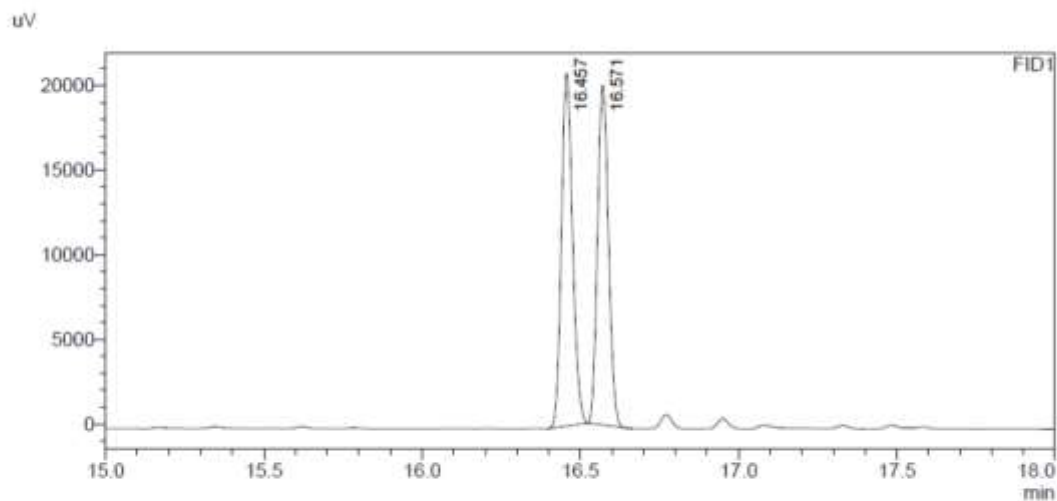

| Peak# | Ret. Time | Area  | Area%   |
|-------|-----------|-------|---------|
| 1     | 16.457    | 51102 | 51.346  |
| 2     | 16.571    | 48423 | 48.654  |
| Total |           | 99525 | 100.000 |

No proline (in presence of 26mol% I)

Entry 1

Sample Name : t72\_SOD\_190  
Sample ID :  
Data Filename : t72\_SOD\_190.gcd  
Method Filename : Methode\_Chiral\_MUC\_2.gcm  
Batch Filename : batch\_chiral.gcb  
Vial # : 81  
Injection Volume : 1 uL  
Date Acquired : 23.08.2018 02:01:21  
Date Processed : 23.08.2018 10:34:25

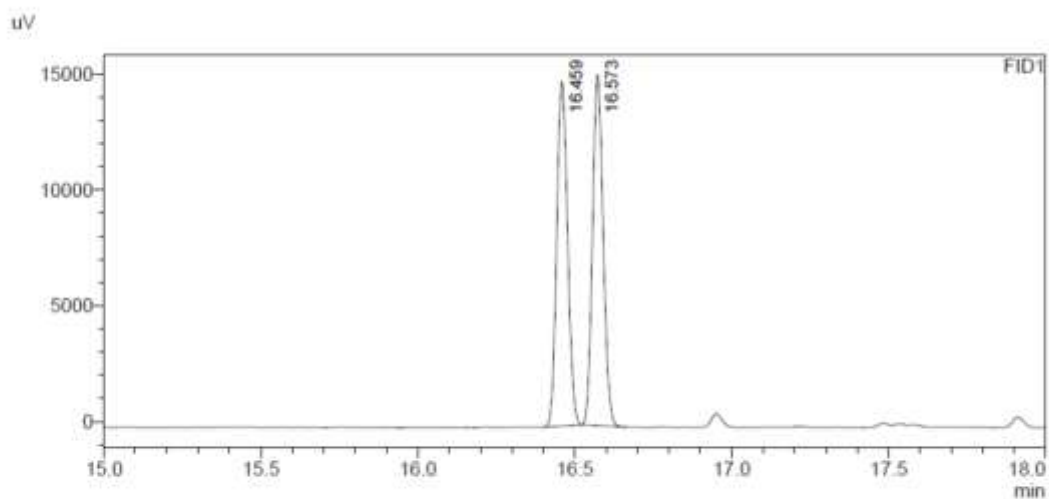

| Peak# | Ret. Time | Area  | Area%   |
|-------|-----------|-------|---------|
| 1     | 16.459    | 35725 | 49.973  |
| 2     | 16.573    | 35764 | 50.027  |
| Total |           | 71489 | 100.000 |

## Entry 2

Sample Name : t72\_SOD\_191  
Sample ID :  
Data Filename : t72\_SOD\_191.gcd  
Method Filename : Methode\_Chiral\_MUC\_2.gcm  
Batch Filename : batch\_chiral.gcb  
Vial # : 82  
Injection Volume : 1 uL  
Date Acquired : 23.08.2018 02:49:11  
Date Processed : 23.08.2018 10:34:41

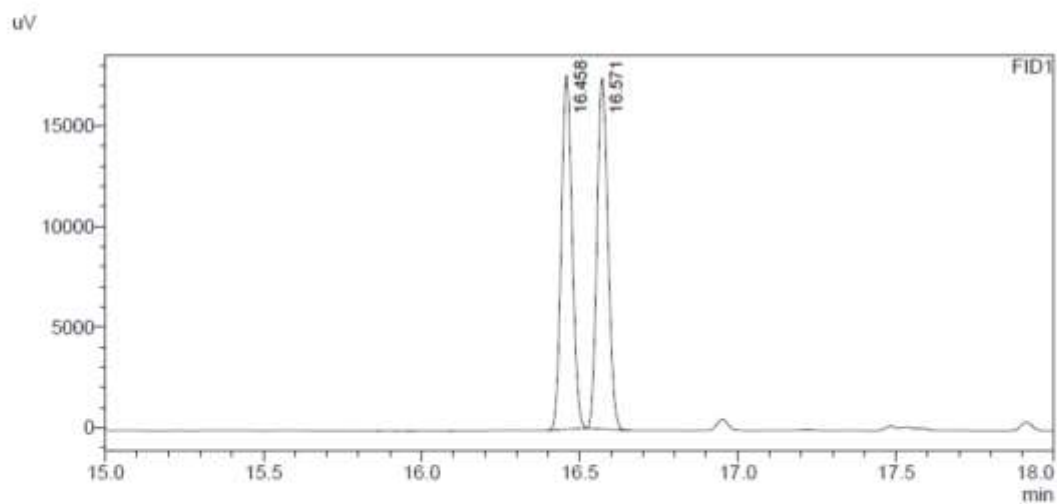

| Peak# | Ret. Time | Area  | Area%   |
|-------|-----------|-------|---------|
| 1     | 16.458    | 42102 | 49.968  |
| 2     | 16.571    | 42156 | 50.032  |
| Total |           | 84258 | 100.000 |

### Entry 3

Sample Name : t72\_SOD\_192  
Sample ID :  
Data Filename : t72\_SOD\_192.gcd  
Method Filename : Methode\_Chiral\_MUC\_2.gcm  
Batch Filename : batch\_chiral.gcb  
Vial # : 83  
Injection Volume : 1 uL  
Date Acquired : 23.08.2018 03:37:00  
Date Processed : 23.08.2018 10:34:57

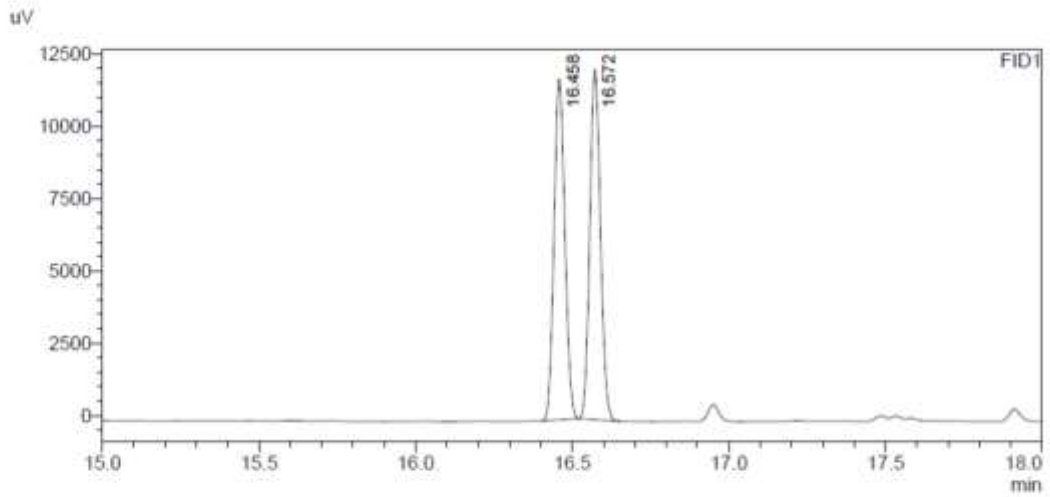

FID1

| Peak# | Ret. Time | Area  | Area%   |
|-------|-----------|-------|---------|
| 1     | 16.458    | 28406 | 49.883  |
| 2     | 16.572    | 28539 | 50.117  |
| Total |           | 56945 | 100.000 |

## Entry 4

Sample Name : t72\_SOD\_193  
Sample ID :  
Data Filename : t72\_SOD\_193.gcd  
Method Filename : Methode\_Chiral\_MUC\_2.gcm  
Batch Filename : batch\_chiral.gcb  
Vial # : 84  
Injection Volume : 1 uL  
Date Acquired : 23.08.2018 04:24:46  
Date Processed : 23.08.2018 10:35:16

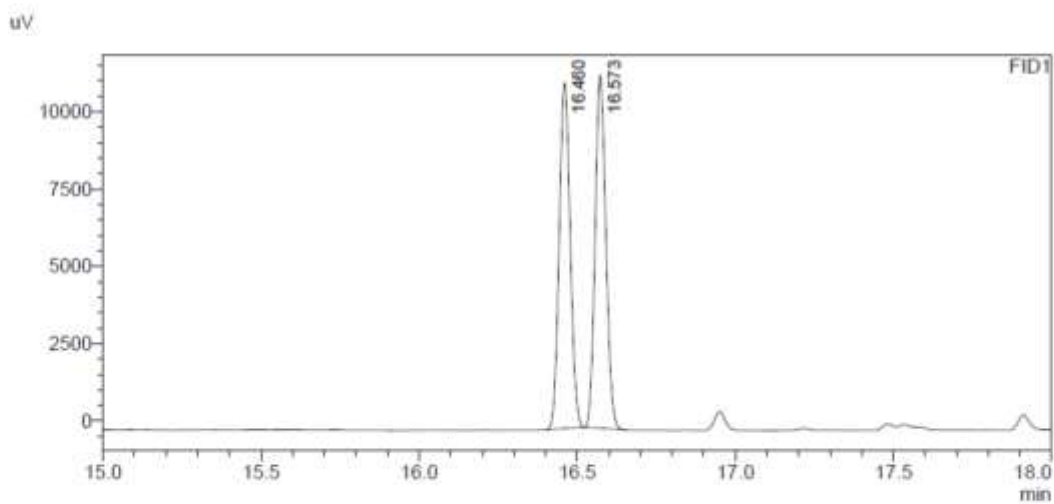

| Peak# | Ret. Time | Area  | Area%   |
|-------|-----------|-------|---------|
| 1     | 16.460    | 26959 | 49.982  |
| 2     | 16.573    | 26979 | 50.018  |
| Total |           | 53937 | 100.000 |

Entry 5

Sample Name : t72\_SOD\_194  
Sample ID :  
Data Filename : t72\_SOD\_194.gcd  
Method Filename : Methode\_Chiral\_MUC\_2.gcm  
Batch Filename : batch\_chiral.gcb  
Vial # : 85  
Injection Volume : 1 uL  
Date Acquired : 23.08.2018 05:12:34  
Date Processed : 23.08.2018 10:35:31

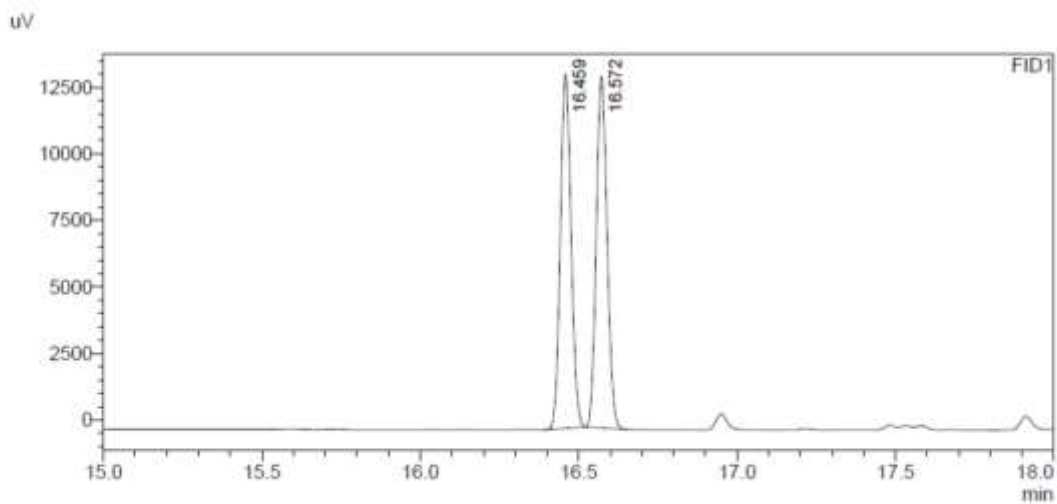

FID1

| Peak# | Ret. Time | Area  | Area%   |
|-------|-----------|-------|---------|
| 1     | 16.459    | 31397 | 49.993  |
| 2     | 16.572    | 31405 | 50.007  |
| Total |           | 62801 | 100.000 |

## 2.4 Chiral GC spectra of Table S4 (optimization of alcohol additive loading)

### Entry 1

No alcohol additive

Sample Name : t=72\_SOD\_340  
Sample ID :  
Data Filename : t=72\_SOD\_341.gcd  
Method Filename : Methode\_Chiral\_MUC\_2.gcm  
Batch Filename : batch\_chiral.gcb  
Vial # : 3  
Injection Volume : 1 uL  
Date Acquired : 23.11.2018 19:18:25  
Date Processed : 26.11.2018 18:11:50

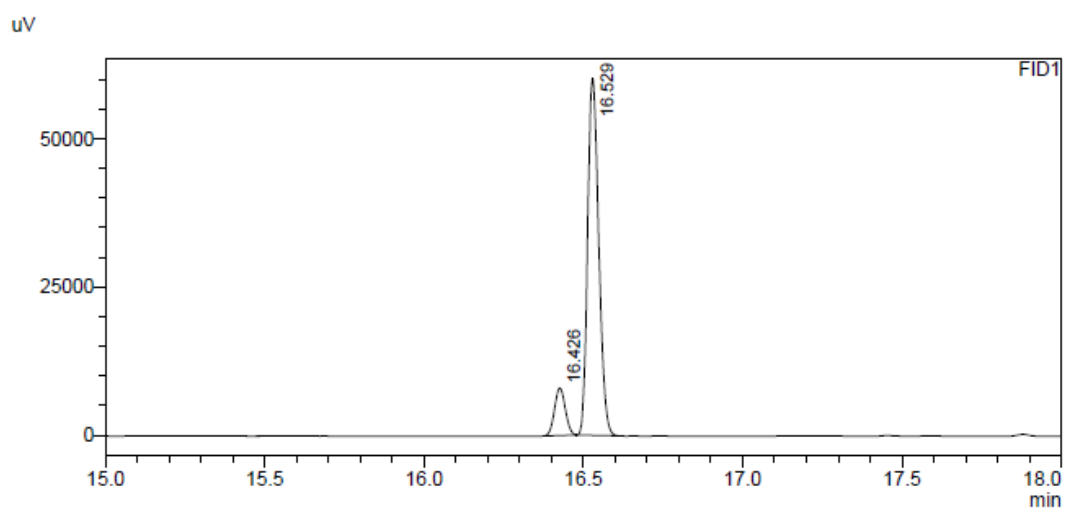

| Peak# | Ret. Time | Area   | Area%   |
|-------|-----------|--------|---------|
| 1     | 16.426    | 18849  | 11.444  |
| 2     | 16.529    | 145860 | 88.556  |
| Total |           | 164708 | 100.000 |



## Entry 2

No alcohol additive

Sample Name : t=72\_SOD\_489  
Sample ID :  
Data Filename : t=72\_SOD\_489.gcd  
Method Filename : Methode\_Chiral\_MUC\_2.gcm  
Batch Filename : batch\_chiral.gcb  
Vial # : 92  
Injection Volume : 1 uL  
Date Acquired : 26.01.2019 17:03:03  
Date Processed : 26.01.2019 17:46:06

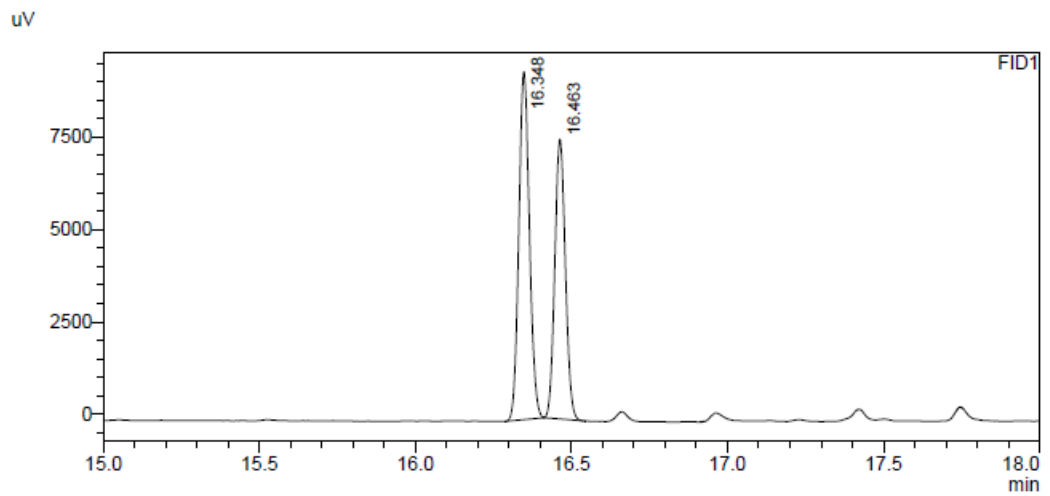

| Peak# | Ret. Time | Area  | Area%   |
|-------|-----------|-------|---------|
| 1     | 16.348    | 22194 | 55.486  |
| 2     | 16.463    | 17806 | 44.514  |
| Total |           | 40000 | 100.000 |

### Entry 3

3eq MeOH

Sample Name : t=72\_SOD\_477  
Sample ID :  
Data Filename : t=72\_SOD\_477.gcd  
Method Filename : Methode\_Chiral\_MUC\_2.gcm  
Batch Filename : batch\_chiral.gcb  
Vial # : 80  
Injection Volume : 1 uL  
Date Acquired : 26.01.2019 07:29:17  
Date Processed : 26.01.2019 08:12:20

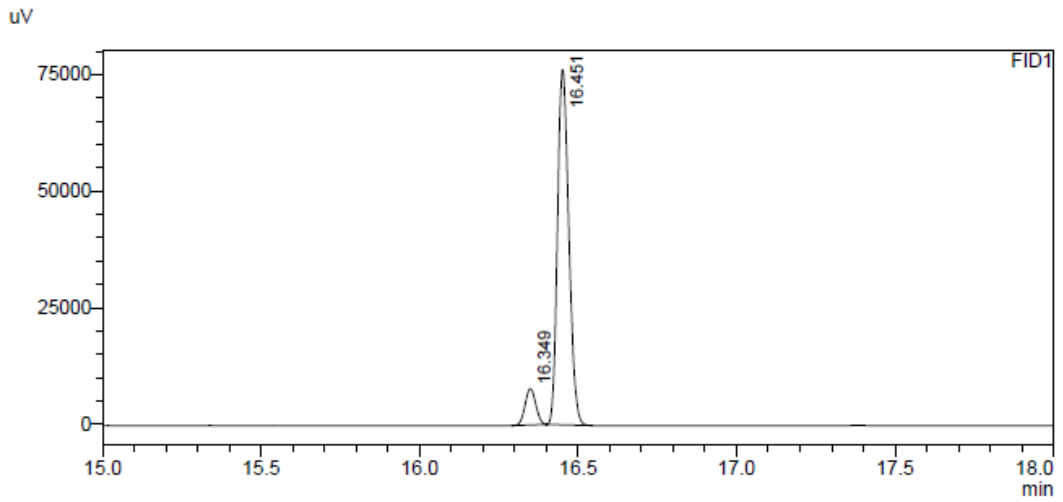

FID1

| Peak# | Ret. Time | Area   | Area%   |
|-------|-----------|--------|---------|
| 1     | 16.349    | 18302  | 8.833   |
| 2     | 16.451    | 188914 | 91.167  |
| Total |           | 207217 | 100.000 |

### 3eq EtOH

Sample Name : t=72\_SOD\_480  
Sample ID :  
Data Filename : t=72\_SOD\_480.gcd  
Method Filename : Methode\_Chiral\_MUC\_2.gcm  
Batch Filename : batch\_chiral.gcb  
Vial # : 83  
Injection Volume : 1 uL  
Date Acquired : 26.01.2019 09:52:47  
Date Processed : 26.01.2019 10:35:50

uV

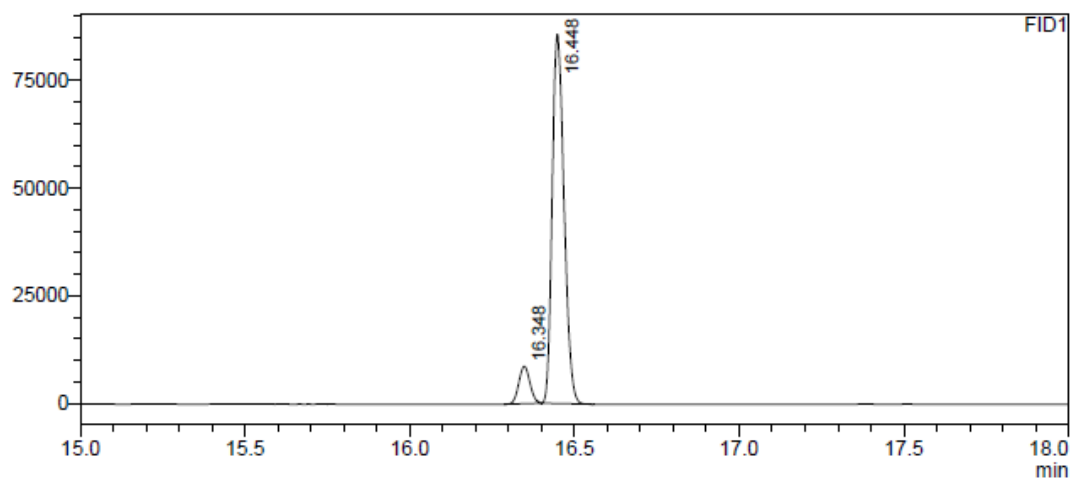

FID1

| Peak# | Ret. Time | Area   | Area%   |
|-------|-----------|--------|---------|
| 1     | 16.348    | 20320  | 8.635   |
| 2     | 16.448    | 214995 | 91.365  |
| Total |           | 235315 | 100.000 |

### 3eq *i*PrOH

Sample Name : t=72\_SOD\_483  
Sample ID :  
Data Filename : t=72\_SOD\_483.gcd  
Method Filename : Methode\_Chiral\_MUC\_2.gcm  
Batch Filename : batch\_chiral.gcb  
Vial # : 86  
Injection Volume : 1 uL  
Date Acquired : 26.01.2019 12:16:11  
Date Processed : 26.01.2019 12:59:14

uV

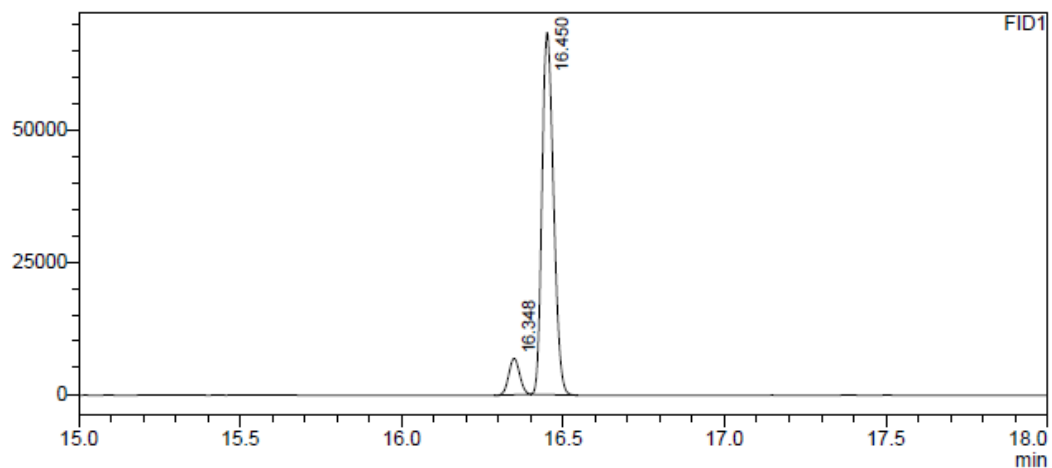

FID1

| Peak# | Ret. Time | Area   | Area%   |
|-------|-----------|--------|---------|
| 1     | 16.348    | 16095  | 8.634   |
| 2     | 16.450    | 170333 | 91.366  |
| Total |           | 186429 | 100.000 |

# Entry 4

3eq MeOH

Sample Name : t=72\_SOD\_490  
Sample ID :  
Data Filename : t=72\_SOD\_490.gcd  
Method Filename : Methode\_Chiral\_MUC\_2.gcm  
Batch Filename : batch\_chiral.gcb  
Vial # : 93  
Injection Volume : 1 uL  
Date Acquired : 26.01.2019 17:50:53  
Date Processed : 26.01.2019 18:33:57

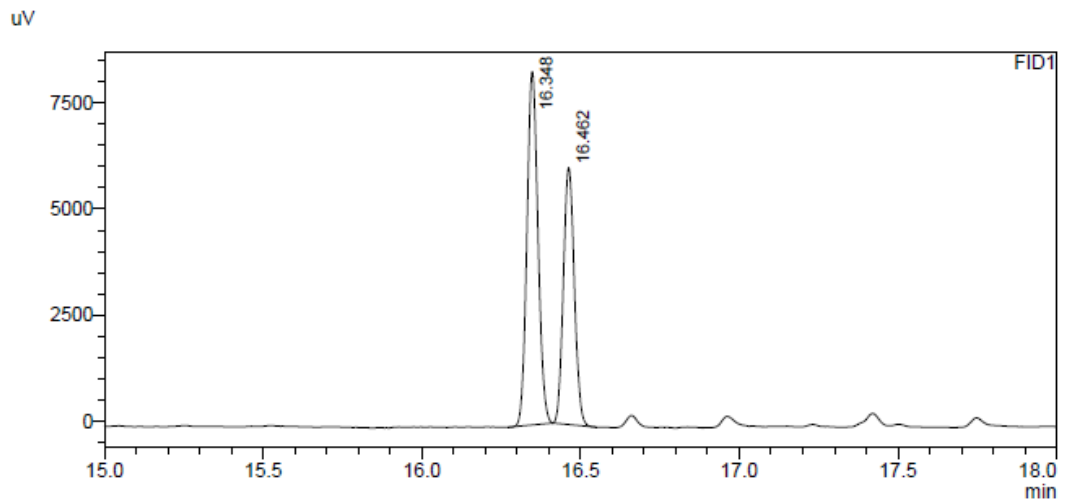

FID1

| Peak# | Ret. Time | Area  | Area%   |
|-------|-----------|-------|---------|
| 1     | 16.348    | 20091 | 58.038  |
| 2     | 16.462    | 14526 | 41.962  |
| Total |           | 34618 | 100.000 |

### 3eq EtOH

Sample Name : t=72\_SOD\_493  
Sample ID :  
Data Filename : t=72\_SOD\_493.gcd  
Method Filename : Methode\_Chiral\_MUC\_2.gcm  
Batch Filename : batch\_chiral.gcb  
Vial # : 96  
Injection Volume : 1 uL  
Date Acquired : 26.01.2019 20:14:15  
Date Processed : 26.01.2019 20:57:18

uV

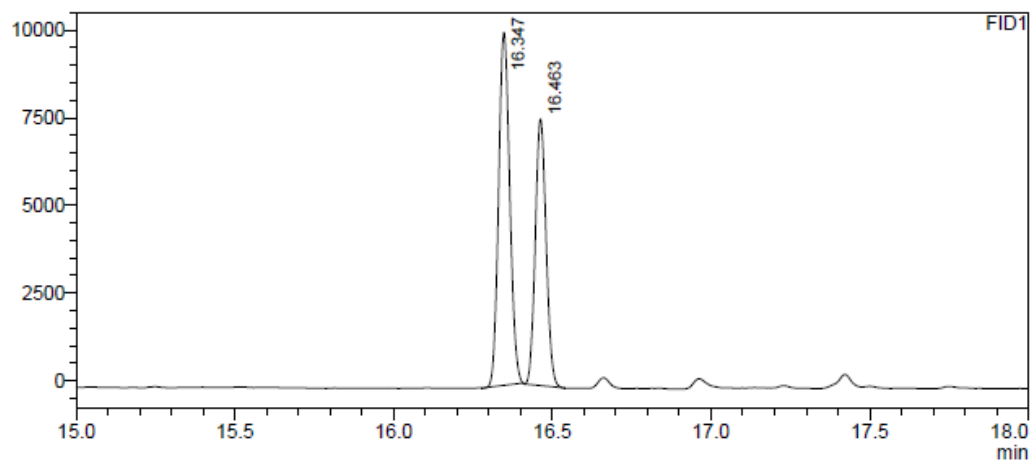

| Peak# | Ret. Time | Area  | Area%   |
|-------|-----------|-------|---------|
| 1     | 16.347    | 24545 | 57.677  |
| 2     | 16.463    | 18011 | 42.323  |
| Total |           | 42555 | 100.000 |

### 3eq *i*PrOH

Sample Name : t=72\_SOD\_496  
Sample ID :  
Data Filename : t=72\_SOD\_496.gcd  
Method Filename : Methode\_Chiral\_MUC\_2.gcm  
Batch Filename : batch\_chiral.gcb  
Vial # : 99  
Injection Volume : 1 uL  
Date Acquired : 26.01.2019 22:37:44  
Date Processed : 26.01.2019 23:20:48

uV

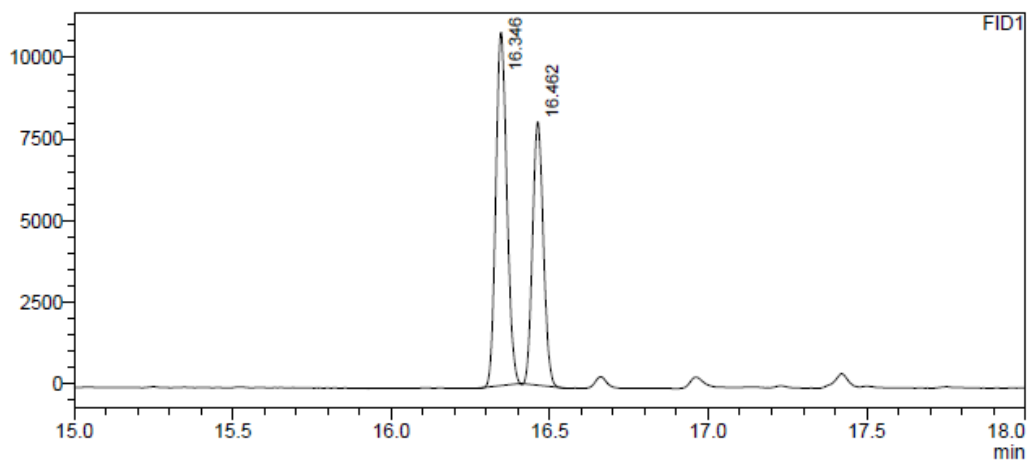

FID1

| Peak# | Ret. Time | Area  | Area%   |
|-------|-----------|-------|---------|
| 1     | 16.346    | 26204 | 57.752  |
| 2     | 16.462    | 19170 | 42.248  |
| Total |           | 45374 | 100.000 |

# Entry 5

6eq MeOH

Sample Name : t=72\_SOD\_478  
Sample ID :  
Data Filename : t=72\_SOD\_478.gcd  
Method Filename : Methode\_Chiral\_MUC\_2.gcm  
Batch Filename : batch\_chiral.gcb  
Vial # : 81  
Injection Volume : 1 uL  
Date Acquired : 26.01.2019 08:17:07  
Date Processed : 26.01.2019 09:00:11

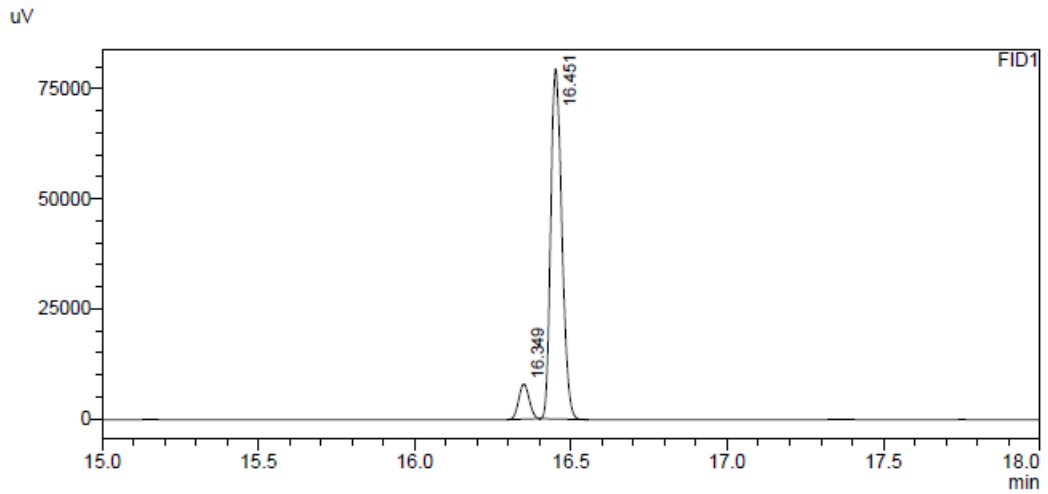

| Peak# | Ret. Time | Area   | Area%   |
|-------|-----------|--------|---------|
| 1     | 16.349    | 18658  | 8.627   |
| 2     | 16.451    | 197619 | 91.373  |
| Total |           | 216277 | 100.000 |



## 6eq EtOH

Sample Name : t=72\_SOD\_481  
Sample ID :  
Data Filename : t=72\_SOD\_481.gcd  
Method Filename : Methode\_Chiral\_MUC\_2.gcm  
Batch Filename : batch\_chiral.gcb  
Vial # : 84  
Injection Volume : 1 uL  
Date Acquired : 26.01.2019 10:40:32  
Date Processed : 26.01.2019 11:23:35

uV

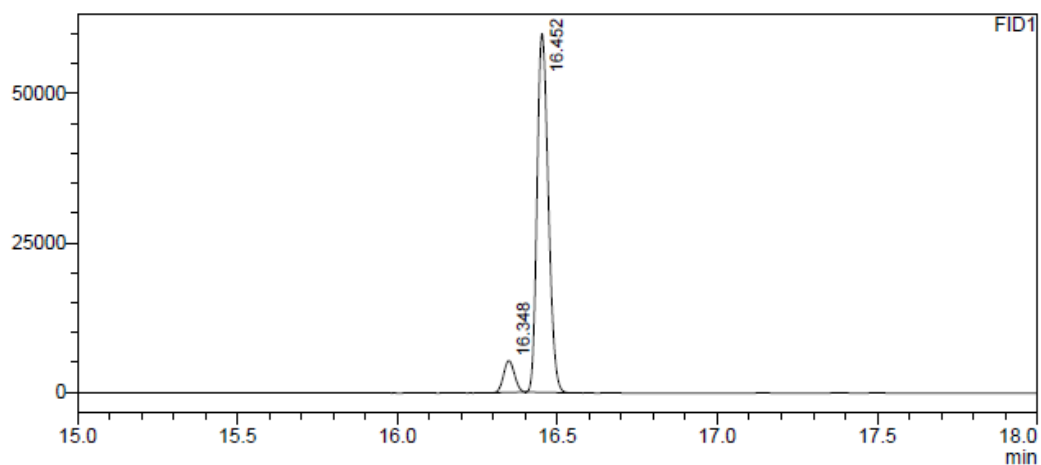

FID1

| Peak# | Ret. Time | Area   | Area%   |
|-------|-----------|--------|---------|
| 1     | 16.348    | 12611  | 7.890   |
| 2     | 16.452    | 147239 | 92.110  |
| Total |           | 159850 | 100.000 |

## 6eq *i*PrOH

Sample Name : t=72\_SOD\_484  
Sample ID :  
Data Filename : t=72\_SOD\_484.gcd  
Method Filename : Methode\_Chiral\_MUC\_2.gcm  
Batch Filename : batch\_chiral.gcb  
Vial # : 87  
Injection Volume : 1 uL  
Date Acquired : 26.01.2019 13:04:01  
Date Processed : 26.01.2019 13:47:06

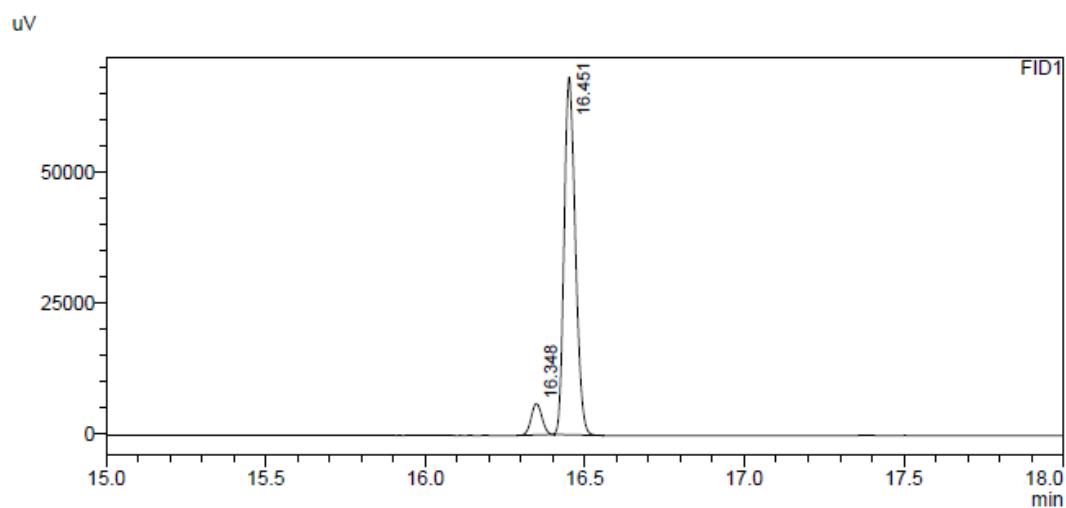

| Peak# | Ret. Time | Area   | Area%   |
|-------|-----------|--------|---------|
| 1     | 16.348    | 13985  | 7.746   |
| 2     | 16.451    | 166565 | 92.254  |
| Total |           | 180549 | 100.000 |

**Entry 6**  
**6eq MeOH**

Sample Name : t=72\_SOD\_491  
Sample ID :  
Data Filename : t=72\_SOD\_491.gcd  
Method Filename : Methode\_Chiral\_MUC\_2.gcm  
Batch Filename : batch\_chiral.gcb  
Vial # : 94  
Injection Volume : 1 uL  
Date Acquired : 26.01.2019 18:38:44  
Date Processed : 26.01.2019 19:21:47

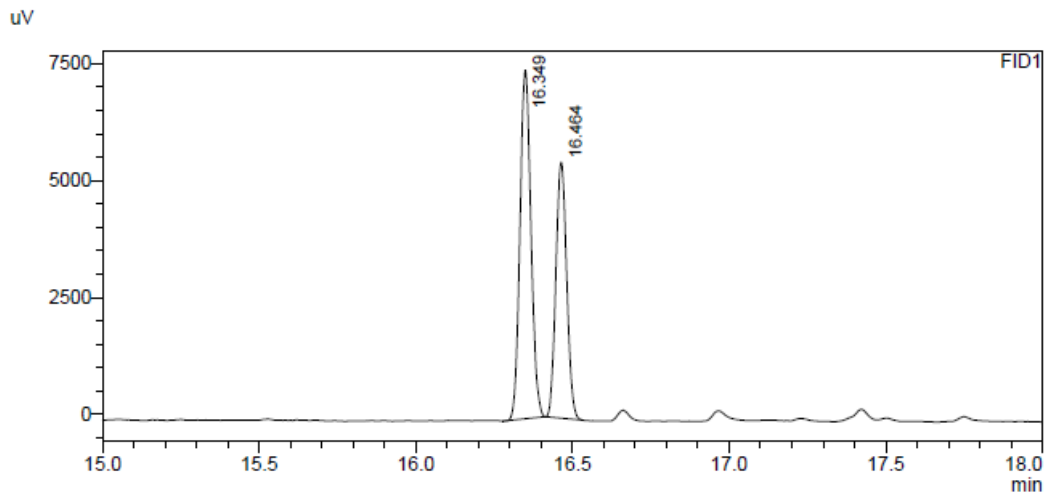

FID1

| Peak# | Ret. Time | Area  | Area%   |
|-------|-----------|-------|---------|
| 1     | 16.349    | 18159 | 58.026  |
| 2     | 16.464    | 13135 | 41.974  |
| Total |           | 31294 | 100.000 |

## 6eq EtOH

Sample Name : t=72\_SOD\_494  
Sample ID :  
Data Filename : t=72\_SOD\_494.gcd  
Method Filename : Methode\_Chiral\_MUC\_2.gcm  
Batch Filename : batch\_chiral.gcb  
Vial # : 97  
Injection Volume : 1 uL  
Date Acquired : 26.01.2019 21:02:05  
Date Processed : 26.01.2019 21:45:07

uV

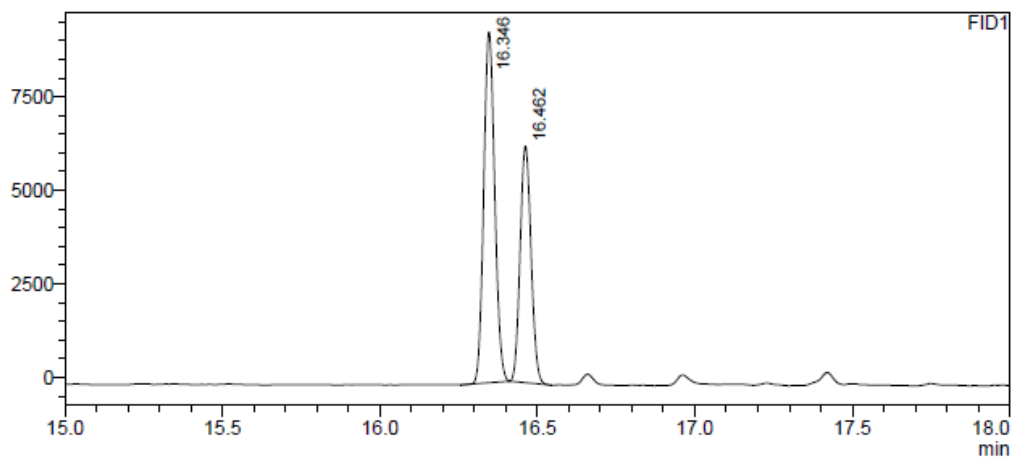

| Peak# | Ret. Time | Area  | Area%   |
|-------|-----------|-------|---------|
| 1     | 16.346    | 22732 | 59.798  |
| 2     | 16.462    | 15282 | 40.202  |
| Total |           | 38014 | 100.000 |

## 6eq *i*PrOH

Sample Name : t=72\_SOD\_497  
Sample ID :  
Data Filename : t=72\_SOD\_497.gcd  
Method Filename : Methode\_Chiral\_MUC\_2.gcm  
Batch Filename : batch\_chiral.gcb  
Vial # : 100  
Injection Volume : 1 uL  
Date Acquired : 26.01.2019 23:25:30  
Date Processed : 27.01.2019 00:08:34

uV

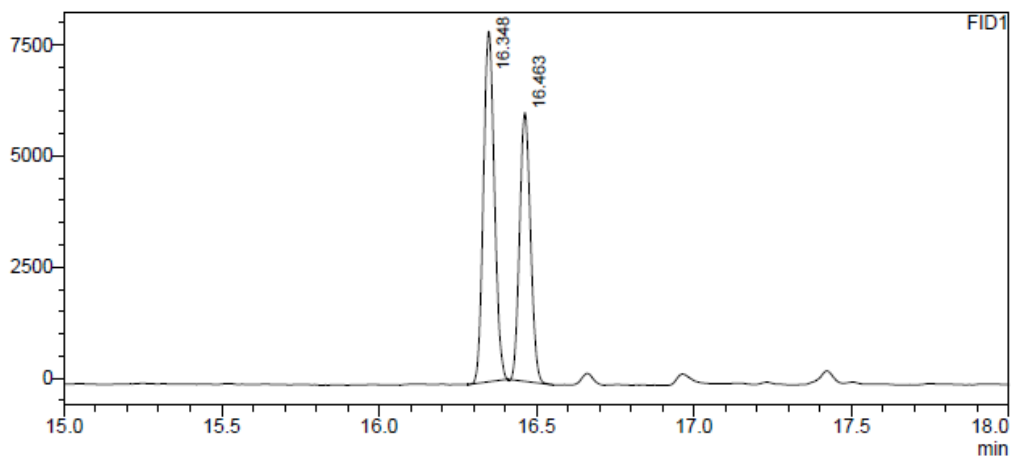

FID1

| Peak# | Ret. Time | Area  | Area%   |
|-------|-----------|-------|---------|
| 1     | 16.348    | 19108 | 56.862  |
| 2     | 16.463    | 14496 | 43.138  |
| Total |           | 33604 | 100.000 |

# Entry 7

9eq MeOH

Sample Name : t=72\_SOD\_479  
Sample ID :  
Data Filename : t=72\_SOD\_479.gcd  
Method Filename : Methode\_Chiral\_MUC\_2.gcm  
Batch Filename : batch\_chiral.gcb  
Vial # : 82  
Injection Volume : 1 uL  
Date Acquired : 26.01.2019 09:04:56  
Date Processed : 26.01.2019 09:47:59

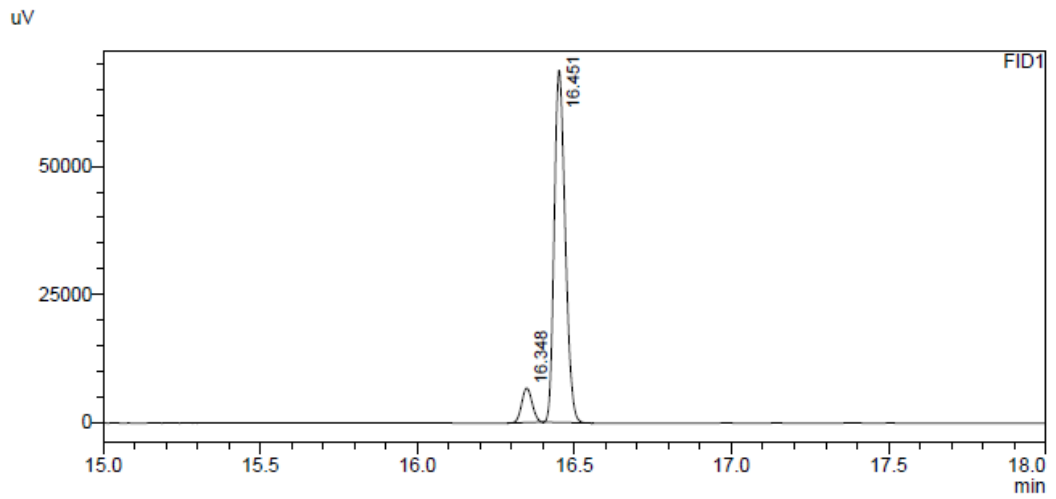

| Peak# | Ret. Time | Area   | Area%   |
|-------|-----------|--------|---------|
| 1     | 16.348    | 15652  | 8.550   |
| 2     | 16.451    | 167416 | 91.450  |
| Total |           | 183067 | 100.000 |

## 9eq EtOH

Sample Name : t=72\_SOD\_482  
Sample ID :  
Data Filename : t=72\_SOD\_482.gcd  
Method Filename : Methode\_Chiral\_MUC\_2.gcm  
Batch Filename : batch\_chiral.gcb  
Vial # : 85  
Injection Volume : 1 uL  
Date Acquired : 26.01.2019 11:28:23  
Date Processed : 26.01.2019 12:11:28

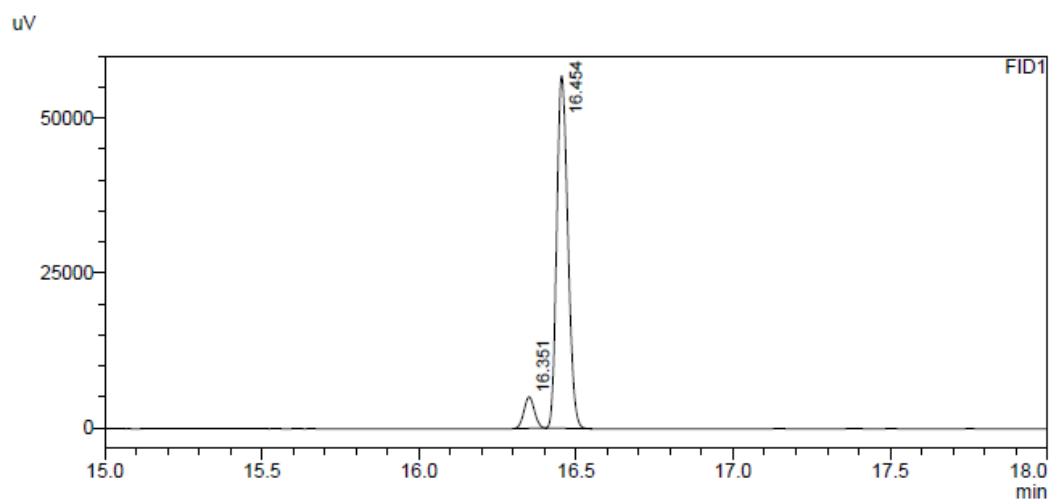

| Peak# | Ret. Time | Area   | Area%   |
|-------|-----------|--------|---------|
| 1     | 16.351    | 11819  | 7.765   |
| 2     | 16.454    | 140389 | 92.235  |
| Total |           | 152208 | 100.000 |

# 9eq *i*PrOH

Sample Name : t=72\_SOD\_485  
Sample ID :  
Data Filename : t=72\_SOD\_485.gcd  
Method Filename : Methode\_Chiral\_MUC\_2.gcm  
Batch Filename : batch\_chiral.gcb  
Vial # : 88  
Injection Volume : 1 uL  
Date Acquired : 26.01.2019 13:51:47  
Date Processed : 26.01.2019 14:34:50

uV

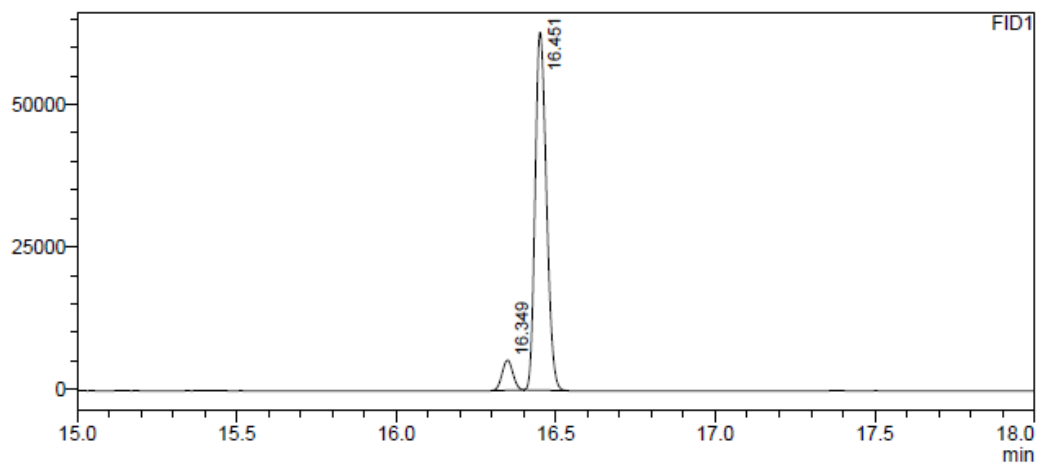

FID1

| Peak# | Ret. Time | Area   | Area%   |
|-------|-----------|--------|---------|
| 1     | 16.349    | 12495  | 7.467   |
| 2     | 16.451    | 154835 | 92.533  |
| Total |           | 167330 | 100.000 |



# Entry 8

9eq MeOH

Sample Name : t=72\_SOD\_492  
Sample ID :  
Data Filename : t=72\_SOD\_492.gcd  
Method Filename : Methode\_Chiral\_MUC\_2.gcm  
Batch Filename : batch\_chiral.gcb  
Vial # : 95  
Injection Volume : 1 uL  
Date Acquired : 26.01.2019 19:26:28  
Date Processed : 26.01.2019 20:09:31

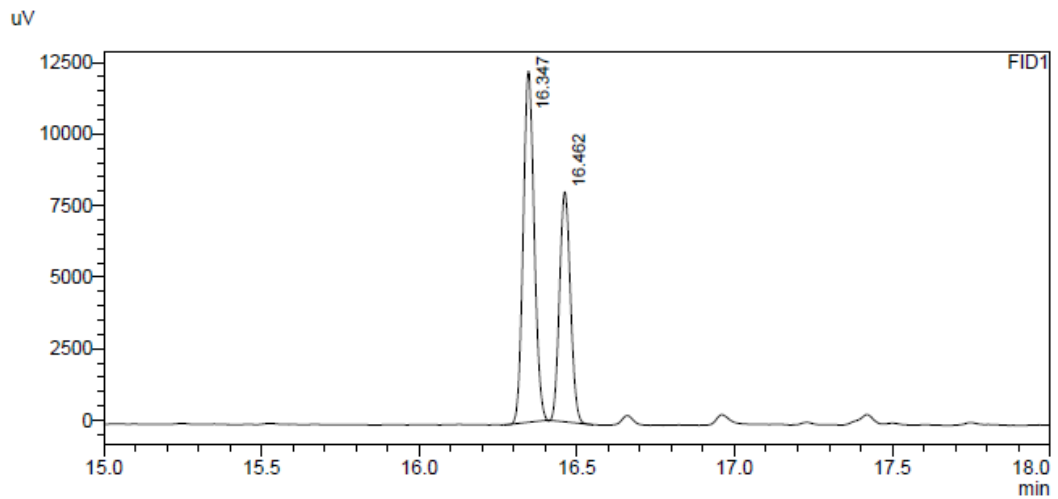

| Peak# | Ret. Time | Area  | Area%   |
|-------|-----------|-------|---------|
| 1     | 16.347    | 29681 | 60.480  |
| 2     | 16.462    | 19395 | 39.520  |
| Total |           | 49076 | 100.000 |

9eq EtOH

Sample Name : t=72\_SOD\_495  
Sample ID :  
Data Filename : t=72\_SOD\_495.gcd  
Method Filename : Methode\_Chiral\_MUC\_2.gcm  
Batch Filename : batch\_chiral.gcb  
Vial # : 98  
Injection Volume : 1 uL  
Date Acquired : 26.01.2019 21:49:55  
Date Processed : 26.01.2019 22:32:58

uV

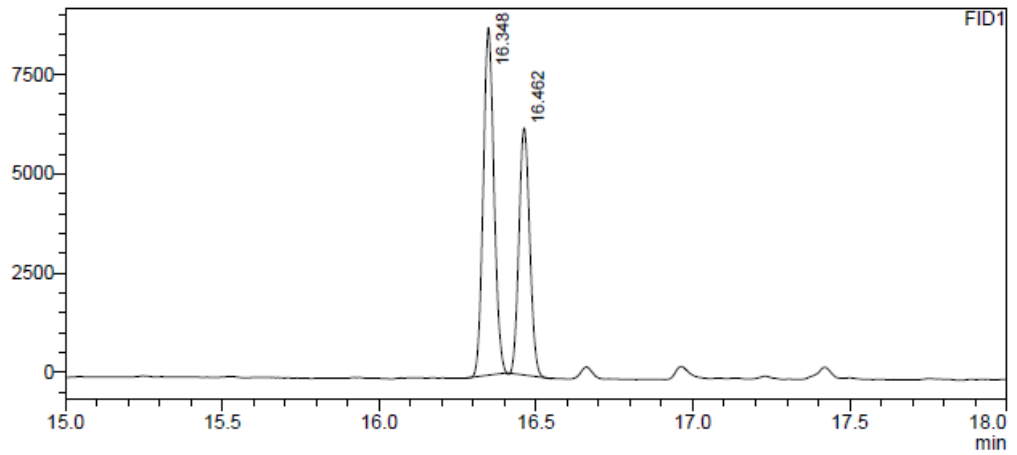

| Peak# | Ret. Time | Area  | Area%   |
|-------|-----------|-------|---------|
| 1     | 16.348    | 20872 | 58.358  |
| 2     | 16.462    | 14893 | 41.642  |
| Total |           | 35765 | 100.000 |

# 9eq *i*PrOH

Sample Name : t=72\_SOD\_498  
Sample ID :  
Data Filename : t=72\_SOD\_498.gcd  
Method Filename : Methode\_Chiral\_MUC\_2.gcm  
Batch Filename : batch\_chiral.gcb  
Vial # : 101  
Injection Volume : 1 uL  
Date Acquired : 27.01.2019 00:13:18  
Date Processed : 27.01.2019 00:56:23

uV

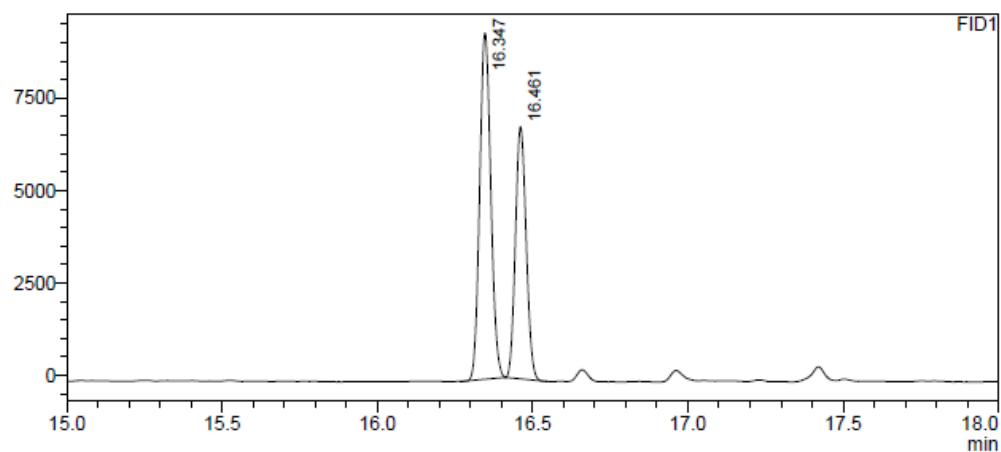

| Peak# | Ret. Time | Area  | Area%   |
|-------|-----------|-------|---------|
| 1     | 16.347    | 23283 | 58.660  |
| 2     | 16.461    | 16409 | 41.340  |
| Total |           | 39692 | 100.000 |

## 2.5 Chiral GC spectra of Table 1 of the manuscript (optimization of alcohol additive)

### Entry 1

Sample Name : t=72\_SOD\_654  
Sample ID :  
Data Filename : t=72\_SOD\_654.gcd  
Method Filename : Methode\_Chiral\_MUC\_2.gcm  
Batch Filename : batch\_chiral.gcb  
Vial # : 1  
Injection Volume : 1 uL  
Date Acquired : 28.03.2019 17:39:42  
Date Processed : 28.03.2019 18:22:46

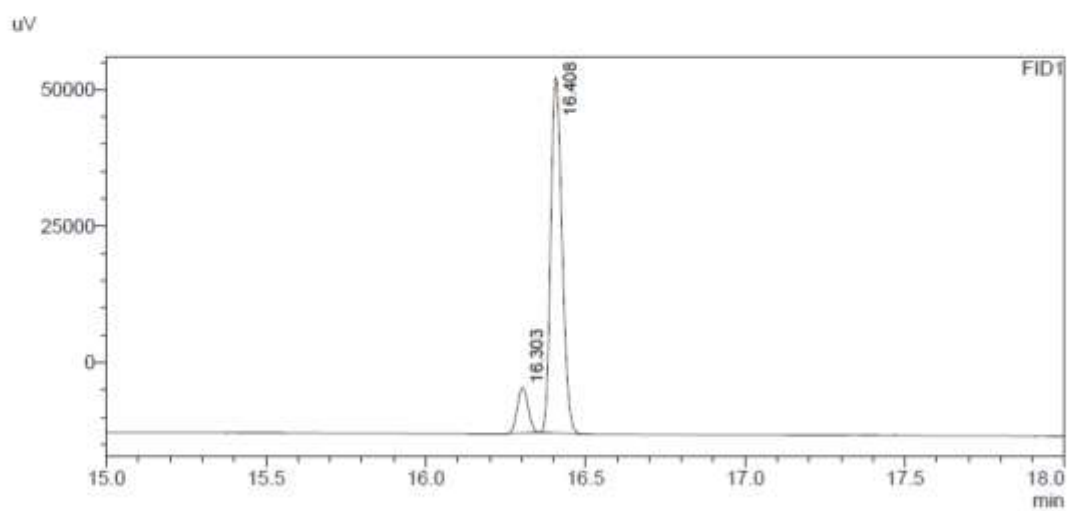

| Peak# | Ret. Time | Area   | Area%   |
|-------|-----------|--------|---------|
| 1     | 16.303    | 19706  | 10.963  |
| 2     | 16.408    | 160048 | 89.037  |
| Total |           | 179754 | 100.000 |

Sample Name : t=72\_SOD\_668  
Sample ID :  
Data Filename : t=72\_SOD\_668.gcd  
Method Filename : Methode\_Chiral\_MUC\_2.gcm  
Batch Filename : batch\_chiral.gcb  
Vial # : 1  
Injection Volume : 1 uL  
Date Acquired : 06.04.2019 12:21:01  
Date Processed : 06.04.2019 13:04:05

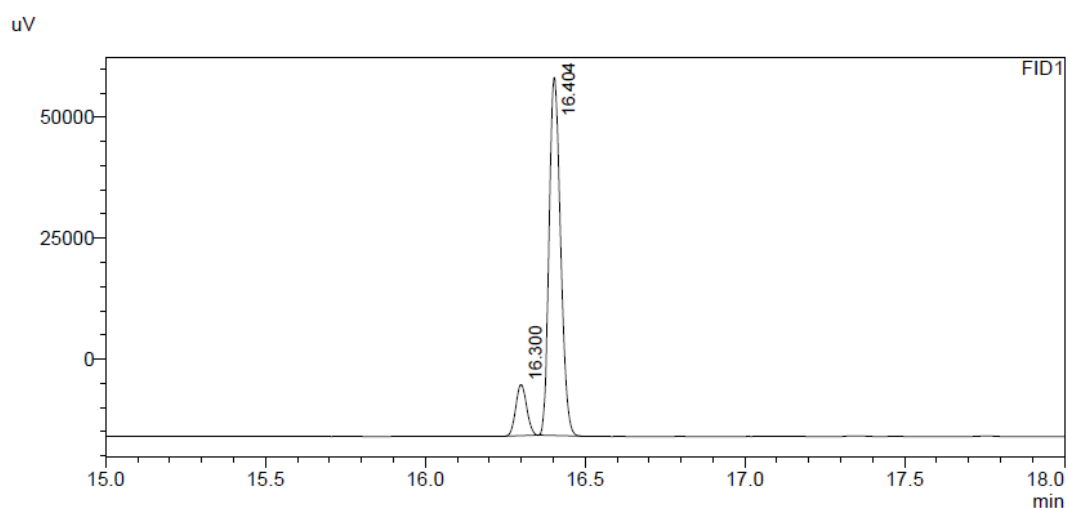

FID1

| Peak# | Ret. Time | Area   | Area%   |
|-------|-----------|--------|---------|
| 1     | 16.300    | 25013  | 11.902  |
| 2     | 16.404    | 185149 | 88.098  |
| Total |           | 210162 | 100.000 |

Sample Name : t=72\_SOD\_669  
Sample ID :  
Data Filename : t=72\_SOD\_669.gcd  
Method Filename : Methode\_Chiral\_MUC\_2.gcm  
Batch Filename : batch\_chiral.gcb  
Vial # : 2  
Injection Volume : 1 uL  
Date Acquired : 06.04.2019 13:08:48  
Date Processed : 06.04.2019 13:51:51

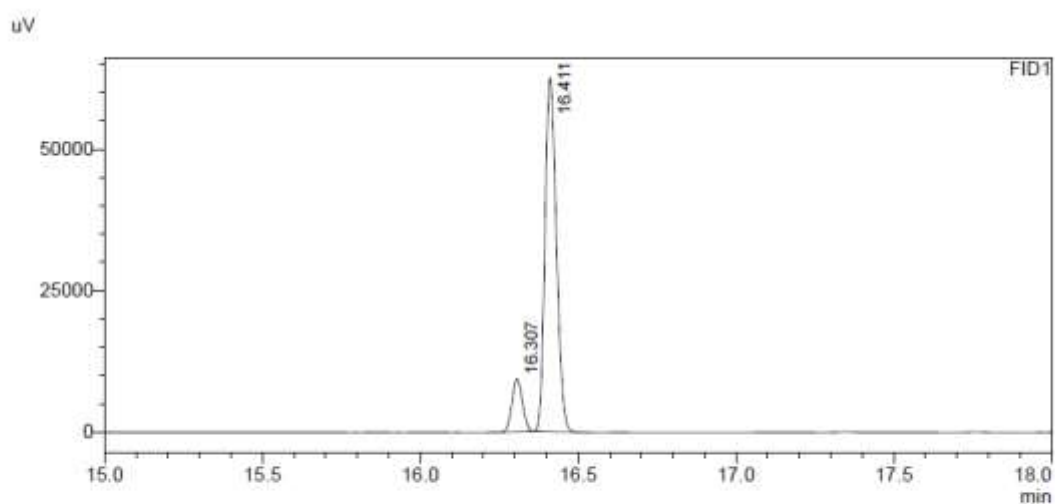

FID1

| Peak# | Ret. Time | Area   | Area%   |
|-------|-----------|--------|---------|
| 1     | 16.307    | 21534  | 12.079  |
| 2     | 16.411    | 156746 | 87.921  |
| Total |           | 178280 | 100.000 |

## Entry 2

Sample Name : t=72\_SOD\_479  
Sample ID :  
Data Filename : t=72\_SOD\_479.gcd  
Method Filename : Methode\_Chiral\_MUC\_2.gcm  
Batch Filename : batch\_chiral.gcb  
Vial # : 82  
Injection Volume : 1 uL  
Date Acquired : 26.01.2019 09:04:56  
Date Processed : 26.01.2019 09:47:59

uV

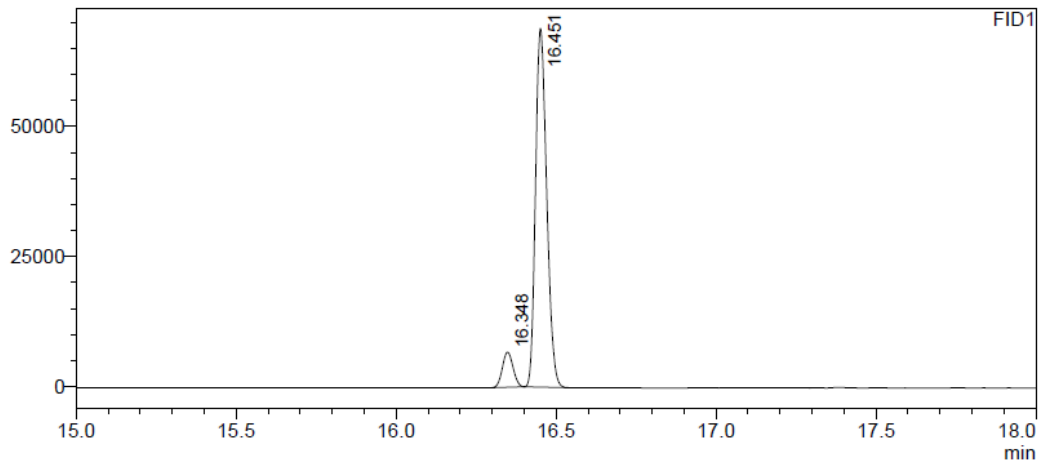

FID1

| Peak# | Ret. Time | Area   | Area%   |
|-------|-----------|--------|---------|
| 1     | 16.348    | 15652  | 8.550   |
| 2     | 16.451    | 167416 | 91.450  |
| Total |           | 183067 | 100.000 |

Sample Name : t=72\_SOD\_670  
Sample ID :  
Data Filename : t=72\_SOD\_670.gcd  
Method Filename : Methode\_Chiral\_MUC\_2.gcm  
Batch Filename : batch\_chiral.gcb  
Vial # : 3  
Injection Volume : 1 uL  
Date Acquired : 06.04.2019 13:56:35  
Date Processed : 06.04.2019 14:39:38

uV

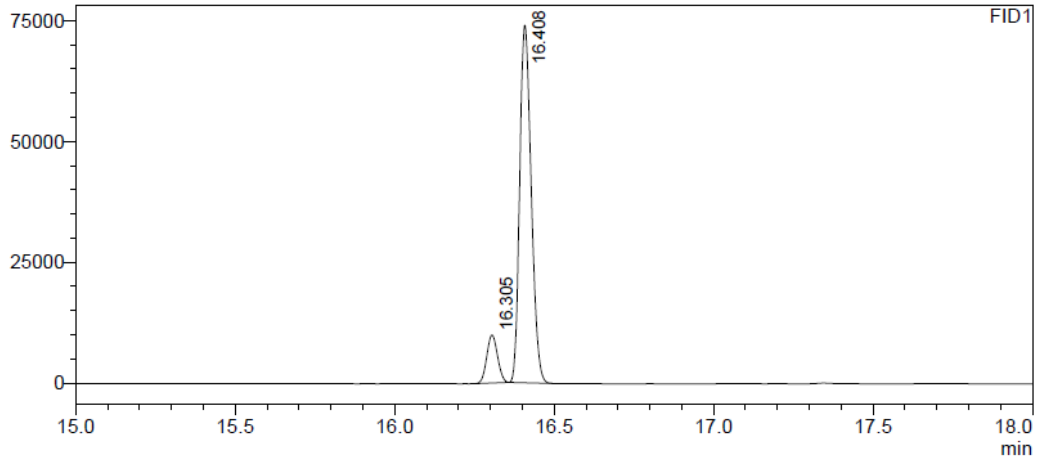

FID1

| Peak# | Ret. Time | Area   | Area%   |
|-------|-----------|--------|---------|
| 1     | 16.305    | 23307  | 11.141  |
| 2     | 16.408    | 185898 | 88.859  |
| Total |           | 209206 | 100.000 |



Sample Name : t=72\_SOD\_671  
Sample ID :  
Data Filename : t=72\_SOD\_671.gcd  
Method Filename : Methode\_Chiral\_MUC\_2.gcm  
Batch Filename : batch\_chiral.gcb  
Vial # : 4  
Injection Volume : 1 uL  
Date Acquired : 06.04.2019 14:44:24  
Date Processed : 06.04.2019 15:27:28

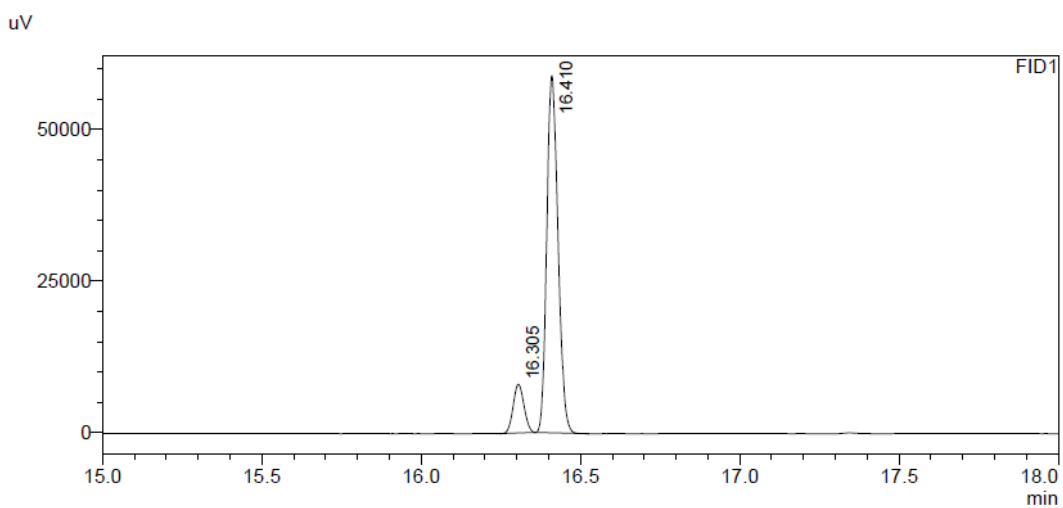

FID1

| Peak# | Ret. Time | Area   | Area%   |
|-------|-----------|--------|---------|
| 1     | 16.305    | 18906  | 11.542  |
| 2     | 16.410    | 144897 | 88.458  |
| Total |           | 163803 | 100.000 |

### Entry 3

Sample Name : t=72\_SOD\_655  
Sample ID :  
Data Filename : t=72\_SOD\_655.gcd  
Method Filename : Methode\_Chiral\_MUC\_2.gcm  
Batch Filename : batch\_chiral.gcb  
Vial # : 2  
Injection Volume : 1 uL  
Date Acquired : 28.03.2019 18:27:26  
Date Processed : 28.03.2019 19:10:31

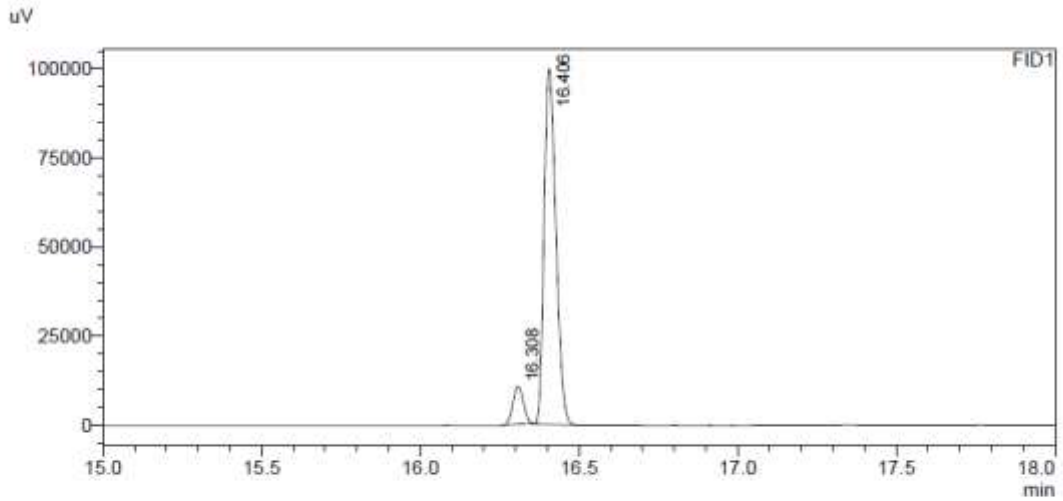

| Peak# | Ret. Time | Area   | Area%   |
|-------|-----------|--------|---------|
| 1     | 16.308    | 24553  | 8.701   |
| 2     | 16.406    | 257624 | 91.299  |
| Total |           | 282178 | 100.000 |

Sample Name : t=72\_SOD\_672  
Sample ID :  
Data Filename : t=72\_SOD\_672.gcd  
Method Filename : Methode\_Chiral\_MUC\_2.gcm  
Batch Filename : batch\_chiral.gcb  
Vial # : 5  
Injection Volume : 1 uL  
Date Acquired : 06.04.2019 15:32:13  
Date Processed : 06.04.2019 16:15:18

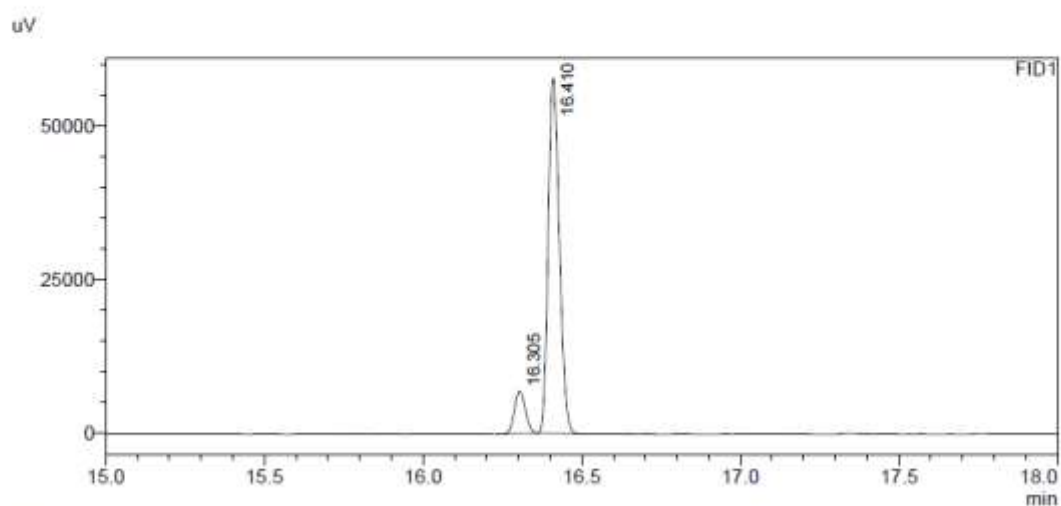

FID1

| Peak# | Ret. Time | Area   | Area%   |
|-------|-----------|--------|---------|
| 1     | 16.305    | 16614  | 10.525  |
| 2     | 16.410    | 141230 | 89.475  |
| Total |           | 157844 | 100.000 |

Sample Name : t=72\_SOD\_673  
Sample ID :  
Data Filename : t=72\_SOD\_673.gcd  
Method Filename : Methode\_Chiral\_MUC\_2.gcm  
Batch Filename : batch\_chiral.gcb  
Vial # : 6  
Injection Volume : 1 uL  
Date Acquired : 06.04.2019 16:20:00  
Date Processed : 06.04.2019 17:03:03

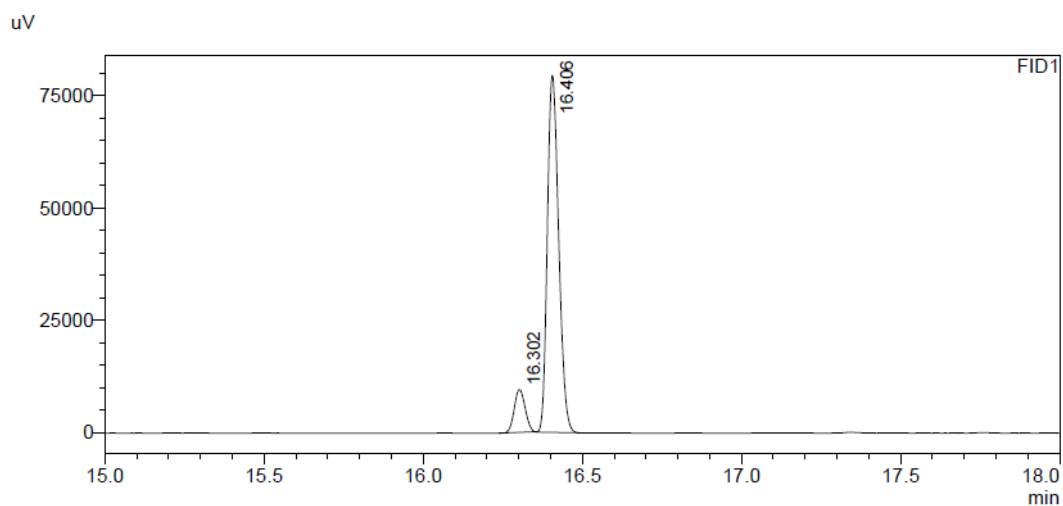

FID1

| Peak# | Ret. Time | Area   | Area%   |
|-------|-----------|--------|---------|
| 1     | 16.302    | 22595  | 10.295  |
| 2     | 16.406    | 196872 | 89.705  |
| Total |           | 219467 | 100.000 |

## Entry 4

Sample Name : t=72\_SOD\_656  
Sample ID :  
Data Filename : t=72\_SOD\_656.gcd  
Method Filename : Methode\_Chiral\_MUC\_2.gcm  
Batch Filename : batch\_chiral.gcb  
Vial # : 3  
Injection Volume : 1 uL  
Date Acquired : 28.03.2019 19:15:11  
Date Processed : 28.03.2019 19:58:15

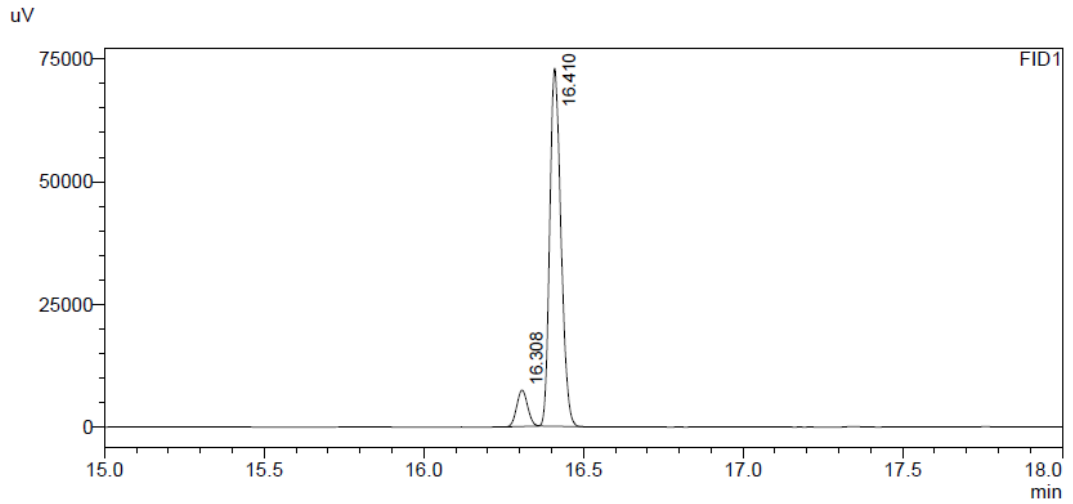

FID1

| Peak# | Ret. Time | Area   | Area%   |
|-------|-----------|--------|---------|
| 1     | 16.308    | 17524  | 8.950   |
| 2     | 16.410    | 178275 | 91.050  |
| Total |           | 195799 | 100.000 |

Sample Name : t=72\_SOD\_674  
Sample ID :  
Data Filename : t=72\_SOD\_674.gcd  
Method Filename : Methode\_Chiral\_MUC\_2.gcm  
Batch Filename : batch\_chiral.gcb  
Vial # : 7  
Injection Volume : 1 uL  
Date Acquired : 06.04.2019 17:07:46  
Date Processed : 06.04.2019 17:50:49

uV

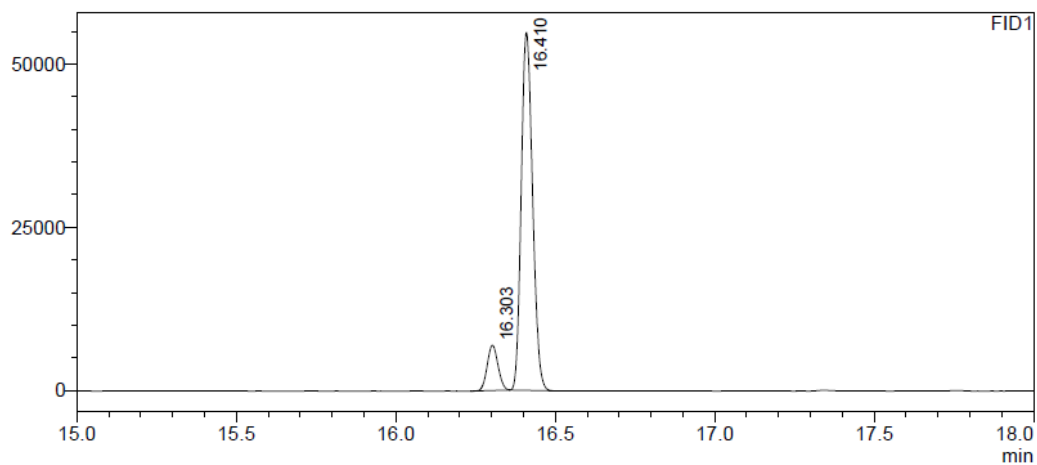

FID1

| Peak# | Ret. Time | Area   | Area%   |
|-------|-----------|--------|---------|
| 1     | 16.303    | 16294  | 10.725  |
| 2     | 16.410    | 135629 | 89.275  |
| Total |           | 151922 | 100.000 |

Sample Name : t=72\_SOD\_675  
Sample ID :  
Data Filename : t=72\_SOD\_675.gcd  
Method Filename : Methode\_Chiral\_MUC\_2.gcm  
Batch Filename : batch\_chiral.gcb  
Vial # : 8  
Injection Volume : 1 uL  
Date Acquired : 06.04.2019 17:55:34  
Date Processed : 06.04.2019 18:38:39

uV

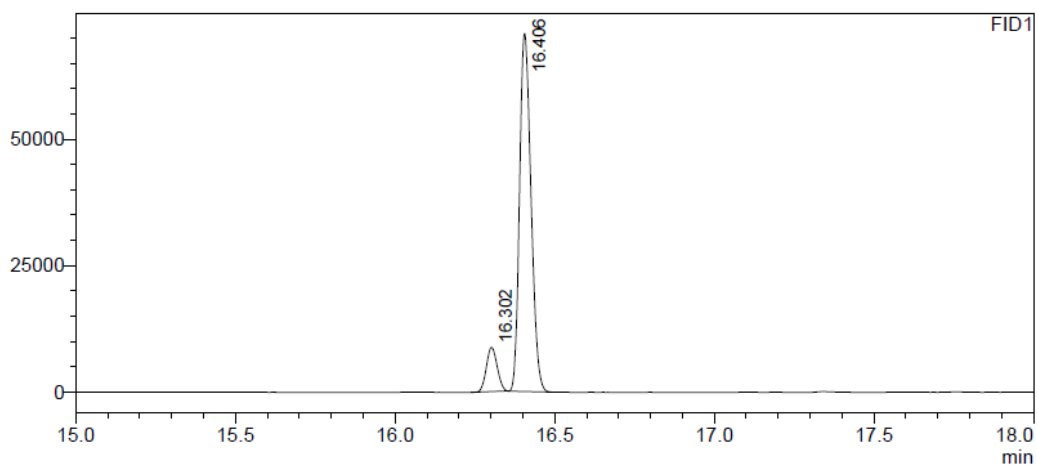

FID1

| Peak# | Ret. Time | Area   | Area%   |
|-------|-----------|--------|---------|
| 1     | 16.302    | 20559  | 10.428  |
| 2     | 16.406    | 176594 | 89.572  |
| Total |           | 197153 | 100.000 |

## Entry 5

Sample Name : t=72\_SOD\_485  
Sample ID :  
Data Filename : t=72\_SOD\_485.gcd  
Method Filename : Methode\_Chiral\_MUC\_2.gcm  
Batch Filename : batch\_chiral.gcb  
Vial # : 88  
Injection Volume : 1 uL  
Date Acquired : 26.01.2019 13:51:47  
Date Processed : 26.01.2019 14:34:50

uV

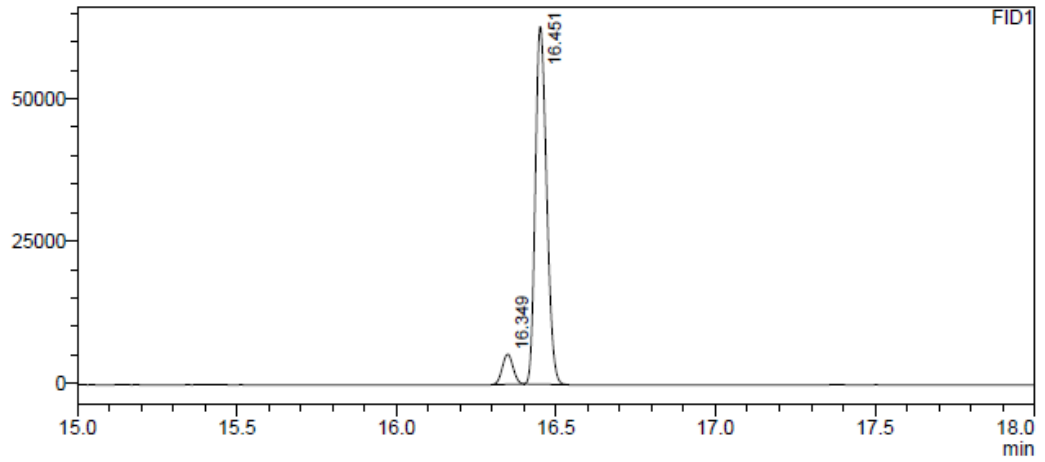

FID1

| Peak# | Ret. Time | Area   | Area%   |
|-------|-----------|--------|---------|
| 1     | 16.349    | 12495  | 7.467   |
| 2     | 16.451    | 154835 | 92.533  |
| Total |           | 167330 | 100.000 |



Sample Name : t=72\_SOD\_657  
Sample ID :  
Data Filename : t=72\_SOD\_657.gcd  
Method Filename : Methode\_Chiral\_MUC\_2.gcm  
Batch Filename : batch\_chiral.gcb  
Vial # : 4  
Injection Volume : 1 uL  
Date Acquired : 28.03.2019 20:02:52  
Date Processed : 28.03.2019 20:45:57

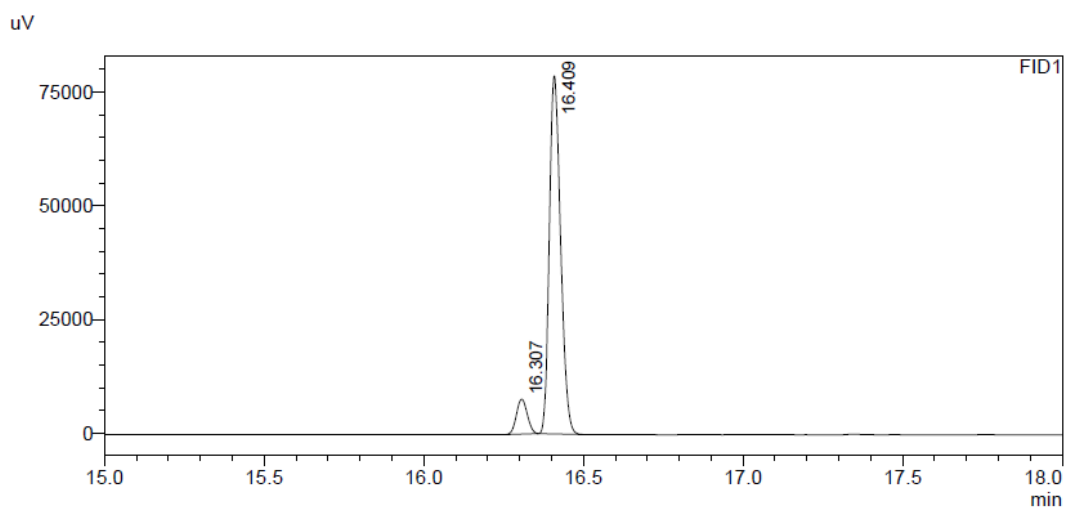

FID1

| Peak# | Ret. Time | Area   | Area%   |
|-------|-----------|--------|---------|
| 1     | 16.307    | 18076  | 8.563   |
| 2     | 16.409    | 193008 | 91.437  |
| Total |           | 211084 | 100.000 |

Sample Name : t=72\_SOD-936  
Sample ID :  
Data Filename : t=72\_SOD-936.gcd  
Method Filename : Methode\_Chiral\_MUC\_2.gcm  
Batch Filename : batch\_chiral.gcb  
Vial # : 45  
Injection Volume : 1 uL  
Date Acquired : 29.01.2020 00:07:17  
Date Processed : 30.01.2020 08:21:49

uV

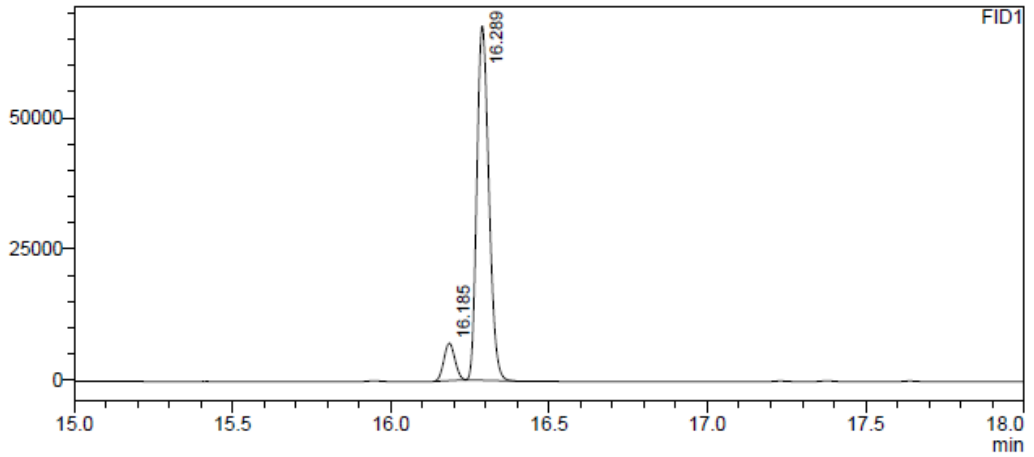

FID1

| Peak# | Ret. Time | Area   | Area%   |
|-------|-----------|--------|---------|
| 1     | 16.185    | 17315  | 8.845   |
| 2     | 16.289    | 178449 | 91.155  |
| Total |           | 195763 | 100.000 |

## Entry 6

Sample Name : t=72\_SOD\_658  
Sample ID :  
Data Filename : t=72\_SOD\_658.gcd  
Method Filename : Methode\_Chiral\_MUC\_2.gcm  
Batch Filename : batch\_chiral.gcb  
Vial # : 5  
Injection Volume : 1 uL  
Date Acquired : 28.03.2019 20:50:37  
Date Processed : 28.03.2019 21:33:40

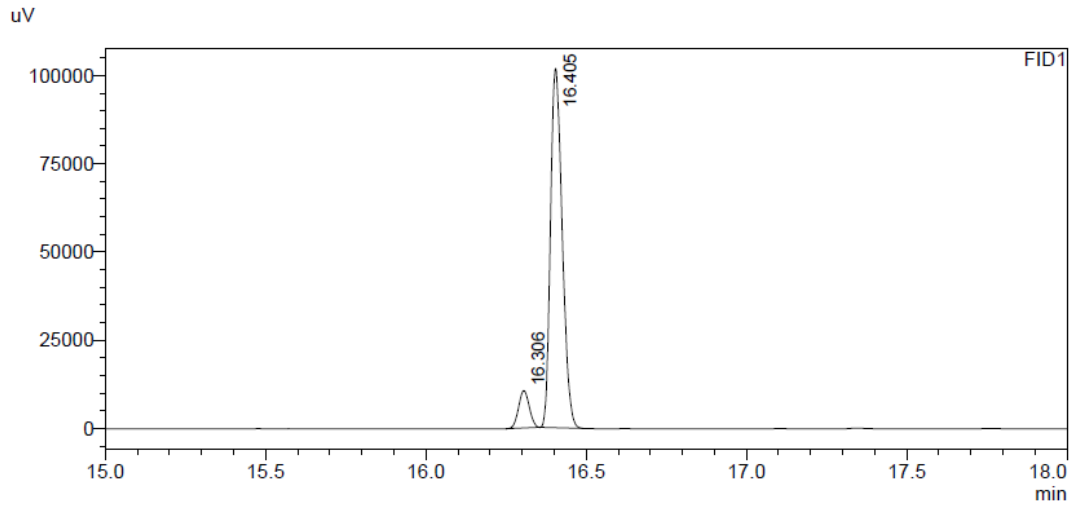

| Peak# | Ret. Time | Area   | Area%   |
|-------|-----------|--------|---------|
| 1     | 16.306    | 24401  | 8.603   |
| 2     | 16.405    | 259231 | 91.397  |
| Total |           | 283632 | 100.000 |

Sample Name : t=72\_SOD\_678  
Sample ID :  
Data Filename : t=72\_SOD\_678.gcd  
Method Filename : Methode\_Chiral\_MUC\_2.gcm  
Batch Filename : batch\_chiral.gcb  
Vial # : 11  
Injection Volume : 1 uL  
Date Acquired : 06.04.2019 20:18:59  
Date Processed : 06.04.2019 21:02:02

uV

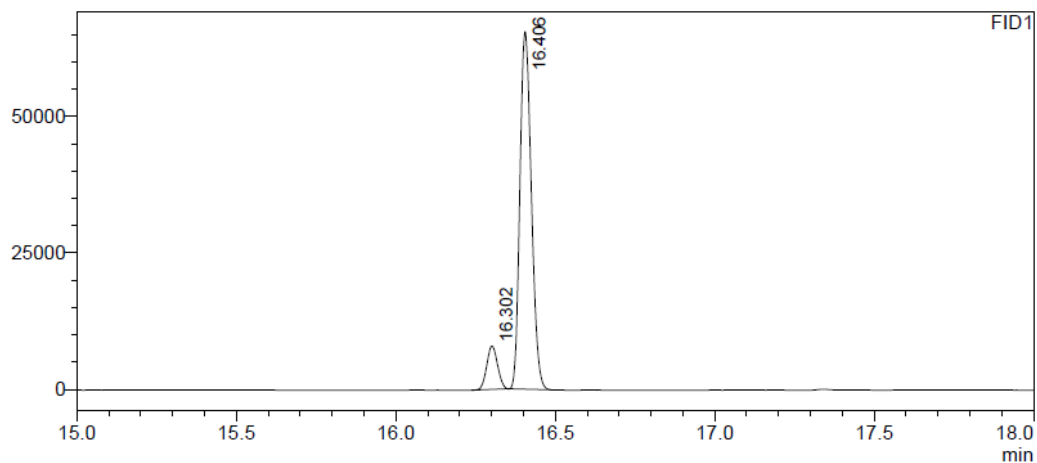

| Peak# | Ret. Time | Area   | Area%   |
|-------|-----------|--------|---------|
| 1     | 16.302    | 18742  | 10.275  |
| 2     | 16.406    | 163657 | 89.725  |
| Total |           | 182399 | 100.000 |

Sample Name : t=72\_SOD\_679  
Sample ID :  
Data Filename : t=72\_SOD\_679.gcd  
Method Filename : Methode\_Chiral\_MUC\_2.gcm  
Batch Filename : batch\_chiral.gcb  
Vial # : 12  
Injection Volume : 1 uL  
Date Acquired : 06.04.2019 21:06:50  
Date Processed : 06.04.2019 21:49:54

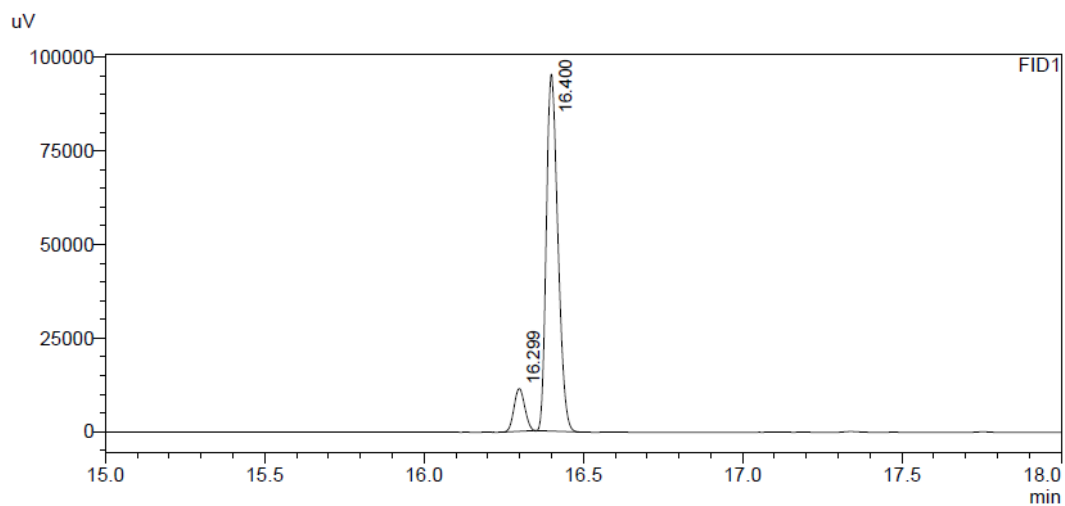

FID1

| Peak# | Ret. Time | Area   | Area%   |
|-------|-----------|--------|---------|
| 1     | 16.299    | 26794  | 10.000  |
| 2     | 16.400    | 241146 | 90.000  |
| Total |           | 267939 | 100.000 |

## 2.6 Chiral GC spectra of Fig. 3 of the manuscript and Table S5 (NLE studies)

### Entry 1

I, no *i*PrOH

Sample Name : t=72\_SOD-991  
Sample ID :  
Data Filename : t=72\_SOD-991.gcd  
Method Filename : Methode\_Chiral\_cyclohexyl\_aldehyde.gcm  
Batch Filename : batch\_chiral.gcb  
Vial # : 11  
Injection Volume : 1 uL  
Date Acquired : 20.02.2020 19:41:07  
Date Processed : 20.02.2020 21:12:11

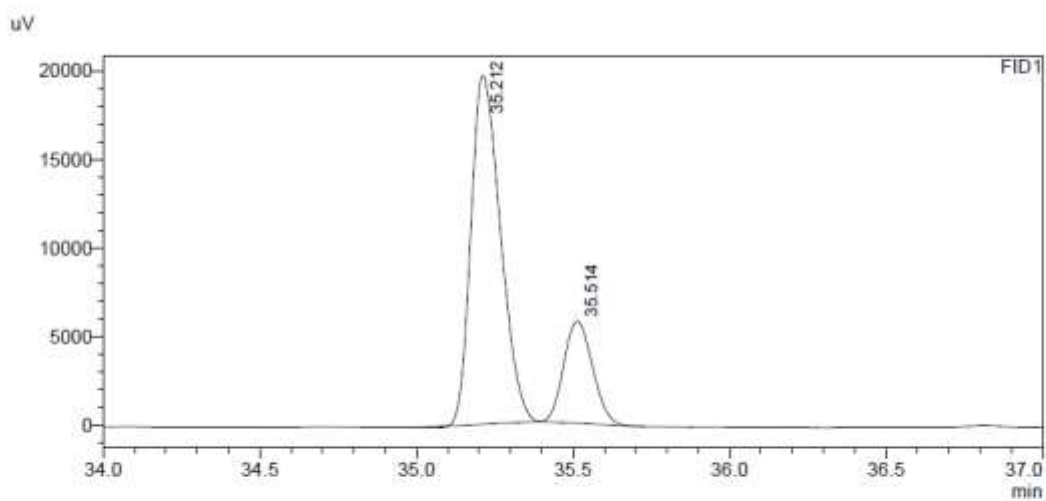

| Peak# | Ret. Time | Area   | Area%   |
|-------|-----------|--------|---------|
| 1     | 35.212    | 128730 | 77.739  |
| 2     | 35.514    | 36862  | 22.261  |
| Total |           | 165592 | 100.000 |

# I, *i*PrOH

Sample Name : t=72\_SOD-1002  
Sample ID :  
Data Filename : t=72\_SOD-1002.gcd  
Method Filename : Methode\_Chiral\_cyclohexyl\_aldehyde.gcm  
Batch Filename : batch\_chiral.gcb  
Vial # : 22  
Injection Volume : 1 uL  
Date Acquired : 21.02.2020 13:10:53  
Date Processed : 21.02.2020 14:41:57

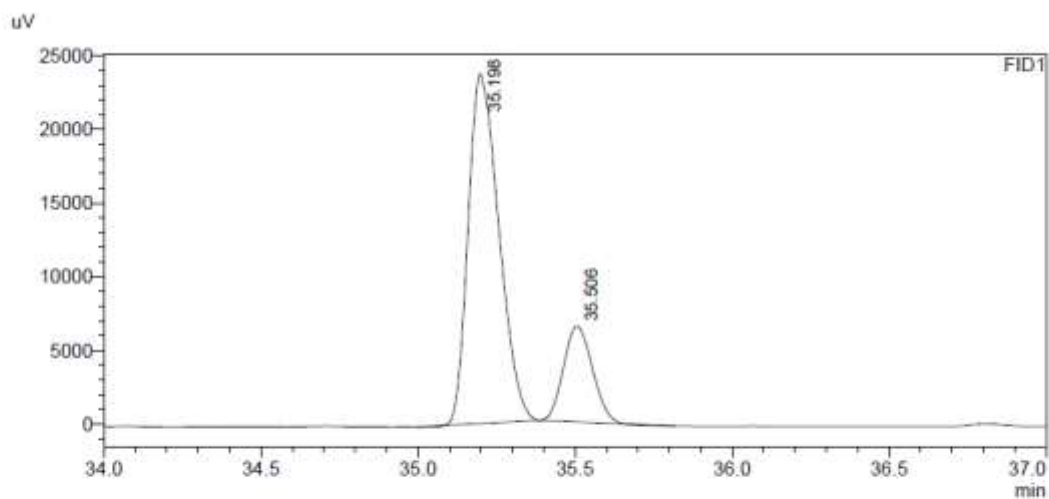

| Peak# | Ret. Time | Area   | Area%   |
|-------|-----------|--------|---------|
| 1     | 35.198    | 161117 | 79.571  |
| 2     | 35.506    | 41365  | 20.429  |
| Total |           | 202482 | 100.000 |

No I, no *i*PrOH

Sample Name : t=72\_SOD-1013  
Sample ID :  
Data Filename : t=72\_SOD-1013.gcd  
Method Filename : Methode\_Chiral\_cyclohexyl\_aldehyde.gcm  
Batch Filename : batch\_chiral.gcb  
Vial # : 33  
Injection Volume : 1 uL  
Date Acquired : 22.02.2020 06:40:31  
Date Processed : 22.02.2020 08:11:33

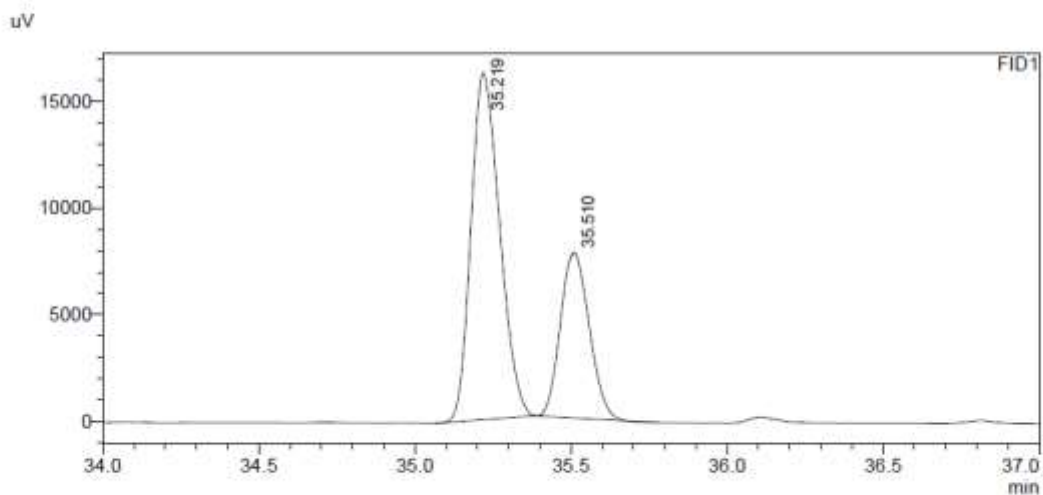

| Peak# | Ret. Time | Area   | Area%   |
|-------|-----------|--------|---------|
| 1     | 35.219    | 103926 | 67.552  |
| 2     | 35.510    | 49920  | 32.448  |
| Total |           | 153847 | 100.000 |



## Entry 2

I, no *i*PrOH

Sample Name : t=72\_SOD-990  
Sample ID :  
Data Filename : t=72\_SOD-990.gcd  
Method Filename : Methode\_Chiral\_cyclohexyl\_aldehyde.gcm  
Batch Filename : batch\_chiral.gcb  
Vial # : 10  
Injection Volume : 1 uL  
Date Acquired : 20.02.2020 18:05:38  
Date Processed : 20.02.2020 19:36:41

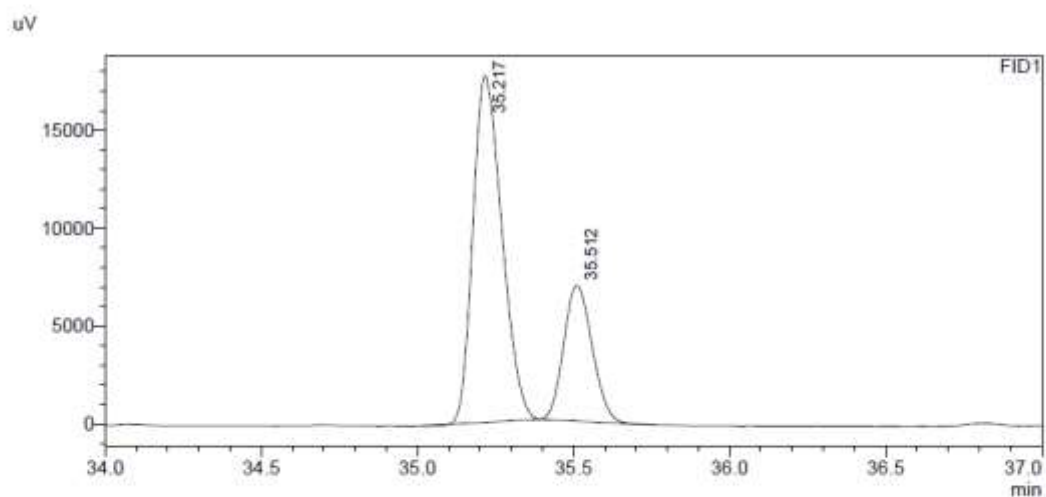

| Peak# | Ret. Time | Area   | Area%   |
|-------|-----------|--------|---------|
| 1     | 35.217    | 114133 | 72.144  |
| 2     | 35.512    | 44069  | 27.856  |
| Total |           | 158202 | 100.000 |

# I, *i*PrOH

Sample Name : t=72\_SOD-1001  
Sample ID :  
Data Filename : t=72\_SOD-1001.gcd  
Method Filename : Methode\_Chiral\_cyclohexyl\_aldehyde.gcm  
Batch Filename : batch\_chiral.gcb  
Vial # : 21  
Injection Volume : 1 uL  
Date Acquired : 21.02.2020 11:35:27  
Date Processed : 21.02.2020 13:06:31

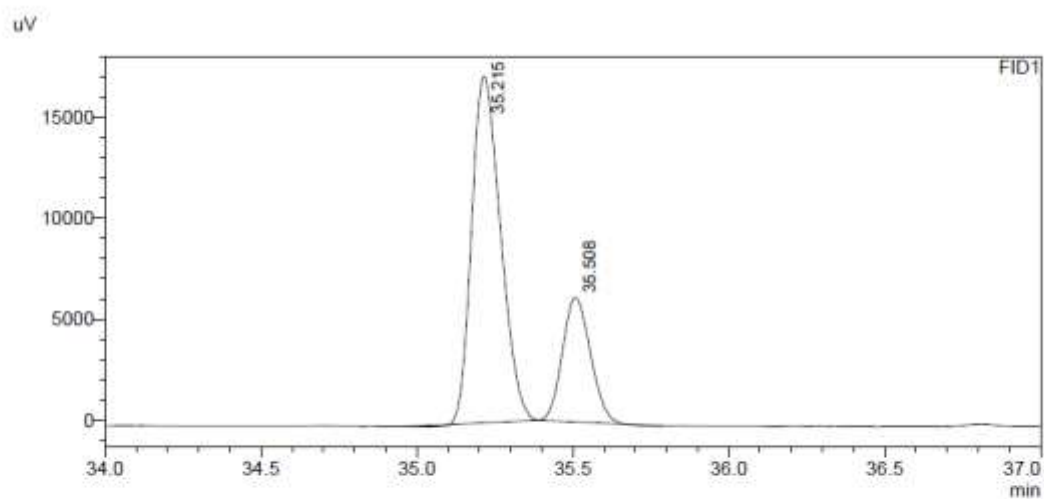

FID1

| Peak# | Ret. Time | Area   | Area%   |
|-------|-----------|--------|---------|
| 1     | 35.215    | 110274 | 74.123  |
| 2     | 35.508    | 38498  | 25.877  |
| Total |           | 148771 | 100.000 |

No I, no *i*PrOH

Sample Name : t-72\_SOD-1012  
Sample ID :  
Data Filename : t-72\_SOD-1012.gcd  
Method Filename : Methode\_Chiral\_cyclohexyl\_aldehyde.gcm  
Batch Filename : batch\_chiral.gcb  
Vial # : 32  
Injection Volume : 1 uL  
Date Acquired : 22.02.2020 05:05:05  
Date Processed : 22.02.2020 06:36:10

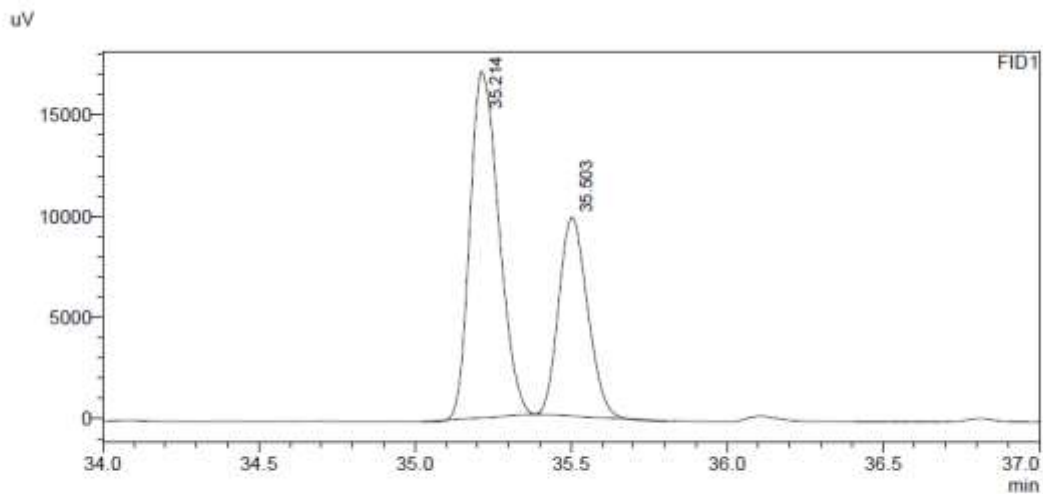

| Peak# | Ret. Time | Area   | Area%   |
|-------|-----------|--------|---------|
| 1     | 35.214    | 110354 | 63.654  |
| 2     | 35.503    | 63012  | 36.346  |
| Total |           | 173366 | 100.000 |

### Entry 3

I, no *i*PrOH

Sample Name : t=72\_SOD-989  
Sample ID :  
Data Filename : t=72\_SOD-989.gcd  
Method Filename : Methode\_Chiral\_cyclohexyl\_aldehyde.gcm  
Batch Filename : batch\_chiral.gcb  
Vial # : 9  
Injection Volume : 1 uL  
Date Acquired : 20.02.2020 16:30:16  
Date Processed : 20.02.2020 18:01:21

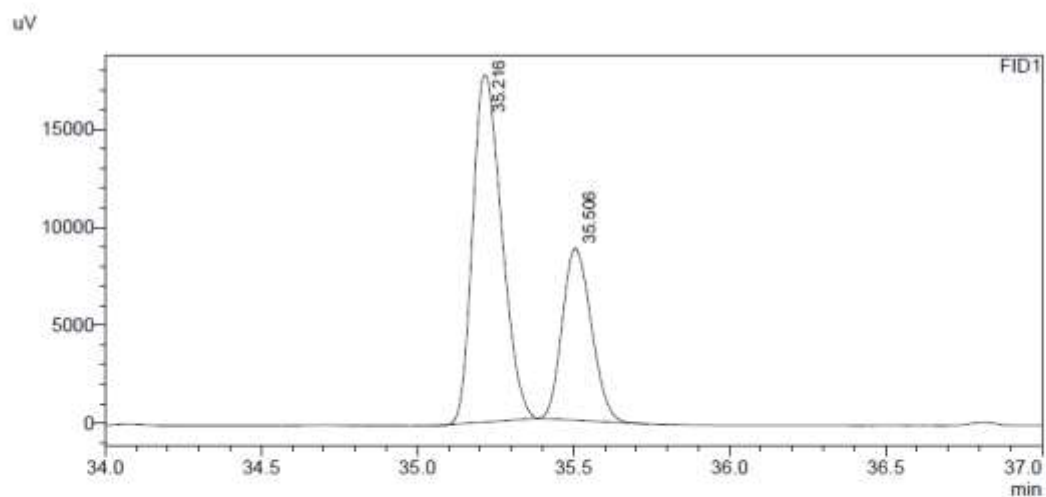

FID1

| Peak# | Ret. Time | Area   | Area%   |
|-------|-----------|--------|---------|
| 1     | 35.216    | 114735 | 66.852  |
| 2     | 35.506    | 56890  | 33.148  |
| Total |           | 171625 | 100.000 |

# I, *i*PrOH

Sample Name : t=72\_SOD-1000  
Sample ID :  
Data Filename : t=72\_SOD-1000.gcd  
Method Filename : Methode\_Chiral\_cyclohexyl\_aldehyde.gcm  
Batch Filename : batch\_chiral.gcb  
Vial # : 20  
Injection Volume : 1 uL  
Date Acquired : 21.02.2020 10:00:01  
Date Processed : 21.02.2020 11:31:05

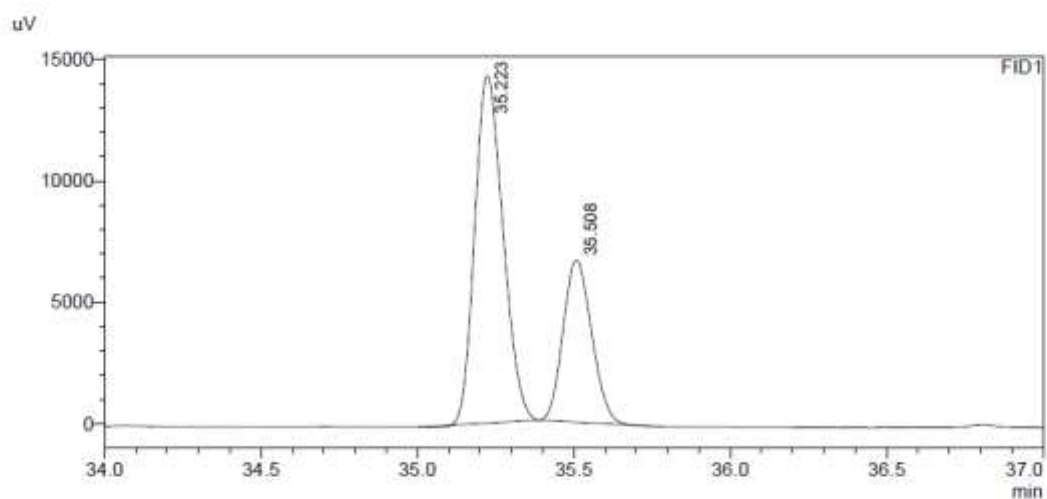

| Peak# | Ret. Time | Area   | Area%   |
|-------|-----------|--------|---------|
| 1     | 35.223    | 89836  | 67.841  |
| 2     | 35.508    | 42585  | 32.159  |
| Total |           | 132420 | 100.000 |

No I, no *i*PrOH

Sample Name : t=72\_SOD-1011  
Sample ID :  
Data Filename : t=72\_SOD-1011.gcd  
Method Filename : Methode\_Chiral\_cyclohexyl\_aldehyde.gcm  
Batch Filename : batch\_chiral.gcb  
Vial # : 31  
Injection Volume : 1 uL  
Date Acquired : 22.02.2020 03:29:42  
Date Processed : 22.02.2020 05:00:45

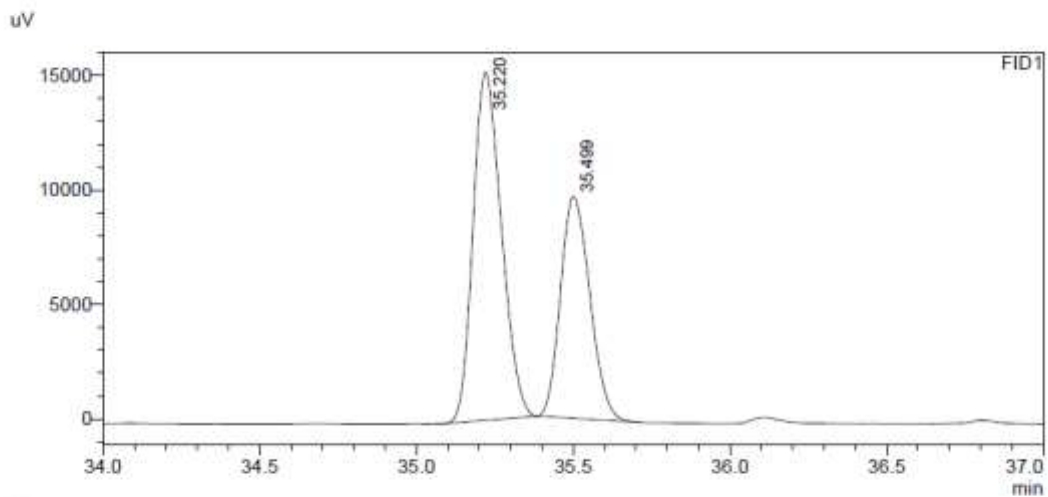

FID1

| Peak# | Ret. Time | Area   | Area%   |
|-------|-----------|--------|---------|
| 1     | 35.220    | 95610  | 60.172  |
| 2     | 35.499    | 63284  | 39.828  |
| Total |           | 158895 | 100.000 |

## Entry 4

I, no *i*PrOH

Sample Name : t=72\_SOD-988  
Sample ID :  
Data Filename : t=72\_SOD-988.gcd  
Method Filename : Methode\_Chiral\_cyclohexyl\_aldehyde.gcm  
Batch Filename : batch\_chiral.gcb  
Vial # : 8  
Injection Volume : 1 uL  
Date Acquired : 20.02.2020 14:54:51  
Date Processed : 20.02.2020 16:25:54

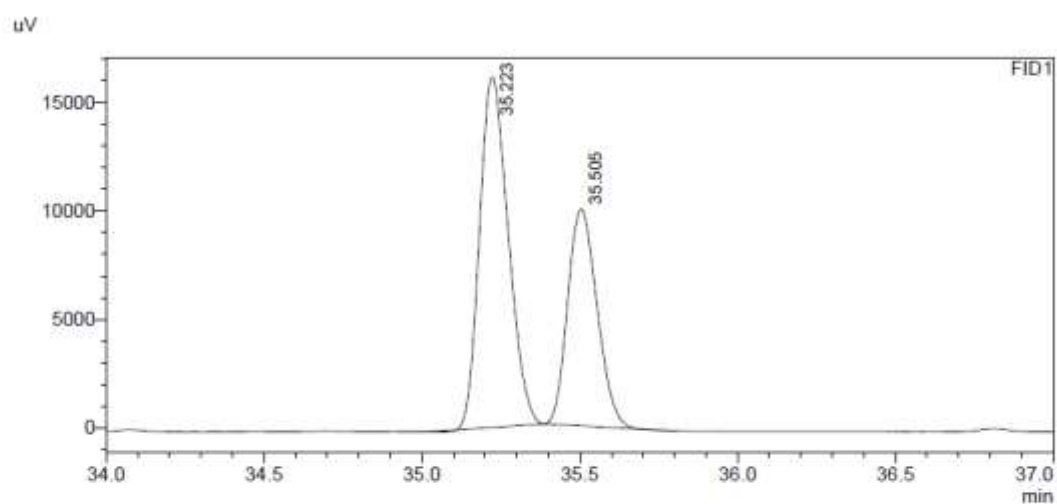

| Peak# | Ret. Time | Area   | Area%   |
|-------|-----------|--------|---------|
| 1     | 35.223    | 101965 | 61.154  |
| 2     | 35.505    | 64768  | 38.846  |
| Total |           | 166733 | 100.000 |

# I, *i*PrOH

Sample Name : t=72\_SOD-999  
Sample ID :  
Data Filename : t=72\_SOD-999.gcd  
Method Filename : Methode\_Chiral\_cyclohexyl\_aldehyde.gcm  
Batch Filename : batch\_chiral.gcb  
Vial # : 19  
Injection Volume : 1 uL  
Date Acquired : 21.02.2020 08:24:36  
Date Processed : 27.02.2020 14:40:40

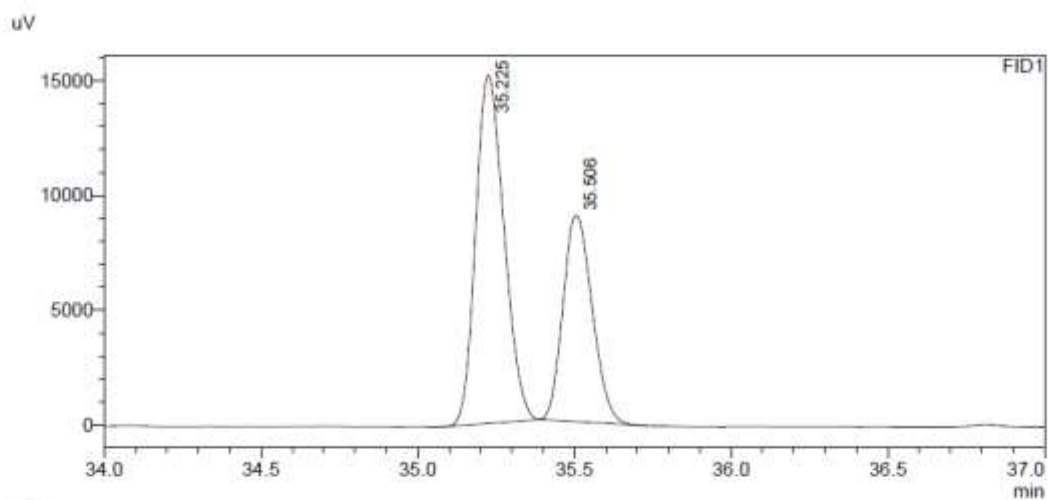

| Peak# | Ret. Time | Area   | Area%   |
|-------|-----------|--------|---------|
| 1     | 35.225    | 95398  | 62.086  |
| 2     | 35.506    | 58257  | 37.914  |
| Total |           | 153655 | 100.000 |



No I, no *i*PrOH

Sample Name : t=72\_SOD-1010  
Sample ID :  
Data Filename : t=72\_SOD-1010.gcd  
Method Filename : Methode\_Chiral\_cyclohexyl\_aldehyde.gcm  
Batch Filename : batch\_chiral.gcb  
Vial # : 30  
Injection Volume : 1  $\mu$ L  
Date Acquired : 22.02.2020 01:54:15  
Date Processed : 22.02.2020 03:25:19

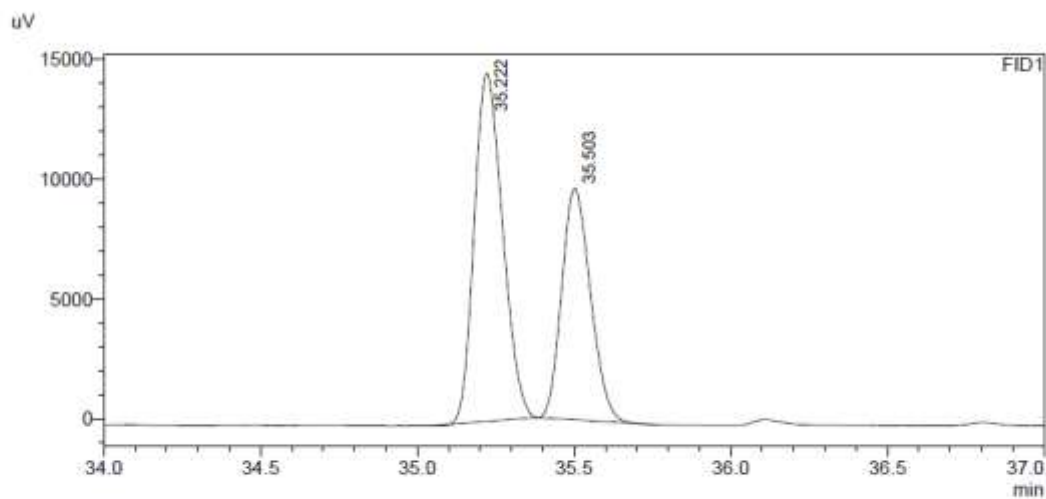

| Peak# | Ret. Time | Area   | Area%   |
|-------|-----------|--------|---------|
| 1     | 35.222    | 91512  | 59.671  |
| 2     | 35.503    | 61850  | 40.329  |
| Total |           | 153362 | 100.000 |

## Entry 5

I, no *i*PrOH

Sample Name : t=72\_SOD-987  
Sample ID :  
Data Filename : t=72\_SOD-987.gcd  
Method Filename : Methode\_Chiral\_cyclohexyl\_aldehyde.gcm  
Batch Filename : batch\_chiral.gcb  
Vial # : 7  
Injection Volume : 1 uL  
Date Acquired : 20.02.2020 13:19:26  
Date Processed : 20.02.2020 14:50:30

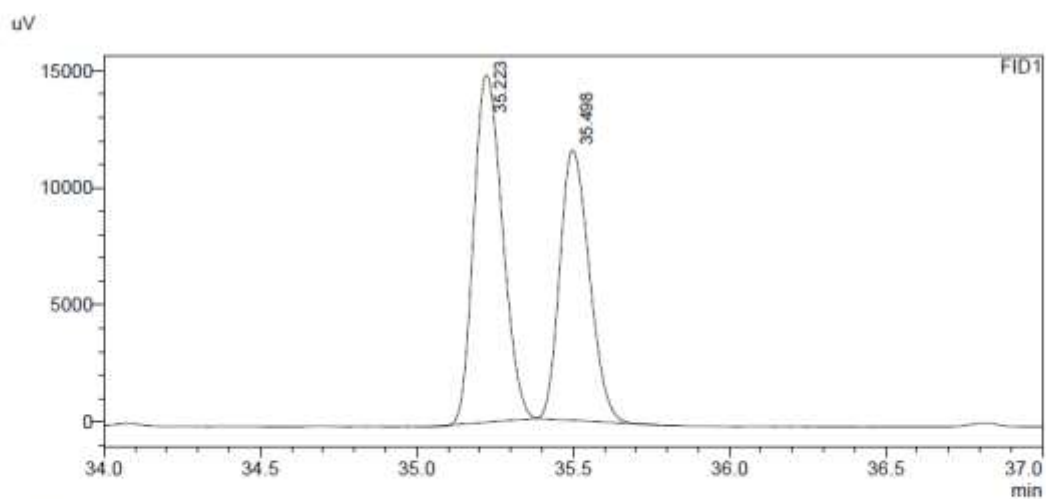

| Peak# | Ret. Time | Area   | Area%   |
|-------|-----------|--------|---------|
| 1     | 35.223    | 94964  | 55.594  |
| 2     | 35.498    | 75855  | 44.406  |
| Total |           | 170819 | 100.000 |

# I, *i*PrOH

Sample Name : t=72\_SOD-998  
Sample ID :  
Data Filename : t=72\_SOD-998.gcd  
Method Filename : Methode\_Chiral\_cyclohexyl\_aldehyde.gcm  
Batch Filename : batch\_chiral.gcb  
Vial # : 18  
Injection Volume : 1 uL  
Date Acquired : 21.02.2020 06:49:10  
Date Processed : 21.02.2020 08:20:15

uV

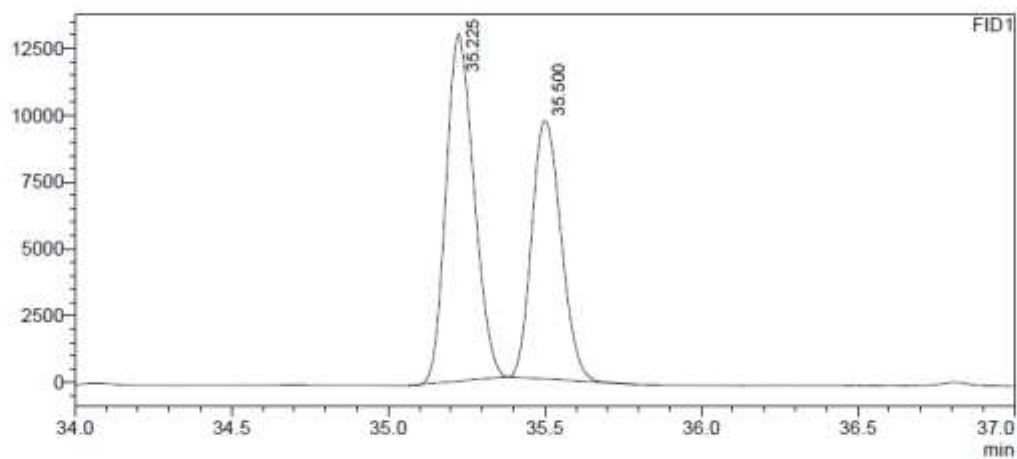

FID1

| Peak# | Ret. Time | Area   | Area%   |
|-------|-----------|--------|---------|
| 1     | 35.225    | 80691  | 56.153  |
| 2     | 35.500    | 63008  | 43.847  |
| Total |           | 143699 | 100.000 |

No I, no *i*PrOH

Sample Name : t=72\_SOD-1009  
Sample ID :  
Data Filename : t=72\_SOD-1009.gcd  
Method Filename : Methode\_Chiral\_cyclohexyl\_aldehyde.gcm  
Batch Filename : batch\_chiral.gcb  
Vial # : 29  
Injection Volume : 1 uL  
Date Acquired : 22.02.2020 00:18:49  
Date Processed : 22.02.2020 01:49:52

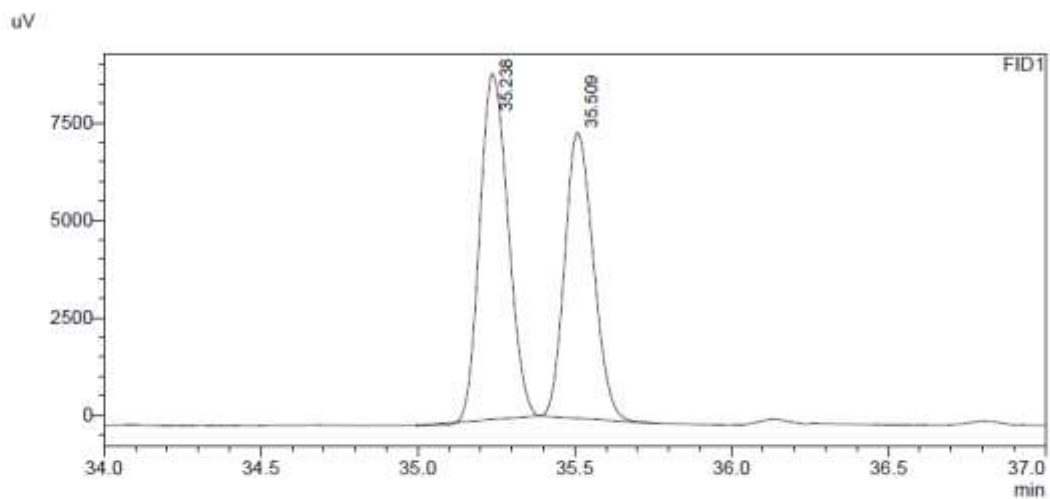

| Peak# | Ret. Time | Area   | Area%   |
|-------|-----------|--------|---------|
| 1     | 35.238    | 55349  | 54.302  |
| 2     | 35.509    | 46578  | 45.698  |
| Total |           | 101927 | 100.000 |

## Entry 6

I, no *i*PrOH

Sample Name : t=72\_SOD-986  
Sample ID :  
Data Filename : t=72\_SOD-986.gcd  
Method Filename : Methode\_Chiral\_cyclohexyl\_aldehyde.gcm  
Batch Filename : batch\_chiral.gcb  
Vial # : 6  
Injection Volume : 1 uL  
Date Acquired : 20.02.2020 11:44:00  
Date Processed : 20.02.2020 13:15:05

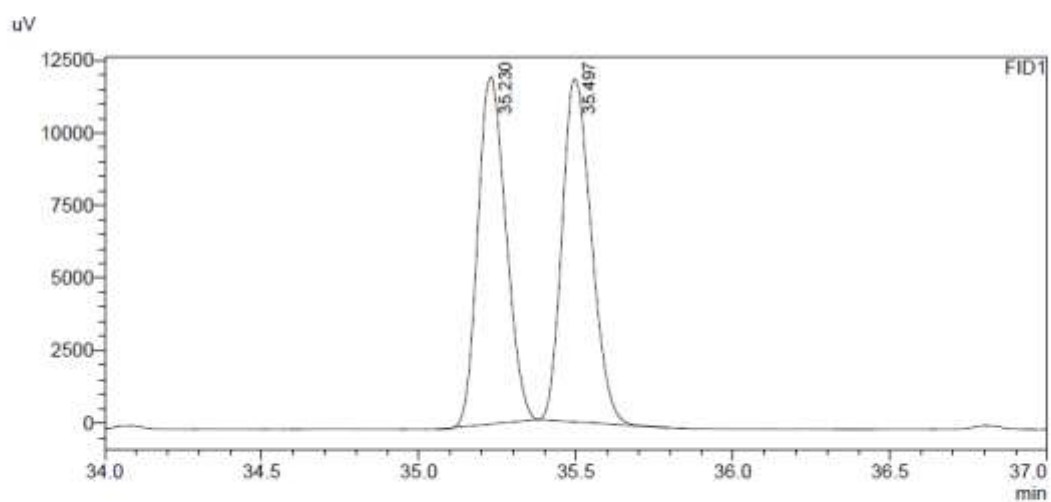

| Peak# | Ret. Time | Area   | Area%   |
|-------|-----------|--------|---------|
| 1     | 35.230    | 74580  | 49.355  |
| 2     | 35.497    | 76530  | 50.645  |
| Total |           | 151109 | 100.000 |

# I, *i*PrOH

Sample Name : t=72\_SOD-997  
Sample ID :  
Data Filename : t=72\_SOD-997.gcd  
Method Filename : Methode\_Chiral\_cyclohexyl\_aldehyde.gcm  
Batch Filename : batch\_chiral.gcb  
Vial # : 17  
Injection Volume : 1  $\mu$ L  
Date Acquired : 21.02.2020 05:13:42  
Date Processed : 21.02.2020 06:44:45

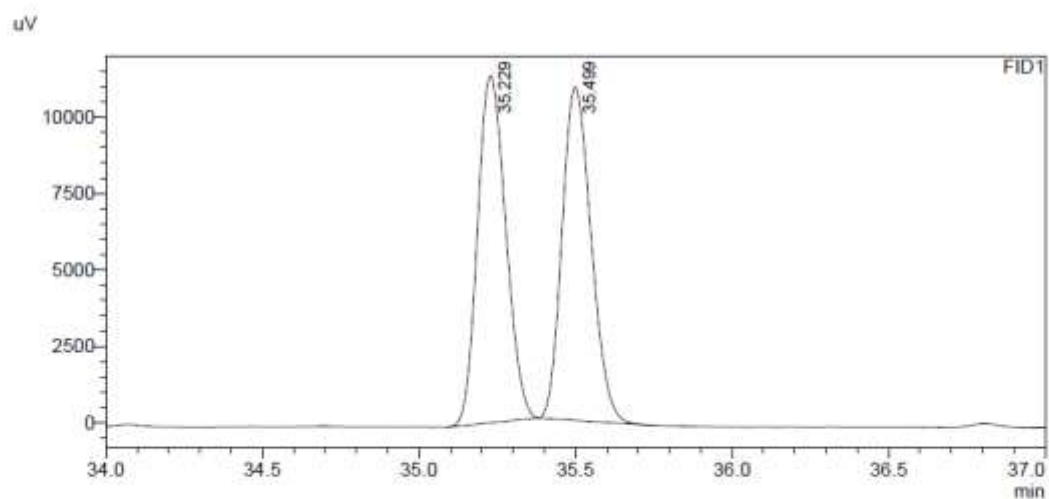

FID1

| Peak# | Ret. Time | Area   | Area%   |
|-------|-----------|--------|---------|
| 1     | 35.229    | 71147  | 50.215  |
| 2     | 35.499    | 70538  | 49.785  |
| Total |           | 141685 | 100.000 |

No I, no *i*PrOH

Sample Name : t=72\_SOD-1008  
Sample ID :  
Data Filename : t=72\_SOD-1008.gcd  
Method Filename : Methode\_Chiral\_cyclohexyl\_aldehyde.gcm  
Batch Filename : batch\_chiral.gcb  
Vial # : 28  
Injection Volume : 1 uL  
Date Acquired : 21.02.2020 22:43:24  
Date Processed : 22.02.2020 00:14:28

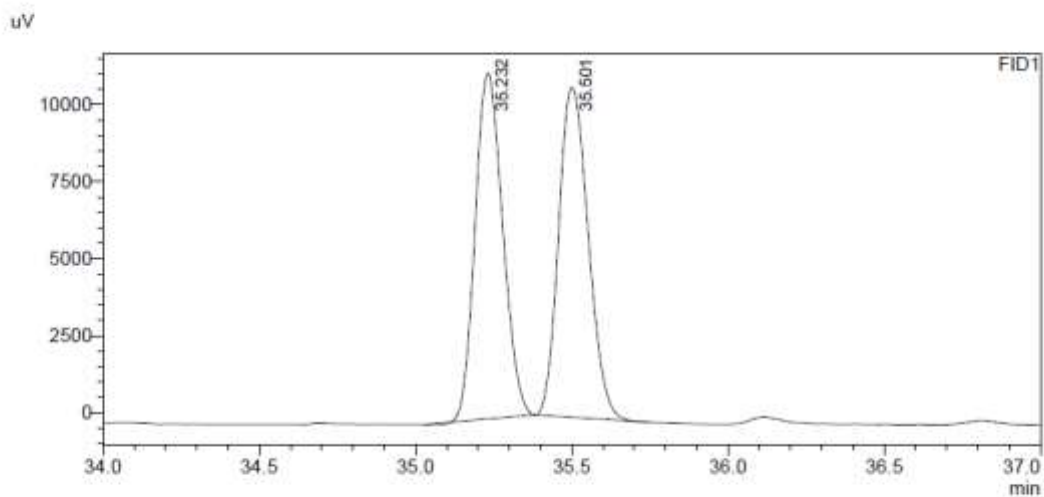

| Peak# | Ret. Time | Area   | Area%   |
|-------|-----------|--------|---------|
| 1     | 35.232    | 68797  | 49.370  |
| 2     | 35.501    | 70553  | 50.630  |
| Total |           | 139350 | 100.000 |

## Entry 7

I, no *i*PrOH

Sample Name : t=72\_SOD-985  
Sample ID :  
Data Filename : t=72\_SOD-985.gcd  
Method Filename : Methode\_Chiral\_cyclohexyl\_aldehyde.gcm  
Batch Filename : batch\_chiral.gcb  
Vial # : 5  
Injection Volume : 1 uL  
Date Acquired : 20.02.2020 10:08:38  
Date Processed : 20.02.2020 11:39:42

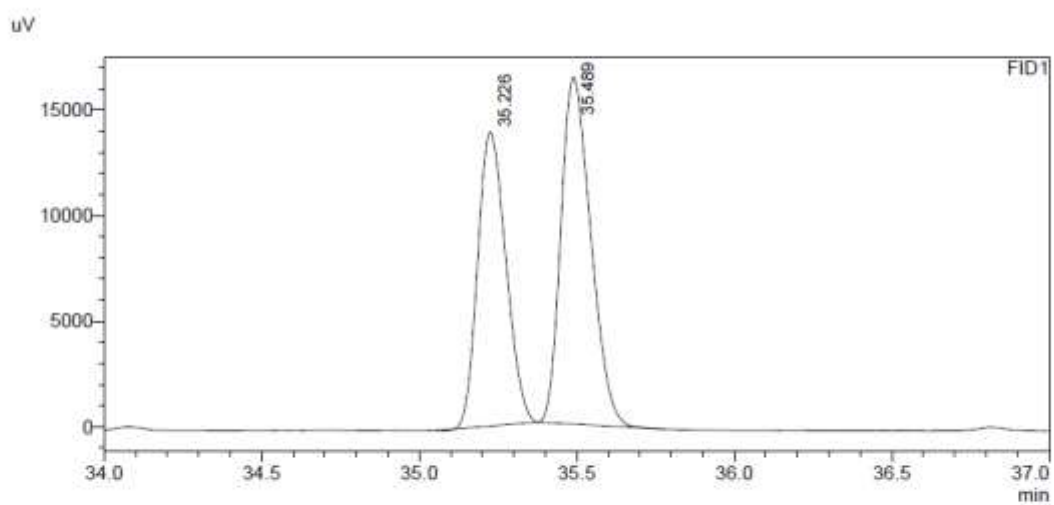

FID1

| Peak# | Ret. Time | Area   | Area%   |
|-------|-----------|--------|---------|
| 1     | 35.226    | 86597  | 44.419  |
| 2     | 35.489    | 108356 | 55.581  |
| Total |           | 194953 | 100.000 |



# I, *i*PrOH

Sample Name : t=72\_SOD-996  
Sample ID :  
Data Filename : t=72\_SOD-996.gcd  
Method Filename : Methode\_Chiral\_cyclohexyl\_aldehyde.gcm  
Batch Filename : batch\_chiral.gcb  
Vial # : 16  
Injection Volume : 1 uL  
Date Acquired : 21.02.2020 03:38:20  
Date Processed : 21.02.2020 05:09:22

uV

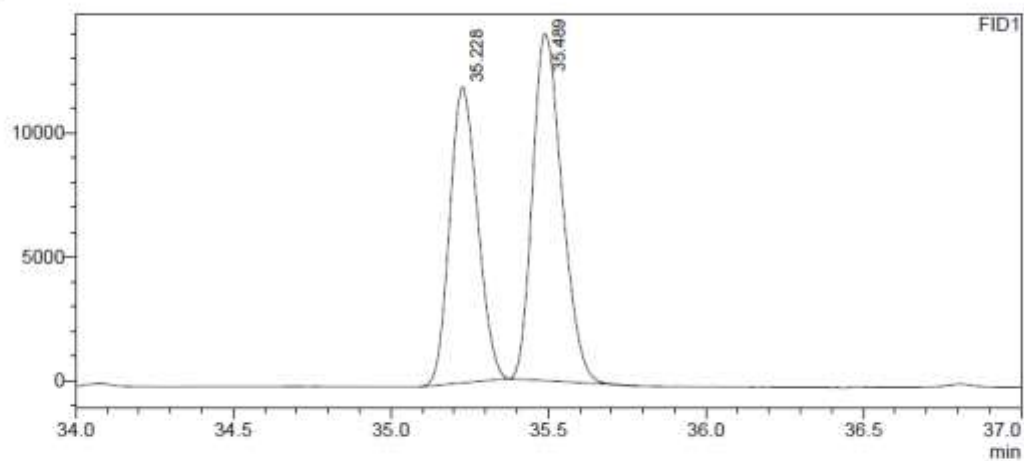

FID1

| Peak# | Ret. Time | Area   | Area%   |
|-------|-----------|--------|---------|
| 1     | 35.228    | 73324  | 44.488  |
| 2     | 35.489    | 91493  | 55.512  |
| Total |           | 164816 | 100.000 |

No I, no *i*PrOH

Sample Name : t=72\_SOD-1007  
Sample ID :  
Data Filename : t=72\_SOD-1007.gcd  
Method Filename : Methode\_Chiral\_cyclohexyl\_aldehyde.gcm  
Batch Filename : batch\_chiral.gcb  
Vial # : 27  
Injection Volume : 1 uL  
Date Acquired : 21.02.2020 21:08:00  
Date Processed : 21.02.2020 22:39:03

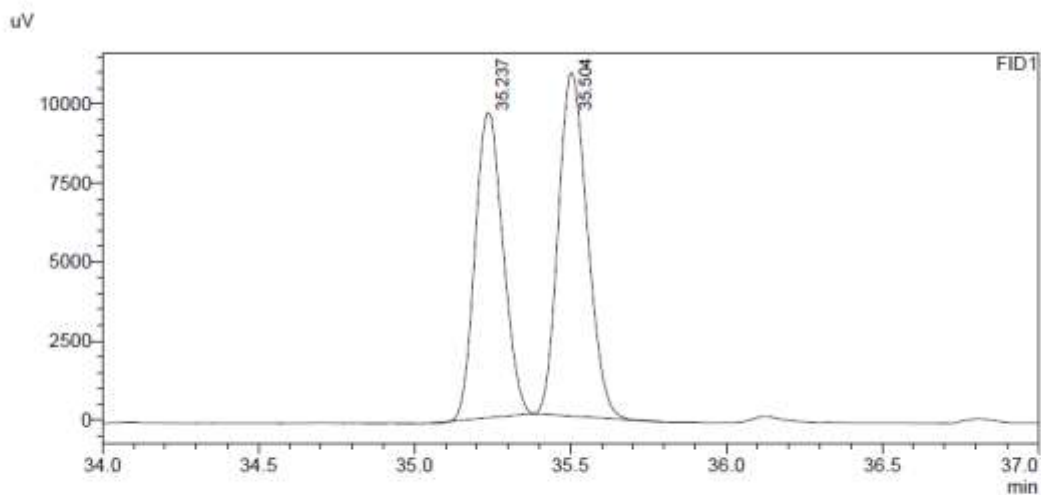

| Peak# | Ret. Time | Area   | Area%   |
|-------|-----------|--------|---------|
| 1     | 35.237    | 60164  | 46.139  |
| 2     | 35.504    | 70234  | 53.861  |
| Total |           | 130398 | 100.000 |

# Entry 8

I, no *i*PrOH

Sample Name : t=72\_SOD-984  
Sample ID :  
Data Filename : t=72\_SOD-984.gcd  
Method Filename : Methode\_Chiral\_cyclohexyl\_aldehyde.gcm  
Batch Filename : batch\_chiral.gcb  
Vial # : 4  
Injection Volume : 1 uL  
Date Acquired : 20.02.2020 08:33:14  
Date Processed : 20.02.2020 10:04:16

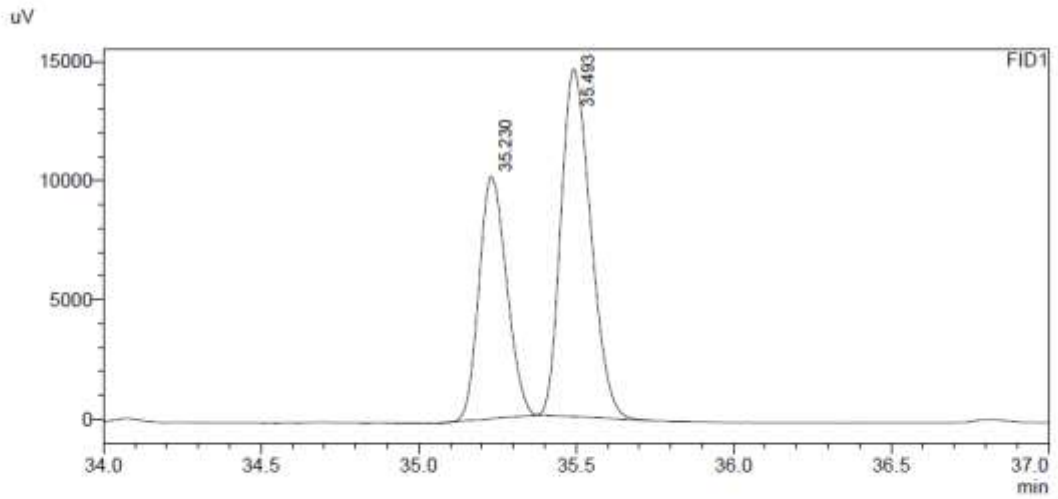

| Peak# | Ret. Time | Area   | Area%   |
|-------|-----------|--------|---------|
| 1     | 35.230    | 61883  | 39.224  |
| 2     | 35.493    | 95886  | 60.776  |
| Total |           | 157769 | 100.000 |

# I, *i*PrOH

Sample Name : t=72\_SOD-995  
Sample ID :  
Data Filename : t=72\_SOD-995.gcd  
Method Filename : Methode\_Chiral\_cyclohexyl\_aldehyde.gcm  
Batch Filename : batch\_chiral.gcb  
Vial # : 15  
Injection Volume : 1 uL  
Date Acquired : 21.02.2020 02:02:52  
Date Processed : 21.02.2020 03:33:57

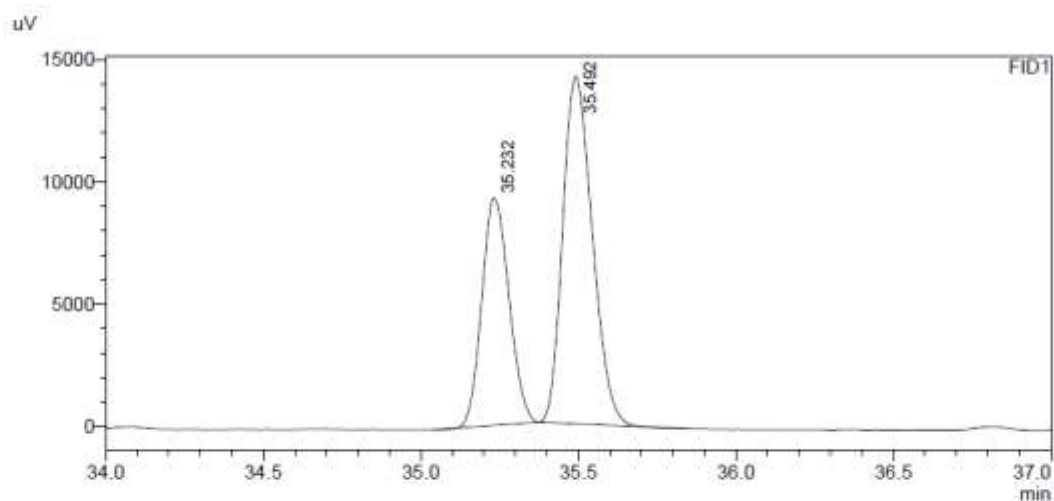

| Peak# | Ret. Time | Area   | Area%   |
|-------|-----------|--------|---------|
| 1     | 35.232    | 55841  | 37.582  |
| 2     | 35.492    | 92745  | 62.418  |
| Total |           | 148586 | 100.000 |

No I, no *i*PrOH

Sample Name : t=72\_SOD-1006  
Sample ID :  
Data Filename : t=72\_SOD-1006.gcd  
Method Filename : Methode\_Chiral\_cyclohexyl\_aldehyde.gcm  
Batch Filename : batch\_chiral.gcb  
Vial # : 26  
Injection Volume : 1 uL  
Date Acquired : 21.02.2020 19:32:34  
Date Processed : 21.02.2020 21:03:38

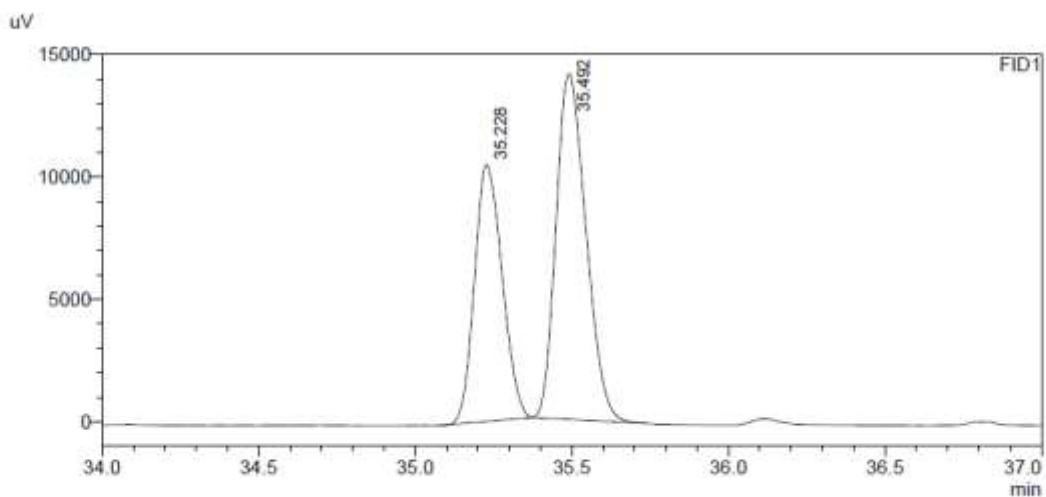

| Peak# | Ret. Time | Area   | Area%   |
|-------|-----------|--------|---------|
| 1     | 35.228    | 64469  | 40.718  |
| 2     | 35.492    | 93862  | 59.282  |
| Total |           | 158332 | 100.000 |

# Entry 9

I, no *i*PrOH

Sample Name : t=72\_SOD-983  
Sample ID :  
Data Filename : t=72\_SOD-983.gcd  
Method Filename : Methode\_Chiral\_cyclohexyl\_aldehyde.gcm  
Batch Filename : batch\_chiral.gcb  
Vial # : 3  
Injection Volume : 1 uL  
Date Acquired : 20.02.2020 06:57:48  
Date Processed : 20.02.2020 08:28:54

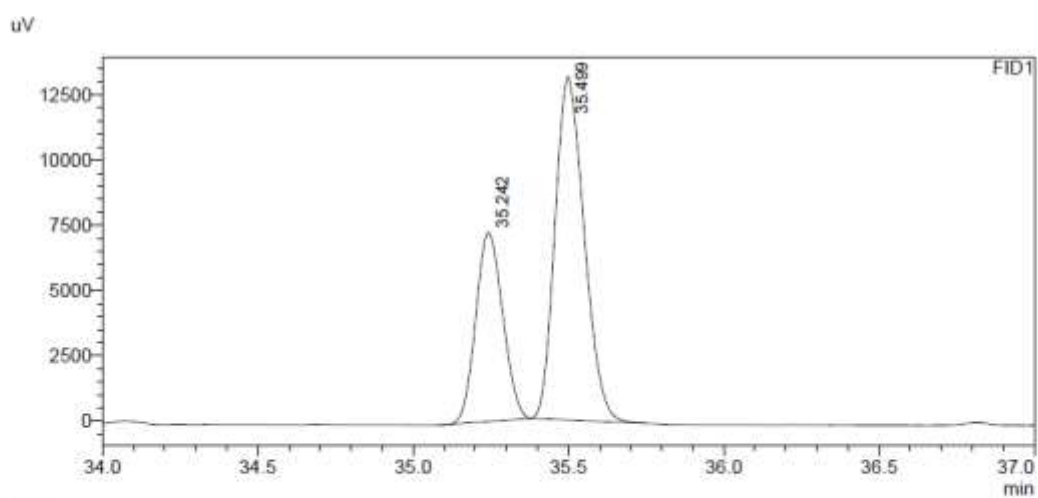

FID1

| Peak# | Ret. Time | Area   | Area%   |
|-------|-----------|--------|---------|
| 1     | 35.242    | 43607  | 33.660  |
| 2     | 35.499    | 85944  | 66.340  |
| Total |           | 129550 | 100.000 |

# I, *i*PrOH

Sample Name : t=72\_SOD-994  
Sample ID :  
Data Filename : t=72\_SOD-994.gcd  
Method Filename : Methode\_Chiral\_cyclohexyl\_aldehyde.gcm  
Batch Filename : batch\_chiral.gcb  
Vial # : 14  
Injection Volume : 1 uL  
Date Acquired : 21.02.2020 00:27:29  
Date Processed : 21.02.2020 01:58:32

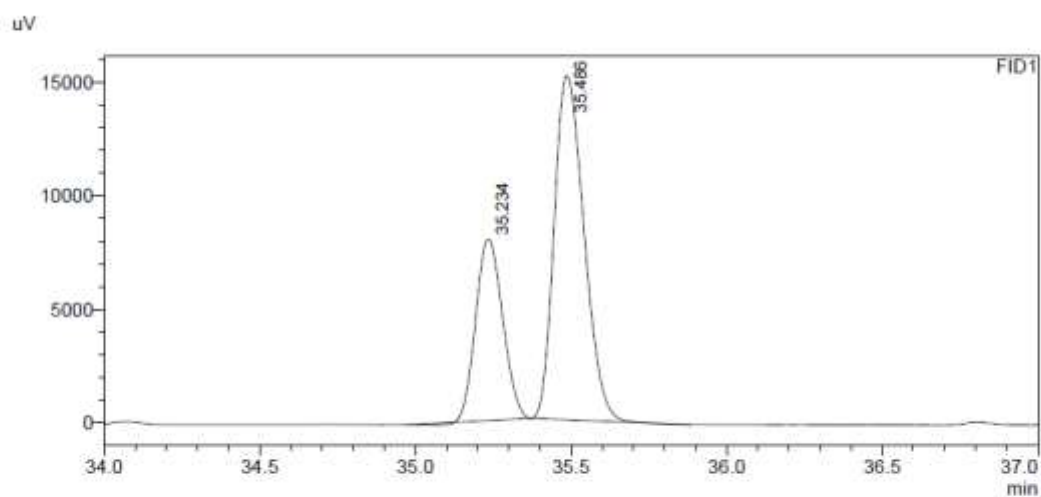

| Peak# | Ret. Time | Area   | Area%   |
|-------|-----------|--------|---------|
| 1     | 35.234    | 47764  | 32.108  |
| 2     | 35.486    | 100996 | 67.892  |
| Total |           | 148760 | 100.000 |

No I, no *i*PrOH

Sample Name : t=72\_SOD-1005  
Sample ID :  
Data Filename : t=72\_SOD-1005.gcd  
Method Filename : Methode\_Chiral\_cyclohexyl\_aldehyde.gcm  
Batch Filename : batch\_chiral.gcb  
Vial # : 25  
Injection Volume : 1 uL  
Date Acquired : 21.02.2020 17:57:11  
Date Processed : 21.02.2020 19:28:15

uV

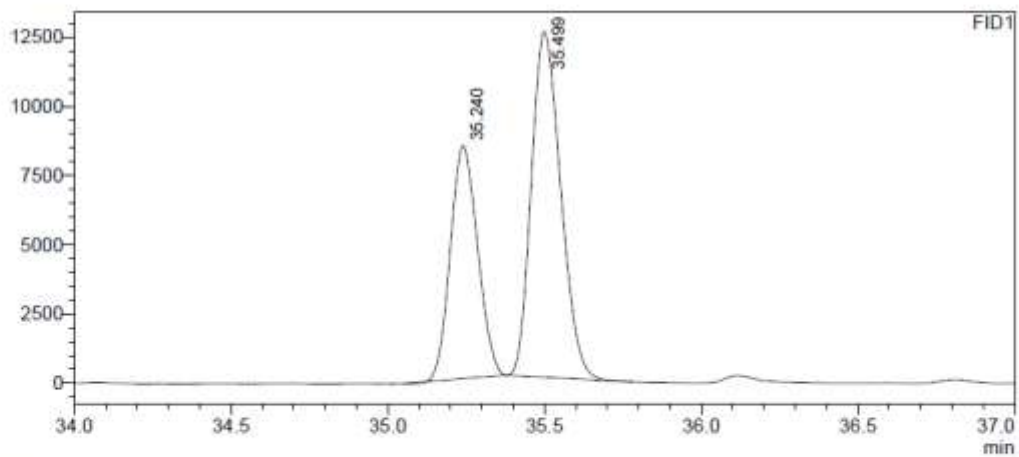

| Peak# | Ret. Time | Area   | Area%   |
|-------|-----------|--------|---------|
| 1     | 35.240    | 50706  | 38.396  |
| 2     | 35.499    | 81354  | 61.604  |
| Total |           | 132060 | 100.000 |



**Entry 10**  
**I, no *i*PrOH**

Sample Name : t=72\_SOD-982  
Sample ID :  
Data Filename : t=72\_SOD-982.gcd  
Method Filename : Methode\_Chiral\_cyclohexyl\_aldehyde.gcm  
Batch Filename : batch\_chiral.gcb  
Vial # : 2  
Injection Volume : 1 uL  
Date Acquired : 20.02.2020 05:22:24  
Date Processed : 20.02.2020 06:53:28

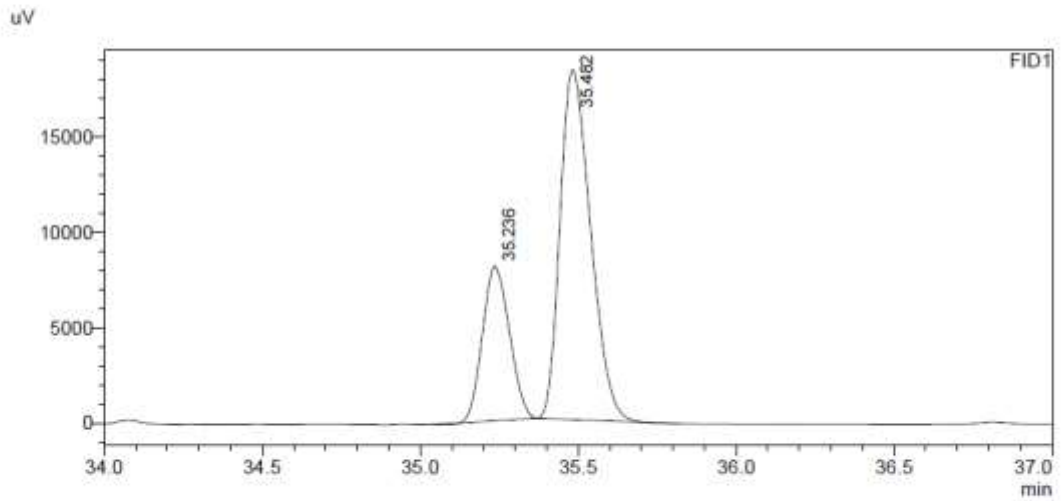

FID1

| Peak# | Ret. Time | Area   | Area%   |
|-------|-----------|--------|---------|
| 1     | 35.236    | 48047  | 28.046  |
| 2     | 35.482    | 123271 | 71.954  |
| Total |           | 171318 | 100.000 |

# I, *i*PrOH

Sample Name : t=72\_SOD-993  
Sample ID :  
Data Filename : t=72\_SOD-993.gcd  
Method Filename : Methode\_Chiral\_cyclohexyl\_aldehyde.gcm  
Batch Filename : batch\_chiral.gcb  
Vial # : 13  
Injection Volume : 1 uL  
Date Acquired : 20.02.2020 22:51:59  
Date Processed : 21.02.2020 00:23:04

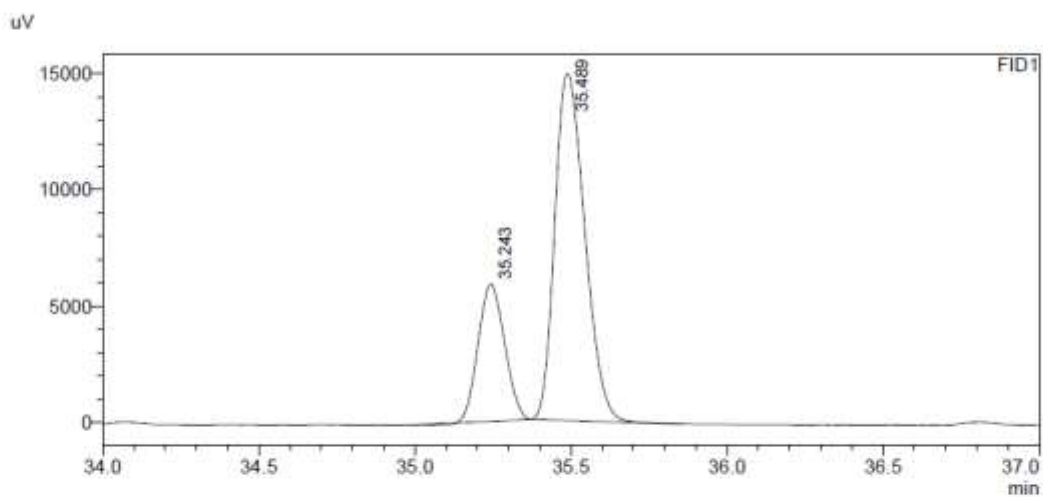

| Peak# | Ret. Time | Area   | Area%   |
|-------|-----------|--------|---------|
| 1     | 35.243    | 34766  | 25.831  |
| 2     | 35.489    | 99821  | 74.169  |
| Total |           | 134587 | 100.000 |

No I, no *i*PrOH

Sample Name : t=72\_SOD-1004  
Sample ID :  
Data Filename : t=72\_SOD-1004.gcd  
Method Filename : Methode\_Chiral\_cyclohexyl\_aldehyde.gcm  
Batch Filename : batch\_chiral.gcb  
Vial # : 24  
Injection Volume : 1 uL  
Date Acquired : 21.02.2020 16:21:46  
Date Processed : 21.02.2020 17:52:49

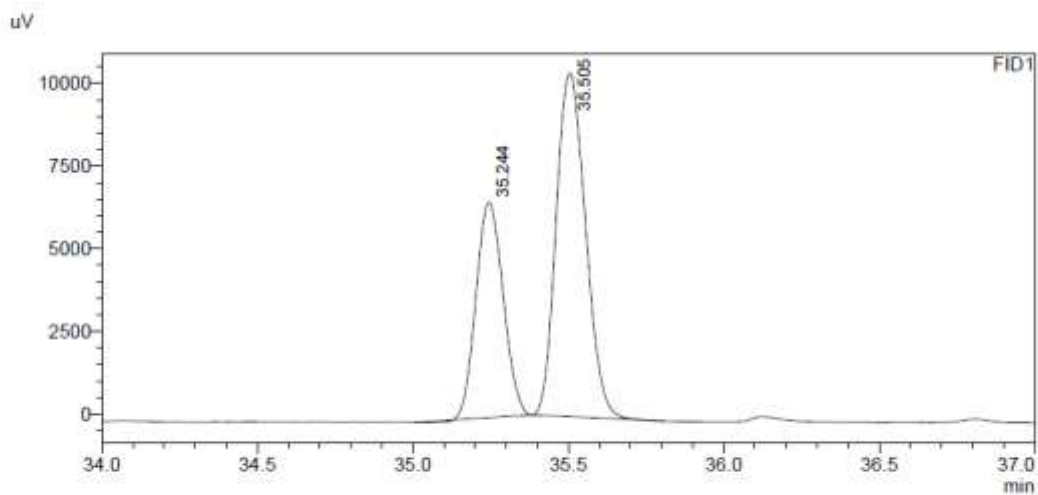

FID1

| Peak# | Ret. Time | Area   | Area%   |
|-------|-----------|--------|---------|
| 1     | 35.244    | 39454  | 36.623  |
| 2     | 35.505    | 68275  | 63.377  |
| Total |           | 107729 | 100.000 |

**Entry 11**  
**I, no *i*PrOH**

Sample Name : t=72\_SOD-981  
Sample ID :  
Data Filename : t=72\_SOD-981.gcd  
Method Filename : Methode\_Chiral\_cyclohexyl\_aldehyde.gcm  
Batch Filename : batch\_chiral.gcb  
Vial # : 1  
Injection Volume : 1 uL  
Date Acquired : 20.02.2020 03:46:59  
Date Processed : 20.02.2020 05:18:05

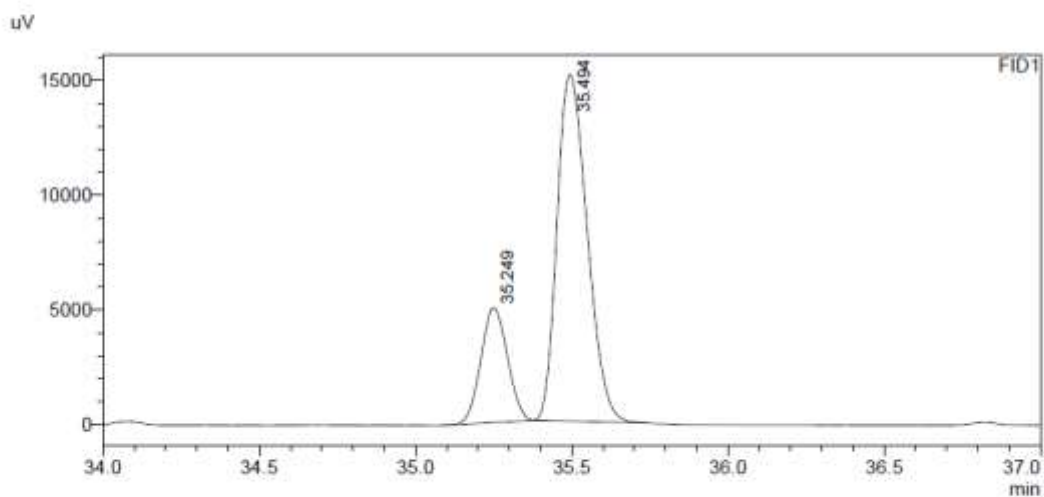

| Peak# | Ret. Time | Area   | Area%   |
|-------|-----------|--------|---------|
| 1     | 35.249    | 29584  | 22.608  |
| 2     | 35.494    | 101273 | 77.392  |
| Total |           | 130856 | 100.000 |

# I, *i*PrOH

Sample Name : t=72\_SOD-992  
Sample ID :  
Data Filename : t=72\_SOD-992.gcd  
Method Filename : Methode\_Chiral\_cyclohexyl\_aldehyde.gcm  
Batch Filename : batch\_chiral.gcb  
Vial # : 12  
Injection Volume : 1 uL  
Date Acquired : 20.02.2020 21:16:34  
Date Processed : 20.02.2020 22:47:39

uV

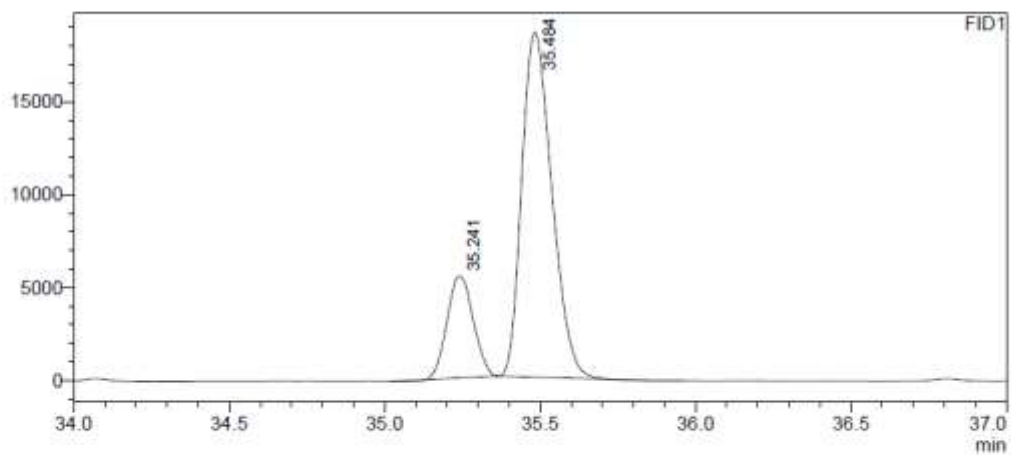

FID1

| Peak# | Ret. Time | Area   | Area%   |
|-------|-----------|--------|---------|
| 1     | 35.241    | 32030  | 20.399  |
| 2     | 35.484    | 124989 | 79.601  |
| Total |           | 157020 | 100.000 |

No I, no *i*PrOH

Sample Name : t=72\_SOD-1003  
Sample ID :  
Data Filename : t=72\_SOD-1003.gcd  
Method Filename : Methode\_Chiral\_cyclohexyl\_aldehyde.gcm  
Batch Filename : batch\_chiral.gcb  
Vial # : 23  
Injection Volume : 1 uL  
Date Acquired : 21.02.2020 14:46:17  
Date Processed : 21.02.2020 16:17:22

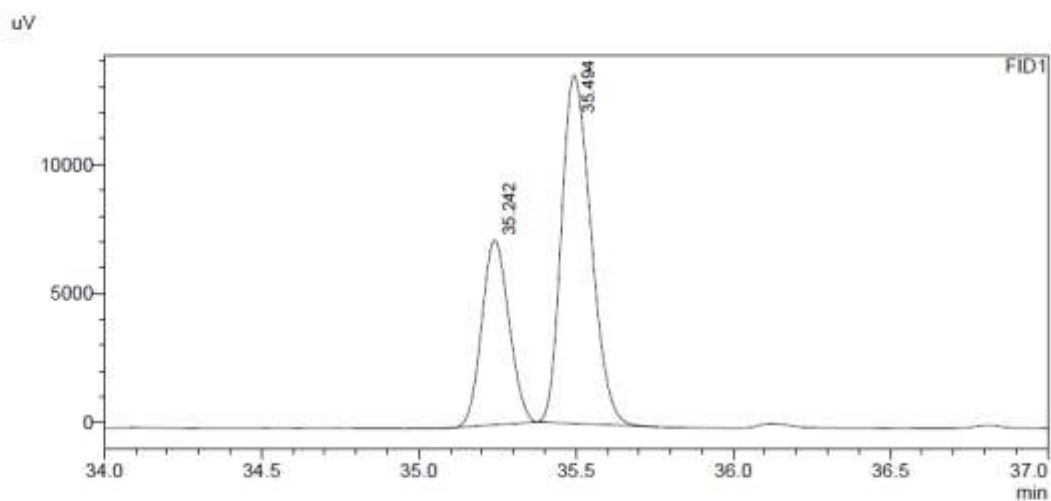

| Peak# | Ret. Time | Area   | Area%   |
|-------|-----------|--------|---------|
| 1     | 35.242    | 43113  | 32.830  |
| 2     | 35.494    | 88208  | 67.170  |
| Total |           | 131321 | 100.000 |

## 2.7 Chiral GC spectra of Fig. 4 of the manuscript (initial conversions/*ees*)

I, *i*PrOH

t = 15 min

Sample Name : t=0.25\_SOD\_785\_2  
Sample ID :  
Data Filename : t=0.25\_SOD\_785\_gcd  
Method Filename : Methode\_Chiral\_MUC\_2.gcm  
Batch Filename : batch\_chiral.gcb  
Vial # : 4  
Injection Volume : 1 uL  
Date Acquired : 02.07.2019 21:09:30  
Date Processed : 02.07.2019 22:04:05

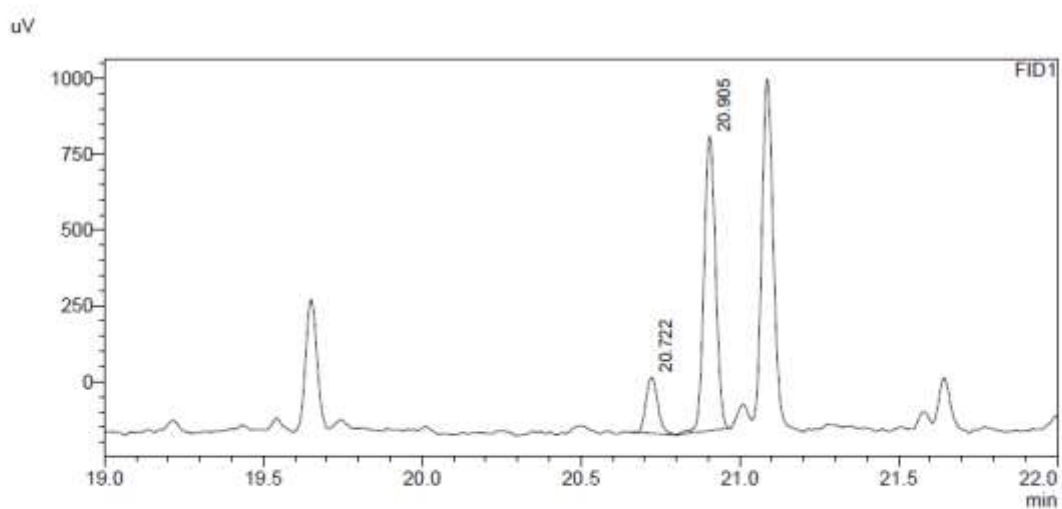

| Peak# | Ret. Time | Area | Area%   |
|-------|-----------|------|---------|
| 1     | 20.722    | 478  | 16.255  |
| 2     | 20.905    | 2463 | 83.745  |
| Total |           | 2941 | 100.000 |

t = 30 min

Sample Name : t=0.5\_SOD\_785  
Sample ID :  
Data Filename : t=0.5\_SOD\_785.gcd  
Method Filename : Methode\_Chiral\_MUC\_2.gcm  
Batch Filename : batch\_chiral.gcb  
Vial # : 8  
Injection Volume : 1 uL  
Date Acquired : 02.07.2019 21:57:21  
Date Processed : 03.07.2019 10:22:59

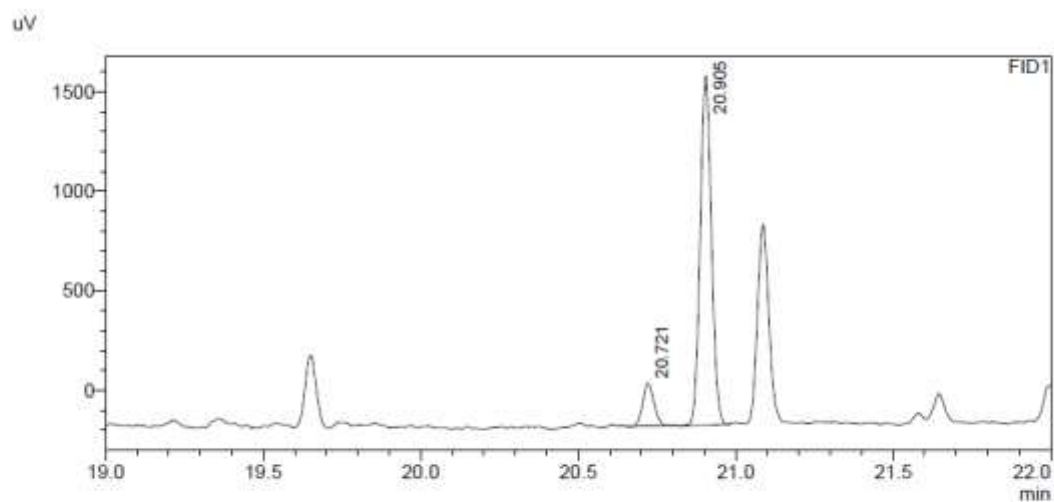

| Peak# | Ret. Time | Area | Area%   |
|-------|-----------|------|---------|
| 1     | 20.721    | 528  | 10.825  |
| 2     | 20.905    | 4351 | 89.175  |
| Total |           | 4880 | 100.000 |



t = 45 min

Sample Name : t=0.75\_SOD\_785  
Sample ID :  
Data Filename : t=0.75\_SOD\_785.gcd  
Method Filename : Methode\_Chiral\_MUC\_2.gcm  
Batch Filename : batch\_chiral.gcb  
Vial # : 12  
Injection Volume : 1 uL  
Date Acquired : 03.07.2019 01:08:33  
Date Processed : 03.07.2019 10:28:26

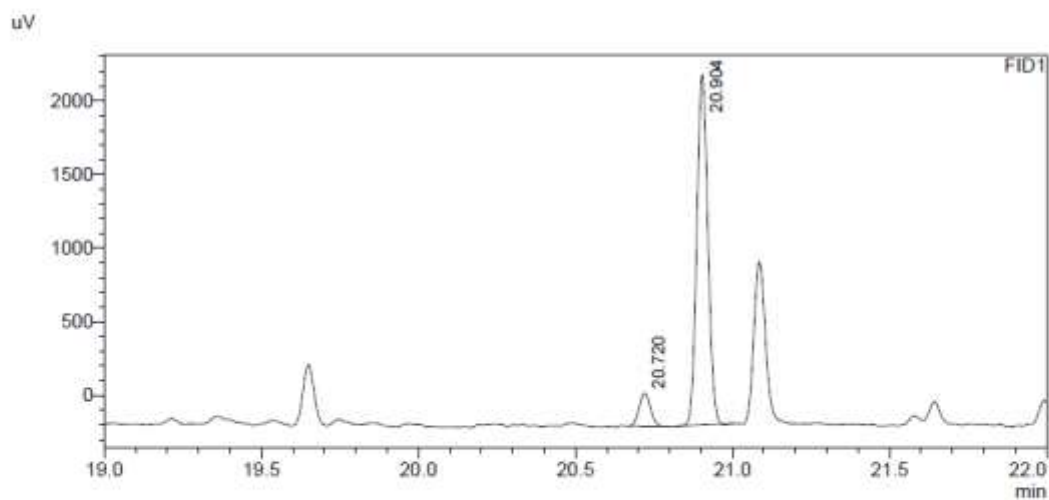

FID1

| Peak# | Ret. Time | Area | Area%   |
|-------|-----------|------|---------|
| 1     | 20.720    | 558  | 8.740   |
| 2     | 20.904    | 5831 | 91.260  |
| Total |           | 6389 | 100.000 |

t = 1 h

Sample Name : t=1\_SOD\_785  
Sample ID :  
Data Filename : t=1\_SOD\_785.gcd  
Method Filename : Methode\_Chiral\_MUC\_2.gcm  
Batch Filename : batch\_chiral.gcb  
Vial # : 16  
Injection Volume : 1 uL  
Date Acquired : 03.07.2019 04:19:43  
Date Processed : 03.07.2019 10:30:29

uV

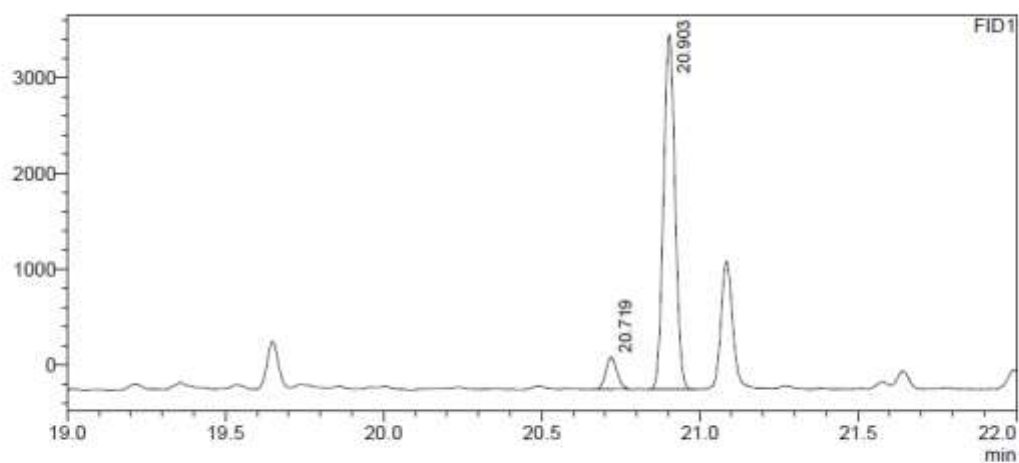

FID1

| Peak# | Ret. Time | Area  | Area%   |
|-------|-----------|-------|---------|
| 1     | 20.719    | 809   | 7.950   |
| 2     | 20.903    | 9369  | 92.050  |
| Total |           | 10178 | 100.000 |

t = 1.5 h

Sample Name : t=1.5\_SOD\_785  
Sample ID :  
Data Filename : t=1.5\_SOD\_785.gcd  
Method Filename : Methode\_Chiral\_MUC\_2.gcm  
Batch Filename : batch\_chiral.gcb  
Vial # : 20  
Injection Volume : 1 uL  
Date Acquired : 03.07.2019 07:30:57  
Date Processed : 03.07.2019 10:34:02

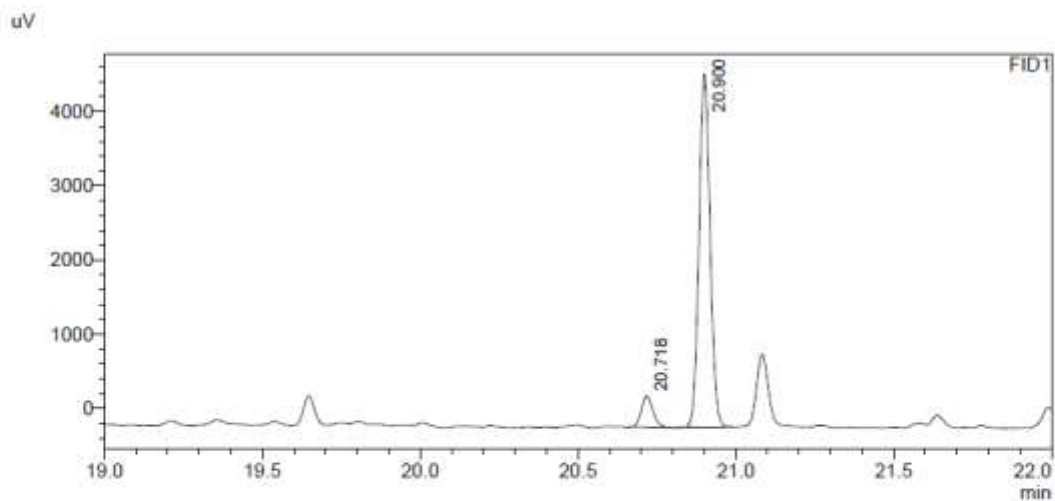

| Peak# | Ret. Time | Area  | Area%   |
|-------|-----------|-------|---------|
| 1     | 20.718    | 1051  | 8.306   |
| 2     | 20.900    | 11606 | 91.694  |
| Total |           | 12658 | 100.000 |

t = 2 h

Sample Name : t=2\_SOD\_785  
Sample ID :  
Data Filename : t=2\_SOD\_785.gcd  
Method Filename : Methode\_Chiral\_MUC\_2.gcm  
Batch Filename : batch\_chiral.gcb  
Vial # : 24  
Injection Volume : 1 uL  
Date Acquired : 03.07.2019 10:42:17  
Date Processed : 03.07.2019 11:25:21

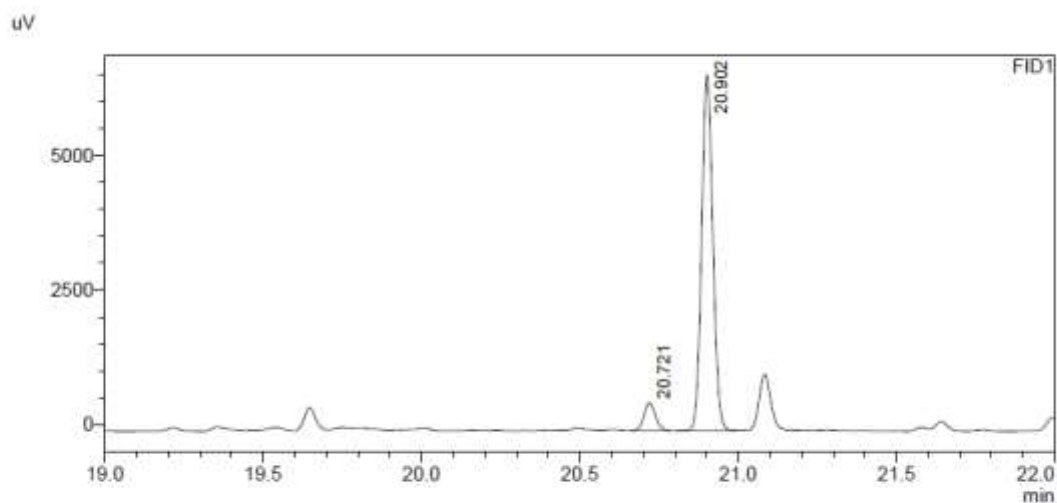

| Peak# | Ret. Time | Area  | Area%   |
|-------|-----------|-------|---------|
| 1     | 20.721    | 1259  | 7.170   |
| 2     | 20.902    | 16296 | 92.830  |
| Total |           | 17555 | 100.000 |

t = 2.5 h

Sample Name : t=2.5\_SOD\_785  
Sample ID :  
Data Filename : t=2.5\_SOD\_785.gcd  
Method Filename : Methode\_Chiral\_MUC\_2.gcm  
Batch Filename : batch\_chiral.gcb  
Vial # : 28  
Injection Volume : 1 uL  
Date Acquired : 03.07.2019 13:53:31  
Date Processed : 03.07.2019 15:49:18

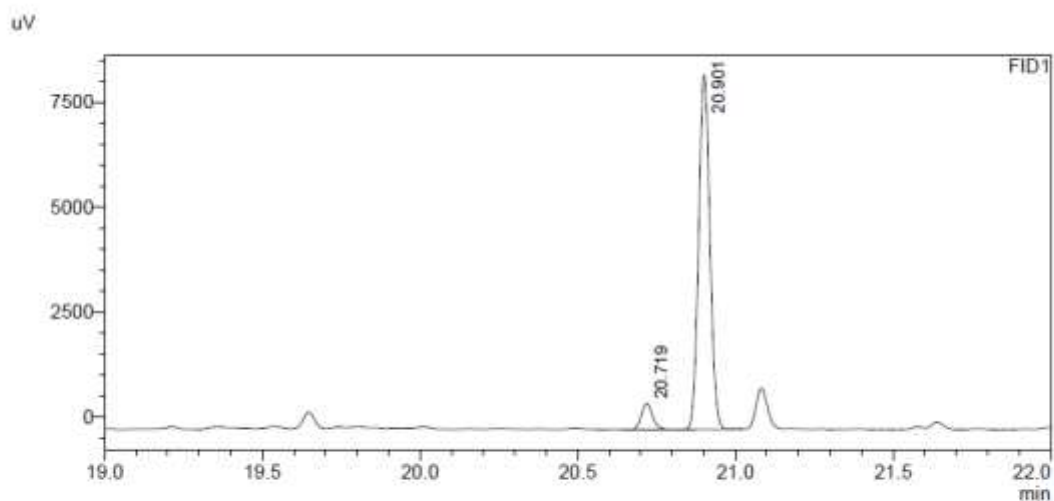

| Peak# | Ret. Time | Area  | Area%   |
|-------|-----------|-------|---------|
| 1     | 20.719    | 1527  | 6.812   |
| 2     | 20.901    | 20889 | 93.188  |
| Total |           | 22416 | 100.000 |

t = 3 h

Sample Name : t=3\_SOD\_785  
Sample ID :  
Data Filename : t=3\_SOD\_785.gcd  
Method Filename : Methode\_Chiral\_MUC\_2.gcm  
Batch Filename : batch\_chiral.gcb  
Vial # : 32  
Injection Volume : 1 uL  
Date Acquired : 03.07.2019 17:04:53  
Date Processed : 04.07.2019 07:11:57

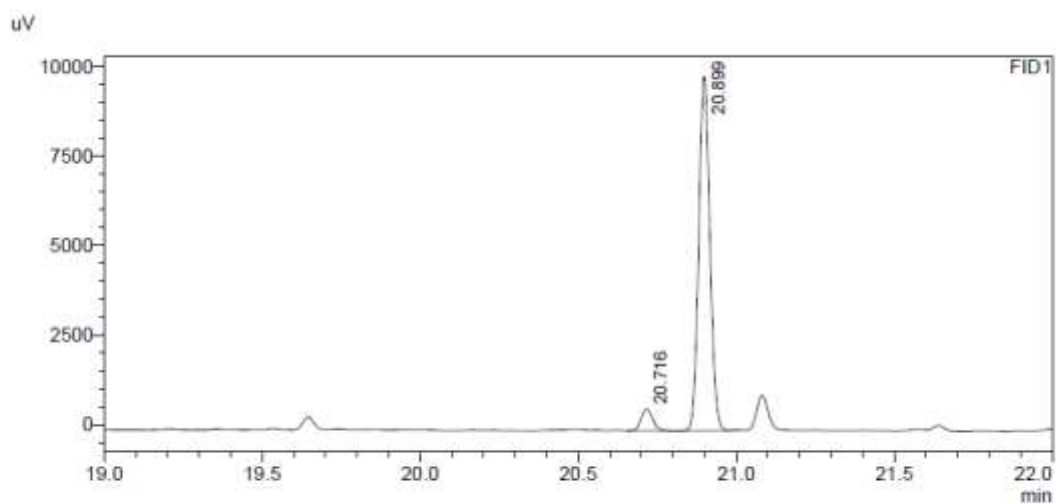

FID1

| Peak# | Ret. Time | Area  | Area%   |
|-------|-----------|-------|---------|
| 1     | 20.716    | 1525  | 5.911   |
| 2     | 20.899    | 24280 | 94.089  |
| Total |           | 25806 | 100.000 |

t = 3.5 h

Sample Name : t=3.5\_SOD\_785  
Sample ID :  
Data Filename : t=3.5\_SOD\_785.gcd  
Method Filename : Methode\_Chiral\_MUC\_2.gcm  
Batch Filename : batch\_chiral.gcb  
Vial # : 36  
Injection Volume : 1 uL  
Date Acquired : 03.07.2019 20:16:17  
Date Processed : 04.07.2019 07:13:18

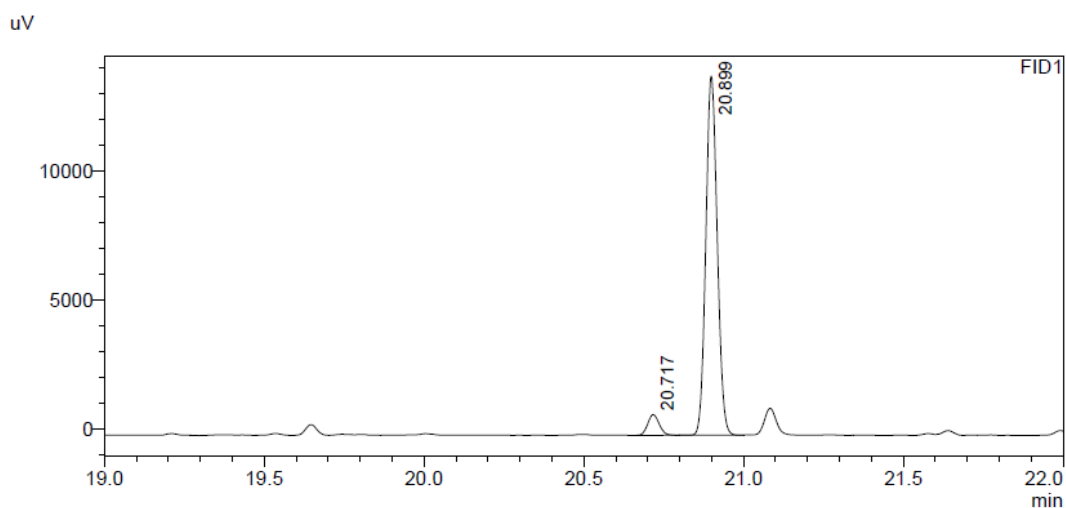

FID1

| Peak# | Ret. Time | Area  | Area%   |
|-------|-----------|-------|---------|
| 1     | 20.717    | 2005  | 5.482   |
| 2     | 20.899    | 34569 | 94.518  |
| Total |           | 36574 | 100.000 |

t = 4 h

Sample Name : t=4\_SOD\_785  
Sample ID :  
Data Filename : t=4\_SOD\_785.gcd  
Method Filename : Methode\_Chiral\_MUC\_2.gcm  
Batch Filename : batch\_chiral.gcb  
Vial # : 40  
Injection Volume : 1 uL  
Date Acquired : 03.07.2019 23:27:37  
Date Processed : 04.07.2019 07:14:36

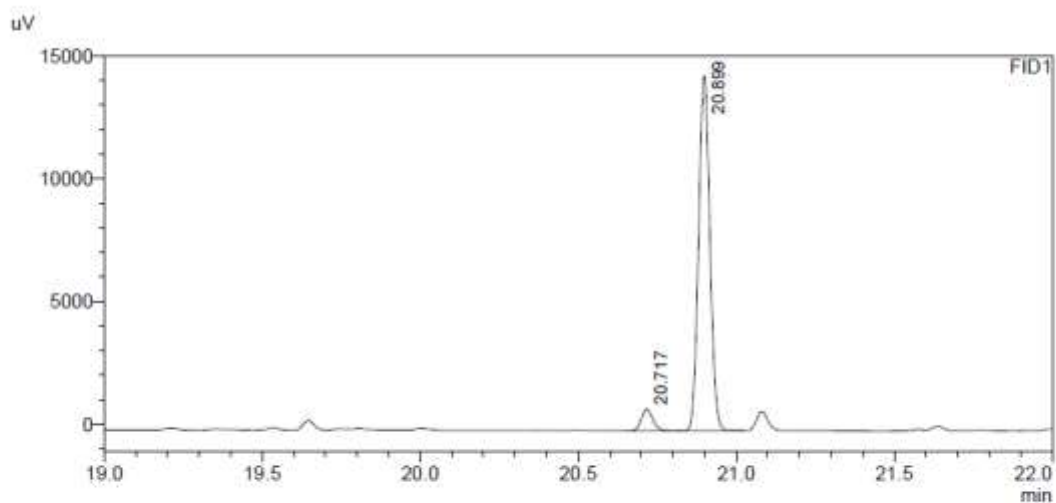

| Peak# | Ret. Time | Area  | Area%   |
|-------|-----------|-------|---------|
| 1     | 20.717    | 2199  | 5.789   |
| 2     | 20.899    | 35780 | 94.211  |
| Total |           | 37979 | 100.000 |



t = 5 h

Sample Name : t=5\_SOD\_785  
Sample ID :  
Data Filename : t=5\_SOD\_785.gcd  
Method Filename : Methode\_Chiral\_MUC\_2.gcm  
Batch Filename : batch\_chiral.gcb  
Vial # : 44  
Injection Volume : 1 uL  
Date Acquired : 04.07.2019 02:38:48  
Date Processed : 04.07.2019 07:15:55

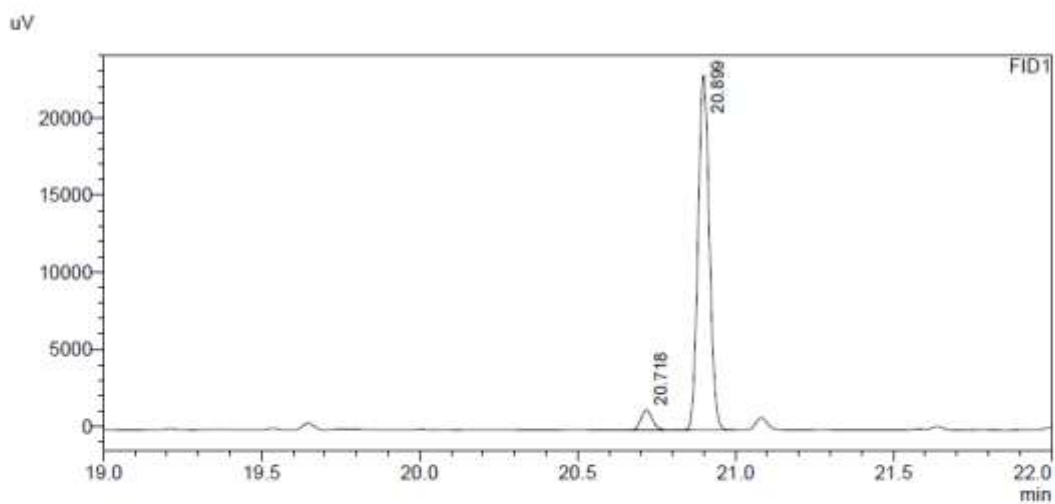

| Peak# | Ret. Time | Area  | Area%   |
|-------|-----------|-------|---------|
| 1     | 20.718    | 3315  | 5.472   |
| 2     | 20.899    | 57268 | 94.528  |
| Total |           | 60583 | 100.000 |

t = 6 h

Sample Name : t=6\_SOD\_785  
Sample ID :  
Data Filename : t=6\_SOD\_785.gcd  
Method Filename : Methode\_Chiral\_MUC\_2.gcm  
Batch Filename : batch\_chiral.gcb  
Vial # : 48  
Injection Volume : 1 uL  
Date Acquired : 04.07.2019 05:49:57  
Date Processed : 04.07.2019 09:02:47

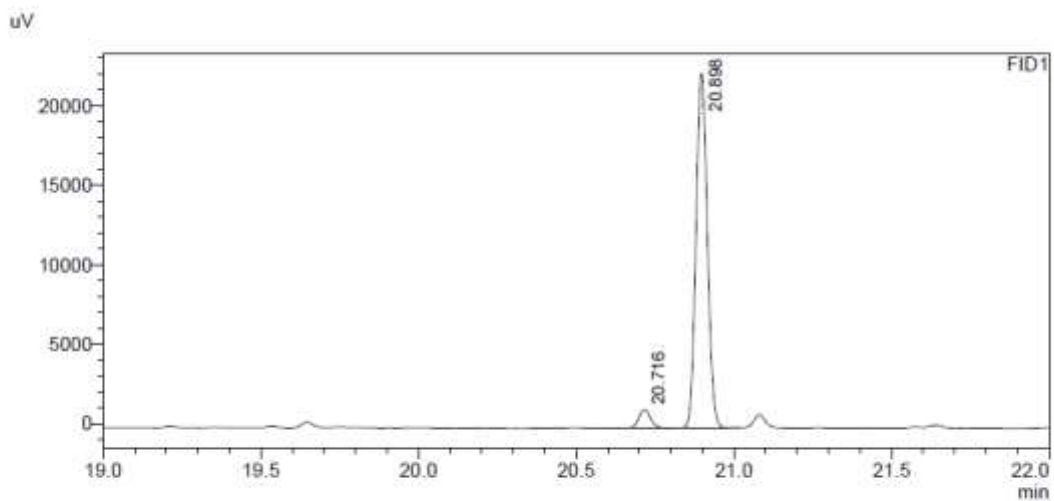

FID1

| Peak# | Ret. Time | Area  | Area%   |
|-------|-----------|-------|---------|
| 1     | 20.716    | 2974  | 5.062   |
| 2     | 20.898    | 55773 | 94.938  |
| Total |           | 58747 | 100.000 |

t = 7 h

Sample Name : t=7\_SOD\_785  
Sample ID :  
Data Filename : t=7\_SOD\_785.gcd  
Method Filename : Methode\_Chiral\_MUC\_2.gcm  
Batch Filename : batch\_chiral.gcb  
Vial # : 52  
Injection Volume : 1 ul  
Date Acquired : 04.07.2019 09:00:39  
Date Processed : 22.07.2019 13:51:09

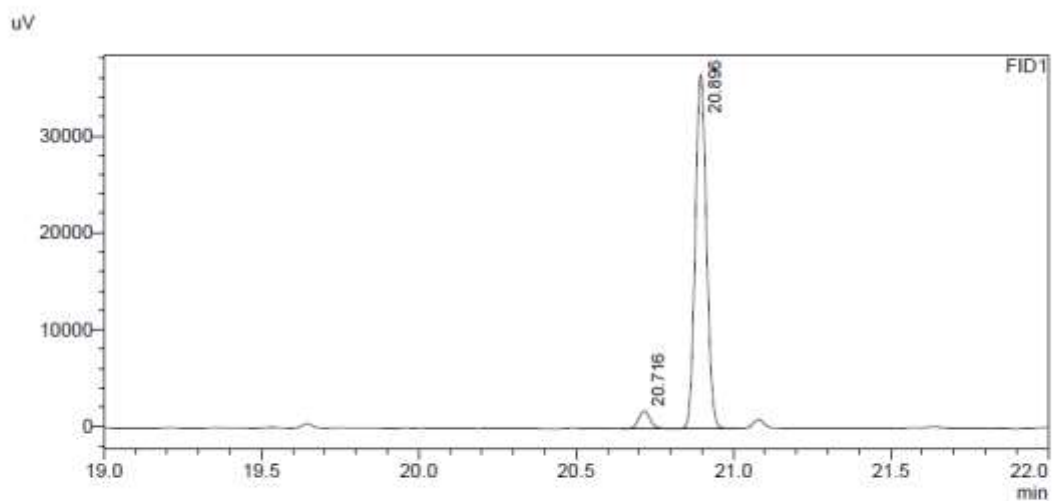

| Peak# | Ret. Time | Area  | Area%   |
|-------|-----------|-------|---------|
| 1     | 20.716    | 4665  | 4.902   |
| 2     | 20.896    | 90496 | 95.098  |
| Total |           | 95160 | 100.000 |

t = 8 h

Sample Name : t=8\_SOD\_785  
Sample ID :  
Data Filename : t=8\_SOD\_785.gcd  
Method Filename : Methode\_Chiral\_MUC\_2.gcm  
Batch Filename : batch\_chiral.gcb  
Vial # : 56  
Injection Volume : 1 uL  
Date Acquired : 04.07.2019 12:11:52  
Date Processed : 22.07.2019 13:48:36

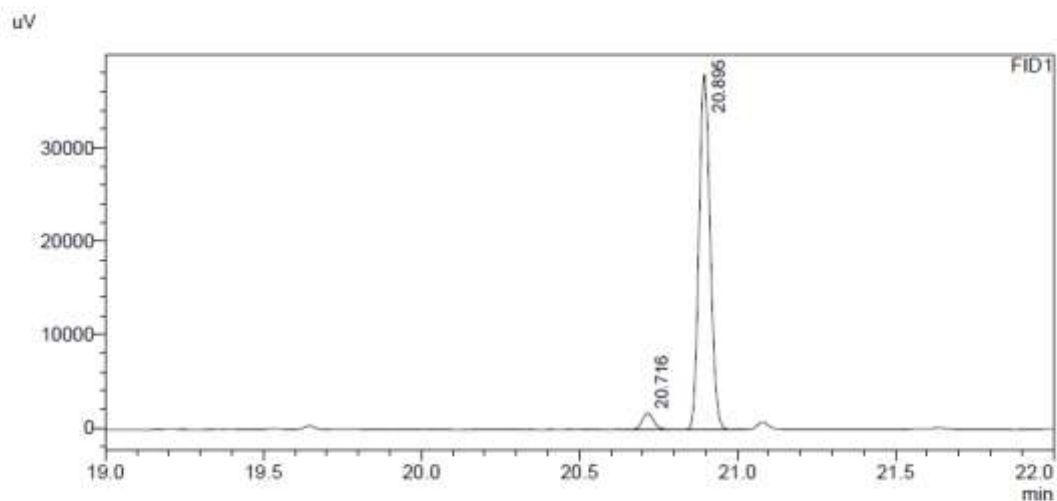

| Peak# | Ret. Time | Area  | Area%   |
|-------|-----------|-------|---------|
| 1     | 20.716    | 4509  | 4.597   |
| 2     | 20.895    | 93576 | 95.403  |
| Total |           | 98085 | 100.000 |

t = 9 h

Sample Name : t=9\_SOD\_785  
Sample ID :  
Data Filename : t=9\_SOD\_785.gcd  
Method Filename : Methode\_Chiral\_MUC\_2.gcm  
Batch Filename : batch\_chiral.gcb  
Vial # : 60  
Injection Volume : 1 uL  
Date Acquired : 04.07.2019 15:23:17  
Date Processed : 22.07.2019 13:50:49

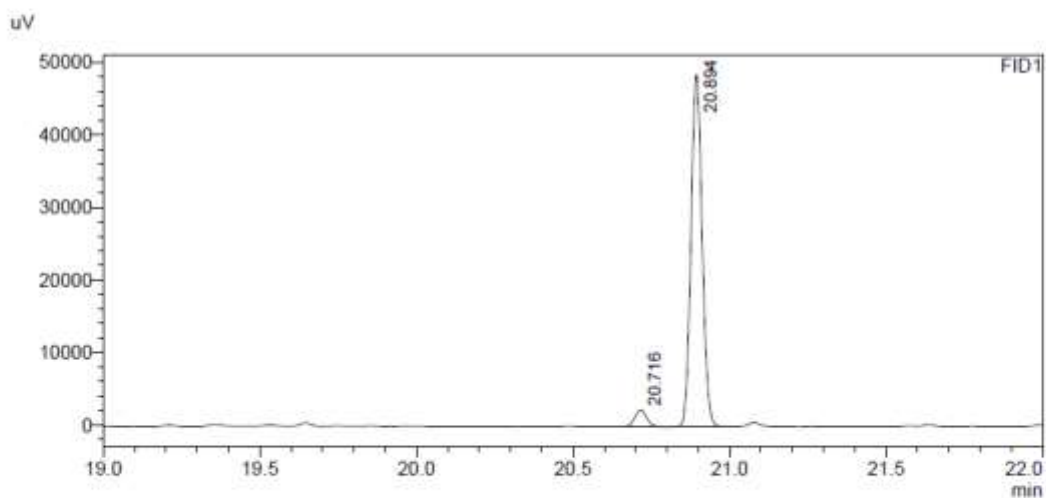

FID1

| Peak# | Ret. Time | Area   | Area%   |
|-------|-----------|--------|---------|
| 1     | 20.716    | 5975   | 4.773   |
| 2     | 20.894    | 119213 | 95.227  |
| Total |           | 125187 | 100.000 |

t = 10 h

Sample Name : t=10\_SOD\_785  
Sample ID :  
Data Filename : t=10\_SOD\_785.gcd  
Method Filename : Methode\_Chiral\_MUC\_2.gcm  
Batch Filename : batch\_chiral.gcb  
Vial # : 64  
Injection Volume : 1 uL  
Date Acquired : 04.07.2019 18:34:31  
Date Processed : 22.07.2019 13:53:29

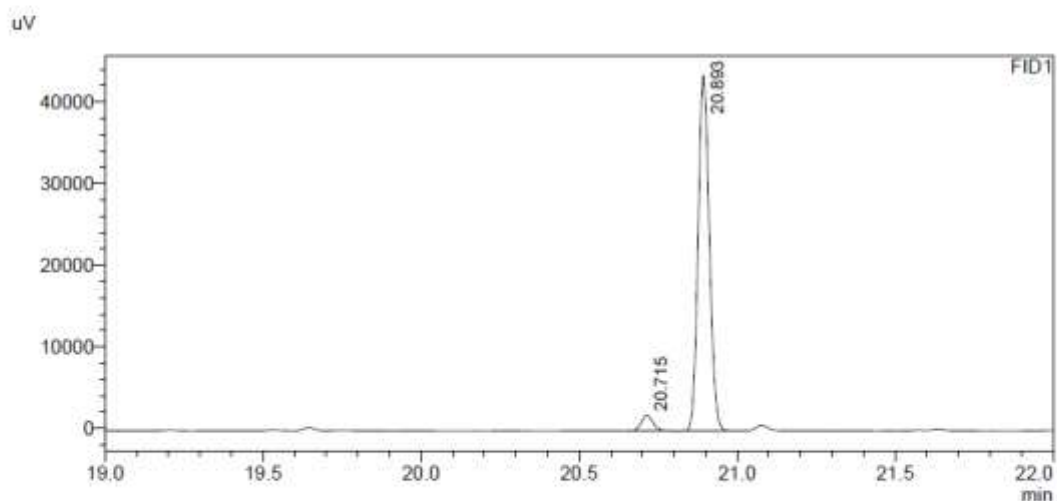

| Peak# | Ret. Time | Area   | Area%   |
|-------|-----------|--------|---------|
| 1     | 20.715    | 4851   | 4.319   |
| 2     | 20.893    | 107472 | 95.681  |
| Total |           | 112323 | 100.000 |

t = 11 h

Sample Name : t=11\_SOD\_785  
Sample ID :  
Data Filename : t=11\_SOD\_785.gcd  
Method Filename : Methode\_Chiral\_MUC\_2.gcm  
Batch Filename : batch\_chiral.gcb  
Vial # : 68  
Injection Volume : 1 uL  
Date Acquired : 04.07.2019 21:45:47  
Date Processed : 24.07.2019 16:44:40

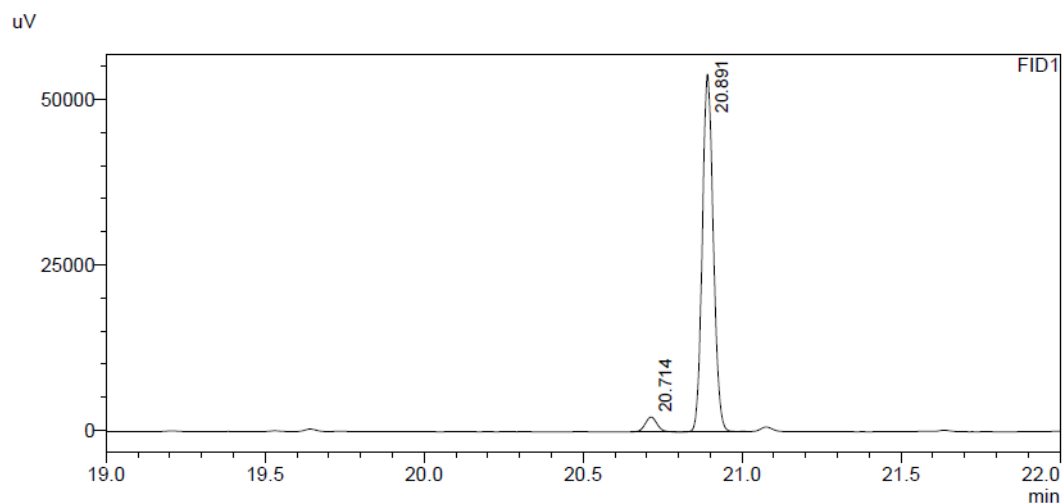

| Peak# | Ret. Time | Area   | Area%   |
|-------|-----------|--------|---------|
| 1     | 20.714    | 5686   | 4.189   |
| 2     | 20.891    | 130064 | 95.811  |
| Total |           | 135751 | 100.000 |

t = 24 h

Sample Name : t=24\_SOD\_785  
Sample ID :  
Data Filename : t=24\_SOD\_785.gcd  
Method Filename : Methode\_Chiral\_MUC\_2.gcm  
Batch Filename : batch\_chiral.gcb  
Vial # : 6  
Injection Volume : 1 uL  
Date Acquired : 22.07.2019 21:27:36  
Date Processed : 29.07.2019 15:54:25

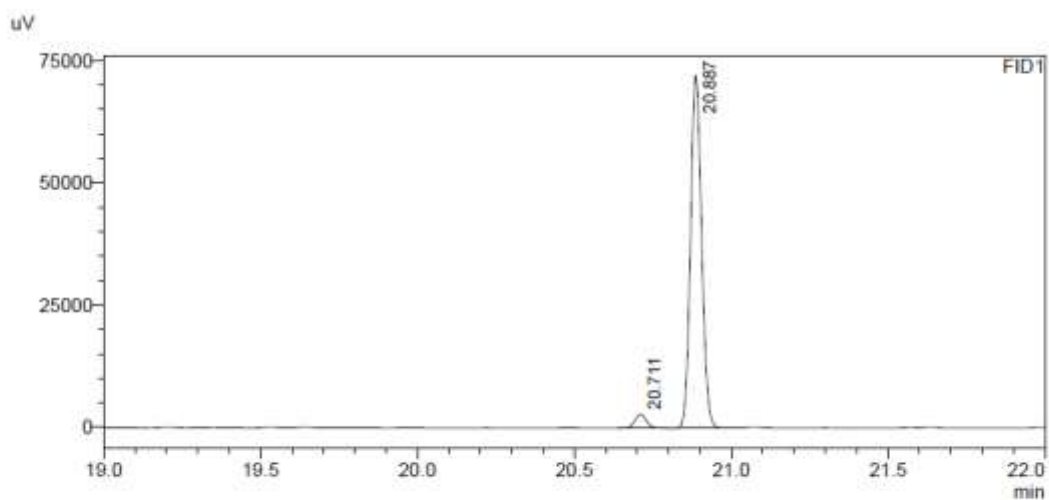

| Peak# | Ret. Time | Area   | Area%   |
|-------|-----------|--------|---------|
| 1     | 20.711    | 6994   | 3.802   |
| 2     | 20.887    | 176975 | 96.198  |
| Total |           | 183970 | 100.000 |



t = 48 h

Sample Name : t=48\_SOD\_785  
Sample ID :  
Data Filename : t=48\_SOD\_785.gcd  
Method Filename : Methode\_Chiral\_MUC\_2.gcm  
Batch Filename : batch\_chiral.gcb  
Vial # : 10  
Injection Volume : 1 uL  
Date Acquired : 23.07.2019 00:38:45  
Date Processed : 29.07.2019 15:59:01

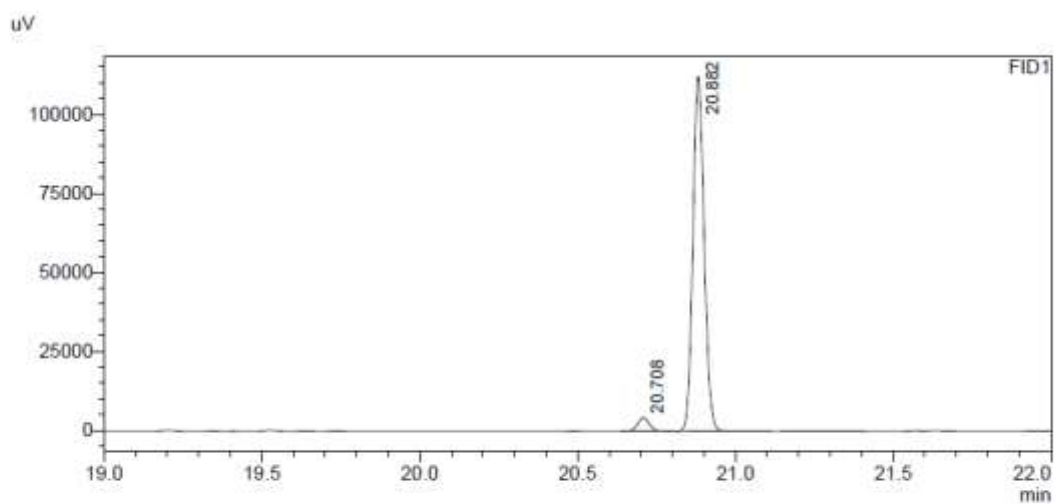

FID1

| Peak# | Ret. Time | Area   | Area%   |
|-------|-----------|--------|---------|
| 1     | 20.708    | 10449  | 3.640   |
| 2     | 20.882    | 276598 | 96.360  |
| Total |           | 287047 | 100.000 |

t = 72 h

Sample Name : t=72\_SOD\_785  
Sample ID :  
Data Filename : t=72\_SOD\_785.gcd  
Method Filename : Methode\_Chiral\_MUC\_2.gcm  
Batch Filename : batch\_chiral.gcb  
Vial # : 14  
Injection Volume : 1 uL  
Date Acquired : 23.07.2019 03:49:56  
Date Processed : 29.07.2019 16:04:00

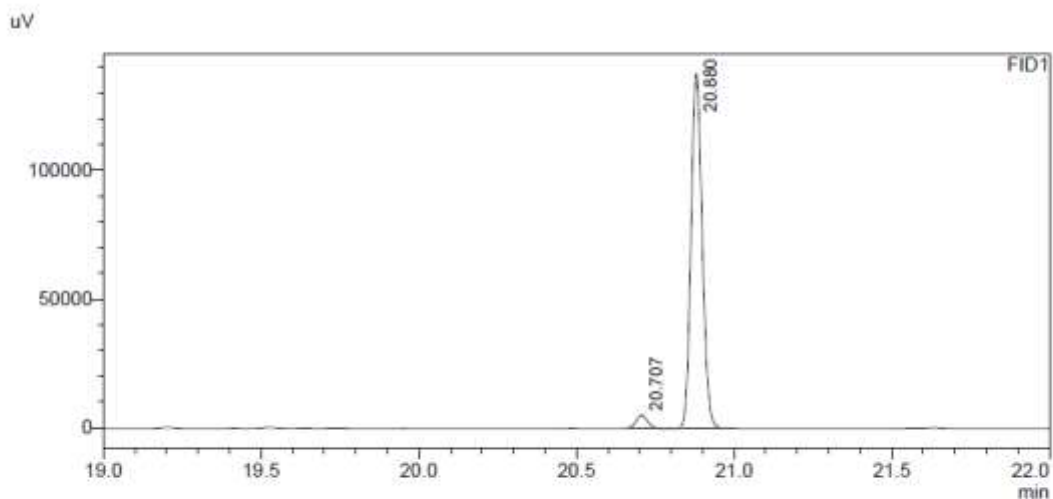

| Peak# | Ret. Time | Area   | Area%   |
|-------|-----------|--------|---------|
| 1     | 20.707    | 12390  | 3.529   |
| 2     | 20.880    | 338672 | 96.471  |
| Total |           | 351062 | 100.000 |

I, no *i*PrOH

t = 15 min

Sample Name : t=0,25\_SOD\_786  
Sample ID :  
Data Filename : t=0,25\_SOD\_786.gcd  
Method Filename : Methode\_Chiral\_MUC\_2.gcm  
Batch Filename : batch\_chiral.gcb  
Vial # : 35  
Injection Volume : 1 uL  
Date Acquired : 23.07.2019 20:34:03  
Date Processed : 29.07.2019 14:05:02

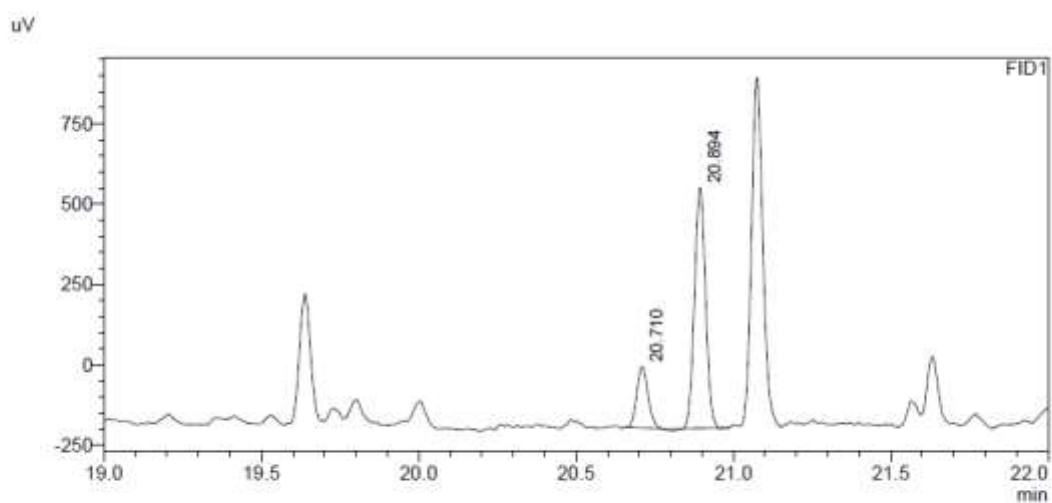

| Peak# | Ret. Time | Area | Area%   |
|-------|-----------|------|---------|
| 1     | 20.710    | 470  | 20.618  |
| 2     | 20.894    | 1810 | 79.382  |
| Total |           | 2280 | 100.000 |

t = 30 min

Sample Name : t=0,5\_SOD\_786  
Sample ID :  
Data Filename : t=0,5\_SOD\_786.gcd  
Method Filename : Methode\_Chiral\_MUC\_2.gcm  
Batch Filename : batch\_chiral.gcb  
Vial # : 41  
Injection Volume : 1 uL  
Date Acquired : 24.07.2019 01:21:12  
Date Processed : 29.07.2019 14:08:27

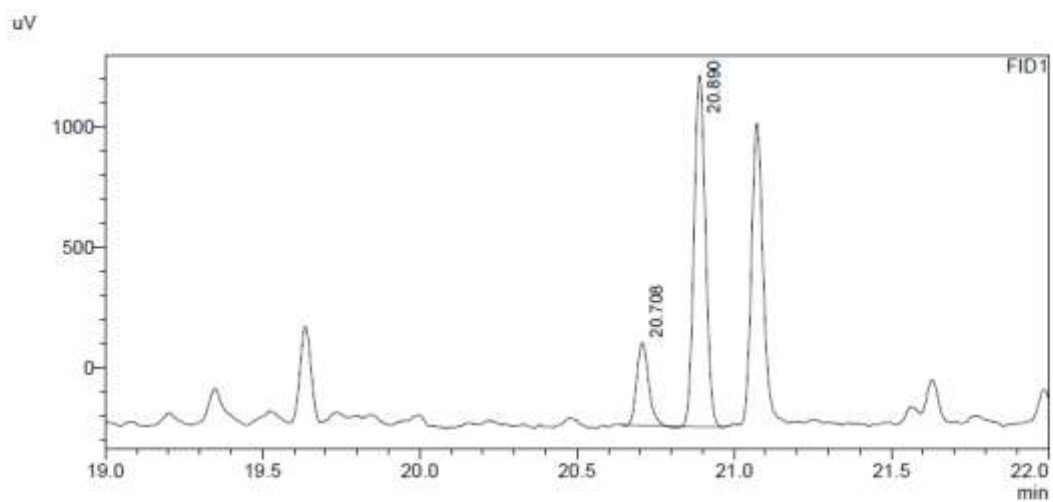

| Peak# | Ret. Time | Area | Area%   |
|-------|-----------|------|---------|
| 1     | 20.708    | 908  | 19.770  |
| 2     | 20.890    | 3685 | 80.230  |
| Total |           | 4593 | 100.000 |

t = 45 min

Sample Name : t=0,75\_SOD\_786  
Sample ID :  
Data Filename : t=0,75\_SOD\_786.gcd  
Method Filename : Methode\_Chiral\_MUC\_2.gcm  
Batch Filename : batch\_chiral.gcb  
Vial # : 47  
Injection Volume : 1 uL  
Date Acquired : 24.07.2019 06:08:07  
Date Processed : 29.07.2019 14:26:21

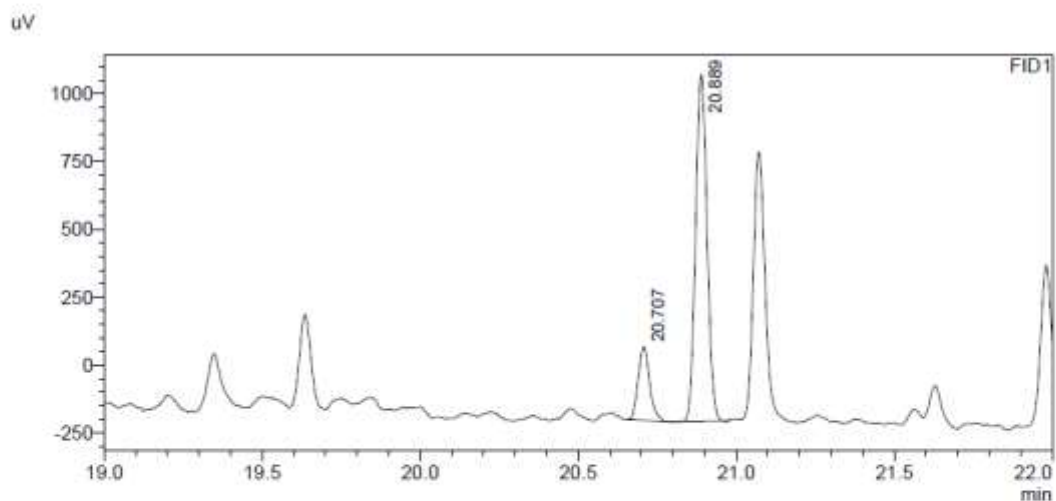

| Peak# | Ret. Time | Area | Area%   |
|-------|-----------|------|---------|
| 1     | 20.707    | 685  | 17.614  |
| 2     | 20.889    | 3205 | 82.386  |
| Total |           | 3890 | 100.000 |

t = 1 h

Sample Name : t=1\_SOD\_786  
Sample ID :  
Data Filename : t=1\_SOD\_786.gcd  
Method Filename : Methode\_Chiral\_MUC\_2.gcm  
Batch Filename : batch\_chiral.gcb  
Vial # : 53  
Injection Volume : 1 uL  
Date Acquired : 24.07.2019 10:55:18  
Date Processed : 29.07.2019 14:29:15

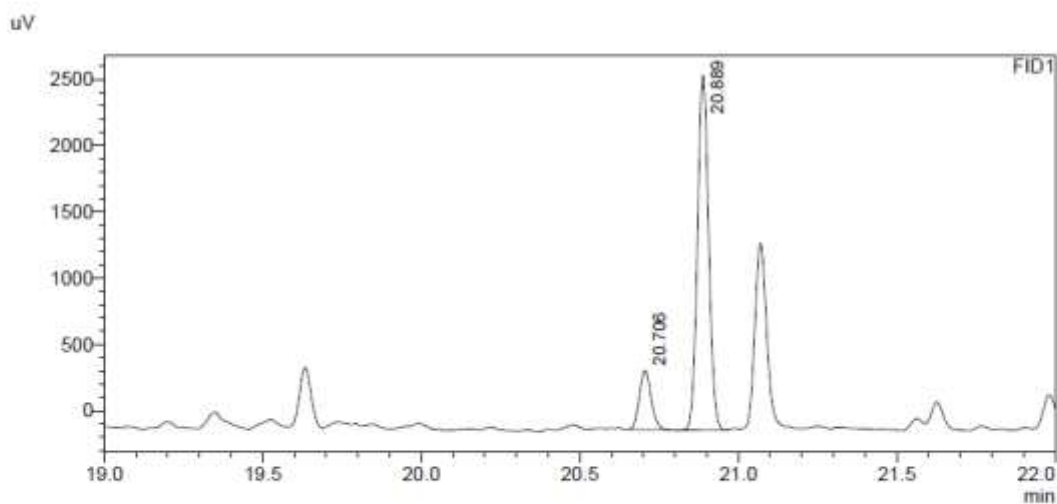

FID1

| Peak# | Ret. Time | Area | Area%   |
|-------|-----------|------|---------|
| 1     | 20.706    | 1153 | 14.998  |
| 2     | 20.889    | 6536 | 85.002  |
| Total |           | 7690 | 100.000 |

t = 1.5 h

Sample Name : t=1,5\_SOD\_786  
Sample ID :  
Data Filename : t=1,5\_SOD\_786.gcd  
Method Filename : Methode\_Chiral\_MUC\_2.gcm  
Batch Filename : batch\_chiral.gcb  
Vial # : 59  
Injection Volume : 1 uL  
Date Acquired : 24.07.2019 16:30:23  
Date Processed : 29.07.2019 14:32:52

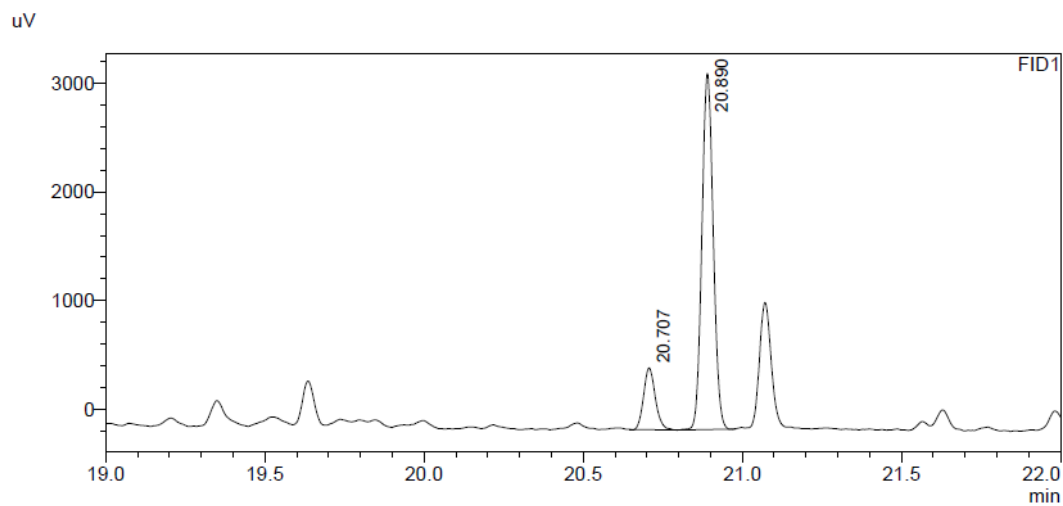

FID1

| Peak# | Ret. Time | Area | Area%   |
|-------|-----------|------|---------|
| 1     | 20.707    | 1451 | 15.153  |
| 2     | 20.890    | 8126 | 84.847  |
| Total |           | 9577 | 100.000 |

t = 2 h

Sample Name : t=2\_SOD\_786  
Sample ID :  
Data Filename : t=2\_SOD\_786.gcd  
Method Filename : Methode\_Chiral\_MUC\_2.gcm  
Batch Filename : batch\_chiral.gcb  
Vial # : 65  
Injection Volume : 1 uL  
Date Acquired : 24.07.2019 22:53:20  
Date Processed : 29.07.2019 14:35:21

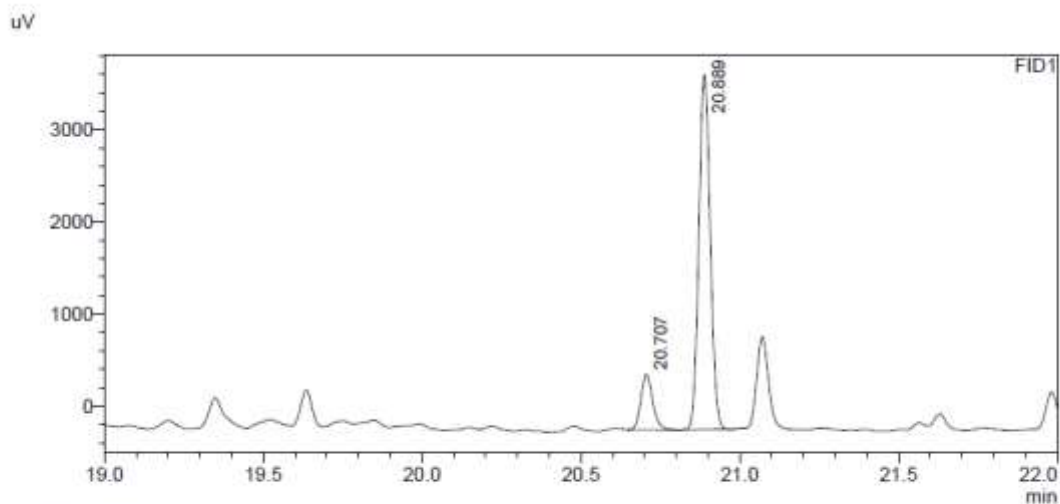

FID1

| Peak# | Ret. Time | Area  | Area%   |
|-------|-----------|-------|---------|
| 1     | 20.707    | 1579  | 14.134  |
| 2     | 20.889    | 9595  | 85.866  |
| Total |           | 11174 | 100.000 |



t = 2.5 h

Sample Name : t=2,5\_SOD\_786  
Sample ID :  
Data Filename : t=2,5\_SOD\_786.gcd  
Method Filename : Methode\_Chiral\_MUC\_2.gcm  
Batch Filename : batch\_chiral.gcb  
Vial # : 71  
Injection Volume : 1 uL  
Date Acquired : 25.07.2019 03:40:26  
Date Processed : 29.07.2019 14:38:29

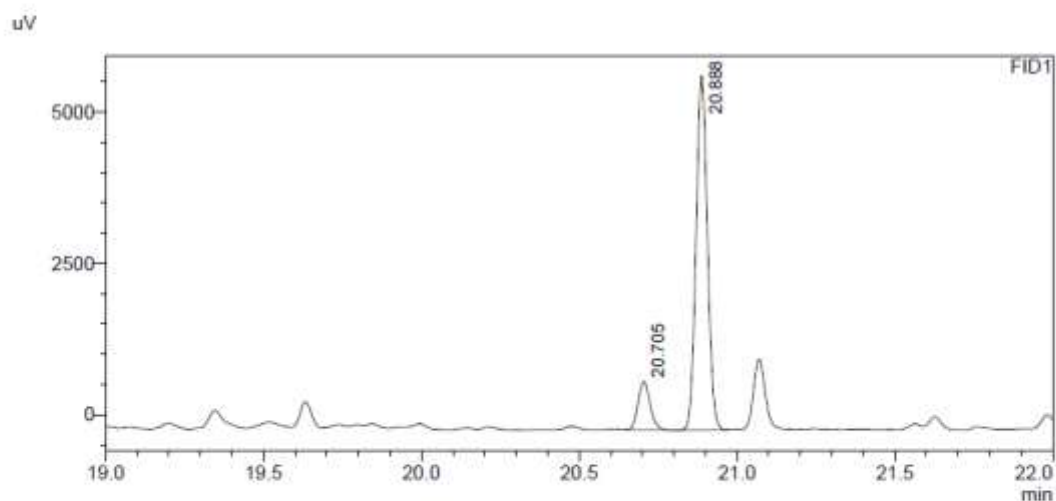

| Peak# | Ret. Time | Area  | Area%   |
|-------|-----------|-------|---------|
| 1     | 20.705    | 2085  | 12.482  |
| 2     | 20.888    | 14621 | 87.518  |
| Total |           | 16706 | 100.000 |

t = 3 h

Sample Name : t=3\_SOD\_786  
Sample ID :  
Data Filename : t=3\_SOD\_786.gcd  
Method Filename : Methode\_Chiral\_MUC\_2.gcm  
Batch Filename : batch\_chiral.gcb  
Vial # : 77  
Injection Volume : 1 uL  
Date Acquired : 25.07.2019 08:27:27  
Date Processed : 29.07.2019 14:41:49

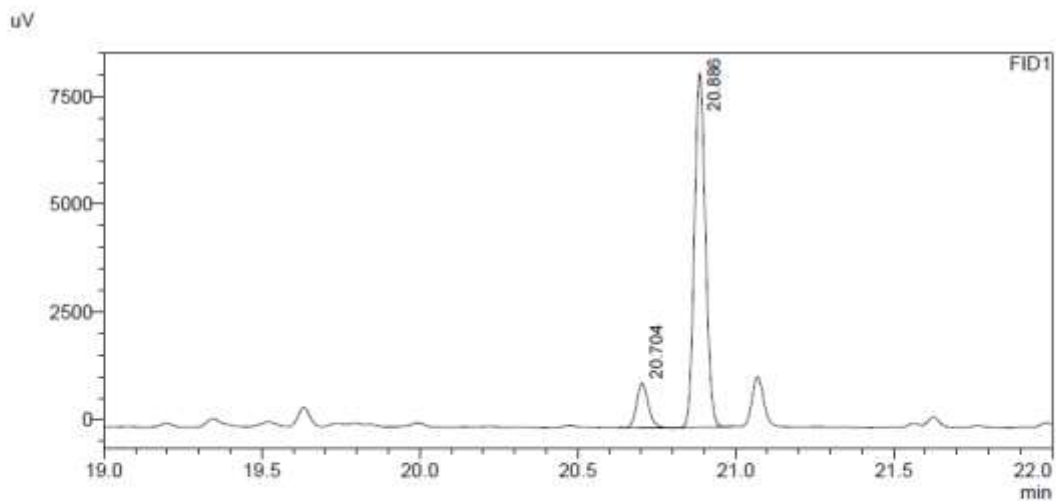

| Peak# | Ret. Time | Area  | Area%   |
|-------|-----------|-------|---------|
| 1     | 20.704    | 2680  | 11.795  |
| 2     | 20.886    | 20039 | 88.205  |
| Total |           | 22718 | 100.000 |

t = 3.5 h

Sample Name : t=3,5\_SOD\_786  
Sample ID :  
Data Filename : t=3,5\_SOD\_786.gcd  
Method Filename : Methode\_Chiral\_MUC\_2.gcm  
Batch Filename : batch\_chiral.gcb  
Vial # : 83  
Injection Volume : 1 uL  
Date Acquired : 25.07.2019 14:50:28  
Date Processed : 29.07.2019 14:43:52

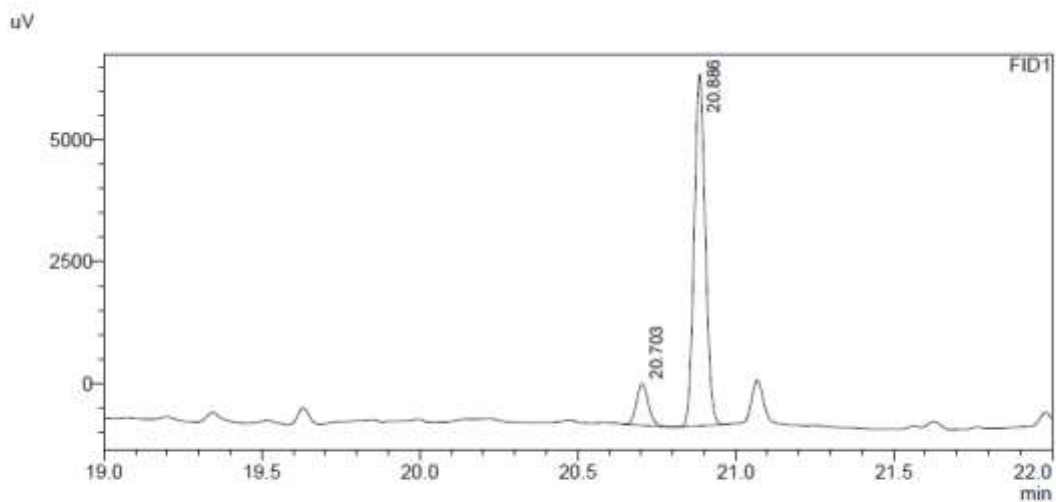

| Peak# | Ret. Time | Area  | Area%   |
|-------|-----------|-------|---------|
| 1     | 20.703    | 2196  | 11.043  |
| 2     | 20.886    | 17690 | 88.957  |
| Total |           | 19886 | 100.000 |

t = 4 h

Sample Name : t=4\_SOD\_786  
Sample ID :  
Data Filename : t=4\_SOD\_786.gcd  
Method Filename : Methode\_Chiral\_MUC\_2.gcm  
Batch Filename : batch\_chiral.gcb  
Vial # : 89  
Injection Volume : 1 uL  
Date Acquired : 25.07.2019 22:33:33  
Date Processed : 29.07.2019 14:53:19

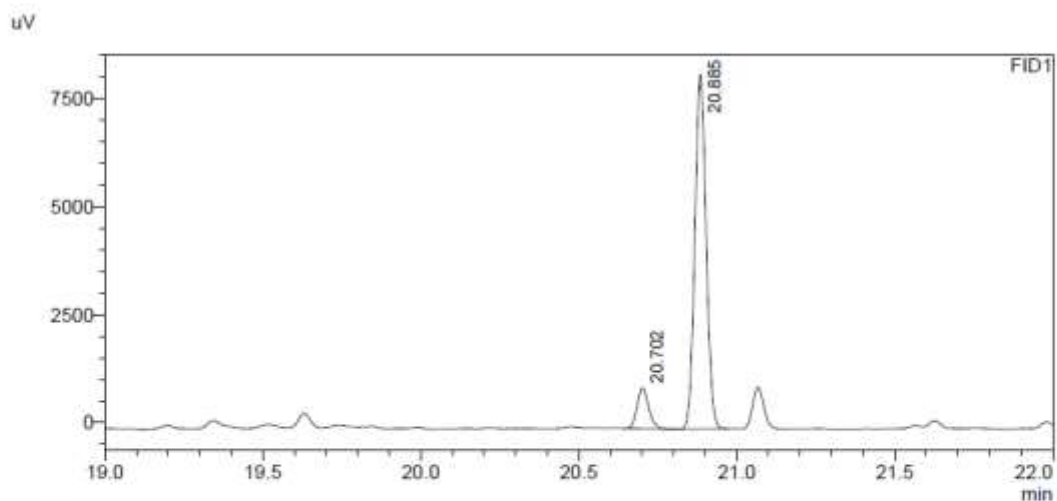

FID1

| Peak# | Ret. Time | Area  | Area%   |
|-------|-----------|-------|---------|
| 1     | 20.702    | 2427  | 10.660  |
| 2     | 20.885    | 20337 | 89.340  |
| Total |           | 22764 | 100.000 |

t = 5 h

Sample Name : t=5\_SOD\_786  
Sample ID :  
Data Filename : t=5\_SOD\_786.gcd  
Method Filename : Methode\_Chiral\_MUC\_2.gcm  
Batch Filename : batch\_chiral.gcb  
Vial # : 95  
Injection Volume : 1 uL  
Date Acquired : 26.07.2019 04:08:30  
Date Processed : 29.07.2019 14:56:21

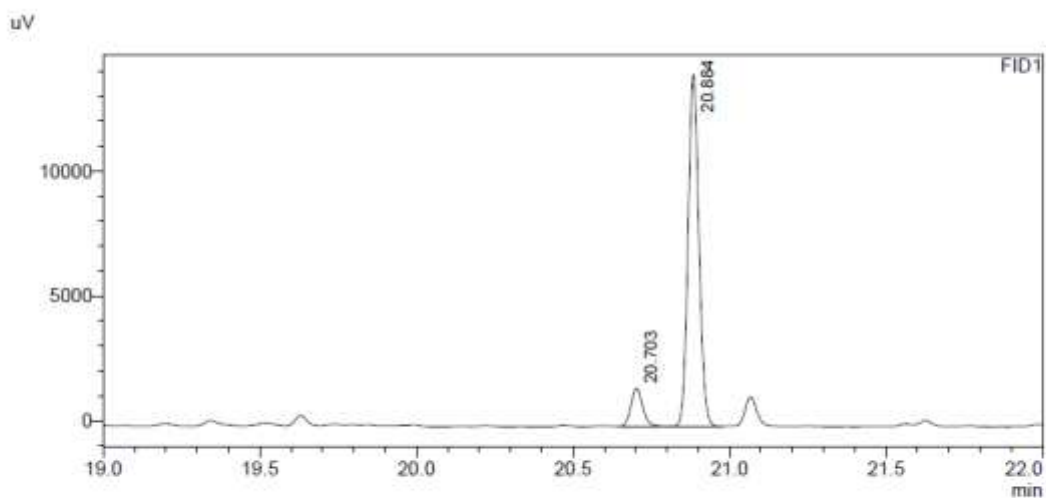

FID1

| Peak# | Ret. Time | Area  | Area%   |
|-------|-----------|-------|---------|
| 1     | 20.703    | 3875  | 10.249  |
| 2     | 20.884    | 33932 | 89.751  |
| Total |           | 37807 | 100.000 |

t = 6 h

Sample Name : t=6\_SOD\_786  
Sample ID :  
Data Filename : t=6\_SOD\_786.gcd  
Method Filename : Methode\_Chiral\_MUC\_2.gcm  
Batch Filename : batch\_chiral.gcb  
Vial # : 101  
Injection Volume : 1 uL  
Date Acquired : 26.07.2019 11:51:29  
Date Processed : 29.07.2019 14:58:14

uV

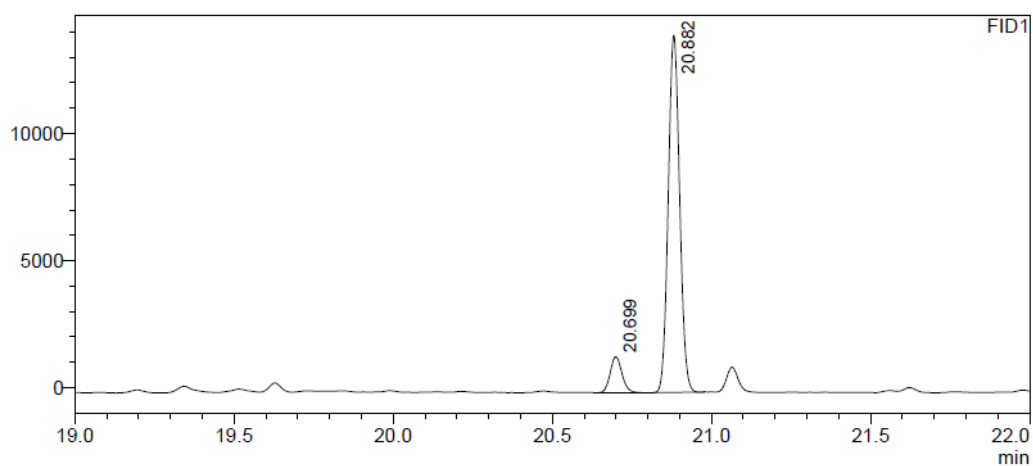

FID1

| Peak# | Ret. Time | Area  | Area%   |
|-------|-----------|-------|---------|
| 1     | 20.699    | 3680  | 9.535   |
| 2     | 20.882    | 34914 | 90.465  |
| Total |           | 38594 | 100.000 |

t = 7 h

Sample Name : t=7\_SOD\_786  
Sample ID :  
Data Filename : t=7\_SOD\_786.gcd  
Method Filename : Methode\_Chiral\_MUC\_2.gcm  
Batch Filename : batch\_chiral.gcb  
Vial # : 107  
Injection Volume : 1 uL  
Date Acquired : 26.07.2019 17:26:39  
Date Processed : 29.07.2019 15:29:51

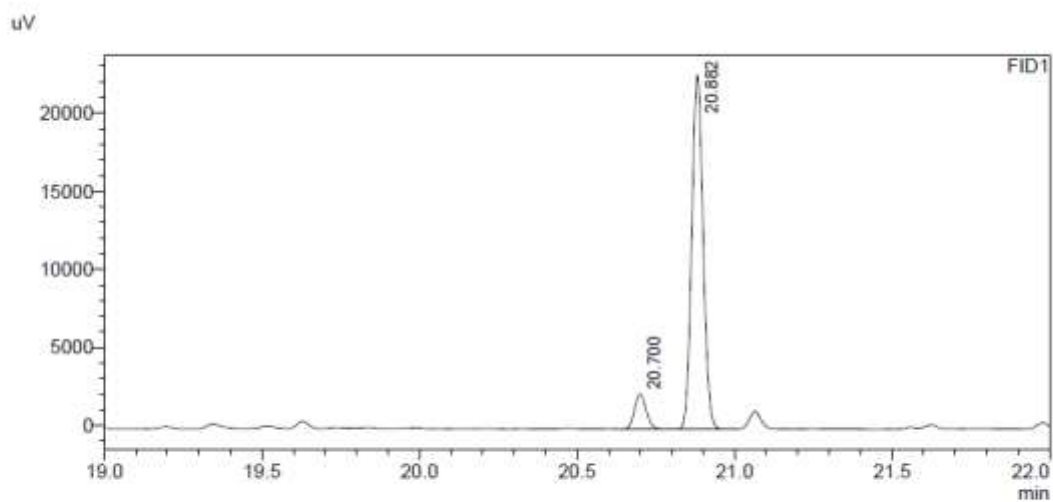

| Peak# | Ret. Time | Area  | Area%   |
|-------|-----------|-------|---------|
| 1     | 20.700    | 5778  | 9.240   |
| 2     | 20.882    | 56751 | 90.760  |
| Total |           | 62529 | 100.000 |

t = 8 h

Sample Name : t=8\_SOD\_786  
Sample ID :  
Data Filename : t=8\_SOD\_786.gcd  
Method Filename : Methode\_Chiral\_MUC\_2.gcm  
Batch Filename : batch\_chiral.gcb  
Vial # : 113  
Injection Volume : 1 uL  
Date Acquired : 26.07.2019 23:01:47  
Date Processed : 29.07.2019 15:32:53

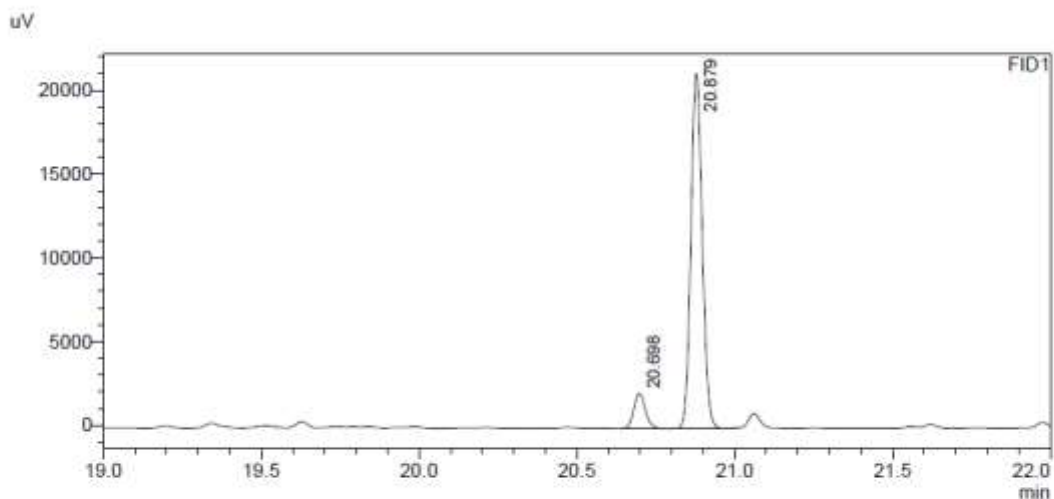

FID1

| Peak# | Ret. Time | Area  | Area%   |
|-------|-----------|-------|---------|
| 1     | 20.698    | 5296  | 9.094   |
| 2     | 20.879    | 52941 | 90.906  |
| Total |           | 58237 | 100.000 |



t = 9 h

Sample Name : t=9\_SOD\_786  
Sample ID :  
Data Filename : t=9\_SOD\_786.gcd  
Method Filename : Methode\_Chiral\_MUC\_2.gcm  
Batch Filename : batch\_chiral.gcb  
Vial # : 119  
Injection Volume : 1 uL  
Date Acquired : 27.07.2019 03:48:56  
Date Processed : 29.07.2019 15:35:27

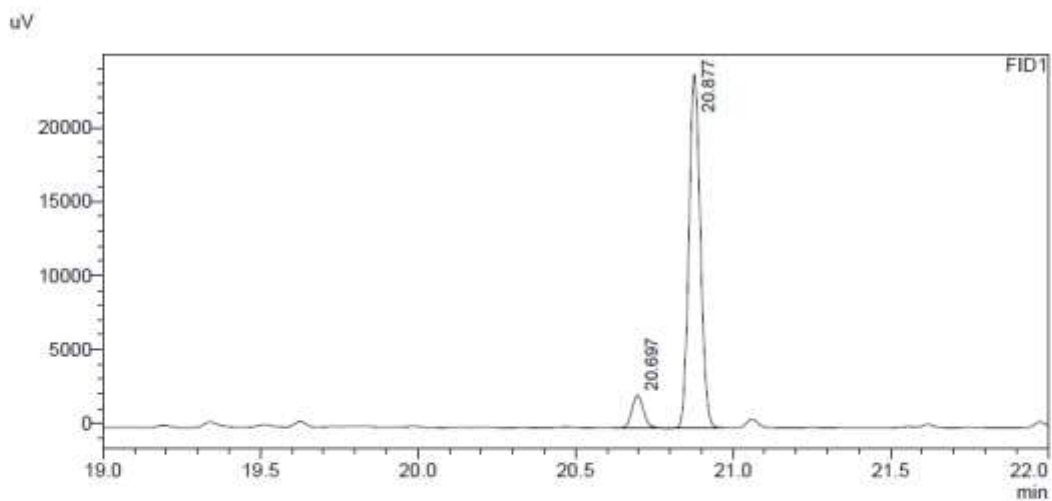

FID1

| Peak# | Ret. Time | Area  | Area%   |
|-------|-----------|-------|---------|
| 1     | 20.697    | 5689  | 8.620   |
| 2     | 20.877    | 60310 | 91.380  |
| Total |           | 66000 | 100.000 |

t = 10 h

Sample Name : t=10\_SOD\_786  
Sample ID :  
Data Filename : t=10\_SOD\_786.gcd  
Method Filename : Methode\_Chiral\_MUC\_2.gcm  
Batch Filename : batch\_chiral.gcb  
Vial # : 125  
Injection Volume : 1 uL  
Date Acquired : 27.07.2019 08:35:48  
Date Processed : 29.07.2019 15:38:18

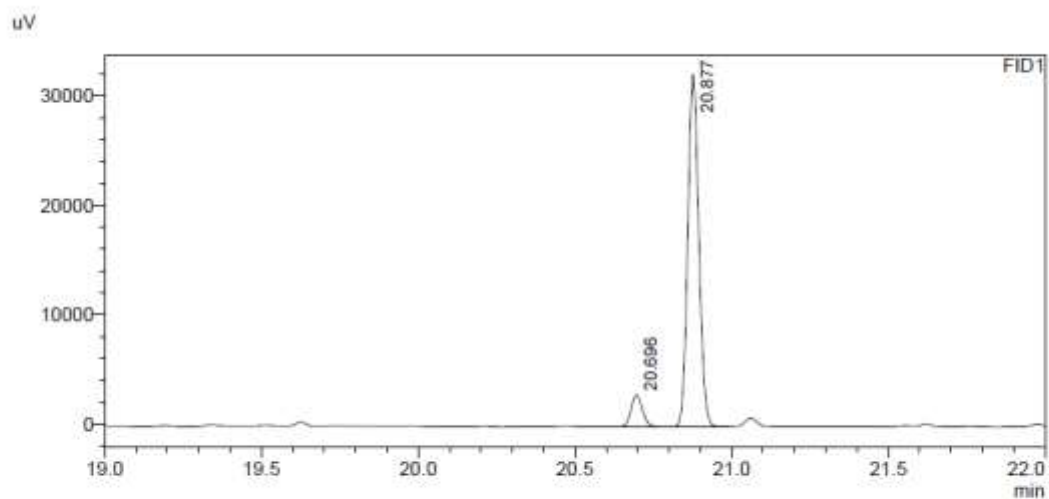

FID1

| Peak# | Ret. Time | Area  | Area%   |
|-------|-----------|-------|---------|
| 1     | 20.696    | 7323  | 8.504   |
| 2     | 20.877    | 78785 | 91.496  |
| Total |           | 86108 | 100.000 |

t = 11 h

Sample Name : t=11\_SOD\_786  
Sample ID :  
Data Filename : t=11\_SOD\_786.gcd  
Method Filename : Methode\_Chiral\_MUC\_2.gcm  
Batch Filename : batch\_chiral.gcb  
Vial # : 131  
Injection Volume : 1 uL  
Date Acquired : 27.07.2019 13:22:59  
Date Processed : 29.07.2019 15:50:13

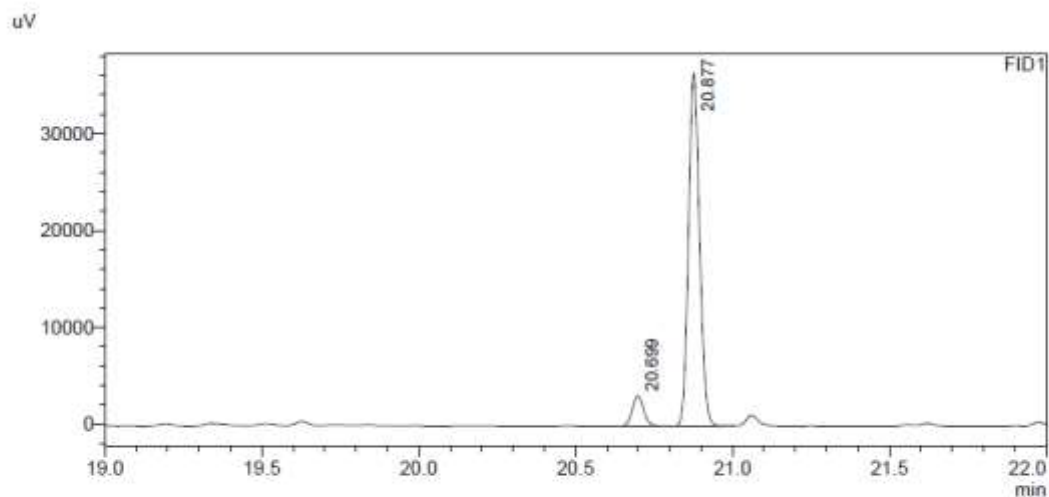

FID1

| Peak# | Ret. Time | Area  | Area%   |
|-------|-----------|-------|---------|
| 1     | 20.699    | 7834  | 8.083   |
| 2     | 20.877    | 89082 | 91.917  |
| Total |           | 96916 | 100.000 |

t = 24 h

Sample Name : t=24\_SOD\_786  
Sample ID :  
Data Filename : t=24\_SOD\_786.gcd  
Method Filename : Methode\_Chiral\_MUC\_2.gcm  
Batch Filename : batch\_chiral.gcb  
Vial # : 137  
Injection Volume : 1 uL  
Date Acquired : 27.07.2019 18:10:02  
Date Processed : 29.07.2019 15:54:50

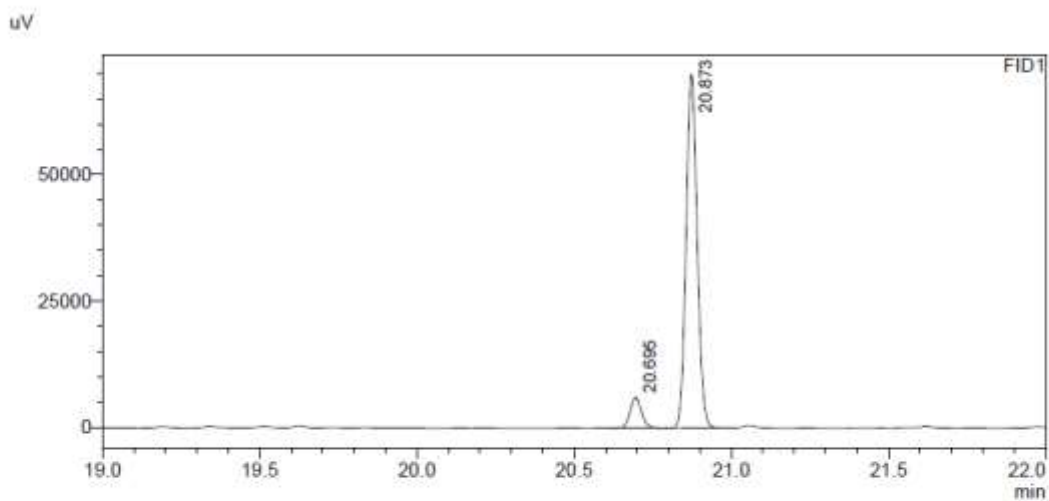

| Peak# | Ret. Time | Area   | Area%   |
|-------|-----------|--------|---------|
| 1     | 20.695    | 14998  | 8.043   |
| 2     | 20.873    | 171476 | 91.957  |
| Total |           | 186474 | 100.000 |

t = 48 h

Sample Name : t=48\_SOD\_786  
Sample ID :  
Data Filename : t=48\_SOD\_786.gcd  
Method Filename : Methode\_Chiral\_MUC\_2.gcm  
Batch Filename : batch\_chiral.gcb  
Vial # : 143  
Injection Volume : 1 uL  
Date Acquired : 27.07.2019 22:56:46  
Date Processed : 29.07.2019 15:59:19

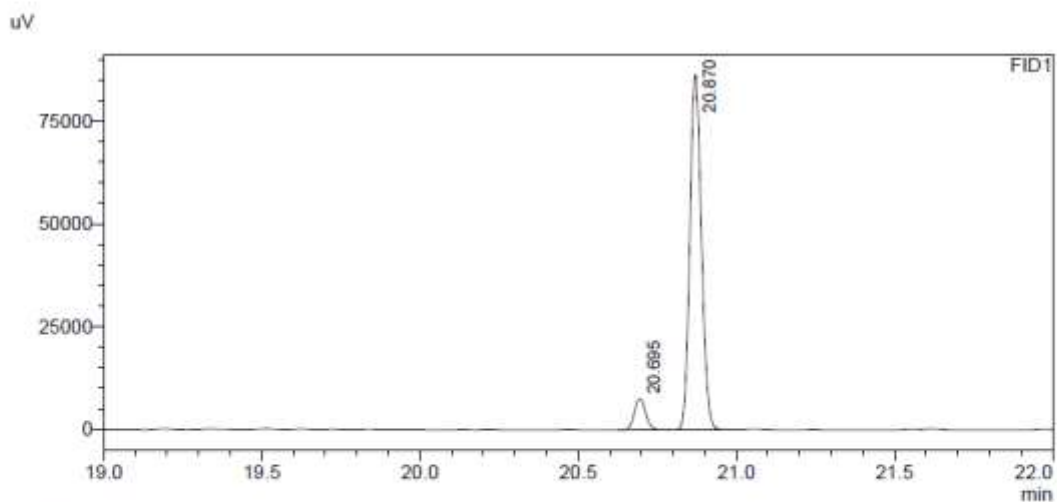

| Peak# | Ret. Time | Area   | Area%   |
|-------|-----------|--------|---------|
| 1     | 20.695    | 19053  | 8.004   |
| 2     | 20.870    | 218995 | 91.996  |
| Total |           | 238048 | 100.000 |

t = 72 h

Sample Name : t=72\_SOD\_786  
Sample ID :  
Data Filename : t=72\_SOD\_786.gcd  
Method Filename : Methode\_Chiral\_MUC\_2.gcm  
Batch Filename : batch\_chiral.gcb  
Vial # : 149  
Injection Volume : 1 uL  
Date Acquired : 28.07.2019 03:43:40  
Date Processed : 29.07.2019 16:04:35

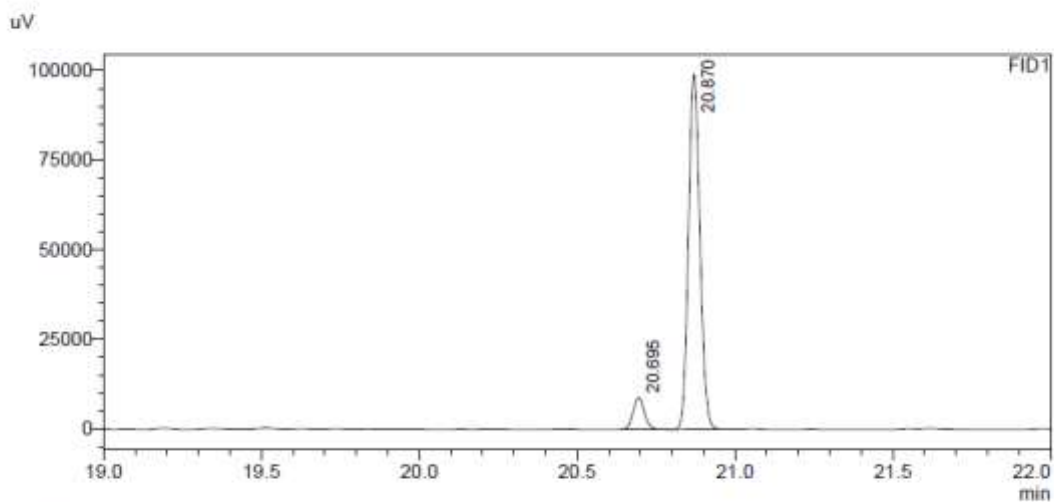

FID1

| Peak# | Ret. Time | Area   | Area%   |
|-------|-----------|--------|---------|
| 1     | 20.695    | 21971  | 8.094   |
| 2     | 20.870    | 249478 | 91.906  |
| Total |           | 271449 | 100.000 |

No I, *i*PrOH

t = 15 min

Sample Name : t=0,25\_SOD\_790  
Sample ID :  
Data Filename : t=0,25\_SOD\_790.gcd  
Method Filename : Methode\_Chiral\_MUC\_2.gcm  
Batch Filename : batch\_chiral.gcb  
Vial # : 39  
Injection Volume : 1 uL  
Date Acquired : 23.07.2019 23:45:30  
Date Processed : 29.07.2019 14:07:28

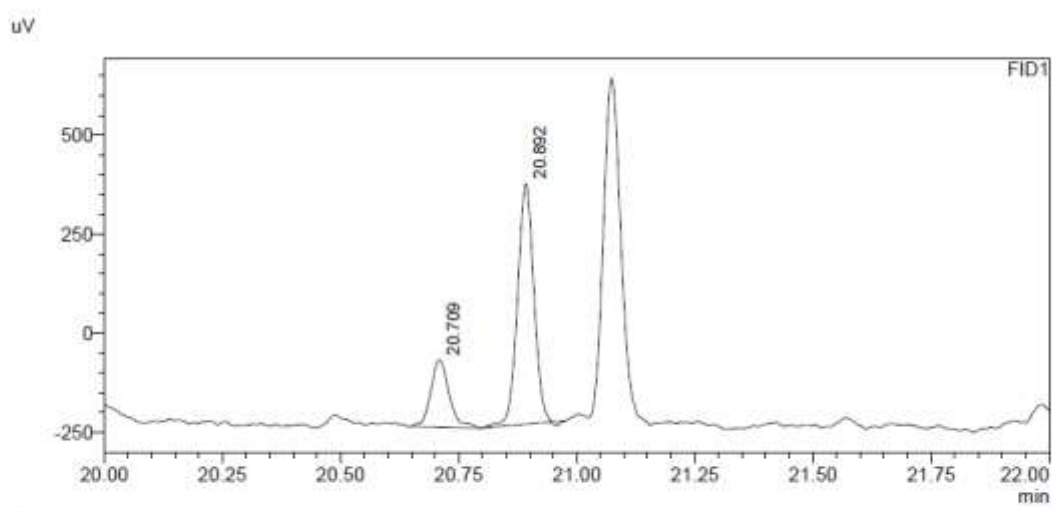

FID1

| Peak# | Ret. Time | Area | Area%   |
|-------|-----------|------|---------|
| 1     | 20.709    | 456  | 23.903  |
| 2     | 20.892    | 1452 | 76.097  |
| Total |           | 1907 | 100.000 |

t = 30min

Sample Name : t=0,5\_SOD\_790  
Sample ID :  
Data Filename : t=0,5\_SOD\_790.gcd  
Method Filename : Methode\_Chiral\_MUC\_2.gcm  
Batch Filename : batch\_chiral.gcb  
Vial # : 45  
Injection Volume : 1 uL  
Date Acquired : 24.07.2019 04:32:33  
Date Processed : 29.07.2019 14:10:02

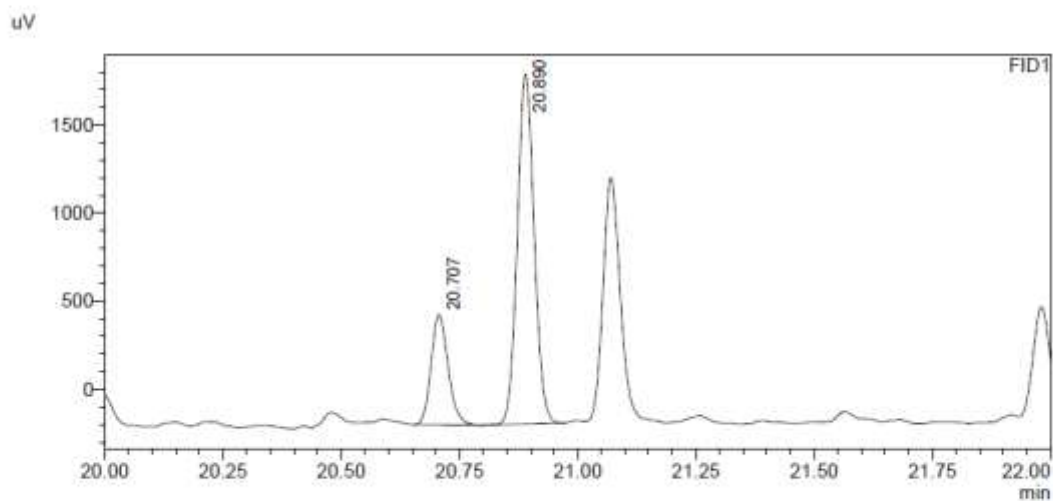

FID1

| Peak# | Ret. Time | Area | Area%   |
|-------|-----------|------|---------|
| 1     | 20.707    | 1556 | 23.995  |
| 2     | 20.890    | 4928 | 76.005  |
| Total |           | 6484 | 100.000 |



t = 45 min

Sample Name : t=0,75\_SOD\_790  
Sample ID :  
Data Filename : t=0,75\_SOD\_790.gcd  
Method Filename : Methode\_Chiral\_MUC\_2.gcm  
Batch Filename : batch\_chiral.gcb  
Vial # : 51  
Injection Volume : 1 uL  
Date Acquired : 24.07.2019 09:19:31  
Date Processed : 29.07.2019 14:28:04

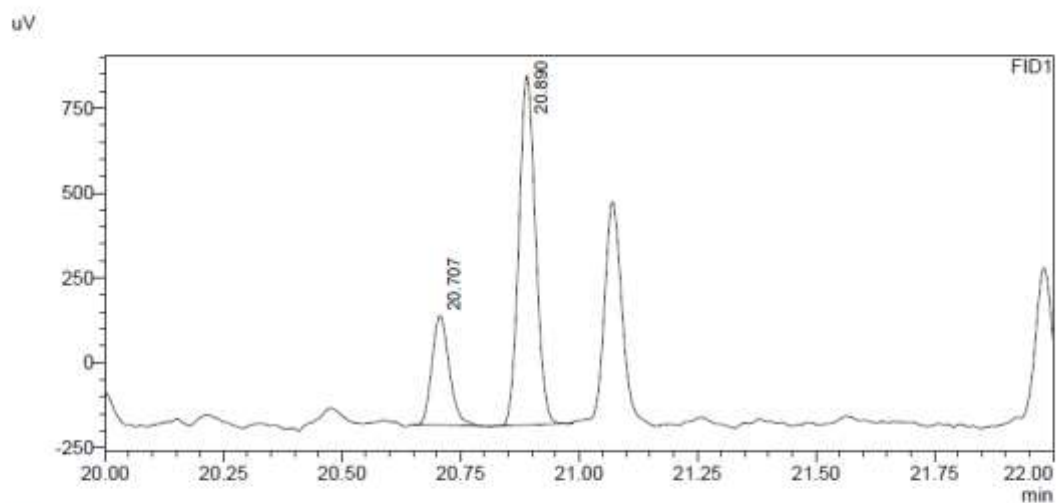

| Peak# | Ret. Time | Area | Area%   |
|-------|-----------|------|---------|
| 1     | 20.707    | 822  | 24.594  |
| 2     | 20.890    | 2519 | 75.406  |
| Total |           | 3341 | 100.000 |

t = 1 h

Sample Name : t=1\_SOD\_790  
Sample ID :  
Data Filename : t=1\_SOD\_790.gcd  
Method Filename : Methode\_Chiral\_MUC\_2.gcm  
Batch Filename : batch\_chiral.gcb  
Vial # : 57  
Injection Volume : 1 uL  
Date Acquired : 24.07.2019 14:54:36  
Date Processed : 29.07.2019 14:30:56

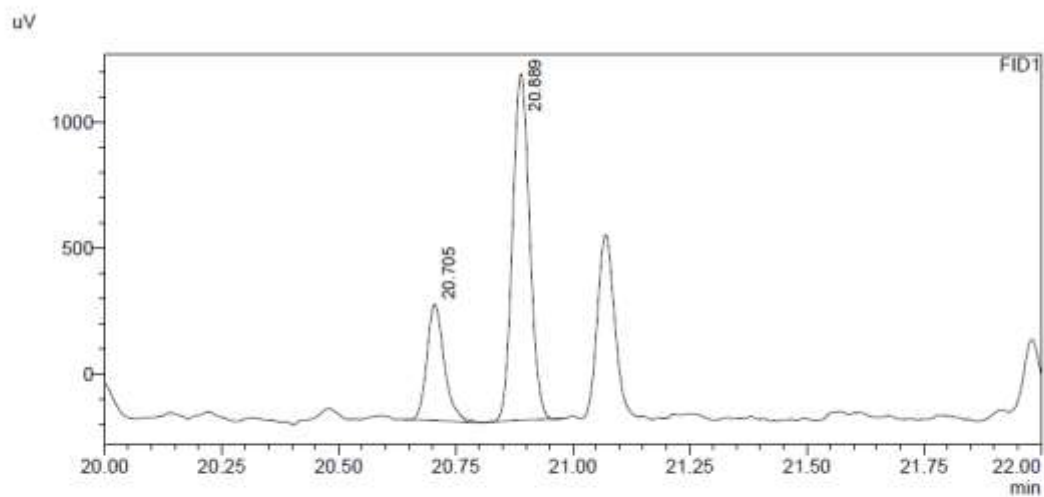

FID1

| Peak# | Ret. Time | Area | Area%   |
|-------|-----------|------|---------|
| 1     | 20.705    | 1202 | 25.580  |
| 2     | 20.889    | 3496 | 74.420  |
| Total |           | 4698 | 100.000 |

t = 1.5 h

Sample Name : t=1,5\_SOD\_790  
Sample ID :  
Data Filename : t=1,5\_SOD\_790.gcd  
Method Filename : Methode\_Chiral\_MUC\_2.gcm  
Batch Filename : batch\_chiral.gcb  
Vial # : 63  
Injection Volume : 1 uL  
Date Acquired : 24.07.2019 21:17:34  
Date Processed : 29.07.2019 14:34:12

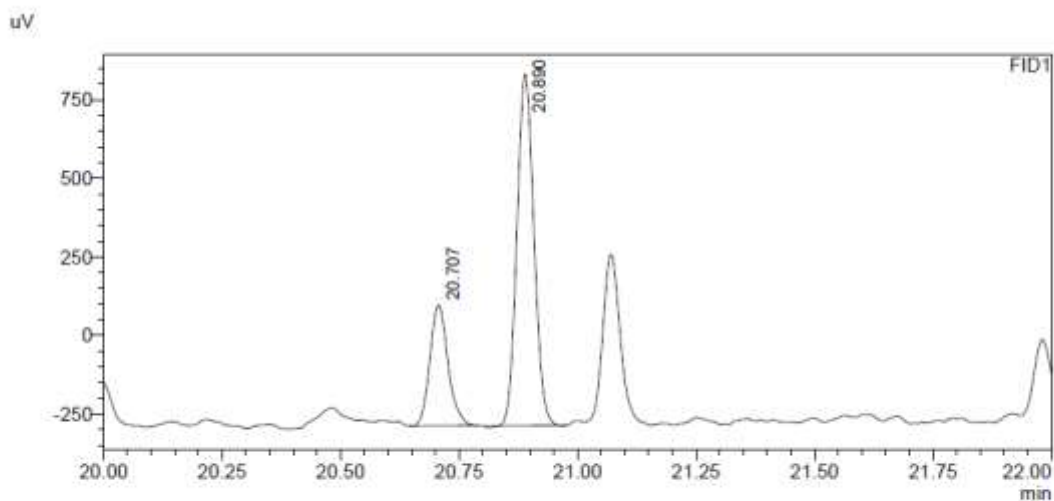

FID1

| Peak# | Ret. Time | Area | Area%   |
|-------|-----------|------|---------|
| 1     | 20.707    | 1021 | 26.799  |
| 2     | 20.890    | 2790 | 73.201  |
| Total |           | 3812 | 100.000 |

t = 2 h

Sample Name : t=2\_SOD\_790  
Sample ID :  
Data Filename : t=2\_SOD\_790.gcd  
Method Filename : Methode\_Chiral\_MUC\_2.gcm  
Batch Filename : batch\_chiral.gcb  
Vial # : 69  
Injection Volume : 1 uL  
Date Acquired : 25.07.2019 02:04:43  
Date Processed : 29.07.2019 14:37:32

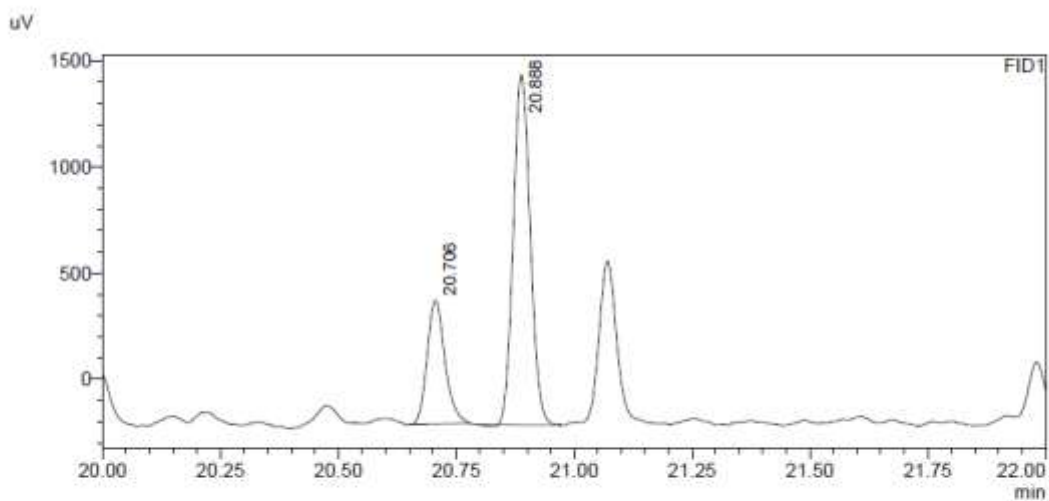

FID1

| Peak# | Ret. Time | Area | Area%   |
|-------|-----------|------|---------|
| 1     | 20.706    | 1535 | 27.127  |
| 2     | 20.888    | 4123 | 72.873  |
| Total |           | 5658 | 100.000 |

t = 2.5 h

Sample Name : t=2,5\_SOD\_790  
Sample ID :  
Data Filename : t=2,5\_SOD\_790.gcd  
Method Filename : Methode\_Chiral\_MUC\_2.gcm  
Batch Filename : batch\_chiral.gcb  
Vial # : 75  
Injection Volume : 1 uL  
Date Acquired : 25.07.2019 06:51:43  
Date Processed : 29.07.2019 14:39:50

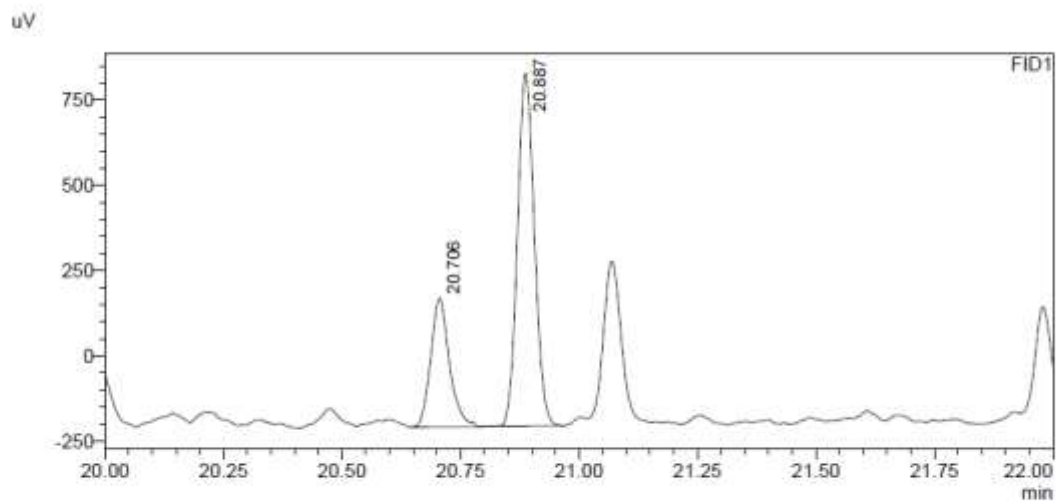

FID1

| Peak# | Ret. Time | Area | Area%   |
|-------|-----------|------|---------|
| 1     | 20.706    | 1032 | 28.728  |
| 2     | 20.887    | 2561 | 71.272  |
| Total |           | 3594 | 100.000 |

t = 3 h

Sample Name : t=3\_SOD\_790  
Sample ID :  
Data Filename : t=3\_SOD\_790.gcd  
Method Filename : Methode\_Chiral\_MUC\_2.gcm  
Batch Filename : batch\_chiral.gcb  
Vial # : 81  
Injection Volume : 1 uL  
Date Acquired : 25.07.2019 11:39:01  
Date Processed : 29.07.2019 14:43:05

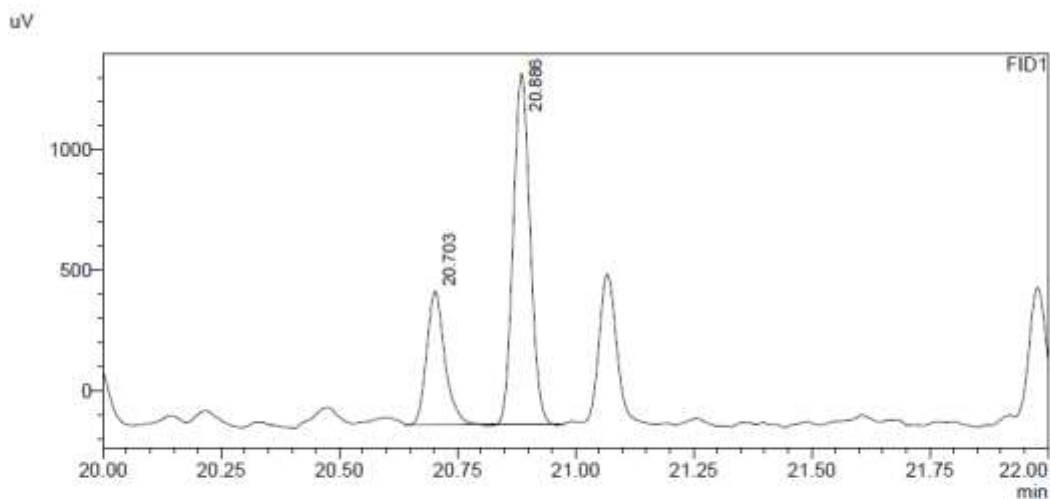

FID1

| Peak# | Ret. Time | Area | Area%   |
|-------|-----------|------|---------|
| 1     | 20.703    | 1467 | 29.072  |
| 2     | 20.886    | 3580 | 70.928  |
| Total |           | 5047 | 100.000 |

t = 3.5 h

Sample Name : t=3,5\_SOD\_790  
Sample ID :  
Data Filename : t=3,5\_SOD\_790.gcd  
Method Filename : Methode\_Chiral\_MUC\_2.gcm  
Batch Filename : batch\_chiral.gcb  
Vial # : 87  
Injection Volume : 1 uL  
Date Acquired : 25.07.2019 20:57:48  
Date Processed : 29.07.2019 14:45:13

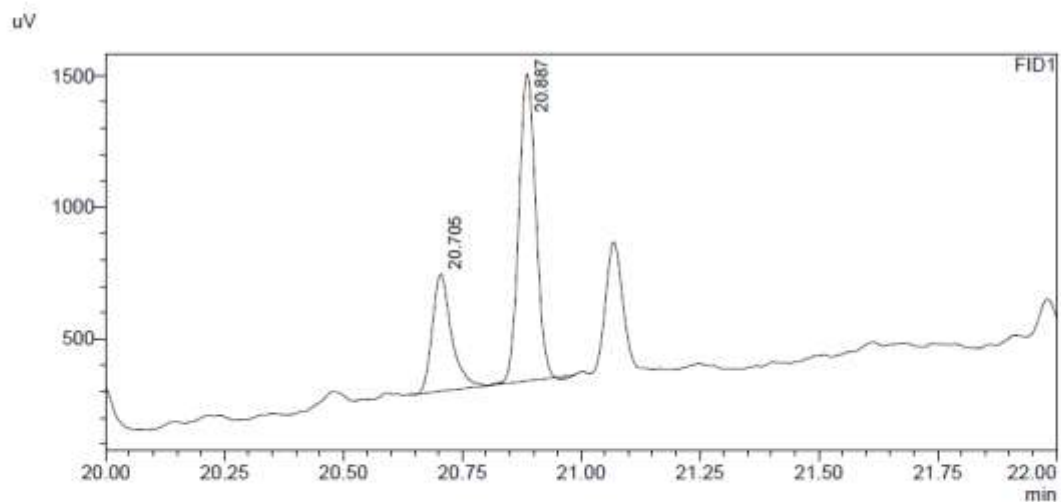

FID1

| Peak# | Ret. Time | Area | Area%   |
|-------|-----------|------|---------|
| 1     | 20.705    | 1249 | 30.229  |
| 2     | 20.887    | 2884 | 69.771  |
| Total |           | 4133 | 100.000 |

t = 4 h

Sample Name : t=4\_SOD\_790  
Sample ID :  
Data Filename : t=4\_SOD\_790.gcd  
Method Filename : Methode\_Chiral\_MUC\_2.gcm  
Batch Filename : batch\_chiral.gcb  
Vial # : 93  
Injection Volume : 1 uL  
Date Acquired : 26.07.2019 02:32:46  
Date Processed : 29.07.2019 14:55:31

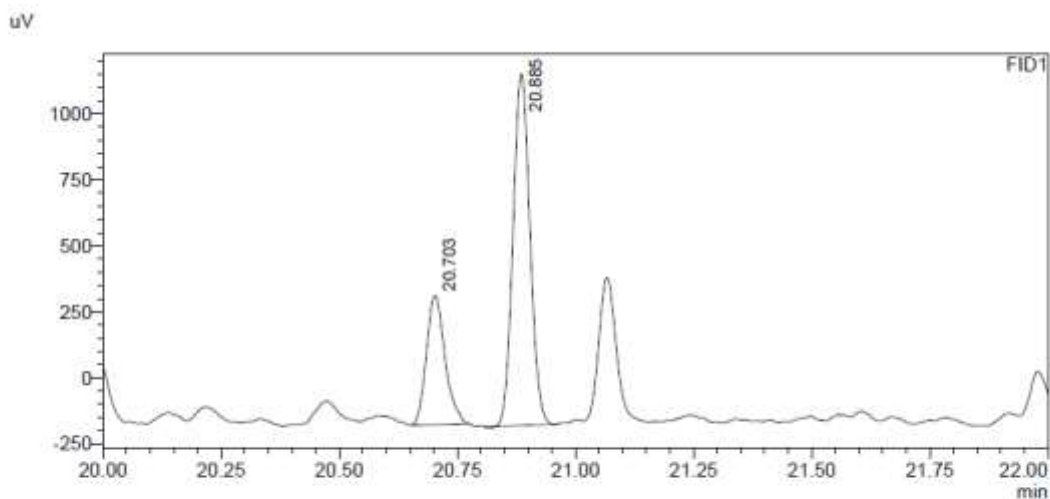

FID1

| Peak# | Ret. Time | Area | Area%   |
|-------|-----------|------|---------|
| 1     | 20.703    | 1338 | 28.739  |
| 2     | 20.885    | 3317 | 71.261  |
| Total |           | 4655 | 100.000 |



t = 5 h

Sample Name : t=5\_SOD\_790  
Sample ID :  
Data Filename : t=5\_SOD\_790.gcd  
Method Filename : Methode\_Chiral\_MUC\_2.gcm  
Batch Filename : batch\_chiral.gcb  
Vial # : 99  
Injection Volume : 1 uL  
Date Acquired : 26.07.2019 07:19:59  
Date Processed : 29.07.2019 14:57:30

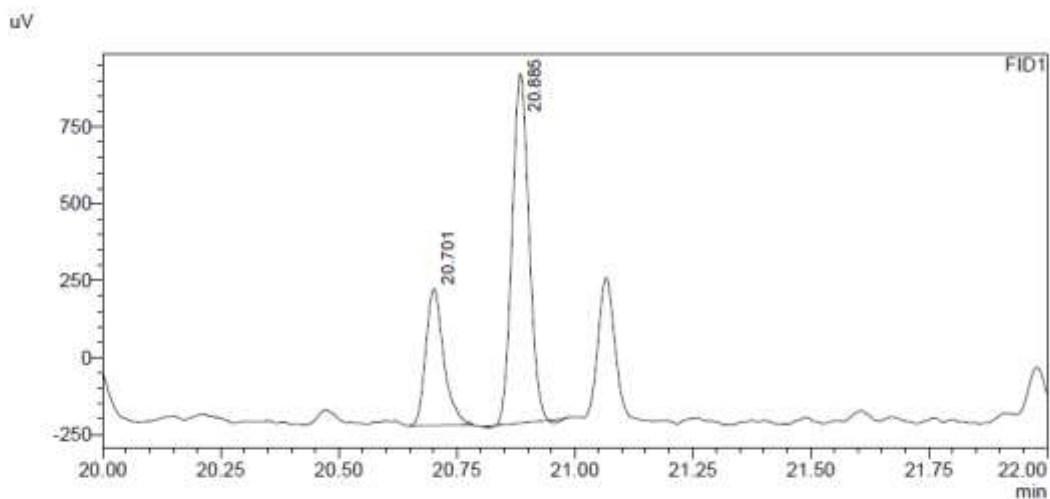

FID1

| Peak# | Ret. Time | Area | Area%   |
|-------|-----------|------|---------|
| 1     | 20.701    | 1179 | 29.615  |
| 2     | 20.885    | 2803 | 70.385  |
| Total |           | 3982 | 100.000 |

t = 6 h

Sample Name : t=6\_SOD\_790  
Sample ID :  
Data Filename : t=6\_SOD\_790.gcd  
Method Filename : Methode\_Chiral\_MUC\_2.gcm  
Batch Filename : batch\_chiral.gcb  
Vial # : 105  
Injection Volume : 1 uL  
Date Acquired : 26.07.2019 15:50:52  
Date Processed : 29.07.2019 14:59:36

uV

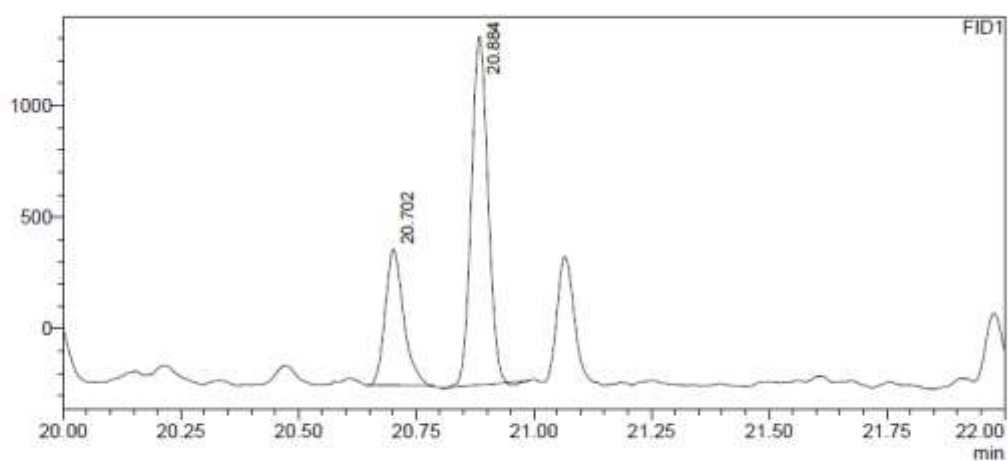

FID1

| Peak# | Ret. Time | Area | Area%   |
|-------|-----------|------|---------|
| 1     | 20.702    | 1652 | 30.201  |
| 2     | 20.884    | 3819 | 69.799  |
| Total |           | 5471 | 100.000 |

t = 7 h

Sample Name : t=7\_SOD\_790  
Sample ID :  
Data Filename : t=7\_SOD\_790.gcd  
Method Filename : Methode\_Chiral\_MUC\_2.gcm  
Batch Filename : batch\_chiral.gcb  
Vial # : 111  
Injection Volume : 1 uL  
Date Acquired : 26.07.2019 21:26:05  
Date Processed : 29.07.2019 15:32:06

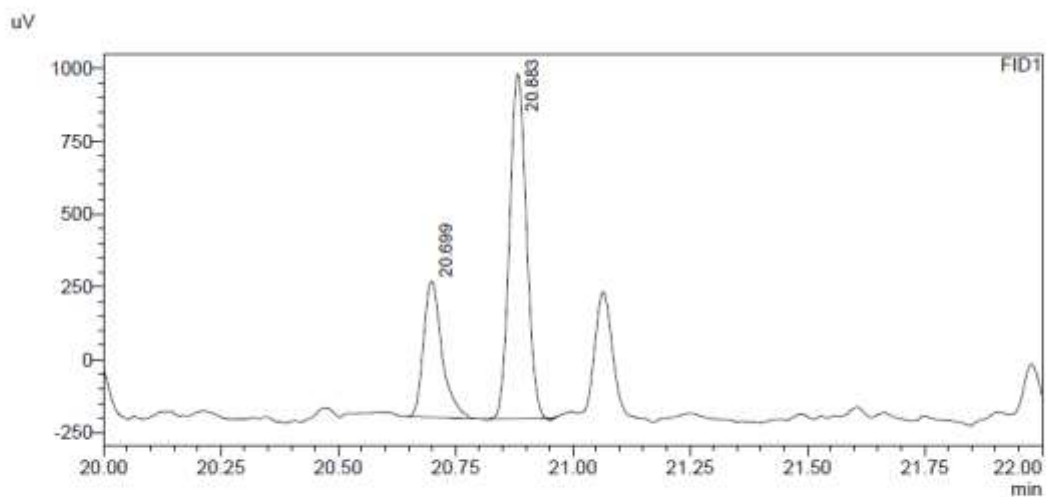

FID1

| Peak# | Ret. Time | Area | Area%   |
|-------|-----------|------|---------|
| 1     | 20.699    | 1277 | 30.156  |
| 2     | 20.883    | 2958 | 69.844  |
| Total |           | 4235 | 100.000 |

t = 8 h

Sample Name : t=8\_SOD\_790  
Sample ID :  
Data Filename : t=8\_SOD\_790.gcd  
Method Filename : Methode\_Chiral\_MUC\_2.gcm  
Batch Filename : batch\_chiral.gcb  
Vial # : 117  
Injection Volume : 1 uL  
Date Acquired : 27.07.2019 02:13:14  
Date Processed : 29.07.2019 15:34:38

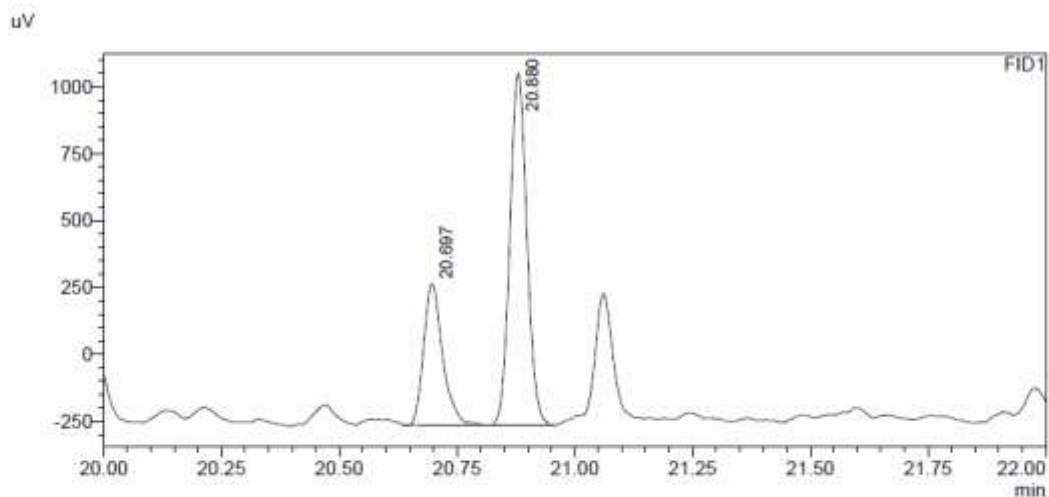

FID1

| Peak# | Ret. Time | Area | Area%   |
|-------|-----------|------|---------|
| 1     | 20.697    | 1473 | 30.919  |
| 2     | 20.880    | 3292 | 69.081  |
| Total |           | 4766 | 100.000 |

t = 9 h

Sample Name : t=9\_SOD\_790  
Sample ID :  
Data Filename : t=9\_SOD\_790.gcd  
Method Filename : Methode\_Chiral\_MUC\_2.gcm  
Batch Filename : batch\_chiral.gcb  
Vial # : 123  
Injection Volume : 1 uL  
Date Acquired : 27.07.2019 07:00:15  
Date Processed : 29.07.2019 15:37:17

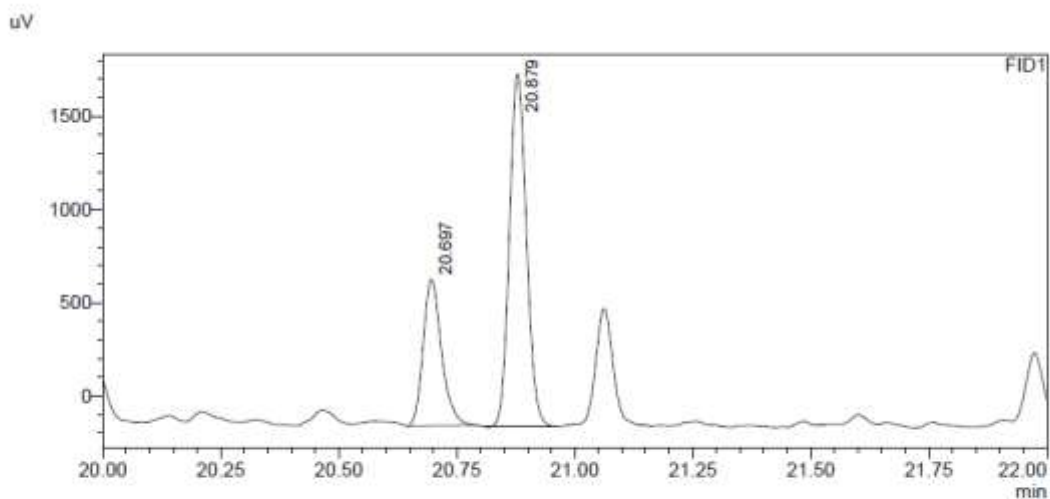

FID1

| Peak# | Ret. Time | Area | Area%   |
|-------|-----------|------|---------|
| 1     | 20.697    | 2132 | 31.068  |
| 2     | 20.879    | 4730 | 68.932  |
| Total |           | 6861 | 100.000 |

t = 10 h

Sample Name : t=10\_SOD\_790  
Sample ID :  
Data Filename : t=10\_SOD\_790.gcd  
Method Filename : Methode\_Chiral\_MUC\_2.gcm  
Batch Filename : batch\_chiral.gcb  
Vial # : 129  
Injection Volume : 1 uL  
Date Acquired : 27.07.2019 11:47:08  
Date Processed : 29.07.2019 15:40:03

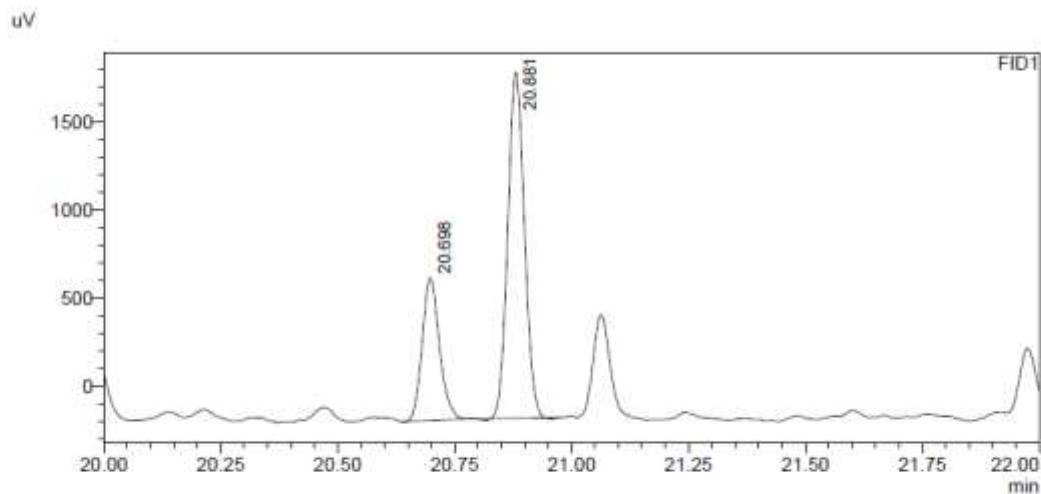

| Peak# | Ret. Time | Area | Area%   |
|-------|-----------|------|---------|
| 1     | 20.698    | 2075 | 30.037  |
| 2     | 20.881    | 4834 | 69.963  |
| Total |           | 6909 | 100.000 |

t = 11 h

Sample Name : t=11\_SOD\_790  
Sample ID :  
Data Filename : t=11\_SOD\_790.gcd  
Method Filename : Methode\_Chiral\_MUC\_2.gcm  
Batch Filename : batch\_chiral.gcb  
Vial # : 135  
Injection Volume : 1 uL  
Date Acquired : 27.07.2019 16:34:20  
Date Processed : 29.07.2019 15:52:01

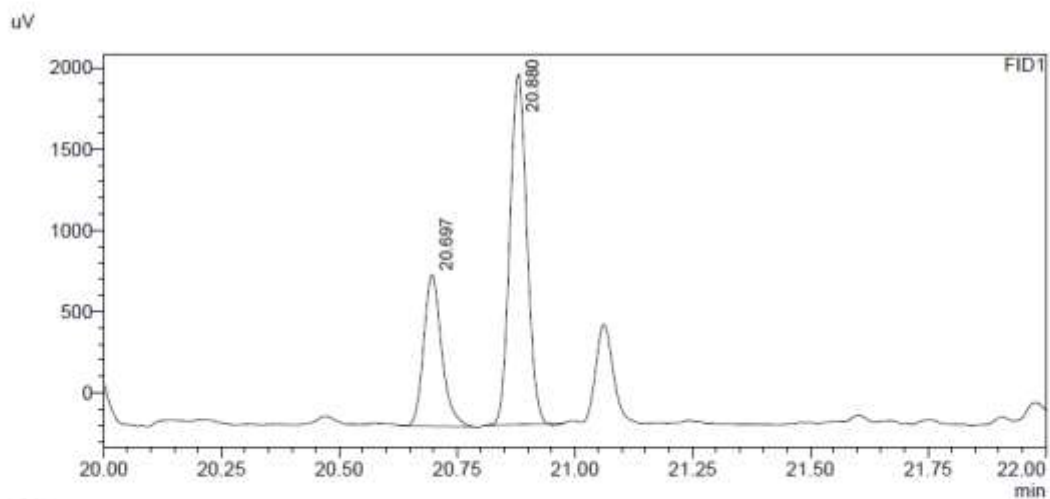

| Peak# | Ret. Time | Area | Area%   |
|-------|-----------|------|---------|
| 1     | 20.697    | 2473 | 31.347  |
| 2     | 20.880    | 5416 | 68.653  |
| Total |           | 7889 | 100.000 |

t = 24 h

Sample Name : t=24\_SOD\_790  
Sample ID :  
Data Filename : t=24\_SOD\_790.gcd  
Method Filename : Methode\_Chiral\_MUC\_2.gcm  
Batch Filename : batch\_chiral.gcb  
Vial # : 141  
Injection Volume : 1 uL  
Date Acquired : 27.07.2019 21:21:13  
Date Processed : 29.07.2019 15:56:19

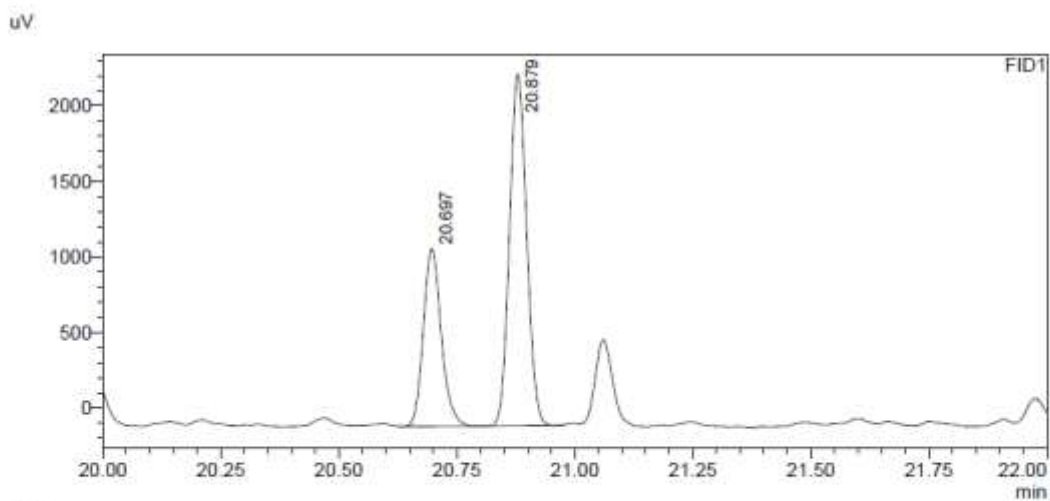

FID1

| Peak# | Ret. Time | Area | Area%   |
|-------|-----------|------|---------|
| 1     | 20.697    | 3107 | 34.630  |
| 2     | 20.879    | 5865 | 65.370  |
| Total |           | 8973 | 100.000 |



t = 48 h

Sample Name : t=48\_SOD\_790  
Sample ID :  
Data Filename : t=48\_SOD\_790.gcd  
Method Filename : Methode\_Chiral\_MUC\_2.gcm  
Batch Filename : batch\_chiral.gcb  
Vial # : 147  
Injection Volume : 1 uL  
Date Acquired : 28.07.2019 02:08:03  
Date Processed : 29.07.2019 16:00:29

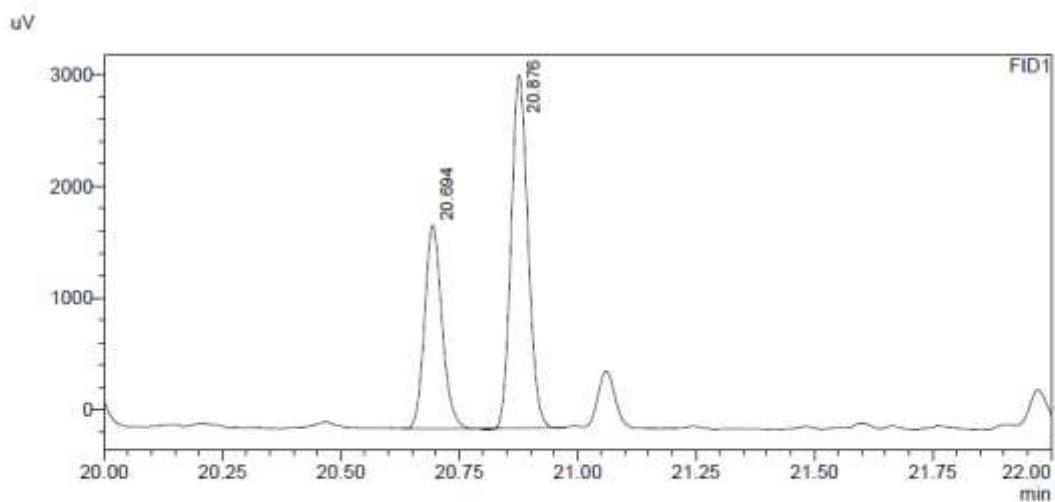

FID1

| Peak# | Ret. Time | Area  | Area%   |
|-------|-----------|-------|---------|
| 1     | 20.694    | 4658  | 37.421  |
| 2     | 20.876    | 7790  | 62.579  |
| Total |           | 12449 | 100.000 |

t = 72 h

Sample Name : t=72\_SOD\_790  
Sample ID :  
Data Filename : t=72\_SOD\_790.gcd  
Method Filename : Methode\_Chiral\_MUC\_2.gcm  
Batch Filename : batch\_chiral.gcb  
Vial # : 3  
Injection Volume : 1 uL  
Date Acquired : 28.07.2019 06:54:57  
Date Processed : 29.07.2019 16:05:24

uV

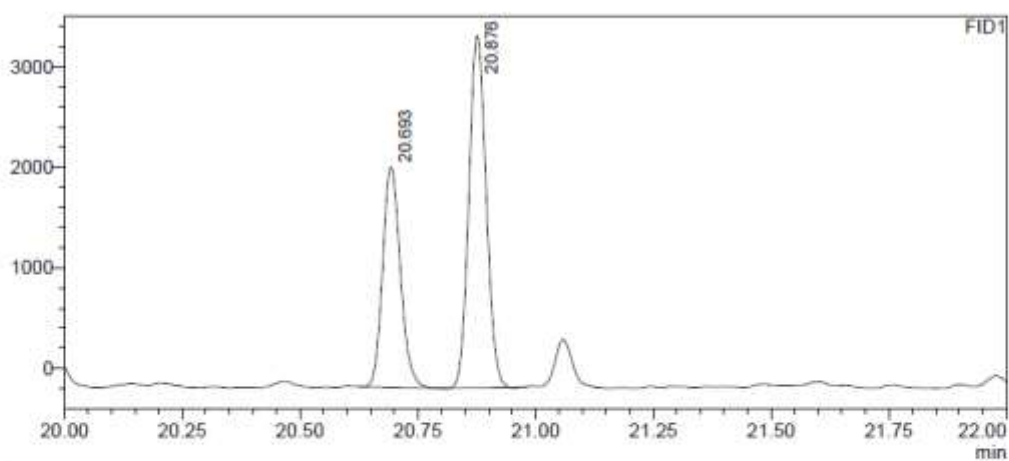

FID1

| Peak# | Ret. Time | Area  | Area%   |
|-------|-----------|-------|---------|
| 1     | 20.693    | 5730  | 39.173  |
| 2     | 20.876    | 8897  | 60.827  |
| Total |           | 14628 | 100.000 |

No I, no *i*PrOH

t = 15 min

Sample Name : t=0.25\_SOD\_791  
Sample ID :  
Data Filename : t=0.25\_SOD\_791.gcd  
Method Filename : Methode\_Chiral\_MUC\_2.gcm  
Batch Filename : batch\_chiral.gcb  
Vial # : 40  
Injection Volume : 1 uL  
Date Acquired : 24.07.2019 00:33:23  
Date Processed : 29.07.2019 14:07:57

uV

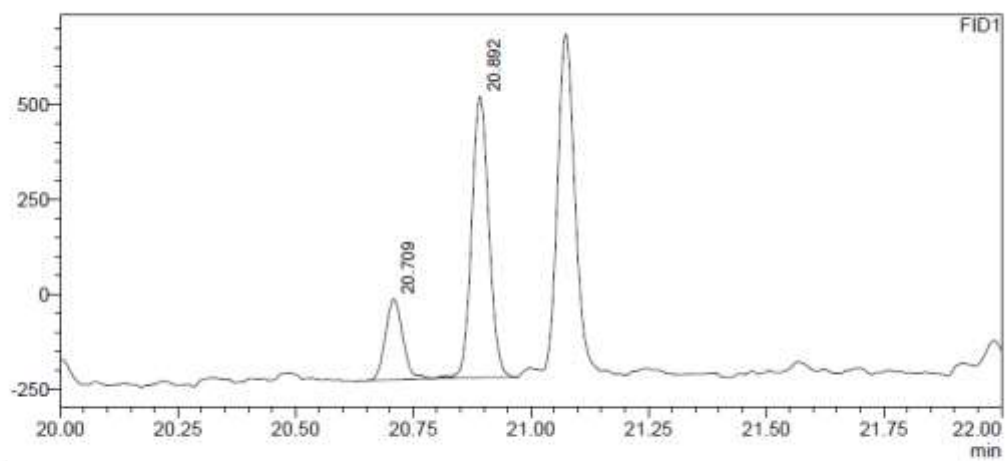

FID1

| Peak# | Ret. Time | Area | Area%   |
|-------|-----------|------|---------|
| 1     | 20.709    | 544  | 22.427  |
| 2     | 20.892    | 1883 | 77.573  |
| Total |           | 2428 | 100.000 |

t = 30min

Sample Name : t=0,5\_SOD\_791  
Sample ID :  
Data Filename : t=0,5\_SOD\_791.gcd  
Method Filename : Methode\_Chiral\_MUC\_2.gcm  
Batch Filename : batch\_chiral.gcb  
Vial # : 46  
Injection Volume : 1 uL  
Date Acquired : 24.07.2019 05:20:20  
Date Processed : 29.07.2019 14:25:49

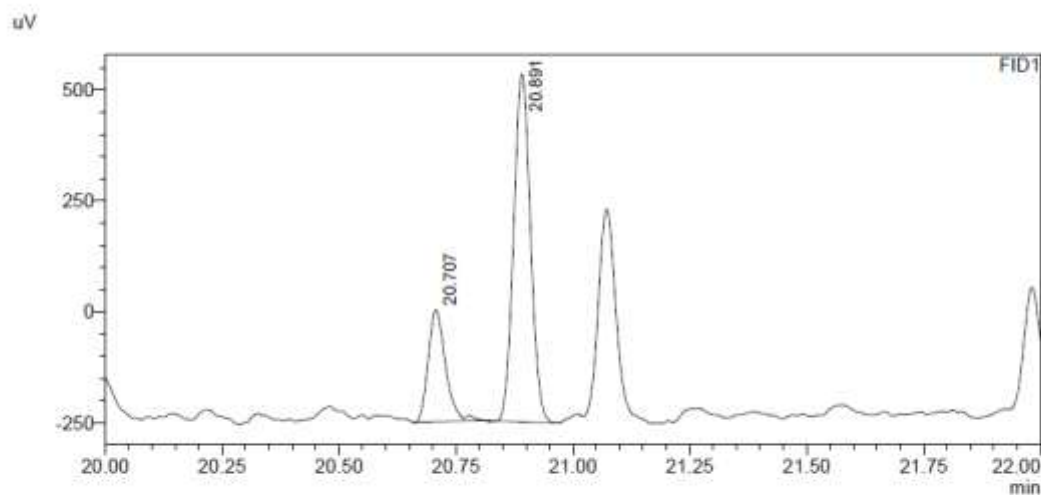

FID1

| Peak# | Ret. Time | Area | Area%   |
|-------|-----------|------|---------|
| 1     | 20.707    | 649  | 24.925  |
| 2     | 20.891    | 1954 | 75.075  |
| Total |           | 2603 | 100.000 |

t = 45 min

Sample Name : t=0,75\_SOD\_791  
Sample ID :  
Data Filename : t=0,75\_SOD\_791.gcd  
Method Filename : Methode\_Chiral\_MUC\_2.gcm  
Batch Filename : batch\_chiral.gcb  
Vial # : 52  
Injection Volume : 1 uL  
Date Acquired : 24.07.2019 10:07:24  
Date Processed : 29.07.2019 14:28:43

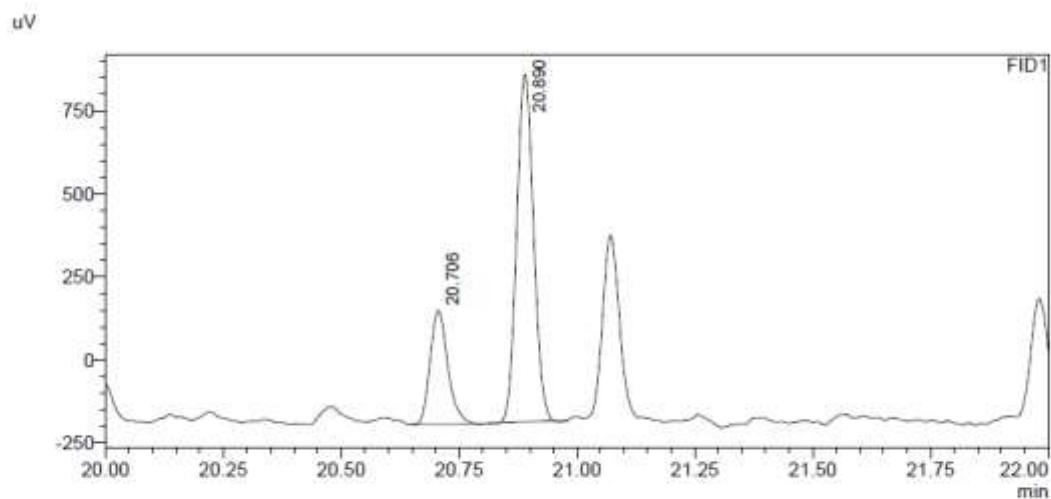

FID1

| Peak# | Ret. Time | Area | Area%   |
|-------|-----------|------|---------|
| 1     | 20.706    | 896  | 25.625  |
| 2     | 20.890    | 2600 | 74.375  |
| Total |           | 3496 | 100.000 |

t = 1 h

Sample Name : t=1\_SOD\_791  
Sample ID :  
Data Filename : t=1\_SOD\_791.gcd  
Method Filename : Methode\_Chiral\_MUC\_2.gcm  
Batch Filename : batch\_chiral.gcb  
Vial # : 58  
Injection Volume : 1 uL  
Date Acquired : 24.07.2019 15:42:29  
Date Processed : 29.07.2019 14:32:23

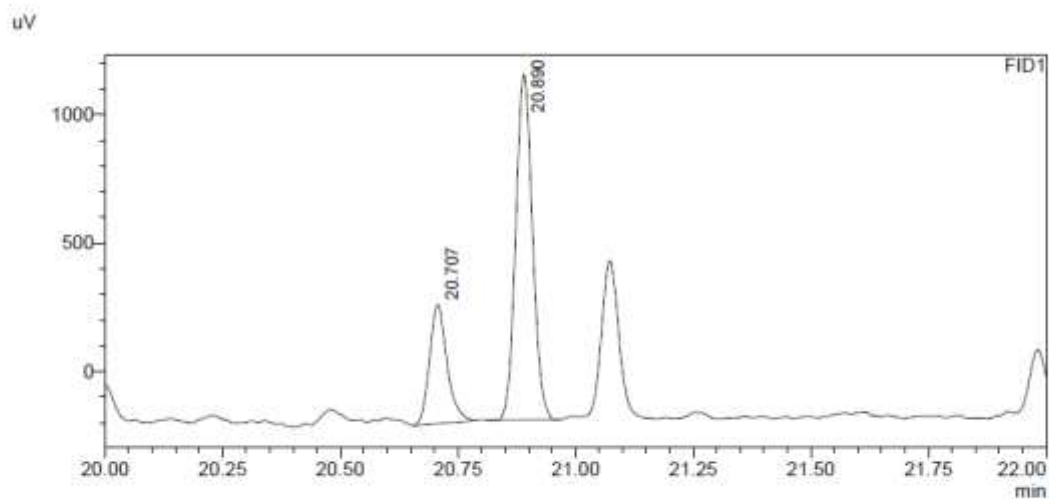

FID1

| Peak# | Ret. Time | Area | Area%   |
|-------|-----------|------|---------|
| 1     | 20.707    | 1199 | 26.470  |
| 2     | 20.890    | 3330 | 73.530  |
| Total |           | 4529 | 100.000 |

t = 1.5 h

Sample Name : t=1,5\_SOD\_791  
Sample ID :  
Data Filename : t=1,5\_SOD\_791.gcd  
Method Filename : Methode\_Chiral\_MUC\_2.gcm  
Batch Filename : batch\_chiral.gcb  
Vial # : 64  
Injection Volume : 1 uL  
Date Acquired : 24.07.2019 22:05:29  
Date Processed : 29.07.2019 14:34:50

uV

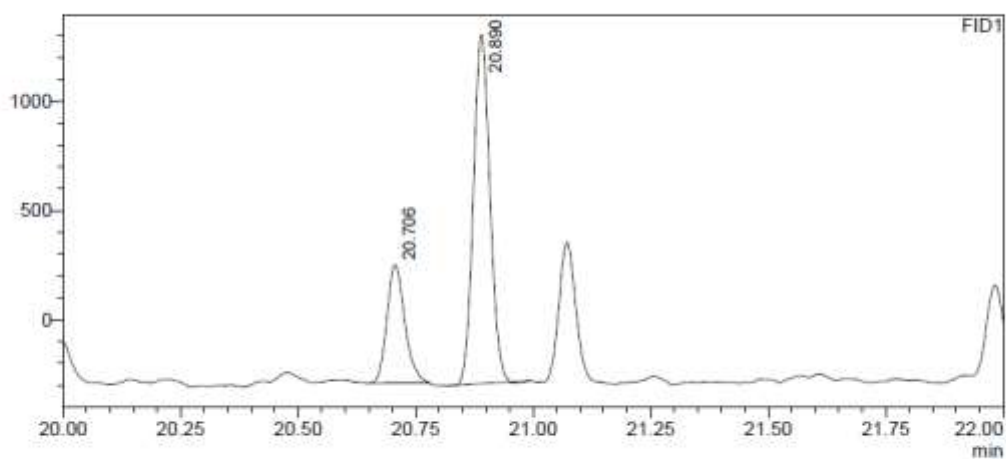

FID1

| Peak# | Ret. Time | Area | Area%   |
|-------|-----------|------|---------|
| 1     | 20.706    | 1434 | 26.934  |
| 2     | 20.890    | 3889 | 73.066  |
| Total |           | 5323 | 100.000 |

t = 2 h

Sample Name : t=2\_SOD\_791  
Sample ID :  
Data Filename : t=2\_SOD\_791.gcd  
Method Filename : Methode\_Chiral\_MUC\_2.gcm  
Batch Filename : batch\_chiral.gcb  
Vial # : 70  
Injection Volume : 1 uL  
Date Acquired : 25.07.2019 02:52:35  
Date Processed : 29.07.2019 14:38:05

uV

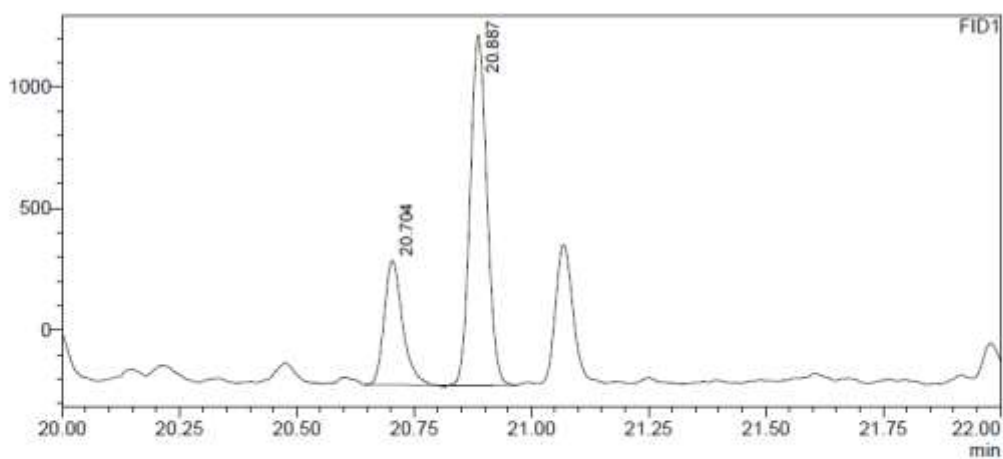

| Peak# | Ret. Time | Area | Area%   |
|-------|-----------|------|---------|
| 1     | 20.704    | 1389 | 27.974  |
| 2     | 20.887    | 3575 | 72.026  |
| Total |           | 4964 | 100.000 |



t = 2.5 h

Sample Name : t=2.5\_SOD\_791  
Sample ID :  
Data Filename : t=2.5\_SOD\_791.gcd  
Method Filename : Methode\_Chiral\_MUC\_2.gcm  
Batch Filename : batch\_chiral.gcb  
Vial # : 76  
Injection Volume : 1 uL  
Date Acquired : 25.07.2019 07:39:36  
Date Processed : 29.07.2019 14:41:08

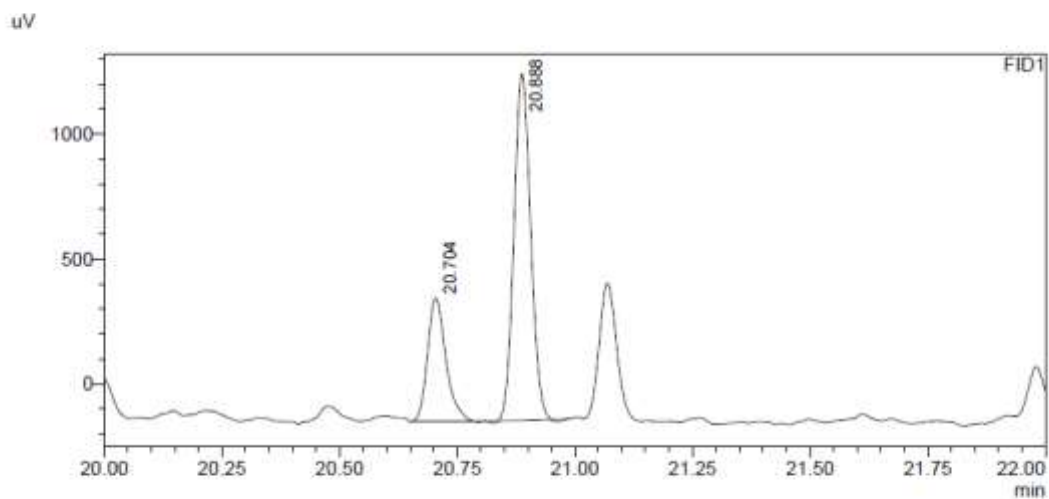

FID1

| Peak# | Ret. Time | Area | Area%   |
|-------|-----------|------|---------|
| 1     | 20.704    | 1328 | 28.058  |
| 2     | 20.888    | 3405 | 71.942  |
| Total |           | 4733 | 100.000 |

t = 3 h

Sample Name : t=3\_SOD\_791  
Sample ID :  
Data Filename : t=3\_SOD\_791.gcd  
Method Filename : Methode\_Chiral\_MUC\_2.gcm  
Batch Filename : batch\_chiral.gcb  
Vial # : 82  
Injection Volume : 1 uL  
Date Acquired : 25.07.2019 12:26:51  
Date Processed : 29.07.2019 14:43:33

uV

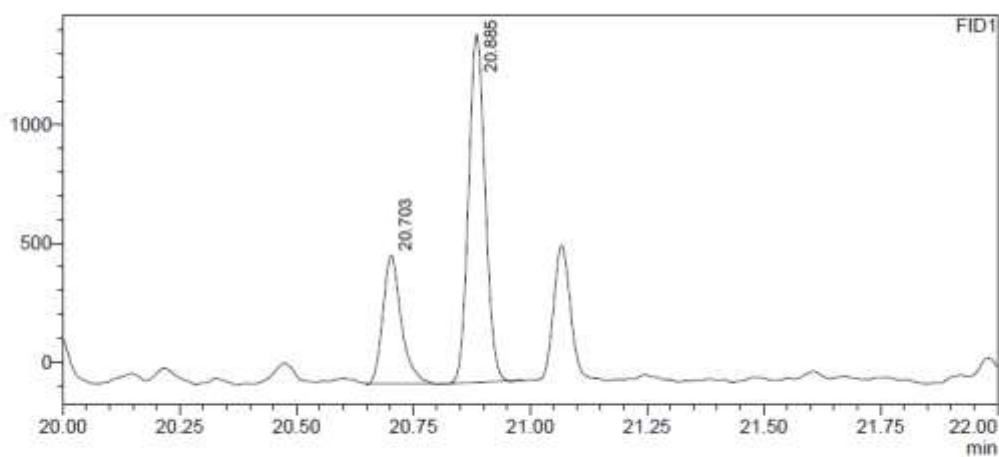

| Peak# | Ret. Time | Area | Area%   |
|-------|-----------|------|---------|
| 1     | 20.703    | 1475 | 28.855  |
| 2     | 20.885    | 3637 | 71.145  |
| Total |           | 5112 | 100.000 |

t = 3.5 h

Sample Name : t=3,5\_SOD\_791  
Sample ID :  
Data Filename : t=3,5\_SOD\_791.gcd  
Method Filename : Methode\_Chiral\_MUC\_2.gcm  
Batch Filename : batch\_chiral.gcb  
Vial # : 88  
Injection Volume : 1 uL  
Date Acquired : 25.07.2019 21:45:40  
Date Processed : 29.07.2019 14:46:18

uV

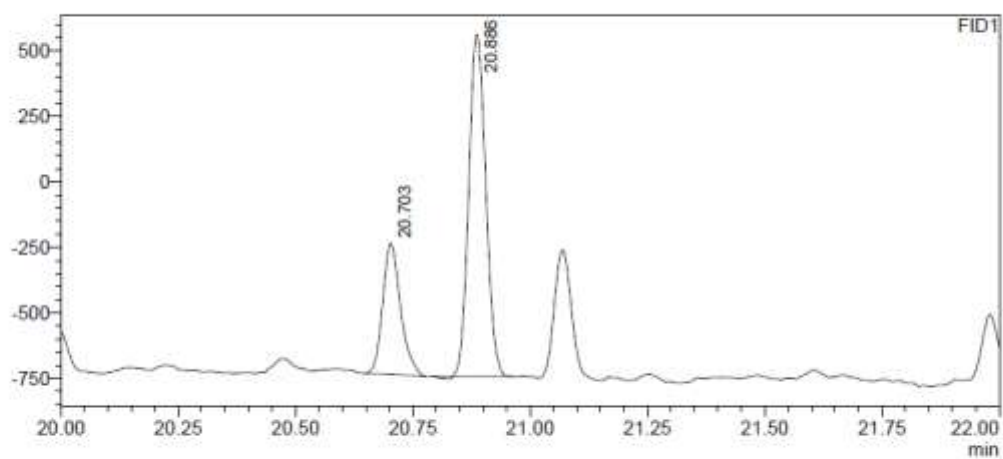

FID1

| Peak# | Ret. Time | Area | Area%   |
|-------|-----------|------|---------|
| 1     | 20.703    | 1327 | 28.864  |
| 2     | 20.886    | 3271 | 71.136  |
| Total |           | 4598 | 100.000 |

t = 4 h

Sample Name : t=4\_SOD\_791  
Sample ID :  
Data Filename : t=4\_SOD\_791.gcd  
Method Filename : Methode\_Chiral\_MUC\_2.gcm  
Batch Filename : batch\_chiral.gcb  
Vial # : 94  
Injection Volume : 1 uL  
Date Acquired : 26.07.2019 03:20:40  
Date Processed : 29.07.2019 14:55:57

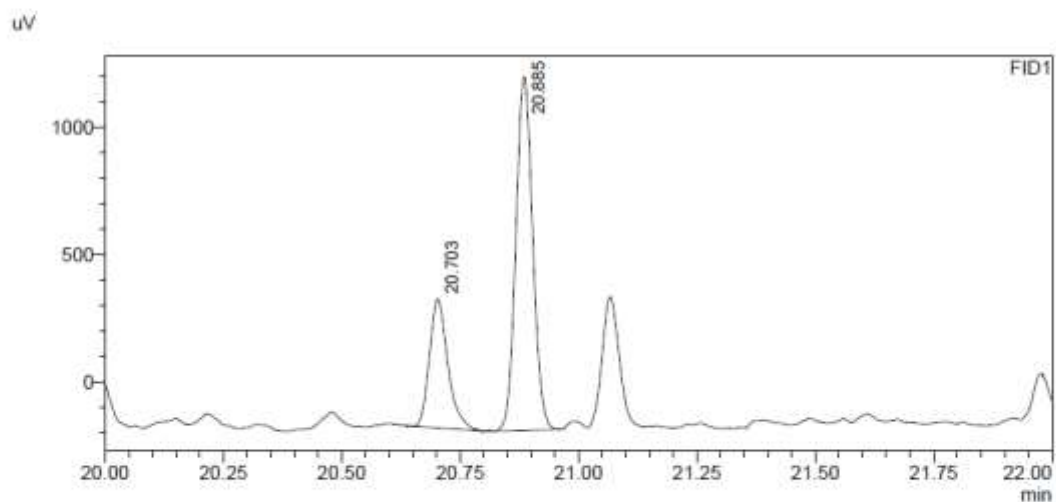

FID1

| Peak# | Ret. Time | Area | Area%   |
|-------|-----------|------|---------|
| 1     | 20.703    | 1364 | 28.422  |
| 2     | 20.885    | 3436 | 71.578  |
| Total |           | 4800 | 100.000 |

t = 5 h

Sample Name : t=5\_SOD\_791  
Sample ID :  
Data Filename : t=5\_SOD\_791.gcd  
Method Filename : Methode\_Chiral\_MUC\_2.gcm  
Batch Filename : batch\_chiral.gcb  
Vial # : 100  
Injection Volume : 1 uL  
Date Acquired : 28.07.2019 11:03:38  
Date Processed : 29.07.2019 14:57:54

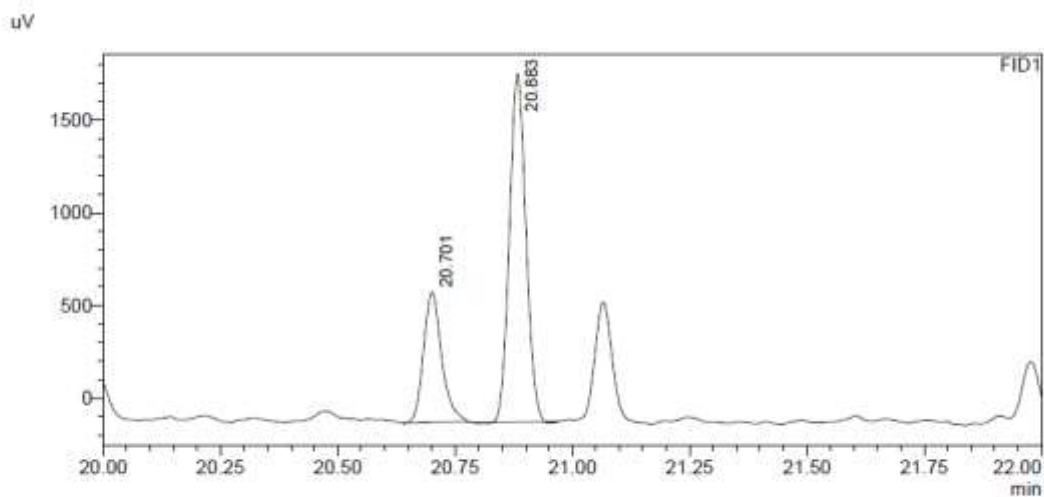

| Peak# | Ret. Time | Area | Area%   |
|-------|-----------|------|---------|
| 1     | 20.701    | 1904 | 29.318  |
| 2     | 20.883    | 4591 | 70.682  |
| Total |           | 6496 | 100.000 |

t = 6 h

Sample Name : t=6\_SOD\_791  
Sample ID :  
Data Filename : t=6\_SOD\_791.gcd  
Method Filename : Methode\_Chiral\_MUC\_2.gcm  
Batch Filename : batch\_chiral.gcb  
Vial # : 106  
Injection Volume : 1 uL  
Date Acquired : 26.07.2019 16:38:45  
Date Processed : 29.07.2019 15:29:26

uV

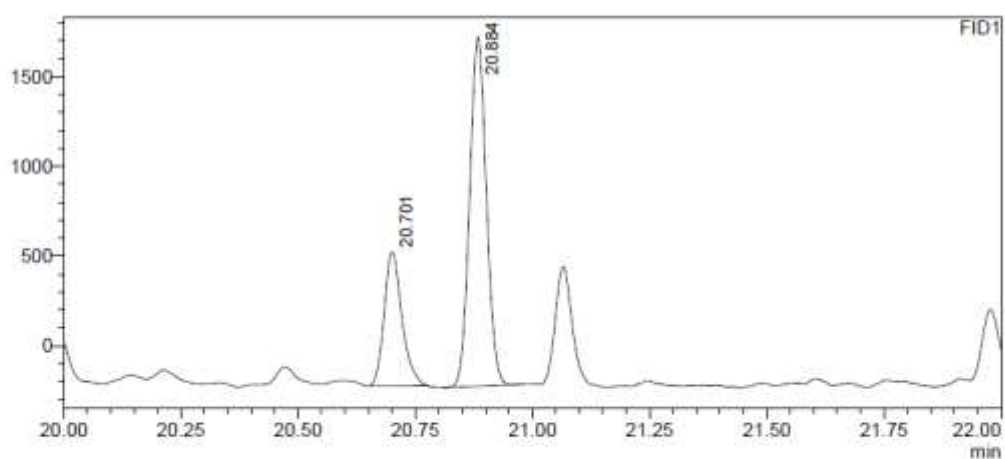

| Peak# | Ret. Time | Area | Area%   |
|-------|-----------|------|---------|
| 1     | 20.701    | 1957 | 28.880  |
| 2     | 20.884    | 4819 | 71.120  |
| Total |           | 6776 | 100.000 |

t = 7 h

Sample Name : t=7\_SOD\_791  
Sample ID :  
Data Filename : t=7\_SOD\_791.gcd  
Method Filename : Methode\_Chiral\_MUC\_2.gcm  
Batch Filename : batch\_chiral.gcb  
Vial # : 112  
Injection Volume : 1 uL  
Date Acquired : 26.07.2019 22:13:57  
Date Processed : 29.07.2019 15:32:31

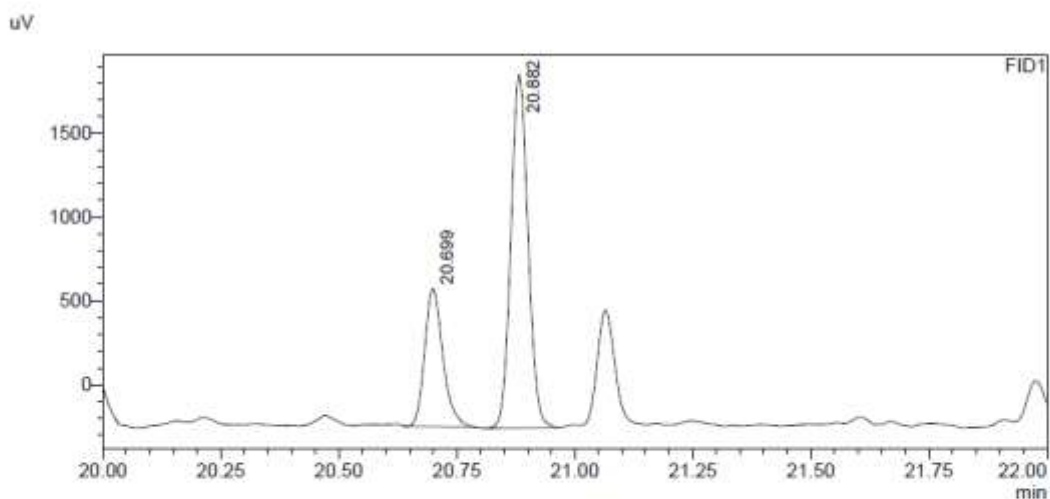

FID1

| Peak# | Ret. Time | Area | Area%   |
|-------|-----------|------|---------|
| 1     | 20.699    | 2205 | 29.305  |
| 2     | 20.882    | 5319 | 70.695  |
| Total |           | 7524 | 100.000 |

t = 8 h

Sample Name : t=8\_SOD\_791  
Sample ID :  
Data Filename : t=8\_SOD\_791.gcd  
Method Filename : Methode\_Chiral\_MUC\_2.gcm  
Batch Filename : batch\_chiral.gcb  
Vial # : 118  
Injection Volume : 1 uL  
Date Acquired : 27.07.2019 03:01:08  
Date Processed : 29.07.2019 15:35:00

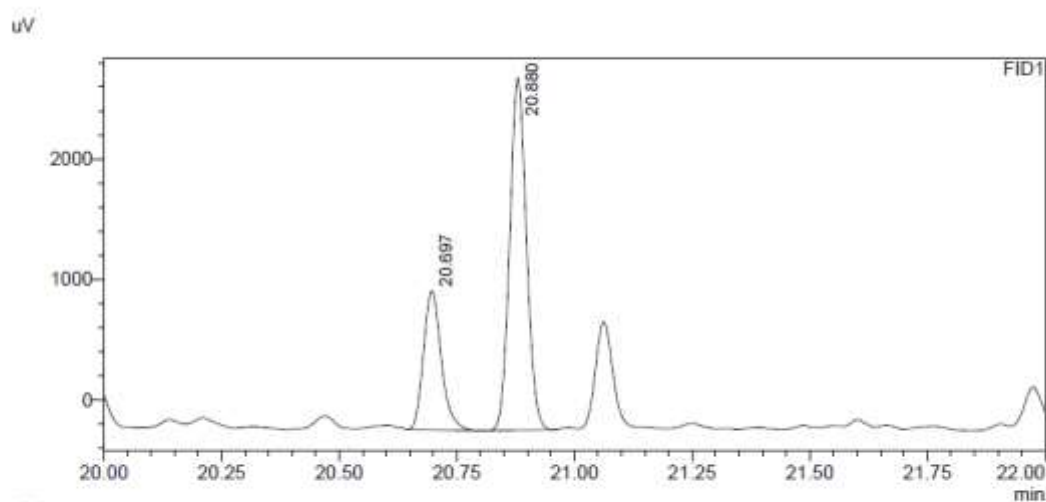

FID1

| Peak# | Ret. Time | Area  | Area%   |
|-------|-----------|-------|---------|
| 1     | 20.697    | 3036  | 29.624  |
| 2     | 20.880    | 7212  | 70.376  |
| Total |           | 10248 | 100.000 |



t = 9 h

Sample Name : t-9\_SOD\_791  
Sample ID :  
Data Filename : t-9\_SOD\_791.gcd  
Method Filename : Methode\_Chiral\_MUC\_2.gcm  
Batch Filename : batch\_chiral.gcb  
Vial # : 124  
Injection Volume : 1 uL  
Date Acquired : 27.07.2019 07:48:02  
Date Processed : 29.07.2019 15:37:44

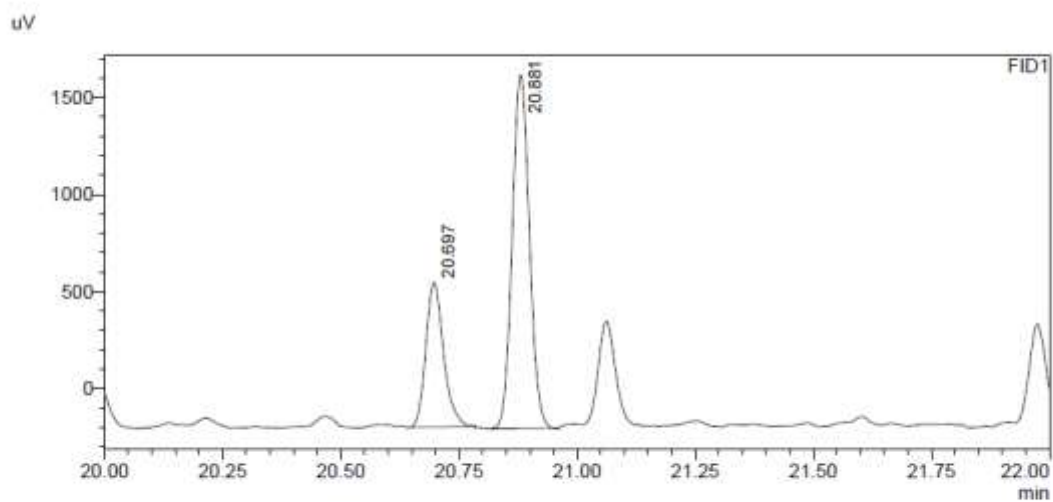

FID1

| Peak# | Ret. Time | Area | Area%   |
|-------|-----------|------|---------|
| 1     | 20.697    | 1946 | 29.729  |
| 2     | 20.881    | 4599 | 70.271  |
| Total |           | 6544 | 100.000 |

t = 10 h

Sample Name : t=10\_SOD\_791  
Sample ID :  
Data Filename : t=10\_SOD\_791.gcd  
Method Filename : Methode\_Chiral\_MUC\_2.gcm  
Batch Filename : batch\_chiral.gcb  
Vial # : 130  
Injection Volume : 1 uL  
Date Acquired : 27.07.2019 12:35:04  
Date Processed : 29.07.2019 15:49:43

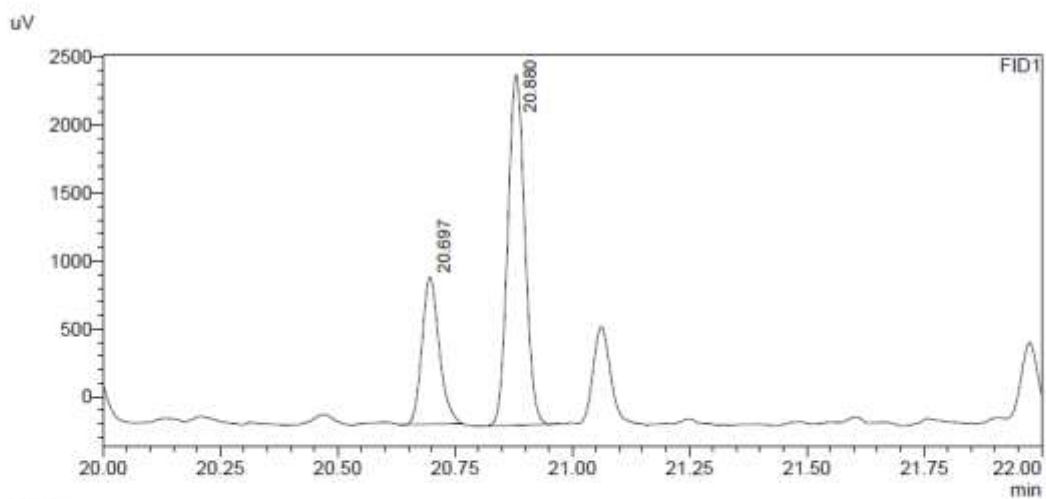

FID1

| Peak# | Ret. Time | Area | Area%   |
|-------|-----------|------|---------|
| 1     | 20.697    | 2766 | 29.827  |
| 2     | 20.880    | 6507 | 70.173  |
| Total |           | 9273 | 100.000 |

t = 11 h

Sample Name : t=11\_SOD\_791  
Sample ID :  
Data Filename : t=11\_SOD\_791.gcd  
Method Filename : Methode\_Chiral\_MUC\_2.gcm  
Batch Filename : batch\_chiral.gcb  
Vial # : 136  
Injection Volume : 1 uL  
Date Acquired : 27.07.2019 17:22:13  
Date Processed : 29.07.2019 15:52:27

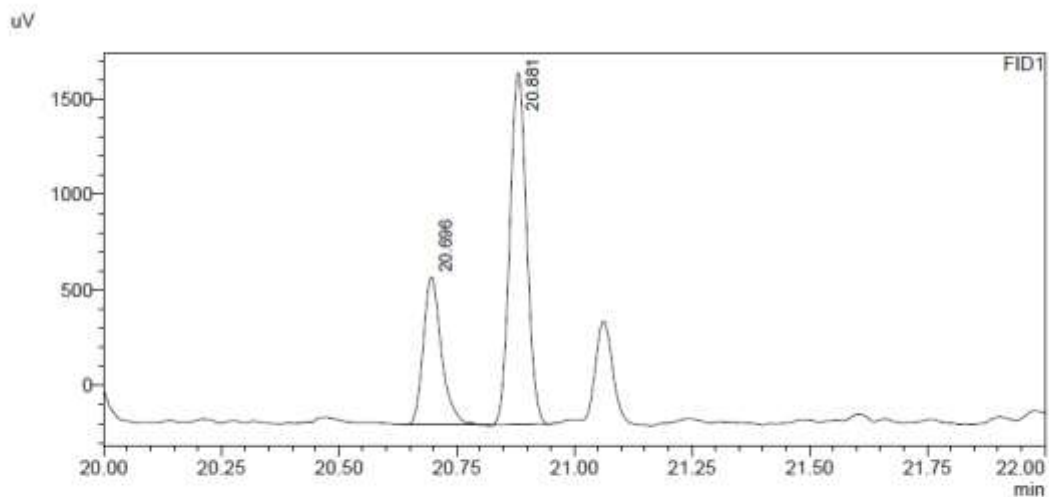

FID1

| Peak# | Ret. Time | Area | Area%   |
|-------|-----------|------|---------|
| 1     | 20.696    | 2063 | 31.122  |
| 2     | 20.881    | 4565 | 68.878  |
| Total |           | 6628 | 100.000 |

t = 24 h

Sample Name : t=24\_SOD\_791  
Sample ID :  
Data Filename : t=24\_SOD\_791.gcd  
Method Filename : Methode\_Chiral\_MUC\_2.gcm  
Batch Filename : batch\_chiral.gcb  
Vial # : 142  
Injection Volume : 1 uL  
Date Acquired : 27.07.2019 22:09:00  
Date Processed : 29.07.2019 15:56:45

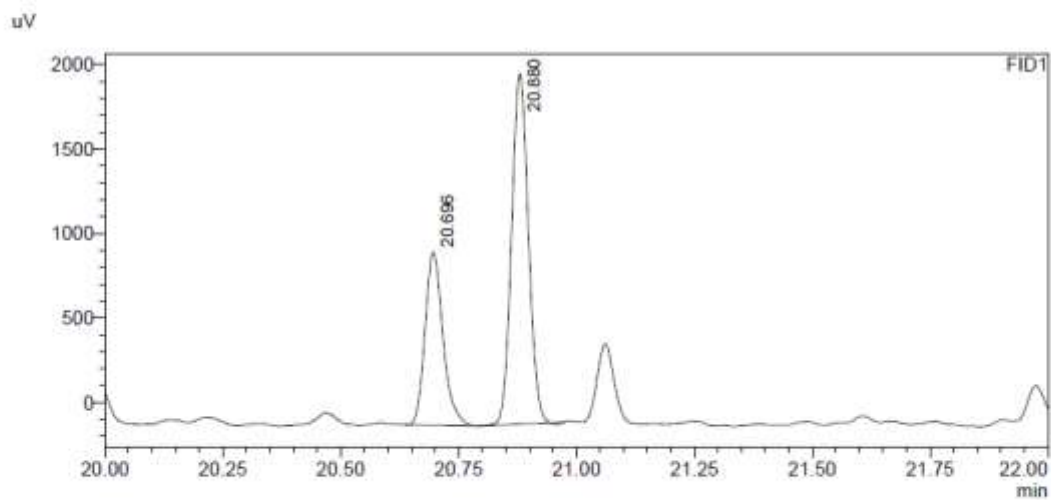

| Peak# | Ret. Time | Area | Area%   |
|-------|-----------|------|---------|
| 1     | 20.696    | 2712 | 34.604  |
| 2     | 20.880    | 5125 | 65.396  |
| Total |           | 7837 | 100.000 |

t = 48 h

Sample Name : t=48\_SOD\_791  
Sample ID :  
Data Filename : t=48\_SOD\_791.gcd  
Method Filename : Methode\_Chiral\_MUC\_2.gcm  
Batch Filename : batch\_chiral.gcb  
Vial # : 148  
Injection Volume : 1 uL  
Date Acquired : 28.07.2019 02:55:54  
Date Processed : 29.07.2019 16:00:53

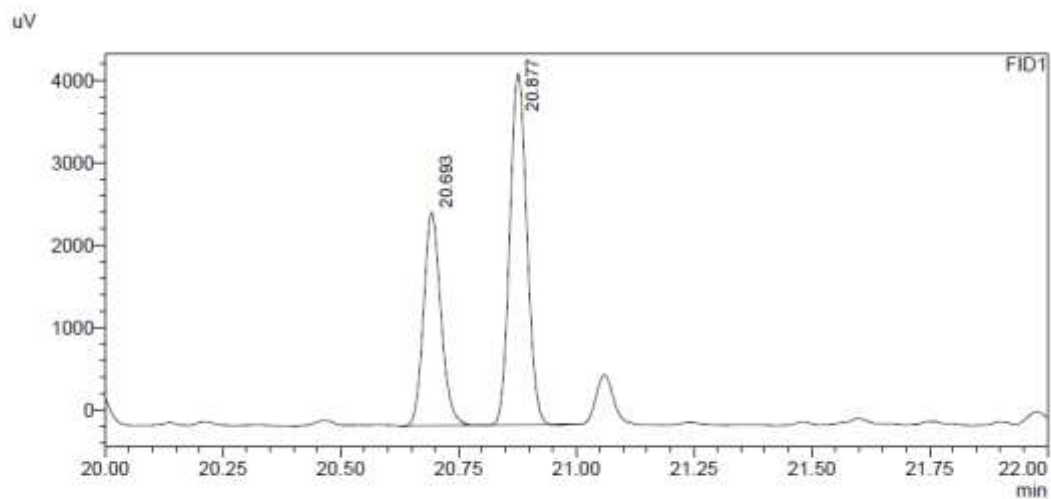

| Peak# | Ret. Time | Area  | Area%   |
|-------|-----------|-------|---------|
| 1     | 20.693    | 6636  | 38.213  |
| 2     | 20.877    | 10730 | 61.787  |
| Total |           | 17366 | 100.000 |

t = 72 h

Sample Name : t=72\_SOD\_791  
Sample ID :  
Data Filename : t=72\_SOD\_791.gcd  
Method Filename : Methode\_Chiral\_MUC\_2.gcm  
Batch Filename : batch\_chiral.gcb  
Vial # : 4  
Injection Volume : 1 uL  
Date Acquired : 28.07.2019 07:42:40  
Date Processed : 29.07.2019 16:06:26

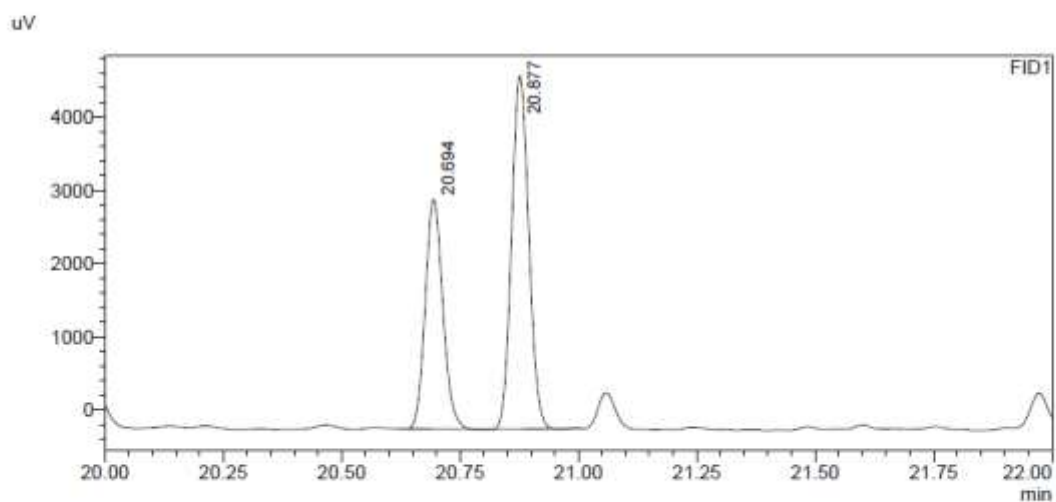

| Peak# | Ret. Time | Area  | Area%   |
|-------|-----------|-------|---------|
| 1     | 20.694    | 8103  | 39.974  |
| 2     | 20.877    | 12168 | 60.026  |
| Total |           | 20271 | 100.000 |

## 2.8 Chiral GC spectra for Table 2 of the Manuscript (reactions with different substrates)

### Entry 1

I, *i*PrOH

Sample Name : t=72\_SOD\_485  
Sample ID :  
Data Filename : t=72\_SOD\_485.gcd  
Method Filename : Methode\_Chiral\_MUC\_2.gcm  
Batch Filename : batch\_chiral.gcb  
Vial # : 88  
Injection Volume : 1 uL  
Date Acquired : 26.01.2019 13:51:47  
Date Processed : 26.01.2019 14:34:50

uV

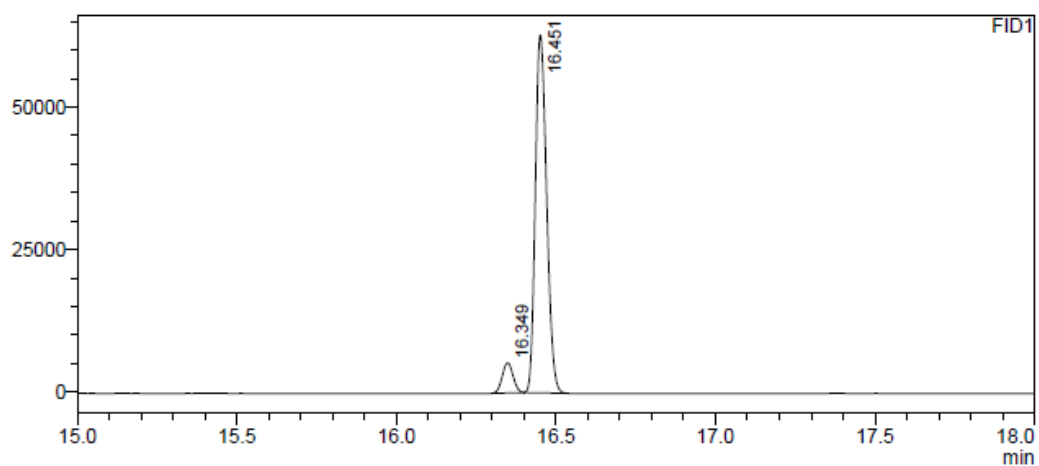

FID1

| Peak# | Ret. Time | Area   | Area%   |
|-------|-----------|--------|---------|
| 1     | 16.349    | 12495  | 7.467   |
| 2     | 16.451    | 154835 | 92.533  |
| Total |           | 167330 | 100.000 |

Sample Name : t=72\_SOD\_657  
Sample ID :  
Data Filename : t=72\_SOD\_657.gcd  
Method Filename : Methode\_Chiral\_MUC\_2.gcm  
Batch Filename : batch\_chiral.gcb  
Vial # : 4  
Injection Volume : 1 uL  
Date Acquired : 28.03.2019 20:02:52  
Date Processed : 28.03.2019 20:45:57

uV

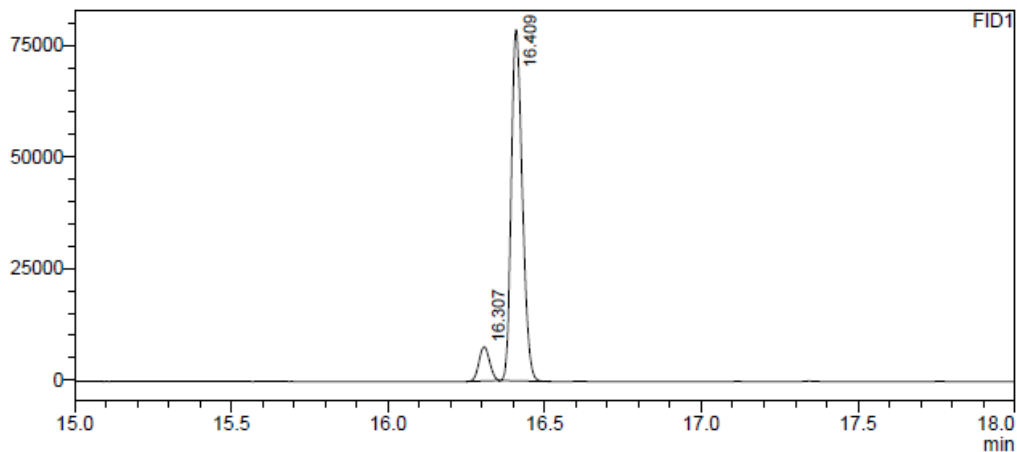

FID1

| Peak# | Ret. Time | Area   | Area%   |
|-------|-----------|--------|---------|
| 1     | 16.307    | 18076  | 8.563   |
| 2     | 16.409    | 193008 | 91.437  |
| Total |           | 211084 | 100.000 |



Sample Name : t=72\_SOD-936  
Sample ID :  
Data Filename : t=72\_SOD-936.gcd  
Method Filename : Methode\_Chiral\_MUC\_2.gcm  
Batch Filename : batch\_chiral.gcb  
Vial # : 45  
Injection Volume : 1 uL  
Date Acquired : 29.01.2020 00:07:17  
Date Processed : 30.01.2020 08:21:49

uV

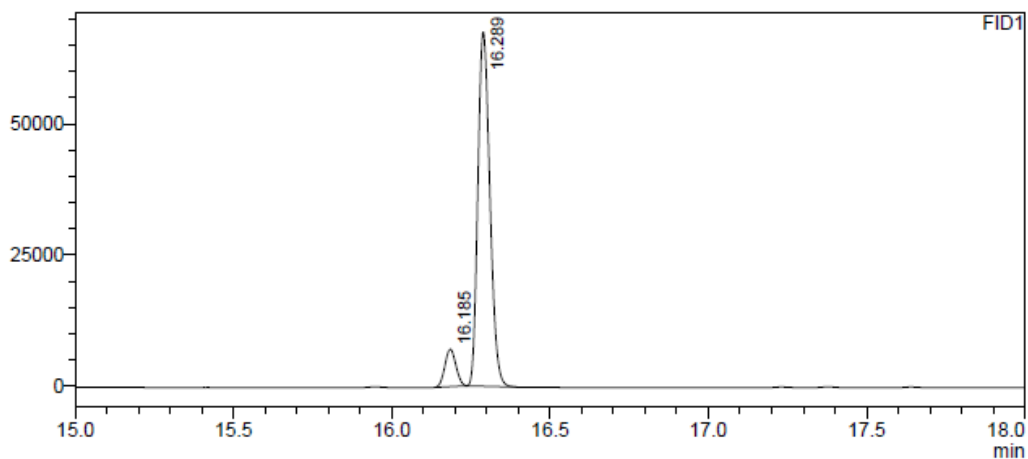

FID1

| Peak# | Ret. Time | Area   | Area%   |
|-------|-----------|--------|---------|
| 1     | 16.185    | 17315  | 8.845   |
| 2     | 16.289    | 178449 | 91.155  |
| Total |           | 195763 | 100.000 |

# I, no *i*PrOH

Sample Name : t=72\_SOD\_340  
Sample ID :  
Data Filename : t=72\_SOD\_341.gcd  
Method Filename : Methode\_Chiral\_MUC\_2.gcm  
Batch Filename : batch\_chiral.gcb  
Vial # : 3  
Injection Volume : 1 uL  
Date Acquired : 23.11.2018 19:18:25  
Date Processed : 26.11.2018 18:11:50

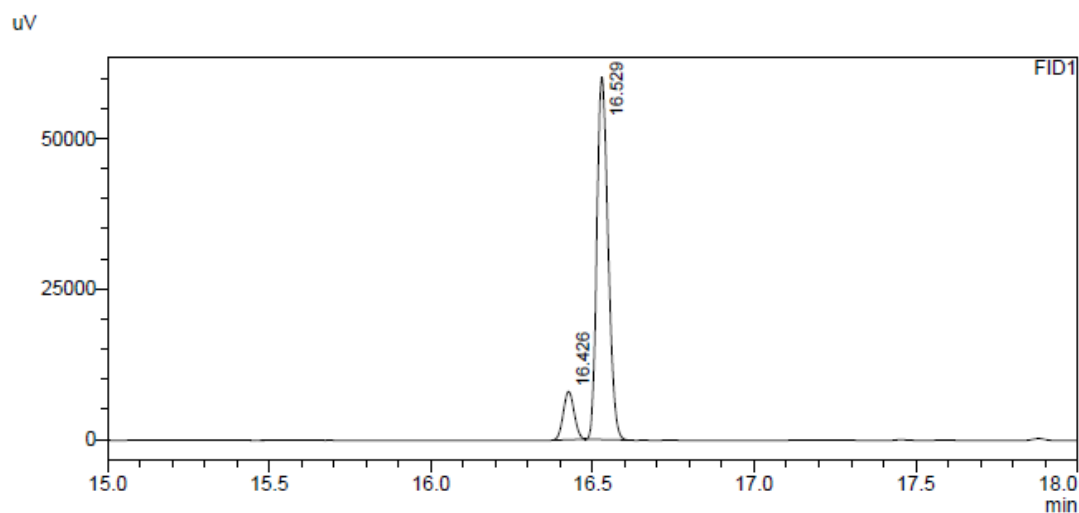

| Peak# | Ret. Time | Area   | Area%   |
|-------|-----------|--------|---------|
| 1     | 16.426    | 18849  | 11.444  |
| 2     | 16.529    | 145860 | 88.556  |
| Total |           | 164708 | 100.000 |

Sample Name : t=72\_SOD\_619  
Sample ID :  
Data Filename : t=72\_SOD\_619.gcd  
Method Filename : Methode\_Chiral\_MUC\_2.gcm  
Batch Filename : batch\_chiral.gcb  
Vial # : 1  
Injection Volume : 1 uL  
Date Acquired : 15.03.2019 17:22:33  
Date Processed : 18.03.2019 11:16:45

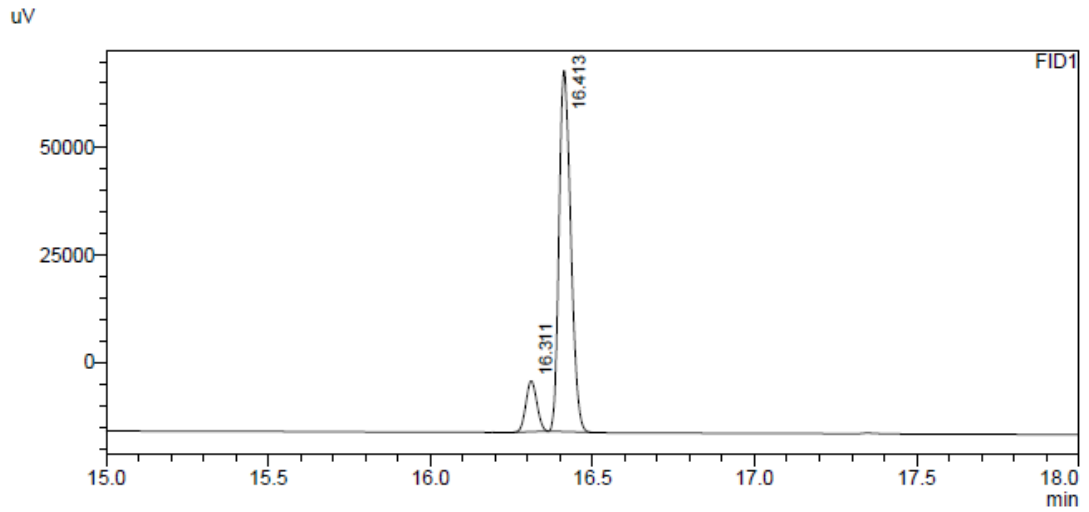

FID1

| Peak# | Ret. Time | Area   | Area%   |
|-------|-----------|--------|---------|
| 1     | 16.311    | 27894  | 11.629  |
| 2     | 16.413    | 211964 | 88.371  |
| Total |           | 239858 | 100.000 |

Sample Name : t=72\_SOD-925  
Sample ID :  
Data Filename : t=72\_SOD-925.gcd  
Method Filename : Methode\_Chiral\_MUC\_2.gcm  
Batch Filename : batch\_chiral.gcb  
Vial # : 34  
Injection Volume : 1 uL  
Date Acquired : 28.01.2020 15:21:29  
Date Processed : 30.01.2020 08:17:42

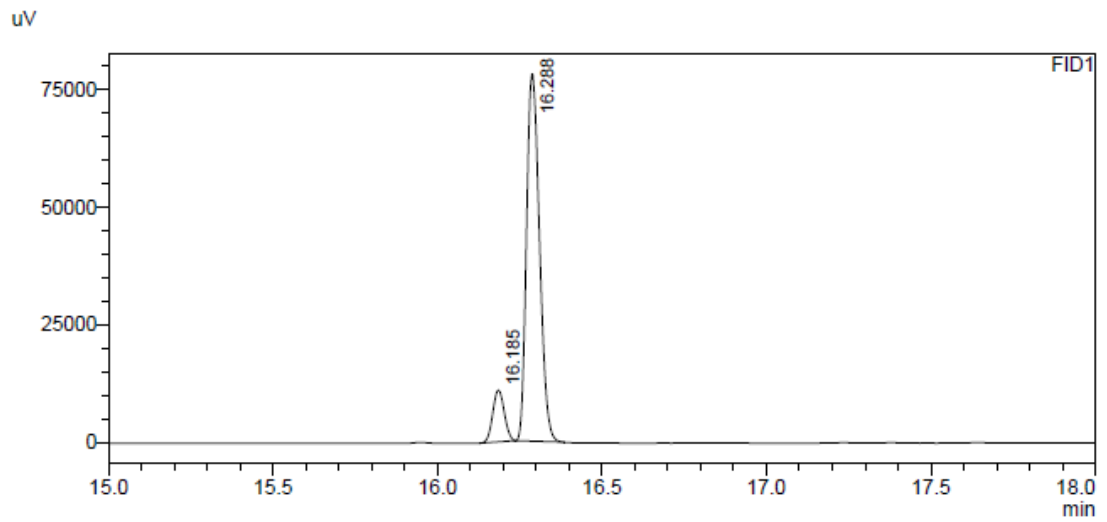

FID1

| Peak# | Ret. Time | Area   | Area%   |
|-------|-----------|--------|---------|
| 1     | 16.185    | 26813  | 11.134  |
| 2     | 16.288    | 214021 | 88.866  |
| Total |           | 240834 | 100.000 |

No I, *i*PrOH

Sample Name : t=72\_SOD-1021  
Sample ID :  
Data Filename : t=72\_SOD-1021.gcd  
Method Filename : Methode\_Chiral\_MUC\_2.gcm  
Batch Filename : batch\_chiral.gcb  
Vial # : 4  
Injection Volume : 1 uL  
Date Acquired : 26.02.2020 17:31:18  
Date Processed : 26.02.2020 18:14:22

uV

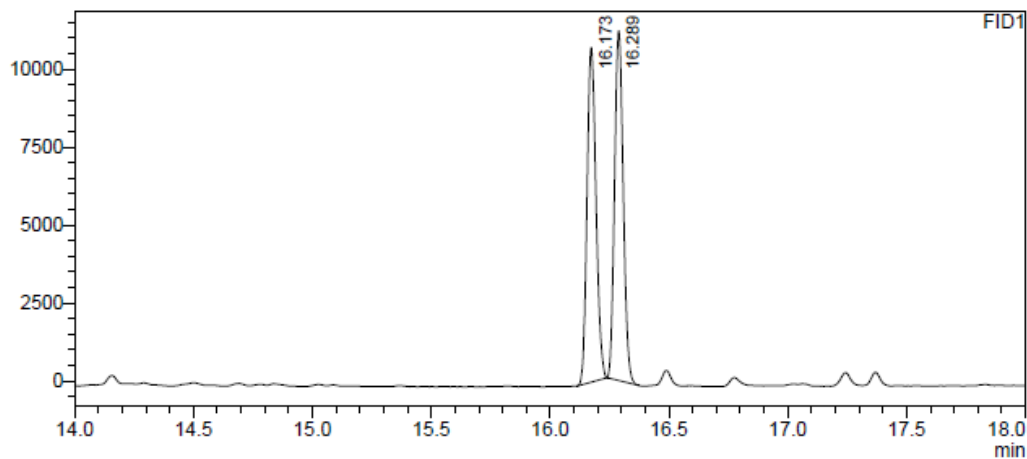

FID1

| Peak# | Ret. Time | Area  | Area%   |
|-------|-----------|-------|---------|
| 1     | 16.173    | 28116 | 49.607  |
| 2     | 16.289    | 28561 | 50.393  |
| Total |           | 56676 | 100.000 |

Sample Name : t=72\_SOD-1022  
Sample ID :  
Data Filename : t=72\_SOD-1022.gcd  
Method Filename : Methode\_Chiral\_MUC\_2.gcm  
Batch Filename : batch\_chiral.gcb  
Vial # : 5  
Injection Volume : 1 uL  
Date Acquired : 26.02.2020 18:18:59  
Date Processed : 26.02.2020 19:02:03

uV

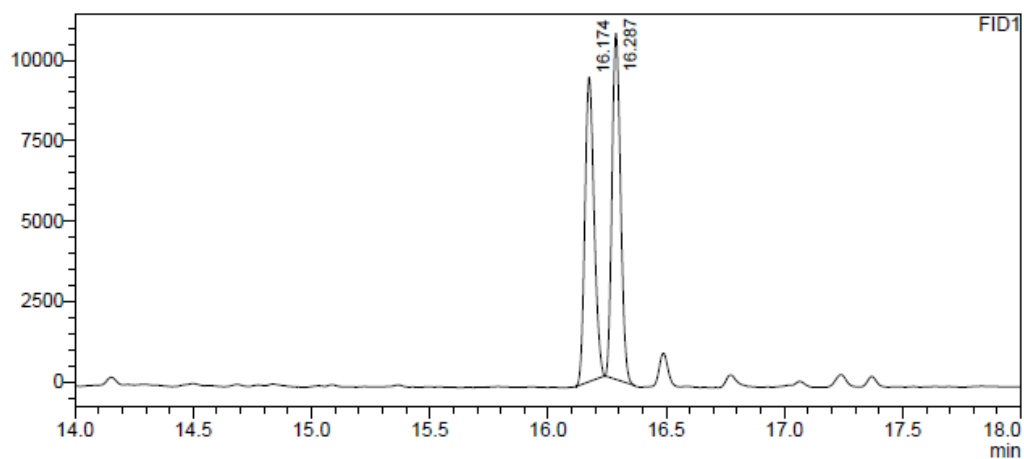

FID1

| Peak# | Ret. Time | Area  | Area%   |
|-------|-----------|-------|---------|
| 1     | 16.174    | 25713 | 48.657  |
| 2     | 16.287    | 27133 | 51.343  |
| Total |           | 52846 | 100.000 |

Sample Name : t=72\_SOD-1023  
Sample ID :  
Data Filename : t=72\_SOD-1023.gcd  
Method Filename : Methode\_Chiral\_MUC\_2.gcm  
Batch Filename : batch\_chiral.gcb  
Vial # : 6  
Injection Volume : 1 uL  
Date Acquired : 26.02.2020 19:06:42  
Date Processed : 26.02.2020 19:49:46

uV

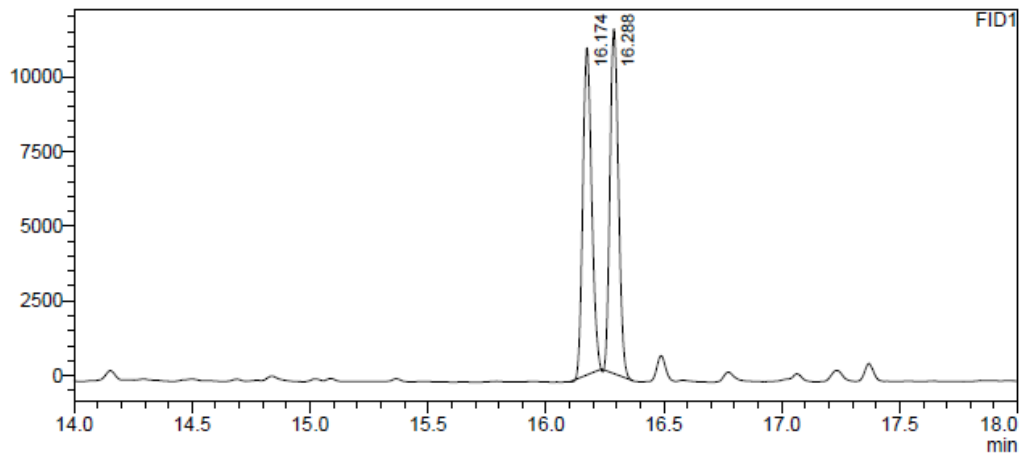

FID1

| Peak# | Ret. Time | Area  | Area%   |
|-------|-----------|-------|---------|
| 1     | 16.174    | 28699 | 49.774  |
| 2     | 16.288    | 28960 | 50.226  |
| Total |           | 57659 | 100.000 |

# No I, no *i*PrOH

Sample Name : t=72\_SOD-1018  
Sample ID :  
Data Filename : t=72\_SOD-1018.gcd  
Method Filename : Methode\_Chiral\_MUC\_2.gcm  
Batch Filename : batch\_chiral.gcb  
Vial # : 1  
Injection Volume : 1 uL  
Date Acquired : 26.02.2020 15:08:00  
Date Processed : 26.02.2020 15:51:05

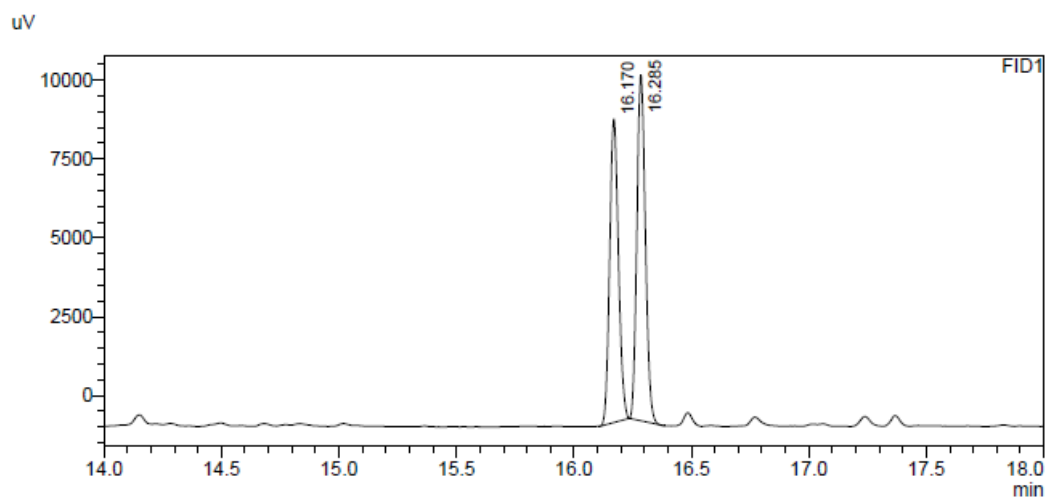

FID1

| Peak# | Ret. Time | Area  | Area%   |
|-------|-----------|-------|---------|
| 1     | 16.170    | 25038 | 47.535  |
| 2     | 16.285    | 27634 | 52.465  |
| Total |           | 52672 | 100.000 |



Sample Name : t=72\_SOD-1019  
Sample ID :  
Data Filename : t=72\_SOD-1019.gcd  
Method Filename : Methode\_Chiral\_MUC\_2.gcm  
Batch Filename : batch\_chiral.gcb  
Vial # : 2  
Injection Volume : 1 uL  
Date Acquired : 26.02.2020 15:55:43  
Date Processed : 26.02.2020 16:38:48

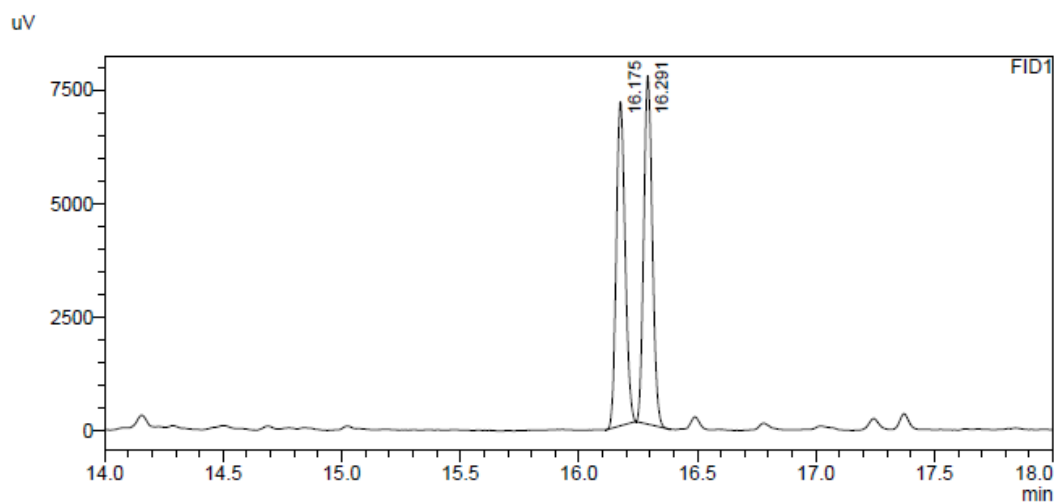

FID1

| Peak# | Ret. Time | Area  | Area%   |
|-------|-----------|-------|---------|
| 1     | 16.175    | 18520 | 48.948  |
| 2     | 16.291    | 19316 | 51.052  |
| Total |           | 37835 | 100.000 |

Sample Name : t=72\_SOD-1020  
Sample ID :  
Data Filename : t=72\_SOD-1020.gcd  
Method Filename : Methode\_Chiral\_MUC\_2.gcm  
Batch Filename : batch\_chiral.gcb  
Vial # : 3  
Injection Volume : 1 uL  
Date Acquired : 26.02.2020 16:43:33  
Date Processed : 26.02.2020 17:26:37

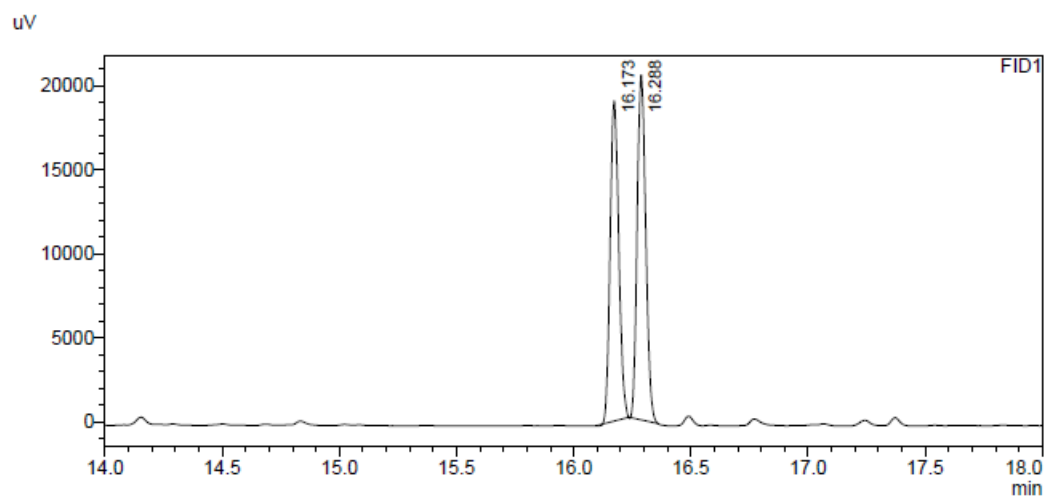

FID1

| Peak# | Ret. Time | Area   | Area%   |
|-------|-----------|--------|---------|
| 1     | 16.173    | 48887  | 48.258  |
| 2     | 16.288    | 52415  | 51.742  |
| Total |           | 101302 | 100.000 |

## Entry 2

I, *i*PrOH

Sample Name : t=72\_SOD\_781  
Sample ID :  
Data Filename : t=72\_SOD\_781.gcd  
Method Filename : Methode\_Chiral\_MUC\_2.gcm  
Batch Filename : batch\_chiral.gcb  
Vial # : 12  
Injection Volume : 1 uL  
Date Acquired : 23.07.2019 02:14:24  
Date Processed : 29.07.2019 16:02:52

uV

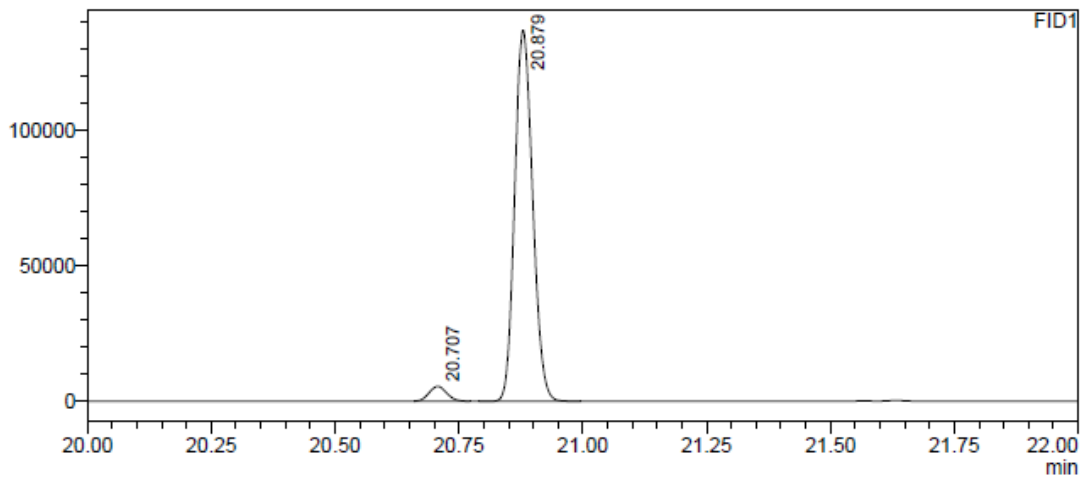

| Peak# | Ret. Time | Area   | Area%   |
|-------|-----------|--------|---------|
| 1     | 20.707    | 13575  | 3.769   |
| 2     | 20.879    | 346573 | 96.231  |
| Total |           | 360148 | 100.000 |

Sample Name : SOD-783\_72  
Sample ID :  
Data Filename : SOD-783\_72.gcd  
Method Filename : Methode\_Chiral\_MUC\_2.gcm  
Batch Filename : batch\_chiral.gcb  
Vial # : 6  
Injection Volume : 1 uL  
Date Acquired : 07.03.2020 15:14:21  
Date Processed : 07.03.2020 15:57:26

uV

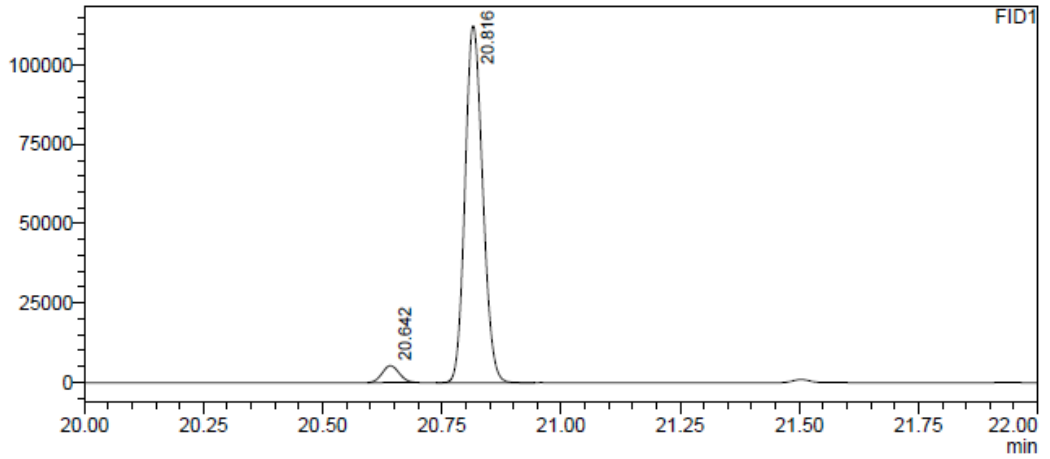

FID1

| Peak# | Ret. Time | Area   | Area%   |
|-------|-----------|--------|---------|
| 1     | 20.642    | 13308  | 4.383   |
| 2     | 20.816    | 290329 | 95.617  |
| Total |           | 303638 | 100.000 |

Sample Name : t=72\_SOD\_785  
Sample ID :  
Data Filename : t=72\_SOD\_785.gcd  
Method Filename : Methode\_Chiral\_MUC\_2.gcm  
Batch Filename : batch\_chiral.gcb  
Vial # : 14  
Injection Volume : 1 uL  
Date Acquired : 23.07.2019 03:49:56  
Date Processed : 29.07.2019 16:04:00

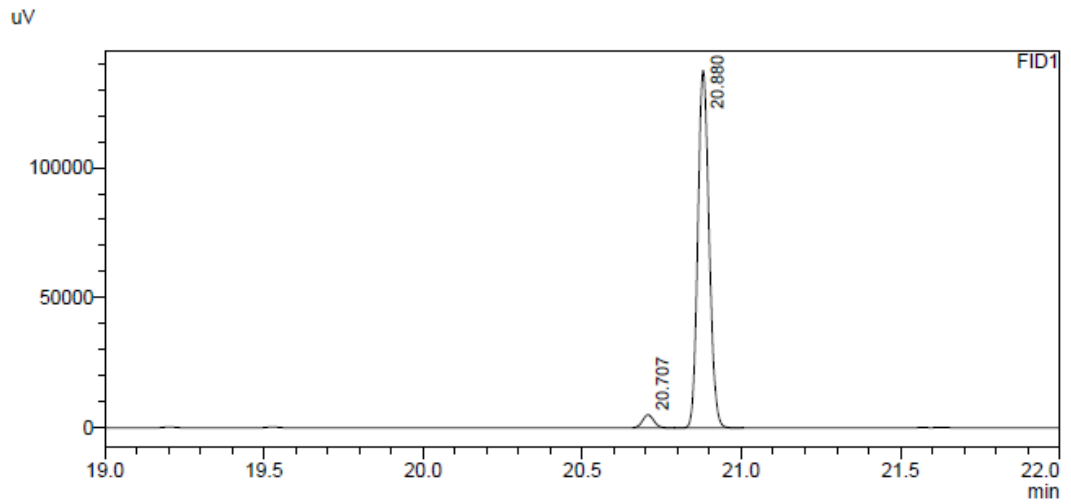

FID1

| Peak# | Ret. Time | Area   | Area%   |
|-------|-----------|--------|---------|
| 1     | 20.707    | 12390  | 3.529   |
| 2     | 20.880    | 338672 | 96.471  |
| Total |           | 351062 | 100.000 |

# I, no *i*PrOH

Sample Name : t=72\_SOD\_780  
Sample ID :  
Data Filename : t=72\_SOD\_780.gcd  
Method Filename : Methode\_Chiral\_MUC\_2.gcm  
Batch Filename : batch\_chiral.gcb  
Vial # : 11  
Injection Volume : 1 uL  
Date Acquired : 23.07.2019 01:26:36  
Date Processed : 29.07.2019 16:01:17

uV

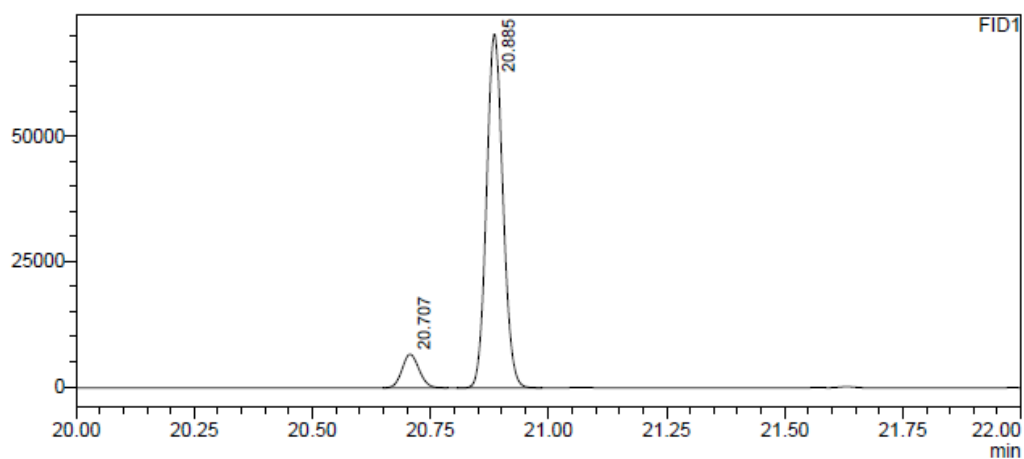

FID1

| Peak# | Ret. Time | Area   | Area%   |
|-------|-----------|--------|---------|
| 1     | 20.707    | 16765  | 8.935   |
| 2     | 20.885    | 170861 | 91.065  |
| Total |           | 187626 | 100.000 |

Sample Name : SOD-782\_72  
Sample ID :  
Data Filename : SOD-782\_72.gcd  
Method Filename : Methode\_Chiral\_MUC\_2.gcm  
Batch Filename : batch\_chiral.gcb  
Vial # : 3  
Injection Volume : 1 uL  
Date Acquired : 07.03.2020 12:51:10  
Date Processed : 07.03.2020 13:34:15

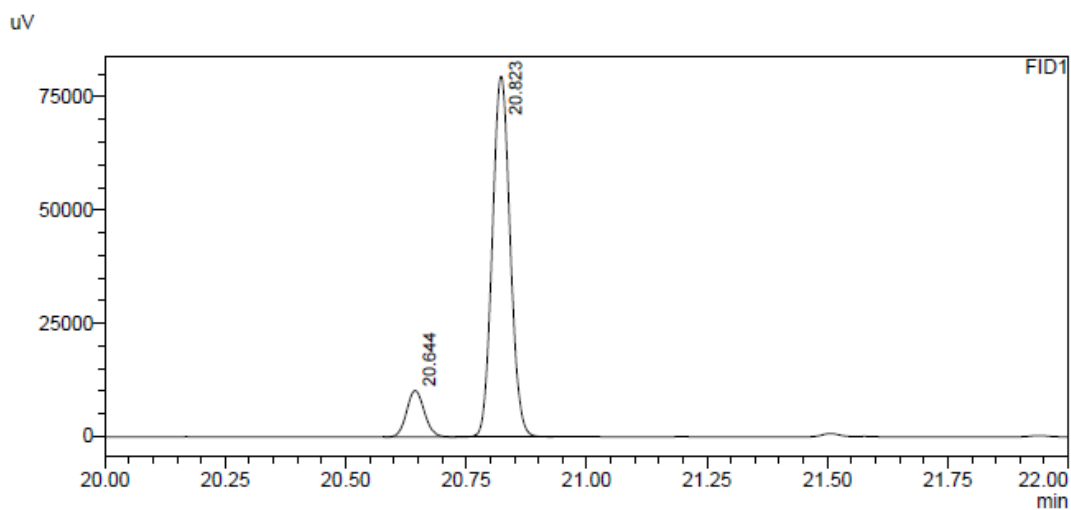

FID1

| Peak# | Ret. Time | Area   | Area%   |
|-------|-----------|--------|---------|
| 1     | 20.644    | 26108  | 11.300  |
| 2     | 20.823    | 204930 | 88.700  |
| Total |           | 231038 | 100.000 |

Sample Name : t=72\_SOD\_784  
Sample ID :  
Data Filename : t=72\_SOD\_784.gcd  
Method Filename : Methode\_Chiral\_MUC\_2.gcm  
Batch Filename : batch\_chiral.gcb  
Vial # : 13  
Injection Volume : 1 uL  
Date Acquired : 23.07.2019 03:02:10  
Date Processed : 29.07.2019 16:03:13

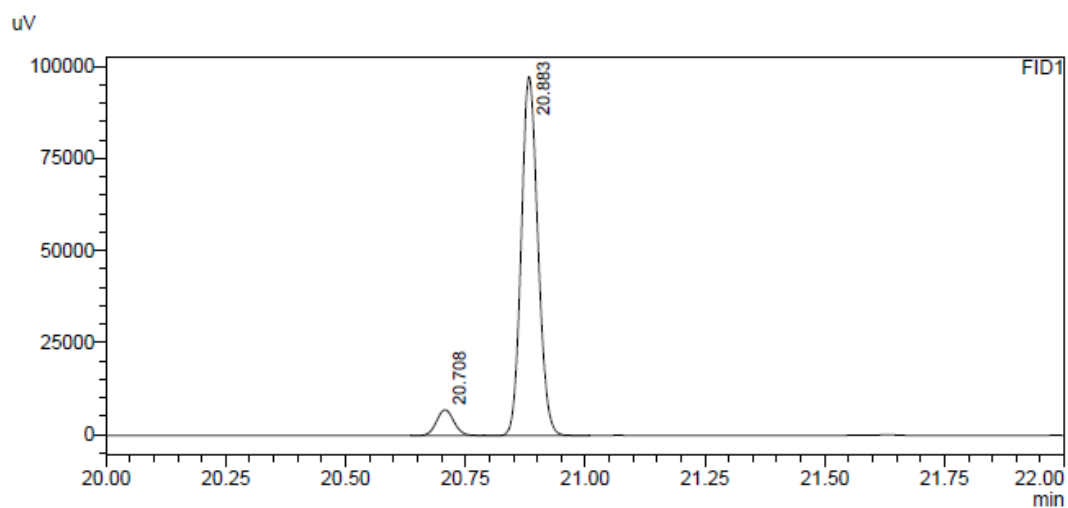

FID1

| Peak# | Ret. Time | Area   | Area%   |
|-------|-----------|--------|---------|
| 1     | 20.708    | 17477  | 6.900   |
| 2     | 20.883    | 235825 | 93.100  |
| Total |           | 253302 | 100.000 |



No 1, *i*PrOH

Sample Name : t=72\_SOD-1027  
Sample ID :  
Data Filename : t=72\_SOD-1027.gcd  
Method Filename : Methode\_Chiral\_MUC\_2.gcm  
Batch Filename : batch\_chiral.gcb  
Vial # : 10  
Injection Volume : 1 uL  
Date Acquired : 26.02.2020 22:17:42  
Date Processed : 26.02.2020 23:00:46

uV

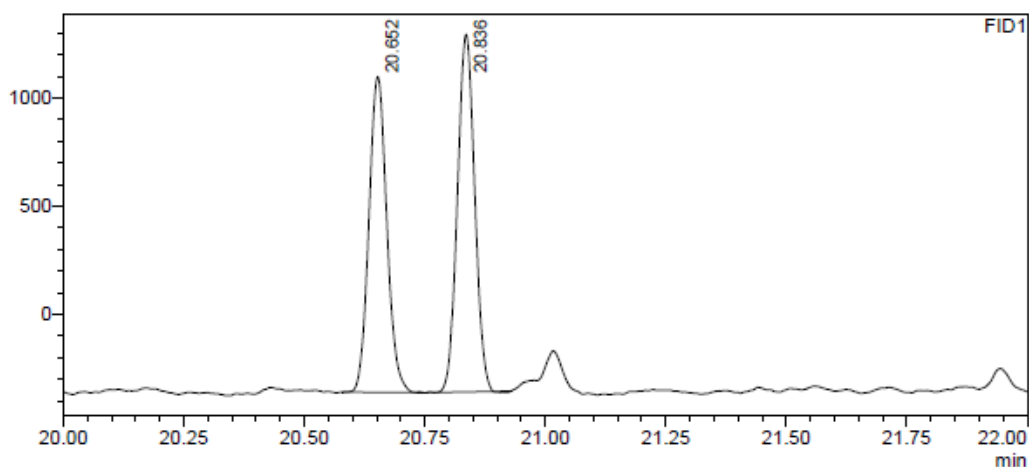

| Peak# | Ret. Time | Area | Area%   |
|-------|-----------|------|---------|
| 1     | 20.652    | 3776 | 47.874  |
| 2     | 20.836    | 4111 | 52.126  |
| Total |           | 7887 | 100.000 |

Sample Name : t=72\_SOD-1028  
Sample ID :  
Data Filename : t=72\_SOD-1028.gcd  
Method Filename : Methode\_Chiral\_MUC\_2.gcm  
Batch Filename : batch\_chiral.gcb  
Vial # : 11  
Injection Volume : 1 uL  
Date Acquired : 26.02.2020 23:05:32  
Date Processed : 26.02.2020 23:48:34

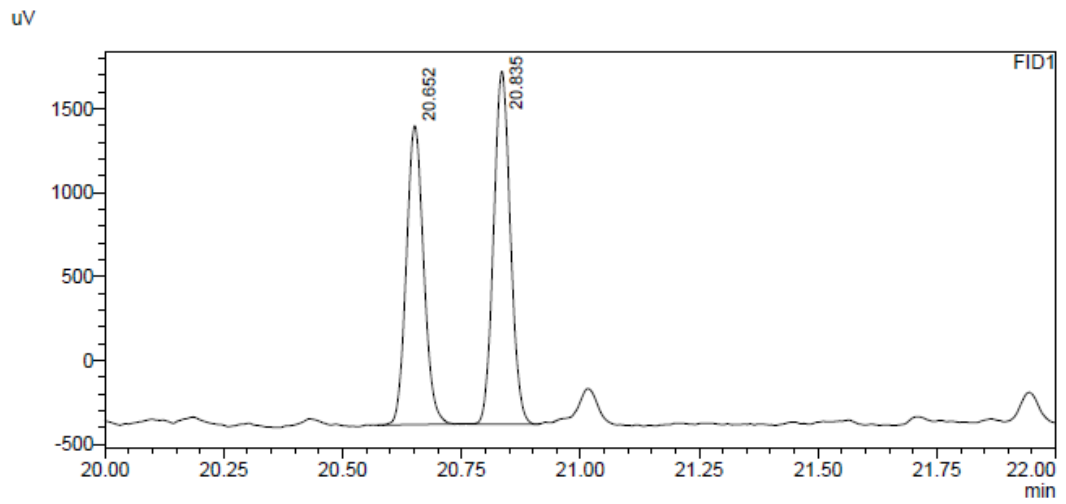

FID1

| Peak# | Ret. Time | Area | Area%   |
|-------|-----------|------|---------|
| 1     | 20.652    | 4533 | 46.714  |
| 2     | 20.835    | 5171 | 53.286  |
| Total |           | 9703 | 100.000 |

Sample Name : t=72\_SOD-1029  
Sample ID :  
Data Filename : t=72\_SOD-1029.gcd  
Method Filename : Methode\_Chiral\_MUC\_2.gcm  
Batch Filename : batch\_chiral.gcb  
Vial # : 12  
Injection Volume : 1 uL  
Date Acquired : 26.02.2020 23:53:18  
Date Processed : 27.02.2020 00:36:20

uV

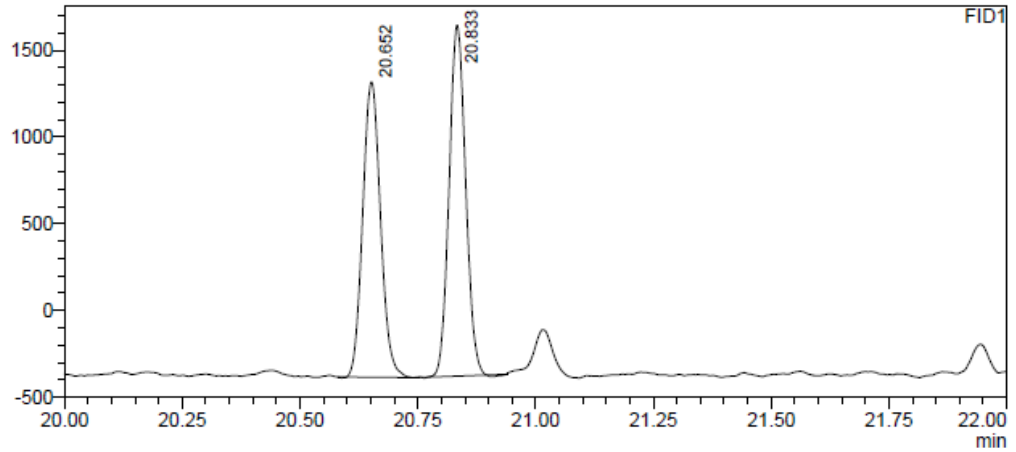

FID1

| Peak# | Ret. Time | Area | Area%   |
|-------|-----------|------|---------|
| 1     | 20.652    | 4471 | 47.566  |
| 2     | 20.833    | 4929 | 52.434  |
| Total |           | 9400 | 100.000 |

No I, no *i*PrOH

Sample Name : t=72\_SOD-1024  
Sample ID :  
Data Filename : t=72\_SOD-1024.gcd  
Method Filename : Methode\_Chiral\_MUC\_2.gcm  
Batch Filename : batch\_chiral.gcb  
Vial # : 7  
Injection Volume : 1 uL  
Date Acquired : 26.02.2020 19:54:26  
Date Processed : 26.02.2020 20:37:28

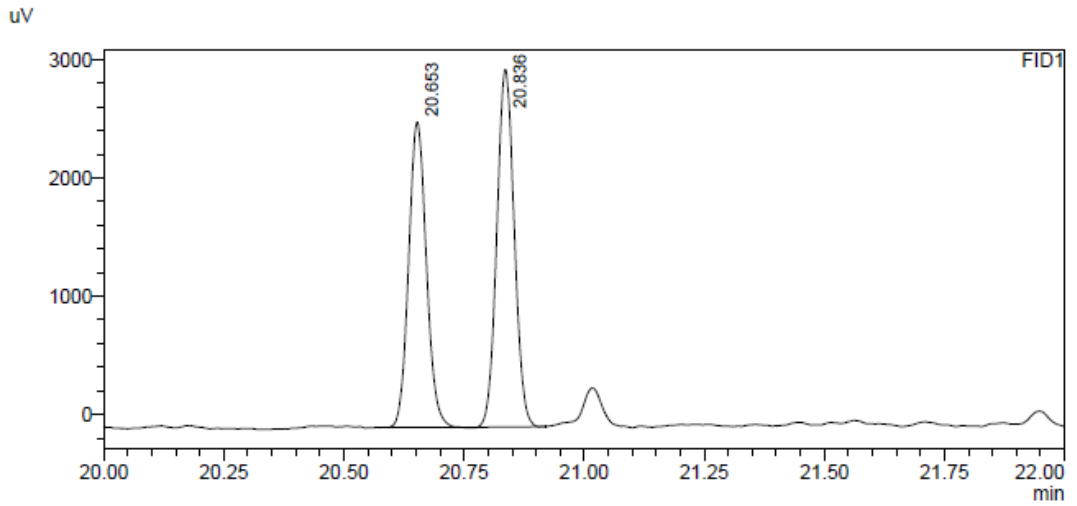

FID1

| Peak# | Ret. Time | Area  | Area%   |
|-------|-----------|-------|---------|
| 1     | 20.653    | 6647  | 46.563  |
| 2     | 20.836    | 7628  | 53.437  |
| Total |           | 14275 | 100.000 |

Sample Name : t=72\_SOD-1025  
Sample ID :  
Data Filename : t=72\_SOD-1025.gcd  
Method Filename : Methode\_Chiral\_MUC\_2.gcm  
Batch Filename : batch\_chiral.gcb  
Vial # : 8  
Injection Volume : 1 uL  
Date Acquired : 26.02.2020 20:42:13  
Date Processed : 26.02.2020 21:25:14

uV

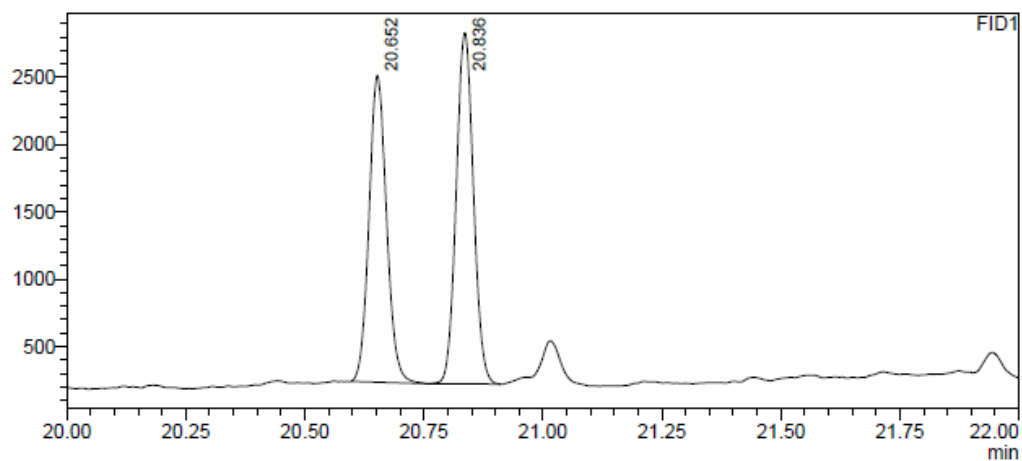

FID1

| Peak# | Ret. Time | Area  | Area%   |
|-------|-----------|-------|---------|
| 1     | 20.652    | 5848  | 47.055  |
| 2     | 20.836    | 6580  | 52.945  |
| Total |           | 12428 | 100.000 |

Sample Name : t=72\_SOD-1026  
Sample ID :  
Data Filename : t=72\_SOD-1026.gcd  
Method Filename : Methode\_Chiral\_MUC\_2.gcm  
Batch Filename : batch\_chiral.gcb  
Vial # : 9  
Injection Volume : 1 uL  
Date Acquired : 26.02.2020 21:29:57  
Date Processed : 26.02.2020 22:13:01

uV

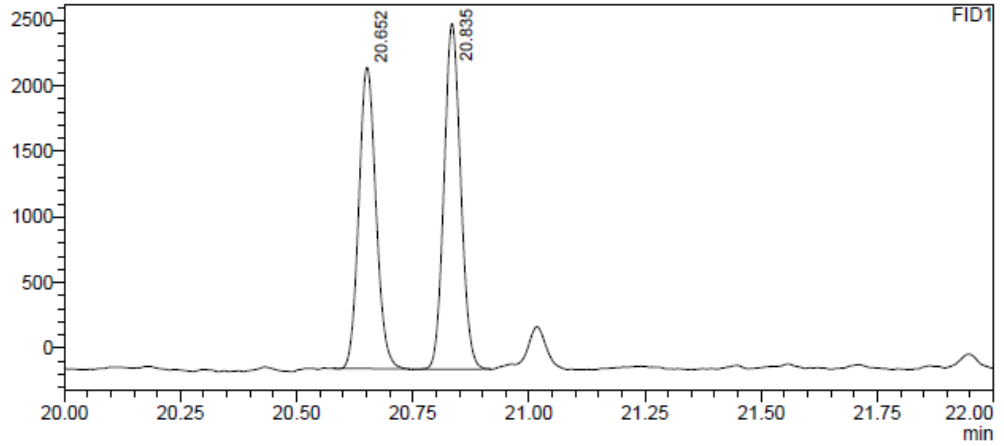

| Peak# | Ret. Time | Area  | Area%   |
|-------|-----------|-------|---------|
| 1     | 20.652    | 5915  | 47.328  |
| 2     | 20.835    | 6582  | 52.672  |
| Total |           | 12497 | 100.000 |

### Entry 3

#### I, *i*PrOH

Sample Name : t=72\_SOD\_824  
Sample ID :  
Data Filename : t=72\_SOD\_824.gcd  
Method Filename : Methode\_Chiral\_MUC\_2.gcm  
Batch Filename : batch\_chiral.gcb  
Vial # : 34  
Injection Volume : 1 uL  
Date Acquired : 18.08.2019 13:19:33  
Date Processed : 19.08.2019 13:41:56

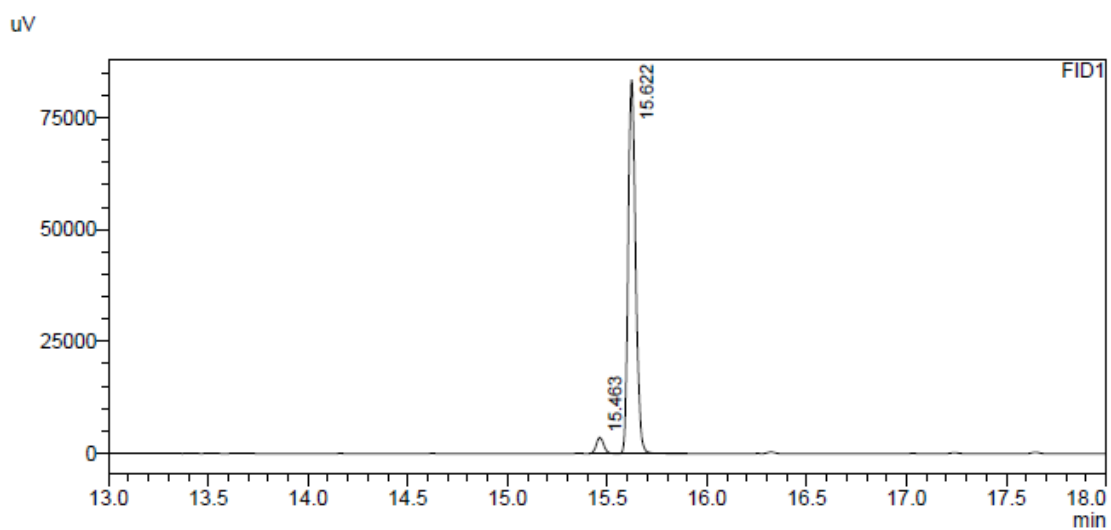

| Peak# | Ret. Time | Area   | Area%   |
|-------|-----------|--------|---------|
| 1     | 15.463    | 9240   | 4.079   |
| 2     | 15.622    | 217287 | 95.921  |
| Total |           | 226527 | 100.000 |

Sample Name : t=72\_SOD\_825  
Sample ID :  
Data Filename : t=72\_SOD\_825.gcd  
Method Filename : Methode\_Chiral\_MUC\_2.gcm  
Batch Filename : batch\_chiral.gcb  
Vial # : 35  
Injection Volume : 1 uL  
Date Acquired : 18.08.2019 14:07:22  
Date Processed : 19.08.2019 13:42:16

uV

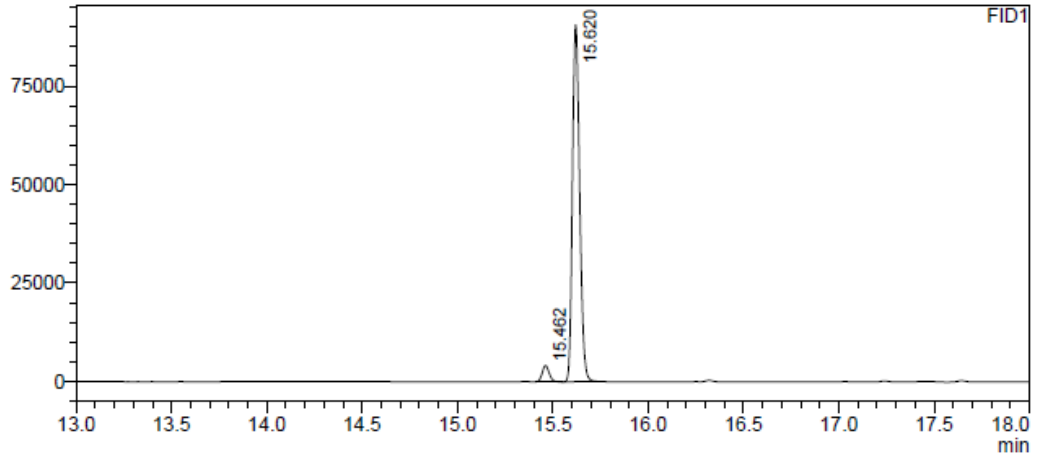

FID1

| Peak# | Ret. Time | Area   | Area%   |
|-------|-----------|--------|---------|
| 1     | 15.462    | 10320  | 4.145   |
| 2     | 15.620    | 238628 | 95.855  |
| Total |           | 248948 | 100.000 |



Sample Name : t=72\_SOD\_826  
Sample ID :  
Data Filename : t=72\_SOD\_826.gcd  
Method Filename : Methode\_Chiral\_MUC\_2.gcm  
Batch Filename : batch\_chiral.gcb  
Vial # : 36  
Injection Volume : 1 uL  
Date Acquired : 18.08.2019 14:55:10  
Date Processed : 20.08.2019 16:41:06

uV

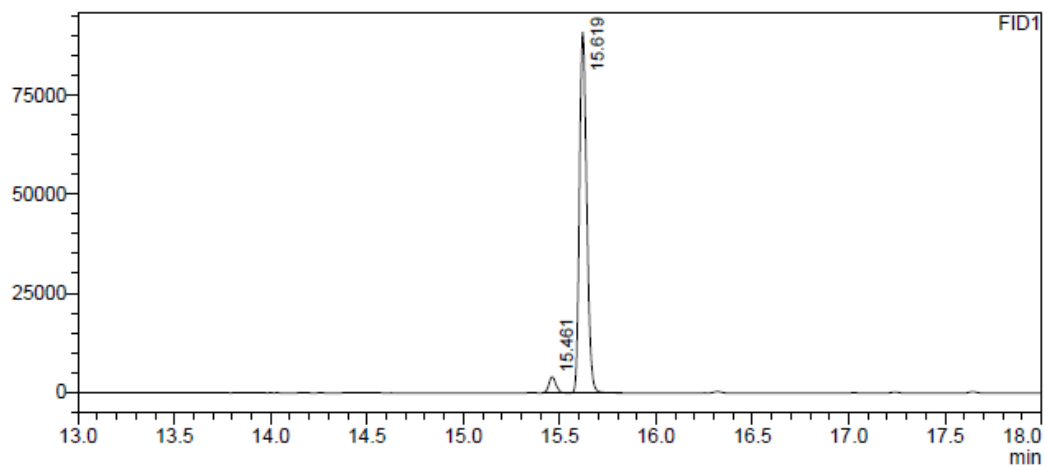

FID1

| Peak# | Ret. Time | Area   | Area%   |
|-------|-----------|--------|---------|
| 1     | 15.461    | 10133  | 4.053   |
| 2     | 15.619    | 239889 | 95.947  |
| Total |           | 250022 | 100.000 |

# I, no *i*PrOH

Sample Name : t=72\_SOD\_821  
Sample ID :  
Data Filename : t=72\_SOD\_821.gcd  
Method Filename : Methode\_Chiral\_MUC\_2.gcm  
Batch Filename : batch\_chiral.gcb  
Vial # : 31  
Injection Volume : 1 uL  
Date Acquired : 18.08.2019 10:56:02  
Date Processed : 19.08.2019 13:40:05

uV

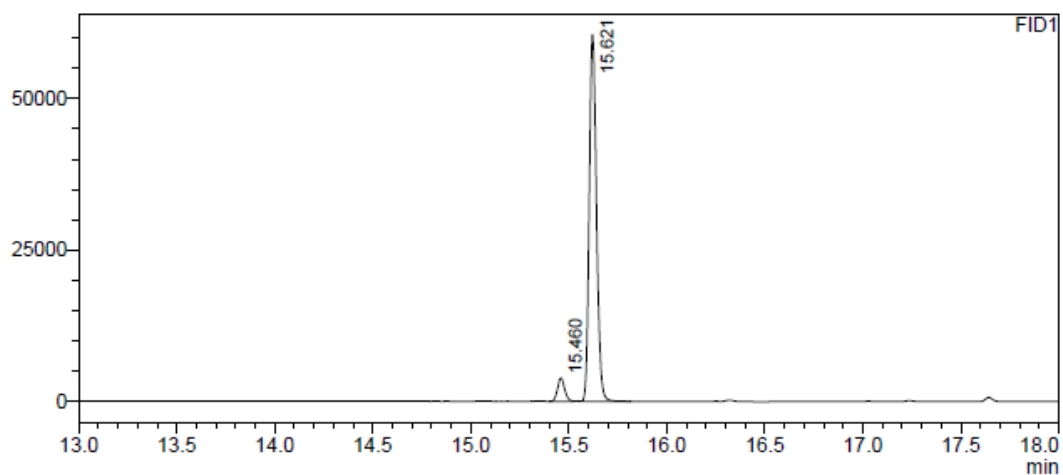

FID1

| Peak# | Ret. Time | Area   | Area%   |
|-------|-----------|--------|---------|
| 1     | 15.460    | 9647   | 5.861   |
| 2     | 15.621    | 154961 | 94.139  |
| Total |           | 164608 | 100.000 |

Sample Name : t=72\_SOD\_822  
Sample ID :  
Data Filename : t=72\_SOD\_822.gcd  
Method Filename : Methode\_Chiral\_MUC\_2.gcm  
Batch Filename : batch\_chiral.gcb  
Vial # : 32  
Injection Volume : 1 uL  
Date Acquired : 18.08.2019 11:43:52  
Date Processed : 19.08.2019 13:40:58

uV

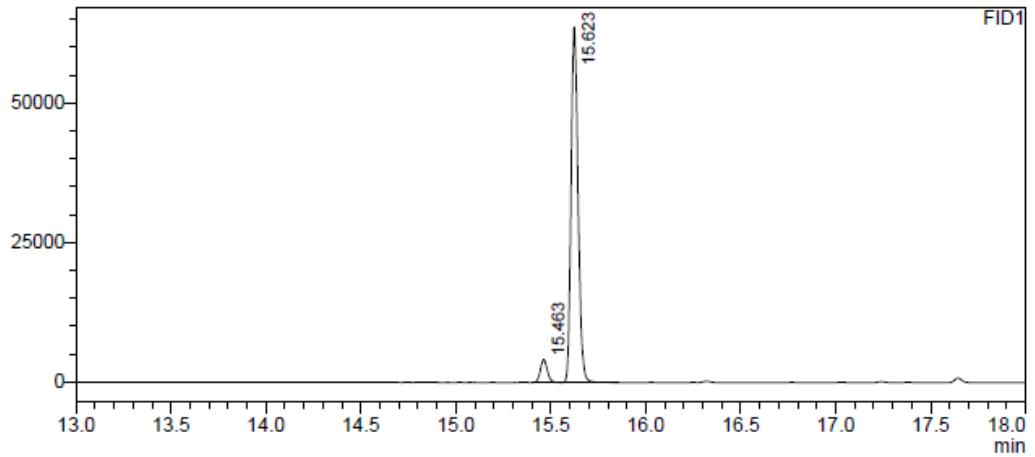

FID1

| Peak# | Ret. Time | Area   | Area%   |
|-------|-----------|--------|---------|
| 1     | 15.463    | 10384  | 5.980   |
| 2     | 15.623    | 163277 | 94.020  |
| Total |           | 173661 | 100.000 |

Sample Name : t=72\_SOD\_823  
Sample ID :  
Data Filename : t=72\_SOD\_823.gcd  
Method Filename : Methode\_Chiral\_MUC\_2.gcm  
Batch Filename : batch\_chiral.gcb  
Vial # : 33  
Injection Volume : 1 uL  
Date Acquired : 18.08.2019 12:31:42  
Date Processed : 19.08.2019 13:41:19

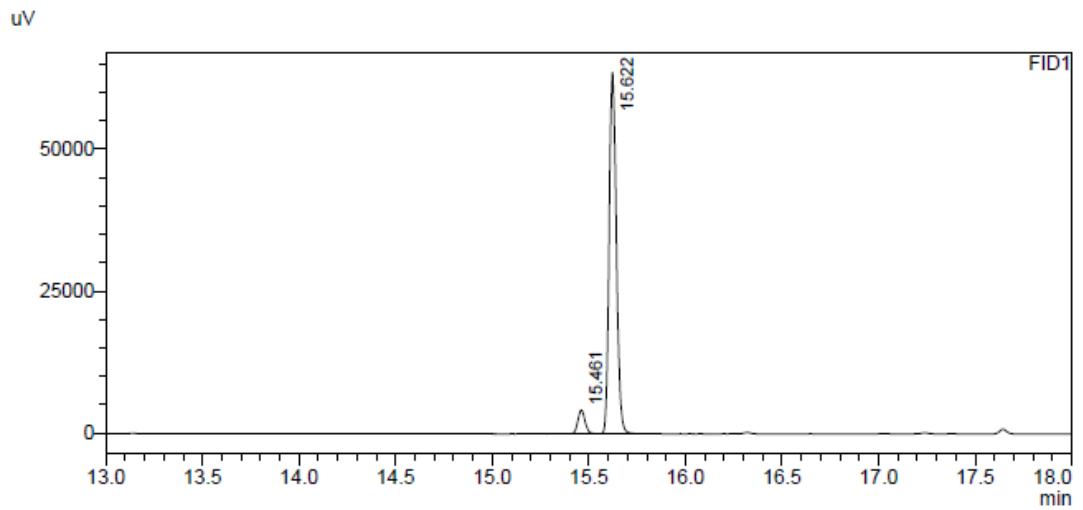

FID1

| Peak# | Ret. Time | Area   | Area%   |
|-------|-----------|--------|---------|
| 1     | 15.461    | 10691  | 6.084   |
| 2     | 15.622    | 165013 | 93.916  |
| Total |           | 175704 | 100.000 |

No 1, *i*PrOH

Sample Name : t=72\_SOD-1033  
Sample ID :  
Data Filename : t=72\_SOD-1033.gcd  
Method Filename : Methode\_Chiral\_MUC\_2.gcm  
Batch Filename : batch\_chiral.gcb  
Vial # : 16  
Injection Volume : 1 uL  
Date Acquired : 27.02.2020 03:04:16  
Date Processed : 27.02.2020 03:47:20

uV

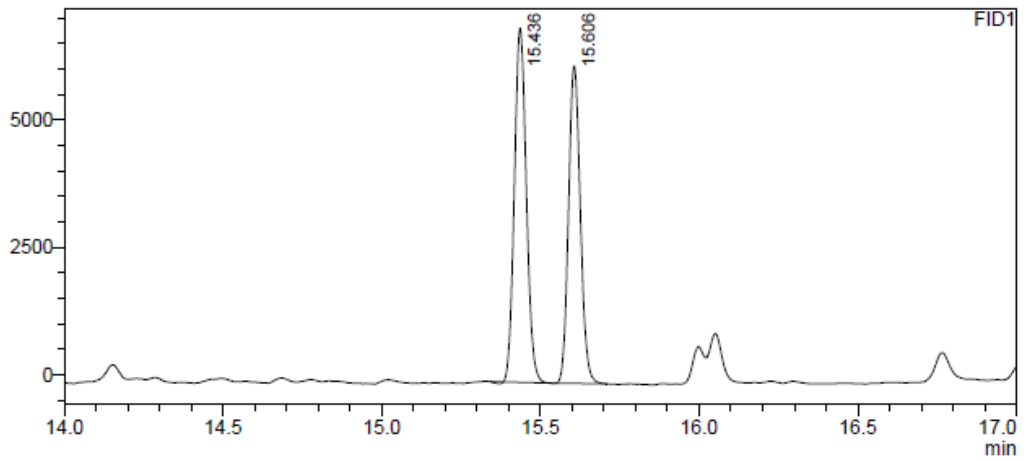

| Peak# | Ret. Time | Area  | Area%   |
|-------|-----------|-------|---------|
| 1     | 15.436    | 18204 | 53.092  |
| 2     | 15.606    | 16084 | 46.908  |
| Total |           | 34288 | 100.000 |

Sample Name : t=72\_SOD-1034  
Sample ID :  
Data Filename : t=72\_SOD-1034.gcd  
Method Filename : Methode\_Chiral\_MUC\_2.gcm  
Batch Filename : batch\_chiral.gcb  
Vial # : 17  
Injection Volume : 1 uL  
Date Acquired : 27.02.2020 03:52:01  
Date Processed : 27.02.2020 04:35:05

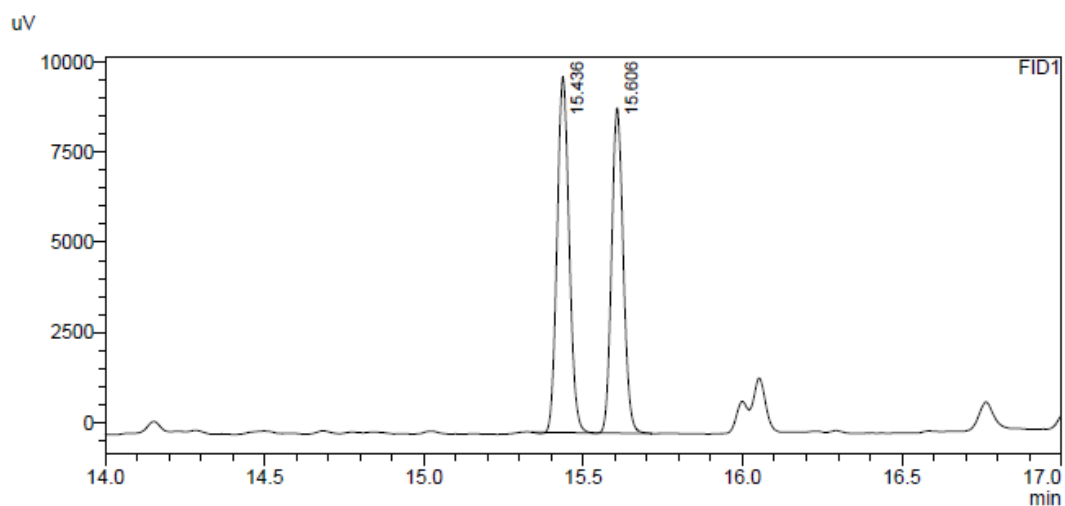

FID1

| Peak# | Ret. Time | Area  | Area%   |
|-------|-----------|-------|---------|
| 1     | 15.436    | 26009 | 53.057  |
| 2     | 15.606    | 23012 | 46.943  |
| Total |           | 49021 | 100.000 |

Sample Name : t=72\_SOD-1035  
Sample ID :  
Data Filename : t=72\_SOD-1035.gcd  
Method Filename : Methode\_Chiral\_MUC\_2.gcm  
Batch Filename : batch\_chiral.gcb  
Vial # : 18  
Injection Volume : 1 uL  
Date Acquired : 27.02.2020 04:39:43  
Date Processed : 28.02.2020 15:02:36

uV

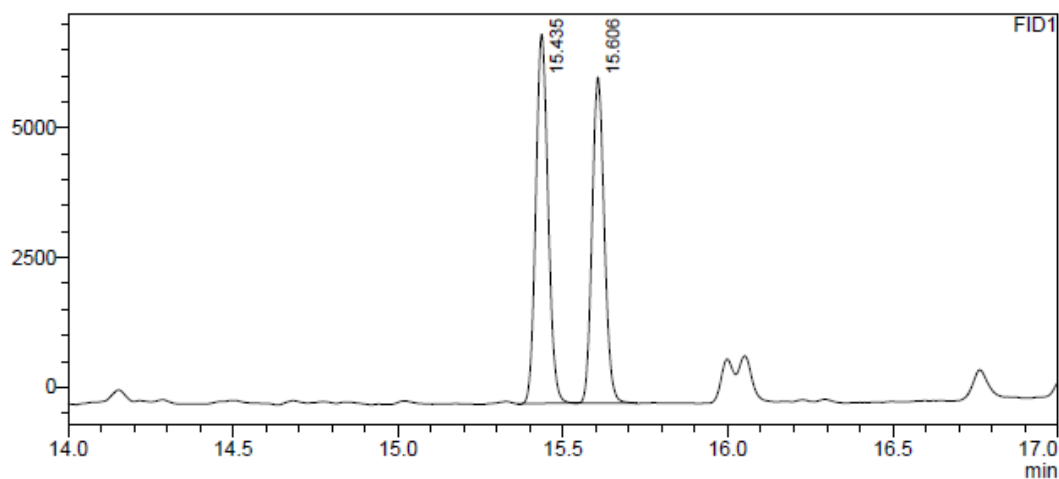

FID1

| Peak# | Ret. Time | Area  | Area%   |
|-------|-----------|-------|---------|
| 1     | 15.435    | 18409 | 53.211  |
| 2     | 15.606    | 16187 | 46.789  |
| Total |           | 34597 | 100.000 |

No I, no *i*PrOH

Sample Name : t=72\_SOD-1030  
Sample ID :  
Data Filename : t=72\_SOD-1030.gcd  
Method Filename : Methode\_Chiral\_MUC\_2.gcm  
Batch Filename : batch\_chiral.gcb  
Vial # : 13  
Injection Volume : 1 uL  
Date Acquired : 27.02.2020 00:41:04  
Date Processed : 27.02.2020 01:24:09

uV

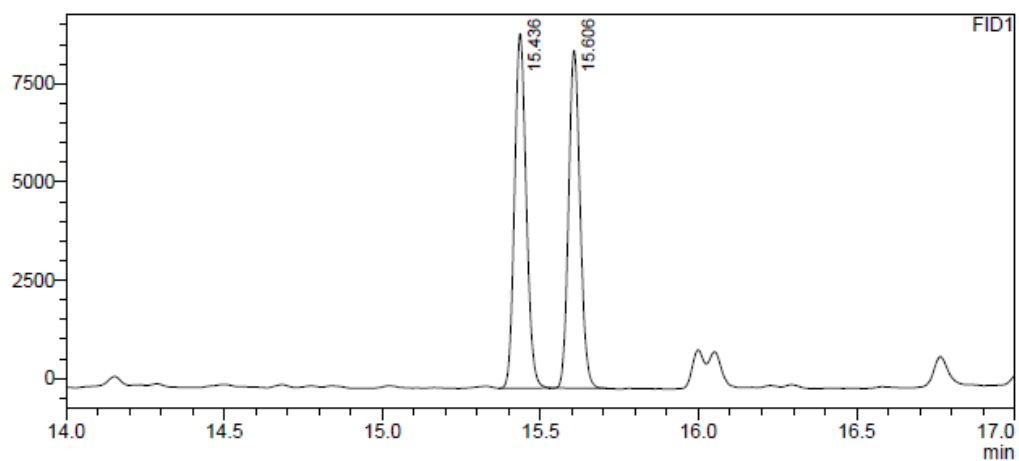

FID1

| Peak# | Ret. Time | Area  | Area%   |
|-------|-----------|-------|---------|
| 1     | 15.436    | 23266 | 51.611  |
| 2     | 15.606    | 21813 | 48.389  |
| Total |           | 45079 | 100.000 |



Sample Name : t=72\_SOD-1031  
Sample ID :  
Data Filename : t=72\_SOD-1031.gcd  
Method Filename : Methode\_Chiral\_MUC\_2.gcm  
Batch Filename : batch\_chiral.gcb  
Vial # : 14  
Injection Volume : 1 uL  
Date Acquired : 27.02.2020 01:28:50  
Date Processed : 27.02.2020 02:11:53

uV

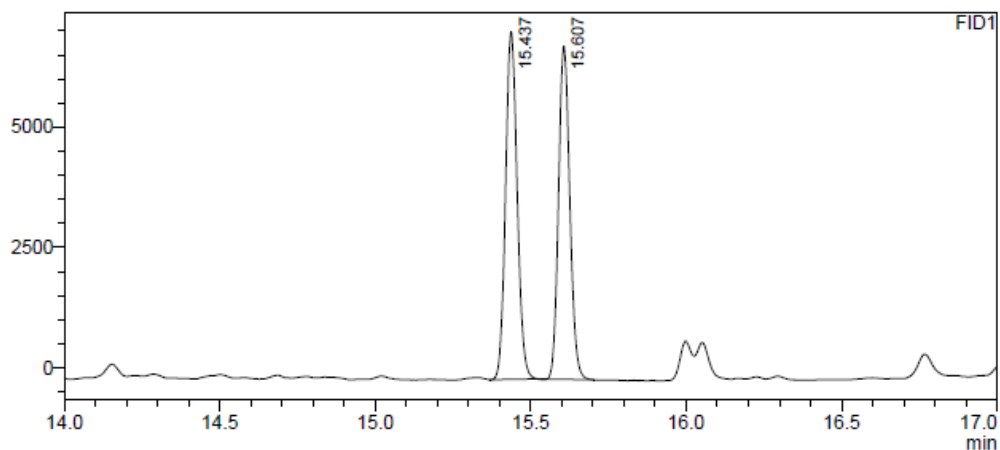

FID1

| Peak# | Ret. Time | Area  | Area%   |
|-------|-----------|-------|---------|
| 1     | 15.437    | 18776 | 51.765  |
| 2     | 15.607    | 17496 | 48.235  |
| Total |           | 36272 | 100.000 |

Sample Name : t=72\_SOD-1032  
Sample ID :  
Data Filename : t=72\_SOD-1032.gcd  
Method Filename : Methode\_Chiral\_MUC\_2.gcm  
Batch Filename : batch\_chiral.gcb  
Vial # : 15  
Injection Volume : 1 uL  
Date Acquired : 27.02.2020 02:16:33  
Date Processed : 27.02.2020 02:59:39

uV

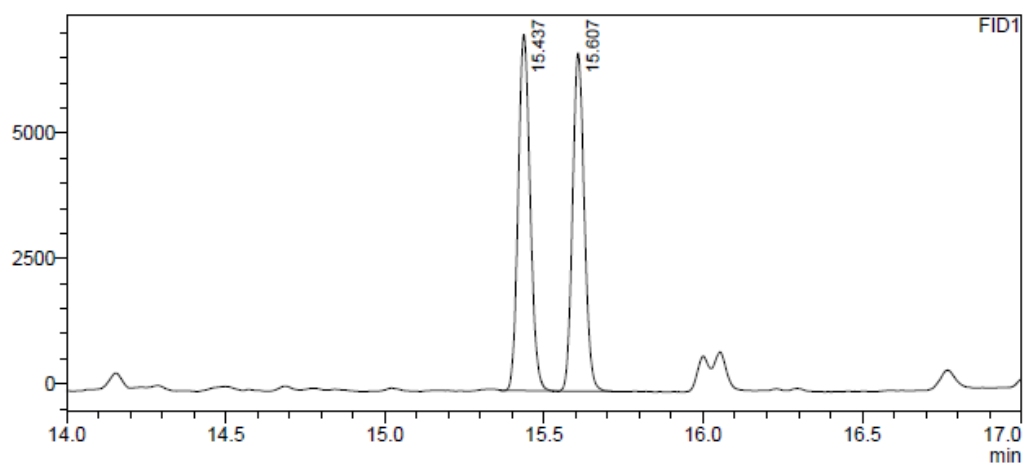

FID1

| Peak# | Ret. Time | Area  | Area%   |
|-------|-----------|-------|---------|
| 1     | 15.437    | 18576 | 51.723  |
| 2     | 15.607    | 17338 | 48.277  |
| Total |           | 35913 | 100.000 |

## Entry 4

I, *i*PrOH

Sample Name : t=72\_SOD\_818  
Sample ID :  
Data Filename : t=72\_SOD\_818.gcd  
Method Filename : Methode\_Chiral\_m-Me\_aldehyde.gcm  
Batch Filename : batch\_chiral.gcb  
Vial # : 34  
Injection Volume : 1 uL  
Date Acquired : 25.08.2019 09:09:21  
Date Processed : 25.08.2019 13:20:24

uV

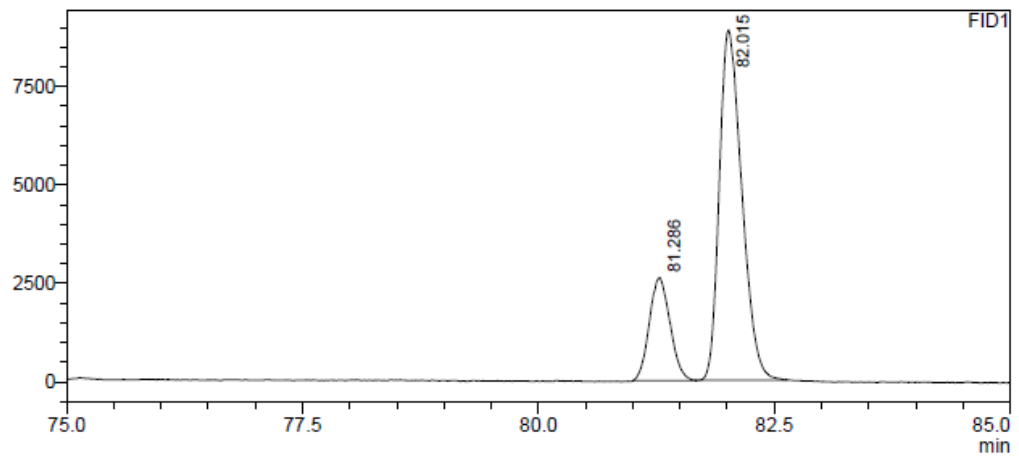

FID1

| Peak# | Ret. Time | Area   | Area%   |
|-------|-----------|--------|---------|
| 1     | 81.286    | 39958  | 21.313  |
| 2     | 82.015    | 147526 | 78.687  |
| Total |           | 187484 | 100.000 |

Sample Name : t=72\_SOD\_819  
Sample ID :  
Data Filename : t=72\_SOD\_819.gcd  
Method Filename : Methode\_Chiral\_m-Me\_aldehyde.gcm  
Batch Filename : batch\_chiral.gcb  
Vial # : 35  
Injection Volume : 1 uL  
Date Acquired : 25.08.2019 13:24:37  
Date Processed : 25.08.2019 17:35:41

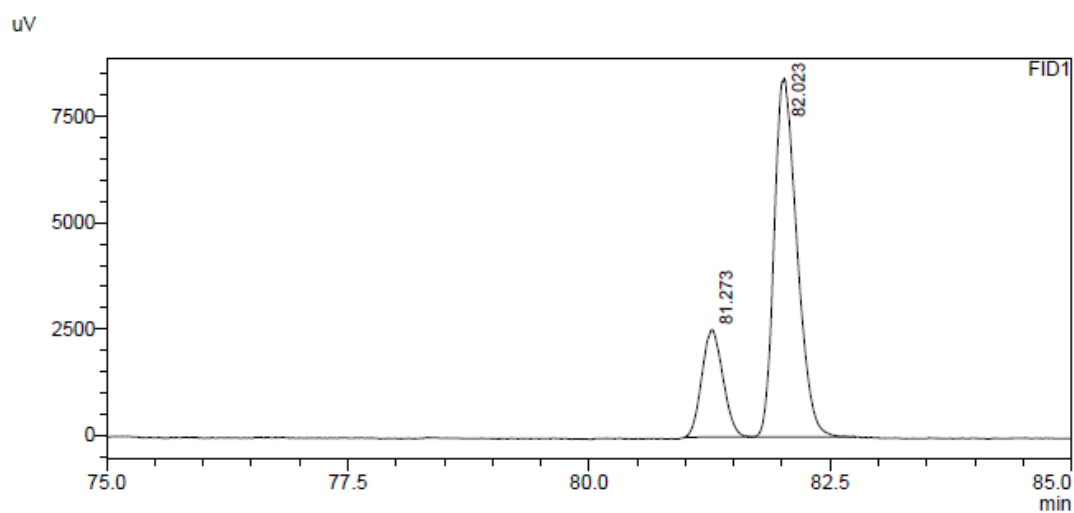

FID1

| Peak# | Ret. Time | Area   | Area%   |
|-------|-----------|--------|---------|
| 1     | 81.273    | 38336  | 21.676  |
| 2     | 82.023    | 138526 | 78.324  |
| Total |           | 176862 | 100.000 |

Sample Name : t=72\_SOD\_820  
Sample ID :  
Data Filename : t=72\_SOD\_820.gcd  
Method Filename : Methode\_Chiral\_m-Me\_aldehyde.gcm  
Batch Filename : batch\_chiral.gcb  
Vial # : 36  
Injection Volume : 1 uL  
Date Acquired : 25.08.2019 17:39:55  
Date Processed : 25.08.2019 21:50:58

uV

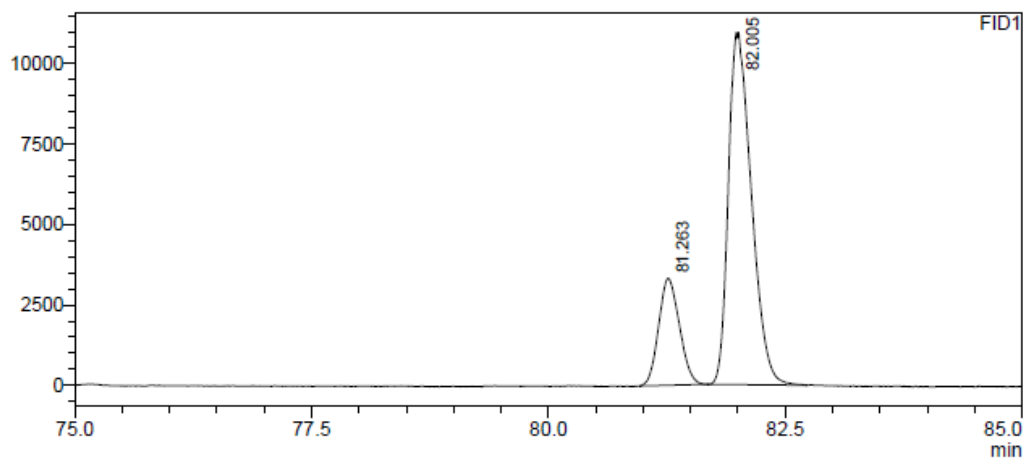

FID1

| Peak# | Ret. Time | Area   | Area%   |
|-------|-----------|--------|---------|
| 1     | 81.263    | 50759  | 21.520  |
| 2     | 82.005    | 185111 | 78.480  |
| Total |           | 235870 | 100.000 |

# I, no *i*PrOH

Sample Name : t=72\_SOD\_815  
Sample ID :  
Data Filename : t=72\_SOD\_815.gcd  
Method Filename : Methode\_Chiral\_m-Me\_aldehyde.gcm  
Batch Filename : batch\_chiral.gcb  
Vial # : 31  
Injection Volume : 1 uL  
Date Acquired : 24.08.2019 20:23:31  
Date Processed : 25.08.2019 00:34:34

uV

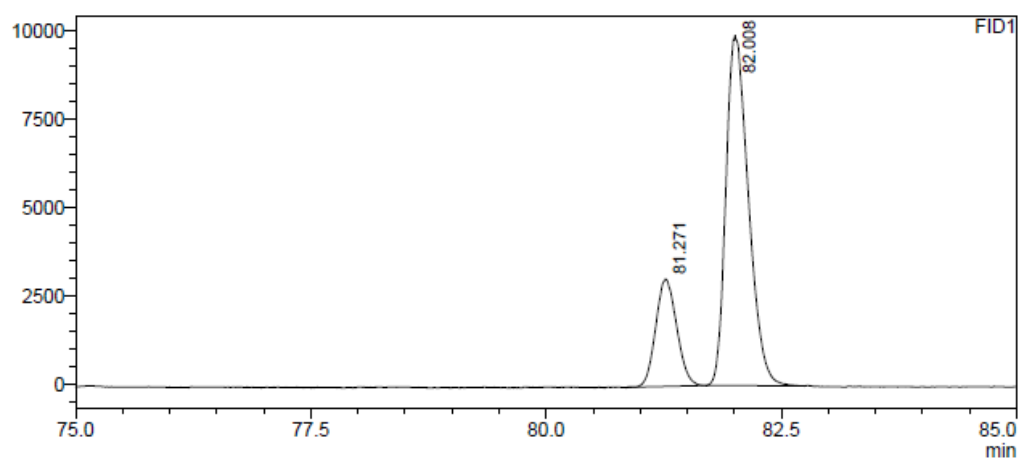

| Peak# | Ret. Time | Area   | Area%   |
|-------|-----------|--------|---------|
| 1     | 81.271    | 47054  | 22.228  |
| 2     | 82.008    | 164632 | 77.772  |
| Total |           | 211686 | 100.000 |

Sample Name : t=72\_SOD\_816  
Sample ID :  
Data Filename : t=72\_SOD\_816.gcd  
Method Filename : Methode\_Chiral\_m-Me\_aldehyde.gcm  
Batch Filename : batch\_chiral.gcb  
Vial # : 32  
Injection Volume : 1 uL  
Date Acquired : 25.08.2019 00:38:44  
Date Processed : 25.08.2019 04:49:49

uV

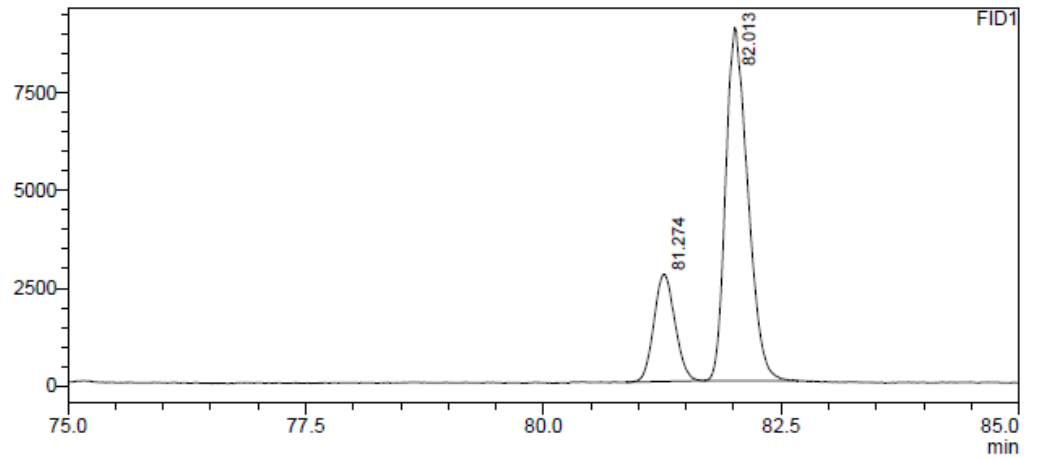

| Peak# | Ret. Time | Area   | Area%   |
|-------|-----------|--------|---------|
| 1     | 81.274    | 42292  | 22.420  |
| 2     | 82.013    | 146342 | 77.580  |
| Total |           | 188634 | 100.000 |

Sample Name : t=72\_SOD\_817  
Sample ID :  
Data Filename : t=72\_SOD\_817.gcd  
Method Filename : Methode\_Chiral\_m-Me\_aldehyde.gcm  
Batch Filename : batch\_chiral.gcb  
Vial # : 33  
Injection Volume : 1 uL  
Date Acquired : 25.08.2019 04:54:01  
Date Processed : 25.08.2019 09:05:04

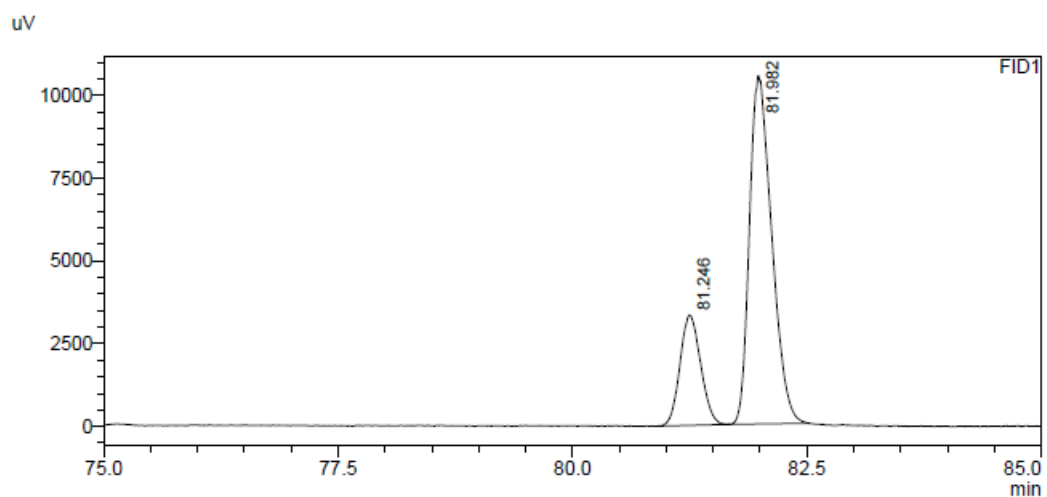

FID1

| Peak# | Ret. Time | Area   | Area%   |
|-------|-----------|--------|---------|
| 1     | 81.246    | 51244  | 22.793  |
| 2     | 81.982    | 173575 | 77.207  |
| Total |           | 224818 | 100.000 |



No 1, *i*PrOH

Sample Name : t=72\_SOD-1039  
Sample ID :  
Data Filename : t=72\_SOD-1039.gcd  
Method Filename : Methode\_Chiral\_m-Me\_aldehyde.gcm  
Batch Filename : batch\_chiral.gcb  
Vial # : 22  
Injection Volume : 1 uL  
Date Acquired : 27.02.2020 18:13:25  
Date Processed : 27.02.2020 22:24:31

uV

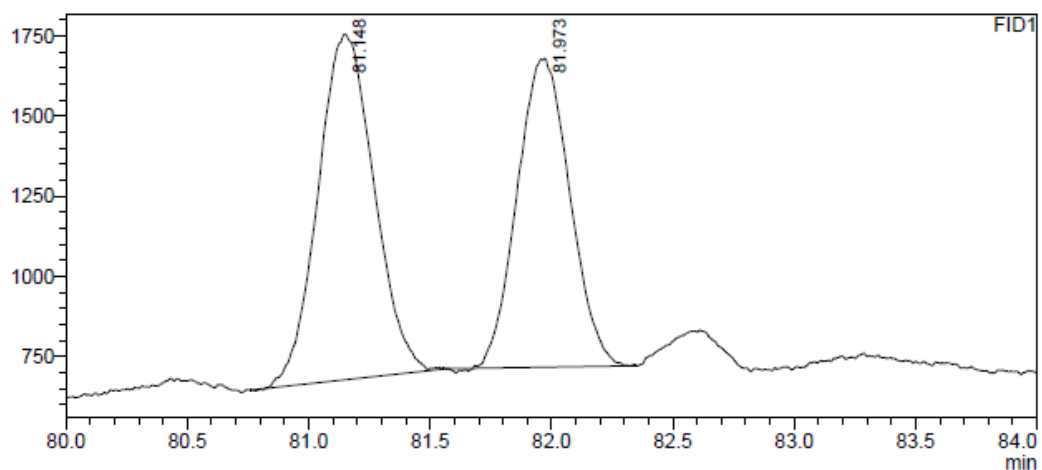

FID1

| Peak# | Ret. Time | Area  | Area%   |
|-------|-----------|-------|---------|
| 1     | 81.148    | 17341 | 54.315  |
| 2     | 81.973    | 14585 | 45.685  |
| Total |           | 31926 | 100.000 |

Sample Name : t=72\_SOD-1040  
Sample ID :  
Data Filename : t=72\_SOD-1040.gcd  
Method Filename : Methode\_Chiral\_m-Me\_aldehyde.gcm  
Batch Filename : batch\_chiral.gcb  
Vial # : 23  
Injection Volume : 1 uL  
Date Acquired : 27.02.2020 22:28:45  
Date Processed : 28.02.2020 02:39:48

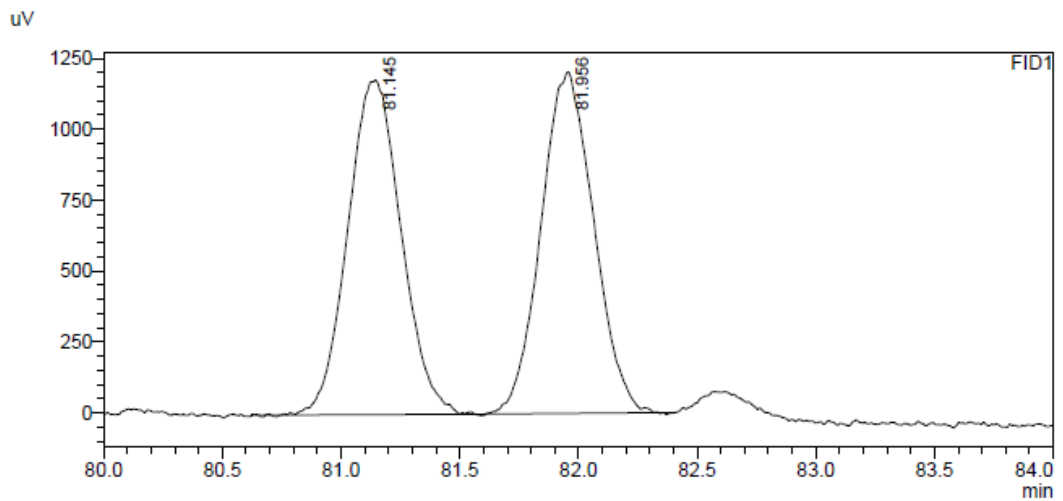

FID1

| Peak# | Ret. Time | Area  | Area%   |
|-------|-----------|-------|---------|
| 1     | 81.145    | 18514 | 49.889  |
| 2     | 81.956    | 18596 | 50.111  |
| Total |           | 37111 | 100.000 |

Sample Name : t=72\_SOD-1041  
Sample ID :  
Data Filename : t=72\_SOD-1041.gcd  
Method Filename : Methode\_Chiral\_m-Me\_aldehyde.gcm  
Batch Filename : batch\_chiral.gcb  
Vial # : 24  
Injection Volume : 1 uL  
Date Acquired : 28.02.2020 02:44:02  
Date Processed : 28.02.2020 06:55:08

uv

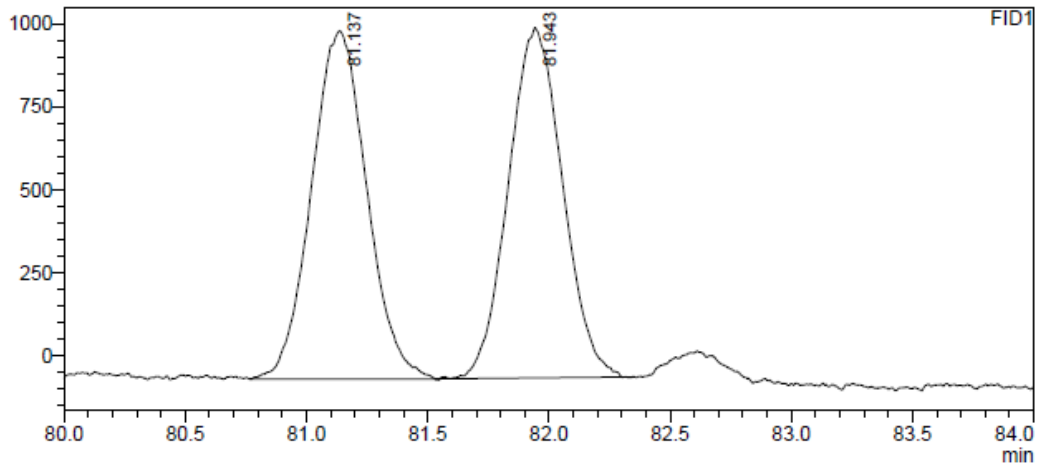

FID1

| Peak# | Ret. Time | Area  | Area%   |
|-------|-----------|-------|---------|
| 1     | 81.137    | 16652 | 50.374  |
| 2     | 81.943    | 16405 | 49.626  |
| Total |           | 33057 | 100.000 |

No I, no *i*PrOH

Sample Name : t=72\_SOD-1036  
Sample ID :  
Data Filename : t=72\_SOD-1036.gcd  
Method Filename : Methode\_Chiral\_m-Me\_aldehyde.gcm  
Batch Filename : batch\_chiral.gcb  
Vial # : 19  
Injection Volume : 1 uL  
Date Acquired : 27.02.2020 05:27:29  
Date Processed : 27.02.2020 09:38:34

uV

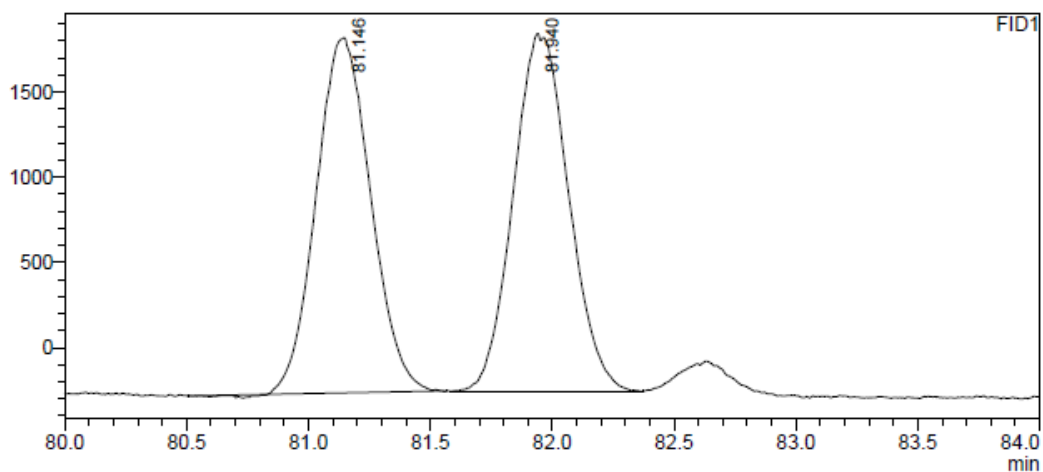

FID1

| Peak# | Ret. Time | Area  | Area%   |
|-------|-----------|-------|---------|
| 1     | 81.146    | 32403 | 49.430  |
| 2     | 81.940    | 33150 | 50.570  |
| Total |           | 65553 | 100.000 |

Sample Name : t=72\_SOD-1037  
Sample ID :  
Data Filename : t=72\_SOD-1037.gcd  
Method Filename : Methode\_Chiral\_m-Me\_aldehyde.gcm  
Batch Filename : batch\_chiral.gcb  
Vial # : 20  
Injection Volume : 1 uL  
Date Acquired : 27.02.2020 09:42:46  
Date Processed : 27.02.2020 13:53:51

uV

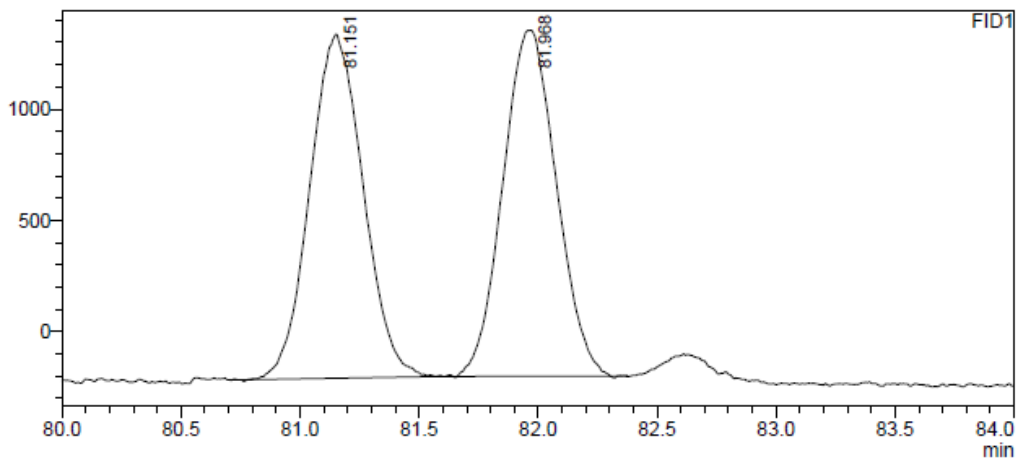

FID1

| Peak# | Ret. Time | Area  | Area%   |
|-------|-----------|-------|---------|
| 1     | 81.151    | 24141 | 49.770  |
| 2     | 81.968    | 24364 | 50.230  |
| Total |           | 48505 | 100.000 |

Sample Name : t=72\_SOD-1038  
Sample ID :  
Data Filename : t=72\_SOD-1038.gcd  
Method Filename : Methode\_Chiral\_m-Me\_aldehyde.gcm  
Batch Filename : batch\_chiral.gcb  
Vial # : 21  
Injection Volume : 1 uL  
Date Acquired : 27.02.2020 13:58:03  
Date Processed : 27.02.2020 18:09:07

uV

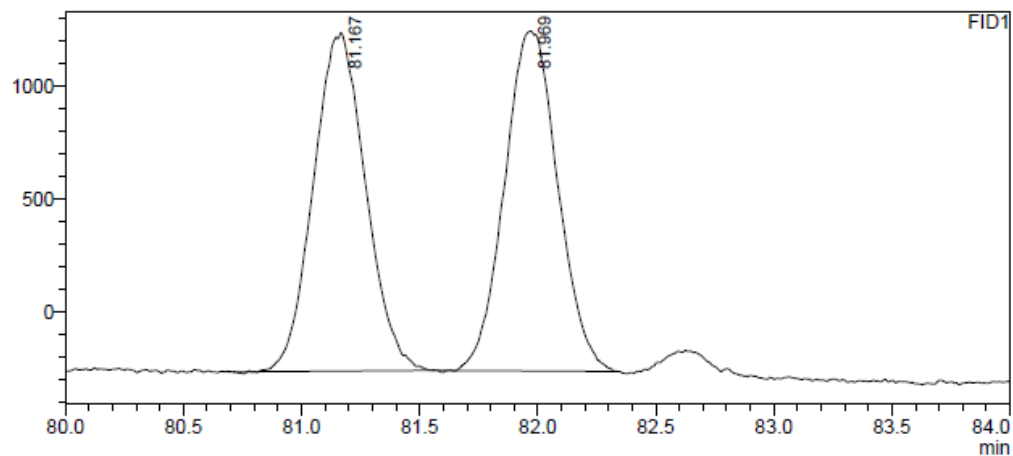

FID1

| Peak# | Ret. Time | Area  | Area%   |
|-------|-----------|-------|---------|
| 1     | 81.167    | 23101 | 49.342  |
| 2     | 81.969    | 23718 | 50.658  |
| Total |           | 46819 | 100.000 |

# Entry 5

I, *i*PrOH

Sample Name : t=72\_SOD\_830  
Sample ID :  
Data Filename : t=72\_SOD\_830.gcd  
Method Filename : Methode\_Chiral\_cyclohexyl\_aldehyde.gcm  
Batch Filename : batch\_chiral.gcb  
Vial # : 28  
Injection Volume : 1 uL  
Date Acquired : 24.08.2019 15:37:05  
Date Processed : 24.08.2019 17:08:09

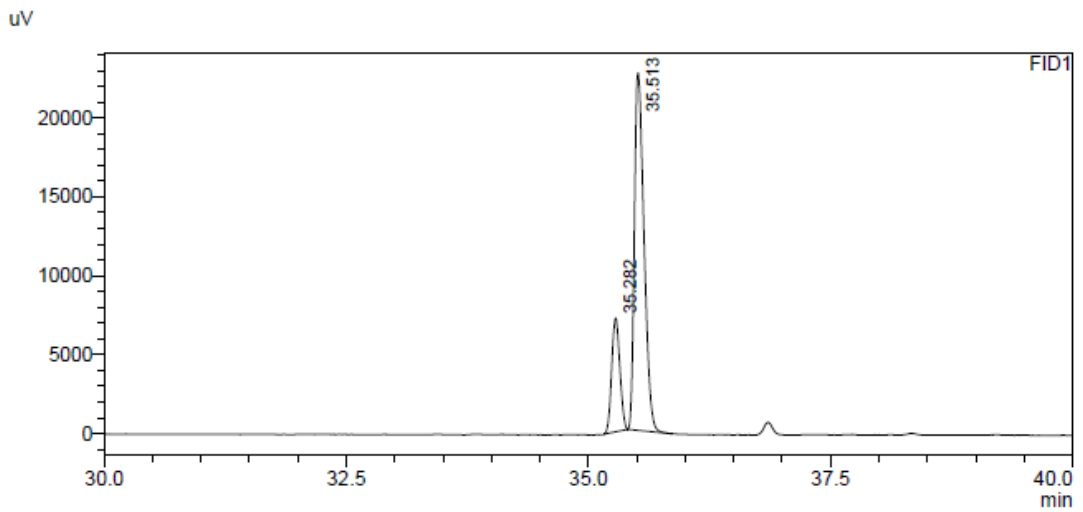

| Peak# | Ret. Time | Area   | Area%   |
|-------|-----------|--------|---------|
| 1     | 35.282    | 42079  | 21.191  |
| 2     | 35.513    | 156489 | 78.809  |
| Total |           | 198568 | 100.000 |

Sample Name : t=72\_SOD\_831  
Sample ID :  
Data Filename : t=72\_SOD\_831.gcd  
Method Filename : Methode\_Chiral\_cyclohexyl\_aldehyde.gcm  
Batch Filename : batch\_chiral.gcb  
Vial # : 29  
Injection Volume : 1 uL  
Date Acquired : 24.08.2019 17:12:34  
Date Processed : 24.08.2019 18:43:37

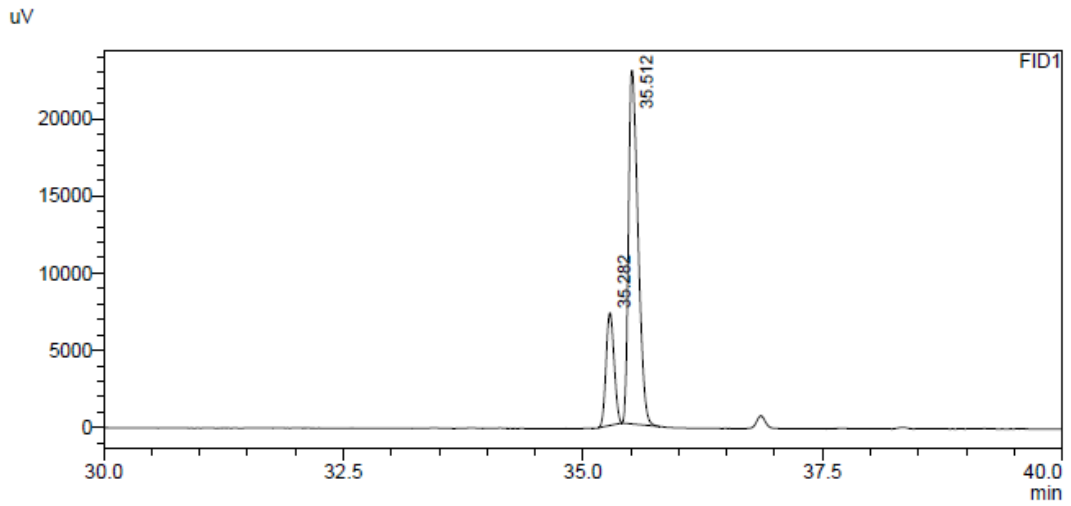

| Peak# | Ret. Time | Area   | Area%   |
|-------|-----------|--------|---------|
| 1     | 35.282    | 42708  | 21.205  |
| 2     | 35.512    | 158694 | 78.795  |
| Total |           | 201402 | 100.000 |



Sample Name : t=72\_SOD\_832  
Sample ID :  
Data Filename : t=72\_SOD\_832.gcd  
Method Filename : Methode\_Chiral\_cyclohexyl\_aldehyde.gcm  
Batch Filename : batch\_chiral.gcb  
Vial # : 30  
Injection Volume : 1 uL  
Date Acquired : 24.08.2019 18:48:01  
Date Processed : 24.08.2019 20:19:05

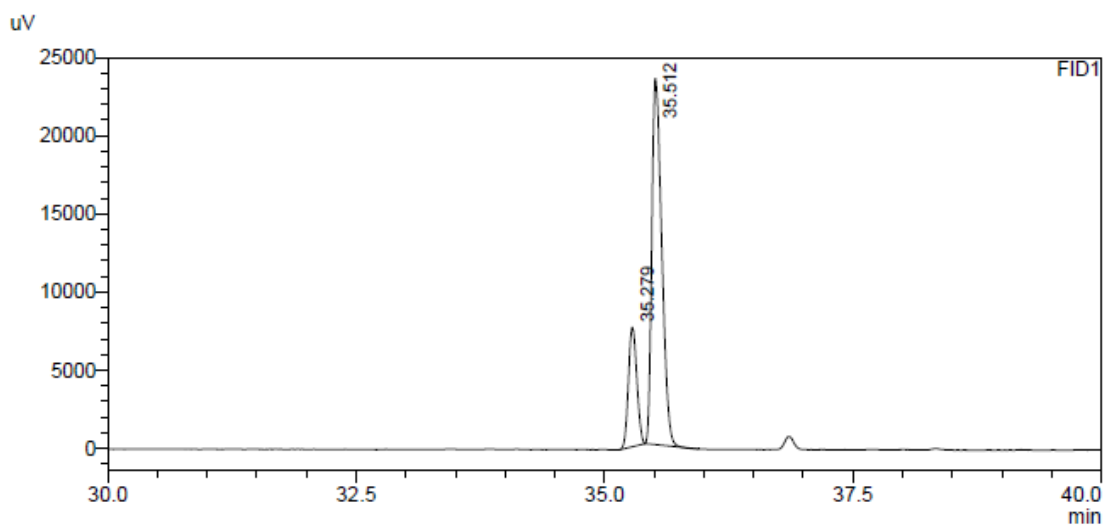

| Peak# | Ret. Time | Area   | Area%   |
|-------|-----------|--------|---------|
| 1     | 35.279    | 44923  | 21.611  |
| 2     | 35.512    | 162946 | 78.389  |
| Total |           | 207869 | 100.000 |

I, no *i*PrOH

Sample Name : t=72\_SOD\_827  
Sample ID :  
Data Filename : t=72\_SOD\_827.gcd  
Method Filename : Methode\_Chiral\_cyclohexyl\_aldehyde.gcm  
Batch Filename : batch\_chiral.gcb  
Vial # : 25  
Injection Volume : 1 uL  
Date Acquired : 24.08.2019 10:50:40  
Date Processed : 24.08.2019 12:21:42

uV

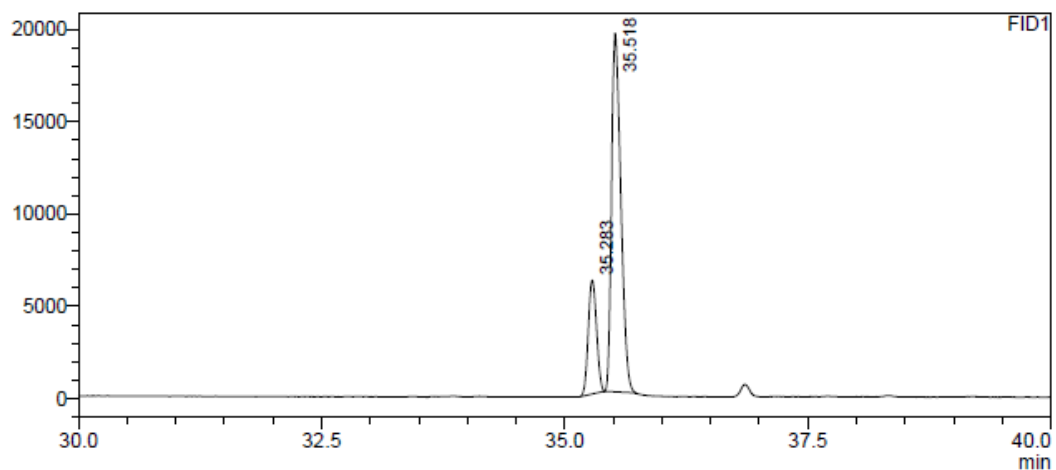

FID1

| Peak# | Ret. Time | Area   | Area%   |
|-------|-----------|--------|---------|
| 1     | 35.283    | 36598  | 22.087  |
| 2     | 35.518    | 129101 | 77.913  |
| Total |           | 165699 | 100.000 |

Sample Name : t=72\_SOD\_828  
Sample ID :  
Data Filename : t=72\_SOD\_828.gcd  
Method Filename : Methode\_Chiral\_cyclohexyl\_aldehyde.gcm  
Batch Filename : batch\_chiral.gcb  
Vial # : 26  
Injection Volume : 1 uL  
Date Acquired : 24.08.2019 12:26:08  
Date Processed : 24.08.2019 13:57:11

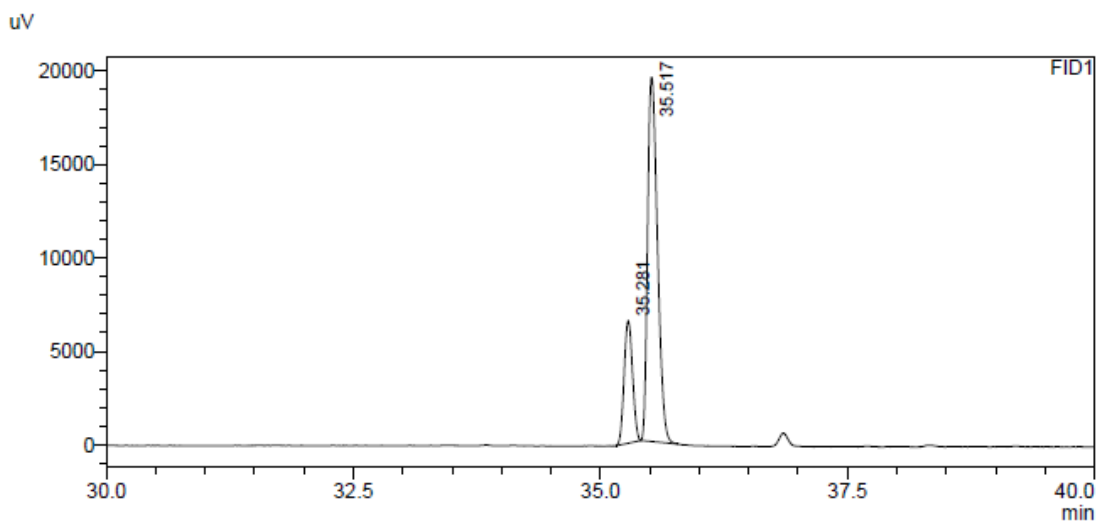

| Peak# | Ret. Time | Area   | Area%   |
|-------|-----------|--------|---------|
| 1     | 35.281    | 38884  | 22.347  |
| 2     | 35.517    | 135120 | 77.653  |
| Total |           | 174004 | 100.000 |

Sample Name : t=72\_SOD\_829  
Sample ID :  
Data Filename : t=72\_SOD\_829.gcd  
Method Filename : Methode\_Chiral\_cyclohexyl\_aldehyde.gcm  
Batch Filename : batch\_chiral.gcb  
Vial # : 27  
Injection Volume : 1 uL  
Date Acquired : 24.08.2019 14:01:36  
Date Processed : 24.08.2019 15:32:38

uV

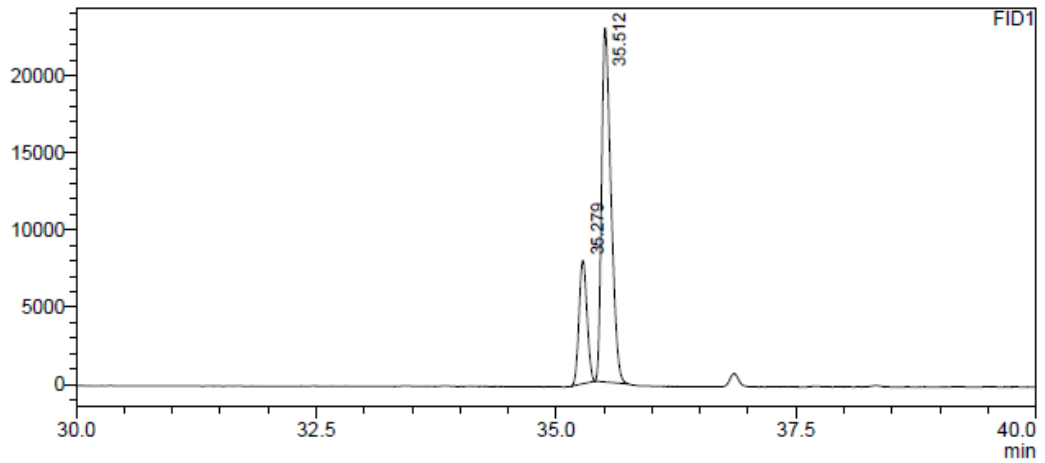

FID1

| Peak# | Ret. Time | Area   | Area%   |
|-------|-----------|--------|---------|
| 1     | 35.279    | 46181  | 22.934  |
| 2     | 35.512    | 155188 | 77.066  |
| Total |           | 201369 | 100.000 |

No 1, *i*PrOH

Sample Name : t=72\_SOD-1045  
Sample ID :  
Data Filename : t=72\_SOD-1045.gcd  
Method Filename : Methode\_Chiral\_cyclohexyl\_aldehyde.gcm  
Batch Filename : batch\_chiral.gcb  
Vial # : 4  
Injection Volume : 1 uL  
Date Acquired : 03.03.2020 19:36:38  
Date Processed : 03.03.2020 21:07:41

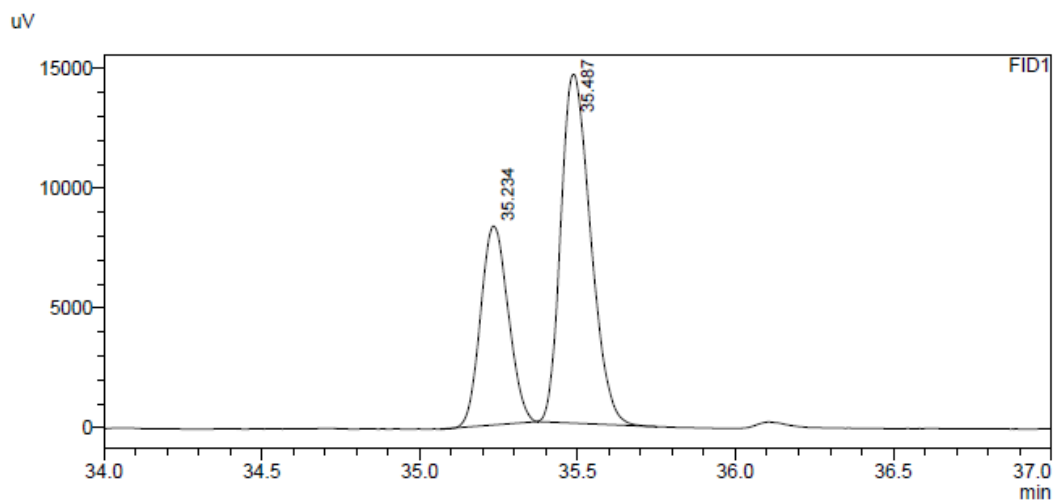

| Peak# | Ret. Time | Area   | Area%   |
|-------|-----------|--------|---------|
| 1     | 35.234    | 50666  | 34.642  |
| 2     | 35.487    | 95592  | 65.358  |
| Total |           | 146258 | 100.000 |

Sample Name : t=72\_SOD-1046  
Sample ID :  
Data Filename : t=72\_SOD-1046.gcd  
Method Filename : Methode\_Chiral\_cyclohexyl\_aldehyde.gcm  
Batch Filename : batch\_chiral.gcb  
Vial # : 5  
Injection Volume : 1 uL  
Date Acquired : 03.03.2020 21:12:05  
Date Processed : 03.03.2020 22:43:06

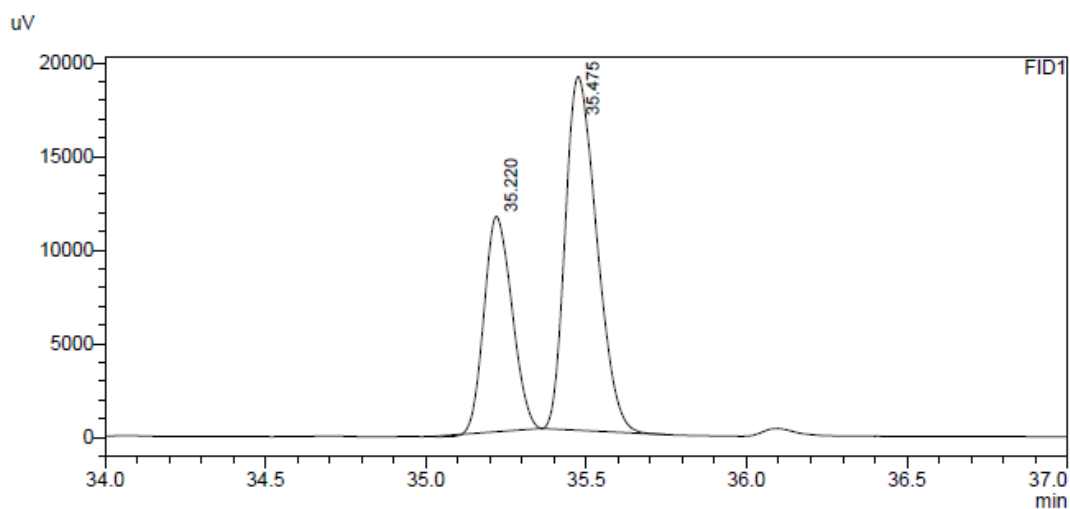

FID1

| Peak# | Ret. Time | Area   | Area%   |
|-------|-----------|--------|---------|
| 1     | 35.220    | 69503  | 34.976  |
| 2     | 35.475    | 129211 | 65.024  |
| Total |           | 198714 | 100.000 |

Sample Name : t=72\_SOD-1047  
Sample ID :  
Data Filename : t=72\_SOD-1047.gcd  
Method Filename : Methode\_Chiral\_cyclohexyl\_aldehyde.gcm  
Batch Filename : batch\_chiral.gcb  
Vial # : 6  
Injection Volume : 1 uL  
Date Acquired : 03.03.2020 22:47:25  
Date Processed : 04.03.2020 00:18:28

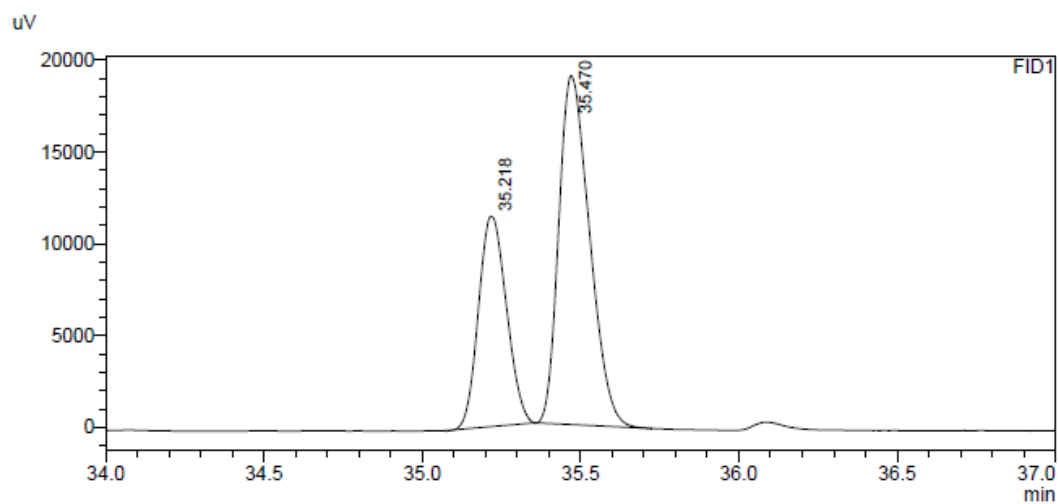

FID1

| Peak# | Ret. Time | Area   | Area%   |
|-------|-----------|--------|---------|
| 1     | 35.218    | 70392  | 35.349  |
| 2     | 35.470    | 128743 | 64.651  |
| Total |           | 199136 | 100.000 |

No I, no *i*PrOH

Sample Name : t=72\_SOD-1042  
Sample ID :  
Data Filename : t=72\_SOD-1042.gcd  
Method Filename : Methode\_Chiral\_cyclohexyl\_aldehyde.gcm  
Batch Filename : batch\_chiral.gcb  
Vial # : 1  
Injection Volume : 1 uL  
Date Acquired : 03.03.2020 14:50:25  
Date Processed : 03.03.2020 16:21:29

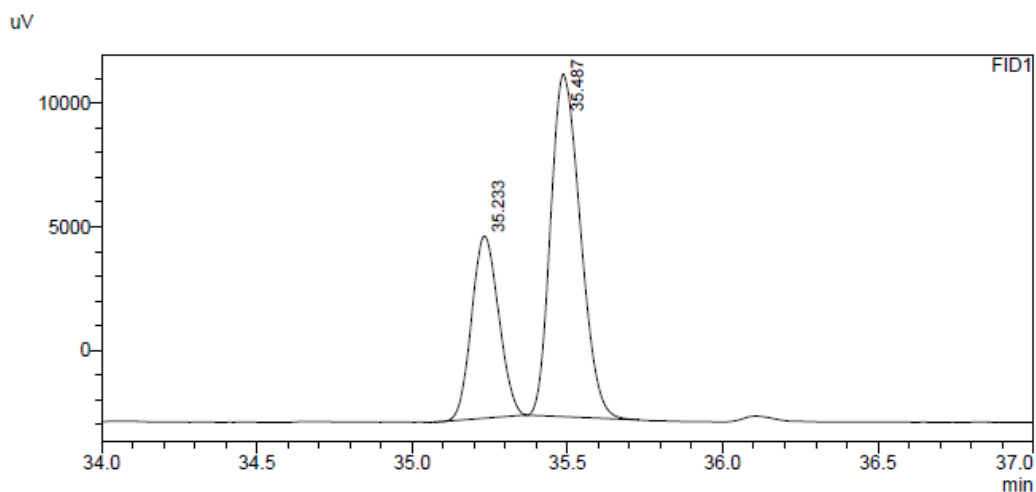

| Peak# | Ret. Time | Area   | Area%   |
|-------|-----------|--------|---------|
| 1     | 35.233    | 44652  | 32.611  |
| 2     | 35.487    | 92270  | 67.389  |
| Total |           | 136922 | 100.000 |



Sample Name : t=72\_SOD-1043  
Sample ID :  
Data Filename : t=72\_SOD-1043.gcd  
Method Filename : Methode\_Chiral\_cyclohexyl\_aldehyde.gcm  
Batch Filename : batch\_chiral.gcb  
Vial # : 2  
Injection Volume : 1 uL  
Date Acquired : 03.03.2020 16:25:51  
Date Processed : 03.03.2020 17:56:55

uV

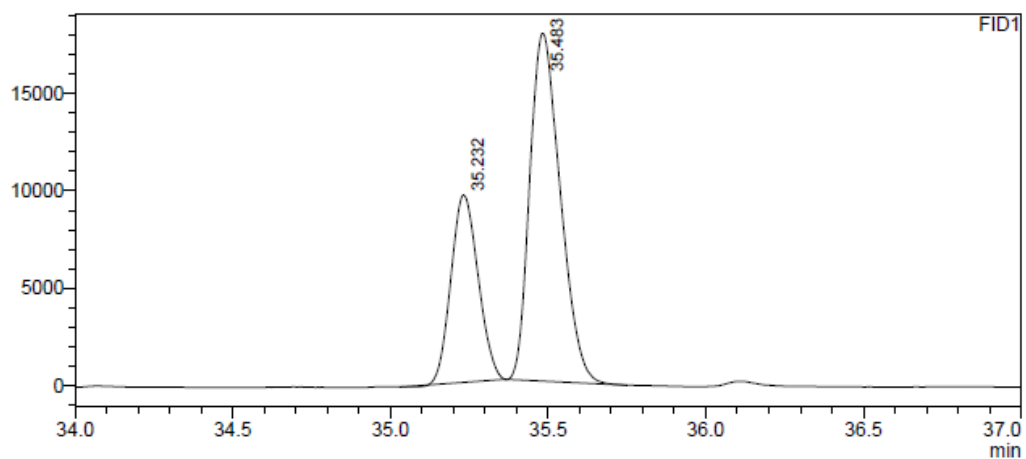

FID1

| Peak# | Ret. Time | Area   | Area%   |
|-------|-----------|--------|---------|
| 1     | 35.232    | 57510  | 32.373  |
| 2     | 35.483    | 120138 | 67.627  |
| Total |           | 177648 | 100.000 |

Sample Name : t=72\_SOD-1044  
Sample ID :  
Data Filename : t=72\_SOD-1044.gcd  
Method Filename : Methode\_Chiral\_cyclohexyl\_aldehyde.gcm  
Batch Filename : batch\_chiral.gcb  
Vial # : 3  
Injection Volume : 1 uL  
Date Acquired : 03.03.2020 18:01:14  
Date Processed : 03.03.2020 19:32:18

uV

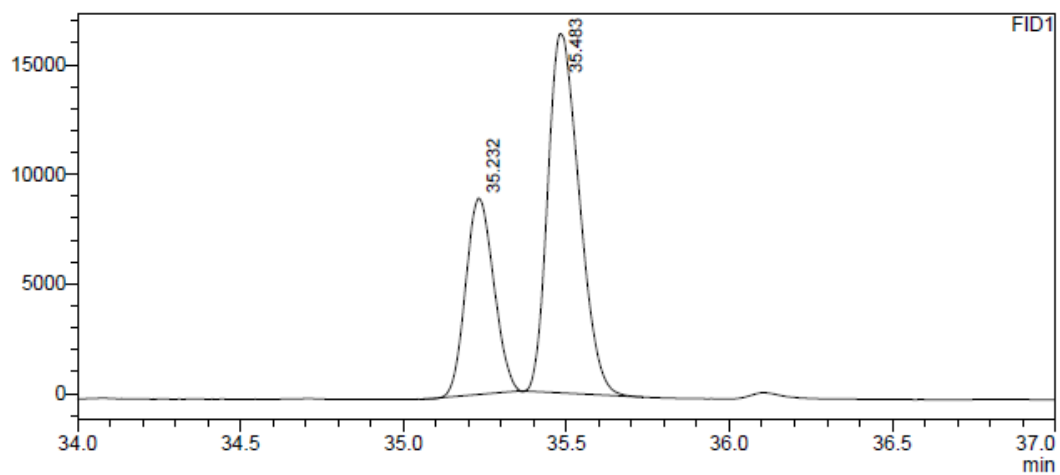

FID1

| Peak# | Ret. Time | Area   | Area%   |
|-------|-----------|--------|---------|
| 1     | 35.232    | 53538  | 32.738  |
| 2     | 35.483    | 109998 | 67.262  |
| Total |           | 163536 | 100.000 |
